# Supplementary material for: Leveraging mobility data to analyze persistent SARS-CoV-2 mutations and inform targeted genomic surveillance
Source: eLife. 2025 Jan 15;13:RP94045. doi: 10.7554/eLife.94045 (PMC11735024; doi:10.7554/eLife.94045)
Supplement: Figure 1—source data 1. — The respective proportions of Alpha and non-Alpha samples are calculated. [file elife-94045-fig1-data1.xlsx]

## Sheet: Figure 1-source data 1
Month	id	Federal_State	n_total	n_Alpha	percentage_Alpha	n_rest	percentage_rest
2020-Jan	1	Baden-Württemberg	0	0	0	0	0
2020-Jan	9	Bayern	3	0	0	3	100
2020-Jan	10	Berlin	0	0	0	0	0
2020-Jan	11	Brandenburg	0	0	0	0	0
2020-Jan	12	Bremen	0	0	0	0	0
2020-Jan	13	Hamburg	0	0	0	0	0
2020-Jan	14	Hessen	0	0	0	0	0
2020-Jan	15	Mecklenburg-Vorpommern	0	0	0	0	0
2020-Jan	16	Niedersachsen	0	0	0	0	0
2020-Jan	2	Nordrhein-Westfalen	2	0	0	2	100
2020-Jan	3	Rheinland-Pfalz	0	0	0	0	0
2020-Jan	4	Saarland	0	0	0	0	0
2020-Jan	6	Sachsen	0	0	0	0	0
2020-Jan	5	Sachsen-Anhalt	0	0	0	0	0
2020-Jan	7	Schleswig-Holstein	0	0	0	0	0
2020-Jan	8	Thuringia	0	0	0	0	0
2020-Feb	1	Baden-Württemberg	1	0	0	1	100
2020-Feb	9	Bayern	3	1	33.3333	2	66.6667
2020-Feb	10	Berlin	0	0	0	0	0
2020-Feb	11	Brandenburg	0	0	0	0	0
2020-Feb	12	Bremen	1	0	0	1	100
2020-Feb	13	Hamburg	0	0	0	0	0
2020-Feb	14	Hessen	0	0	0	0	0
2020-Feb	15	Mecklenburg-Vorpommern	0	0	0	0	0
2020-Feb	16	Niedersachsen	0	0	0	0	0
2020-Feb	2	Nordrhein-Westfalen	0	0	0	0	0
2020-Feb	3	Rheinland-Pfalz	0	0	0	0	0
2020-Feb	4	Saarland	0	0	0	0	0
2020-Feb	6	Sachsen	1	0	0	1	100
2020-Feb	5	Sachsen-Anhalt	0	0	0	0	0
2020-Feb	7	Schleswig-Holstein	0	0	0	0	0
2020-Feb	8	Thuringia	0	0	0	0	0
2020-Mar	1	Baden-Württemberg	140	0	0	140	100
2020-Mar	9	Bayern	8	0	0	8	100
2020-Mar	10	Berlin	0	0	0	0	0
2020-Mar	11	Brandenburg	0	0	0	0	0
2020-Mar	12	Bremen	0	0	0	0	0
2020-Mar	13	Hamburg	8	0	0	8	100
2020-Mar	14	Hessen	0	0	0	0	0
2020-Mar	15	Mecklenburg-Vorpommern	0	0	0	0	0
2020-Mar	16	Niedersachsen	0	0	0	0	0
2020-Mar	2	Nordrhein-Westfalen	0	0	0	0	0
2020-Mar	3	Rheinland-Pfalz	0	0	0	0	0
2020-Mar	4	Saarland	14	0	0	14	100
2020-Mar	6	Sachsen	15	0	0	15	100
2020-Mar	5	Sachsen-Anhalt	0	0	0	0	0
2020-Mar	7	Schleswig-Holstein	7	0	0	7	100
2020-Mar	8	Thuringia	12	0	0	12	100
2020-Apr	1	Baden-Württemberg	20	0	0	20	100
2020-Apr	9	Bayern	17	0	0	17	100
2020-Apr	10	Berlin	0	0	0	0	0
2020-Apr	11	Brandenburg	0	0	0	0	0
2020-Apr	12	Bremen	0	0	0	0	0
2020-Apr	13	Hamburg	2	0	0	2	100
2020-Apr	14	Hessen	0	0	0	0	0
2020-Apr	15	Mecklenburg-Vorpommern	0	0	0	0	0
2020-Apr	16	Niedersachsen	0	0	0	0	0
2020-Apr	2	Nordrhein-Westfalen	0	0	0	0	0
2020-Apr	3	Rheinland-Pfalz	0	0	0	0	0
2020-Apr	4	Saarland	9	0	0	9	100
2020-Apr	6	Sachsen	0	0	0	0	0
2020-Apr	5	Sachsen-Anhalt	0	0	0	0	0
2020-Apr	7	Schleswig-Holstein	9	0	0	9	100
2020-Apr	8	Thuringia	34	0	0	34	100
2020-May	1	Baden-Württemberg	4	0	0	4	100
2020-May	9	Bayern	10	3	30	7	70
2020-May	10	Berlin	0	0	0	0	0
2020-May	11	Brandenburg	0	0	0	0	0
2020-May	12	Bremen	0	0	0	0	0
2020-May	13	Hamburg	1	0	0	1	100
2020-May	14	Hessen	0	0	0	0	0
2020-May	15	Mecklenburg-Vorpommern	0	0	0	0	0
2020-May	16	Niedersachsen	0	0	0	0	0
2020-May	2	Nordrhein-Westfalen	0	0	0	0	0
2020-May	3	Rheinland-Pfalz	0	0	0	0	0
2020-May	4	Saarland	0	0	0	0	0
2020-May	6	Sachsen	12	12	100	0	0
2020-May	5	Sachsen-Anhalt	0	0	0	0	0
2020-May	7	Schleswig-Holstein	4	0	0	4	100
2020-May	8	Thuringia	9	0	0	9	100
2020-Jun	1	Baden-Württemberg	2	0	0	2	100
2020-Jun	9	Bayern	5	0	0	5	100
2020-Jun	10	Berlin	0	0	0	0	0
2020-Jun	11	Brandenburg	0	0	0	0	0
2020-Jun	12	Bremen	0	0	0	0	0
2020-Jun	13	Hamburg	0	0	0	0	0
2020-Jun	14	Hessen	0	0	0	0	0
2020-Jun	15	Mecklenburg-Vorpommern	0	0	0	0	0
2020-Jun	16	Niedersachsen	0	0	0	0	0
2020-Jun	2	Nordrhein-Westfalen	0	0	0	0	0
2020-Jun	3	Rheinland-Pfalz	0	0	0	0	0
2020-Jun	4	Saarland	0	0	0	0	0
2020-Jun	6	Sachsen	16	14	87.5	2	12.5
2020-Jun	5	Sachsen-Anhalt	0	0	0	0	0
2020-Jun	7	Schleswig-Holstein	0	0	0	0	0
2020-Jun	8	Thuringia	0	0	0	0	0
2020-Jul	1	Baden-Württemberg	1	0	0	1	100
2020-Jul	9	Bayern	1	0	0	1	100
2020-Jul	10	Berlin	0	0	0	0	0
2020-Jul	11	Brandenburg	0	0	0	0	0
2020-Jul	12	Bremen	0	0	0	0	0
2020-Jul	13	Hamburg	0	0	0	0	0
2020-Jul	14	Hessen	0	0	0	0	0
2020-Jul	15	Mecklenburg-Vorpommern	0	0	0	0	0
2020-Jul	16	Niedersachsen	0	0	0	0	0
2020-Jul	2	Nordrhein-Westfalen	5	0	0	5	100
2020-Jul	3	Rheinland-Pfalz	0	0	0	0	0
2020-Jul	4	Saarland	0	0	0	0	0
2020-Jul	6	Sachsen	1	0	0	1	100
2020-Jul	5	Sachsen-Anhalt	0	0	0	0	0
2020-Jul	7	Schleswig-Holstein	2	0	0	2	100
2020-Jul	8	Thuringia	0	0	0	0	0
2020-Aug	1	Baden-Württemberg	4	0	0	4	100
2020-Aug	9	Bayern	0	0	0	0	0
2020-Aug	10	Berlin	0	0	0	0	0
2020-Aug	11	Brandenburg	0	0	0	0	0
2020-Aug	12	Bremen	0	0	0	0	0
2020-Aug	13	Hamburg	3	0	0	3	100
2020-Aug	14	Hessen	0	0	0	0	0
2020-Aug	15	Mecklenburg-Vorpommern	0	0	0	0	0
2020-Aug	16	Niedersachsen	0	0	0	0	0
2020-Aug	2	Nordrhein-Westfalen	42	0	0	42	100
2020-Aug	3	Rheinland-Pfalz	0	0	0	0	0
2020-Aug	4	Saarland	1	0	0	1	100
2020-Aug	6	Sachsen	4	0	0	4	100
2020-Aug	5	Sachsen-Anhalt	0	0	0	0	0
2020-Aug	7	Schleswig-Holstein	0	0	0	0	0
2020-Aug	8	Thuringia	1	0	0	1	100
2020-Sep	1	Baden-Württemberg	0	0	0	0	0
2020-Sep	9	Bayern	3	0	0	3	100
2020-Sep	10	Berlin	0	0	0	0	0
2020-Sep	11	Brandenburg	0	0	0	0	0
2020-Sep	12	Bremen	0	0	0	0	0
2020-Sep	13	Hamburg	6	0	0	6	100
2020-Sep	14	Hessen	0	0	0	0	0
2020-Sep	15	Mecklenburg-Vorpommern	0	0	0	0	0
2020-Sep	16	Niedersachsen	0	0	0	0	0
2020-Sep	2	Nordrhein-Westfalen	110	0	0	110	100
2020-Sep	3	Rheinland-Pfalz	0	0	0	0	0
2020-Sep	4	Saarland	16	0	0	16	100
2020-Sep	6	Sachsen	0	0	0	0	0
2020-Sep	5	Sachsen-Anhalt	0	0	0	0	0
2020-Sep	7	Schleswig-Holstein	0	0	0	0	0
2020-Sep	8	Thuringia	0	0	0	0	0
2020-Oct	1	Baden-Württemberg	9	0	0	9	100
2020-Oct	9	Bayern	0	0	0	0	0
2020-Oct	10	Berlin	0	0	0	0	0
2020-Oct	11	Brandenburg	0	0	0	0	0
2020-Oct	12	Bremen	0	0	0	0	0
2020-Oct	13	Hamburg	25	0	0	25	100
2020-Oct	14	Hessen	0	0	0	0	0
2020-Oct	15	Mecklenburg-Vorpommern	0	0	0	0	0
2020-Oct	16	Niedersachsen	0	0	0	0	0
2020-Oct	2	Nordrhein-Westfalen	112	0	0	112	100
2020-Oct	3	Rheinland-Pfalz	0	0	0	0	0
2020-Oct	4	Saarland	200	0	0	200	100
2020-Oct	6	Sachsen	0	0	0	0	0
2020-Oct	5	Sachsen-Anhalt	0	0	0	0	0
2020-Oct	7	Schleswig-Holstein	0	0	0	0	0
2020-Oct	8	Thuringia	0	0	0	0	0
2020-Nov	1	Baden-Württemberg	33	0	0	33	100
2020-Nov	9	Bayern	77	0	0	77	100
2020-Nov	10	Berlin	0	0	0	0	0
2020-Nov	11	Brandenburg	0	0	0	0	0
2020-Nov	12	Bremen	0	0	0	0	0
2020-Nov	13	Hamburg	48	0	0	48	100
2020-Nov	14	Hessen	0	0	0	0	0
2020-Nov	15	Mecklenburg-Vorpommern	6	0	0	6	100
2020-Nov	16	Niedersachsen	17	1	5.88235	16	94.1176
2020-Nov	2	Nordrhein-Westfalen	212	0	0	212	100
2020-Nov	3	Rheinland-Pfalz	0	0	0	0	0
2020-Nov	4	Saarland	125	0	0	125	100
2020-Nov	6	Sachsen	0	0	0	0	0
2020-Nov	5	Sachsen-Anhalt	0	0	0	0	0
2020-Nov	7	Schleswig-Holstein	0	0	0	0	0
2020-Nov	8	Thuringia	3	0	0	3	100
2020-Dec-1st-half	1	Baden-Württemberg	93	1	1.07527	92	98.9247
2020-Dec-1st-half	9	Bayern	39	0	0	39	100
2020-Dec-1st-half	10	Berlin	1	0	0	1	100
2020-Dec-1st-half	11	Brandenburg	0	0	0	0	0
2020-Dec-1st-half	12	Bremen	0	0	0	0	0
2020-Dec-1st-half	13	Hamburg	7	0	0	7	100
2020-Dec-1st-half	14	Hessen	0	0	0	0	0
2020-Dec-1st-half	15	Mecklenburg-Vorpommern	2	0	0	2	100
2020-Dec-1st-half	16	Niedersachsen	2	1	50	1	50
2020-Dec-1st-half	2	Nordrhein-Westfalen	137	0	0	137	100
2020-Dec-1st-half	3	Rheinland-Pfalz	0	0	0	0	0
2020-Dec-1st-half	4	Saarland	101	0	0	101	100
2020-Dec-1st-half	6	Sachsen	1	0	0	1	100
2020-Dec-1st-half	5	Sachsen-Anhalt	0	0	0	0	0
2020-Dec-1st-half	7	Schleswig-Holstein	0	0	0	0	0
2020-Dec-1st-half	8	Thuringia	15	0	0	15	100
2020-Dec-2nd-half	1	Baden-Württemberg	66	0	0	66	100
2020-Dec-2nd-half	9	Bayern	79	4	5.06329	75	94.9367
2020-Dec-2nd-half	10	Berlin	1	1	100	0	0
2020-Dec-2nd-half	11	Brandenburg	0	0	0	0	0
2020-Dec-2nd-half	12	Bremen	3	0	0	3	100
2020-Dec-2nd-half	13	Hamburg	0	0	0	0	0
2020-Dec-2nd-half	14	Hessen	1	1	100	0	0
2020-Dec-2nd-half	15	Mecklenburg-Vorpommern	4	0	0	4	100
2020-Dec-2nd-half	16	Niedersachsen	16	0	0	16	100
2020-Dec-2nd-half	2	Nordrhein-Westfalen	84	3	3.57143	81	96.4286
2020-Dec-2nd-half	3	Rheinland-Pfalz	0	0	0	0	0
2020-Dec-2nd-half	4	Saarland	32	0	0	32	100
2020-Dec-2nd-half	6	Sachsen	19	0	0	19	100
2020-Dec-2nd-half	5	Sachsen-Anhalt	0	0	0	0	0
2020-Dec-2nd-half	7	Schleswig-Holstein	0	0	0	0	0
2020-Dec-2nd-half	8	Thuringia	6	0	0	6	100
2021-Jan-1st-half	1	Baden-Württemberg	486	14	2.88066	472	97.1193
2021-Jan-1st-half	9	Bayern	96	16	16.6667	80	83.3333
2021-Jan-1st-half	10	Berlin	8	0	0	8	100
2021-Jan-1st-half	11	Brandenburg	19	1	5.26316	18	94.7368
2021-Jan-1st-half	12	Bremen	5	0	0	5	100
2021-Jan-1st-half	13	Hamburg	17	2	11.7647	15	88.2353
2021-Jan-1st-half	14	Hessen	9	3	33.3333	6	66.6667
2021-Jan-1st-half	15	Mecklenburg-Vorpommern	11	0	0	11	100
2021-Jan-1st-half	16	Niedersachsen	70	3	4.28571	67	95.7143
2021-Jan-1st-half	2	Nordrhein-Westfalen	230	18	7.82609	212	92.1739
2021-Jan-1st-half	3	Rheinland-Pfalz	0	0	0	0	0
2021-Jan-1st-half	4	Saarland	102	0	0	102	100
2021-Jan-1st-half	6	Sachsen	281	6	2.13523	275	97.8648
2021-Jan-1st-half	5	Sachsen-Anhalt	2	0	0	2	100
2021-Jan-1st-half	7	Schleswig-Holstein	32	20	62.5	12	37.5
2021-Jan-1st-half	8	Thuringia	25	0	0	25	100
2021-Jan-2nd-half	1	Baden-Württemberg	1262	122	9.66719	1140	90.3328
2021-Jan-2nd-half	9	Bayern	623	113	18.138	510	81.862
2021-Jan-2nd-half	10	Berlin	564	48	8.51064	516	91.4894
2021-Jan-2nd-half	11	Brandenburg	144	5	3.47222	139	96.5278
2021-Jan-2nd-half	12	Bremen	197	6	3.04569	191	96.9543
2021-Jan-2nd-half	13	Hamburg	243	22	9.0535	221	90.9465
2021-Jan-2nd-half	14	Hessen	90	11	12.2222	79	87.7778
2021-Jan-2nd-half	15	Mecklenburg-Vorpommern	54	0	0	54	100
2021-Jan-2nd-half	16	Niedersachsen	230	25	10.8696	205	89.1304
2021-Jan-2nd-half	2	Nordrhein-Westfalen	753	95	12.6162	658	87.3838
2021-Jan-2nd-half	3	Rheinland-Pfalz	66	11	16.6667	55	83.3333
2021-Jan-2nd-half	4	Saarland	89	14	15.7303	75	84.2697
2021-Jan-2nd-half	6	Sachsen	868	75	8.64055	793	91.3594
2021-Jan-2nd-half	5	Sachsen-Anhalt	252	15	5.95238	237	94.0476
2021-Jan-2nd-half	7	Schleswig-Holstein	176	107	60.7955	69	39.2045
2021-Jan-2nd-half	8	Thuringia	75	2	2.66667	73	97.3333
2021-Feb	1	Baden-Württemberg	5009	1625	32.4416	3384	67.5584
2021-Feb	9	Bayern	3679	2201	59.826	1478	40.174
2021-Feb	10	Berlin	1539	536	34.8278	1003	65.1722
2021-Feb	11	Brandenburg	524	180	34.3511	344	65.6489
2021-Feb	12	Bremen	450	158	35.1111	292	64.8889
2021-Feb	13	Hamburg	1484	576	38.814	908	61.186
2021-Feb	14	Hessen	433	249	57.5058	184	42.4942
2021-Feb	15	Mecklenburg-Vorpommern	179	88	49.162	91	50.838
2021-Feb	16	Niedersachsen	721	294	40.7767	427	59.2233
2021-Feb	2	Nordrhein-Westfalen	4849	1747	36.028	3102	63.972
2021-Feb	3	Rheinland-Pfalz	497	340	68.4105	157	31.5895
2021-Feb	4	Saarland	249	78	31.3253	171	68.6747
2021-Feb	6	Sachsen	2653	982	37.0147	1671	62.9853
2021-Feb	5	Sachsen-Anhalt	479	116	24.2171	363	75.7829
2021-Feb	7	Schleswig-Holstein	938	294	31.3433	644	68.6567
2021-Feb	8	Thuringia	692	360	52.0231	332	47.9769
2021-Mar	1	Baden-Württemberg	13992	10528	75.243	3464	24.757
2021-Mar	9	Bayern	3784	2411	63.7156	1373	36.2844
2021-Mar	10	Berlin	1817	1458	80.2422	359	19.7578
2021-Mar	11	Brandenburg	626	481	76.8371	145	23.1629
2021-Mar	12	Bremen	855	651	76.1404	204	23.8596
2021-Mar	13	Hamburg	2346	1970	83.9727	376	16.0273
2021-Mar	14	Hessen	680	495	72.7941	185	27.2059
2021-Mar	15	Mecklenburg-Vorpommern	223	88	39.4619	135	60.5381
2021-Mar	16	Niedersachsen	867	663	76.4706	204	23.5294
2021-Mar	2	Nordrhein-Westfalen	9189	7604	82.7511	1585	17.2489
2021-Mar	3	Rheinland-Pfalz	1938	1679	86.6357	259	13.3643
2021-Mar	4	Saarland	399	199	49.8747	200	50.1253
2021-Mar	6	Sachsen	4138	3280	79.2653	858	20.7347
2021-Mar	5	Sachsen-Anhalt	1045	803	76.8421	242	23.1579
2021-Mar	7	Schleswig-Holstein	1677	1100	65.5933	577	34.4067
2021-Mar	8	Thuringia	2500	2250	90	250	10
2021-Apr	1	Baden-Württemberg	16781	15107	90.0244	1674	9.97557
2021-Apr	9	Bayern	3833	3032	79.1025	801	20.8975
2021-Apr	10	Berlin	1671	1381	82.6451	290	17.3549
2021-Apr	11	Brandenburg	725	627	86.4828	98	13.5172
2021-Apr	12	Bremen	887	779	87.8241	108	12.1759
2021-Apr	13	Hamburg	2005	1869	93.217	136	6.78304
2021-Apr	14	Hessen	1692	1500	88.6525	192	11.3475
2021-Apr	15	Mecklenburg-Vorpommern	359	228	63.5097	131	36.4903
2021-Apr	16	Niedersachsen	962	823	85.5509	139	14.4491
2021-Apr	2	Nordrhein-Westfalen	16184	15204	93.9446	980	6.05536
2021-Apr	3	Rheinland-Pfalz	3000	2805	93.5	195	6.5
2021-Apr	4	Saarland	428	391	91.3551	37	8.64486
2021-Apr	6	Sachsen	4232	3981	94.069	251	5.931
2021-Apr	5	Sachsen-Anhalt	1438	1291	89.7775	147	10.2225
2021-Apr	7	Schleswig-Holstein	1892	1544	81.6068	348	18.3932
2021-Apr	8	Thuringia	3007	2927	97.3395	80	2.66046
2021-May	1	Baden-Württemberg	11325	10016	88.4415	1309	11.5585
2021-May	9	Bayern	2292	1651	72.0332	641	27.9668
2021-May	10	Berlin	913	606	66.3746	307	33.6254
2021-May	11	Brandenburg	532	464	87.218	68	12.782
2021-May	12	Bremen	258	196	75.969	62	24.031
2021-May	13	Hamburg	1804	1710	94.7894	94	5.21064
2021-May	14	Hessen	1490	1240	83.2215	250	16.7785
2021-May	15	Mecklenburg-Vorpommern	462	367	79.4372	95	20.5628
2021-May	16	Niedersachsen	962	780	81.0811	182	18.9189
2021-May	2	Nordrhein-Westfalen	11985	11052	92.2153	933	7.78473
2021-May	3	Rheinland-Pfalz	1052	930	88.403	122	11.597
2021-May	4	Saarland	423	366	86.5248	57	13.4752
2021-May	6	Sachsen	3323	3076	92.567	247	7.43304
2021-May	5	Sachsen-Anhalt	901	863	95.7825	38	4.21754
2021-May	7	Schleswig-Holstein	1594	1291	80.9912	303	19.0088
2021-May	8	Thuringia	791	748	94.5638	43	5.43616
2021-Jun	1	Baden-Württemberg	3592	2279	63.4465	1313	36.5535
2021-Jun	9	Bayern	1231	603	48.9846	628	51.0154
2021-Jun	10	Berlin	551	330	59.8911	221	40.1089
2021-Jun	11	Brandenburg	117	78	66.6667	39	33.3333
2021-Jun	12	Bremen	92	49	53.2609	43	46.7391
2021-Jun	13	Hamburg	505	199	39.4059	306	60.5941
2021-Jun	14	Hessen	581	277	47.6764	304	52.3236
2021-Jun	15	Mecklenburg-Vorpommern	91	36	39.5604	55	60.4396
2021-Jun	16	Niedersachsen	256	136	53.125	120	46.875
2021-Jun	2	Nordrhein-Westfalen	2851	2206	77.3764	645	22.6236
2021-Jun	3	Rheinland-Pfalz	341	188	55.132	153	44.868
2021-Jun	4	Saarland	109	80	73.3945	29	26.6055
2021-Jun	6	Sachsen	1145	651	56.8559	494	43.1441
2021-Jun	5	Sachsen-Anhalt	118	102	86.4407	16	13.5593
2021-Jun	7	Schleswig-Holstein	581	261	44.9225	320	55.0775
2021-Jun	8	Thuringia	42	19	45.2381	23	54.7619
2021-Jul	1	Baden-Württemberg	2637	119	4.5127	2518	95.4873
2021-Jul	9	Bayern	1958	80	4.0858	1878	95.9142
2021-Jul	10	Berlin	915	28	3.06011	887	96.9399
2021-Jul	11	Brandenburg	142	9	6.33803	133	93.662
2021-Jul	12	Bremen	97	3	3.09278	94	96.9072
2021-Jul	13	Hamburg	829	23	2.77443	806	97.2256
2021-Jul	14	Hessen	671	38	5.66319	633	94.3368
2021-Jul	15	Mecklenburg-Vorpommern	173	1	0.578035	172	99.422
2021-Jul	16	Niedersachsen	353	13	3.68272	340	96.3173
2021-Jul	2	Nordrhein-Westfalen	2608	116	4.44785	2492	95.5521
2021-Jul	3	Rheinland-Pfalz	420	9	2.14286	411	97.8571
2021-Jul	4	Saarland	123	3	2.43902	120	97.561
2021-Jul	6	Sachsen	1022	59	5.77299	963	94.227
2021-Jul	5	Sachsen-Anhalt	60	1	1.66667	59	98.3333
2021-Jul	7	Schleswig-Holstein	1570	51	3.24841	1519	96.7516
2021-Jul	8	Thuringia	11	1	9.09091	10	90.9091
2021-Aug	1	Baden-Württemberg	9075	19	0.209366	9056	99.7906
2021-Aug	9	Bayern	5904	19	0.321816	5885	99.6782
2021-Aug	10	Berlin	2971	9	0.302928	2962	99.6971
2021-Aug	11	Brandenburg	274	0	0	274	100
2021-Aug	12	Bremen	40	0	0	40	100
2021-Aug	13	Hamburg	1898	3	0.158061	1895	99.8419
2021-Aug	14	Hessen	1514	11	0.726552	1503	99.2734
2021-Aug	15	Mecklenburg-Vorpommern	489	0	0	489	100
2021-Aug	16	Niedersachsen	739	2	0.270636	737	99.7294
2021-Aug	2	Nordrhein-Westfalen	9901	51	0.515099	9850	99.4849
2021-Aug	3	Rheinland-Pfalz	1281	7	0.546448	1274	99.4536
2021-Aug	4	Saarland	386	0	0	386	100
2021-Aug	6	Sachsen	1894	7	0.369588	1887	99.6304
2021-Aug	5	Sachsen-Anhalt	133	1	0.75188	132	99.2481
2021-Aug	7	Schleswig-Holstein	4140	7	0.169082	4133	99.8309
2021-Aug	8	Thuringia	55	0	0	55	100
2021-Sep	1	Baden-Württemberg	13195	1	0.00757863	13194	99.9924
2021-Sep	9	Bayern	8236	2	0.0242836	8234	99.9757
2021-Sep	10	Berlin	2373	5	0.210704	2368	99.7893
2021-Sep	11	Brandenburg	345	0	0	345	100
2021-Sep	12	Bremen	290	0	0	290	100
2021-Sep	13	Hamburg	1882	0	0	1882	100
2021-Sep	14	Hessen	1885	2	0.106101	1883	99.8939
2021-Sep	15	Mecklenburg-Vorpommern	291	0	0	291	100
2021-Sep	16	Niedersachsen	1098	0	0	1098	100
2021-Sep	2	Nordrhein-Westfalen	13870	3	0.0216294	13867	99.9784
2021-Sep	3	Rheinland-Pfalz	1785	5	0.280112	1780	99.7199
2021-Sep	4	Saarland	318	0	0	318	100
2021-Sep	6	Sachsen	2690	4	0.148699	2686	99.8513
2021-Sep	5	Sachsen-Anhalt	267	0	0	267	100
2021-Sep	7	Schleswig-Holstein	2876	0	0	2876	100
2021-Sep	8	Thuringia	116	0	0	116	100
