# Supplementary material for: Leveraging mobility data to analyze persistent SARS-CoV-2 mutations and inform targeted genomic surveillance
Source: eLife. 2025 Jan 15;13:RP94045. doi: 10.7554/eLife.94045 (PMC11735024; doi:10.7554/eLife.94045)
Supplement: Figure 1—source data 2. — The respective proportions of Alpha and non-Alpha samples are calculated. [file elife-94045-fig1-data2.xlsx]

## Sheet: Figure 1-source data 2
Month	District	id	n_total	n_Alpha	percentage_Alpha	n_rest	percentage_rest
2020-Jan	Landkreis Altenburger Land	16077	0	0	0	0	0
2020-Jan	Landkreis Eichsfeld	16061	0	0	0	0	0
2020-Jan	Landkreis Eisenach; Stadt	16056	0	0	0	0	0
2020-Jan	Landkreis Erfurt; Stadt	16051	0	0	0	0	0
2020-Jan	Landkreis Gera; Stadt	16052	0	0	0	0	0
2020-Jan	Landkreis Gotha	16067	0	0	0	0	0
2020-Jan	Landkreis Greiz	16076	0	0	0	0	0
2020-Jan	Landkreis Hildburghausen	16069	0	0	0	0	0
2020-Jan	Landkreis Ilm-Kreis	16070	0	0	0	0	0
2020-Jan	Landkreis Jena; Stadt	16053	0	0	0	0	0
2020-Jan	Landkreis Kyffhäuserkreis	16065	0	0	0	0	0
2020-Jan	Landkreis Nordhausen	16062	0	0	0	0	0
2020-Jan	Landkreis Saale-Holzland-Kreis	16074	0	0	0	0	0
2020-Jan	Landkreis Saale-Orla-Kreis	16075	0	0	0	0	0
2020-Jan	Landkreis Saalfeld-Rudolstadt	16073	0	0	0	0	0
2020-Jan	Landkreis Schmalkalden-Meiningen	16066	0	0	0	0	0
2020-Jan	Landkreis Sömmerda	16068	0	0	0	0	0
2020-Jan	Landkreis Sonneberg	16072	0	0	0	0	0
2020-Jan	Landkreis Suhl; Stadt	16054	0	0	0	0	0
2020-Jan	Landkreis Unstrut-Hainich-Kreis	16064	0	0	0	0	0
2020-Jan	Landkreis Wartburgkreis	16063	0	0	0	0	0
2020-Jan	Landkreis Weimarer Land	16071	0	0	0	0	0
2020-Jan	Landkreis Weimar; Stadt	16055	0	0	0	0	0
2020-Feb	Landkreis Altenburger Land	16077	0	0	0	0	0
2020-Feb	Landkreis Eichsfeld	16061	0	0	0	0	0
2020-Feb	Landkreis Eisenach; Stadt	16056	0	0	0	0	0
2020-Feb	Landkreis Erfurt; Stadt	16051	0	0	0	0	0
2020-Feb	Landkreis Gera; Stadt	16052	0	0	0	0	0
2020-Feb	Landkreis Gotha	16067	0	0	0	0	0
2020-Feb	Landkreis Greiz	16076	0	0	0	0	0
2020-Feb	Landkreis Hildburghausen	16069	0	0	0	0	0
2020-Feb	Landkreis Ilm-Kreis	16070	0	0	0	0	0
2020-Feb	Landkreis Jena; Stadt	16053	0	0	0	0	0
2020-Feb	Landkreis Kyffhäuserkreis	16065	0	0	0	0	0
2020-Feb	Landkreis Nordhausen	16062	0	0	0	0	0
2020-Feb	Landkreis Saale-Holzland-Kreis	16074	0	0	0	0	0
2020-Feb	Landkreis Saale-Orla-Kreis	16075	0	0	0	0	0
2020-Feb	Landkreis Saalfeld-Rudolstadt	16073	0	0	0	0	0
2020-Feb	Landkreis Schmalkalden-Meiningen	16066	0	0	0	0	0
2020-Feb	Landkreis Sömmerda	16068	0	0	0	0	0
2020-Feb	Landkreis Sonneberg	16072	0	0	0	0	0
2020-Feb	Landkreis Suhl; Stadt	16054	0	0	0	0	0
2020-Feb	Landkreis Unstrut-Hainich-Kreis	16064	0	0	0	0	0
2020-Feb	Landkreis Wartburgkreis	16063	0	0	0	0	0
2020-Feb	Landkreis Weimarer Land	16071	0	0	0	0	0
2020-Feb	Landkreis Weimar; Stadt	16055	0	0	0	0	0
2020-Mar	Landkreis Altenburger Land	16077	0	0	0	0	0
2020-Mar	Landkreis Eichsfeld	16061	0	0	0	0	0
2020-Mar	Landkreis Eisenach; Stadt	16056	0	0	0	0	0
2020-Mar	Landkreis Erfurt; Stadt	16051	0	0	0	0	0
2020-Mar	Landkreis Gera; Stadt	16052	0	0	0	0	0
2020-Mar	Landkreis Gotha	16067	0	0	0	0	0
2020-Mar	Landkreis Greiz	16076	0	0	0	0	0
2020-Mar	Landkreis Hildburghausen	16069	0	0	0	0	0
2020-Mar	Landkreis Ilm-Kreis	16070	12	0	0	12	100
2020-Mar	Landkreis Jena; Stadt	16053	0	0	0	0	0
2020-Mar	Landkreis Kyffhäuserkreis	16065	0	0	0	0	0
2020-Mar	Landkreis Nordhausen	16062	0	0	0	0	0
2020-Mar	Landkreis Saale-Holzland-Kreis	16074	0	0	0	0	0
2020-Mar	Landkreis Saale-Orla-Kreis	16075	0	0	0	0	0
2020-Mar	Landkreis Saalfeld-Rudolstadt	16073	0	0	0	0	0
2020-Mar	Landkreis Schmalkalden-Meiningen	16066	0	0	0	0	0
2020-Mar	Landkreis Sömmerda	16068	0	0	0	0	0
2020-Mar	Landkreis Sonneberg	16072	0	0	0	0	0
2020-Mar	Landkreis Suhl; Stadt	16054	0	0	0	0	0
2020-Mar	Landkreis Unstrut-Hainich-Kreis	16064	0	0	0	0	0
2020-Mar	Landkreis Wartburgkreis	16063	0	0	0	0	0
2020-Mar	Landkreis Weimarer Land	16071	0	0	0	0	0
2020-Mar	Landkreis Weimar; Stadt	16055	0	0	0	0	0
2020-Apr	Landkreis Altenburger Land	16077	0	0	0	0	0
2020-Apr	Landkreis Eichsfeld	16061	0	0	0	0	0
2020-Apr	Landkreis Eisenach; Stadt	16056	0	0	0	0	0
2020-Apr	Landkreis Erfurt; Stadt	16051	0	0	0	0	0
2020-Apr	Landkreis Gera; Stadt	16052	0	0	0	0	0
2020-Apr	Landkreis Gotha	16067	1	0	0	1	100
2020-Apr	Landkreis Greiz	16076	0	0	0	0	0
2020-Apr	Landkreis Hildburghausen	16069	0	0	0	0	0
2020-Apr	Landkreis Ilm-Kreis	16070	26	0	0	26	100
2020-Apr	Landkreis Jena; Stadt	16053	4	0	0	4	100
2020-Apr	Landkreis Kyffhäuserkreis	16065	0	0	0	0	0
2020-Apr	Landkreis Nordhausen	16062	0	0	0	0	0
2020-Apr	Landkreis Saale-Holzland-Kreis	16074	1	0	0	1	100
2020-Apr	Landkreis Saale-Orla-Kreis	16075	1	0	0	1	100
2020-Apr	Landkreis Saalfeld-Rudolstadt	16073	1	0	0	1	100
2020-Apr	Landkreis Schmalkalden-Meiningen	16066	0	0	0	0	0
2020-Apr	Landkreis Sömmerda	16068	0	0	0	0	0
2020-Apr	Landkreis Sonneberg	16072	0	0	0	0	0
2020-Apr	Landkreis Suhl; Stadt	16054	0	0	0	0	0
2020-Apr	Landkreis Unstrut-Hainich-Kreis	16064	0	0	0	0	0
2020-Apr	Landkreis Wartburgkreis	16063	0	0	0	0	0
2020-Apr	Landkreis Weimarer Land	16071	0	0	0	0	0
2020-Apr	Landkreis Weimar; Stadt	16055	0	0	0	0	0
2020-May	Landkreis Altenburger Land	16077	0	0	0	0	0
2020-May	Landkreis Eichsfeld	16061	0	0	0	0	0
2020-May	Landkreis Eisenach; Stadt	16056	0	0	0	0	0
2020-May	Landkreis Erfurt; Stadt	16051	0	0	0	0	0
2020-May	Landkreis Gera; Stadt	16052	1	0	0	1	100
2020-May	Landkreis Gotha	16067	0	0	0	0	0
2020-May	Landkreis Greiz	16076	2	0	0	2	100
2020-May	Landkreis Hildburghausen	16069	0	0	0	0	0
2020-May	Landkreis Ilm-Kreis	16070	2	0	0	2	100
2020-May	Landkreis Jena; Stadt	16053	1	0	0	1	100
2020-May	Landkreis Kyffhäuserkreis	16065	0	0	0	0	0
2020-May	Landkreis Nordhausen	16062	0	0	0	0	0
2020-May	Landkreis Saale-Holzland-Kreis	16074	2	0	0	2	100
2020-May	Landkreis Saale-Orla-Kreis	16075	1	0	0	1	100
2020-May	Landkreis Saalfeld-Rudolstadt	16073	0	0	0	0	0
2020-May	Landkreis Schmalkalden-Meiningen	16066	0	0	0	0	0
2020-May	Landkreis Sömmerda	16068	0	0	0	0	0
2020-May	Landkreis Sonneberg	16072	0	0	0	0	0
2020-May	Landkreis Suhl; Stadt	16054	0	0	0	0	0
2020-May	Landkreis Unstrut-Hainich-Kreis	16064	0	0	0	0	0
2020-May	Landkreis Wartburgkreis	16063	0	0	0	0	0
2020-May	Landkreis Weimarer Land	16071	0	0	0	0	0
2020-May	Landkreis Weimar; Stadt	16055	0	0	0	0	0
2020-Jun	Landkreis Altenburger Land	16077	0	0	0	0	0
2020-Jun	Landkreis Eichsfeld	16061	0	0	0	0	0
2020-Jun	Landkreis Eisenach; Stadt	16056	0	0	0	0	0
2020-Jun	Landkreis Erfurt; Stadt	16051	0	0	0	0	0
2020-Jun	Landkreis Gera; Stadt	16052	0	0	0	0	0
2020-Jun	Landkreis Gotha	16067	0	0	0	0	0
2020-Jun	Landkreis Greiz	16076	0	0	0	0	0
2020-Jun	Landkreis Hildburghausen	16069	0	0	0	0	0
2020-Jun	Landkreis Ilm-Kreis	16070	0	0	0	0	0
2020-Jun	Landkreis Jena; Stadt	16053	0	0	0	0	0
2020-Jun	Landkreis Kyffhäuserkreis	16065	0	0	0	0	0
2020-Jun	Landkreis Nordhausen	16062	0	0	0	0	0
2020-Jun	Landkreis Saale-Holzland-Kreis	16074	0	0	0	0	0
2020-Jun	Landkreis Saale-Orla-Kreis	16075	0	0	0	0	0
2020-Jun	Landkreis Saalfeld-Rudolstadt	16073	0	0	0	0	0
2020-Jun	Landkreis Schmalkalden-Meiningen	16066	0	0	0	0	0
2020-Jun	Landkreis Sömmerda	16068	0	0	0	0	0
2020-Jun	Landkreis Sonneberg	16072	0	0	0	0	0
2020-Jun	Landkreis Suhl; Stadt	16054	0	0	0	0	0
2020-Jun	Landkreis Unstrut-Hainich-Kreis	16064	0	0	0	0	0
2020-Jun	Landkreis Wartburgkreis	16063	0	0	0	0	0
2020-Jun	Landkreis Weimarer Land	16071	0	0	0	0	0
2020-Jun	Landkreis Weimar; Stadt	16055	0	0	0	0	0
2020-Jul	Landkreis Altenburger Land	16077	0	0	0	0	0
2020-Jul	Landkreis Eichsfeld	16061	0	0	0	0	0
2020-Jul	Landkreis Eisenach; Stadt	16056	0	0	0	0	0
2020-Jul	Landkreis Erfurt; Stadt	16051	0	0	0	0	0
2020-Jul	Landkreis Gera; Stadt	16052	0	0	0	0	0
2020-Jul	Landkreis Gotha	16067	0	0	0	0	0
2020-Jul	Landkreis Greiz	16076	0	0	0	0	0
2020-Jul	Landkreis Hildburghausen	16069	0	0	0	0	0
2020-Jul	Landkreis Ilm-Kreis	16070	0	0	0	0	0
2020-Jul	Landkreis Jena; Stadt	16053	0	0	0	0	0
2020-Jul	Landkreis Kyffhäuserkreis	16065	0	0	0	0	0
2020-Jul	Landkreis Nordhausen	16062	0	0	0	0	0
2020-Jul	Landkreis Saale-Holzland-Kreis	16074	0	0	0	0	0
2020-Jul	Landkreis Saale-Orla-Kreis	16075	0	0	0	0	0
2020-Jul	Landkreis Saalfeld-Rudolstadt	16073	0	0	0	0	0
2020-Jul	Landkreis Schmalkalden-Meiningen	16066	0	0	0	0	0
2020-Jul	Landkreis Sömmerda	16068	0	0	0	0	0
2020-Jul	Landkreis Sonneberg	16072	0	0	0	0	0
2020-Jul	Landkreis Suhl; Stadt	16054	0	0	0	0	0
2020-Jul	Landkreis Unstrut-Hainich-Kreis	16064	0	0	0	0	0
2020-Jul	Landkreis Wartburgkreis	16063	0	0	0	0	0
2020-Jul	Landkreis Weimarer Land	16071	0	0	0	0	0
2020-Jul	Landkreis Weimar; Stadt	16055	0	0	0	0	0
2020-Aug	Landkreis Altenburger Land	16077	0	0	0	0	0
2020-Aug	Landkreis Eichsfeld	16061	0	0	0	0	0
2020-Aug	Landkreis Eisenach; Stadt	16056	0	0	0	0	0
2020-Aug	Landkreis Erfurt; Stadt	16051	0	0	0	0	0
2020-Aug	Landkreis Gera; Stadt	16052	0	0	0	0	0
2020-Aug	Landkreis Gotha	16067	0	0	0	0	0
2020-Aug	Landkreis Greiz	16076	0	0	0	0	0
2020-Aug	Landkreis Hildburghausen	16069	0	0	0	0	0
2020-Aug	Landkreis Ilm-Kreis	16070	0	0	0	0	0
2020-Aug	Landkreis Jena; Stadt	16053	1	0	0	1	100
2020-Aug	Landkreis Kyffhäuserkreis	16065	0	0	0	0	0
2020-Aug	Landkreis Nordhausen	16062	0	0	0	0	0
2020-Aug	Landkreis Saale-Holzland-Kreis	16074	0	0	0	0	0
2020-Aug	Landkreis Saale-Orla-Kreis	16075	0	0	0	0	0
2020-Aug	Landkreis Saalfeld-Rudolstadt	16073	0	0	0	0	0
2020-Aug	Landkreis Schmalkalden-Meiningen	16066	0	0	0	0	0
2020-Aug	Landkreis Sömmerda	16068	0	0	0	0	0
2020-Aug	Landkreis Sonneberg	16072	0	0	0	0	0
2020-Aug	Landkreis Suhl; Stadt	16054	0	0	0	0	0
2020-Aug	Landkreis Unstrut-Hainich-Kreis	16064	0	0	0	0	0
2020-Aug	Landkreis Wartburgkreis	16063	0	0	0	0	0
2020-Aug	Landkreis Weimarer Land	16071	0	0	0	0	0
2020-Aug	Landkreis Weimar; Stadt	16055	0	0	0	0	0
2020-Sep	Landkreis Altenburger Land	16077	0	0	0	0	0
2020-Sep	Landkreis Eichsfeld	16061	0	0	0	0	0
2020-Sep	Landkreis Eisenach; Stadt	16056	0	0	0	0	0
2020-Sep	Landkreis Erfurt; Stadt	16051	0	0	0	0	0
2020-Sep	Landkreis Gera; Stadt	16052	0	0	0	0	0
2020-Sep	Landkreis Gotha	16067	0	0	0	0	0
2020-Sep	Landkreis Greiz	16076	0	0	0	0	0
2020-Sep	Landkreis Hildburghausen	16069	0	0	0	0	0
2020-Sep	Landkreis Ilm-Kreis	16070	0	0	0	0	0
2020-Sep	Landkreis Jena; Stadt	16053	0	0	0	0	0
2020-Sep	Landkreis Kyffhäuserkreis	16065	0	0	0	0	0
2020-Sep	Landkreis Nordhausen	16062	0	0	0	0	0
2020-Sep	Landkreis Saale-Holzland-Kreis	16074	0	0	0	0	0
2020-Sep	Landkreis Saale-Orla-Kreis	16075	0	0	0	0	0
2020-Sep	Landkreis Saalfeld-Rudolstadt	16073	0	0	0	0	0
2020-Sep	Landkreis Schmalkalden-Meiningen	16066	0	0	0	0	0
2020-Sep	Landkreis Sömmerda	16068	0	0	0	0	0
2020-Sep	Landkreis Sonneberg	16072	0	0	0	0	0
2020-Sep	Landkreis Suhl; Stadt	16054	0	0	0	0	0
2020-Sep	Landkreis Unstrut-Hainich-Kreis	16064	0	0	0	0	0
2020-Sep	Landkreis Wartburgkreis	16063	0	0	0	0	0
2020-Sep	Landkreis Weimarer Land	16071	0	0	0	0	0
2020-Sep	Landkreis Weimar; Stadt	16055	0	0	0	0	0
2020-Oct	Landkreis Altenburger Land	16077	0	0	0	0	0
2020-Oct	Landkreis Eichsfeld	16061	0	0	0	0	0
2020-Oct	Landkreis Eisenach; Stadt	16056	0	0	0	0	0
2020-Oct	Landkreis Erfurt; Stadt	16051	0	0	0	0	0
2020-Oct	Landkreis Gera; Stadt	16052	0	0	0	0	0
2020-Oct	Landkreis Gotha	16067	0	0	0	0	0
2020-Oct	Landkreis Greiz	16076	0	0	0	0	0
2020-Oct	Landkreis Hildburghausen	16069	0	0	0	0	0
2020-Oct	Landkreis Ilm-Kreis	16070	0	0	0	0	0
2020-Oct	Landkreis Jena; Stadt	16053	0	0	0	0	0
2020-Oct	Landkreis Kyffhäuserkreis	16065	0	0	0	0	0
2020-Oct	Landkreis Nordhausen	16062	0	0	0	0	0
2020-Oct	Landkreis Saale-Holzland-Kreis	16074	0	0	0	0	0
2020-Oct	Landkreis Saale-Orla-Kreis	16075	0	0	0	0	0
2020-Oct	Landkreis Saalfeld-Rudolstadt	16073	0	0	0	0	0
2020-Oct	Landkreis Schmalkalden-Meiningen	16066	0	0	0	0	0
2020-Oct	Landkreis Sömmerda	16068	0	0	0	0	0
2020-Oct	Landkreis Sonneberg	16072	0	0	0	0	0
2020-Oct	Landkreis Suhl; Stadt	16054	0	0	0	0	0
2020-Oct	Landkreis Unstrut-Hainich-Kreis	16064	0	0	0	0	0
2020-Oct	Landkreis Wartburgkreis	16063	0	0	0	0	0
2020-Oct	Landkreis Weimarer Land	16071	0	0	0	0	0
2020-Oct	Landkreis Weimar; Stadt	16055	0	0	0	0	0
2020-Nov	Landkreis Altenburger Land	16077	0	0	0	0	0
2020-Nov	Landkreis Eichsfeld	16061	0	0	0	0	0
2020-Nov	Landkreis Eisenach; Stadt	16056	0	0	0	0	0
2020-Nov	Landkreis Erfurt; Stadt	16051	0	0	0	0	0
2020-Nov	Landkreis Gera; Stadt	16052	0	0	0	0	0
2020-Nov	Landkreis Gotha	16067	0	0	0	0	0
2020-Nov	Landkreis Greiz	16076	0	0	0	0	0
2020-Nov	Landkreis Hildburghausen	16069	0	0	0	0	0
2020-Nov	Landkreis Ilm-Kreis	16070	2	0	0	2	100
2020-Nov	Landkreis Jena; Stadt	16053	1	0	0	1	100
2020-Nov	Landkreis Kyffhäuserkreis	16065	0	0	0	0	0
2020-Nov	Landkreis Nordhausen	16062	0	0	0	0	0
2020-Nov	Landkreis Saale-Holzland-Kreis	16074	0	0	0	0	0
2020-Nov	Landkreis Saale-Orla-Kreis	16075	0	0	0	0	0
2020-Nov	Landkreis Saalfeld-Rudolstadt	16073	0	0	0	0	0
2020-Nov	Landkreis Schmalkalden-Meiningen	16066	0	0	0	0	0
2020-Nov	Landkreis Sömmerda	16068	0	0	0	0	0
2020-Nov	Landkreis Sonneberg	16072	0	0	0	0	0
2020-Nov	Landkreis Suhl; Stadt	16054	0	0	0	0	0
2020-Nov	Landkreis Unstrut-Hainich-Kreis	16064	0	0	0	0	0
2020-Nov	Landkreis Wartburgkreis	16063	0	0	0	0	0
2020-Nov	Landkreis Weimarer Land	16071	0	0	0	0	0
2020-Nov	Landkreis Weimar; Stadt	16055	0	0	0	0	0
2020-Dec-1st-half	Landkreis Altenburger Land	16077	1	0	0	1	100
2020-Dec-1st-half	Landkreis Eichsfeld	16061	0	0	0	0	0
2020-Dec-1st-half	Landkreis Eisenach; Stadt	16056	0	0	0	0	0
2020-Dec-1st-half	Landkreis Erfurt; Stadt	16051	0	0	0	0	0
2020-Dec-1st-half	Landkreis Gera; Stadt	16052	0	0	0	0	0
2020-Dec-1st-half	Landkreis Gotha	16067	0	0	0	0	0
2020-Dec-1st-half	Landkreis Greiz	16076	0	0	0	0	0
2020-Dec-1st-half	Landkreis Hildburghausen	16069	1	0	0	1	100
2020-Dec-1st-half	Landkreis Ilm-Kreis	16070	1	0	0	1	100
2020-Dec-1st-half	Landkreis Jena; Stadt	16053	10	0	0	10	100
2020-Dec-1st-half	Landkreis Kyffhäuserkreis	16065	0	0	0	0	0
2020-Dec-1st-half	Landkreis Nordhausen	16062	0	0	0	0	0
2020-Dec-1st-half	Landkreis Saale-Holzland-Kreis	16074	0	0	0	0	0
2020-Dec-1st-half	Landkreis Saale-Orla-Kreis	16075	0	0	0	0	0
2020-Dec-1st-half	Landkreis Saalfeld-Rudolstadt	16073	1	0	0	1	100
2020-Dec-1st-half	Landkreis Schmalkalden-Meiningen	16066	0	0	0	0	0
2020-Dec-1st-half	Landkreis Sömmerda	16068	1	0	0	1	100
2020-Dec-1st-half	Landkreis Sonneberg	16072	0	0	0	0	0
2020-Dec-1st-half	Landkreis Suhl; Stadt	16054	0	0	0	0	0
2020-Dec-1st-half	Landkreis Unstrut-Hainich-Kreis	16064	0	0	0	0	0
2020-Dec-1st-half	Landkreis Wartburgkreis	16063	0	0	0	0	0
2020-Dec-1st-half	Landkreis Weimarer Land	16071	0	0	0	0	0
2020-Dec-1st-half	Landkreis Weimar; Stadt	16055	0	0	0	0	0
2020-Dec-2nd-half	Landkreis Altenburger Land	16077	0	0	0	0	0
2020-Dec-2nd-half	Landkreis Eichsfeld	16061	0	0	0	0	0
2020-Dec-2nd-half	Landkreis Eisenach; Stadt	16056	0	0	0	0	0
2020-Dec-2nd-half	Landkreis Erfurt; Stadt	16051	0	0	0	0	0
2020-Dec-2nd-half	Landkreis Gera; Stadt	16052	0	0	0	0	0
2020-Dec-2nd-half	Landkreis Gotha	16067	0	0	0	0	0
2020-Dec-2nd-half	Landkreis Greiz	16076	0	0	0	0	0
2020-Dec-2nd-half	Landkreis Hildburghausen	16069	0	0	0	0	0
2020-Dec-2nd-half	Landkreis Ilm-Kreis	16070	6	0	0	6	100
2020-Dec-2nd-half	Landkreis Jena; Stadt	16053	0	0	0	0	0
2020-Dec-2nd-half	Landkreis Kyffhäuserkreis	16065	0	0	0	0	0
2020-Dec-2nd-half	Landkreis Nordhausen	16062	0	0	0	0	0
2020-Dec-2nd-half	Landkreis Saale-Holzland-Kreis	16074	0	0	0	0	0
2020-Dec-2nd-half	Landkreis Saale-Orla-Kreis	16075	0	0	0	0	0
2020-Dec-2nd-half	Landkreis Saalfeld-Rudolstadt	16073	0	0	0	0	0
2020-Dec-2nd-half	Landkreis Schmalkalden-Meiningen	16066	0	0	0	0	0
2020-Dec-2nd-half	Landkreis Sömmerda	16068	0	0	0	0	0
2020-Dec-2nd-half	Landkreis Sonneberg	16072	0	0	0	0	0
2020-Dec-2nd-half	Landkreis Suhl; Stadt	16054	0	0	0	0	0
2020-Dec-2nd-half	Landkreis Unstrut-Hainich-Kreis	16064	0	0	0	0	0
2020-Dec-2nd-half	Landkreis Wartburgkreis	16063	0	0	0	0	0
2020-Dec-2nd-half	Landkreis Weimarer Land	16071	0	0	0	0	0
2020-Dec-2nd-half	Landkreis Weimar; Stadt	16055	0	0	0	0	0
2021-Jan-1st-half	Landkreis Altenburger Land	16077	0	0	0	0	0
2021-Jan-1st-half	Landkreis Eichsfeld	16061	0	0	0	0	0
2021-Jan-1st-half	Landkreis Eisenach; Stadt	16056	0	0	0	0	0
2021-Jan-1st-half	Landkreis Erfurt; Stadt	16051	0	0	0	0	0
2021-Jan-1st-half	Landkreis Gera; Stadt	16052	0	0	0	0	0
2021-Jan-1st-half	Landkreis Gotha	16067	0	0	0	0	0
2021-Jan-1st-half	Landkreis Greiz	16076	0	0	0	0	0
2021-Jan-1st-half	Landkreis Hildburghausen	16069	3	0	0	3	100
2021-Jan-1st-half	Landkreis Ilm-Kreis	16070	11	0	0	11	100
2021-Jan-1st-half	Landkreis Jena; Stadt	16053	6	0	0	6	100
2021-Jan-1st-half	Landkreis Kyffhäuserkreis	16065	0	0	0	0	0
2021-Jan-1st-half	Landkreis Nordhausen	16062	0	0	0	0	0
2021-Jan-1st-half	Landkreis Saale-Holzland-Kreis	16074	1	0	0	1	100
2021-Jan-1st-half	Landkreis Saale-Orla-Kreis	16075	0	0	0	0	0
2021-Jan-1st-half	Landkreis Saalfeld-Rudolstadt	16073	0	0	0	0	0
2021-Jan-1st-half	Landkreis Schmalkalden-Meiningen	16066	1	0	0	1	100
2021-Jan-1st-half	Landkreis Sömmerda	16068	0	0	0	0	0
2021-Jan-1st-half	Landkreis Sonneberg	16072	0	0	0	0	0
2021-Jan-1st-half	Landkreis Suhl; Stadt	16054	0	0	0	0	0
2021-Jan-1st-half	Landkreis Unstrut-Hainich-Kreis	16064	0	0	0	0	0
2021-Jan-1st-half	Landkreis Wartburgkreis	16063	0	0	0	0	0
2021-Jan-1st-half	Landkreis Weimarer Land	16071	1	0	0	1	100
2021-Jan-1st-half	Landkreis Weimar; Stadt	16055	2	0	0	2	100
2021-Jan-2nd-half	Landkreis Altenburger Land	16077	3	0	0	3	100
2021-Jan-2nd-half	Landkreis Eichsfeld	16061	0	0	0	0	0
2021-Jan-2nd-half	Landkreis Eisenach; Stadt	16056	2	0	0	2	100
2021-Jan-2nd-half	Landkreis Erfurt; Stadt	16051	0	0	0	0	0
2021-Jan-2nd-half	Landkreis Gera; Stadt	16052	4	0	0	4	100
2021-Jan-2nd-half	Landkreis Gotha	16067	0	0	0	0	0
2021-Jan-2nd-half	Landkreis Greiz	16076	3	0	0	3	100
2021-Jan-2nd-half	Landkreis Hildburghausen	16069	5	0	0	5	100
2021-Jan-2nd-half	Landkreis Ilm-Kreis	16070	4	0	0	4	100
2021-Jan-2nd-half	Landkreis Jena; Stadt	16053	15	0	0	15	100
2021-Jan-2nd-half	Landkreis Kyffhäuserkreis	16065	1	0	0	1	100
2021-Jan-2nd-half	Landkreis Nordhausen	16062	0	0	0	0	0
2021-Jan-2nd-half	Landkreis Saale-Holzland-Kreis	16074	1	0	0	1	100
2021-Jan-2nd-half	Landkreis Saale-Orla-Kreis	16075	9	1	11.1111	8	88.8889
2021-Jan-2nd-half	Landkreis Saalfeld-Rudolstadt	16073	3	0	0	3	100
2021-Jan-2nd-half	Landkreis Schmalkalden-Meiningen	16066	3	1	33.3333	2	66.6667
2021-Jan-2nd-half	Landkreis Sömmerda	16068	6	0	0	6	100
2021-Jan-2nd-half	Landkreis Sonneberg	16072	1	0	0	1	100
2021-Jan-2nd-half	Landkreis Suhl; Stadt	16054	1	0	0	1	100
2021-Jan-2nd-half	Landkreis Unstrut-Hainich-Kreis	16064	2	0	0	2	100
2021-Jan-2nd-half	Landkreis Wartburgkreis	16063	3	0	0	3	100
2021-Jan-2nd-half	Landkreis Weimarer Land	16071	2	0	0	2	100
2021-Jan-2nd-half	Landkreis Weimar; Stadt	16055	7	0	0	7	100
2021-Feb	Landkreis Altenburger Land	16077	23	5	21.7391	18	78.2609
2021-Feb	Landkreis Eichsfeld	16061	29	22	75.8621	7	24.1379
2021-Feb	Landkreis Eisenach; Stadt	16056	10	4	40	6	60
2021-Feb	Landkreis Erfurt; Stadt	16051	19	15	78.9474	4	21.0526
2021-Feb	Landkreis Gera; Stadt	16052	18	9	50	9	50
2021-Feb	Landkreis Gotha	16067	80	62	77.5	18	22.5
2021-Feb	Landkreis Greiz	16076	40	24	60	16	40
2021-Feb	Landkreis Hildburghausen	16069	17	3	17.6471	14	82.3529
2021-Feb	Landkreis Ilm-Kreis	16070	30	17	56.6667	13	43.3333
2021-Feb	Landkreis Jena; Stadt	16053	57	18	31.5789	39	68.4211
2021-Feb	Landkreis Kyffhäuserkreis	16065	36	3	8.33333	33	91.6667
2021-Feb	Landkreis Nordhausen	16062	10	7	70	3	30
2021-Feb	Landkreis Saale-Holzland-Kreis	16074	38	12	31.5789	26	68.4211
2021-Feb	Landkreis Saale-Orla-Kreis	16075	52	23	44.2308	29	55.7692
2021-Feb	Landkreis Saalfeld-Rudolstadt	16073	44	25	56.8182	19	43.1818
2021-Feb	Landkreis Schmalkalden-Meiningen	16066	23	9	39.1304	14	60.8696
2021-Feb	Landkreis Sömmerda	16068	49	39	79.5918	10	20.4082
2021-Feb	Landkreis Sonneberg	16072	4	2	50	2	50
2021-Feb	Landkreis Suhl; Stadt	16054	1	0	0	1	100
2021-Feb	Landkreis Unstrut-Hainich-Kreis	16064	47	30	63.8298	17	36.1702
2021-Feb	Landkreis Wartburgkreis	16063	16	7	43.75	9	56.25
2021-Feb	Landkreis Weimarer Land	16071	21	12	57.1429	9	42.8571
2021-Feb	Landkreis Weimar; Stadt	16055	28	12	42.8571	16	57.1429
2021-Mar	Landkreis Altenburger Land	16077	152	112	73.6842	40	26.3158
2021-Mar	Landkreis Eichsfeld	16061	140	135	96.4286	5	3.57143
2021-Mar	Landkreis Eisenach; Stadt	16056	25	21	84	4	16
2021-Mar	Landkreis Erfurt; Stadt	16051	86	82	95.3488	4	4.65116
2021-Mar	Landkreis Gera; Stadt	16052	139	133	95.6835	6	4.31655
2021-Mar	Landkreis Gotha	16067	459	448	97.6035	11	2.39651
2021-Mar	Landkreis Greiz	16076	214	199	92.9907	15	7.00935
2021-Mar	Landkreis Hildburghausen	16069	9	3	33.3333	6	66.6667
2021-Mar	Landkreis Ilm-Kreis	16070	393	373	94.9109	20	5.08906
2021-Mar	Landkreis Jena; Stadt	16053	115	94	81.7391	21	18.2609
2021-Mar	Landkreis Kyffhäuserkreis	16065	100	67	67	33	33
2021-Mar	Landkreis Nordhausen	16062	26	22	84.6154	4	15.3846
2021-Mar	Landkreis Saale-Holzland-Kreis	16074	136	128	94.1176	8	5.88235
2021-Mar	Landkreis Saale-Orla-Kreis	16075	70	61	87.1429	9	12.8571
2021-Mar	Landkreis Saalfeld-Rudolstadt	16073	19	8	42.1053	11	57.8947
2021-Mar	Landkreis Schmalkalden-Meiningen	16066	22	15	68.1818	7	31.8182
2021-Mar	Landkreis Sömmerda	16068	68	58	85.2941	10	14.7059
2021-Mar	Landkreis Sonneberg	16072	4	3	75	1	25
2021-Mar	Landkreis Suhl; Stadt	16054	5	3	60	2	40
2021-Mar	Landkreis Unstrut-Hainich-Kreis	16064	152	138	90.7895	14	9.21053
2021-Mar	Landkreis Wartburgkreis	16063	57	53	92.9825	4	7.01754
2021-Mar	Landkreis Weimarer Land	16071	32	22	68.75	10	31.25
2021-Mar	Landkreis Weimar; Stadt	16055	77	72	93.5065	5	6.49351
2021-Apr	Landkreis Altenburger Land	16077	78	66	84.6154	12	15.3846
2021-Apr	Landkreis Eichsfeld	16061	167	166	99.4012	1	0.598802
2021-Apr	Landkreis Eisenach; Stadt	16056	11	8	72.7273	3	27.2727
2021-Apr	Landkreis Erfurt; Stadt	16051	141	138	97.8723	3	2.12766
2021-Apr	Landkreis Gera; Stadt	16052	191	184	96.3351	7	3.66492
2021-Apr	Landkreis Gotha	16067	476	474	99.5798	2	0.420168
2021-Apr	Landkreis Greiz	16076	141	136	96.4539	5	3.5461
2021-Apr	Landkreis Hildburghausen	16069	7	7	100	0	0
2021-Apr	Landkreis Ilm-Kreis	16070	592	584	98.6486	8	1.35135
2021-Apr	Landkreis Jena; Stadt	16053	135	132	97.7778	3	2.22222
2021-Apr	Landkreis Kyffhäuserkreis	16065	116	104	89.6552	12	10.3448
2021-Apr	Landkreis Nordhausen	16062	14	11	78.5714	3	21.4286
2021-Apr	Landkreis Saale-Holzland-Kreis	16074	199	196	98.4925	3	1.50754
2021-Apr	Landkreis Saale-Orla-Kreis	16075	54	54	100	0	0
2021-Apr	Landkreis Saalfeld-Rudolstadt	16073	29	26	89.6552	3	10.3448
2021-Apr	Landkreis Schmalkalden-Meiningen	16066	9	8	88.8889	1	11.1111
2021-Apr	Landkreis Sömmerda	16068	157	155	98.7261	2	1.27389
2021-Apr	Landkreis Sonneberg	16072	10	10	100	0	0
2021-Apr	Landkreis Suhl; Stadt	16054	8	8	100	0	0
2021-Apr	Landkreis Unstrut-Hainich-Kreis	16064	152	145	95.3947	7	4.60526
2021-Apr	Landkreis Wartburgkreis	16063	80	79	98.75	1	1.25
2021-Apr	Landkreis Weimarer Land	16071	37	37	100	0	0
2021-Apr	Landkreis Weimar; Stadt	16055	203	199	98.0296	4	1.97044
2021-May	Landkreis Altenburger Land	16077	12	3	25	9	75
2021-May	Landkreis Eichsfeld	16061	44	44	100	0	0
2021-May	Landkreis Eisenach; Stadt	16056	8	6	75	2	25
2021-May	Landkreis Erfurt; Stadt	16051	10	10	100	0	0
2021-May	Landkreis Gera; Stadt	16052	35	33	94.2857	2	5.71429
2021-May	Landkreis Gotha	16067	80	80	100	0	0
2021-May	Landkreis Greiz	16076	31	30	96.7742	1	3.22581
2021-May	Landkreis Hildburghausen	16069	26	26	100	0	0
2021-May	Landkreis Ilm-Kreis	16070	108	106	98.1481	2	1.85185
2021-May	Landkreis Jena; Stadt	16053	41	37	90.2439	4	9.7561
2021-May	Landkreis Kyffhäuserkreis	16065	22	21	95.4545	1	4.54545
2021-May	Landkreis Nordhausen	16062	14	14	100	0	0
2021-May	Landkreis Saale-Holzland-Kreis	16074	61	61	100	0	0
2021-May	Landkreis Saale-Orla-Kreis	16075	20	19	95	1	5
2021-May	Landkreis Saalfeld-Rudolstadt	16073	9	9	100	0	0
2021-May	Landkreis Schmalkalden-Meiningen	16066	6	5	83.3333	1	16.6667
2021-May	Landkreis Sömmerda	16068	37	36	97.2973	1	2.7027
2021-May	Landkreis Sonneberg	16072	24	24	100	0	0
2021-May	Landkreis Suhl; Stadt	16054	0	0	0	0	0
2021-May	Landkreis Unstrut-Hainich-Kreis	16064	94	77	81.9149	17	18.0851
2021-May	Landkreis Wartburgkreis	16063	59	58	98.3051	1	1.69492
2021-May	Landkreis Weimarer Land	16071	14	14	100	0	0
2021-May	Landkreis Weimar; Stadt	16055	36	35	97.2222	1	2.77778
2021-Jun	Landkreis Altenburger Land	16077	0	0	0	0	0
2021-Jun	Landkreis Eichsfeld	16061	0	0	0	0	0
2021-Jun	Landkreis Eisenach; Stadt	16056	0	0	0	0	0
2021-Jun	Landkreis Erfurt; Stadt	16051	0	0	0	0	0
2021-Jun	Landkreis Gera; Stadt	16052	0	0	0	0	0
2021-Jun	Landkreis Gotha	16067	1	0	0	1	100
2021-Jun	Landkreis Greiz	16076	0	0	0	0	0
2021-Jun	Landkreis Hildburghausen	16069	0	0	0	0	0
2021-Jun	Landkreis Ilm-Kreis	16070	1	0	0	1	100
2021-Jun	Landkreis Jena; Stadt	16053	1	0	0	1	100
2021-Jun	Landkreis Kyffhäuserkreis	16065	3	1	33.3333	2	66.6667
2021-Jun	Landkreis Nordhausen	16062	0	0	0	0	0
2021-Jun	Landkreis Saale-Holzland-Kreis	16074	0	0	0	0	0
2021-Jun	Landkreis Saale-Orla-Kreis	16075	0	0	0	0	0
2021-Jun	Landkreis Saalfeld-Rudolstadt	16073	0	0	0	0	0
2021-Jun	Landkreis Schmalkalden-Meiningen	16066	2	0	0	2	100
2021-Jun	Landkreis Sömmerda	16068	0	0	0	0	0
2021-Jun	Landkreis Sonneberg	16072	0	0	0	0	0
2021-Jun	Landkreis Suhl; Stadt	16054	0	0	0	0	0
2021-Jun	Landkreis Unstrut-Hainich-Kreis	16064	27	12	44.4444	15	55.5556
2021-Jun	Landkreis Wartburgkreis	16063	7	6	85.7143	1	14.2857
2021-Jun	Landkreis Weimarer Land	16071	0	0	0	0	0
2021-Jun	Landkreis Weimar; Stadt	16055	0	0	0	0	0
2021-Jul	Landkreis Altenburger Land	16077	0	0	0	0	0
2021-Jul	Landkreis Eichsfeld	16061	1	1	100	0	0
2021-Jul	Landkreis Eisenach; Stadt	16056	0	0	0	0	0
2021-Jul	Landkreis Erfurt; Stadt	16051	1	0	0	1	100
2021-Jul	Landkreis Gera; Stadt	16052	0	0	0	0	0
2021-Jul	Landkreis Gotha	16067	0	0	0	0	0
2021-Jul	Landkreis Greiz	16076	0	0	0	0	0
2021-Jul	Landkreis Hildburghausen	16069	0	0	0	0	0
2021-Jul	Landkreis Ilm-Kreis	16070	0	0	0	0	0
2021-Jul	Landkreis Jena; Stadt	16053	5	0	0	5	100
2021-Jul	Landkreis Kyffhäuserkreis	16065	0	0	0	0	0
2021-Jul	Landkreis Nordhausen	16062	1	0	0	1	100
2021-Jul	Landkreis Saale-Holzland-Kreis	16074	0	0	0	0	0
2021-Jul	Landkreis Saale-Orla-Kreis	16075	0	0	0	0	0
2021-Jul	Landkreis Saalfeld-Rudolstadt	16073	0	0	0	0	0
2021-Jul	Landkreis Schmalkalden-Meiningen	16066	0	0	0	0	0
2021-Jul	Landkreis Sömmerda	16068	0	0	0	0	0
2021-Jul	Landkreis Sonneberg	16072	1	0	0	1	100
2021-Jul	Landkreis Suhl; Stadt	16054	1	0	0	1	100
2021-Jul	Landkreis Unstrut-Hainich-Kreis	16064	1	0	0	1	100
2021-Jul	Landkreis Wartburgkreis	16063	0	0	0	0	0
2021-Jul	Landkreis Weimarer Land	16071	0	0	0	0	0
2021-Jul	Landkreis Weimar; Stadt	16055	0	0	0	0	0
2021-Aug	Landkreis Altenburger Land	16077	0	0	0	0	0
2021-Aug	Landkreis Eichsfeld	16061	1	0	0	1	100
2021-Aug	Landkreis Eisenach; Stadt	16056	1	0	0	1	100
2021-Aug	Landkreis Erfurt; Stadt	16051	13	0	0	13	100
2021-Aug	Landkreis Gera; Stadt	16052	0	0	0	0	0
2021-Aug	Landkreis Gotha	16067	0	0	0	0	0
2021-Aug	Landkreis Greiz	16076	0	0	0	0	0
2021-Aug	Landkreis Hildburghausen	16069	0	0	0	0	0
2021-Aug	Landkreis Ilm-Kreis	16070	0	0	0	0	0
2021-Aug	Landkreis Jena; Stadt	16053	10	0	0	10	100
2021-Aug	Landkreis Kyffhäuserkreis	16065	2	0	0	2	100
2021-Aug	Landkreis Nordhausen	16062	1	0	0	1	100
2021-Aug	Landkreis Saale-Holzland-Kreis	16074	1	0	0	1	100
2021-Aug	Landkreis Saale-Orla-Kreis	16075	0	0	0	0	0
2021-Aug	Landkreis Saalfeld-Rudolstadt	16073	0	0	0	0	0
2021-Aug	Landkreis Schmalkalden-Meiningen	16066	0	0	0	0	0
2021-Aug	Landkreis Sömmerda	16068	10	0	0	10	100
2021-Aug	Landkreis Sonneberg	16072	3	0	0	3	100
2021-Aug	Landkreis Suhl; Stadt	16054	0	0	0	0	0
2021-Aug	Landkreis Unstrut-Hainich-Kreis	16064	4	0	0	4	100
2021-Aug	Landkreis Wartburgkreis	16063	8	0	0	8	100
2021-Aug	Landkreis Weimarer Land	16071	0	0	0	0	0
2021-Aug	Landkreis Weimar; Stadt	16055	1	0	0	1	100
2021-Sep	Landkreis Altenburger Land	16077	0	0	0	0	0
2021-Sep	Landkreis Eichsfeld	16061	0	0	0	0	0
2021-Sep	Landkreis Eisenach; Stadt	16056	7	0	0	7	100
2021-Sep	Landkreis Erfurt; Stadt	16051	7	0	0	7	100
2021-Sep	Landkreis Gera; Stadt	16052	1	0	0	1	100
2021-Sep	Landkreis Gotha	16067	0	0	0	0	0
2021-Sep	Landkreis Greiz	16076	0	0	0	0	0
2021-Sep	Landkreis Hildburghausen	16069	2	0	0	2	100
2021-Sep	Landkreis Ilm-Kreis	16070	6	0	0	6	100
2021-Sep	Landkreis Jena; Stadt	16053	1	0	0	1	100
2021-Sep	Landkreis Kyffhäuserkreis	16065	1	0	0	1	100
2021-Sep	Landkreis Nordhausen	16062	0	0	0	0	0
2021-Sep	Landkreis Saale-Holzland-Kreis	16074	1	0	0	1	100
2021-Sep	Landkreis Saale-Orla-Kreis	16075	0	0	0	0	0
2021-Sep	Landkreis Saalfeld-Rudolstadt	16073	1	0	0	1	100
2021-Sep	Landkreis Schmalkalden-Meiningen	16066	1	0	0	1	100
2021-Sep	Landkreis Sömmerda	16068	30	0	0	30	100
2021-Sep	Landkreis Sonneberg	16072	1	0	0	1	100
2021-Sep	Landkreis Suhl; Stadt	16054	0	0	0	0	0
2021-Sep	Landkreis Unstrut-Hainich-Kreis	16064	35	0	0	35	100
2021-Sep	Landkreis Wartburgkreis	16063	20	0	0	20	100
2021-Sep	Landkreis Weimarer Land	16071	0	0	0	0	0
2021-Sep	Landkreis Weimar; Stadt	16055	2	0	0	2	100
