# Supplementary material for: Leveraging mobility data to analyze persistent SARS-CoV-2 mutations and inform targeted genomic surveillance
Source: eLife. 2025 Jan 15;13:RP94045. doi: 10.7554/eLife.94045 (PMC11735024; doi:10.7554/eLife.94045)
Supplement: Figure 2—source data 1. [file elife-94045-fig2-data1.xlsx]

## Sheet: Figure 2-source data 1
Kreis	cluster	month	infected	id
Erfurt	ORF1b:A520V	Feb	6	16051
Gera	ORF1b:A520V	Feb		16052
Jena	ORF1b:A520V	Feb		16053
Suhl	ORF1b:A520V	Feb		16054
Weimar	ORF1b:A520V	Feb		16055
Eisenach	ORF1b:A520V	Feb	1	16056
Eichsfeld	ORF1b:A520V	Feb		16061
Nordhausen	ORF1b:A520V	Feb		16062
Wartburgkreis	ORF1b:A520V	Feb	1	16063
Unstrut-Hainich-Kreis	ORF1b:A520V	Feb		16064
Kyffhaeuserkreis	ORF1b:A520V	Feb		16065
Schmalkalden-Meiningen	ORF1b:A520V	Feb		16066
Gotha	ORF1b:A520V	Feb	25	16067
Soemmerda	ORF1b:A520V	Feb	33	16068
Hildburghausen	ORF1b:A520V	Feb	2	16069
Ilm-Kreis	ORF1b:A520V	Feb	3	16070
Weimarer Land	ORF1b:A520V	Feb		16071
Sonneberg	ORF1b:A520V	Feb		16072
Saalfeld-Rudolstadt	ORF1b:A520V	Feb		16073
Saale-Holzland-Kreis	ORF1b:A520V	Feb		16074
Saale-Orla-Kreis	ORF1b:A520V	Feb		16075
Greiz	ORF1b:A520V	Feb		16076
Altenburger Land	ORF1b:A520V	Feb		16077
Erfurt	ORF1b:A520V	Mar	30	16051
Gera	ORF1b:A520V	Mar		16052
Jena	ORF1b:A520V	Mar		16053
Suhl	ORF1b:A520V	Mar	3	16054
Weimar	ORF1b:A520V	Mar	11	16055
Eisenach	ORF1b:A520V	Mar	2	16056
Eichsfeld	ORF1b:A520V	Mar	1	16061
Nordhausen	ORF1b:A520V	Mar	4	16062
Wartburgkreis	ORF1b:A520V	Mar	5	16063
Unstrut-Hainich-Kreis	ORF1b:A520V	Mar	6	16064
Kyffhaeuserkreis	ORF1b:A520V	Mar	4	16065
Schmalkalden-Meiningen	ORF1b:A520V	Mar		16066
Gotha	ORF1b:A520V	Mar	151	16067
Soemmerda	ORF1b:A520V	Mar	72	16068
Hildburghausen	ORF1b:A520V	Mar	3	16069
Ilm-Kreis	ORF1b:A520V	Mar	26	16070
Weimarer Land	ORF1b:A520V	Mar	1	16071
Sonneberg	ORF1b:A520V	Mar		16072
Saalfeld-Rudolstadt	ORF1b:A520V	Mar		16073
Saale-Holzland-Kreis	ORF1b:A520V	Mar		16074
Saale-Orla-Kreis	ORF1b:A520V	Mar		16075
Greiz	ORF1b:A520V	Mar		16076
Altenburger Land	ORF1b:A520V	Mar		16077
Erfurt	ORF1b:A520V	Apr	52	16051
Gera	ORF1b:A520V	Apr	1	16052
Jena	ORF1b:A520V	Apr	6	16053
Suhl	ORF1b:A520V	Apr	3	16054
Weimar	ORF1b:A520V	Apr	43	16055
Eisenach	ORF1b:A520V	Apr	3	16056
Eichsfeld	ORF1b:A520V	Apr	3	16061
Nordhausen	ORF1b:A520V	Apr	4	16062
Wartburgkreis	ORF1b:A520V	Apr	9	16063
Unstrut-Hainich-Kreis	ORF1b:A520V	Apr	20	16064
Kyffhaeuserkreis	ORF1b:A520V	Apr	25	16065
Schmalkalden-Meiningen	ORF1b:A520V	Apr		16066
Gotha	ORF1b:A520V	Apr	288	16067
Soemmerda	ORF1b:A520V	Apr	144	16068
Hildburghausen	ORF1b:A520V	Apr	4	16069
Ilm-Kreis	ORF1b:A520V	Apr	79	16070
Weimarer Land	ORF1b:A520V	Apr	7	16071
Sonneberg	ORF1b:A520V	Apr		16072
Saalfeld-Rudolstadt	ORF1b:A520V	Apr	1	16073
Saale-Holzland-Kreis	ORF1b:A520V	Apr	3	16074
Saale-Orla-Kreis	ORF1b:A520V	Apr		16075
Greiz	ORF1b:A520V	Apr	1	16076
Altenburger Land	ORF1b:A520V	Apr		16077
Erfurt	ORF1b:A520V	May	55	16051
Gera	ORF1b:A520V	May	1	16052
Jena	ORF1b:A520V	May	6	16053
Suhl	ORF1b:A520V	May	3	16054
Weimar	ORF1b:A520V	May	49	16055
Eisenach	ORF1b:A520V	May	3	16056
Eichsfeld	ORF1b:A520V	May	3	16061
Nordhausen	ORF1b:A520V	May	5	16062
Wartburgkreis	ORF1b:A520V	May	10	16063
Unstrut-Hainich-Kreis	ORF1b:A520V	May	30	16064
Kyffhaeuserkreis	ORF1b:A520V	May	36	16065
Schmalkalden-Meiningen	ORF1b:A520V	May	1	16066
Gotha	ORF1b:A520V	May	326	16067
Soemmerda	ORF1b:A520V	May	157	16068
Hildburghausen	ORF1b:A520V	May	5	16069
Ilm-Kreis	ORF1b:A520V	May	101	16070
Weimarer Land	ORF1b:A520V	May	9	16071
Sonneberg	ORF1b:A520V	May	1	16072
Saalfeld-Rudolstadt	ORF1b:A520V	May	1	16073
Saale-Holzland-Kreis	ORF1b:A520V	May	8	16074
Saale-Orla-Kreis	ORF1b:A520V	May		16075
Greiz	ORF1b:A520V	May	1	16076
Altenburger Land	ORF1b:A520V	May		16077
Erfurt	ORF1b:A520V	Jun	55	16051
Gera	ORF1b:A520V	Jun	1	16052
Jena	ORF1b:A520V	Jun	6	16053
Suhl	ORF1b:A520V	Jun	3	16054
Weimar	ORF1b:A520V	Jun	49	16055
Eisenach	ORF1b:A520V	Jun	3	16056
Eichsfeld	ORF1b:A520V	Jun	3	16061
Nordhausen	ORF1b:A520V	Jun	5	16062
Wartburgkreis	ORF1b:A520V	Jun	10	16063
Unstrut-Hainich-Kreis	ORF1b:A520V	Jun	30	16064
Kyffhaeuserkreis	ORF1b:A520V	Jun	36	16065
Schmalkalden-Meiningen	ORF1b:A520V	Jun	1	16066
Gotha	ORF1b:A520V	Jun	326	16067
Soemmerda	ORF1b:A520V	Jun	157	16068
Hildburghausen	ORF1b:A520V	Jun	5	16069
Ilm-Kreis	ORF1b:A520V	Jun	101	16070
Weimarer Land	ORF1b:A520V	Jun	9	16071
Sonneberg	ORF1b:A520V	Jun	1	16072
Saalfeld-Rudolstadt	ORF1b:A520V	Jun	1	16073
Saale-Holzland-Kreis	ORF1b:A520V	Jun	8	16074
Saale-Orla-Kreis	ORF1b:A520V	Jun		16075
Greiz	ORF1b:A520V	Jun	1	16076
Altenburger Land	ORF1b:A520V	Jun		16077
Erfurt	S:G496S	Mar		16051
Gera	S:G496S	Mar		16052
Jena	S:G496S	Mar		16053
Suhl	S:G496S	Mar		16054
Weimar	S:G496S	Mar		16055
Eisenach	S:G496S	Mar		16056
Eichsfeld	S:G496S	Mar		16061
Nordhausen	S:G496S	Mar	1	16062
Wartburgkreis	S:G496S	Mar		16063
Unstrut-Hainich-Kreis	S:G496S	Mar		16064
Kyffhaeuserkreis	S:G496S	Mar		16065
Schmalkalden-Meiningen	S:G496S	Mar		16066
Gotha	S:G496S	Mar		16067
Soemmerda	S:G496S	Mar		16068
Hildburghausen	S:G496S	Mar		16069
Ilm-Kreis	S:G496S	Mar		16070
Weimarer Land	S:G496S	Mar		16071
Sonneberg	S:G496S	Mar		16072
Saalfeld-Rudolstadt	S:G496S	Mar		16073
Saale-Holzland-Kreis	S:G496S	Mar		16074
Saale-Orla-Kreis	S:G496S	Mar		16075
Greiz	S:G496S	Mar		16076
Altenburger Land	S:G496S	Mar		16077
Erfurt	S:G496S	Apr		16051
Gera	S:G496S	Apr	1	16052
Jena	S:G496S	Apr		16053
Suhl	S:G496S	Apr		16054
Weimar	S:G496S	Apr		16055
Eisenach	S:G496S	Apr		16056
Eichsfeld	S:G496S	Apr	2	16061
Nordhausen	S:G496S	Apr	1	16062
Wartburgkreis	S:G496S	Apr		16063
Unstrut-Hainich-Kreis	S:G496S	Apr		16064
Kyffhaeuserkreis	S:G496S	Apr		16065
Schmalkalden-Meiningen	S:G496S	Apr		16066
Gotha	S:G496S	Apr		16067
Soemmerda	S:G496S	Apr		16068
Hildburghausen	S:G496S	Apr		16069
Ilm-Kreis	S:G496S	Apr		16070
Weimarer Land	S:G496S	Apr		16071
Sonneberg	S:G496S	Apr		16072
Saalfeld-Rudolstadt	S:G496S	Apr		16073
Saale-Holzland-Kreis	S:G496S	Apr		16074
Saale-Orla-Kreis	S:G496S	Apr		16075
Greiz	S:G496S	Apr	3	16076
Altenburger Land	S:G496S	Apr		16077
Erfurt	S:G496S	May		16051
Gera	S:G496S	May	1	16052
Jena	S:G496S	May		16053
Suhl	S:G496S	May		16054
Weimar	S:G496S	May		16055
Eisenach	S:G496S	May		16056
Eichsfeld	S:G496S	May	2	16061
Nordhausen	S:G496S	May	1	16062
Wartburgkreis	S:G496S	May		16063
Unstrut-Hainich-Kreis	S:G496S	May		16064
Kyffhaeuserkreis	S:G496S	May		16065
Schmalkalden-Meiningen	S:G496S	May		16066
Gotha	S:G496S	May		16067
Soemmerda	S:G496S	May		16068
Hildburghausen	S:G496S	May		16069
Ilm-Kreis	S:G496S	May		16070
Weimarer Land	S:G496S	May		16071
Sonneberg	S:G496S	May		16072
Saalfeld-Rudolstadt	S:G496S	May		16073
Saale-Holzland-Kreis	S:G496S	May		16074
Saale-Orla-Kreis	S:G496S	May	1	16075
Greiz	S:G496S	May	7	16076
Altenburger Land	S:G496S	May		16077
Erfurt	S:H49Y	Feb		16051
Gera	S:H49Y	Feb		16052
Jena	S:H49Y	Feb	2	16053
Suhl	S:H49Y	Feb		16054
Weimar	S:H49Y	Feb		16055
Eisenach	S:H49Y	Feb		16056
Eichsfeld	S:H49Y	Feb		16061
Nordhausen	S:H49Y	Feb		16062
Wartburgkreis	S:H49Y	Feb		16063
Unstrut-Hainich-Kreis	S:H49Y	Feb		16064
Kyffhaeuserkreis	S:H49Y	Feb		16065
Schmalkalden-Meiningen	S:H49Y	Feb		16066
Gotha	S:H49Y	Feb		16067
Soemmerda	S:H49Y	Feb		16068
Hildburghausen	S:H49Y	Feb		16069
Ilm-Kreis	S:H49Y	Feb		16070
Weimarer Land	S:H49Y	Feb		16071
Sonneberg	S:H49Y	Feb		16072
Saalfeld-Rudolstadt	S:H49Y	Feb		16073
Saale-Holzland-Kreis	S:H49Y	Feb	1	16074
Saale-Orla-Kreis	S:H49Y	Feb		16075
Greiz	S:H49Y	Feb		16076
Altenburger Land	S:H49Y	Feb		16077
Erfurt	S:H49Y	Mar		16051
Gera	S:H49Y	Mar	1	16052
Jena	S:H49Y	Mar	2	16053
Suhl	S:H49Y	Mar		16054
Weimar	S:H49Y	Mar		16055
Eisenach	S:H49Y	Mar		16056
Eichsfeld	S:H49Y	Mar	1	16061
Nordhausen	S:H49Y	Mar		16062
Wartburgkreis	S:H49Y	Mar		16063
Unstrut-Hainich-Kreis	S:H49Y	Mar	1	16064
Kyffhaeuserkreis	S:H49Y	Mar		16065
Schmalkalden-Meiningen	S:H49Y	Mar		16066
Gotha	S:H49Y	Mar		16067
Soemmerda	S:H49Y	Mar	1	16068
Hildburghausen	S:H49Y	Mar		16069
Ilm-Kreis	S:H49Y	Mar		16070
Weimarer Land	S:H49Y	Mar		16071
Sonneberg	S:H49Y	Mar		16072
Saalfeld-Rudolstadt	S:H49Y	Mar		16073
Saale-Holzland-Kreis	S:H49Y	Mar	1	16074
Saale-Orla-Kreis	S:H49Y	Mar		16075
Greiz	S:H49Y	Mar	1	16076
Altenburger Land	S:H49Y	Mar		16077
Erfurt	S:H49Y	Apr	2	16051
Gera	S:H49Y	Apr	9	16052
Jena	S:H49Y	Apr	2	16053
Suhl	S:H49Y	Apr		16054
Weimar	S:H49Y	Apr	3	16055
Eisenach	S:H49Y	Apr		16056
Eichsfeld	S:H49Y	Apr	3	16061
Nordhausen	S:H49Y	Apr		16062
Wartburgkreis	S:H49Y	Apr		16063
Unstrut-Hainich-Kreis	S:H49Y	Apr	6	16064
Kyffhaeuserkreis	S:H49Y	Apr		16065
Schmalkalden-Meiningen	S:H49Y	Apr		16066
Gotha	S:H49Y	Apr	2	16067
Soemmerda	S:H49Y	Apr	5	16068
Hildburghausen	S:H49Y	Apr		16069
Ilm-Kreis	S:H49Y	Apr		16070
Weimarer Land	S:H49Y	Apr	2	16071
Sonneberg	S:H49Y	Apr		16072
Saalfeld-Rudolstadt	S:H49Y	Apr		16073
Saale-Holzland-Kreis	S:H49Y	Apr	1	16074
Saale-Orla-Kreis	S:H49Y	Apr		16075
Greiz	S:H49Y	Apr	4	16076
Altenburger Land	S:H49Y	Apr	1	16077
Erfurt	S:H49Y	May	3	16051
Gera	S:H49Y	May	9	16052
Jena	S:H49Y	May	2	16053
Suhl	S:H49Y	May		16054
Weimar	S:H49Y	May	4	16055
Eisenach	S:H49Y	May		16056
Eichsfeld	S:H49Y	May	3	16061
Nordhausen	S:H49Y	May		16062
Wartburgkreis	S:H49Y	May		16063
Unstrut-Hainich-Kreis	S:H49Y	May	6	16064
Kyffhaeuserkreis	S:H49Y	May		16065
Schmalkalden-Meiningen	S:H49Y	May		16066
Gotha	S:H49Y	May	3	16067
Soemmerda	S:H49Y	May	5	16068
Hildburghausen	S:H49Y	May		16069
Ilm-Kreis	S:H49Y	May		16070
Weimarer Land	S:H49Y	May	2	16071
Sonneberg	S:H49Y	May		16072
Saalfeld-Rudolstadt	S:H49Y	May		16073
Saale-Holzland-Kreis	S:H49Y	May	2	16074
Saale-Orla-Kreis	S:H49Y	May		16075
Greiz	S:H49Y	May	4	16076
Altenburger Land	S:H49Y	May	1	16077
Erfurt	S:N185D	Feb		16051
Gera	S:N185D	Feb		16052
Jena	S:N185D	Feb		16053
Suhl	S:N185D	Feb		16054
Weimar	S:N185D	Feb		16055
Eisenach	S:N185D	Feb	1	16056
Eichsfeld	S:N185D	Feb		16061
Nordhausen	S:N185D	Feb		16062
Wartburgkreis	S:N185D	Feb	1	16063
Unstrut-Hainich-Kreis	S:N185D	Feb		16064
Kyffhaeuserkreis	S:N185D	Feb		16065
Schmalkalden-Meiningen	S:N185D	Feb		16066
Gotha	S:N185D	Feb	1	16067
Soemmerda	S:N185D	Feb		16068
Hildburghausen	S:N185D	Feb		16069
Ilm-Kreis	S:N185D	Feb		16070
Weimarer Land	S:N185D	Feb		16071
Sonneberg	S:N185D	Feb		16072
Saalfeld-Rudolstadt	S:N185D	Feb		16073
Saale-Holzland-Kreis	S:N185D	Feb		16074
Saale-Orla-Kreis	S:N185D	Feb		16075
Greiz	S:N185D	Feb		16076
Altenburger Land	S:N185D	Feb		16077
Erfurt	S:N185D	Mar		16051
Gera	S:N185D	Mar		16052
Jena	S:N185D	Mar		16053
Suhl	S:N185D	Mar		16054
Weimar	S:N185D	Mar		16055
Eisenach	S:N185D	Mar	2	16056
Eichsfeld	S:N185D	Mar		16061
Nordhausen	S:N185D	Mar		16062
Wartburgkreis	S:N185D	Mar	3	16063
Unstrut-Hainich-Kreis	S:N185D	Mar		16064
Kyffhaeuserkreis	S:N185D	Mar		16065
Schmalkalden-Meiningen	S:N185D	Mar		16066
Gotha	S:N185D	Mar	10	16067
Soemmerda	S:N185D	Mar		16068
Hildburghausen	S:N185D	Mar		16069
Ilm-Kreis	S:N185D	Mar		16070
Weimarer Land	S:N185D	Mar		16071
Sonneberg	S:N185D	Mar		16072
Saalfeld-Rudolstadt	S:N185D	Mar		16073
Saale-Holzland-Kreis	S:N185D	Mar		16074
Saale-Orla-Kreis	S:N185D	Mar		16075
Greiz	S:N185D	Mar		16076
Altenburger Land	S:N185D	Mar		16077
Erfurt	S:N185D	Apr		16051
Gera	S:N185D	Apr		16052
Jena	S:N185D	Apr	1	16053
Suhl	S:N185D	Apr		16054
Weimar	S:N185D	Apr	3	16055
Eisenach	S:N185D	Apr	2	16056
Eichsfeld	S:N185D	Apr		16061
Nordhausen	S:N185D	Apr		16062
Wartburgkreis	S:N185D	Apr	5	16063
Unstrut-Hainich-Kreis	S:N185D	Apr	1	16064
Kyffhaeuserkreis	S:N185D	Apr		16065
Schmalkalden-Meiningen	S:N185D	Apr		16066
Gotha	S:N185D	Apr	26	16067
Soemmerda	S:N185D	Apr		16068
Hildburghausen	S:N185D	Apr	1	16069
Ilm-Kreis	S:N185D	Apr		16070
Weimarer Land	S:N185D	Apr		16071
Sonneberg	S:N185D	Apr		16072
Saalfeld-Rudolstadt	S:N185D	Apr		16073
Saale-Holzland-Kreis	S:N185D	Apr		16074
Saale-Orla-Kreis	S:N185D	Apr		16075
Greiz	S:N185D	Apr		16076
Altenburger Land	S:N185D	Apr		16077
Erfurt	S:N185D	May		16051
Gera	S:N185D	May		16052
Jena	S:N185D	May	1	16053
Suhl	S:N185D	May		16054
Weimar	S:N185D	May	3	16055
Eisenach	S:N185D	May	2	16056
Eichsfeld	S:N185D	May		16061
Nordhausen	S:N185D	May		16062
Wartburgkreis	S:N185D	May	5	16063
Unstrut-Hainich-Kreis	S:N185D	May	1	16064
Kyffhaeuserkreis	S:N185D	May		16065
Schmalkalden-Meiningen	S:N185D	May		16066
Gotha	S:N185D	May	27	16067
Soemmerda	S:N185D	May		16068
Hildburghausen	S:N185D	May	1	16069
Ilm-Kreis	S:N185D	May		16070
Weimarer Land	S:N185D	May		16071
Sonneberg	S:N185D	May		16072
Saalfeld-Rudolstadt	S:N185D	May		16073
Saale-Holzland-Kreis	S:N185D	May		16074
Saale-Orla-Kreis	S:N185D	May		16075
Greiz	S:N185D	May		16076
Altenburger Land	S:N185D	May		16077
Erfurt	S:N354K	Feb		16051
Gera	S:N354K	Feb		16052
Jena	S:N354K	Feb		16053
Suhl	S:N354K	Feb		16054
Weimar	S:N354K	Feb		16055
Eisenach	S:N354K	Feb		16056
Eichsfeld	S:N354K	Feb		16061
Nordhausen	S:N354K	Feb		16062
Wartburgkreis	S:N354K	Feb	1	16063
Unstrut-Hainich-Kreis	S:N354K	Feb		16064
Kyffhaeuserkreis	S:N354K	Feb		16065
Schmalkalden-Meiningen	S:N354K	Feb	5	16066
Gotha	S:N354K	Feb		16067
Soemmerda	S:N354K	Feb		16068
Hildburghausen	S:N354K	Feb		16069
Ilm-Kreis	S:N354K	Feb		16070
Weimarer Land	S:N354K	Feb		16071
Sonneberg	S:N354K	Feb		16072
Saalfeld-Rudolstadt	S:N354K	Feb		16073
Saale-Holzland-Kreis	S:N354K	Feb		16074
Saale-Orla-Kreis	S:N354K	Feb		16075
Greiz	S:N354K	Feb		16076
Altenburger Land	S:N354K	Feb		16077
Erfurt	S:N354K	Mar		16051
Gera	S:N354K	Mar		16052
Jena	S:N354K	Mar		16053
Suhl	S:N354K	Mar		16054
Weimar	S:N354K	Mar	1	16055
Eisenach	S:N354K	Mar		16056
Eichsfeld	S:N354K	Mar		16061
Nordhausen	S:N354K	Mar		16062
Wartburgkreis	S:N354K	Mar	5	16063
Unstrut-Hainich-Kreis	S:N354K	Mar		16064
Kyffhaeuserkreis	S:N354K	Mar		16065
Schmalkalden-Meiningen	S:N354K	Mar	10	16066
Gotha	S:N354K	Mar	2	16067
Soemmerda	S:N354K	Mar		16068
Hildburghausen	S:N354K	Mar		16069
Ilm-Kreis	S:N354K	Mar	3	16070
Weimarer Land	S:N354K	Mar		16071
Sonneberg	S:N354K	Mar		16072
Saalfeld-Rudolstadt	S:N354K	Mar		16073
Saale-Holzland-Kreis	S:N354K	Mar		16074
Saale-Orla-Kreis	S:N354K	Mar		16075
Greiz	S:N354K	Mar		16076
Altenburger Land	S:N354K	Mar		16077
Erfurt	S:N354K	Apr	4	16051
Gera	S:N354K	Apr		16052
Jena	S:N354K	Apr	1	16053
Suhl	S:N354K	Apr		16054
Weimar	S:N354K	Apr	1	16055
Eisenach	S:N354K	Apr		16056
Eichsfeld	S:N354K	Apr	2	16061
Nordhausen	S:N354K	Apr		16062
Wartburgkreis	S:N354K	Apr	5	16063
Unstrut-Hainich-Kreis	S:N354K	Apr	1	16064
Kyffhaeuserkreis	S:N354K	Apr		16065
Schmalkalden-Meiningen	S:N354K	Apr	11	16066
Gotha	S:N354K	Apr	12	16067
Soemmerda	S:N354K	Apr	4	16068
Hildburghausen	S:N354K	Apr	3	16069
Ilm-Kreis	S:N354K	Apr	10	16070
Weimarer Land	S:N354K	Apr		16071
Sonneberg	S:N354K	Apr		16072
Saalfeld-Rudolstadt	S:N354K	Apr		16073
Saale-Holzland-Kreis	S:N354K	Apr		16074
Saale-Orla-Kreis	S:N354K	Apr		16075
Greiz	S:N354K	Apr		16076
Altenburger Land	S:N354K	Apr		16077
Erfurt	S:N354K	May	4	16051
Gera	S:N354K	May		16052
Jena	S:N354K	May	1	16053
Suhl	S:N354K	May		16054
Weimar	S:N354K	May	1	16055
Eisenach	S:N354K	May		16056
Eichsfeld	S:N354K	May	2	16061
Nordhausen	S:N354K	May	1	16062
Wartburgkreis	S:N354K	May	5	16063
Unstrut-Hainich-Kreis	S:N354K	May	1	16064
Kyffhaeuserkreis	S:N354K	May		16065
Schmalkalden-Meiningen	S:N354K	May	11	16066
Gotha	S:N354K	May	16	16067
Soemmerda	S:N354K	May	4	16068
Hildburghausen	S:N354K	May	6	16069
Ilm-Kreis	S:N354K	May	11	16070
Weimarer Land	S:N354K	May		16071
Sonneberg	S:N354K	May		16072
Saalfeld-Rudolstadt	S:N354K	May		16073
Saale-Holzland-Kreis	S:N354K	May		16074
Saale-Orla-Kreis	S:N354K	May		16075
Greiz	S:N354K	May		16076
Altenburger Land	S:N354K	May		16077
Erfurt	S:N703D	Mar	1	16051
Gera	S:N703D	Mar		16052
Jena	S:N703D	Mar		16053
Suhl	S:N703D	Mar		16054
Weimar	S:N703D	Mar		16055
Eisenach	S:N703D	Mar		16056
Eichsfeld	S:N703D	Mar	1	16061
Nordhausen	S:N703D	Mar		16062
Wartburgkreis	S:N703D	Mar		16063
Unstrut-Hainich-Kreis	S:N703D	Mar		16064
Kyffhaeuserkreis	S:N703D	Mar		16065
Schmalkalden-Meiningen	S:N703D	Mar		16066
Gotha	S:N703D	Mar	7	16067
Soemmerda	S:N703D	Mar	2	16068
Hildburghausen	S:N703D	Mar		16069
Ilm-Kreis	S:N703D	Mar	1	16070
Weimarer Land	S:N703D	Mar		16071
Sonneberg	S:N703D	Mar		16072
Saalfeld-Rudolstadt	S:N703D	Mar		16073
Saale-Holzland-Kreis	S:N703D	Mar		16074
Saale-Orla-Kreis	S:N703D	Mar		16075
Greiz	S:N703D	Mar		16076
Altenburger Land	S:N703D	Mar		16077
Erfurt	S:N703D	Apr	2	16051
Gera	S:N703D	Apr		16052
Jena	S:N703D	Apr		16053
Suhl	S:N703D	Apr		16054
Weimar	S:N703D	Apr	2	16055
Eisenach	S:N703D	Apr		16056
Eichsfeld	S:N703D	Apr	3	16061
Nordhausen	S:N703D	Apr		16062
Wartburgkreis	S:N703D	Apr		16063
Unstrut-Hainich-Kreis	S:N703D	Apr	7	16064
Kyffhaeuserkreis	S:N703D	Apr	6	16065
Schmalkalden-Meiningen	S:N703D	Apr		16066
Gotha	S:N703D	Apr	10	16067
Soemmerda	S:N703D	Apr	12	16068
Hildburghausen	S:N703D	Apr		16069
Ilm-Kreis	S:N703D	Apr	3	16070
Weimarer Land	S:N703D	Apr		16071
Sonneberg	S:N703D	Apr		16072
Saalfeld-Rudolstadt	S:N703D	Apr		16073
Saale-Holzland-Kreis	S:N703D	Apr		16074
Saale-Orla-Kreis	S:N703D	Apr		16075
Greiz	S:N703D	Apr		16076
Altenburger Land	S:N703D	Apr		16077
Erfurt	S:N703D	May	2	16051
Gera	S:N703D	May		16052
Jena	S:N703D	May		16053
Suhl	S:N703D	May		16054
Weimar	S:N703D	May	2	16055
Eisenach	S:N703D	May		16056
Eichsfeld	S:N703D	May	3	16061
Nordhausen	S:N703D	May		16062
Wartburgkreis	S:N703D	May		16063
Unstrut-Hainich-Kreis	S:N703D	May	8	16064
Kyffhaeuserkreis	S:N703D	May	6	16065
Schmalkalden-Meiningen	S:N703D	May		16066
Gotha	S:N703D	May	10	16067
Soemmerda	S:N703D	May	16	16068
Hildburghausen	S:N703D	May		16069
Ilm-Kreis	S:N703D	May	4	16070
Weimarer Land	S:N703D	May		16071
Sonneberg	S:N703D	May		16072
Saalfeld-Rudolstadt	S:N703D	May		16073
Saale-Holzland-Kreis	S:N703D	May		16074
Saale-Orla-Kreis	S:N703D	May		16075
Greiz	S:N703D	May		16076
Altenburger Land	S:N703D	May		16077
Erfurt	S:S939F	Feb		16051
Gera	S:S939F	Feb		16052
Jena	S:S939F	Feb		16053
Suhl	S:S939F	Feb		16054
Weimar	S:S939F	Feb		16055
Eisenach	S:S939F	Feb		16056
Eichsfeld	S:S939F	Feb		16061
Nordhausen	S:S939F	Feb		16062
Wartburgkreis	S:S939F	Feb		16063
Unstrut-Hainich-Kreis	S:S939F	Feb		16064
Kyffhaeuserkreis	S:S939F	Feb		16065
Schmalkalden-Meiningen	S:S939F	Feb		16066
Gotha	S:S939F	Feb		16067
Soemmerda	S:S939F	Feb		16068
Hildburghausen	S:S939F	Feb		16069
Ilm-Kreis	S:S939F	Feb		16070
Weimarer Land	S:S939F	Feb		16071
Sonneberg	S:S939F	Feb		16072
Saalfeld-Rudolstadt	S:S939F	Feb		16073
Saale-Holzland-Kreis	S:S939F	Feb		16074
Saale-Orla-Kreis	S:S939F	Feb	6	16075
Greiz	S:S939F	Feb	12	16076
Altenburger Land	S:S939F	Feb		16077
Erfurt	S:S939F	Mar		16051
Gera	S:S939F	Mar	24	16052
Jena	S:S939F	Mar	3	16053
Suhl	S:S939F	Mar		16054
Weimar	S:S939F	Mar	1	16055
Eisenach	S:S939F	Mar		16056
Eichsfeld	S:S939F	Mar		16061
Nordhausen	S:S939F	Mar		16062
Wartburgkreis	S:S939F	Mar		16063
Unstrut-Hainich-Kreis	S:S939F	Mar		16064
Kyffhaeuserkreis	S:S939F	Mar		16065
Schmalkalden-Meiningen	S:S939F	Mar		16066
Gotha	S:S939F	Mar		16067
Soemmerda	S:S939F	Mar	1	16068
Hildburghausen	S:S939F	Mar		16069
Ilm-Kreis	S:S939F	Mar		16070
Weimarer Land	S:S939F	Mar		16071
Sonneberg	S:S939F	Mar		16072
Saalfeld-Rudolstadt	S:S939F	Mar		16073
Saale-Holzland-Kreis	S:S939F	Mar	11	16074
Saale-Orla-Kreis	S:S939F	Mar	14	16075
Greiz	S:S939F	Mar	84	16076
Altenburger Land	S:S939F	Mar		16077
Erfurt	S:S939F	Apr	1	16051
Gera	S:S939F	Apr	36	16052
Jena	S:S939F	Apr	11	16053
Suhl	S:S939F	Apr		16054
Weimar	S:S939F	Apr	1	16055
Eisenach	S:S939F	Apr		16056
Eichsfeld	S:S939F	Apr	1	16061
Nordhausen	S:S939F	Apr		16062
Wartburgkreis	S:S939F	Apr		16063
Unstrut-Hainich-Kreis	S:S939F	Apr		16064
Kyffhaeuserkreis	S:S939F	Apr		16065
Schmalkalden-Meiningen	S:S939F	Apr		16066
Gotha	S:S939F	Apr		16067
Soemmerda	S:S939F	Apr	1	16068
Hildburghausen	S:S939F	Apr		16069
Ilm-Kreis	S:S939F	Apr	2	16070
Weimarer Land	S:S939F	Apr		16071
Sonneberg	S:S939F	Apr		16072
Saalfeld-Rudolstadt	S:S939F	Apr		16073
Saale-Holzland-Kreis	S:S939F	Apr	18	16074
Saale-Orla-Kreis	S:S939F	Apr	17	16075
Greiz	S:S939F	Apr	102	16076
Altenburger Land	S:S939F	Apr	1	16077
Erfurt	S:S939F	May	1	16051
Gera	S:S939F	May	40	16052
Jena	S:S939F	May	12	16053
Suhl	S:S939F	May		16054
Weimar	S:S939F	May	3	16055
Eisenach	S:S939F	May		16056
Eichsfeld	S:S939F	May	1	16061
Nordhausen	S:S939F	May		16062
Wartburgkreis	S:S939F	May		16063
Unstrut-Hainich-Kreis	S:S939F	May		16064
Kyffhaeuserkreis	S:S939F	May		16065
Schmalkalden-Meiningen	S:S939F	May		16066
Gotha	S:S939F	May		16067
Soemmerda	S:S939F	May	1	16068
Hildburghausen	S:S939F	May		16069
Ilm-Kreis	S:S939F	May	5	16070
Weimarer Land	S:S939F	May		16071
Sonneberg	S:S939F	May		16072
Saalfeld-Rudolstadt	S:S939F	May		16073
Saale-Holzland-Kreis	S:S939F	May	19	16074
Saale-Orla-Kreis	S:S939F	May	18	16075
Greiz	S:S939F	May	105	16076
Altenburger Land	S:S939F	May	1	16077
Erfurt	S:T716V	Apr		16051
Gera	S:T716V	Apr		16052
Jena	S:T716V	Apr	1	16053
Suhl	S:T716V	Apr		16054
Weimar	S:T716V	Apr	9	16055
Eisenach	S:T716V	Apr		16056
Eichsfeld	S:T716V	Apr		16061
Nordhausen	S:T716V	Apr		16062
Wartburgkreis	S:T716V	Apr		16063
Unstrut-Hainich-Kreis	S:T716V	Apr		16064
Kyffhaeuserkreis	S:T716V	Apr		16065
Schmalkalden-Meiningen	S:T716V	Apr		16066
Gotha	S:T716V	Apr		16067
Soemmerda	S:T716V	Apr		16068
Hildburghausen	S:T716V	Apr		16069
Ilm-Kreis	S:T716V	Apr		16070
Weimarer Land	S:T716V	Apr	2	16071
Sonneberg	S:T716V	Apr		16072
Saalfeld-Rudolstadt	S:T716V	Apr		16073
Saale-Holzland-Kreis	S:T716V	Apr		16074
Saale-Orla-Kreis	S:T716V	Apr		16075
Greiz	S:T716V	Apr		16076
Altenburger Land	S:T716V	Apr		16077
Erfurt	S:T716V	May		16051
Gera	S:T716V	May		16052
Jena	S:T716V	May	2	16053
Suhl	S:T716V	May		16054
Weimar	S:T716V	May	13	16055
Eisenach	S:T716V	May		16056
Eichsfeld	S:T716V	May		16061
Nordhausen	S:T716V	May		16062
Wartburgkreis	S:T716V	May		16063
Unstrut-Hainich-Kreis	S:T716V	May		16064
Kyffhaeuserkreis	S:T716V	May		16065
Schmalkalden-Meiningen	S:T716V	May		16066
Gotha	S:T716V	May		16067
Soemmerda	S:T716V	May	2	16068
Hildburghausen	S:T716V	May		16069
Ilm-Kreis	S:T716V	May		16070
Weimarer Land	S:T716V	May	5	16071
Sonneberg	S:T716V	May		16072
Saalfeld-Rudolstadt	S:T716V	May		16073
Saale-Holzland-Kreis	S:T716V	May		16074
Saale-Orla-Kreis	S:T716V	May		16075
Greiz	S:T716V	May		16076
Altenburger Land	S:T716V	May		16077
Erfurt	S:V90F	Feb		16051
Gera	S:V90F	Feb		16052
Jena	S:V90F	Feb		16053
Suhl	S:V90F	Feb		16054
Weimar	S:V90F	Feb		16055
Eisenach	S:V90F	Feb		16056
Eichsfeld	S:V90F	Feb		16061
Nordhausen	S:V90F	Feb		16062
Wartburgkreis	S:V90F	Feb		16063
Unstrut-Hainich-Kreis	S:V90F	Feb		16064
Kyffhaeuserkreis	S:V90F	Feb		16065
Schmalkalden-Meiningen	S:V90F	Feb		16066
Gotha	S:V90F	Feb		16067
Soemmerda	S:V90F	Feb		16068
Hildburghausen	S:V90F	Feb		16069
Ilm-Kreis	S:V90F	Feb		16070
Weimarer Land	S:V90F	Feb		16071
Sonneberg	S:V90F	Feb		16072
Saalfeld-Rudolstadt	S:V90F	Feb		16073
Saale-Holzland-Kreis	S:V90F	Feb		16074
Saale-Orla-Kreis	S:V90F	Feb		16075
Greiz	S:V90F	Feb	1	16076
Altenburger Land	S:V90F	Feb		16077
Erfurt	S:V90F	Mar		16051
Gera	S:V90F	Mar	7	16052
Jena	S:V90F	Mar	2	16053
Suhl	S:V90F	Mar		16054
Weimar	S:V90F	Mar		16055
Eisenach	S:V90F	Mar		16056
Eichsfeld	S:V90F	Mar		16061
Nordhausen	S:V90F	Mar		16062
Wartburgkreis	S:V90F	Mar		16063
Unstrut-Hainich-Kreis	S:V90F	Mar		16064
Kyffhaeuserkreis	S:V90F	Mar		16065
Schmalkalden-Meiningen	S:V90F	Mar		16066
Gotha	S:V90F	Mar		16067
Soemmerda	S:V90F	Mar		16068
Hildburghausen	S:V90F	Mar		16069
Ilm-Kreis	S:V90F	Mar		16070
Weimarer Land	S:V90F	Mar		16071
Sonneberg	S:V90F	Mar		16072
Saalfeld-Rudolstadt	S:V90F	Mar		16073
Saale-Holzland-Kreis	S:V90F	Mar	2	16074
Saale-Orla-Kreis	S:V90F	Mar		16075
Greiz	S:V90F	Mar	18	16076
Altenburger Land	S:V90F	Mar		16077
Erfurt	S:V90F	Apr		16051
Gera	S:V90F	Apr	13	16052
Jena	S:V90F	Apr	8	16053
Suhl	S:V90F	Apr		16054
Weimar	S:V90F	Apr		16055
Eisenach	S:V90F	Apr		16056
Eichsfeld	S:V90F	Apr		16061
Nordhausen	S:V90F	Apr		16062
Wartburgkreis	S:V90F	Apr		16063
Unstrut-Hainich-Kreis	S:V90F	Apr		16064
Kyffhaeuserkreis	S:V90F	Apr		16065
Schmalkalden-Meiningen	S:V90F	Apr		16066
Gotha	S:V90F	Apr		16067
Soemmerda	S:V90F	Apr		16068
Hildburghausen	S:V90F	Apr		16069
Ilm-Kreis	S:V90F	Apr		16070
Weimarer Land	S:V90F	Apr		16071
Sonneberg	S:V90F	Apr		16072
Saalfeld-Rudolstadt	S:V90F	Apr		16073
Saale-Holzland-Kreis	S:V90F	Apr	4	16074
Saale-Orla-Kreis	S:V90F	Apr	2	16075
Greiz	S:V90F	Apr	23	16076
Altenburger Land	S:V90F	Apr		16077
Erfurt	S:V90F	May		16051
Gera	S:V90F	May	13	16052
Jena	S:V90F	May	8	16053
Suhl	S:V90F	May		16054
Weimar	S:V90F	May	2	16055
Eisenach	S:V90F	May		16056
Eichsfeld	S:V90F	May		16061
Nordhausen	S:V90F	May		16062
Wartburgkreis	S:V90F	May		16063
Unstrut-Hainich-Kreis	S:V90F	May		16064
Kyffhaeuserkreis	S:V90F	May		16065
Schmalkalden-Meiningen	S:V90F	May		16066
Gotha	S:V90F	May		16067
Soemmerda	S:V90F	May		16068
Hildburghausen	S:V90F	May		16069
Ilm-Kreis	S:V90F	May		16070
Weimarer Land	S:V90F	May		16071
Sonneberg	S:V90F	May		16072
Saalfeld-Rudolstadt	S:V90F	May		16073
Saale-Holzland-Kreis	S:V90F	May	4	16074
Saale-Orla-Kreis	S:V90F	May	3	16075
Greiz	S:V90F	May	25	16076
Altenburger Land	S:V90F	May		16077
