# Supplementary material for: Leveraging mobility data to analyze persistent SARS-CoV-2 mutations and inform targeted genomic surveillance
Source: eLife. 2025 Jan 15;13:RP94045. doi: 10.7554/eLife.94045 (PMC11735024; doi:10.7554/eLife.94045)
Supplement: Figure 2—source data 2. — The proportion of trips from cluster-affiliated districts among the total incoming trips is calculated. [file elife-94045-fig2-data2.xlsx]

## Sheet: Figure 2-source data 2
Kreis	cluster	month	infected	id	total_monthly_infected_mobility	total_monthly_mobility	infected_mobility_percentage
Erfurt	ORF1b:A520V	Feb	1	16051	1316495	2133317	61.71
Gera	ORF1b:A520V	Feb	0	16052	20775	790701	2.63
Jena	ORF1b:A520V	Feb	0	16053	48486	903232	5.37
Suhl	ORF1b:A520V	Feb	0	16054	62325	331549	18.8
Weimar	ORF1b:A520V	Feb	0	16055	127451	686813	18.56
Eisenach	ORF1b:A520V	Feb	1	16056	119747	419041	28.58
Eichsfeld	ORF1b:A520V	Feb	0	16061	31074	302068	10.29
Nordhausen	ORF1b:A520V	Feb	0	16062	32986	261794	12.6
Wartburgkreis	ORF1b:A520V	Feb	1	16063	386848	749641	51.6
Unstrut-Hainich-Kreis	ORF1b:A520V	Feb	0	16064	350970	684160	51.3
Kyffhaeuserkreis	ORF1b:A520V	Feb	0	16065	210568	440194	47.84
Schmalkalden-Meiningen	ORF1b:A520V	Feb	0	16066	269750	720844	37.42
Gotha	ORF1b:A520V	Feb	1	16067	232650	771444	30.16
Soemmerda	ORF1b:A520V	Feb	1	16068	365050	802337	45.5
Hildburghausen	ORF1b:A520V	Feb	1	16069	37596	351984	10.68
Ilm-Kreis	ORF1b:A520V	Feb	1	16070	644851	1107249	58.24
Weimarer Land	ORF1b:A520V	Feb	0	16071	318182	1203153	26.45
Sonneberg	ORF1b:A520V	Feb	0	16072	22755	196243	11.6
Saalfeld-Rudolstadt	ORF1b:A520V	Feb	0	16073	83013	630433	13.17
Saale-Holzland-Kreis	ORF1b:A520V	Feb	0	16074	46096	1138203	4.05
Saale-Orla-Kreis	ORF1b:A520V	Feb	0	16075	15653	540692	2.89
Greiz	ORF1b:A520V	Feb	0	16076	18881	1032857	1.83
Altenburger Land	ORF1b:A520V	Feb	0	16077	8938	163612	5.46
Erfurt	ORF1b:A520V	Mar	1	16051	4620224	5056139	91.38
Gera	ORF1b:A520V	Mar	0	16052	75413	1200292	6.28
Jena	ORF1b:A520V	Mar	0	16053	225041	1325593	16.98
Suhl	ORF1b:A520V	Mar	1	16054	212181	511647	41.47
Weimar	ORF1b:A520V	Mar	1	16055	508656	932665	54.54
Eisenach	ORF1b:A520V	Mar	1	16056	481732	523798	91.97
Eichsfeld	ORF1b:A520V	Mar	1	16061	143801	264272	54.41
Nordhausen	ORF1b:A520V	Mar	1	16062	147223	307634	47.86
Wartburgkreis	ORF1b:A520V	Mar	1	16063	1149035	1554622	73.91
Unstrut-Hainich-Kreis	ORF1b:A520V	Mar	1	16064	1172294	1422987	82.38
Kyffhaeuserkreis	ORF1b:A520V	Mar	1	16065	807940	909627	88.82
Schmalkalden-Meiningen	ORF1b:A520V	Mar	0	16066	873703	965035	90.54
Gotha	ORF1b:A520V	Mar	1	16067	1129237	1397014	80.83
Soemmerda	ORF1b:A520V	Mar	1	16068	1383921	1568605	88.23
Hildburghausen	ORF1b:A520V	Mar	1	16069	191950	482116	39.81
Ilm-Kreis	ORF1b:A520V	Mar	1	16070	1922455	2337030	82.26
Weimarer Land	ORF1b:A520V	Mar	1	16071	1495164	2068953	72.27
Sonneberg	ORF1b:A520V	Mar	0	16072	84716	285744	29.65
Saalfeld-Rudolstadt	ORF1b:A520V	Mar	0	16073	484474	1089732	44.46
Saale-Holzland-Kreis	ORF1b:A520V	Mar	0	16074	190861	1681313	11.35
Saale-Orla-Kreis	ORF1b:A520V	Mar	0	16075	64694	810093	7.99
Greiz	ORF1b:A520V	Mar	0	16076	67997	1514877	4.49
Altenburger Land	ORF1b:A520V	Mar	0	16077	31710	267589	11.85
Erfurt	ORF1b:A520V	Apr	1	16051	6363634	6455077	98.58
Gera	ORF1b:A520V	Apr	1	16052	128232	758815	16.9
Jena	ORF1b:A520V	Apr	1	16053	360203	542264	66.43
Suhl	ORF1b:A520V	Apr	1	16054	273749	551101	49.67
Weimar	ORF1b:A520V	Apr	1	16055	687196	726979	94.53
Eisenach	ORF1b:A520V	Apr	1	16056	594096	615263	96.56
Eichsfeld	ORF1b:A520V	Apr	1	16061	250174	254015	98.49
Nordhausen	ORF1b:A520V	Apr	1	16062	239042	243056	98.35
Wartburgkreis	ORF1b:A520V	Apr	1	16063	1636493	1972585	82.96
Unstrut-Hainich-Kreis	ORF1b:A520V	Apr	1	16064	1644683	1655570	99.34
Kyffhaeuserkreis	ORF1b:A520V	Apr	1	16065	1061026	1065588	99.57
Schmalkalden-Meiningen	ORF1b:A520V	Apr	0	16066	1180237	1194157	98.83
Gotha	ORF1b:A520V	Apr	1	16067	1346664	1481132	90.92
Soemmerda	ORF1b:A520V	Apr	1	16068	1726846	1744587	98.98
Hildburghausen	ORF1b:A520V	Apr	1	16069	267549	495551	53.99
Ilm-Kreis	ORF1b:A520V	Apr	1	16070	2534987	2689742	94.25
Weimarer Land	ORF1b:A520V	Apr	1	16071	1974734	2096794	94.18
Sonneberg	ORF1b:A520V	Apr	0	16072	116252	163389	71.15
Saalfeld-Rudolstadt	ORF1b:A520V	Apr	1	16073	643852	1073808	59.96
Saale-Holzland-Kreis	ORF1b:A520V	Apr	1	16074	359404	898419	40
Saale-Orla-Kreis	ORF1b:A520V	Apr	0	16075	108362	389695	27.81
Greiz	ORF1b:A520V	Apr	1	16076	122303	810260	15.09
Altenburger Land	ORF1b:A520V	Apr	0	16077	47769	152780	31.27
Erfurt	ORF1b:A520V	May	1	16051	7175584	7237768	99.14
Gera	ORF1b:A520V	May	1	16052	184033	304076	60.52
Jena	ORF1b:A520V	May	1	16053	553815	607288	91.19
Suhl	ORF1b:A520V	May	1	16054	346928	609665	56.9
Weimar	ORF1b:A520V	May	1	16055	796306	810802	98.21
Eisenach	ORF1b:A520V	May	1	16056	652119	672863	96.92
Eichsfeld	ORF1b:A520V	May	1	16061	360946	364248	99.09
Nordhausen	ORF1b:A520V	May	1	16062	321720	324410	99.17
Wartburgkreis	ORF1b:A520V	May	1	16063	1870566	2209144	84.67
Unstrut-Hainich-Kreis	ORF1b:A520V	May	1	16064	1865671	1874222	99.54
Kyffhaeuserkreis	ORF1b:A520V	May	1	16065	1118676	1121715	99.73
Schmalkalden-Meiningen	ORF1b:A520V	May	1	16066	1446040	1451036	99.66
Gotha	ORF1b:A520V	May	1	16067	1641318	1768327	92.82
Soemmerda	ORF1b:A520V	May	1	16068	2075212	2085637	99.5
Hildburghausen	ORF1b:A520V	May	1	16069	344339	520601	66.14
Ilm-Kreis	ORF1b:A520V	May	1	16070	2766989	2857801	96.82
Weimarer Land	ORF1b:A520V	May	1	16071	2410840	2434332	99.03
Sonneberg	ORF1b:A520V	May	1	16072	151665	164148	92.4
Saalfeld-Rudolstadt	ORF1b:A520V	May	1	16073	879964	1163848	75.61
Saale-Holzland-Kreis	ORF1b:A520V	May	1	16074	454371	590413	76.96
Saale-Orla-Kreis	ORF1b:A520V	May	0	16075	155328	164911	94.19
Greiz	ORF1b:A520V	May	1	16076	171103	584904	29.25
Altenburger Land	ORF1b:A520V	May	0	16077	57421	63989	89.74
Erfurt	ORF1b:A520V	Jun	1	16051	2735218	2741105	99.79
Gera	ORF1b:A520V	Jun	1	16052	65469	109542	59.77
Jena	ORF1b:A520V	Jun	1	16053	210527	227629	92.49
Suhl	ORF1b:A520V	Jun	1	16054	136336	136520	99.87
Weimar	ORF1b:A520V	Jun	1	16055	295372	297962	99.13
Eisenach	ORF1b:A520V	Jun	1	16056	257203	257391	99.93
Eichsfeld	ORF1b:A520V	Jun	1	16061	127154	127255	99.92
Nordhausen	ORF1b:A520V	Jun	1	16062	120221	120594	99.69
Wartburgkreis	ORF1b:A520V	Jun	1	16063	658975	660266	99.8
Unstrut-Hainich-Kreis	ORF1b:A520V	Jun	1	16064	728096	728658	99.92
Kyffhaeuserkreis	ORF1b:A520V	Jun	1	16065	402602	402718	99.97
Schmalkalden-Meiningen	ORF1b:A520V	Jun	1	16066	487347	488251	99.81
Gotha	ORF1b:A520V	Jun	1	16067	613351	616414	99.5
Soemmerda	ORF1b:A520V	Jun	1	16068	746715	747999	99.83
Hildburghausen	ORF1b:A520V	Jun	1	16069	121462	122271	99.34
Ilm-Kreis	ORF1b:A520V	Jun	1	16070	1025743	1029467	99.64
Weimarer Land	ORF1b:A520V	Jun	1	16071	856031	861341	99.38
Sonneberg	ORF1b:A520V	Jun	1	16072	54872	56608	96.93
Saalfeld-Rudolstadt	ORF1b:A520V	Jun	1	16073	313808	388822	80.71
Saale-Holzland-Kreis	ORF1b:A520V	Jun	1	16074	164825	208453	79.07
Saale-Orla-Kreis	ORF1b:A520V	Jun	0	16075	57159	59346	96.31
Greiz	ORF1b:A520V	Jun	1	16076	62957	200803	31.35
Altenburger Land	ORF1b:A520V	Jun	0	16077	20186	22073	91.45
Erfurt	S:G496S	Mar	0	16051	2089	189696	1.1
Gera	S:G496S	Mar	0	16052	33	92612	0.04
Jena	S:G496S	Mar	0	16053	147	107137	0.14
Suhl	S:G496S	Mar	0	16054	0	42461	0
Weimar	S:G496S	Mar	0	16055	225	80334	0.28
Eisenach	S:G496S	Mar	0	16056	194	55686	0.35
Eichsfeld	S:G496S	Mar	0	16061	9894	35043	28.23
Nordhausen	S:G496S	Mar	1	16062	0	30503	0
Wartburgkreis	S:G496S	Mar	0	16063	248	61568	0.4
Unstrut-Hainich-Kreis	S:G496S	Mar	0	16064	2169	68136	3.18
Kyffhaeuserkreis	S:G496S	Mar	0	16065	12451	46920	26.54
Schmalkalden-Meiningen	S:G496S	Mar	0	16066	131	81634	0.16
Gotha	S:G496S	Mar	0	16067	457	111144	0.41
Soemmerda	S:G496S	Mar	0	16068	1350	105068	1.28
Hildburghausen	S:G496S	Mar	0	16069	47	40286	0.12
Ilm-Kreis	S:G496S	Mar	0	16070	470	106164	0.44
Weimarer Land	S:G496S	Mar	0	16071	346	140892	0.25
Sonneberg	S:G496S	Mar	0	16072	0	24453	0
Saalfeld-Rudolstadt	S:G496S	Mar	0	16073	98	78694	0.12
Saale-Holzland-Kreis	S:G496S	Mar	0	16074	184	133189	0.14
Saale-Orla-Kreis	S:G496S	Mar	0	16075	47	63434	0.07
Greiz	S:G496S	Mar	0	16076	95	116510	0.08
Altenburger Land	S:G496S	Mar	0	16077	42	21009	0.2
Erfurt	S:G496S	Apr	0	16051	48681	2261216	2.15
Gera	S:G496S	Apr	1	16052	674583	1341480	50.29
Jena	S:G496S	Apr	0	16053	41168	1307079	3.15
Suhl	S:G496S	Apr	0	16054	269	521516	0.05
Weimar	S:G496S	Apr	0	16055	9180	970001	0.95
Eisenach	S:G496S	Apr	0	16056	5960	637183	0.94
Eichsfeld	S:G496S	Apr	1	16061	81102	389335	20.83
Nordhausen	S:G496S	Apr	1	16062	136653	397726	34.36
Wartburgkreis	S:G496S	Apr	0	16063	18137	765051	2.37
Unstrut-Hainich-Kreis	S:G496S	Apr	0	16064	286965	859820	33.38
Kyffhaeuserkreis	S:G496S	Apr	0	16065	125103	521557	23.99
Schmalkalden-Meiningen	S:G496S	Apr	0	16066	5921	1023604	0.58
Gotha	S:G496S	Apr	0	16067	23328	1301292	1.79
Soemmerda	S:G496S	Apr	0	16068	21131	1264785	1.67
Hildburghausen	S:G496S	Apr	0	16069	1477	502327	0.29
Ilm-Kreis	S:G496S	Apr	0	16070	13723	1254768	1.09
Weimarer Land	S:G496S	Apr	0	16071	19172	1718208	1.12
Sonneberg	S:G496S	Apr	0	16072	864	308999	0.28
Saalfeld-Rudolstadt	S:G496S	Apr	0	16073	18914	973230	1.94
Saale-Holzland-Kreis	S:G496S	Apr	0	16074	206227	1634617	12.62
Saale-Orla-Kreis	S:G496S	Apr	0	16075	268906	846949	31.75
Greiz	S:G496S	Apr	1	16076	235363	1262048	18.65
Altenburger Land	S:G496S	Apr	0	16077	127291	254975	49.92
Erfurt	S:G496S	May	0	16051	49985	1976945	2.53
Gera	S:G496S	May	1	16052	1328102	1649926	80.49
Jena	S:G496S	May	0	16053	72029	1133019	6.36
Suhl	S:G496S	May	0	16054	410	446833	0.09
Weimar	S:G496S	May	0	16055	14754	845242	1.75
Eisenach	S:G496S	May	0	16056	6283	539656	1.16
Eichsfeld	S:G496S	May	1	16061	46235	321420	14.38
Nordhausen	S:G496S	May	1	16062	100086	301750	33.17
Wartburgkreis	S:G496S	May	0	16063	17480	682749	2.56
Unstrut-Hainich-Kreis	S:G496S	May	0	16064	215303	697656	30.86
Kyffhaeuserkreis	S:G496S	May	0	16065	71563	420365	17.02
Schmalkalden-Meiningen	S:G496S	May	0	16066	7249	919297	0.79
Gotha	S:G496S	May	0	16067	25075	1142780	2.19
Soemmerda	S:G496S	May	0	16068	16743	1112321	1.51
Hildburghausen	S:G496S	May	0	16069	2218	434394	0.51
Ilm-Kreis	S:G496S	May	0	16070	16247	1089974	1.49
Weimarer Land	S:G496S	May	0	16071	28371	1490361	1.9
Sonneberg	S:G496S	May	0	16072	2332	270293	0.86
Saalfeld-Rudolstadt	S:G496S	May	0	16073	35097	862695	4.07
Saale-Holzland-Kreis	S:G496S	May	0	16074	368010	1471664	25.01
Saale-Orla-Kreis	S:G496S	May	1	16075	533200	930589	57.3
Greiz	S:G496S	May	1	16076	288171	865137	33.31
Altenburger Land	S:G496S	May	0	16077	235359	279916	84.08
Erfurt	S:H49Y	Feb	0	16051	21074	853359	2.47
Gera	S:H49Y	Feb	0	16052	38711	404005	9.58
Jena	S:H49Y	Feb	1	16053	108624	442734	24.53
Suhl	S:H49Y	Feb	0	16054	439	194158	0.23
Weimar	S:H49Y	Feb	0	16055	25318	364470	6.95
Eisenach	S:H49Y	Feb	0	16056	927	243024	0.38
Eichsfeld	S:H49Y	Feb	0	16061	647	158112	0.41
Nordhausen	S:H49Y	Feb	0	16062	739	139256	0.53
Wartburgkreis	S:H49Y	Feb	0	16063	2281	279078	0.82
Unstrut-Hainich-Kreis	S:H49Y	Feb	0	16064	1639	296583	0.55
Kyffhaeuserkreis	S:H49Y	Feb	0	16065	1243	204971	0.61
Schmalkalden-Meiningen	S:H49Y	Feb	0	16066	2283	381295	0.6
Gotha	S:H49Y	Feb	0	16067	5768	494074	1.17
Soemmerda	S:H49Y	Feb	0	16068	4835	463605	1.04
Hildburghausen	S:H49Y	Feb	0	16069	845	182368	0.46
Ilm-Kreis	S:H49Y	Feb	0	16070	7304	489481	1.49
Weimarer Land	S:H49Y	Feb	0	16071	100169	645918	15.51
Sonneberg	S:H49Y	Feb	0	16072	897	114061	0.79
Saalfeld-Rudolstadt	S:H49Y	Feb	0	16073	29531	356992	8.27
Saale-Holzland-Kreis	S:H49Y	Feb	1	16074	349623	636284	54.95
Saale-Orla-Kreis	S:H49Y	Feb	0	16075	33440	275908	12.12
Greiz	S:H49Y	Feb	0	16076	41603	525322	7.92
Altenburger Land	S:H49Y	Feb	0	16077	4989	85788	5.82
Erfurt	S:H49Y	Mar	0	16051	249147	2414625	10.32
Gera	S:H49Y	Mar	1	16052	334667	1115871	29.99
Jena	S:H49Y	Mar	1	16053	599144	1151491	52.03
Suhl	S:H49Y	Mar	0	16054	3064	550095	0.56
Weimar	S:H49Y	Mar	0	16055	118109	1057769	11.17
Eisenach	S:H49Y	Mar	0	16056	8431	703760	1.2
Eichsfeld	S:H49Y	Mar	1	16061	32737	444882	7.36
Nordhausen	S:H49Y	Mar	0	16062	24360	394625	6.17
Wartburgkreis	S:H49Y	Mar	0	16063	27066	791365	3.42
Unstrut-Hainich-Kreis	S:H49Y	Mar	1	16064	47404	857673	5.53
Kyffhaeuserkreis	S:H49Y	Mar	0	16065	64239	584263	10.99
Schmalkalden-Meiningen	S:H49Y	Mar	0	16066	12476	1067851	1.17
Gotha	S:H49Y	Mar	0	16067	66067	1398071	4.73
Soemmerda	S:H49Y	Mar	1	16068	29825	1343508	2.22
Hildburghausen	S:H49Y	Mar	0	16069	4191	522539	0.8
Ilm-Kreis	S:H49Y	Mar	0	16070	42494	1357858	3.13
Weimarer Land	S:H49Y	Mar	0	16071	436806	1876020	23.28
Sonneberg	S:H49Y	Mar	0	16072	4052	321004	1.26
Saalfeld-Rudolstadt	S:H49Y	Mar	0	16073	127861	1017588	12.57
Saale-Holzland-Kreis	S:H49Y	Mar	1	16074	1301732	2062928	63.1
Saale-Orla-Kreis	S:H49Y	Mar	0	16075	209827	762773	27.51
Greiz	S:H49Y	Mar	1	16076	281388	1440431	19.53
Altenburger Land	S:H49Y	Mar	0	16077	56916	247548	22.99
Erfurt	S:H49Y	Apr	1	16051	1225144	2142337	57.19
Gera	S:H49Y	Apr	1	16052	844603	929166	90.9
Jena	S:H49Y	Apr	1	16053	643500	847872	75.9
Suhl	S:H49Y	Apr	0	16054	16952	513947	3.3
Weimar	S:H49Y	Apr	1	16055	455886	780096	58.44
Eisenach	S:H49Y	Apr	0	16056	70461	630642	11.17
Eichsfeld	S:H49Y	Apr	1	16061	322954	489291	66
Nordhausen	S:H49Y	Apr	0	16062	205426	384455	53.43
Wartburgkreis	S:H49Y	Apr	0	16063	247703	750111	33.02
Unstrut-Hainich-Kreis	S:H49Y	Apr	1	16064	401368	789867	50.81
Kyffhaeuserkreis	S:H49Y	Apr	0	16065	353771	569361	62.13
Schmalkalden-Meiningen	S:H49Y	Apr	0	16066	77568	995281	7.79
Gotha	S:H49Y	Apr	1	16067	434012	1263243	34.36
Soemmerda	S:H49Y	Apr	1	16068	371790	1104348	33.67
Hildburghausen	S:H49Y	Apr	0	16069	20442	495861	4.12
Ilm-Kreis	S:H49Y	Apr	0	16070	293867	1114457	26.37
Weimarer Land	S:H49Y	Apr	1	16071	1132285	1569092	72.16
Sonneberg	S:H49Y	Apr	0	16072	9939	305341	3.26
Saalfeld-Rudolstadt	S:H49Y	Apr	0	16073	210935	906177	23.28
Saale-Holzland-Kreis	S:H49Y	Apr	1	16074	1372932	1653894	83.01
Saale-Orla-Kreis	S:H49Y	Apr	0	16075	477605	736420	64.85
Greiz	S:H49Y	Apr	1	16076	2011937	2348157	85.68
Altenburger Land	S:H49Y	Apr	1	16077	325186	343054	94.79
Erfurt	S:H49Y	May	1	16051	1172106	1590999	73.67
Gera	S:H49Y	May	1	16052	651031	696173	93.52
Jena	S:H49Y	May	1	16053	522015	602420	86.65
Suhl	S:H49Y	May	0	16054	22366	340642	6.57
Weimar	S:H49Y	May	1	16055	387981	446657	86.86
Eisenach	S:H49Y	May	0	16056	77186	418578	18.44
Eichsfeld	S:H49Y	May	1	16061	300715	398661	75.43
Nordhausen	S:H49Y	May	0	16062	136690	236251	57.86
Wartburgkreis	S:H49Y	May	0	16063	277635	537028	51.7
Unstrut-Hainich-Kreis	S:H49Y	May	1	16064	338958	507805	66.75
Kyffhaeuserkreis	S:H49Y	May	0	16065	343335	448076	76.62
Schmalkalden-Meiningen	S:H49Y	May	0	16066	110894	680838	16.29
Gotha	S:H49Y	May	1	16067	452530	870931	51.96
Soemmerda	S:H49Y	May	1	16068	482601	673835	71.62
Hildburghausen	S:H49Y	May	0	16069	23175	329838	7.03
Ilm-Kreis	S:H49Y	May	0	16070	385658	698769	55.19
Weimarer Land	S:H49Y	May	1	16071	830196	975719	85.09
Sonneberg	S:H49Y	May	0	16072	10670	204824	5.21
Saalfeld-Rudolstadt	S:H49Y	May	0	16073	167512	595203	28.14
Saale-Holzland-Kreis	S:H49Y	May	1	16074	784600	927362	84.61
Saale-Orla-Kreis	S:H49Y	May	0	16075	362151	528487	68.53
Greiz	S:H49Y	May	1	16076	1341590	1556148	86.21
Altenburger Land	S:H49Y	May	1	16077	238433	247188	96.46
Erfurt	S:N185D	Feb	0	16051	174557	929262	18.78
Gera	S:N185D	Feb	0	16052	3469	446756	0.78
Jena	S:N185D	Feb	0	16053	5425	526220	1.03
Suhl	S:N185D	Feb	0	16054	8309	212322	3.91
Weimar	S:N185D	Feb	0	16055	9924	396092	2.51
Eisenach	S:N185D	Feb	1	16056	137177	264999	51.77
Eichsfeld	S:N185D	Feb	0	16061	7151	171621	4.17
Nordhausen	S:N185D	Feb	0	16062	3407	151937	2.24
Wartburgkreis	S:N185D	Feb	1	16063	80842	303500	26.64
Unstrut-Hainich-Kreis	S:N185D	Feb	0	16064	89353	322672	27.69
Kyffhaeuserkreis	S:N185D	Feb	0	16065	6135	222837	2.75
Schmalkalden-Meiningen	S:N185D	Feb	0	16066	123551	413894	29.85
Gotha	S:N185D	Feb	1	16067	48647	539533	9.02
Soemmerda	S:N185D	Feb	0	16068	35524	504476	7.04
Hildburghausen	S:N185D	Feb	0	16069	5902	198884	2.97
Ilm-Kreis	S:N185D	Feb	0	16070	110284	534255	20.64
Weimarer Land	S:N185D	Feb	0	16071	17463	699566	2.5
Sonneberg	S:N185D	Feb	0	16072	1801	124045	1.45
Saalfeld-Rudolstadt	S:N185D	Feb	0	16073	7072	388575	1.82
Saale-Holzland-Kreis	S:N185D	Feb	0	16074	7618	646357	1.18
Saale-Orla-Kreis	S:N185D	Feb	0	16075	2388	303597	0.79
Greiz	S:N185D	Feb	0	16076	3210	579895	0.55
Altenburger Land	S:N185D	Feb	0	16077	1718	93896	1.83
Erfurt	S:N185D	Mar	0	16051	503849	2472528	20.38
Gera	S:N185D	Mar	0	16052	12127	1176163	1.03
Jena	S:N185D	Mar	0	16053	18198	1395484	1.3
Suhl	S:N185D	Mar	0	16054	28244	553476	5.1
Weimar	S:N185D	Mar	0	16055	31335	1049163	2.99
Eisenach	S:N185D	Mar	1	16056	804967	907902	88.66
Eichsfeld	S:N185D	Mar	0	16061	28638	454043	6.31
Nordhausen	S:N185D	Mar	0	16062	11816	399052	2.96
Wartburgkreis	S:N185D	Mar	1	16063	224178	805971	27.81
Unstrut-Hainich-Kreis	S:N185D	Mar	0	16064	340620	916259	37.18
Kyffhaeuserkreis	S:N185D	Mar	0	16065	21063	597284	3.53
Schmalkalden-Meiningen	S:N185D	Mar	0	16066	612278	1207153	50.72
Gotha	S:N185D	Mar	1	16067	313805	1489623	21.07
Soemmerda	S:N185D	Mar	0	16068	107252	1350412	7.94
Hildburghausen	S:N185D	Mar	0	16069	21096	525402	4.02
Ilm-Kreis	S:N185D	Mar	0	16070	301800	1377724	21.91
Weimarer Land	S:N185D	Mar	0	16071	58530	1848039	3.17
Sonneberg	S:N185D	Mar	0	16072	6416	321522	2
Saalfeld-Rudolstadt	S:N185D	Mar	0	16073	24421	1021382	2.39
Saale-Holzland-Kreis	S:N185D	Mar	0	16074	25975	1707440	1.52
Saale-Orla-Kreis	S:N185D	Mar	0	16075	8463	793145	1.07
Greiz	S:N185D	Mar	0	16076	11287	1494474	0.76
Altenburger Land	S:N185D	Mar	0	16077	5691	255260	2.23
Erfurt	S:N185D	Apr	0	16051	1500977	3155249	47.57
Gera	S:N185D	Apr	0	16052	36773	1102744	3.33
Jena	S:N185D	Apr	1	16053	58617	1312722	4.47
Suhl	S:N185D	Apr	0	16054	69946	547265	12.78
Weimar	S:N185D	Apr	1	16055	87294	989229	8.82
Eisenach	S:N185D	Apr	1	16056	574088	640190	89.67
Eichsfeld	S:N185D	Apr	0	16061	94009	259824	36.18
Nordhausen	S:N185D	Apr	0	16062	32444	365365	8.88
Wartburgkreis	S:N185D	Apr	1	16063	733585	1184500	61.93
Unstrut-Hainich-Kreis	S:N185D	Apr	1	16064	665347	1206672	55.14
Kyffhaeuserkreis	S:N185D	Apr	0	16065	66665	529903	12.58
Schmalkalden-Meiningen	S:N185D	Apr	0	16066	675294	1208593	55.87
Gotha	S:N185D	Apr	1	16067	191527	1112827	17.21
Soemmerda	S:N185D	Apr	0	16068	336790	1417702	23.76
Hildburghausen	S:N185D	Apr	1	16069	47985	527895	9.09
Ilm-Kreis	S:N185D	Apr	0	16070	903603	1854314	48.73
Weimarer Land	S:N185D	Apr	0	16071	275375	1531185	17.98
Sonneberg	S:N185D	Apr	0	16072	18465	311445	5.93
Saalfeld-Rudolstadt	S:N185D	Apr	0	16073	77904	976280	7.98
Saale-Holzland-Kreis	S:N185D	Apr	0	16074	163883	1162587	14.1
Saale-Orla-Kreis	S:N185D	Apr	0	16075	26704	755196	3.54
Greiz	S:N185D	Apr	0	16076	31257	1405483	2.22
Altenburger Land	S:N185D	Apr	0	16077	14429	240989	5.99
Erfurt	S:N185D	May	0	16051	67518	123193	54.81
Gera	S:N185D	May	0	16052	1303	35156	3.71
Jena	S:N185D	May	1	16053	3434	45956	7.47
Suhl	S:N185D	May	0	16054	4030	15870	25.39
Weimar	S:N185D	May	1	16055	3523	36711	9.6
Eisenach	S:N185D	May	1	16056	22054	24209	91.1
Eichsfeld	S:N185D	May	0	16061	3969	10004	39.67
Nordhausen	S:N185D	May	0	16062	1206	11985	10.06
Wartburgkreis	S:N185D	May	1	16063	38001	56964	66.71
Unstrut-Hainich-Kreis	S:N185D	May	1	16064	29703	49590	59.9
Kyffhaeuserkreis	S:N185D	May	0	16065	3542	20036	17.68
Schmalkalden-Meiningen	S:N185D	May	0	16066	41729	55955	74.58
Gotha	S:N185D	May	1	16067	8788	41345	21.26
Soemmerda	S:N185D	May	0	16068	15903	55070	28.88
Hildburghausen	S:N185D	May	1	16069	2233	19321	11.56
Ilm-Kreis	S:N185D	May	0	16070	40638	70651	57.52
Weimarer Land	S:N185D	May	0	16071	18696	52241	35.79
Sonneberg	S:N185D	May	0	16072	1567	10303	15.21
Saalfeld-Rudolstadt	S:N185D	May	0	16073	3544	37711	9.4
Saale-Holzland-Kreis	S:N185D	May	0	16074	7355	32687	22.5
Saale-Orla-Kreis	S:N185D	May	0	16075	1316	28756	4.58
Greiz	S:N185D	May	0	16076	1109	48469	2.29
Altenburger Land	S:N185D	May	0	16077	536	6682	8.02
Erfurt	S:N354K	Feb	0	16051	17445	522855	3.34
Gera	S:N354K	Feb	0	16052	965	250322	0.39
Jena	S:N354K	Feb	0	16053	1941	295400	0.66
Suhl	S:N354K	Feb	0	16054	96887	150783	64.26
Weimar	S:N354K	Feb	0	16055	2336	222435	1.05
Eisenach	S:N354K	Feb	0	16056	56411	86204	65.44
Eichsfeld	S:N354K	Feb	0	16061	1530	96407	1.59
Nordhausen	S:N354K	Feb	0	16062	680	86648	0.78
Wartburgkreis	S:N354K	Feb	1	16063	113846	211971	53.71
Unstrut-Hainich-Kreis	S:N354K	Feb	0	16064	13595	167903	8.1
Kyffhaeuserkreis	S:N354K	Feb	0	16065	869	125049	0.69
Schmalkalden-Meiningen	S:N354K	Feb	1	16066	33311	185052	18
Gotha	S:N354K	Feb	0	16067	60190	288833	20.84
Soemmerda	S:N354K	Feb	0	16068	2738	282869	0.97
Hildburghausen	S:N354K	Feb	0	16069	57040	129299	44.11
Ilm-Kreis	S:N354K	Feb	0	16070	27601	303834	9.08
Weimarer Land	S:N354K	Feb	0	16071	3412	390402	0.87
Sonneberg	S:N354K	Feb	0	16072	2770	68922	4.02
Saalfeld-Rudolstadt	S:N354K	Feb	0	16073	3366	218154	1.54
Saale-Holzland-Kreis	S:N354K	Feb	0	16074	1784	361086	0.49
Saale-Orla-Kreis	S:N354K	Feb	0	16075	878	170166	0.52
Greiz	S:N354K	Feb	0	16076	814	325047	0.25
Altenburger Land	S:N354K	Feb	0	16077	232	53210	0.44
Erfurt	S:N354K	Mar	0	16051	156794	2373041	6.61
Gera	S:N354K	Mar	0	16052	6665	1172976	0.57
Jena	S:N354K	Mar	0	16053	16343	1379310	1.18
Suhl	S:N354K	Mar	0	16054	478420	725131	65.98
Weimar	S:N354K	Mar	1	16055	15753	1043954	1.51
Eisenach	S:N354K	Mar	0	16056	414995	549377	75.54
Eichsfeld	S:N354K	Mar	0	16061	12418	445833	2.79
Nordhausen	S:N354K	Mar	0	16062	5791	396175	1.46
Wartburgkreis	S:N354K	Mar	1	16063	559443	992823	56.35
Unstrut-Hainich-Kreis	S:N354K	Mar	0	16064	106480	820544	12.98
Kyffhaeuserkreis	S:N354K	Mar	0	16065	7759	591869	1.31
Schmalkalden-Meiningen	S:N354K	Mar	1	16066	260596	946811	27.52
Gotha	S:N354K	Mar	1	16067	374093	1389614	26.92
Soemmerda	S:N354K	Mar	0	16068	28470	1325439	2.15
Hildburghausen	S:N354K	Mar	0	16069	292726	624160	46.9
Ilm-Kreis	S:N354K	Mar	1	16070	154107	1379142	11.17
Weimarer Land	S:N354K	Mar	0	16071	66096	1699302	3.89
Sonneberg	S:N354K	Mar	0	16072	17288	322410	5.36
Saalfeld-Rudolstadt	S:N354K	Mar	0	16073	36149	999215	3.62
Saale-Holzland-Kreis	S:N354K	Mar	0	16074	15373	1695239	0.91
Saale-Orla-Kreis	S:N354K	Mar	0	16075	5863	790221	0.74
Greiz	S:N354K	Mar	0	16076	6417	1491223	0.43
Altenburger Land	S:N354K	Mar	0	16077	2192	253533	0.86
Erfurt	S:N354K	Apr	1	16051	1603488	2579864	62.15
Gera	S:N354K	Apr	0	16052	47568	1088039	4.37
Jena	S:N354K	Apr	1	16053	115428	1268164	9.1
Suhl	S:N354K	Apr	0	16054	874084	912516	95.79
Weimar	S:N354K	Apr	1	16055	206878	948772	21.8
Eisenach	S:N354K	Apr	0	16056	721319	752033	95.92
Eichsfeld	S:N354K	Apr	1	16061	88234	321094	27.48
Nordhausen	S:N354K	Apr	0	16062	95975	313517	30.61
Wartburgkreis	S:N354K	Apr	1	16063	1117964	1222581	91.44
Unstrut-Hainich-Kreis	S:N354K	Apr	1	16064	532984	776544	68.64
Kyffhaeuserkreis	S:N354K	Apr	0	16065	160180	506910	31.6
Schmalkalden-Meiningen	S:N354K	Apr	1	16066	770110	1092107	70.52
Gotha	S:N354K	Apr	1	16067	1254293	1557180	80.55
Soemmerda	S:N354K	Apr	1	16068	612685	1132309	54.11
Hildburghausen	S:N354K	Apr	1	16069	576732	807463	71.43
Ilm-Kreis	S:N354K	Apr	1	16070	762072	1268560	60.07
Weimarer Land	S:N354K	Apr	0	16071	669599	1163701	57.54
Sonneberg	S:N354K	Apr	0	16072	122867	323485	37.98
Saalfeld-Rudolstadt	S:N354K	Apr	0	16073	508783	1120005	45.43
Saale-Holzland-Kreis	S:N354K	Apr	0	16074	240055	1135872	21.13
Saale-Orla-Kreis	S:N354K	Apr	0	16075	48652	750194	6.49
Greiz	S:N354K	Apr	0	16076	43198	1395104	3.1
Altenburger Land	S:N354K	Apr	0	16077	16847	234549	7.18
Erfurt	S:N354K	May	1	16051	1604791	1923092	83.45
Gera	S:N354K	May	0	16052	38528	663085	5.81
Jena	S:N354K	May	1	16053	97290	791887	12.29
Suhl	S:N354K	May	0	16054	560205	568950	98.46
Weimar	S:N354K	May	1	16055	192019	592995	32.38
Eisenach	S:N354K	May	0	16056	428704	437332	98.03
Eichsfeld	S:N354K	May	1	16061	86169	130614	65.97
Nordhausen	S:N354K	May	1	16062	78020	168981	46.17
Wartburgkreis	S:N354K	May	1	16063	867720	894809	96.97
Unstrut-Hainich-Kreis	S:N354K	May	1	16064	505962	574507	88.07
Kyffhaeuserkreis	S:N354K	May	0	16065	193389	243974	79.27
Schmalkalden-Meiningen	S:N354K	May	1	16066	633618	809569	78.27
Gotha	S:N354K	May	1	16067	831862	908223	91.59
Soemmerda	S:N354K	May	1	16068	549465	776825	70.73
Hildburghausen	S:N354K	May	1	16069	351866	491074	71.65
Ilm-Kreis	S:N354K	May	1	16070	768125	1016211	75.59
Weimarer Land	S:N354K	May	0	16071	535253	716347	74.72
Sonneberg	S:N354K	May	0	16072	103559	223164	46.4
Saalfeld-Rudolstadt	S:N354K	May	0	16073	376440	740132	50.86
Saale-Holzland-Kreis	S:N354K	May	0	16074	180812	586293	30.84
Saale-Orla-Kreis	S:N354K	May	0	16075	39778	469936	8.46
Greiz	S:N354K	May	0	16076	35837	857999	4.18
Altenburger Land	S:N354K	May	0	16077	14602	149301	9.78
Erfurt	S:N703D	Mar	1	16051	922106	1894328	48.68
Gera	S:N703D	Mar	0	16052	11533	873351	1.32
Jena	S:N703D	Mar	0	16053	29339	1029424	2.85
Suhl	S:N703D	Mar	0	16054	32451	403039	8.05
Weimar	S:N703D	Mar	0	16055	78938	760322	10.38
Eisenach	S:N703D	Mar	0	16056	56730	541231	10.48
Eichsfeld	S:N703D	Mar	1	16061	17356	335070	5.18
Nordhausen	S:N703D	Mar	0	16062	38210	277751	13.76
Wartburgkreis	S:N703D	Mar	0	16063	203708	670511	30.38
Unstrut-Hainich-Kreis	S:N703D	Mar	0	16064	230703	666990	34.59
Kyffhaeuserkreis	S:N703D	Mar	0	16065	168925	427817	39.49
Schmalkalden-Meiningen	S:N703D	Mar	0	16066	131290	823420	15.94
Gotha	S:N703D	Mar	1	16067	160547	956473	16.79
Soemmerda	S:N703D	Mar	1	16068	167794	957557	17.52
Hildburghausen	S:N703D	Mar	0	16069	30919	379467	8.15
Ilm-Kreis	S:N703D	Mar	1	16070	298865	1062869	28.12
Weimarer Land	S:N703D	Mar	0	16071	199028	1322463	15.05
Sonneberg	S:N703D	Mar	0	16072	13028	234068	5.57
Saalfeld-Rudolstadt	S:N703D	Mar	0	16073	78911	725091	10.88
Saale-Holzland-Kreis	S:N703D	Mar	0	16074	26909	1263807	2.13
Saale-Orla-Kreis	S:N703D	Mar	0	16075	10007	586664	1.71
Greiz	S:N703D	Mar	0	16076	10098	1105596	0.91
Altenburger Land	S:N703D	Mar	0	16077	5013	189088	2.65
Erfurt	S:N703D	Apr	1	16051	2408250	3056021	78.8
Gera	S:N703D	Apr	0	16052	32278	1104556	2.92
Jena	S:N703D	Apr	0	16053	93818	1253109	7.49
Suhl	S:N703D	Apr	0	16054	70286	498226	14.11
Weimar	S:N703D	Apr	1	16055	202767	937008	21.64
Eisenach	S:N703D	Apr	0	16056	156666	679439	23.06
Eichsfeld	S:N703D	Apr	1	16061	349982	492175	71.11
Nordhausen	S:N703D	Apr	0	16062	238396	305911	77.93
Wartburgkreis	S:N703D	Apr	0	16063	571715	950672	60.14
Unstrut-Hainich-Kreis	S:N703D	Apr	1	16064	626604	827499	75.72
Kyffhaeuserkreis	S:N703D	Apr	1	16065	563769	747780	75.39
Schmalkalden-Meiningen	S:N703D	Apr	0	16066	287085	1073212	26.75
Gotha	S:N703D	Apr	1	16067	589064	1048774	56.17
Soemmerda	S:N703D	Apr	1	16068	568690	852149	66.74
Hildburghausen	S:N703D	Apr	0	16069	70822	466921	15.17
Ilm-Kreis	S:N703D	Apr	1	16070	685043	1254627	54.6
Weimarer Land	S:N703D	Apr	0	16071	663348	1331149	49.83
Sonneberg	S:N703D	Apr	0	16072	28121	291891	9.63
Saalfeld-Rudolstadt	S:N703D	Apr	0	16073	173441	838257	20.69
Saale-Holzland-Kreis	S:N703D	Apr	0	16074	73651	1586287	4.64
Saale-Orla-Kreis	S:N703D	Apr	0	16075	25717	759737	3.38
Greiz	S:N703D	Apr	0	16076	28234	1408688	2
Altenburger Land	S:N703D	Apr	0	16077	12340	236230	5.22
Erfurt	S:N703D	May	1	16051	613371	759053	80.81
Gera	S:N703D	May	0	16052	7806	256048	3.05
Jena	S:N703D	May	0	16053	25355	293103	8.65
Suhl	S:N703D	May	0	16054	16625	117393	14.16
Weimar	S:N703D	May	1	16055	55978	228710	24.48
Eisenach	S:N703D	May	0	16056	34493	155959	22.12
Eichsfeld	S:N703D	May	1	16061	84985	116339	73.05
Nordhausen	S:N703D	May	0	16062	69631	73749	94.42
Wartburgkreis	S:N703D	May	0	16063	119172	210979	56.49
Unstrut-Hainich-Kreis	S:N703D	May	1	16064	154633	197465	78.31
Kyffhaeuserkreis	S:N703D	May	1	16065	155318	195359	79.5
Schmalkalden-Meiningen	S:N703D	May	0	16066	64004	253088	25.29
Gotha	S:N703D	May	1	16067	157384	265867	59.2
Soemmerda	S:N703D	May	1	16068	161111	208412	77.3
Hildburghausen	S:N703D	May	0	16069	16850	110818	15.21
Ilm-Kreis	S:N703D	May	1	16070	149874	285026	52.58
Weimarer Land	S:N703D	May	0	16071	186137	300878	61.86
Sonneberg	S:N703D	May	0	16072	6958	69215	10.05
Saalfeld-Rudolstadt	S:N703D	May	0	16073	43884	198663	22.09
Saale-Holzland-Kreis	S:N703D	May	0	16074	18276	368784	4.96
Saale-Orla-Kreis	S:N703D	May	0	16075	6640	177396	3.74
Greiz	S:N703D	May	0	16076	6956	325436	2.14
Altenburger Land	S:N703D	May	0	16077	2994	56675	5.28
Erfurt	S:S939F	Feb	0	16051	9120	1293534	0.71
Gera	S:S939F	Feb	0	16052	540139	731562	73.83
Jena	S:S939F	Feb	0	16053	28615	728348	3.93
Suhl	S:S939F	Feb	0	16054	119	303967	0.04
Weimar	S:S939F	Feb	0	16055	4517	550459	0.82
Eisenach	S:S939F	Feb	0	16056	598	370636	0.16
Eichsfeld	S:S939F	Feb	0	16061	245	237930	0.1
Nordhausen	S:S939F	Feb	0	16062	436	208339	0.21
Wartburgkreis	S:S939F	Feb	0	16063	2035	427235	0.48
Unstrut-Hainich-Kreis	S:S939F	Feb	0	16064	864	444733	0.19
Kyffhaeuserkreis	S:S939F	Feb	0	16065	404	308162	0.13
Schmalkalden-Meiningen	S:S939F	Feb	0	16066	1558	591743	0.26
Gotha	S:S939F	Feb	0	16067	4795	754847	0.64
Soemmerda	S:S939F	Feb	0	16068	1807	703432	0.26
Hildburghausen	S:S939F	Feb	0	16069	511	286938	0.18
Ilm-Kreis	S:S939F	Feb	0	16070	4487	754284	0.59
Weimarer Land	S:S939F	Feb	0	16071	9297	982460	0.95
Sonneberg	S:S939F	Feb	0	16072	1456	178787	0.81
Saalfeld-Rudolstadt	S:S939F	Feb	0	16073	54361	519016	10.47
Saale-Holzland-Kreis	S:S939F	Feb	0	16074	147220	913885	16.11
Saale-Orla-Kreis	S:S939F	Feb	1	16075	201255	468328	42.97
Greiz	S:S939F	Feb	1	16076	68461	772955	8.86
Altenburger Land	S:S939F	Feb	0	16077	76975	144679	53.2
Erfurt	S:S939F	Mar	0	16051	99073	1902434	5.21
Gera	S:S939F	Mar	1	16052	2788369	3020048	92.33
Jena	S:S939F	Mar	1	16053	299287	1076929	27.79
Suhl	S:S939F	Mar	0	16054	972	546951	0.18
Weimar	S:S939F	Mar	1	16055	37702	976823	3.86
Eisenach	S:S939F	Mar	0	16056	4803	701744	0.68
Eichsfeld	S:S939F	Mar	0	16061	2845	444785	0.64
Nordhausen	S:S939F	Mar	0	16062	4549	383427	1.19
Wartburgkreis	S:S939F	Mar	0	16063	14464	788238	1.83
Unstrut-Hainich-Kreis	S:S939F	Mar	0	16064	9367	820569	1.14
Kyffhaeuserkreis	S:S939F	Mar	0	16065	14462	438527	3.3
Schmalkalden-Meiningen	S:S939F	Mar	0	16066	10236	1059945	0.97
Gotha	S:S939F	Mar	0	16067	35923	1335006	2.69
Soemmerda	S:S939F	Mar	1	16068	14026	1321420	1.06
Hildburghausen	S:S939F	Mar	0	16069	3506	519290	0.68
Ilm-Kreis	S:S939F	Mar	0	16070	30354	1315244	2.31
Weimarer Land	S:S939F	Mar	0	16071	115550	1367443	8.45
Sonneberg	S:S939F	Mar	0	16072	6615	319110	2.07
Saalfeld-Rudolstadt	S:S939F	Mar	0	16073	240749	938745	25.65
Saale-Holzland-Kreis	S:S939F	Mar	1	16074	862816	1644692	52.46
Saale-Orla-Kreis	S:S939F	Mar	1	16075	1057708	1423275	74.32
Greiz	S:S939F	Mar	1	16076	770089	1044969	73.69
Altenburger Land	S:S939F	Mar	0	16077	457616	491605	93.09
Erfurt	S:S939F	Apr	1	16051	167470	1552397	10.79
Gera	S:S939F	Apr	1	16052	3974283	4033278	98.54
Jena	S:S939F	Apr	1	16053	908125	1228516	73.92
Suhl	S:S939F	Apr	0	16054	3278	506724	0.65
Weimar	S:S939F	Apr	1	16055	94232	858167	10.98
Eisenach	S:S939F	Apr	0	16056	10373	625598	1.66
Eichsfeld	S:S939F	Apr	1	16061	4841	412263	1.17
Nordhausen	S:S939F	Apr	0	16062	16217	238410	6.8
Wartburgkreis	S:S939F	Apr	0	16063	29545	736314	4.01
Unstrut-Hainich-Kreis	S:S939F	Apr	0	16064	30049	514592	5.84
Kyffhaeuserkreis	S:S939F	Apr	0	16065	21110	332574	6.35
Schmalkalden-Meiningen	S:S939F	Apr	0	16066	20651	993910	2.08
Gotha	S:S939F	Apr	0	16067	73264	1063352	6.89
Soemmerda	S:S939F	Apr	1	16068	46020	971669	4.74
Hildburghausen	S:S939F	Apr	0	16069	8046	486356	1.65
Ilm-Kreis	S:S939F	Apr	1	16070	63683	1055887	6.03
Weimarer Land	S:S939F	Apr	0	16071	349174	795876	43.87
Sonneberg	S:S939F	Apr	0	16072	10742	303012	3.55
Saalfeld-Rudolstadt	S:S939F	Apr	0	16073	342001	889694	38.44
Saale-Holzland-Kreis	S:S939F	Apr	1	16074	1624711	1916247	84.79
Saale-Orla-Kreis	S:S939F	Apr	1	16075	1625528	1896115	85.73
Greiz	S:S939F	Apr	1	16076	1685240	1748058	96.41
Altenburger Land	S:S939F	Apr	1	16077	716715	734055	97.64
Erfurt	S:S939F	May	1	16051	252505	1180407	21.39
Gera	S:S939F	May	1	16052	3629036	3663915	99.05
Jena	S:S939F	May	1	16053	930669	1169252	79.6
Suhl	S:S939F	May	0	16054	15937	392004	4.07
Weimar	S:S939F	May	1	16055	111982	687922	16.28
Eisenach	S:S939F	May	0	16056	12330	517370	2.38
Eichsfeld	S:S939F	May	1	16061	8742	351455	2.49
Nordhausen	S:S939F	May	0	16062	17435	173821	10.03
Wartburgkreis	S:S939F	May	0	16063	35246	633059	5.57
Unstrut-Hainich-Kreis	S:S939F	May	0	16064	36137	379640	9.52
Kyffhaeuserkreis	S:S939F	May	0	16065	24252	246414	9.84
Schmalkalden-Meiningen	S:S939F	May	0	16066	37467	831952	4.5
Gotha	S:S939F	May	0	16067	132651	639150	20.75
Soemmerda	S:S939F	May	1	16068	71957	547980	13.13
Hildburghausen	S:S939F	May	0	16069	25380	370204	6.86
Ilm-Kreis	S:S939F	May	1	16070	77438	761107	10.17
Weimarer Land	S:S939F	May	0	16071	432704	585008	73.97
Sonneberg	S:S939F	May	0	16072	19946	244639	8.15
Saalfeld-Rudolstadt	S:S939F	May	0	16073	400800	690084	58.08
Saale-Holzland-Kreis	S:S939F	May	1	16074	1606230	1833092	87.62
Saale-Orla-Kreis	S:S939F	May	1	16075	1548505	1774114	87.28
Greiz	S:S939F	May	1	16076	1739159	1776274	97.91
Altenburger Land	S:S939F	May	1	16077	697665	708219	98.51
Erfurt	S:T716V	Apr	0	16051	153918	2257135	6.82
Gera	S:T716V	Apr	0	16052	10687	1103718	0.97
Jena	S:T716V	Apr	1	16053	94230	1302177	7.24
Suhl	S:T716V	Apr	0	16054	2749	521608	0.53
Weimar	S:T716V	Apr	1	16055	44557	908436	4.9
Eisenach	S:T716V	Apr	0	16056	3312	636529	0.52
Eichsfeld	S:T716V	Apr	0	16061	2008	425135	0.47
Nordhausen	S:T716V	Apr	0	16062	3763	372875	1.01
Wartburgkreis	S:T716V	Apr	0	16063	7220	763054	0.95
Unstrut-Hainich-Kreis	S:T716V	Apr	0	16064	6583	819342	0.8
Kyffhaeuserkreis	S:T716V	Apr	0	16065	9198	566006	1.63
Schmalkalden-Meiningen	S:T716V	Apr	0	16066	7411	1023421	0.72
Gotha	S:T716V	Apr	0	16067	25608	1299997	1.97
Soemmerda	S:T716V	Apr	0	16068	71025	1267851	5.6
Hildburghausen	S:T716V	Apr	0	16069	3208	502096	0.64
Ilm-Kreis	S:T716V	Apr	0	16070	38123	1252674	3.04
Weimarer Land	S:T716V	Apr	1	16071	764708	1833358	41.71
Sonneberg	S:T716V	Apr	0	16072	1889	308647	0.61
Saalfeld-Rudolstadt	S:T716V	Apr	0	16073	42892	962388	4.46
Saale-Holzland-Kreis	S:T716V	Apr	0	16074	93302	1477383	6.32
Saale-Orla-Kreis	S:T716V	Apr	0	16075	9827	761890	1.29
Greiz	S:T716V	Apr	0	16076	9734	1408322	0.69
Altenburger Land	S:T716V	Apr	0	16077	2564	236510	1.08
Erfurt	S:T716V	May	0	16051	394473	1110429	35.52
Gera	S:T716V	May	0	16052	18064	573127	3.15
Jena	S:T716V	May	1	16053	168895	726177	23.26
Suhl	S:T716V	May	0	16054	4370	281421	1.55
Weimar	S:T716V	May	1	16055	273285	432429	63.2
Eisenach	S:T716V	May	0	16056	5768	341308	1.69
Eichsfeld	S:T716V	May	0	16061	3924	234625	1.67
Nordhausen	S:T716V	May	0	16062	8264	191350	4.32
Wartburgkreis	S:T716V	May	0	16063	13783	430714	3.2
Unstrut-Hainich-Kreis	S:T716V	May	0	16064	23842	442266	5.39
Kyffhaeuserkreis	S:T716V	May	0	16065	52677	257328	20.47
Schmalkalden-Meiningen	S:T716V	May	0	16066	12952	579712	2.23
Gotha	S:T716V	May	0	16067	58347	702431	8.31
Soemmerda	S:T716V	May	1	16068	122867	722986	16.99
Hildburghausen	S:T716V	May	0	16069	5586	273882	2.04
Ilm-Kreis	S:T716V	May	0	16070	76927	681134	11.29
Weimarer Land	S:T716V	May	1	16071	859523	1310411	65.59
Sonneberg	S:T716V	May	0	16072	3234	170709	1.89
Saalfeld-Rudolstadt	S:T716V	May	0	16073	84926	531852	15.97
Saale-Holzland-Kreis	S:T716V	May	0	16074	212792	529044	40.22
Saale-Orla-Kreis	S:T716V	May	0	16075	18665	406974	4.59
Greiz	S:T716V	May	0	16076	16708	744281	2.24
Altenburger Land	S:T716V	May	0	16077	4777	125848	3.8
Erfurt	S:V90F	Feb	0	16051	2064	438752	0.47
Gera	S:V90F	Feb	0	16052	141471	211423	66.91
Jena	S:V90F	Feb	0	16053	5632	249117	2.26
Suhl	S:V90F	Feb	0	16054	40	98342	0.04
Weimar	S:V90F	Feb	0	16055	942	188182	0.5
Eisenach	S:V90F	Feb	0	16056	139	125065	0.11
Eichsfeld	S:V90F	Feb	0	16061	75	82460	0.09
Nordhausen	S:V90F	Feb	0	16062	122	72899	0.17
Wartburgkreis	S:V90F	Feb	0	16063	557	144922	0.38
Unstrut-Hainich-Kreis	S:V90F	Feb	0	16064	253	154272	0.16
Kyffhaeuserkreis	S:V90F	Feb	0	16065	100	105724	0.09
Schmalkalden-Meiningen	S:V90F	Feb	0	16066	301	194654	0.15
Gotha	S:V90F	Feb	0	16067	994	254823	0.39
Soemmerda	S:V90F	Feb	0	16068	419	238950	0.18
Hildburghausen	S:V90F	Feb	0	16069	71	92894	0.08
Ilm-Kreis	S:V90F	Feb	0	16070	696	250527	0.28
Weimarer Land	S:V90F	Feb	0	16071	1963	331255	0.59
Sonneberg	S:V90F	Feb	0	16072	190	57640	0.33
Saalfeld-Rudolstadt	S:V90F	Feb	0	16073	2314	184772	1.25
Saale-Holzland-Kreis	S:V90F	Feb	0	16074	32751	305366	10.73
Saale-Orla-Kreis	S:V90F	Feb	0	16075	53571	144758	37.01
Greiz	S:V90F	Feb	1	16076	0	275997	0
Altenburger Land	S:V90F	Feb	0	16077	20573	44990	45.73
Erfurt	S:V90F	Mar	0	16051	23373	2426461	0.96
Gera	S:V90F	Mar	1	16052	1196058	1557915	76.77
Jena	S:V90F	Mar	1	16053	89720	1309947	6.85
Suhl	S:V90F	Mar	0	16054	333	549610	0.06
Weimar	S:V90F	Mar	0	16055	14856	1030650	1.44
Eisenach	S:V90F	Mar	0	16056	1964	704033	0.28
Eichsfeld	S:V90F	Mar	0	16061	1013	449045	0.23
Nordhausen	S:V90F	Mar	0	16062	1333	397267	0.34
Wartburgkreis	S:V90F	Mar	0	16063	5521	793609	0.7
Unstrut-Hainich-Kreis	S:V90F	Mar	0	16064	2500	863089	0.29
Kyffhaeuserkreis	S:V90F	Mar	0	16065	1077	594037	0.18
Schmalkalden-Meiningen	S:V90F	Mar	0	16066	3730	1066655	0.35
Gotha	S:V90F	Mar	0	16067	11685	1402908	0.83
Soemmerda	S:V90F	Mar	0	16068	5185	1340127	0.39
Hildburghausen	S:V90F	Mar	0	16069	1006	522228	0.19
Ilm-Kreis	S:V90F	Mar	0	16070	9578	1355135	0.71
Weimarer Land	S:V90F	Mar	0	16071	41658	1779976	2.34
Sonneberg	S:V90F	Mar	0	16072	1418	320486	0.44
Saalfeld-Rudolstadt	S:V90F	Mar	0	16073	30804	1004416	3.07
Saale-Holzland-Kreis	S:V90F	Mar	1	16074	380475	1566575	24.29
Saale-Orla-Kreis	S:V90F	Mar	0	16075	460663	912797	50.47
Greiz	S:V90F	Mar	1	16076	242667	1317980	18.41
Altenburger Land	S:V90F	Mar	0	16077	199321	293512	67.91
Erfurt	S:V90F	Apr	0	16051	68122	2242057	3.04
Gera	S:V90F	Apr	1	16052	1568972	1746282	89.85
Jena	S:V90F	Apr	1	16053	371492	832614	44.62
Suhl	S:V90F	Apr	0	16054	1317	520765	0.25
Weimar	S:V90F	Apr	0	16055	57277	937308	6.11
Eisenach	S:V90F	Apr	0	16056	4598	636068	0.72
Eichsfeld	S:V90F	Apr	0	16061	2354	424326	0.55
Nordhausen	S:V90F	Apr	0	16062	4195	371815	1.13
Wartburgkreis	S:V90F	Apr	0	16063	12485	760970	1.64
Unstrut-Hainich-Kreis	S:V90F	Apr	0	16064	6257	817759	0.77
Kyffhaeuserkreis	S:V90F	Apr	0	16065	4296	563940	0.76
Schmalkalden-Meiningen	S:V90F	Apr	0	16066	9159	1021544	0.9
Gotha	S:V90F	Apr	0	16067	27308	1294378	2.11
Soemmerda	S:V90F	Apr	0	16068	15765	1262469	1.25
Hildburghausen	S:V90F	Apr	0	16069	3194	500863	0.64
Ilm-Kreis	S:V90F	Apr	0	16070	25249	1246506	2.03
Weimarer Land	S:V90F	Apr	0	16071	201409	1562933	12.89
Sonneberg	S:V90F	Apr	0	16072	3636	307502	1.18
Saalfeld-Rudolstadt	S:V90F	Apr	0	16073	96246	910113	10.58
Saale-Holzland-Kreis	S:V90F	Apr	1	16074	1007902	1473783	68.39
Saale-Orla-Kreis	S:V90F	Apr	1	16075	674685	963987	69.99
Greiz	S:V90F	Apr	1	16076	858438	1298802	66.09
Altenburger Land	S:V90F	Apr	0	16077	311923	339164	91.97
Erfurt	S:V90F	May	0	16051	102009	1916675	5.32
Gera	S:V90F	May	1	16052	1721774	1837554	93.7
Jena	S:V90F	May	1	16053	420233	743876	56.49
Suhl	S:V90F	May	0	16054	2018	445213	0.45
Weimar	S:V90F	May	1	16055	72192	830264	8.7
Eisenach	S:V90F	May	0	16056	5879	539009	1.09
Eichsfeld	S:V90F	May	0	16061	4287	372669	1.15
Nordhausen	S:V90F	May	0	16062	5328	307697	1.73
Wartburgkreis	S:V90F	May	0	16063	16231	680285	2.39
Unstrut-Hainich-Kreis	S:V90F	May	0	16064	8908	722546	1.23
Kyffhaeuserkreis	S:V90F	May	0	16065	7000	481300	1.45
Schmalkalden-Meiningen	S:V90F	May	0	16066	12509	915617	1.37
Gotha	S:V90F	May	0	16067	36668	1132797	3.24
Soemmerda	S:V90F	May	0	16068	26394	1088204	2.43
Hildburghausen	S:V90F	May	0	16069	5114	431995	1.18
Ilm-Kreis	S:V90F	May	0	16070	36840	1069890	3.44
Weimarer Land	S:V90F	May	0	16071	336504	1055124	31.89
Sonneberg	S:V90F	May	0	16072	6478	266279	2.43
Saalfeld-Rudolstadt	S:V90F	May	0	16073	159670	689869	23.14
Saale-Holzland-Kreis	S:V90F	May	1	16074	1194244	1487613	80.28
Saale-Orla-Kreis	S:V90F	May	1	16075	762893	1015953	75.09
Greiz	S:V90F	May	1	16076	1040744	1185864	87.76
Altenburger Land	S:V90F	May	0	16077	361462	380838	94.91
