# Supplementary material for: Leveraging mobility data to analyze persistent SARS-CoV-2 mutations and inform targeted genomic surveillance
Source: eLife. 2025 Jan 15;13:RP94045. doi: 10.7554/eLife.94045 (PMC11735024; doi:10.7554/eLife.94045)
Supplement: Figure 3—source data 1. [file elife-94045-fig3-data1.xlsx]

## Sheet: Figure 3-source data 1
_id	Sample_ID	Lineage	Clade	Isolation_Date	PLZ	Location	Sampling	Searched_Lineage	Badge_Description	Comment	latitude	longitude
6384cecf2d62f13b94516bac	AN16141	BA.5.2.20	22B (Omicron)	20221022	99867	Gotha	randomized	FALSE	FALSE	enlarged routine batch	50.9482	10.7019
6384cecf2d62f13b94516ba9	AN16136	BF.7	22B (Omicron)	20221023	99638	Buechel	randomized	FALSE	FALSE	enlarged routine batch	51.25	11.15
6384cecf2d62f13b94516ba4	AN16094	BA.5.1.10	22B (Omicron)	20221024	98617	Meiningen	randomized	FALSE	FALSE	enlarged routine batch	50.5679	10.4152
6384cecf2d62f13b94516bab	AN16138	BA.5.2	22B (Omicron)	20221024	6578	Bilzingsleben	randomized	FALSE	FALSE	enlarged routine batch	51.2833	11.0667
6384cecf2d62f13b94516Bad	AN16142	BA.5.2	22B (Omicron)	20221024	99869	Sonneborn	randomized	FALSE	FALSE	enlarged routine batch	50.9927	10.5917
6384cecf2d62f13b94516bb3	AN16186	BA.5.9	22B (Omicron)	20221024	99625	Koelleda	randomized	FALSE	FALSE	enlarged routine batch	51.1875	11.2449
6384cecf2d62f13b94516bb5	AN16192	BF.7	22B (Omicron)	20221024	99638	Buechel	randomized	FALSE	FALSE	enlarged routine batch	51.25	11.15
6384cecf2d62f13b94516ba7	AN16112	BA.5.2.1	22B (Omicron)	20221024	37339	Breitenworbis	randomized	FALSE	FALSE	enlarged routine batch	51.4499	10.3433
6384cecf2d62f13b94516ba8	AN16131	BA.5.1.10	22B (Omicron)	20221024	99610	Soemmerda	randomized	FALSE	FALSE	enlarged routine batch	51.1591	11.1152
6384cecf2d62f13b94516baa	AN16137	BA.5.2	22B (Omicron)	20221024	99610	Soemmerda	randomized	FALSE	FALSE	enlarged routine batch	51.1591	11.1152
6384cecf2d62f13b94516bb0	AN16175	BA.5.2	22B (Omicron)	20221024	99625	Koelleda	randomized	FALSE	FALSE	enlarged routine batch	51.1875	11.2449
6384cecf2d62f13b94516bb2	AN16182	BA.5.1	22B (Omicron)	20221024	99610	Stoedten	randomized	FALSE	FALSE	enlarged routine batch	51.1872	11.1787
6384cecf2d62f13b94516ba6	AN16111	BQ.1.2	22E (Omicron)	20221024	37339	Leinefelde-Worbis	randomized	FALSE	FALSE	enlarged routine batch	51.4117	10.3358
6384cecf2d62f13b94516bb1	AN16179	BA.5.1.5	22B (Omicron)	20221024	99628	Buttstaedt	randomized	FALSE	FALSE	enlarged routine batch	51.1223	11.4172
6384cecf2d62f13b94516bb4	AN16188	BA.5.2.1	22B (Omicron)	20221024	99610	Soemmerda	randomized	FALSE	FALSE	enlarged routine batch	51.1591	11.1152
6384cecf2d62f13b94516bb6	AN16193	BF.7.1	22B (Omicron)	20221024	99610	Soemmerda	randomized	FALSE	FALSE	enlarged routine batch	51.1591	11.1152
6384cecf2d62f13b94516bb7	AN16195	BA.5.2	22B (Omicron)	20221024	99638	Kannawurf	randomized	FALSE	FALSE	enlarged routine batch	51.2667	11.1331
6384cecf2d62f13b94516bb8	AN16206	BF.7	22B (Omicron)	20221024	99198	Udestedt	randomized	FALSE	FALSE	enlarged routine batch	51.05	11.1333
6384cecf2d62f13b94516bb9	AN16208	Unassigned	22B (Omicron)	20221025	99867	Gotha	randomized	FALSE	FALSE	enlarged routine batch	50.9482	10.7019
6384cecf2d62f13b94516bbc	AN16234	BA.5.2.20	22B (Omicron)	20221025	99610	Vogelsberg	randomized	FALSE	FALSE	enlarged routine batch	51.1333	11.25
6384cecf2d62f13b94516bae	AN16144	BE.4.1	22B (Omicron)	20221025	37318	Dieterode	randomized	FALSE	FALSE	enlarged routine batch	51.3	10.1
6384cecf2d62f13b94516bba	AN16210	BA.5.2.18	22B (Omicron)	20221025	99887	Georgenthal	randomized	FALSE	FALSE	enlarged routine batch	50.8321	10.6627
6384cecf2d62f13b94516baf	AN16168	BA.5.2.1	22B (Omicron)	20221025	98597	Fambach	randomized	FALSE	FALSE	enlarged routine batch	50.7333	10.3667
6384cecf2d62f13b94516bbb	AN16227	BA.5.2.1	22B (Omicron)	20221025	98617	Untermaßfeld	randomized	FALSE	FALSE	enlarged routine batch	50.5441	10.3665
6384cecf2d62f13b94516bbd	AN16237	BA.5.2.1	22B (Omicron)	20221025	99610	Leubingen	randomized	FALSE	FALSE	enlarged routine batch	51.2011	11.1522
6384cecf2d62f13b94516bbe	AN16238	BA.5.2.1	22B (Omicron)	20221025	99638	Kindelbrueck	randomized	FALSE	FALSE	enlarged routine batch	51.2617	11.09
6384cecf2d62f13b94516bbf	AN16239	Unassigned	22B (Omicron)	20221025	99195	Schloßvippach	randomized	FALSE	FALSE	enlarged routine batch	51.105	11.1451
6384cecf2d62f13b94516bc0	AN16241	BE.1.1	22B (Omicron)	20221026	99974	Muehlhausen	randomized	FALSE	FALSE	enlarged routine batch	51.209	10.4528
6384cecf2d62f13b94516bc3	AN16263	BA.5.1.5	22B (Omicron)	20221026	99867	Gotha	randomized	FALSE	FALSE	enlarged routine batch	50.9482	10.7019
6384cecf2d62f13b94516bca	AN16284	BF.8	22B (Omicron)	20221026	36466	Dermbach	randomized	FALSE	FALSE	enlarged routine batch	50.7138	10.1184
6384cecf2d62f13b94516bcb	AN16291	BA.5.2	22B (Omicron)	20221026	36433	Bad Salzungen	randomized	FALSE	FALSE	enlarged routine batch	50.8134	10.2361
6384cecf2d62f13b94516bc1	AN16250	BF.7	22B (Omicron)	20221026	98646	Hildburghausen	randomized	FALSE	FALSE	enlarged routine batch	50.4255	10.7318
6384cecf2d62f13b94516bc6	AN16266	BF.7	22B (Omicron)	20221027	99867	Gotha	randomized	FALSE	FALSE	enlarged routine batch	50.9482	10.7019
6384cecf2d62f13b94516bc4	AN16264	BA.5.2.7	22B (Omicron)	20221027	99974	Muehlhausen	randomized	FALSE	FALSE	enlarged routine batch	51.209	10.4528
6384cecf2d62f13b94516bc5	AN16265	BA.5.2	22B (Omicron)	20221027	99887	Georgenthal	randomized	FALSE	FALSE	enlarged routine batch	50.8321	10.6627
6384cecf2d62f13b94516bc2	AN16253	BF.7.4	22B (Omicron)	20221027	96515	Sonneberg	randomized	FALSE	FALSE	enlarged routine batch	50.3592	11.1746
6384cecf2d62f13b94516bcc	AN16298	BF.5	22B (Omicron)	20221027	99638	Buechel	randomized	FALSE	FALSE	enlarged routine batch	51.25	11.15
6384cecf2d62f13b94516bc7	AN16273	BA.5.1	22B (Omicron)	20221028	37308	Heilbad Heiligenstadt	randomized	FALSE	FALSE	enlarged routine batch	51.3782	10.1374
6384cecf2d62f13b94516bc8	AN16275	BA.5.2	22B (Omicron)	20221028	37355	Niederorschel	randomized	FALSE	FALSE	enlarged routine batch	51.3722	10.4237
6384cecf2d62f13b94516bce	AN16325	BF.7	22B (Omicron)	20221028	36460	Krayenberggemeinde	randomized	FALSE	FALSE	enlarged routine batch	50.8361	10.0864
6384cecf2d62f13b94516bc9	AN16276	BF.7	22B (Omicron)	20221028	99706	Sondershausen	randomized	FALSE	FALSE	enlarged routine batch	51.3697	10.8701
6384cecf2d62f13b94516bcd	AN16311	BF.7	22B (Omicron)	20221029	99867	Gotha	randomized	FALSE	FALSE	enlarged routine batch	50.9482	10.7019
6384cecf2d62f13b94516bd0	AN16344	BF.7	22B (Omicron)	20221031	98544	Zella-Mehlis	randomized	FALSE	FALSE	enlarged routine batch	50.6564	10.6605
6384cecf2d62f13b94516bd2	AN16354	BA.5.1.5	22B (Omicron)	20221101	99869	Grabsleben	randomized	FALSE	FALSE	enlarged routine batch	50.9363	10.8351
6384cecf2d62f13b94516bcf	AN16333	BF.7	22B (Omicron)	20221101	36433	Bad Salzungen	randomized	FALSE	FALSE	enlarged routine batch	50.8134	10.2361
6384cecf2d62f13b94516bd1	AN16345	BF.7	22B (Omicron)	20221101	7958	Hohenleuben	randomized	FALSE	FALSE	enlarged routine batch	50.7113	12.0543
6384cecf2d62f13b94516bd3	AN16367	BE.4	22B (Omicron)	20221101	99869	Drei Gleichen	randomized	FALSE	FALSE	enlarged routine batch	50.8667	10.8167
6384cecf2d62f13b94516bd4	AN16393	BA.5.2	22B (Omicron)	20221103	37355	Niederorschel	randomized	FALSE	FALSE	enlarged routine batch	51.3722	10.4237
6384cecf2d62f13b94516bd6	AN16479	BF.7	22B (Omicron)	20221107	99625	Koelleda	randomized	FALSE	FALSE	enlarged routine batch	51.1875	11.2449
6384cecf2d62f13b94516bd5	AN16466	BQ.1.10	22E (Omicron)	20221108	36469	Bad Salzungen	randomized	FALSE	FALSE	enlarged routine batch	50.8134	10.2361
6384cecf2d62f13b94516bd7	AN16548	BF.7.5	22B (Omicron)	20221109	99867	Gotha	randomized	FALSE	FALSE	enlarged routine batch	50.9482	10.7019
6384cecf2d62f13b94516bd9	AN16663	BQ.1.8	22E (Omicron)	20221116	99610	Soemmerda	randomized	FALSE	FALSE	enlarged routine batch	51.1591	11.1152
6384cecf2d62f13b94516bd8	AN16659	BQ.1.1	22E (Omicron)	20221116	36433	Bad Salzungen	randomized	TRUE	16th Nov 2022	enlarged routine batch	50.8134	10.2361
6384cecf2d62f13b94516bda	AN16675	BA.5.1	22B (Omicron)	20221117	99625	Koelleda	randomized	FALSE	FALSE	enlarged routine batch	51.1875	11.2449
6384cecf2d62f13b94516bdb	AN16723	BF.7	22B (Omicron)	20221121	99638	Kindelbrueck	randomized	FALSE	FALSE	enlarged routine batch	51.2617	11.09
6384cecf2d62f13b94516bdc	AN16725	BA.5.2.6	22B (Omicron)	20221121	99634	Gangloffsoemmern	randomized	FALSE	FALSE	enlarged routine batch	51.1894	10.9433
6384cecf2d62f13b94516bdd	AN16726	BF.7	22B (Omicron)	20221121	99625	Battgendorf	randomized	FALSE	FALSE	enlarged routine batch	51.2044	11.2594
6384cecf2d62f13b94516bde	AN16727	BF.7	22B (Omicron)	20221121	99638	Kannawurf	randomized	FALSE	FALSE	enlarged routine batch	51.2667	11.1331
6384cecf2d62f13b94516bdf	AN16736	BN.1.3	22D (Omicron)	20221122	99610	Soemmerda	randomized	FALSE	FALSE	enlarged routine batch	51.1591	11.1152
636102847b0d926ff81766b5	AN15820	BA.5.2.1	22B (Omicron)	20221017	37308	Heilbad Heiligenstadt	guided	FALSE	FALSE	guided batch	51.3782	10.1374
636102847b0d926ff81766b6	AN15861	BQ.1.1	22E (Omicron)	20221017	37308	Heilbad Heiligenstadt	guided	TRUE	17th Oct 2022	guided batch	51.3782	10.1374
636102847b0d926ff81766ba	AN15925	BA.5.1	22B (Omicron)	20221017	99089	Erfurt	guided	FALSE	FALSE	guided batch	50.9781	11.0292
636102847b0d926ff81766b7	AN15865	BA.5.2	22B (Omicron)	20221018	37308	Heilbad Heiligenstadt	guided	FALSE	FALSE	guided batch	51.3782	10.1374
636102847b0d926ff81766b8	AN15881	BA.5.1	22B (Omicron)	20221018	37308	Heilbad Heiligenstadt	guided	FALSE	FALSE	guided batch	51.3782	10.1374
636102847b0d926ff81766b9	AN15882	Unassigned	22A (Omicron)	20221018	37308	Heilbad Heiligenstadt	guided	FALSE	FALSE	guided batch	51.3782	10.1374
636102847b0d926ff81766be	AN16018	Unassigned	nan	20221019	37359	Kuellstedt	guided	FALSE	FALSE	guided batch	51.2758	10.2804
636102847b0d926ff81766bb	AN15960	BA.5.1	22B (Omicron)	20221019	37308	Heilbad Heiligenstadt	guided	FALSE	FALSE	guided batch	51.3782	10.1374
636102847b0d926ff81766bc	AN15964	BA.5.1	22B (Omicron)	20221019	37308	Heilbad Heiligenstadt	guided	FALSE	FALSE	guided batch	51.3782	10.1374
636102847b0d926ff81766c1	AN16034	BA.5.1	22B (Omicron)	20221019	99610	Soemmerda	randomized	FALSE	FALSE	guided batch	51.1591	11.1152
636102847b0d926ff81766c2	AN16036	BA.5.1.3	22B (Omicron)	20221019	99625	Koelleda	randomized	FALSE	FALSE	guided batch	51.1875	11.2449
636102847b0d926ff81766bd	AN16013	BA.5.2	22B (Omicron)	20221020	37308	Heilbad Heiligenstadt	guided	FALSE	FALSE	guided batch	51.3782	10.1374
636102847b0d926ff81766c0	AN16020	BF.7	22B (Omicron)	20221020	37308	Heilbad Heiligenstadt	guided	FALSE	FALSE	guided batch	51.3782	10.1374
636102847b0d926ff81766bf	AN16019	BA.5.2.1	22B (Omicron)	20221020	37308	Heilbad Heiligenstadt	guided	FALSE	FALSE	guided batch	51.3782	10.1374
636102847b0d926ff81766c3	AN16075	BF.8	22B (Omicron)	20221021	99084	Erfurt	guided	FALSE	FALSE	guided batch	50.9781	11.0292
636102847b0d926ff81766c4	AN16114	BF.7.6	22B (Omicron)	20221024	37308	Heilbad Heiligenstadt	guided	FALSE	FALSE	guided batch	51.3782	10.1374
636102847b0d926ff81766c7	AN16148	BA.5.2.1	22B (Omicron)	20221024	37308	Heilbad Heiligenstadt	guided	FALSE	FALSE	guided batch	51.3782	10.1374
636102847b0d926ff81766c5	AN16126	BA.5.2	22B (Omicron)	20221024	37339	Breitenworbis	guided	FALSE	FALSE	guided batch	51.4499	10.3433
636102847b0d926ff81766c9	AN16155	BA.5.1	22B (Omicron)	20221025	37308	Heilbad Heiligenstadt	guided	FALSE	FALSE	guided batch	51.3782	10.1374
636102847b0d926ff81766ca	AN16164	BA.5.2	22B (Omicron)	20221025	36469	Tiefenort	randomized	FALSE	FALSE	guided batch	50.8395	10.166
636102847b0d926ff81766c6	AN16146	BA.5.2	22B (Omicron)	20221025	37308	Heilbad Heiligenstadt	guided	FALSE	FALSE	guided batch	51.3782	10.1374
636102847b0d926ff81766c8	AN16151	BA.5.2	22B (Omicron)	20221025	37355	Niederorschel	guided	FALSE	FALSE	guided batch	51.3722	10.4237
6343f0bd3e34c4da2a7d857d	AN15333	BQ.1.1	22B (Omicron)	20221005	37339	Leinefelde-Worbis	first	first	5th Oct 2022; 1st BQ.1.1 sample	1st BQ.1.1 sample	51.4117	10.3358
6343f0bd3e34c4da2a7d8580	AN15377	BA.5.2.24	22B (Omicron)	20221005	99867	Gotha	randomized	FALSE	FALSE	routine batch	50.9482	10.7019
6343f0bd3e34c4da2a7d8585	AN15421	BA.5.2.1	22B (Omicron)	20221005	99610	Schallenburg	randomized	FALSE	FALSE	routine batch	51.1408	11.0828
6343f0bd3e34c4da2a7d8583	AN15415	BA.5.2	22B (Omicron)	20221005	99628	Buttstaedt	randomized	FALSE	FALSE	routine batch	51.1223	11.4172
6343f0bd3e34c4da2a7d8591	AN15467	BF.7	22B (Omicron)	20221005	98646	Hildburghausen	randomized	FALSE	FALSE	routine batch	50.4255	10.7318
6343f0bd3e34c4da2a7d8584	AN15416	BA.5.1	22B (Omicron)	20221005	99634	Gangloffsoemmern	randomized	FALSE	FALSE	routine batch	51.1894	10.9433
6343f0bd3e34c4da2a7d8582	AN15414	BA.5.1.22	22B (Omicron)	20221005	99638	Kindelbrueck	randomized	FALSE	FALSE	routine batch	51.2617	11.09
6343f0bd3e34c4da2a7d8592	AN15469	BF.7	22B (Omicron)	20221005	98646	Hildburghausen	randomized	FALSE	FALSE	routine batch	50.4255	10.7318
6343f0bd3e34c4da2a7d8587	AN15435	BA.5.2	22B (Omicron)	20221005	98646	Hildburghausen	randomized	FALSE	FALSE	routine batch	50.4255	10.7318
6343f0bd3e34c4da2a7d8588	AN15436	BF.10	22B (Omicron)	20221005	98646	Hildburghausen	randomized	FALSE	FALSE	routine batch	50.4255	10.7318
6343f0bd3e34c4da2a7d8586	AN15429	BA.5.2	22B (Omicron)	20221006	98646	Hildburghausen	randomized	FALSE	FALSE	routine batch	50.4255	10.7318
6343f0bd3e34c4da2a7d8581	AN15398	BA.5.2.1	22D (Omicron)	20221006	99834	Gerstungen	randomized	FALSE	FALSE	routine batch	50.9667	10.0667
6343f0bd3e34c4da2a7d858d	AN15457	BF.10	22B (Omicron)	20221006	98646	Hildburghausen	randomized	FALSE	FALSE	routine batch	50.4255	10.7318
6343f0bd3e34c4da2a7d8589	AN15441	BA.5.2	22B (Omicron)	20221006	37351	Dingelstaedt	randomized	FALSE	FALSE	routine batch	51.3153	10.3174
6343f0bd3e34c4da2a7d8590	AN15462	BA.5.2.1	22B (Omicron)	20221006	99625	Koelleda	randomized	FALSE	FALSE	routine batch	51.1875	11.2449
6343f0bd3e34c4da2a7d858e	AN15459	BA.5.2.1	22B (Omicron)	20221006	99610	Soemmerda	randomized	FALSE	FALSE	routine batch	51.1591	11.1152
634e7ebd629ea805be27e38e	AN15471	BA.5.1	22B (Omicron)	20221007	99867	Gotha	randomized	FALSE	FALSE	routine batch	50.9482	10.7019
634e7ebd629ea805be27e391	AN15483			20221007	99867	Gotha	randomized	FALSE	FALSE	routine batch	50.9482	10.7019
6343f0bd3e34c4da2a7d858c	AN15455	BA.5.2	22B (Omicron)	20221007	37339	Breitenworbis	randomized	FALSE	FALSE	routine batch	51.4499	10.3433
634e7ebd629ea805be27e390	AN15474	BA.5.2	22B (Omicron)	20221007	99994	Nottertal Heilinger Hoehen	randomized	FALSE	FALSE	routine batch	51.2375	10.6556
634e7ebd629ea805be27e394	AN15538	BA.5.2	22B (Omicron)	20221007	98646	Hildburghausen	randomized	FALSE	FALSE	routine batch	50.4255	10.7318
6343f0bd3e34c4da2a7d858a	AN15451	BA.5.2.6	22B (Omicron)	20221007	37327	Leinefelde-Worbis	randomized	FALSE	FALSE	routine batch	51.4117	10.3358
6343f0bd3e34c4da2a7d858b	AN15452	BA.5.2	22B (Omicron)	20221007	37339	Breitenworbis	randomized	FALSE	FALSE	routine batch	51.4499	10.3433
634e7ebd629ea805be27e38f	AN15473	BA.5.2.18	22B (Omicron)	20221007	99955	Kutzleben	randomized	FALSE	FALSE	routine batch	51.2	10.75
634e7ebd629ea805be27e395	AN15558	BF.7	22B (Omicron)	20221008	99869	Sonneborn	randomized	FALSE	FALSE	routine batch	50.9927	10.5917
634e7ebd629ea805be27e392	AN15512	BA.5.1.3	22B (Omicron)	20221010	36433	Bad Salzungen	randomized	FALSE	FALSE	routine batch	50.8134	10.2361
634e7ebd629ea805be27e39c	AN15583	BA.5.2	22B (Omicron)	20221010	98646	Hildburghausen	randomized	FALSE	FALSE	routine batch	50.4255	10.7318
634e7ebd629ea805be27e39d	AN15594	BE.1.1.2	22B (Omicron)	20221010	99610	Soemmerda	randomized	FALSE	FALSE	routine batch	51.1591	11.1152
634e7ebd629ea805be27e393	AN15526	BA.5.2	22B (Omicron)	20221010	37339	Breitenworbis	randomized	FALSE	FALSE	routine batch	51.4499	10.3433
634e7ebd629ea805be27e39e	AN15606	BA.5.2	22B (Omicron)	20221011	99638	Kindelbrueck	randomized	FALSE	FALSE	routine batch	51.2617	11.09
634e7ebd629ea805be27e3a0	AN15672	BA.5.2.1	22B (Omicron)	20221011	98646	Hildburghausen	randomized	FALSE	FALSE	routine batch	50.4255	10.7318
634e7ebd629ea805be27e396	AN15572	BA.5.2	22B (Omicron)	20221011	36404	Vacha	randomized	FALSE	FALSE	routine batch	50.8279	10.0218
634e7ebd629ea805be27e39b	AN15577	BA.5.2	22B (Omicron)	20221011	99820	Hoerselberg-Hainich	randomized	FALSE	FALSE	routine batch	50.9906	10.4331
634e7ebd629ea805be27e39f	AN15650	BA.5.9	22B (Omicron)	20221011	98617	Meiningen	randomized	FALSE	FALSE	routine batch	50.5679	10.4152
634e7ebd629ea805be27e39a	AN15576	BA.5.2	22B (Omicron)	20221011	37339	Breitenworbis	randomized	FALSE	FALSE	routine batch	51.4499	10.3433
634e7ebd629ea805be27e397	AN15573	BA.5.2	22B (Omicron)	20221011	36433	Bad Salzungen	randomized	FALSE	FALSE	routine batch	50.8134	10.2361
634e7ebd629ea805be27e398	AN15574	BA.5.2	22B (Omicron)	20221011	98597	Breitungen	randomized	FALSE	FALSE	routine batch	50.7636	10.3272
634e7ebd629ea805be27e399	AN15575	BA.5.1.3	22B (Omicron)	20221011	36433	Bad Salzungen	randomized	FALSE	FALSE	routine batch	50.8134	10.2361
63578eb792c2a34f4c30fe4e	AN15702			20221012	36433	Bad Salzungen	randomized	FALSE	FALSE	routine batch	50.8134	10.2361
634e7ebd629ea805be27e3a3	AN15688	BA.5.1	22B (Omicron)	20221012	99885	Woelfis	randomized	FALSE	FALSE	routine batch	50.8083	10.7791
634e7ebd629ea805be27e3a1	AN15683	BA.5.2	22B (Omicron)	20221012	99867	Gotha	randomized	FALSE	FALSE	routine batch	50.9482	10.7019
63578eb792c2a34f4c30fe53	AN15735	BF.10	22B (Omicron)	20221012	98646	Hildburghausen	randomized	FALSE	FALSE	routine batch	50.4255	10.7318
634e7ebd629ea805be27e3a2	AN15686	BA.5.2	22B (Omicron)	20221012	99867	Gotha	randomized	FALSE	FALSE	routine batch	50.9482	10.7019
634e7ebd629ea805be27e3a4	AN15690	BA.5.2	22B (Omicron)	20221012	99974	Muehlhausen	randomized	FALSE	FALSE	routine batch	51.209	10.4528
63578eb792c2a34f4c30fe50	AN15723	BF.7	22B (Omicron)	20221012	99625	Koelleda	randomized	FALSE	FALSE	routine batch	51.1875	11.2449
63578eb792c2a34f4c30fe4f	AN15715	BA.5.9	22B (Omicron)	20221013	98617	Meiningen	randomized	FALSE	FALSE	routine batch	50.5679	10.4152
63578eb792c2a34f4c30fe51	AN15724	BA.5.1.3	22B (Omicron)	20221013	6577	Gorsleben	randomized	FALSE	FALSE	routine batch	51.2753	11.1844
63578eb792c2a34f4c30fe52	AN15729	BF.14	22B (Omicron)	20221013	99958	Graefentonna	randomized	FALSE	FALSE	routine batch	51.0911	10.7317
63578eb792c2a34f4c30fe56	AN15801	BF.7	22B (Omicron)	20221013	99869	Drei Gleichen	randomized	FALSE	FALSE	routine batch	50.8667	10.8167
63578eb792c2a34f4c30fe54	AN15767	BA.5.9	22B (Omicron)	20221014	98617	Meiningen	randomized	FALSE	FALSE	routine batch	50.5679	10.4152
63578eb792c2a34f4c30fe55	AN15783	BA.5.1.2	22B (Omicron)	20221014	7381	Poeßneck	randomized	FALSE	FALSE	routine batch	50.6936	11.5923
63578eb792c2a34f4c30fe5b	AN15843	BF.7	22B (Omicron)	20221016	99625	Koelleda	randomized	FALSE	FALSE	routine batch	51.1875	11.2449
63578eb792c2a34f4c30fe5c	AN15846	BF.7	22B (Omicron)	20221016	99510	Apolda	randomized	FALSE	FALSE	routine batch	51.0262	11.5164
63578eb792c2a34f4c30fe59	AN15831	BA.5.2.20	22B (Omicron)	20221016	98663	Heldburg	randomized	FALSE	FALSE	routine batch	50.275	10.7667
63578eb792c2a34f4c30fe5e	AN15924	BF.5	22B (Omicron)	20221017	99610	Soemmerda	randomized	FALSE	FALSE	routine batch	51.1591	11.1152
63578eb792c2a34f4c30fe58	AN15830	BF.8	22B (Omicron)	20221017	99084	Erfurt	randomized	FALSE	FALSE	routine batch	50.9781	11.0292
63578eb792c2a34f4c30fe5a	AN15833	BA.5.1.2	22B (Omicron)	20221017	7381	Poeßneck	randomized	FALSE	FALSE	routine batch	50.6936	11.5923
63578eb792c2a34f4c30fe57	AN15824	BA.5.1	22B (Omicron)	20221017	36433	Bad Salzungen	randomized	FALSE	FALSE	routine batch	50.8134	10.2361
63578eb792c2a34f4c30fe5f	AN15963	BA.5.2	22B (Omicron)	20221018	37355	Niederorschel	randomized	FALSE	FALSE	routine batch	51.3722	10.4237
63578eb792c2a34f4c30fe60	AN15996	BA.5.2	22B (Omicron)	20221018	99610	Soemmerda	randomized	FALSE	FALSE	routine batch	51.1591	11.1152
63578eb792c2a34f4c30fe62	AN15999	BF.7	22B (Omicron)	20221018	99610	Soemmerda	randomized	FALSE	FALSE	routine batch	51.1591	11.1152
63578eb792c2a34f4c30fe5d	AN15878	BA.5.2.1	22B (Omicron)	20221018	37339	Breitenworbis	randomized	FALSE	FALSE	routine batch	51.4499	10.3433
63578eb792c2a34f4c30fe63	AN16002	BF.10	22B (Omicron)	20221018	98646	Hildburghausen	randomized	FALSE	FALSE	routine batch	50.4255	10.7318
63578eb792c2a34f4c30fe61	AN15997	BA.4.6	22A (Omicron)	20221018	99610	Leubingen	randomized	FALSE	FALSE	routine batch	51.2011	11.1522
63578eb792c2a34f4c30fe64	AN16003	Unassigned	22B (Omicron)	20221019	7381	Poeßneck	randomized	FALSE	FALSE	routine batch	50.6936	11.5923
637b541fc8d5709350201045	AN16176	BA.5.9	22B (Omicron)	20221024	99636	Rothenberga	randomized	FALSE	FALSE	routine batch	51.2003	11.4242
637b541fc8d5709350201046	AN16177	BF.7	22B (Omicron)	20221024	99638	Buechel	randomized	FALSE	FALSE	routine batch	51.25	11.15
637b541fc8d5709350201047	AN16181	BF.7	22B (Omicron)	20221024	99198	Udestedt	randomized	FALSE	FALSE	routine batch	51.05	11.1333
637b541fc8d5709350201049	AN16184	BA.5.2	22B (Omicron)	20221024	99610	Soemmerda	randomized	FALSE	FALSE	routine batch	51.1591	11.1152
636a1485bd3fb385be1a88de	AN16199	XAZ	recombinant	20221024	99628	Buttstaedt	randomized	FALSE	FALSE	routine batch	51.1223	11.4172
636a1485bd3fb385be1a88dd	AN16185	BF.7	22B (Omicron)	20221024	99610	Soemmerda	randomized	FALSE	FALSE	routine batch	51.1591	11.1152
637b541fc8d5709350201048	AN16183	BA.5.2.7	22B (Omicron)	20221024	99195	Schloßvippach	randomized	FALSE	FALSE	routine batch	51.105	11.1451
636a1485bd3fb385be1a88e4	AN16242	BA.5.1.3	22B (Omicron)	20221025	99994	Nottertal Heilinger Hoehen	randomized	FALSE	FALSE	routine batch	51.2375	10.6556
637b541fc8d5709350201044	AN16167	BF.7	22B (Omicron)	20221025	36433	Leimbach	randomized	FALSE	FALSE	routine batch	50.8167	10.2
636a1485bd3fb385be1a88db	AN16165	BA.5.2	22B (Omicron)	20221025	36469	Tiefenort	randomized	FALSE	FALSE	routine batch	50.8395	10.166
636a1485bd3fb385be1a88e1	AN16216	BA.5.2.1	22B (Omicron)	20221025	98617	Untermaßfeld	randomized	FALSE	FALSE	routine batch	50.5441	10.3665
636a1485bd3fb385be1a88e0	AN16213	BA.5.1.10	22B (Omicron)	20221025	99869	Schwabhausen	randomized	FALSE	FALSE	routine batch	50.8885	10.7311
636a1485bd3fb385be1a88e2	AN16219	BA.5.1	22B (Omicron)	20221025	98617	Untermaßfeld	randomized	FALSE	FALSE	routine batch	50.5441	10.3665
636a1485bd3fb385be1a88dc	AN16166	BA.5.2	22B (Omicron)	20221025	36433	Bad Salzungen	randomized	FALSE	FALSE	routine batch	50.8134	10.2361
636a1485bd3fb385be1a88e3	AN16232	BA.5.2	22B (Omicron)	20221026	37355	Niederorschel	randomized	FALSE	FALSE	routine batch	51.3722	10.4237
636a1485bd3fb385be1a88e5	AN16244	BF.5	22B (Omicron)	20221027	37308	Heilbad Heiligenstadt	randomized	FALSE	FALSE	routine batch	51.3782	10.1374
636a1485bd3fb385be1a88e6	AN16245	BF.5	22B (Omicron)	20221027	37308	Heilbad Heiligenstadt	randomized	FALSE	FALSE	routine batch	51.3782	10.1374
636a1485bd3fb385be1a88e8	AN16289	BF.7	22B (Omicron)	20221027	36433	Bad Salzungen	randomized	FALSE	FALSE	routine batch	50.8134	10.2361
636a1485bd3fb385be1a88e9	AN16296	BF.7	22B (Omicron)	20221027	99195	Eckstedt	randomized	FALSE	FALSE	routine batch	51.0711	11.1461
636a1485bd3fb385be1a88e7	AN16274	BA.5.2	22B (Omicron)	20221028	37355	Niederorschel	randomized	FALSE	FALSE	routine batch	51.3722	10.4237
636a1485bd3fb385be1a88eb	AN16303	BF.7	22B (Omicron)	20221028	7958	Hohenleuben	randomized	FALSE	FALSE	routine batch	50.7113	12.0543
636a1485bd3fb385be1a88ea	AN16302	BF.7	22B (Omicron)	20221028	7958	Hohenleuben	randomized	FALSE	FALSE	routine batch	50.7113	12.0543
637354118512ce29ec6c718b	AN16387	BQ.1.1	22E (Omicron)	20221101	99625	Beichlingen	randomized	TRUE	1st Nov 2022	routine batch	51.2326	11.2578
636a1485bd3fb385be1a88ed	AN16342	BA.5.1.22	22B (Omicron)	20221101	6567	Bad Frankenhausen	randomized	FALSE	FALSE	routine batch	51.3561	11.0998
636a1485bd3fb385be1a88ee	AN16358	BA.5.2.20	22B (Omicron)	20221101	99947	Bad Langensalza	randomized	FALSE	FALSE	routine batch	51.1077	10.646
637354118512ce29ec6c7189	AN16383	BA.5.2.6	22B (Omicron)	20221101	99631	Weißensee	randomized	FALSE	FALSE	routine batch	51.1999	11.0691
636a1485bd3fb385be1a88ec	AN16339	BA.5.1	22B (Omicron)	20221101	37308	Heilbad Heiligenstadt	randomized	FALSE	FALSE	routine batch	51.3782	10.1374
636a1485bd3fb385be1a88ef	AN16359	BA.5.2.7	22B (Omicron)	20221101	99867	Gotha	randomized	FALSE	FALSE	routine batch	50.9482	10.7019
637354118512ce29ec6c718a	AN16386	BF.7	22B (Omicron)	20221101	99638	Kindelbrueck	randomized	FALSE	FALSE	routine batch	51.2617	11.09
637354118512ce29ec6c718c	AN16388	BQ.1.1	22E (Omicron)	20221101	99610	Soemmerda	randomized	TRUE	1st Nov 2022	routine batch	51.1591	11.1152
637354118512ce29ec6c7190	AN16405	BA.5.9	22B (Omicron)	20221102	99869	Drei Gleichen	randomized	FALSE	FALSE	routine batch	50.8667	10.8167
637354118512ce29ec6c7191	AN16406	BA.5.9	22B (Omicron)	20221102	6571	Gehofen	randomized	FALSE	FALSE	routine batch	51.3227	11.32
636a1485bd3fb385be1a88f1	AN16382	BA.5.2	22B (Omicron)	20221102	99625	Koelleda	randomized	FALSE	FALSE	routine batch	51.1875	11.2449
637354118512ce29ec6c718d	AN16391	BA.5.2	22B (Omicron)	20221102	99610	Soemmerda	randomized	FALSE	FALSE	routine batch	51.1591	11.1152
637354118512ce29ec6c7193	AN16414	BF.7.5	22B (Omicron)	20221102	99867	Gotha	randomized	FALSE	FALSE	routine batch	50.9482	10.7019
636a1485bd3fb385be1a88f0	AN16375	BA.5.1	22B (Omicron)	20221102	36433	Bad Salzungen	randomized	FALSE	FALSE	routine batch	50.8134	10.2361
637354118512ce29ec6c718f	AN16402	BA.5.5	22B (Omicron)	20221102	99869	Drei Gleichen	randomized	FALSE	FALSE	routine batch	50.8667	10.8167
637354118512ce29ec6c7192	AN16411	BF.7.1	22B (Omicron)	20221102	99610	Soemmerda	randomized	FALSE	FALSE	routine batch	51.1591	11.1152
637354118512ce29ec6c7194	AN16431	BA.5.1.24	22B (Omicron)	20221103	99628	Buttstaedt	randomized	FALSE	FALSE	routine batch	51.1223	11.4172
637354118512ce29ec6c718e	AN16394	BA.5.2	22B (Omicron)	20221103	37355	Niederorschel	randomized	FALSE	FALSE	routine batch	51.3722	10.4237
637354118512ce29ec6c7196	AN16459	BA.5.1.5	22B (Omicron)	20221105	99867	Gotha	randomized	FALSE	FALSE	routine batch	50.9482	10.7019
637354118512ce29ec6c7197	AN16467	BF.7	22B (Omicron)	20221107	36433	Bad Salzungen	randomized	FALSE	FALSE	routine batch	50.8134	10.2361
637354118512ce29ec6c7195	AN16458	BF.7.5	22B (Omicron)	20221107	99867	Gotha	randomized	FALSE	FALSE	routine batch	50.9482	10.7019
637354118512ce29ec6c7198	AN16468	BF.7	22B (Omicron)	20221107	36433	Bad Salzungen	randomized	FALSE	FALSE	routine batch	50.8134	10.2361
637354118512ce29ec6c719b	AN16475	BF.7	22B (Omicron)	20221107	99638	Kindelbrueck	randomized	FALSE	FALSE	routine batch	51.2617	11.09
637354118512ce29ec6c719c	AN16492	BF.7.5	22B (Omicron)	20221107	99869	Drei Gleichen	randomized	FALSE	FALSE	routine batch	50.8667	10.8167
637354118512ce29ec6c7199	AN16472	BF.31	22B (Omicron)	20221107	99718	Trebra	randomized	FALSE	FALSE	routine batch	51.2833	10.9833
637354118512ce29ec6c719a	AN16474	BA.5.2	22B (Omicron)	20221107	99610	Soemmerda	randomized	FALSE	FALSE	routine batch	51.1591	11.1152
637354118512ce29ec6c719e	AN16510	BA.5.2.1	22B (Omicron)	20221108	99195	Grossrudestedt	randomized	FALSE	FALSE	routine batch	51.093	11.0998
637354118512ce29ec6c719d	AN16509	BF.7.3	22B (Omicron)	20221108	99195	Markvippach	randomized	FALSE	FALSE	routine batch	51.0789	11.175
637354118512ce29ec6c719f	AN16596	BN.1.3	22D (Omicron)	20221110	99610	Wundersleben	randomized	FALSE	FALSE	routine batch	51.1544	11.0389
638df5ba98c3bae66af1e42b	AN16778	BF.7	22B (Omicron)	20221110	36448	Bad Liebenstein	randomized	FALSE	FALSE	routine batch	50.8157	10.3512
637b541fc8d570935020104a	AN16601	BA.4.6.1	22A (Omicron)	20221111	99996	Menteroda	randomized	FALSE	FALSE	routine batch	51.3076	10.5632
637b541fc8d570935020104f	AN16627	BA.5.2.1	22B (Omicron)	20221114	99625	Koelleda	randomized	FALSE	FALSE	routine batch	51.1875	11.2449
637b541fc8d5709350201050	AN16628	BF.7	22B (Omicron)	20221114	99610	Soemmerda	randomized	FALSE	FALSE	routine batch	51.1591	11.1152
637b541fc8d570935020104d	AN16625	BA.5.2.1	22B (Omicron)	20221114	99625	Koelleda	randomized	FALSE	FALSE	routine batch	51.1875	11.2449
637b541fc8d570935020104e	AN16626	BF.7	22B (Omicron)	20221114	99610	Soemmerda	randomized	FALSE	FALSE	routine batch	51.1591	11.1152
637b541fc8d5709350201052	AN16643	BF.7	22B (Omicron)	20221115	99610	Vogelsberg	randomized	FALSE	FALSE	routine batch	51.1333	11.25
637b541fc8d5709350201055	AN16647	Unassigned	nan	20221115	99195	Markvippach	randomized	FALSE	FALSE	routine batch	51.0789	11.175
637b541fc8d570935020104c	AN16620	BQ.1.1	22E (Omicron)	20221115	7381	Poeßneck	randomized	TRUE	15th Nov 2022	routine batch	50.6936	11.5923
637b541fc8d570935020104b	AN16615	BA.5.2.13	22B (Omicron)	20221115	37308	Heilbad Heiligenstadt	randomized	FALSE	FALSE	routine batch	51.3782	10.1374
637b541fc8d5709350201053	AN16644	Unassigned	recombinant	20221115	99636	Ostramondra	randomized	FALSE	FALSE	routine batch	51.2	11.3333
637b541fc8d5709350201056	AN16648	BF.7.5	22B (Omicron)	20221115	99610	Soemmerda	randomized	FALSE	FALSE	routine batch	51.1591	11.1152
637b541fc8d5709350201051	AN16642	BF.7.5	22B (Omicron)	20221116	99610	Soemmerda	randomized	FALSE	FALSE	routine batch	51.1591	11.1152
637b541fc8d5709350201057	AN16649	BA.5.2.1	22B (Omicron)	20221116	99867	Gotha	randomized	FALSE	FALSE	routine batch	50.9482	10.7019
637b541fc8d5709350201054	AN16645	BF.7	22B (Omicron)	20221116	99638	Kindelbrueck	randomized	FALSE	FALSE	routine batch	51.2617	11.09
637b541fc8d5709350201059	AN16677	BF.7	22B (Omicron)	20221117	99625	Koelleda	randomized	FALSE	FALSE	routine batch	51.1875	11.2449
637b541fc8d5709350201058	AN16676	BF.7	22B (Omicron)	20221117	99638	Kindelbrueck	randomized	FALSE	FALSE	routine batch	51.2617	11.09
637b541fc8d570935020105a	AN16678	BF.7	22B (Omicron)	20221117	99625	Koelleda	randomized	FALSE	FALSE	routine batch	51.1875	11.2449
638df5ba98c3bae66af1e424	AN16742	BF.7.6	22B (Omicron)	20221123	37308	Geismar	randomized	FALSE	FALSE	routine batch	51.2317	10.1655
638df5ba98c3bae66af1e429	AN16771	BN.1.2	22D (Omicron)	20221124	99867	Gotha	randomized	FALSE	FALSE	routine batch	50.9482	10.7019
638df5ba98c3bae66af1e427	AN16768	BA.5.2	22B (Omicron)	20221124	99636	Rastenberg	randomized	FALSE	FALSE	routine batch	51.175	11.4203
638df5ba98c3bae66af1e428	AN16769	BA.5.2	22B (Omicron)	20221124	7937	Zeulenroda	randomized	FALSE	FALSE	routine batch	50.6528	11.9838
638df5ba98c3bae66af1e425	AN16750	BF.7.10	22B (Omicron)	20221124	36404	Vacha	randomized	FALSE	FALSE	routine batch	50.8279	10.0218
638df5ba98c3bae66af1e426	AN16754	BF.7	22B (Omicron)	20221124	98646	Hildburghausen	randomized	FALSE	FALSE	routine batch	50.4255	10.7318
