# Supplementary material for: Leveraging mobility data to analyze persistent SARS-CoV-2 mutations and inform targeted genomic surveillance
Source: eLife. 2025 Jan 15;13:RP94045. doi: 10.7554/eLife.94045 (PMC11735024; doi:10.7554/eLife.94045)
Supplement: Figure 3—source data 2. — For each community, the incoming one-way trips from the community of BQ.1.1 origin in Thuringia based on the October 2020 and June 2021 datasets, the number of guided and randomized samples per community, and an indication of found BQ.1.1 samples are provided. [file elife-94045-fig3-data2.xlsx]

## Sheet: Figure 3-source data 2
Community	AGS	Federal_State	Trips_Oct20	Trips_Jun21	Random_Sampling_Oct22	Random_Sampling_Nov22	Guided_Sampling	Hit_By	Hit_Date	latitude	longitude
Leinefelde-Worbis; Stadt	16061115	Thuringia	488430	542061	2	0	0	first	5th Oct 2022; 1st BQ.1.1 sample	51.4117	10.3358
Kleinbartloff	16061059	Thuringia	52118	54798	0	0	0	FALSE	FALSE	51.3509	10.3835
Deuna	16061022	Thuringia	35100	40052	0	0	0	FALSE	FALSE	51.35	10.4667
Heilbad Heiligenstadt; Stadt	16061045	Thuringia	34005	37499	3	2	14	guided	17th Oct 2022	51.3782	10.1374
Duderstadt	3152007	Lower Saxony	32658	34972	0	0	0	FALSE	FALSE	51.5123	10.2575
Breitenworbis	16061017	Thuringia	26357	29331	6	0	1	FALSE	FALSE	51.4499	10.3433
Niederorschel	16061074	Thuringia	20314	21902	4	2	1	FALSE	FALSE	51.3722	10.4237
Sonnenstein	16061117	Thuringia	19350	19621	0	0	0	FALSE	FALSE	51.5333	10.4167
Teistungen	16061114	Thuringia	16894	19172	0	0	0	FALSE	FALSE	51.4697	10.2658
Dingelstädt	16061025	Thuringia	16365	17451	1	0	0	FALSE	FALSE	51.3153	10.3174
Am Ohmberg	16061116	Thuringia	14858	13600	0	0	0	FALSE	FALSE	51.4833	10.4667
Mühlhausen/Thüringen; Stadt	16064046	Thuringia	13911	15531	3	0	0	FALSE	FALSE	51.209	10.4528
Weende	3152012	Lower Saxony	13752	0	0	0	0	FALSE	FALSE	51.5581	9.93318
Bodenrode-Westhausen	16061012	Thuringia	13622	8607	0	0	0	FALSE	FALSE	51.3944	10.2008
Wingerode	16061107	Thuringia	10741	12388	0	0	0	FALSE	FALSE	51.3906	10.2408
Haynrode	16061044	Thuringia	9960	12806	0	0	0	FALSE	FALSE	51.4453	10.4442
Nordhausen; Stadt	16062041	Thuringia	9912	11050	0	0	0	FALSE	FALSE	51.5003	10.7914
Kallmerode	16061054	Thuringia	8394	8449	0	0	0	FALSE	FALSE	51.3506	10.3064
Hundeshagen	16061052	Thuringia	8142	10925	0	0	0	FALSE	FALSE	51.4346	10.2791
Gernrode	16061037	Thuringia	7688	8001	0	0	0	FALSE	FALSE	51.3947	10.4
Kirchworbis	16061058	Thuringia	7642	8684	0	0	0	FALSE	FALSE	51.4108	10.3972
Dünwald	16064014	Thuringia	6491	6790	0	0	0	FALSE	FALSE	51.3167	10.4333
Küllstedt	16061063	Thuringia	5783	6341	0	0	1	FALSE	FALSE	51.2758	10.2804
Silberhausen	16061087	Thuringia	5230	5278	0	0	0	FALSE	FALSE	51.3094	10.3392
Anrode	16064073	Thuringia	4961	5292	0	0	0	FALSE	FALSE	51.2597	10.3081
Herzberg am Harz	3156009	Lower Saxony	4803	5224	0	0	0	FALSE	FALSE	51.6575	10.3411
Erfurt; Stadt	16051000	Thuringia	4782	6004	1	0	2	FALSE	FALSE	50.9781	11.0292
Ecklingerode	16061026	Thuringia	4414	4900	0	0	0	FALSE	FALSE	51.5033	10.3117
Werther/Thüringen	16062002	Thuringia	4143	0	0	0	0	FALSE	FALSE	51.4738	10.7417
Helmsdorf	16061046	Thuringia	4023	4267	0	0	0	FALSE	FALSE	51.2967	10.3511
Schimberg	16061113	Thuringia	3790	4183	0	0	0	FALSE	FALSE	51.2683	10.1589
Hausen	16061043	Thuringia	3583	3228	0	0	0	FALSE	FALSE	51.3797	10.3786
Kreuzebra	16061061	Thuringia	3342	3219	0	0	0	FALSE	FALSE	51.3419	10.2575
Wehnde	16061103	Thuringia	3289	3529	0	0	0	FALSE	FALSE	51.4814	10.3131
Geisleden	16061034	Thuringia	3221	3667	0	0	0	FALSE	FALSE	51.3508	10.1958
Niedernjesa	3152009	Lower Saxony	3208	0	0	0	0	FALSE	FALSE	51.4762	9.9262
Tastungen	16061094	Thuringia	3102	3920	0	0	0	FALSE	FALSE	51.4678	10.3097
Brehme	16061015	Thuringia	3083	3485	0	0	0	FALSE	FALSE	51.4936	10.3558
Harz (Landkreis Osterode), gemfr. Geb.	3156501	Lower Saxony	2989	3173	0	0	0	FALSE	FALSE	51.68	10.37
Ferna	16061031	Thuringia	2749	3449	0	0	0	FALSE	FALSE	51.4569	10.3072
Kassel; documenta-Stadt	6611000	Hessen	2733	2517	0	0	0	FALSE	FALSE	51.3167	9.5
Berlingerode	16061003	Thuringia	2657	3021	0	0	0	FALSE	FALSE	51.4578	10.2406
Sollstedt	16062049	Thuringia	2510	3124	0	0	0	FALSE	FALSE	51.4156	10.5339
Südeichsfeld	16064074	Thuringia	2288	2126	0	0	0	FALSE	FALSE	51.1639	10.3194
Unstruttal	16064071	Thuringia	2164	2519	0	0	0	FALSE	FALSE	51.2333	10.45
Gleichen	3152011	Lower Saxony	2116	2245	0	0	0	FALSE	FALSE	51.4619	10.0389
Sondershausen; Stadt	16065067	Thuringia	2055	2671	1	0	0	FALSE	FALSE	51.3697	10.8701
Rodeberg	16064055	Thuringia	1880	1634	0	0	0	FALSE	FALSE	51.2111	10.3198
Kefferhausen	16061055	Thuringia	1773	2430	0	0	0	FALSE	FALSE	51.3128	10.285
Werther	16062063	Thuringia	1728	2351	0	0	0	FALSE	FALSE	51.4738	10.7417
Uder	16061097	Thuringia	1723	3306	0	0	0	FALSE	FALSE	51.3625	10.0714
Hohes Kreuz	16061049	Thuringia	1682	1944	0	0	0	FALSE	FALSE	51.4241	10.1206
Heuthen	16061047	Thuringia	1597	1773	0	0	0	FALSE	FALSE	51.3319	10.2231
Wachstedt	16061101	Thuringia	1588	1969	0	0	0	FALSE	FALSE	51.2931	10.2478
Bad Lauterberg im Harz	3156002	Lower Saxony	1461	1389	0	0	0	FALSE	FALSE	51.6306	10.4686
Lipprechterode	16062033	Thuringia	1395	420	0	0	0	FALSE	FALSE	51.4592	10.5567
Arenshausen	16061001	Thuringia	1349	1624	0	0	0	FALSE	FALSE	51.3767	9.97167
Hohenstein	16062062	Thuringia	1253	1220	0	0	0	FALSE	FALSE	51.5433	10.5444
Rosdorf, Kreis Göttingen	3152021	Lower Saxony	1239	1654	0	0	0	FALSE	FALSE	51.5036	9.89972
Leipzig; Stadt	14713000	Saxony	1112	1135	0	0	0	FALSE	FALSE	51.3403	12.3748
Witzenhausen; Stadt	6636016	Hessen	1101	930	0	0	0	FALSE	FALSE	51.3416	9.85684
Heringen/Helme; Stadt	16062064	Thuringia	1051	1400	0	0	0	FALSE	FALSE	51.4472	10.8808
Bad Sachsa	3156003	Lower Saxony	1013	912	0	0	0	FALSE	FALSE	51.5969	10.5522
Großbartloff	16061041	Thuringia	872	1132	0	0	0	FALSE	FALSE	51.2503	10.2114
Northeim; Stadt	3155011	Lower Saxony	856	1267	0	0	0	FALSE	FALSE	51.706	10.0002
Hann. Münden	3152016	Lower Saxony	836	1122	0	0	0	FALSE	FALSE	51.4167	9.65
Weinbergen	16064066	Thuringia	823	1661	0	0	0	FALSE	FALSE	51.2004	10.5321
Vogtei	16064075	Thuringia	801	872	0	0	0	FALSE	FALSE	51.1606	10.4425
Helbedündorf	16065032	Thuringia	801	1053	0	0	0	FALSE	FALSE	51.3375	10.6042
Eschwege; Kreisstadt	6636003	Hessen	671	1048	0	0	0	FALSE	FALSE	51.1881	10.0528
Bad Langensalza; Stadt	16064003	Thuringia	668	1304	0	1	0	FALSE	FALSE	51.1077	10.646
Buhla	16061019	Thuringia	644	747	0	0	0	FALSE	FALSE	51.44	10.49
Bovenden	3152004	Lower Saxony	599	1023	0	0	0	FALSE	FALSE	51.5897	9.92222
Steinbach	16061089	Thuringia	589	887	0	0	0	FALSE	FALSE	51.4174	10.2174
Osterode am Harz	3156011	Lower Saxony	575	781	0	0	0	FALSE	FALSE	51.7286	10.2522
Gotha; Stadt	16067029	Thuringia	561	799	10	7	0	FALSE	FALSE	50.9482	10.7019
Büttstedt	16061018	Thuringia	532	688	0	0	0	FALSE	FALSE	51.2603	10.3067
Harztor	16062065	Thuringia	503	503	0	0	0	FALSE	FALSE	51.5667	10.7667
Lohfelden	6633017	Hessen	475	483	0	0	0	FALSE	FALSE	51.2767	9.54278
Lenterode	16061065	Thuringia	399	354	0	0	0	FALSE	FALSE	51.3411	10.0678
Reinholterode	16061076	Thuringia	375	745	0	0	0	FALSE	FALSE	51.4244	10.1942
Ellrich; Stadt	16062005	Thuringia	350	588	0	0	0	FALSE	FALSE	51.5856	10.6681
Rustenfelde	16061082	Thuringia	299	164	0	0	0	FALSE	FALSE	51.3931	10.0042
Hannover; Landeshauptstadt	3241001	Lower Saxony	288	155	0	0	0	FALSE	FALSE	52.3744	9.73861
Menteroda	16064072	Thuringia	204	226	0	1	0	FALSE	FALSE	51.3076	10.5632
Halle (Saale); Stadt	15002000	Saxony-Anhalt	195	348	0	0	0	FALSE	FALSE	51.4828	11.97
Eisenach	16056000	Thuringia	171	370	0	0	0	FALSE	FALSE	50.9832	10.3159
Wipperdorf	16062058	Thuringia	166	365	0	0	0	FALSE	FALSE	51.4558	10.64
Oberharz am Brocken; Stadt	15085228	Saxony-Anhalt	142	0	0	0	0	FALSE	FALSE	51.7167	10.8167
Berlin; Stadt	11000000	Berlin	139	317	0	0	0	FALSE	FALSE	52.5186	13.4083
Bad Sooden-Allendorf; Stadt	6636001	Hessen	136	146	0	0	0	FALSE	FALSE	51.2675	9.96639
Seeburg, Niedersachs	3152024	Lower Saxony	113	268	0	0	0	FALSE	FALSE	51.565	10.1494
Südharz	15087412	Saxony-Anhalt	108	288	0	0	0	FALSE	FALSE	51.4833	11.0667
Harz (Landkreis Goslar), gemfr. Geb.	3153504	Lower Saxony	100	126	0	0	0	FALSE	FALSE	51.7916	10.4198
Gieboldehausen	3152010	Lower Saxony	82	437	0	0	0	FALSE	FALSE	51.6108	10.2147
Hamburg; Freie und Hansestadt	2000000	Hamburg	72	170	0	0	0	FALSE	FALSE	53.5506	9.99333
Ebergötzen	3152008	Lower Saxony	71	94	0	0	0	FALSE	FALSE	51.5708	10.1047
Katlenburg-Lindau	3155007	Lower Saxony	69	102	0	0	0	FALSE	FALSE	51.6681	10.1078
Wüstheuterode	16061111	Thuringia	68	60	0	0	0	FALSE	FALSE	51.3206	10.0606
Körner	16064037	Thuringia	63	75	0	0	0	FALSE	FALSE	51.2311	10.5875
Baunatal; Stadt	6633003	Hessen	36	0	0	0	0	FALSE	FALSE	51.2534	9.4123
Niedergebra	16062037	Thuringia	35	38	0	0	0	FALSE	FALSE	51.4167	10.5997
Schwarzenbek; Stadt	1053116	Schleswig-Holstein	33	0	0	0	0	FALSE	FALSE	53.5042	10.4792
Staufenberg, Niedersachs	3152026	Lower Saxony	33	43	0	0	0	FALSE	FALSE	51.3536	9.62083
Nörten-Hardenberg; Flecken	3155010	Lower Saxony	33	193	0	0	0	FALSE	FALSE	51.6167	9.93333
Rüdershausen	3152022	Lower Saxony	32	0	0	0	0	FALSE	FALSE	51.5831	10.2667
Bebra; Stadt	6632003	Hessen	32	0	0	0	0	FALSE	FALSE	50.9711	9.79028
Einbeck; Stadt	3155013	Lower Saxony	31	0	0	0	0	FALSE	FALSE	51.8167	9.86667
Wanfried; Stadt	6636013	Hessen	31	0	0	0	0	FALSE	FALSE	51.1833	10.1667
Jena; Stadt	16053000	Thuringia	31	200	0	0	0	FALSE	FALSE	50.9272	11.5864
Weimar; Stadt	16055000	Thuringia	31	169	0	0	0	FALSE	FALSE	50.9794	11.3297
Rohrberg	16061078	Thuringia	31	0	0	0	0	FALSE	FALSE	51.41	10.0219
Nürnberg	9564000	Bavaria	30	0	0	0	0	FALSE	FALSE	49.4556	11.0786
Wismar; Hansestadt	13074087	Mecklenburg-West Pomerania	30	0	0	0	0	FALSE	FALSE	53.8882	11.462
Göttingen; Stadt	3152012	Lower Saxony	0	14688	0	0	0	FALSE	FALSE	51.5339	9.93556
Bleicherode, Stadt	16062002	Thuringia	0	4348	0	0	0	FALSE	FALSE	51.4394	10.5714
Friedland	3152009	Lower Saxony	0	3282	0	0	0	FALSE	FALSE	51.4217	9.91444
Birkenfelde	16061007	Thuringia	0	219	0	0	0	FALSE	FALSE	51.3536	10.015
Sangerhausen, Stadt	15087370	Saxony-Anhalt	0	170	0	0	0	FALSE	FALSE	51.4731	11.2981
Urbach	16062054	Thuringia	0	67	0	0	0	FALSE	FALSE	51.4778	10.9
Dresden, Stadt	14612000	Saxony	0	39	0	0	0	FALSE	FALSE	51.0493	13.7384
Treffurt, Stadt	16063076	Thuringia	0	38	0	0	0	FALSE	FALSE	51.1367	10.2375
Kleinbodungen	16062025	Thuringia	0	37	0	0	0	FALSE	FALSE	51.4708	10.5283
Kelbra (Kyffhäuser), Stadt	15087250	Saxony-Anhalt	0	35	0	0	0	FALSE	FALSE	51.4333	11.0333
Seesen, Stadt	3153012	Lower Saxony	0	34	0	0	0	FALSE	FALSE	51.8931	10.1783
Dortmund, Stadt	5913000	North Rhine-Westphalia	0	34	0	0	0	FALSE	FALSE	51.5142	7.46389
Allstedt, Stadt	15087015	Saxony-Anhalt	0	33	0	0	0	FALSE	FALSE	51.4042	11.3872
Wollershausen	3152029	Lower Saxony	0	32	0	0	0	FALSE	FALSE	51.6	10.25
Neu-Eichenberg	6636009	Hessen	0	32	0	0	0	FALSE	FALSE	51.3794	9.90194
Schlotheim, Stadt	16064057	Thuringia	0	32	0	0	0	FALSE	FALSE	51.2469	10.6564
Seulingen	3152025	Lower Saxony	0	31	0	0	0	FALSE	FALSE	51.5408	10.1625
Nohra	16062039	Thuringia	0	31	0	0	0	FALSE	FALSE	50.9653	11.2339
Obermehler	16064052	Thuringia	0	31	0	0	0	FALSE	FALSE	51.2698	10.5969
Leuna, Stadt	15088205	Saxony-Anhalt	0	30	0	0	0	FALSE	FALSE	51.3167	12.0167
Großlohra	16062009	Thuringia	0	30	0	0	0	FALSE	FALSE	51.4167	10.65
Apolda		Thuringia	0	0	1	0	0	FALSE	FALSE	51.0262	11.5164
Bad Frankenhausen		Thuringia	0	0	0	1	0	FALSE	FALSE	51.3561	11.0998
Bad Liebenstein		Thuringia	0	0	0	1	0	FALSE	FALSE	50.8157	10.3512
Bad Salzungen		Thuringia	0	0	8	6	0	randomized	16th Nov 2022	50.8134	10.2361
Battgendorf		Thuringia	0	0	0	1	0	FALSE	FALSE	51.2044	11.2594
Beichlingen		Thuringia	0	0	0	1	0	randomized	1st Nov 2022	51.2326	11.2578
Bilzingsleben		Thuringia	0	0	1	0	0	FALSE	FALSE	51.2833	11.0667
Breitungen		Thuringia	0	0	1	0	0	FALSE	FALSE	50.7636	10.3272
Büchel		Thuringia	0	0	4	0	0	FALSE	FALSE	51.25	11.15
Buttstädt		Thuringia	0	0	3	1	0	FALSE	FALSE	51.1223	11.4172
Dermbach		Thuringia	0	0	1	0	0	FALSE	FALSE	50.7138	10.1184
Dieterode		Thuringia	0	0	1	0	0	FALSE	FALSE	51.3	10.1
Drei Gleichen		Thuringia	0	0	1	4	0	FALSE	FALSE	50.8667	10.8167
Eckstedt		Thuringia	0	0	1	0	0	FALSE	FALSE	51.0711	11.1461
Fambach		Thuringia	0	0	1	0	0	FALSE	FALSE	50.7333	10.3667
Gangloffsömmern		Thuringia	0	0	1	1	0	FALSE	FALSE	51.1894	10.9433
Gehofen		Thuringia	0	0	0	1	0	FALSE	FALSE	51.3227	11.32
Geismar		Thuringia	0	0	0	1	0	FALSE	FALSE	51.2317	10.1655
Georgenthal		Thuringia	0	0	2	0	0	FALSE	FALSE	50.8321	10.6627
Gerstungen		Thuringia	0	0	1	0	0	FALSE	FALSE	50.9667	10.0667
Gorsleben		Thuringia	0	0	1	0	0	FALSE	FALSE	51.2753	11.1844
Grabsleben		Thuringia	0	0	0	1	0	FALSE	FALSE	50.9363	10.8351
Gräfentonna		Thuringia	0	0	1	0	0	FALSE	FALSE	51.0911	10.7317
Großrudestedt		Thuringia	0	0	0	1	0	FALSE	FALSE	51.093	11.0998
Heldburg		Thuringia	0	0	1	0	0	FALSE	FALSE	50.275	10.7667
Hildburghausen		Thuringia	0	0	12	1	0	FALSE	FALSE	50.4255	10.7318
Hörselberg-Hainich		Thuringia	0	0	1	0	0	FALSE	FALSE	50.9906	10.4331
Hohenleuben		Thuringia	0	0	2	1	0	FALSE	FALSE	50.7113	12.0543
Kannawurf		Thuringia	0	0	1	1	0	FALSE	FALSE	51.2667	11.1331
Kindelbrück		Thuringia	0	0	3	5	0	FALSE	FALSE	51.2617	11.09
Kölleda		Thuringia	0	0	6	7	0	FALSE	FALSE	51.1875	11.2449
Krayenberggemeinde		Thuringia	0	0	1	0	0	FALSE	FALSE	50.8361	10.0864
Kutzleben		Thuringia	0	0	1	0	0	FALSE	FALSE	51.2	10.75
Leimbach		Thuringia	0	0	1	0	0	FALSE	FALSE	50.8167	10.2
Leubingen		Thuringia	0	0	2	0	0	FALSE	FALSE	51.2011	11.1522
Markvippach		Thuringia	0	0	0	2	0	FALSE	FALSE	51.0789	11.175
Meiningen		Thuringia	0	0	4	0	0	FALSE	FALSE	50.5679	10.4152
Nottertal Heilinger Hoehen		Thuringia	0	0	2	0	0	FALSE	FALSE	51.2375	10.6556
Ostramondra		Thuringia	0	0	0	1	0	FALSE	FALSE	51.2	11.3333
Pößneck		Thuringia	0	0	3	1	0	randomized	15th Nov 2022	50.6936	11.5923
Rastenberg		Thuringia	0	0	0	1	0	FALSE	FALSE	51.175	11.4203
Rothenberga		Thuringia	0	0	1	0	0	FALSE	FALSE	51.2003	11.4242
Schallenburg		Thuringia	0	0	1	0	0	FALSE	FALSE	51.1408	11.0828
Schloßvippach		Thuringia	0	0	2	0	0	FALSE	FALSE	51.105	11.1451
Schwabhausen		Thuringia	0	0	1	0	0	FALSE	FALSE	50.8885	10.7311
Sömmerda		Thuringia	0	0	12	10	0	randomized	1st Nov 2022	51.1591	11.1152
Sonneberg		Thuringia	0	0	1	0	0	FALSE	FALSE	50.3592	11.1746
Sonneborn		Thuringia	0	0	2	0	0	FALSE	FALSE	50.9927	10.5917
Stödten		Thuringia	0	0	1	0	0	FALSE	FALSE	51.1872	11.1787
Tiefenort		Thuringia	0	0	2	0	0	FALSE	FALSE	50.8395	10.166
Trebra		Thuringia	0	0	0	1	0	FALSE	FALSE	51.2833	10.9833
Udestedt		Thuringia	0	0	2	0	0	FALSE	FALSE	51.05	11.1333
Untermaßfeld		Thuringia	0	0	3	0	0	FALSE	FALSE	50.5441	10.3665
Vacha		Thuringia	0	0	1	1	0	FALSE	FALSE	50.8279	10.0218
Vogelsberg		Thuringia	0	0	1	1	0	FALSE	FALSE	51.1333	11.25
Weißensee		Thuringia	0	0	0	1	0	FALSE	FALSE	51.1999	11.0691
Wölfis		Thuringia	0	0	1	0	0	FALSE	FALSE	50.8083	10.7791
Wundersleben		Thuringia	0	0	0	1	0	FALSE	FALSE	51.1544	11.0389
Zella-Mehlis		Thuringia	0	0	1	0	0	FALSE	FALSE	50.6564	10.6605
Zeulenroda		Thuringia	0	0	0	1	0	FALSE	FALSE	50.6528	11.9838
