# Supplementary material for: Leveraging mobility data to analyze persistent SARS-CoV-2 mutations and inform targeted genomic surveillance
Source: eLife. 2025 Jan 15;13:RP94045. doi: 10.7554/eLife.94045 (PMC11735024; doi:10.7554/eLife.94045)
Supplement: Supplementary file 4. [file elife-94045-supp4.xlsx]

## Sheet: supplementary_file_3-alpha-line
strain	Sample_ID	institute	virus	Host	Pango_lineage	Nextstrain_clade	date	region	country	division	sub_division	location	plz	coordinates.Lat	coordinates.Long	Query_Length	Ambiguous_Bases
6033da1e03524b6f247adae4	vi028476	IIMK	ncov	Human	B.1.1.7	20I (Alpha, V1)	2021-02-18	Europe	Germany	Thuringia		apolda		51.0237	11.5128	29884	189
602bf0c027871742eae0f929	DN0049_05020469	IIMK	ncov	Human	B.1.1.7	20I (Alpha, V1)	2021-02-05	Europe	Germany	Thuringia		remptendorf	7368	50.5284	11.6598	29885	198
602bf0c027871742eae0f937	DN0063_06020160	IIMK	ncov	Human	B.1.1.7	20I (Alpha, V1)	2021-02-06	Europe	Germany	Thuringia		grabfeld	98631	50.4539	10.4404	29884	189
6033da1e03524b6f247adada	vi018837	IIMK	ncov	Human	B.1.1.7	20I (Alpha, V1)	2021-02-02	Europe	Germany	Thuringia		weimar		50.9803	11.3272	29884	1250
6010341e0bf63718dcf7c4fe	AN2184	IIMK	ncov	Human	B.1.1.7	20I (Alpha, V1)	2021-01-22	Europe	Germany	Thuringia		meiningen		50.5678	10.4164	29884	189
6033cf0c7179061f7deced15	DN0101_10022223	IIMK	ncov	Human	B.1.1.7	20I (Alpha, V1)	2021-02-10	Europe	Germany	Thuringia		saalfeld	7318	50.6477	11.3596	29884	189
6033cf0c7179061f7dececf9	DN0073_08021055	IIMK	ncov	Human	B.1.1.7	20I (Alpha, V1)	2021-02-08	Europe	Germany	Thuringia		schleiz	7907	50.5774	11.8089	29884	189
602bf0c027871742eae0f93d	DN0069_05022062	IIMK	ncov	Human	B.1.1.7	20I (Alpha, V1)	2021-02-05	Europe	Germany	Thuringia		hirschberg	7927	50.4036	11.8202	29884	189
6033cf0c7179061f7dececff	DN0079_09020456	IIMK	ncov	Human	B.1.1.7	20I (Alpha, V1)	2021-02-09	Europe	Germany	Thuringia		schleiz	7907	50.5774	11.8089	29884	189
602bf0c027871742eae0f927	DN0047_02020632	IIMK	ncov	Human	B.1.1.7	20I (Alpha, V1)	2021-02-02	Europe	Germany	Thuringia		weimar	99425	50.9803	11.3272	29884	190
6023d2d382b6682ea5958d5b	DN0022_29011064	IIMK	ncov	Human	B.1.1.7	20I (Alpha, V1)	2021-01-29	Europe	Germany	Thuringia		schleiz	7907	50.5774	11.8089	29884	189
6033cf0c7179061f7deced00	DN0080_09020457	IIMK	ncov	Human	B.1.1.7	20I (Alpha, V1)	2021-02-09	Europe	Germany	Thuringia		schleiz	7907	50.5774	11.8089	29884	189
6033cf0c7179061f7deced05	DN0085_10020252	IIMK	ncov	Human	B.1.1.7	20I (Alpha, V1)	2021-02-10	Europe	Germany	Thuringia		greiz	7973	50.6564	12.1996	29884	189
603537198a2e9463ae5b6f17	AN4274	IIMK	ncov	Human	B.1.1.7	20I (Alpha, V1)	2021-02-11	Europe	Germany	Thuringia		mühlhausen	99974	51.2088	10.459	29884	189
6033cf0c7179061f7deced22	DN0114_09022161	IIMK	ncov	Human	B.1.1.7	20I (Alpha, V1)	2021-02-09	Europe	Germany	Thuringia		schleiz	7907	50.5774	11.8089	29903	224
6033da1e03524b6f247adadf	vi020518	IIMK	ncov	Human	B.1.1.7	20I (Alpha, V1)	2021-02-04	Europe	Germany	Thuringia		jena		50.9283	11.5853	29884	194
6033cf0c7179061f7deced26	DN0118_14020070	IIMK	ncov	Human	B.1.1.7	20I (Alpha, V1)	2021-02-12	Europe	Germany	Thuringia		vacha	36404	50.8256	10.0231	29884	189
603537198a2e9463ae5b6f15	AN3990	IIMK	ncov	Human	B.1.1.7	20I (Alpha, V1)	2021-02-10	Europe	Germany	Thuringia		meiningen	98617	50.5678	10.4164	29884	189
603537198a2e9463ae5b6f13	AN3986	IIMK	ncov	Human	B.1.1.7	20I (Alpha, V1)	2021-02-10	Europe	Germany	Thuringia		meiningen	98617	50.5678	10.4164	29884	1075
602bf0c027871742eae0f931	DN0057_06020077	IIMK	ncov	Human	B.1.1.7	20I (Alpha, V1)	2021-02-06	Europe	Germany	Thuringia		sollstedt	99759	51.4144	10.5373	29884	189
607eb409e72c6f56444770d7	N0080639	IIMK	ncov	Human	B.1.1.7	20I (Alpha, V1)	2021-04-06	Europe	Germany	Thuringia		neustadt am rennsteig		50.5829	10.9337	29884	4995
609122753e729a26cc55eb92	N0098851	IIMK	ncov	Human	B.1.1.7	20I (Alpha, V1)	2021-04-26	Europe	Germany	Thuringia		neustadt am rennsteig		50.5829	10.9337	29884	3138
6040b371f7fbde3ec28b5b8a	DN0136_15020760	IIMK	ncov	Human	B.1.1.7	20I (Alpha, V1)	2021-02-11	Europe	Germany	Thuringia		föritztal	96524	50.3365	11.2318	29884	189
607554cd2531781a6b94266e	AN7330	IIMK	ncov	Human	B.1.1.7	20I (Alpha, V1)	2021-03-31	Europe	Germany	Thuringia		sonneberg	96515	50.3555	11.169	29883	189
6037afee0f2bec70bc1db30c	vi031803	IIMK	ncov	Human	B.1.1.7	20I (Alpha, V1)	2021-02-23	Europe	Germany	Thuringia		apolda	99510	51.0237	11.5128	29884	340
603e138084693c782d57e80c	vi033262	IIMK	ncov	Human	B.1.1.7	20I (Alpha, V1)	2021-02-25	Europe	Germany	Thuringia		jena		50.9283	11.5853	29884	189
6040b371f7fbde3ec28b5b65	DN0099_10022150	IIMK	ncov	Human	B.1.1.7	20I (Alpha, V1)	2021-02-09	Europe	Germany	Thuringia		heldburg	98663	50.2795	10.7255	29884	1183
605a173197a2743e9aace254	AN6239	IIMK	ncov	Human	B.1.1.7	20I (Alpha, V1)	2021-03-15	Europe	Germany	Thuringia		eisenach	99817	50.9757	10.3201	29884	189
60914e148fc9b8496fa64229	AN8730	IIMK	ncov	Human	B.1.1.7	20I (Alpha, V1)	2021-04-22	Europe	Germany	Thuringia		nordhausen	99734	51.4946	10.7878	29884	189
6040b371f7fbde3ec28b5ba3	DN0166_19020355	IIMK	ncov	Human	B.1.1.7	20I (Alpha, V1)	2021-02-19	Europe	Germany	Thuringia		kamsdorf	7334	50.645	11.4418	29884	189
6049de140b6af120b596140c	AN5559	IIMK	ncov	Human	B.1.1.7	20I (Alpha, V1)	2021-03-02	Europe	Germany	Thuringia		apolda	99510	51.0237	11.5128	29884	189
6050d93024f3782c72e1efca	AN5612	IIMK	ncov	Human	B.1.1.7	20I (Alpha, V1)	2021-03-04	Europe	Germany	Thuringia		meiningen	98617	50.5678	10.4164	29884	189
6051fb9a2a30c4522feafe75	vi040194	IIMK	ncov	Human	B.1.1.7	20I (Alpha, V1)	2021-03-09	Europe	Germany	Thuringia		erfurt	99099	50.9775	11.0251	29885	1016
605a173197a2743e9aace25d	AN6316	IIMK	ncov	Human	B.1.1.7	20I (Alpha, V1)	2021-03-16	Europe	Germany	Thuringia		worbis	37339	51.4188	10.3625	29884	189
607e97e8df98373a001384b6	AN8015	IIMK	ncov	Human	B.1.1.7	20I (Alpha, V1)	2021-04-13	Europe	Germany	Thuringia		suhl	98527	50.609	10.6907	29884	1144
607eb409e72c6f56444770dd	N0085634	IIMK	ncov	Human	B.1.1.7	20I (Alpha, V1)	2021-04-12	Europe	Germany	Thuringia		neustadt am rennsteig		50.5829	10.9337	29884	1183
609122753e729a26cc55eb8b	N0093962	IIMK	ncov	Human	B.1.1.7	20I (Alpha, V1)	2021-04-20	Europe	Germany	Thuringia		neustadt am rennsteig		50.5829	10.9337	29884	189
6037afee0f2bec70bc1db308	vi029395	IIMK	ncov	Human	B.1.1.7	20I (Alpha, V1)	2021-02-19	Europe	Germany	Thuringia		bad sulza	99518	51.088	11.6251	29884	396
609122753e729a26cc55eb91	N0097673	IIMK	ncov	Human	B.1.1.7	20I (Alpha, V1)	2021-04-26	Europe	Germany	Thuringia		neustadt am rennsteig		50.5829	10.9337	29884	189
6040b371f7fbde3ec28b5ba0	DN0163_20020077	IIMK	ncov	Human	B.1.1.7	20I (Alpha, V1)	2021-02-20	Europe	Germany	Thuringia		nordhausen	99734	51.4946	10.7878	29884	189
6050d93024f3782c72e1efd3	AN5780	IIMK	ncov	Human	B.1.1.7	20I (Alpha, V1)	2021-03-08	Europe	Germany	Thuringia		heiligenstadt	37308	51.378	10.1376	29884	189
606435636d608a50d2b4ee7c	AN6467	IIMK	ncov	Human	B.1.1.7	20I (Alpha, V1)	2021-03-19	Europe	Germany	Thuringia		meiningen	98617	50.5678	10.4164	29884	189
607554cd2531781a6b942665	AN7066	IIMK	ncov	Human	B.1.1.7	20I (Alpha, V1)	2021-03-29	Europe	Germany	Thuringia		eisenach	99817	50.9757	10.3201	29884	189
6076a81505996601b7a4884b	vi061938	IIMK	ncov	Human	B.1.1.7	20I (Alpha, V1)	2021-04-11	Europe	Germany	Thuringia		apolda	99510	51.0237	11.5128	29884	189
60914e148fc9b8496fa64227	AN8592	IIMK	ncov	Human	B.1.1.7	20I (Alpha, V1)	2021-04-22	Europe	Germany	Thuringia		suhl	98527	50.609	10.6907	29884	189
609a9b0490e5a76fb29bb128	AN10015	IIMK	ncov	Human	B.1.1.7	20I (Alpha, V1)	2021-05-05	Europe	Germany	Thuringia		mühlhausen	99974	51.2088	10.459	29884	566
6051fb9a2a30c4522feafe81	vi040027	IIMK	ncov	Human	B.1.1.7	20I (Alpha, V1)	2021-03-08	Europe	Germany	Thuringia		jena	7747	50.9283	11.5853	29884	189
609a9b0490e5a76fb29bb123	AN9840	IIMK	ncov	Human	B.1.1.7	20I (Alpha, V1)	2021-05-03	Europe	Germany	Thuringia		meiningen	98617	50.5678	10.4164	29884	189
6037afee0f2bec70bc1db30a	vi029603	IIMK	ncov	Human	B.1.1.7	20I (Alpha, V1)	2021-02-19	Europe	Germany	Thuringia		stadtroda	7646	50.86	11.7281	29884	121
603e138084693c782d57e810	vi033584	IIMK	ncov	Human	B.1.1.7	20I (Alpha, V1)	2021-02-25	Europe	Germany	Thuringia		jena	7751	50.9283	11.5853	29884	189
6037afee0f2bec70bc1db300	vi021166	IIMK	ncov	Human	B.1.1.7	20I (Alpha, V1)	2021-02-05	Europe	Germany	Thuringia		weimar	99425	50.9803	11.3272	29884	121
6040b371f7fbde3ec28b5b7a	DN0120_08020147	IIMK	ncov	Human	B.1.1.7	20I (Alpha, V1)	2021-02-08	Europe	Germany	Thuringia		neustadt an der orla	7806	50.7367	11.7444	29893	4092
6040b371f7fbde3ec28b5bad	DN0176_19021019	IIMK	ncov	Human	B.1.1.7	20I (Alpha, V1)	2021-02-19	Europe	Germany	Thuringia		berga/elster	7980	50.7503	12.1607	29884	189
6049de140b6af120b5961407	AN5513	IIMK	ncov	Human	B.1.1.7	20I (Alpha, V1)	2021-03-01	Europe	Germany	Thuringia		bad salzungen	36433	50.8117	10.2327	29884	189
6049de140b6af120b596140a	AN5534	IIMK	ncov	Human	B.1.1.7	20I (Alpha, V1)	2021-03-02	Europe	Germany	Thuringia		heiligenstadt	37308	51.378	10.1376	29884	189
607554cd2531781a6b942667	AN7108	IIMK	ncov	Human	B.1.1.7	20I (Alpha, V1)	2021-03-29	Europe	Germany	Thuringia		apolda	99510	51.0237	11.5128	29884	189
603e696384693c782d57e818	AN4992	IIMK	ncov	Human	B.1.1.7	20I (Alpha, V1)	2021-02-22	Europe	Germany	Thuringia		heiligenstadt	37308	51.378	10.1376	29884	189
6040b371f7fbde3ec28b5b8e	DN0140_16021222	IIMK	ncov	Human	B.1.1.7	20I (Alpha, V1)	2021-02-16	Europe	Germany	Thuringia		saalfeld	7318	50.6477	11.3596	29884	189
6040b371f7fbde3ec28b5b99	DN0151_14020072	IIMK	ncov	Human	B.1.1.7	20I (Alpha, V1)	2021-02-12	Europe	Germany	Thuringia		sömmerda	99610	51.1627	11.1157	29884	189
6040b371f7fbde3ec28b5b91	DN0143_16021225	IIMK	ncov	Human	B.1.1.7	20I (Alpha, V1)	2021-02-16	Europe	Germany	Thuringia		saalfeld	7318	50.6477	11.3596	29884	189
6050d93024f3782c72e1efd5	AN5783	IIMK	ncov	Human	B.1.1.7	20I (Alpha, V1)	2021-03-08	Europe	Germany	Thuringia		heiligenstadt	37308	51.378	10.1376	29884	189
60643ab46d608a50d2b4ee94	vi050451	IIMK	ncov	Human	B.1.1.7	20I (Alpha, V1)	2021-03-23	Europe	Germany	Thuringia		jena	7747	50.9283	11.5853	29884	973
6048a37be05c296fb1eb7897	vi038361	IIMK	ncov	Human	B.1.1.7	20I (Alpha, V1)	2021-03-05	Europe	Germany	Thuringia		jena	7743	50.9283	11.5853	29884	4945
6048a37be05c296fb1eb7889	vi035427	IIMK	ncov	Human	B.1.1.7	20I (Alpha, V1)	2021-03-01	Europe	Germany	Thuringia		jena	7747	50.9283	11.5853	29884	196
605a173197a2743e9aace255	AN6240	IIMK	ncov	Human	B.1.1.7	20I (Alpha, V1)	2021-03-15	Europe	Germany	Thuringia		eisenach	99817	50.9757	10.3201	29884	189
605b4607d5323d75966f97a5	vi045434	IIMK	ncov	Human	B.1.1.7	20I (Alpha, V1)	2021-03-16	Europe	Germany	Thuringia		camburg	7774	51.0514	11.7055	29884	189
607554cd2531781a6b94266c	AN7250	IIMK	ncov	Human	B.1.1.7	20I (Alpha, V1)	2021-03-31	Europe	Germany	Thuringia		apolda	99510	51.0237	11.5128	29884	189
607eb409e72c6f56444770de	N0085636	IIMK	ncov	Human	B.1.1.7	20I (Alpha, V1)	2021-04-12	Europe	Germany	Thuringia		neustadt am rennsteig		50.5829	10.9337	29884	189
609122753e729a26cc55eb95	N0098854	IIMK	ncov	Human	B.1.1.7	20I (Alpha, V1)	2021-04-26	Europe	Germany	Thuringia		neustadt am rennsteig		50.5829	10.9337	29884	189
6040b371f7fbde3ec28b5baa	DN0173_18021118	IIMK	ncov	Human	B.1.1.7	20I (Alpha, V1)	2021-02-18	Europe	Germany	Thuringia		gera	7545	50.8753	12.0788	29902	7263
6040b371f7fbde3ec28b5ba4	DN0167_18021311	IIMK	ncov	Human	B.1.1.7	20I (Alpha, V1)	2021-02-18	Europe	Germany	Thuringia		rudolstadt	7407	50.7193	11.34	29884	4336
6049de140b6af120b59613fa	AN5217	IIMK	ncov	Human	B.1.1.7	20I (Alpha, V1)	2021-02-25	Europe	Germany	Thuringia		meiningen	98617	50.5678	10.4164	29884	190
605b4607d5323d75966f979c	vi040973	IIMK	ncov	Human	B.1.1.7	20I (Alpha, V1)	2021-03-09	Europe	Germany	Thuringia		lehnstedt	99441	50.9403	11.4369	29884	2113
60643ab46d608a50d2b4ee92	vi050132	IIMK	ncov	Human	B.1.1.7	20I (Alpha, V1)	2021-03-23	Europe	Germany	Thuringia		jena	7747	50.9283	11.5853	29884	189
609bc1f42328e94081932bba	vi080798	IIMK	ncov	Human	B.1.1.7	20I (Alpha, V1)	2021-05-06	Europe	Germany	Thuringia		jena	7747	50.9283	11.5853	29884	190
609bc1f42328e94081932bb9	vi080797	IIMK	ncov	Human	B.1.1.7	20I (Alpha, V1)	2021-05-06	Europe	Germany	Thuringia		jena	7747	50.9283	11.5853	29884	189
603e696384693c782d57e81d	AN5058	IIMK	ncov	Human	B.1.1.7	20I (Alpha, V1)	2021-02-23	Europe	Germany	Thuringia		meiningen	98617	50.5678	10.4164	29884	189
6048a37be05c296fb1eb7890	vi037756	IIMK	ncov	Human	B.1.1.7	20I (Alpha, V1)	2021-03-04	Europe	Germany	Thuringia		jena	7749	50.9283	11.5853	29884	339
6051fb9a2a30c4522feafe83	vi044683	IIMK	ncov	Human	B.1.1.7	20I (Alpha, V1)	2021-03-15	Europe	Germany	Thuringia		weimar	99427	50.9803	11.3272	29884	189
6033cf0c7179061f7deced0e	DN0094_10021092	IIMK	ncov	Human	B.1.1.7	20I (Alpha, V1)	2021-02-10	Europe	Germany	Thuringia		bad blankenburg	7422	50.6829	11.2723	29884	190
605a173197a2743e9aace251	AN6234	IIMK	ncov	Human	B.1.1.7	20I (Alpha, V1)	2021-03-15	Europe	Germany	Thuringia		eisenach	99817	50.9757	10.3201	29884	189
60643ab46d608a50d2b4eea0	vi052444	IIMK	ncov	Human	B.1.1.7	20I (Alpha, V1)	2021-03-25	Europe	Germany	Thuringia		jena	7751	50.9283	11.5853	29884	190
607554cd2531781a6b942669	AN7193	IIMK	ncov	Human	B.1.1.7	20I (Alpha, V1)	2021-03-30	Europe	Germany	Thuringia		römhild	98630	50.3967	10.5385	29884	189
60881efb48e9a8389a37d195	AN8337	IIMK	ncov	Human	B.1.1.7	20I (Alpha, V1)	2021-04-16	Europe	Germany	Thuringia		marolterode	99994	51.2316	10.6809	29884	189
6040b371f7fbde3ec28b5b82	DN0128_15021300	IIMK	ncov	Human	B.1.1.7	20I (Alpha, V1)	2021-02-15	Europe	Germany	Thuringia		rudolstadt	7407	50.7193	11.34	29884	189
6048a37be05c296fb1eb788f	vi036463	IIMK	ncov	Human	B.1.1.7	20I (Alpha, V1)	2021-03-02	Europe	Germany	Thuringia		jena	7747	50.9283	11.5853	29884	339
6049de140b6af120b596140d	AN5586	IIMK	ncov	Human	B.1.1.7	20I (Alpha, V1)	2021-03-02	Europe	Germany	Thuringia		heiligenstadt	37308	51.378	10.1376	29884	189
605a173197a2743e9aace25c	AN6314	IIMK	ncov	Human	B.1.1.7	20I (Alpha, V1)	2021-03-16	Europe	Germany	Thuringia		wutha-farnroda	99848	50.955	10.3905	29894	5999
607e97e8df98373a001384b0	AN7965	IIMK	ncov	Human	B.1.1.7	20I (Alpha, V1)	2021-04-13	Europe	Germany	Thuringia		mühlhausen	99974	51.2088	10.459	29884	189
60881efb48e9a8389a37d194	AN8336	IIMK	ncov	Human	B.1.1.7	20I (Alpha, V1)	2021-04-16	Europe	Germany	Thuringia		marolterode	99994	51.2316	10.6809	29884	189
6048a37be05c296fb1eb7885	vi034570	IIMK	ncov	Human	B.1.1.7	20I (Alpha, V1)	2021-02-28	Europe	Germany	Thuringia		rosenthal am rennsteig	7366	50.4181	11.684	29893	7772
6049de140b6af120b5961401	AN5466	IIMK	ncov	Human	B.1.1.7	20I (Alpha, V1)	2021-03-01	Europe	Germany	Thuringia		meiningen	98617	50.5678	10.4164	29884	4305
60892a8f887db84d42721d76	vi069562	IIMK	ncov	Human	B.1.1.7	20I (Alpha, V1)	2021-04-21	Europe	Germany	Thuringia		jena	7743	50.9283	11.5853	29884	189
609122753e729a26cc55eb93	N0097674	IIMK	ncov	Human	B.1.1.7	20I (Alpha, V1)	2021-04-26	Europe	Germany	Thuringia		neustadt am rennsteig		50.5829	10.9337	29884	189
60914e148fc9b8496fa6422d	AN9276	IIMK	ncov	Human	B.1.1.7	20I (Alpha, V1)	2021-04-16	Europe	Germany	Thuringia		mühlhausen	99974	51.2088	10.459	29884	189
60881efb48e9a8389a37d196	AN8338	IIMK	ncov	Human	B.1.1.7	20I (Alpha, V1)	2021-04-16	Europe	Germany	Thuringia		marolterode	99994	51.2316	10.6809	29884	189
6040b371f7fbde3ec28b5b5b	DN0089_10022133	IIMK	ncov	Human	B.1.1.7	20I (Alpha, V1)	2021-02-09	Europe	Germany	Thuringia		apolda	99510	51.0237	11.5128	29884	1183
6048a37be05c296fb1eb7883	vi034487	IIMK	ncov	Human	B.1.1.7	20I (Alpha, V1)	2021-02-28	Europe	Germany	Thuringia		sömmerda	99610	51.1627	11.1157	29892	7099
6050d93024f3782c72e1efdb	AN6008	IIMK	ncov	Human	B.1.1.7	20I (Alpha, V1)	2021-03-10	Europe	Germany	Thuringia		eisenach	99817	50.9757	10.3201	29884	189
6065e70e43d414280b1f9e83	N0072397	IIMK	ncov	Human	B.1.1.7	20I (Alpha, V1)	2021-03-26	Europe	Germany	Thuringia		neustadt am rennsteig		50.5829	10.9337	29884	190
609bc1f42328e94081932bbc	vi080801	IIMK	ncov	Human	B.1.1.7	20I (Alpha, V1)	2021-05-06	Europe	Germany	Thuringia		jena	7747	50.9283	11.5853	29884	189
6037afee0f2bec70bc1db307	vi028955	IIMK	ncov	Human	B.1.1.7	20I (Alpha, V1)	2021-02-18	Europe	Germany	Thuringia		bad sulza	99518	51.088	11.6251	29884	121
6051fb9a2a30c4522feafe8d	vi043661	IIMK	ncov	Human	B.1.1.7	20I (Alpha, V1)	2021-03-14	Europe	Germany	Thuringia		jena	7747	50.9283	11.5853	29893	3773
605b4607d5323d75966f97bb	vi048343	IIMK	ncov	Human	B.1.1.7	20I (Alpha, V1)	2021-03-20	Europe	Germany	Thuringia		schleiz	7907	50.5774	11.8089	29884	189
60914e148fc9b8496fa64228	AN8611	IIMK	ncov	Human	B.1.1.7	20I (Alpha, V1)	2021-04-21	Europe	Germany	Thuringia		ummerstadt	98663	50.258	10.8117	29884	189
6037afee0f2bec70bc1db301	vi026495	IIMK	ncov	Human	B.1.1.7	20I (Alpha, V1)	2021-02-15	Europe	Germany	Thuringia		jena	7743	50.9283	11.5853	29884	396
6040b371f7fbde3ec28b5b90	DN0142_16021224	IIMK	ncov	Human	B.1.1.7	20I (Alpha, V1)	2021-02-16	Europe	Germany	Thuringia		saalfeld	7318	50.6477	11.3596	29884	189
6048a37be05c296fb1eb7880	vi034015	IIMK	ncov	Human	B.1.1.7	20I (Alpha, V1)	2021-02-26	Europe	Germany	Thuringia		jena	7751	50.9283	11.5853	29884	2607
6048a37be05c296fb1eb789b	vi038703	IIMK	ncov	Human	B.1.1.7	20I (Alpha, V1)	2021-03-06	Europe	Germany	Thuringia		jena	7751	50.9283	11.5853	29884	339
603537198a2e9463ae5b6f14	AN3977	IIMK	ncov	Human	B.1.1.7	20I (Alpha, V1)	2021-02-10	Europe	Germany	Thuringia		meiningen	98617	50.5678	10.4164	29884	189
6040b371f7fbde3ec28b5bae	DN0177_19021021	IIMK	ncov	Human	B.1.1.7	20I (Alpha, V1)	2021-02-19	Europe	Germany	Thuringia		greiz	7973	50.6564	12.1996	29884	189
6050d93024f3782c72e1efd8	AN5893	IIMK	ncov	Human	B.1.1.7	20I (Alpha, V1)	2021-03-08	Europe	Germany	Thuringia		suhl	98527	50.609	10.6907	29884	189
607554cd2531781a6b942673	AN7554	IIMK	ncov	Human	B.1.1.7	20I (Alpha, V1)	2021-04-06	Europe	Germany	Thuringia		apolda	99510	51.0237	11.5128	29884	189
609a9b0490e5a76fb29bb125	AN9952	IIMK	ncov	Human	B.1.1.7	20I (Alpha, V1)	2021-05-04	Europe	Germany	Thuringia		mühlhausen	99974	51.2088	10.459	29884	189
609bc1f42328e94081932bc0	vi081546	IIMK	ncov	Human	B.1.1.7	20I (Alpha, V1)	2021-05-08	Europe	Germany	Thuringia		jena	7747	50.9283	11.5853	29884	189
6051fb9a2a30c4522feafe80	vi043018	IIMK	ncov	Human	B.1.1.7	20I (Alpha, V1)	2021-03-12	Europe	Germany	Thuringia		jena	7743	50.9283	11.5853	29884	189
605a173197a2743e9aace25f	AN6319	IIMK	ncov	Human	B.1.1.7	20I (Alpha, V1)	2021-03-16	Europe	Germany	Thuringia		worbis	37339	51.4188	10.3625	29884	3340
605a173197a2743e9aace258	AN6264	IIMK	ncov	Human	B.1.1.7	20I (Alpha, V1)	2021-03-15	Europe	Germany	Thuringia		schleiz	7907	50.5774	11.8089	29884	5791
605b4607d5323d75966f97bf	vi049115	IIMK	ncov	Human	B.1.1.7	20I (Alpha, V1)	2021-03-22	Europe	Germany	Thuringia		hirschberg	7927	50.4036	11.8202	29884	189
60914e148fc9b8496fa6422a	AN8745	IIMK	ncov	Human	B.1.1.7	20I (Alpha, V1)	2021-04-23	Europe	Germany	Thuringia		meiningen	98617	50.5678	10.4164	29884	4410
609a9b0490e5a76fb29bb127	AN9963	IIMK	ncov	Human	B.1.1.7	20I (Alpha, V1)	2021-05-03	Europe	Germany	Thuringia		rossleben	6571	51.2937	11.3975	29884	1204
6037afee0f2bec70bc1db306	vi028608	IIMK	ncov	Human	B.1.1.7	20I (Alpha, V1)	2021-02-18	Europe	Germany	Thuringia		jena	7745	50.9283	11.5853	29884	121
605b4607d5323d75966f97a9	vi046924	IIMK	ncov	Human	B.1.1.7	20I (Alpha, V1)	2021-03-18	Europe	Germany	Thuringia		gotha	99867	50.9461	10.6962	29884	3338
607eb409e72c6f56444770d8	N0081532	IIMK	ncov	Human	B.1.1.7	20I (Alpha, V1)	2021-04-07	Europe	Germany	Thuringia		neustadt am rennsteig		50.5829	10.9337	29884	189
60914e148fc9b8496fa64225	AN8543	IIMK	ncov	Human	B.1.1.7	20I (Alpha, V1)	2021-04-21	Europe	Germany	Thuringia		bad salzungen	36433	50.8117	10.2327	29884	189
605a173197a2743e9aace261	AN6361	IIMK	ncov	Human	B.1.1.7	20I (Alpha, V1)	2021-03-17	Europe	Germany	Thuringia		eisenach	99817	50.9757	10.3201	29884	4744
605b4607d5323d75966f97a7	vi045547	IIMK	ncov	Human	B.1.1.7	20I (Alpha, V1)	2021-03-16	Europe	Germany	Thuringia		weimar	99427	50.9803	11.3272	29884	5066
607e97e8df98373a001384bc	AN8283	IIMK	ncov	Human	B.1.1.7	20I (Alpha, V1)	2021-04-12	Europe	Germany	Thuringia		mühlhausen	99974	51.2088	10.459	29884	189
60881efb48e9a8389a37d192	AN8331	IIMK	ncov	Human	B.1.1.7	20I (Alpha, V1)	2021-04-16	Europe	Germany	Thuringia		marolterode	99994	51.2316	10.6809	29884	189
60892a8f887db84d42721d72	vi070911	IIMK	ncov	Human	B.1.1.7	20I (Alpha, V1)	2021-04-23	Europe	Germany	Thuringia		hermsdorf	7629	50.8961	11.8579	29884	189
60643ab46d608a50d2b4ee9b	vi051504	IIMK	ncov	Human	B.1.1.7	20I (Alpha, V1)	2021-03-24	Europe	Germany	Thuringia		jena	7745	50.9283	11.5853	29885	1017
603e696384693c782d57e828	AN5394	IIMK	ncov	Human	B.1.1.7	20I (Alpha, V1)	2021-03-01	Europe	Germany	Thuringia		neuhaus am rennweg	98724	50.51	11.1387	29884	479
6040b371f7fbde3ec28b5b84	DN0130_16020817	IIMK	ncov	Human	B.1.1.7	20I (Alpha, V1)	2021-02-15	Europe	Germany	Thuringia		bad salzungen	36469	50.8117	10.2327	29884	189
6048a37be05c296fb1eb788a	vi036135	IIMK	ncov	Human	B.1.1.7	20I (Alpha, V1)	2021-03-02	Europe	Germany	Thuringia		grammetal	99428	50.9576	11.2199	29884	121
6048a37be05c296fb1eb7892	vi037809	IIMK	ncov	Human	B.1.1.7	20I (Alpha, V1)	2021-03-04	Europe	Germany	Thuringia		jena	7749	50.9283	11.5853	29893	8340
6076a81505996601b7a48851	vi058103	IIMK	ncov	Human	B.1.1.7	20I (Alpha, V1)	2021-04-05	Europe	Germany	Thuringia		apolda	99510	51.0237	11.5128	29884	189
609bc1f42328e94081932bbf	vi080806	IIMK	ncov	Human	B.1.1.7	20I (Alpha, V1)	2021-05-06	Europe	Germany	Thuringia		jena	7747	50.9283	11.5853	29884	189
603e138084693c782d57e80f	vi033570	IIMK	ncov	Human	B.1.1.7	20I (Alpha, V1)	2021-02-25	Europe	Germany	Thuringia		apolda	99510	51.0237	11.5128	29884	189
6040b371f7fbde3ec28b5ba1	DN0164_20020076	IIMK	ncov	Human	B.1.1.7	20I (Alpha, V1)	2021-02-20	Europe	Germany	Thuringia		ellrich	99755	51.5872	10.6655	29884	190
6048a37be05c296fb1eb7896	vi038359	IIMK	ncov	Human	B.1.1.7	20I (Alpha, V1)	2021-03-05	Europe	Germany	Thuringia		jena	7743	50.9283	11.5853	29884	2581
605a173197a2743e9aace25e	AN6317	IIMK	ncov	Human	B.1.1.7	20I (Alpha, V1)	2021-03-16	Europe	Germany	Thuringia		worbis	37339	51.4188	10.3625	29884	189
605a173197a2743e9aace250	AN6233	IIMK	ncov	Human	B.1.1.7	20I (Alpha, V1)	2021-03-15	Europe	Germany	Thuringia		eisenach	99817	50.9757	10.3201	29884	2113
605a173197a2743e9aace259	AN6283	IIMK	ncov	Human	B.1.1.7	20I (Alpha, V1)	2021-03-16	Europe	Germany	Thuringia		dermbach	36466	50.7158	10.1198	29884	2113
60643ab46d608a50d2b4ee9f	vi052261	IIMK	ncov	Human	B.1.1.7	20I (Alpha, V1)	2021-03-25	Europe	Germany	Thuringia		jena	7743	50.9283	11.5853	29884	189
607e97e8df98373a001384bd	AN8284	IIMK	ncov	Human	B.1.1.7	20I (Alpha, V1)	2021-04-01	Europe	Germany	Thuringia		mühlhausen	99974	51.2088	10.459	29868	189
605b4607d5323d75966f97b7	vi048143	IIMK	ncov	Human	B.1.1.7	20I (Alpha, V1)	2021-03-19	Europe	Germany	Thuringia		jena	7743	50.9283	11.5853	29884	189
605b4607d5323d75966f97bc	vi048360	IIMK	ncov	Human	B.1.1.7	20I (Alpha, V1)	2021-03-20	Europe	Germany	Thuringia		kahla	7768	50.802	11.5882	29884	189
607e97e8df98373a001384bb	AN8050	IIMK	ncov	Human	B.1.1.7	20I (Alpha, V1)	2021-04-13	Europe	Germany	Thuringia		suhl	98527	50.609	10.6907	29884	189
6080275c0a6df46e05b47170	vi066484	IIMK	ncov	Human	B.1.1.7	20I (Alpha, V1)	2021-04-17	Europe	Germany	Thuringia		ilmenau	98693	50.6862	10.9132	29884	1143
60892a8f887db84d42721d73	vi073308	IIMK	ncov	Human	B.1.1.7	20I (Alpha, V1)	2021-04-27	Europe	Germany	Thuringia		jena	7747	50.9283	11.5853	29884	189
6048a37be05c296fb1eb7888	vi035392	IIMK	ncov	Human	B.1.1.7	20I (Alpha, V1)	2021-03-01	Europe	Germany	Thuringia		apolda	99510	51.0237	11.5128	29893	4963
6048a37be05c296fb1eb7881	vi034026	IIMK	ncov	Human	B.1.1.7	20I (Alpha, V1)	2021-02-26	Europe	Germany	Thuringia		jena	7751	50.9283	11.5853	29883	3095
6051fb9a2a30c4522feafe70	vi040747	IIMK	ncov	Human	B.1.1.7	20I (Alpha, V1)	2021-03-09	Europe	Germany	Thuringia		ronneburg	7580	50.8628	12.1813	29893	4078
605b4607d5323d75966f979b	vi040841	IIMK	ncov	Human	B.1.1.7	20I (Alpha, V1)	2021-03-09	Europe	Germany	Thuringia		apolda	99510	51.0237	11.5128	29893	8552
606435636d608a50d2b4ee7d	AN6478	IIMK	ncov	Human	B.1.1.7	20I (Alpha, V1)	2021-03-19	Europe	Germany	Thuringia		eisenach	99817	50.9757	10.3201	29884	192
606435636d608a50d2b4ee88	AN6656	IIMK	ncov	Human	B.1.1.7	20I (Alpha, V1)	2021-03-23	Europe	Germany	Thuringia		meiningen	98617	50.5678	10.4164	29884	189
606435636d608a50d2b4ee89	AN6662	IIMK	ncov	Human	B.1.1.7	20I (Alpha, V1)	2021-03-23	Europe	Germany	Thuringia		meiningen	98617	50.5678	10.4164	29884	190
6080275c0a6df46e05b4716f	vi064147	IIMK	ncov	Human	B.1.1.7	20I (Alpha, V1)	2021-04-13	Europe	Germany	Thuringia		jena	7747	50.9283	11.5853	29884	189
6048a37be05c296fb1eb7899	vi038368	IIMK	ncov	Human	B.1.1.7	20I (Alpha, V1)	2021-03-05	Europe	Germany	Thuringia		jena	7751	50.9283	11.5853	29884	123
6048a37be05c296fb1eb7895	vi038357	IIMK	ncov	Human	B.1.1.7	20I (Alpha, V1)	2021-03-05	Europe	Germany	Thuringia		jena	7743	50.9283	11.5853	29883	3188
6051fb9a2a30c4522feafe88	vi039732	IIMK	ncov	Human	B.1.1.7	20I (Alpha, V1)	2021-03-08	Europe	Germany	Thuringia		jena	7743	50.9283	11.5853	29884	121
606435636d608a50d2b4ee84	AN6627	IIMK	ncov	Human	B.1.1.7	20I (Alpha, V1)	2021-03-21	Europe	Germany	Thuringia		hildburghausen	98646	50.4271	10.7244	29884	189
607e97e8df98373a001384a8	AN7822	IIMK	ncov	Human	B.1.1.7	20I (Alpha, V1)	2021-04-09	Europe	Germany	Thuringia		apolda	99510	51.0237	11.5128	29884	189
607e97e8df98373a001384b5	AN8011	IIMK	ncov	Human	Q.4	20I (Alpha, V1)	2021-04-13	Europe	Germany	Thuringia		crock	98673	50.4517	10.8859	29884	189
6048a37be05c296fb1eb78a3	vi036459	IIMK	ncov	Human	B.1.1.7	20I (Alpha, V1)	2021-03-02	Europe	Germany	Thuringia		greiz	7973	50.6564	12.1996	29884	3470
60881efb48e9a8389a37d198	AN8364	IIMK	ncov	Human	B.1.1.7	20I (Alpha, V1)	2021-04-14	Europe	Germany	Thuringia		apolda	99510	51.0237	11.5128	29884	189
603e696384693c782d57e81f	AN5093	IIMK	ncov	Human	B.1.1.7	20I (Alpha, V1)	2021-02-23	Europe	Germany	Thuringia		sömmerda	99610	51.1627	11.1157	29884	189
6040b371f7fbde3ec28b5b9f	DN0162_18020355	IIMK	ncov	Human	B.1.1.7	20I (Alpha, V1)	2021-02-18	Europe	Germany	Thuringia		ronneburg	7580	50.8628	12.1813	29884	189
6048a37be05c296fb1eb7891	vi037779	IIMK	ncov	Human	B.1.1.7	20I (Alpha, V1)	2021-03-04	Europe	Germany	Thuringia		eisenberg	7607	50.9689	11.8964	29883	378
60881efb48e9a8389a37d18e	AN8282	IIMK	ncov	Human	B.1.1.7	20I (Alpha, V1)	2021-04-16	Europe	Germany	Thuringia		sondershausen	99706	51.3677	10.8675	29884	4748
60881efb48e9a8389a37d193	AN8335	IIMK	ncov	Human	B.1.1.7	20I (Alpha, V1)	2021-04-16	Europe	Germany	Thuringia		marolterode	99994	51.2316	10.6809	29884	189
609122753e729a26cc55eb90	N0096175	IIMK	ncov	Human	B.1.1.7	20I (Alpha, V1)	2021-04-22	Europe	Germany	Thuringia		neustadt am rennsteig		50.5829	10.9337	29884	189
605b4607d5323d75966f97b9	vi048219	IIMK	ncov	Human	B.1.1.7	20I (Alpha, V1)	2021-03-20	Europe	Germany	Thuringia		stadtroda	7646	50.86	11.7281	29884	189
605a173197a2743e9aace24f	AN6196	IIMK	ncov	Human	B.1.1.7	20I (Alpha, V1)	2021-03-15	Europe	Germany	Thuringia		meiningen	98617	50.5678	10.4164	29884	564
605b4607d5323d75966f97b2	vi048055	IIMK	ncov	Human	B.1.1.7	20I (Alpha, V1)	2021-03-19	Europe	Germany	Thuringia		jena	7743	50.9283	11.5853	29884	189
606435636d608a50d2b4ee8c	AN6764	IIMK	ncov	Human	B.1.1.7	20I (Alpha, V1)	2021-03-24	Europe	Germany	Thuringia		meiningen	98617	50.5678	10.4164	29884	189
607e97e8df98373a001384b8	AN8028	IIMK	ncov	Human	B.1.1.7	20I (Alpha, V1)	2021-04-13	Europe	Germany	Thuringia		suhl	98527	50.609	10.6907	29884	189
607554cd2531781a6b942675	AN7558	IIMK	ncov	Human	B.1.1.7	20I (Alpha, V1)	2021-04-07	Europe	Germany	Thuringia		sonneberg	96515	50.3555	11.169	29884	189
607554cd2531781a6b942677	AN7598	IIMK	ncov	Human	B.1.1.7	20I (Alpha, V1)	2021-04-08	Europe	Germany	Thuringia		meiningen	98617	50.5678	10.4164	29884	189
607e97e8df98373a001384b1	AN7969	IIMK	ncov	Human	B.1.1.7	20I (Alpha, V1)	2021-04-13	Europe	Germany	Thuringia		apolda	99510	51.0237	11.5128	29884	189
609bc1f42328e94081932bbe	vi080805	IIMK	ncov	Human	B.1.1.7	20I (Alpha, V1)	2021-05-06	Europe	Germany	Thuringia		jena	7747	50.9283	11.5853	29884	4061
605a173197a2743e9aace260	AN6340	IIMK	ncov	Human	B.1.1.7	20I (Alpha, V1)	2021-03-17	Europe	Germany	Thuringia		wasungen	98634	50.6645	10.3697	29884	2814
6065e70e43d414280b1f9e7f	N0066853	IIMK	ncov	Human	B.1.1.7	20I (Alpha, V1)	2021-03-22	Europe	Germany	Thuringia		neustadt am rennsteig		50.5829	10.9337	29884	6371
607e97e8df98373a001384b3	AN7983	IIMK	ncov	Human	B.1.1.7	20I (Alpha, V1)	2021-04-14	Europe	Germany	Thuringia		mühlhausen	99974	51.2088	10.459	29884	189
60914e148fc9b8496fa64224	AN8536	IIMK	ncov	Human	B.1.1.7	20I (Alpha, V1)	2021-04-21	Europe	Germany	Thuringia		dingelstädt	37351	51.3156	10.3215	29872	1493
6037afee0f2bec70bc1db309	vi029527	IIMK	ncov	Human	B.1.1.7	20I (Alpha, V1)	2021-02-19	Europe	Germany	Thuringia		apolda	99510	51.0237	11.5128	29884	410
6040b371f7fbde3ec28b5b8c	DN0138_16021220	IIMK	ncov	Human	B.1.1.7	20I (Alpha, V1)	2021-02-16	Europe	Germany	Thuringia		saalfeld	7318	50.6477	11.3596	29884	189
6040b371f7fbde3ec28b5b8d	DN0139_16021221	IIMK	ncov	Human	B.1.1.7	20I (Alpha, V1)	2021-02-16	Europe	Germany	Thuringia		saalfeld	7318	50.6477	11.3596	29884	189
6051fb9a2a30c4522feafe8e	vi044524	IIMK	ncov	Human	B.1.1.7	20I (Alpha, V1)	2021-03-15	Europe	Germany	Thuringia		camburg	7774	51.0514	11.7055	29883	400
607eb409e72c6f56444770d6	N0080638	IIMK	ncov	Human	B.1.1.7	20I (Alpha, V1)	2021-04-06	Europe	Germany	Thuringia		neustadt am rennsteig		50.5829	10.9337	29884	189
607eb409e72c6f56444770dc	N0083446	IIMK	ncov	Human	B.1.1.7	20I (Alpha, V1)	2021-04-09	Europe	Germany	Thuringia		neustadt am rennsteig		50.5829	10.9337	29884	189
609270253d108d14e2765717	vi077898	IIMK	ncov	Human	B.1.1.7	20I (Alpha, V1)	2021-05-03	Europe	Germany	Thuringia		apolda	99510	51.0237	11.5128	29884	189
603e138084693c782d57e80d	vi033410	IIMK	ncov	Human	B.1.1.7	20I (Alpha, V1)	2021-02-25	Europe	Germany	Thuringia		jena	7743	50.9283	11.5853	29884	189
6048a37be05c296fb1eb7886	vi034571	IIMK	ncov	Human	B.1.1.7	20I (Alpha, V1)	2021-02-28	Europe	Germany	Thuringia		jena	7745	50.9283	11.5853	29884	121
6049de140b6af120b59613fe	AN5451	IIMK	ncov	Human	B.1.1.7	20I (Alpha, V1)	2021-03-01	Europe	Germany	Thuringia		meiningen	98617	50.5678	10.4164	29884	189
605a173197a2743e9aace25b	AN6300	IIMK	ncov	Human	B.1.1.7	20I (Alpha, V1)	2021-03-16	Europe	Germany	Thuringia		meiningen	98617	50.5678	10.4164	29884	189
605a173197a2743e9aace257	AN6242	IIMK	ncov	Human	B.1.1.7	20I (Alpha, V1)	2021-03-15	Europe	Germany	Thuringia		eisenach	99817	50.9757	10.3201	29884	4020
6076a81505996601b7a4884d	vi060817	IIMK	ncov	Human	B.1.1.7	20I (Alpha, V1)	2021-04-08	Europe	Germany	Thuringia		bad sulza	99518	51.088	11.6251	29884	189
603e696384693c782d57e81b	AN5037	IIMK	ncov	Human	B.1.1.7	20I (Alpha, V1)	2021-02-22	Europe	Germany	Thuringia		eisenach	99817	50.9757	10.3201	29884	189
6040b371f7fbde3ec28b5b83	DN0129_13020085	IIMK	ncov	Human	B.1.1.7	20I (Alpha, V1)	2021-02-13	Europe	Germany	Thuringia		schleusingen	98553	50.5098	10.7543	29884	189
6051fb9a2a30c4522feafe7c	vi043019	IIMK	ncov	Human	B.1.1.7	20I (Alpha, V1)	2021-03-12	Europe	Germany	Thuringia		jena	7747	50.9283	11.5853	29893	5215
60643ab46d608a50d2b4ee93	vi050439	IIMK	ncov	Human	B.1.1.7	20I (Alpha, V1)	2021-03-23	Europe	Germany	Thuringia		jena	7749	50.9283	11.5853	29884	189
609122753e729a26cc55eb8e	N0096174	IIMK	ncov	Human	B.1.1.7	20I (Alpha, V1)	2021-04-22	Europe	Germany	Thuringia		neustadt am rennsteig		50.5829	10.9337	29884	189
6051fb9a2a30c4522feafe73	vi043665	IIMK	ncov	Human	B.1.1.7	20I (Alpha, V1)	2021-03-14	Europe	Germany	Thuringia		weimar	99427	50.9803	11.3272	29893	3066
6051fb9a2a30c4522feafe74	vi040294	IIMK	ncov	Human	B.1.1.7	20I (Alpha, V1)	2021-03-08	Europe	Germany	Thuringia		weimar	99427	50.9803	11.3272	29887	1324
606435636d608a50d2b4ee87	AN6644	IIMK	ncov	Human	B.1.1.7	20I (Alpha, V1)	2021-03-22	Europe	Germany	Thuringia		meiningen	98617	50.5678	10.4164	29884	190
607554cd2531781a6b942672	AN7544	IIMK	ncov	Human	B.1.1.7	20I (Alpha, V1)	2021-04-06	Europe	Germany	Thuringia		sonneberg	96515	50.3555	11.169	29883	191
6040b371f7fbde3ec28b5bb1	DN0180_19020391	IIMK	ncov	Human	B.1.1.7	20I (Alpha, V1)	2021-02-19	Europe	Germany	Thuringia		ronneburg	7580	50.8628	12.1813	29884	189
6050d93024f3782c72e1efcb	AN5617	IIMK	ncov	Human	B.1.1.7	20I (Alpha, V1)	2021-03-04	Europe	Germany	Thuringia		meiningen	98617	50.5678	10.4164	29884	189
606435636d608a50d2b4ee8d	AN6775	IIMK	ncov	Human	B.1.1.7	20I (Alpha, V1)	2021-03-23	Europe	Germany	Thuringia		heiligenstadt	37308	51.378	10.1376	29884	189
607e97e8df98373a001384b7	AN8019	IIMK	ncov	Human	B.1.1.7	20I (Alpha, V1)	2021-04-13	Europe	Germany	Thuringia		suhl	98527	50.609	10.6907	29884	189
6080275c0a6df46e05b47174	vi063574	IIMK	ncov	Human	B.1.1.7	20I (Alpha, V1)	2021-04-13	Europe	Germany	Thuringia		stadtroda	7646	50.86	11.7281	29884	189
6037afee0f2bec70bc1db303	vi027100	IIMK	ncov	Human	B.1.1.7	20I (Alpha, V1)	2021-02-16	Europe	Germany	Thuringia		jena	7751	50.9283	11.5853	29884	122
605b4607d5323d75966f97c1	vi049540	IIMK	ncov	Human	B.1.1.7	20I (Alpha, V1)	2021-03-22	Europe	Germany	Thuringia		apolda	99510	51.0237	11.5128	29884	189
607554cd2531781a6b942664	AN7045	IIMK	ncov	Human	B.1.1.7	20I (Alpha, V1)	2021-03-27	Europe	Germany	Thuringia		heiligenstadt	37308	51.378	10.1376	29884	189
607e97e8df98373a001384ba	AN8044	IIMK	ncov	Human	B.1.1.7	20I (Alpha, V1)	2021-04-13	Europe	Germany	Thuringia		suhl	98527	50.609	10.6907	29884	189
609122753e729a26cc55eb8f	N0095462	IIMK	ncov	Human	B.1.1.7	20I (Alpha, V1)	2021-04-22	Europe	Germany	Thuringia		neustadt am rennsteig		50.5829	10.9337	29884	189
609a9b0490e5a76fb29bb11d	AN9644	IIMK	ncov	Human	B.1.1.7	20I (Alpha, V1)	2021-04-30	Europe	Germany	Thuringia		meiningen	98617	50.5678	10.4164	29884	189
609a9b0490e5a76fb29bb122	AN9787	IIMK	ncov	Human	B.1.1.7	20I (Alpha, V1)	2021-05-03	Europe	Germany	Thuringia		bad salzungen	36433	50.8117	10.2327	29884	189
6040b371f7fbde3ec28b5b8b	DN0137_16021218	IIMK	ncov	Human	B.1.1.7	20I (Alpha, V1)	2021-02-16	Europe	Germany	Thuringia		saalfeld	7318	50.6477	11.3596	29884	189
6051fb9a2a30c4522feafe7f	vi042565	IIMK	ncov	Human	B.1.1.7	20I (Alpha, V1)	2021-03-11	Europe	Germany	Thuringia		lehnstedt	99441	50.9403	11.4369	29885	1016
6065e70e43d414280b1f9e80	N0066860	IIMK	ncov	Human	B.1.1.7	20I (Alpha, V1)	2021-03-22	Europe	Germany	Thuringia		neustadt am rennsteig		50.5829	10.9337	29884	1183
6037afee0f2bec70bc1db30e	vi031813	IIMK	ncov	Human	B.1.1.7	20I (Alpha, V1)	2021-02-23	Europe	Germany	Thuringia		jena	7751	50.9283	11.5853	29883	121
605b4607d5323d75966f97a6	vi045542	IIMK	ncov	Human	B.1.1.7	20I (Alpha, V1)	2021-03-16	Europe	Germany	Thuringia		apolda	99510	51.0237	11.5128	29893	7497
609122753e729a26cc55eb94	N0098855	IIMK	ncov	Human	B.1.1.7	20I (Alpha, V1)	2021-04-26	Europe	Germany	Thuringia		neustadt am rennsteig		50.5829	10.9337	29884	189
603e696384693c782d57e81c	AN5048	IIMK	ncov	Human	B.1.1.7	20I (Alpha, V1)	2021-02-23	Europe	Germany	Thuringia		meiningen	98617	50.5678	10.4164	29884	189
6050d93024f3782c72e1efd7	AN5864	IIMK	ncov	Human	B.1.1.7	20I (Alpha, V1)	2021-03-09	Europe	Germany	Thuringia		bad salzungen	36433	50.8117	10.2327	29884	189
6051fb9a2a30c4522feafe86	vi043316	IIMK	ncov	Human	B.1.1.7	20I (Alpha, V1)	2021-03-13	Europe	Germany	Thuringia		camburg	7774	51.0514	11.7055	29884	189
605b4607d5323d75966f97a2	vi044698	IIMK	ncov	Human	B.1.1.7	20I (Alpha, V1)	2021-03-15	Europe	Germany	Thuringia		jena	7743	50.9283	11.5853	29885	3378
60914e148fc9b8496fa6422f	AN9633	IIMK	ncov	Human	B.1.1.7	20I (Alpha, V1)	2021-04-30	Europe	Germany	Thuringia		mühlhausen	99974	51.2088	10.459	29884	4021
605b4607d5323d75966f97b8	vi048146	IIMK	ncov	Human	B.1.1.7	20I (Alpha, V1)	2021-03-19	Europe	Germany	Thuringia		jena	7743	50.9283	11.5853	29884	189
607e97e8df98373a001384b4	AN7985	IIMK	ncov	Human	B.1.1.7	20I (Alpha, V1)	2021-04-14	Europe	Germany	Thuringia		meiningen	98617	50.5678	10.4164	29884	189
60914e148fc9b8496fa64226	AN8548	IIMK	ncov	Human	B.1.1.7	20I (Alpha, V1)	2021-04-21	Europe	Germany	Thuringia		apolda	99510	51.0237	11.5128	29884	189
609270253d108d14e2765715	vi075769	IIMK	ncov	Human	B.1.1.7	20I (Alpha, V1)	2021-04-29	Europe	Germany	Thuringia		jena	7749	50.9283	11.5853	29884	8489
6040b371f7fbde3ec28b5bab	DN0174_19020850	IIMK	ncov	Human	B.1.1.7	20I (Alpha, V1)	2021-02-18	Europe	Germany	Thuringia		dermbach	36466	50.7158	10.1198	29884	189
605b4607d5323d75966f97a0	vi041594	IIMK	ncov	Human	B.1.1.7	20I (Alpha, V1)	2021-03-10	Europe	Germany	Thuringia		weimar	99427	50.9803	11.3272	29884	4527
60643ab46d608a50d2b4ee9a	vi051500	IIMK	ncov	Human	B.1.1.7	20I (Alpha, V1)	2021-03-24	Europe	Germany	Thuringia		jena	7747	50.9283	11.5853	29885	6467
60914e148fc9b8496fa64223	AN8519	IIMK	ncov	Human	B.1.1.7	20I (Alpha, V1)	2021-04-21	Europe	Germany	Thuringia		meiningen	98617	50.5678	10.4164	29884	192
6049de140b6af120b5961408	AN5514	IIMK	ncov	Human	B.1.1.7	20I (Alpha, V1)	2021-03-02	Europe	Germany	Thuringia		bad salzungen	36433	50.8117	10.2327	29884	189
607e97e8df98373a001384ae	AN7916	IIMK	ncov	Human	B.1.1.7	20I (Alpha, V1)	2021-04-13	Europe	Germany	Thuringia		grabfeld	98631	50.4539	10.4404	29884	189
607eb409e72c6f56444770e1	N0087290	IIMK	ncov	Human	B.1.1.7	20I (Alpha, V1)	2021-04-13	Europe	Germany	Thuringia		neustadt am rennsteig		50.5829	10.9337	29884	189
6040b371f7fbde3ec28b5b7e	DN0124_15020383	IIMK	ncov	Human	B.1.1.7	20I (Alpha, V1)	2021-02-15	Europe	Germany	Thuringia		ronneburg	7580	50.8628	12.1813	29884	189
6050d93024f3782c72e1efd2	AN5769	IIMK	ncov	Human	B.1.1.7	20I (Alpha, V1)	2021-03-08	Europe	Germany	Thuringia		meiningen	98617	50.5678	10.4164	29884	189
6080275c0a6df46e05b4716b	vi067206	IIMK	ncov	Human	B.1.1.7	20I (Alpha, V1)	2021-04-19	Europe	Germany	Thuringia		erfurt	99084	50.9775	11.0251	29884	189
6040b371f7fbde3ec28b5ba2	DN0165_20023044	IIMK	ncov	Human	B.1.1.7	20I (Alpha, V1)	2021-02-20	Europe	Germany	Thuringia		greiz	7973	50.6564	12.1996	29884	189
6048a37be05c296fb1eb788d	vi036381	IIMK	ncov	Human	B.1.1.7	20I (Alpha, V1)	2021-03-02	Europe	Germany	Thuringia		bad sulza	99518	51.088	11.6251	29884	2933
6050d93024f3782c72e1efcc	AN5663	IIMK	ncov	Human	B.1.1.7	20I (Alpha, V1)	2021-03-05	Europe	Germany	Thuringia		heiligenstadt	37308	51.378	10.1376	29884	190
607554cd2531781a6b942670	AN7430	IIMK	ncov	Human	B.1.1.7	20I (Alpha, V1)	2021-04-06	Europe	Germany	Thuringia		bad salzungen	36433	50.8117	10.2327	29884	189
6080275c0a6df46e05b4716c	vi062578	IIMK	ncov	Human	B.1.1.7	20I (Alpha, V1)	2021-04-12	Europe	Germany	Thuringia		pößneck	7381	50.695	11.5954	29884	189
6080275c0a6df46e05b47171	vi064335	IIMK	ncov	Human	B.1.1.7	20I (Alpha, V1)	2021-04-14	Europe	Germany	Thuringia		jena	7745	50.9283	11.5853	29884	189
60892a8f887db84d42721d74	vi073152	IIMK	ncov	Human	B.1.1.7	20I (Alpha, V1)	2021-04-26	Europe	Germany	Thuringia		jena	7743	50.9283	11.5853	29884	189
6051fb9a2a30c4522feafe8c	vi043929	IIMK	ncov	Human	B.1.1.7	20I (Alpha, V1)	2021-03-14	Europe	Germany	Thuringia		weimar	99427	50.9803	11.3272	29884	882
605b4607d5323d75966f97c0	vi049309	IIMK	ncov	Human	B.1.1.7	20I (Alpha, V1)	2021-03-22	Europe	Germany	Thuringia		weimar	99423	50.9803	11.3272	29883	189
605b4607d5323d75966f97ae	vi047364	IIMK	ncov	Human	B.1.1.7	20I (Alpha, V1)	2021-03-18	Europe	Germany	Thuringia		jena	7747	50.9283	11.5853	29884	3111
6048a37be05c296fb1eb7898	vi038362	IIMK	ncov	Human	B.1.1.7	20I (Alpha, V1)	2021-03-05	Europe	Germany	Thuringia		jena	7743	50.9283	11.5853	29883	121
6049de140b6af120b59613fc	AN5225	IIMK	ncov	Human	B.1.1.7	20I (Alpha, V1)	2021-02-25	Europe	Germany	Thuringia		meiningen	98617	50.5678	10.4164	29884	189
605b4607d5323d75966f97b0	vi047566	IIMK	ncov	Human	B.1.1.7	20I (Alpha, V1)	2021-03-18	Europe	Germany	Thuringia		jena	7751	50.9283	11.5853	29885	2387
607554cd2531781a6b942671	AN7458	IIMK	ncov	Human	B.1.1.7	20I (Alpha, V1)	2021-04-06	Europe	Germany	Thuringia		apolda	99510	51.0237	11.5128	29884	189
609bc1f42328e94081932bb7	vi079852	IIMK	ncov	Human	B.1.1.7	20I (Alpha, V1)	2021-05-05	Europe	Germany	Thuringia		kahla	7768	50.802	11.5882	29884	189
6048a37be05c296fb1eb7894	vi038333	IIMK	ncov	Human	B.1.1.7	20I (Alpha, V1)	2021-03-05	Europe	Germany	Thuringia		jena	7747	50.9283	11.5853	29884	189
6051fb9a2a30c4522feafe77	vi043314	IIMK	ncov	Human	B.1.1.7	20I (Alpha, V1)	2021-03-13	Europe	Germany	Thuringia		camburg	7774	51.0514	11.7055	29893	4077
605a173197a2743e9aace253	AN6237	IIMK	ncov	Human	B.1.1.7	20I (Alpha, V1)	2021-03-14	Europe	Germany	Thuringia		wutha-farnroda	99848	50.955	10.3905	29884	189
60643ab46d608a50d2b4ee98	vi051412	IIMK	ncov	Human	B.1.1.7	20I (Alpha, V1)	2021-03-24	Europe	Germany	Thuringia		jena	7743	50.9283	11.5853	29884	189
603e138084693c782d57e80e	vi033415	IIMK	ncov	Human	B.1.1.7	20I (Alpha, V1)	2021-02-25	Europe	Germany	Thuringia		jena	7743	50.9283	11.5853	29884	189
6051fb9a2a30c4522feafe89	vi040038	IIMK	ncov	Human	B.1.1.7	20I (Alpha, V1)	2021-03-08	Europe	Germany	Thuringia		jena	7743	50.9283	11.5853	29884	122
605b4607d5323d75966f97ba	vi048229	IIMK	ncov	Human	B.1.1.7	20I (Alpha, V1)	2021-03-20	Europe	Germany	Thuringia		stadtroda	7646	50.86	11.7281	29884	189
607e97e8df98373a001384ad	AN7914	IIMK	ncov	Human	B.1.1.7	20I (Alpha, V1)	2021-04-13	Europe	Germany	Thuringia		meiningen	98617	50.5678	10.4164	29884	189
60881efb48e9a8389a37d199	AN8365	IIMK	ncov	Human	B.1.1.7	20I (Alpha, V1)	2021-04-19	Europe	Germany	Thuringia		bad frankenhausen	6567	51.3557	11.0986	29884	1075
6051fb9a2a30c4522feafe79	vi039923	IIMK	ncov	Human	B.1.1.7	20I (Alpha, V1)	2021-03-08	Europe	Germany	Thuringia		apolda	99510	51.0237	11.5128	29894	5875
605b4607d5323d75966f97b5	vi048097	IIMK	ncov	Human	B.1.1.7	20I (Alpha, V1)	2021-03-19	Europe	Germany	Thuringia		bad salzungen	36433	50.8117	10.2327	29884	190
6065e70e43d414280b1f9e84	N0075059	IIMK	ncov	Human	B.1.1.7	20I (Alpha, V1)	2021-03-29	Europe	Germany	Thuringia		neustadt am rennsteig		50.5829	10.9337	29884	4552
6037afee0f2bec70bc1db30b	vi031801	IIMK	ncov	Human	B.1.1.7	20I (Alpha, V1)	2021-02-23	Europe	Germany	Thuringia		apolda	99510	51.0237	11.5128	29884	341
6051fb9a2a30c4522feafe76	vi039793	IIMK	ncov	Human	B.1.1.7	20I (Alpha, V1)	2021-03-08	Europe	Germany	Thuringia		hermsdorf	7629	50.8961	11.8579	29884	2165
605a173197a2743e9aace256	AN6241	IIMK	ncov	Human	B.1.1.7	20I (Alpha, V1)	2021-03-15	Europe	Germany	Thuringia		eisenach	99817	50.9757	10.3201	29884	189
6049de140b6af120b596140f	AN5747	IIMK	ncov	Human	B.1.1.7	20I (Alpha, V1)	2021-03-05	Europe	Germany	Thuringia		großfahner	99100	51.0558	10.8271	29884	189
6050d93024f3782c72e1efd4	AN5781	IIMK	ncov	Human	B.1.1.7	20I (Alpha, V1)	2021-03-08	Europe	Germany	Thuringia		heiligenstadt	37308	51.378	10.1376	29884	189
606435636d608a50d2b4ee8b	AN6753	IIMK	ncov	Human	B.1.1.7	20I (Alpha, V1)	2021-03-24	Europe	Germany	Thuringia		eisenach	99817	50.9757	10.3201	29884	2597
603537198a2e9463ae5b6f25	AN4579	IIMK	ncov	Human	B.1.1.7	20I (Alpha, V1)	2021-02-18	Europe	Germany	Thuringia		eisenach	99817	50.9757	10.3201	29884	189
6037afee0f2bec70bc1db30d	vi031804	IIMK	ncov	Human	B.1.1.7	20I (Alpha, V1)	2021-02-23	Europe	Germany	Thuringia		apolda	99510	51.0237	11.5128	29884	1929
607554cd2531781a6b942666	AN7082	IIMK	ncov	Human	B.1.1.7	20I (Alpha, V1)	2021-03-29	Europe	Germany	Thuringia		meiningen	98617	50.5678	10.4164	29883	190
607554cd2531781a6b942663	AN6969	IIMK	ncov	Human	B.1.1.7	20I (Alpha, V1)	2021-03-26	Europe	Germany	Thuringia		sondershausen	99706	51.3677	10.8675	29884	1480
607554cd2531781a6b94266b	AN7226	IIMK	ncov	Human	B.1.1.7	20I (Alpha, V1)	2021-03-30	Europe	Germany	Thuringia		gerstungen	99834	50.9638	10.0645	29884	189
6076a81505996601b7a48853	vi058437	IIMK	ncov	Human	B.1.1.7	20I (Alpha, V1)	2021-04-06	Europe	Germany	Thuringia		jena	7743	50.9283	11.5853	29884	192
609a9b0490e5a76fb29bb124	AN9857	IIMK	ncov	Human	B.1.1.7	20I (Alpha, V1)	2021-05-03	Europe	Germany	Thuringia		hildburghausen	98646	50.4271	10.7244	29886	189
60a37c9c292136361c62041a	DN00457_09040999	IIMK	ncov	Human	B.1.1.7	20I (Alpha, V1)	2021-04-08	Europe	Germany	Thuringia		frankenblick	96528	50.3693	11.1468	29872	189
60a37c9c292136361c620435	DN00484_16040582	IIMK	ncov	Human	B.1.1.7	20I (Alpha, V1)	2021-04-15	Europe	Germany	Thuringia		sömmerda	99610	51.1627	11.1157	29881	189
60a37c9d292136361c6204bf	DN00247_28023024	IIMK	ncov	Human	B.1.1.7	20I (Alpha, V1)	2021-02-28	Europe	Germany	Thuringia		greiz	7973	50.6564	12.1996	29884	189
60a37c9c292136361c620412	DN00449_09040892	IIMK	ncov	Human	B.1.1.7	20I (Alpha, V1)	2021-04-08	Europe	Germany	Thuringia		barchfeld	36456	50.8283	11.1816	29884	189
60a37c9d292136361c62048b	DN00195_22020807	IIMK	ncov	Human	B.1.1.7	20I (Alpha, V1)	2021-02-22	Europe	Germany	Thuringia		unterwellenborn	7333	50.6587	11.4361	29884	7286
60a37c9d292136361c6204ad	DN00229_23020830	IIMK	ncov	Human	B.1.1.7	20I (Alpha, V1)	2021-02-22	Europe	Germany	Thuringia		lobenstein	7356	50.4499	11.6393	29883	190
60a37c9d292136361c6204cf	DN00310_10032279	IIMK	ncov	Human	B.1.1.7	20I (Alpha, V1)	2021-03-10	Europe	Germany	Thuringia		lobenstein	7356	50.4499	11.6393	29890	2339
60a37c9c292136361c62041e	DN00461_09040407	IIMK	ncov	Human	B.1.1.7	20I (Alpha, V1)	2021-04-09	Europe	Germany	Thuringia		lobenstein	7356	50.4499	11.6393	29884	190
60a37c9d292136361c6204e6	DN00333_10031348	IIMK	ncov	Human	B.1.1.7	20I (Alpha, V1)	2021-03-10	Europe	Germany	Thuringia		zeulenroda-triebes	7950	50.6489	11.9803	29884	3626
60a37c9d292136361c620503	17032243	IIMK	ncov	Human	B.1.1.7	20I (Alpha, V1)	2021-03-15	Europe	Germany	Thuringia		berga/elster	7980	50.7503	12.1607	29896	5617
60a37c9d292136361c62045a	DN00521_23041312	IIMK	ncov	Human	B.1.1.7	20I (Alpha, V1)	2021-04-23	Europe	Germany	Thuringia		gera	7545	50.8753	12.0788	29884	217
60a37c9d292136361c620461	DN00528_23042023	IIMK	ncov	Human	B.1.1.7	20I (Alpha, V1)	2021-04-23	Europe	Germany	Thuringia		saalfeld	7318	50.6477	11.3596	29884	189
60a37c9d292136361c62049e	DN00214_22020482	IIMK	ncov	Human	B.1.1.7	20I (Alpha, V1)	2021-02-22	Europe	Germany	Thuringia		brahmenau	7554	50.9222	12.16	29884	189
60a37c9c292136361c62044b	DN00506_23041234	IIMK	ncov	Human	B.1.1.7	20I (Alpha, V1)	2021-04-23	Europe	Germany	Thuringia		rudolstadt	7407	50.7193	11.34	29884	189
60a37c9c292136361c62044d	DN00508_23041243	IIMK	ncov	Human	B.1.1.7	20I (Alpha, V1)	2021-04-23	Europe	Germany	Thuringia		saalfeld	7318	50.6477	11.3596	29884	1184
60a37c9d292136361c620464	DN00531_23042026	IIMK	ncov	Human	B.1.1.7	20I (Alpha, V1)	2021-04-23	Europe	Germany	Thuringia		gera	7549	50.8753	12.0788	29884	925
60a37c9d292136361c620465	DN00532_23042027	IIMK	ncov	Human	B.1.1.7	20I (Alpha, V1)	2021-04-23	Europe	Germany	Thuringia		gera	7545	50.8753	12.0788	29884	190
60a37c9d292136361c62049a	DN00210_22020467	IIMK	ncov	Human	B.1.1.7	20I (Alpha, V1)	2021-02-22	Europe	Germany	Thuringia		gera	7546	50.8753	12.0788	29885	1016
609bc1f42328e94081932bb6	vi078987	IIMK	ncov	Human	B.1.1.7	20I (Alpha, V1)	2021-05-04	Europe	Germany	Thuringia		jena	7743	50.9283	11.5853	29884	189
6050d93024f3782c72e1efd1	AN5758	IIMK	ncov	Human	B.1.1.7	20I (Alpha, V1)	2021-03-08	Europe	Germany	Thuringia		eisenach	99817	50.9757	10.3201	29884	189
606435636d608a50d2b4ee8a	AN6683	IIMK	ncov	Human	B.1.1.7	20I (Alpha, V1)	2021-03-23	Europe	Germany	Thuringia		bad salzungen	36433	50.8117	10.2327	29884	189
6076a81505996601b7a4884e	vi061649	IIMK	ncov	Human	B.1.1.7	20I (Alpha, V1)	2021-04-10	Europe	Germany	Thuringia		apolda	99510	51.0237	11.5128	29884	191
60914e148fc9b8496fa64221	AN8437	IIMK	ncov	Human	B.1.1.7	20I (Alpha, V1)	2021-04-20	Europe	Germany	Thuringia		bad salzungen	36433	50.8117	10.2327	29884	189
609bc1f42328e94081932bbb	vi080799	IIMK	ncov	Human	B.1.1.7	20I (Alpha, V1)	2021-05-06	Europe	Germany	Thuringia		jena	7747	50.9283	11.5853	29883	189
6040b371f7fbde3ec28b5bac	DN0175_19020851	IIMK	ncov	Human	B.1.1.7	20I (Alpha, V1)	2021-02-18	Europe	Germany	Thuringia		dermbach	36466	50.7158	10.1198	29884	189
6040b371f7fbde3ec28b5ba5	DN0168_18020812	IIMK	ncov	Human	B.1.1.7	20I (Alpha, V1)	2021-02-17	Europe	Germany	Thuringia		zeulenroda-triebes	7950	50.6489	11.9803	29884	2209
6049de140b6af120b59613fb	AN5218	IIMK	ncov	Human	B.1.1.7	20I (Alpha, V1)	2021-02-25	Europe	Germany	Thuringia		meiningen	98617	50.5678	10.4164	29884	190
6051fb9a2a30c4522feafe8b	vi040040	IIMK	ncov	Human	B.1.1.7	20I (Alpha, V1)	2021-03-08	Europe	Germany	Thuringia		jena	7743	50.9283	11.5853	29883	121
607e97e8df98373a001384b9	AN8039	IIMK	ncov	Human	B.1.1.7	20I (Alpha, V1)	2021-04-13	Europe	Germany	Thuringia		suhl	98527	50.609	10.6907	29884	191
60a37c9c292136361c620433	DN00482_16040571	IIMK	ncov	Human	B.1.1.7	20I (Alpha, V1)	2021-04-15	Europe	Germany	Thuringia		bilzingsleben kannawurf	6578	51.2814	11.068	29869	189
60a37c9d292136361c620459	DN00520_23041292	IIMK	ncov	Human	B.1.1.7	20I (Alpha, V1)	2021-04-23	Europe	Germany	Thuringia		rudolstadt	7407	50.7193	11.34	29884	189
60a37c9d292136361c6204cc	DN00307_10032276	IIMK	ncov	Human	B.1.1.7	20I (Alpha, V1)	2021-03-10	Europe	Germany	Thuringia		zeulenroda-triebes	7937	50.6489	11.9803	29890	1237
60a37c9d292136361c620501	17032241	IIMK	ncov	Human	B.1.1.7	20I (Alpha, V1)	2021-03-15	Europe	Germany	Thuringia		berga/elster	7980	50.7503	12.1607	29888	4157
60a37c9c292136361c62042c	DN00475_16041049	IIMK	ncov	Human	B.1.1.7	20I (Alpha, V1)	2021-04-16	Europe	Germany	Thuringia		mohlsdorf-teichwolframsdorf	7987	50.7204	12.2471	29890	199
60a37c9d292136361c620485	DN00189_22020140	IIMK	ncov	Human	B.1.1.7	20I (Alpha, V1)	2021-02-22	Europe	Germany	Thuringia		greiz	7973	50.6564	12.1996	29893	1106
60a37c9d292136361c6204bc	DN00244_26020430	IIMK	ncov	Human	B.1.1.7	20I (Alpha, V1)	2021-02-26	Europe	Germany	Thuringia		rudolstadt	7407	50.7193	11.34	29884	189
60a37c9c292136361c62040f	DN00446_09040874	IIMK	ncov	Human	B.1.1.7	20I (Alpha, V1)	2021-04-08	Europe	Germany	Thuringia		großschwabhausen	99441	50.9376	11.4894	29884	189
60a37c9c292136361c620440	DN00495_22040680	IIMK	ncov	Human	B.1.1.7	20I (Alpha, V1)	2021-04-21	Europe	Germany	Thuringia		berlstedt	99439	51.0615	11.2452	29884	190
60a37c9d292136361c620499	DN00209_22020260	IIMK	ncov	Human	B.1.1.7	20I (Alpha, V1)	2021-02-22	Europe	Germany	Thuringia		saalfeld	7318	50.6477	11.3596	29884	189
60a37c9d292136361c6204a4	DN00220_22021354	IIMK	ncov	Human	B.1.1.7	20I (Alpha, V1)	2021-02-22	Europe	Germany	Thuringia		saalfeld	7318	50.6477	11.3596	29884	190
60a37c9d292136361c6204bd	DN00245_25020542	IIMK	ncov	Human	B.1.1.7	20I (Alpha, V1)	2021-02-25	Europe	Germany	Thuringia		saalfeld	7318	50.6477	11.3596	29884	189
60a37c9d292136361c62050b	17032251	IIMK	ncov	Human	B.1.1.7	20I (Alpha, V1)	2021-03-15	Europe	Germany	Thuringia		bad salzungen	36433	50.8117	10.2327	29887	2125
60a37c9d292136361c6204b5	DN00237_21020042	IIMK	ncov	Human	B.1.1.7	20I (Alpha, V1)	2021-02-20	Europe	Germany	Thuringia		rudolstadt	7407	50.7193	11.34	29893	4071
60a37c9d292136361c6204ca	DN00305_10032274	IIMK	ncov	Human	B.1.1.7	20I (Alpha, V1)	2021-03-10	Europe	Germany	Thuringia		saalfeld	7318	50.6477	11.3596	29890	2268
60a37c9d292136361c6204df	DN00326_10031340	IIMK	ncov	Human	B.1.1.7	20I (Alpha, V1)	2021-03-10	Europe	Germany	Thuringia		zeulenroda-triebes	7950	50.6489	11.9803	29890	2100
60a37c9d292136361c62050f	17032255	IIMK	ncov	Human	B.1.1.7	20I (Alpha, V1)	2021-03-15	Europe	Germany	Thuringia		geisa	36419	50.7167	9.95024	29885	1360
60a37c9c292136361c620417	DN00454_09040937	IIMK	ncov	Human	B.1.1.7	20I (Alpha, V1)	2021-04-08	Europe	Germany	Thuringia		sonneberg	96515	50.3555	11.169	29884	276
60a37c9d292136361c62046c	DN00539_29040922	IIMK	ncov	Human	B.1.1.7	20I (Alpha, V1)	2021-04-29	Europe	Germany	Thuringia		themar	98660	50.5048	10.6171	29884	190
60a37c9d292136361c62052f	DN00406_26030362	IIMK	ncov	Human	B.1.1.7	20I (Alpha, V1)	2021-03-26	Europe	Germany	Thuringia		bad köstritz	7586	50.9301	12.0118	29884	189
60a37c9c292136361c620419	DN00456_09040988	IIMK	ncov	Human	B.1.1.7	20I (Alpha, V1)	2021-04-08	Europe	Germany	Thuringia		sonneberg	96515	50.3555	11.169	29884	191
60a37c9c292136361c62043b	DN00490_21040072	IIMK	ncov	Human	B.1.1.7	20I (Alpha, V1)	2021-04-19	Europe	Germany	Thuringia		gebesee	99189	51.1158	10.9314	29884	189
60a37c9c292136361c620445	DN00500_23040754	IIMK	ncov	Human	B.1.1.7	20I (Alpha, V1)	2021-04-22	Europe	Germany	Thuringia		gefell	7926	50.4374	11.8611	29884	189
60a37c9c292136361c620448	DN00503_23040767	IIMK	ncov	Human	B.1.1.7	20I (Alpha, V1)	2021-04-23	Europe	Germany	Thuringia		schleiz	7907	50.5774	11.8089	29884	189
60a37c9d292136361c6204ed	DN00340_11031005	IIMK	ncov	Human	B.1.1.7	20I (Alpha, V1)	2021-03-10	Europe	Germany	Thuringia		gera	7549	50.8753	12.0788	29890	1673
603e696384693c782d57e81a	AN5029	IIMK	ncov	Human	B.1.1.7	20I (Alpha, V1)	2021-02-23	Europe	Germany	Thuringia		bad salzungen	36433	50.8117	10.2327	29884	189
6040b371f7fbde3ec28b5ba9	DN0172_18020847	IIMK	ncov	Human	B.1.1.7	20I (Alpha, V1)	2021-02-17	Europe	Germany	Thuringia		meiningen	98617	50.5678	10.4164	29884	189
605a173197a2743e9aace25a	AN6296	IIMK	ncov	Human	B.1.1.7	20I (Alpha, V1)	2021-03-16	Europe	Germany	Thuringia		meiningen	98617	50.5678	10.4164	29884	5987
609a9b0490e5a76fb29bb126	AN9959	IIMK	ncov	Human	B.1.1.7	20I (Alpha, V1)	2021-05-03	Europe	Germany	Thuringia		apolda	99510	51.0237	11.5128	29884	1184
603537198a2e9463ae5b6f26	AN4577	IIMK	ncov	Human	B.1.1.7	20I (Alpha, V1)	2021-02-15	Europe	Germany	Thuringia		neuhaus am rennweg	98724	50.51	11.1387	29884	190
6040b371f7fbde3ec28b5ba7	DN0170_18020822	IIMK	ncov	Human	B.1.1.7	20I (Alpha, V1)	2021-02-18	Europe	Germany	Thuringia		ziegenrück	7924	50.6134	11.65	29884	189
6040b371f7fbde3ec28b5ba8	DN0171_18020824	IIMK	ncov	Human	B.1.1.7	20I (Alpha, V1)	2021-02-18	Europe	Germany	Thuringia		kirschkau	7919	50.6045	11.8876	29884	189
6040b371f7fbde3ec28b5b9c	DN0154_12020169	IIMK	ncov	Human	B.1.1.7	20I (Alpha, V1)	2021-02-12	Europe	Germany	Thuringia		ziegenrück	7924	50.6134	11.65	29884	192
6040b371f7fbde3ec28b5b7f	DN0125_15020322	IIMK	ncov	Human	B.1.1.7	20I (Alpha, V1)	2021-02-15	Europe	Germany	Thuringia		remptendorf	7368	50.5284	11.6598	29884	189
6048a37be05c296fb1eb788b	vi036366	IIMK	ncov	Human	B.1.1.7	20I (Alpha, V1)	2021-03-02	Europe	Germany	Thuringia		bad klosterlausnitz	7639	50.9164	11.868	29883	418
6048a37be05c296fb1eb789c	vi038748	IIMK	ncov	Human	B.1.1.7	20I (Alpha, V1)	2021-03-07	Europe	Germany	Thuringia		saalburg-ebersdorf	7929	50.5022	11.7325	29884	4397
607eb409e72c6f56444770da	N0083095	IIMK	ncov	Human	B.1.1.7	20I (Alpha, V1)	2021-04-08	Europe	Germany	Thuringia		neustadt am rennsteig		50.5829	10.9337	29884	1184
609bc1f42328e94081932bb5	vi078984	IIMK	ncov	Human	B.1.1.7	20I (Alpha, V1)	2021-05-04	Europe	Germany	Thuringia		neuengönna	7778	50.9877	11.6483	29884	189
609bc1f42328e94081932bc1	vi081975	IIMK	ncov	Human	B.1.1.7	20I (Alpha, V1)	2021-05-10	Europe	Germany	Thuringia		greiz	7973	50.6564	12.1996	29884	189
60a37c9d292136361c620492	DN00202_22020878	IIMK	ncov	Human	B.1.1.7	20I (Alpha, V1)	2021-02-22	Europe	Germany	Thuringia		schleiz	7907	50.5774	11.8089	29884	189
60a37c9d292136361c6204ef	DN00342_11030084	IIMK	ncov	Human	B.1.1.7	20I (Alpha, V1)	2021-03-10	Europe	Germany	Thuringia		ronneburg	7580	50.8628	12.1813	29884	1259
60a37c9d292136361c620516	17032262	IIMK	ncov	Human	B.1.1.7	20I (Alpha, V1)	2021-03-15	Europe	Germany	Thuringia		neuhaus am rennweg	98724	50.51	11.1387	29885	1977
60a37c9c292136361c620424	DN00467_16041009	IIMK	ncov	Human	B.1.1.7	20I (Alpha, V1)	2021-04-16	Europe	Germany	Thuringia		greiz	7973	50.6564	12.1996	29884	189
60a37c9d292136361c62045f	DN00526_23042021	IIMK	ncov	Human	B.1.1.7	20I (Alpha, V1)	2021-04-23	Europe	Germany	Thuringia		saalfeld	7318	50.6477	11.3596	29884	189
60a37c9d292136361c6204be	DN00246_26020427	IIMK	ncov	Human	B.1.1.7	20I (Alpha, V1)	2021-02-26	Europe	Germany	Thuringia		saalfeld	7318	50.6477	11.3596	29884	1183
60a37c9c292136361c620441	DN00496_23041108	IIMK	ncov	Human	B.1.1.7	20I (Alpha, V1)	2021-04-23	Europe	Germany	Thuringia		gera	7548	50.8753	12.0788	29893	724
60a37c9d292136361c6204d0	DN00311_10032280	IIMK	ncov	Human	B.1.1.7	20I (Alpha, V1)	2021-03-10	Europe	Germany	Thuringia		remptendorf	7368	50.5284	11.6598	29893	8384
60a37c9d292136361c620532	DN00409_26030859	IIMK	ncov	Human	B.1.1.7	20I (Alpha, V1)	2021-03-26	Europe	Germany	Thuringia		saalburg-ebersdorf	7929	50.5022	11.7325	29884	189
60a37c9c292136361c62041d	DN00460_09040402	IIMK	ncov	Human	B.1.1.7	20I (Alpha, V1)	2021-04-09	Europe	Germany	Thuringia		schleiz	7907	50.5774	11.8089	29884	189
60a37c9d292136361c6204ea	DN00337_10032197	IIMK	ncov	Human	B.1.1.7	20I (Alpha, V1)	2021-03-10	Europe	Germany	Thuringia		saalfeld	7318	50.6477	11.3596	29890	3263
60a37c9c292136361c620420	DN00463_09040123	IIMK	ncov	Human	B.1.1.7	20I (Alpha, V1)	2021-04-09	Europe	Germany	Thuringia		greiz	7973	50.6564	12.1996	29883	189
60a37c9c292136361c620442	DN00497_23041114	IIMK	ncov	Human	B.1.1.7	20I (Alpha, V1)	2021-04-23	Europe	Germany	Thuringia		gera	7548	50.8753	12.0788	29884	189
60a37c9c292136361c620443	DN00498_23041121	IIMK	ncov	Human	B.1.1.7	20I (Alpha, V1)	2021-04-23	Europe	Germany	Thuringia		gera	7545	50.8753	12.0788	29884	209
60a37c9c292136361c62044a	DN00505_23041211	IIMK	ncov	Human	B.1.1.7	20I (Alpha, V1)	2021-04-23	Europe	Germany	Thuringia		saalfeld	7318	50.6477	11.3596	29884	1609
60a37c9d292136361c620518	17032264	IIMK	ncov	Human	B.1.1.7	20I (Alpha, V1)	2021-03-16	Europe	Germany	Thuringia		unterwellenborn	7333	50.6587	11.4361	29884	1344
609122753e729a26cc55eb8c	N0093963	IIMK	ncov	Human	B.1.1.7	20I (Alpha, V1)	2021-04-20	Europe	Germany	Thuringia		neustadt am rennsteig		50.5829	10.9337	29884	3182
609bc1f42328e94081932bbd	vi080802	IIMK	ncov	Human	B.1.1.7	20I (Alpha, V1)	2021-05-06	Europe	Germany	Thuringia		jena	7747	50.9283	11.5853	29884	189
6040b371f7fbde3ec28b5b8f	DN0141_16021223	IIMK	ncov	Human	B.1.1.7	20I (Alpha, V1)	2021-02-16	Europe	Germany	Thuringia		saalfeld	7318	50.6477	11.3596	29884	189
6051fb9a2a30c4522feafe84	vi044511	IIMK	ncov	Human	B.1.1.7	20I (Alpha, V1)	2021-03-15	Europe	Germany	Thuringia		lehnstedt	99441	50.9403	11.4369	29891	4073
6051fb9a2a30c4522feafe7a	vi043115	IIMK	ncov	Human	B.1.1.7	20I (Alpha, V1)	2021-03-12	Europe	Germany	Thuringia		sömmerda	99610	51.1627	11.1157	29884	2381
606435636d608a50d2b4ee83	AN6622	IIMK	ncov	Human	B.1.1.7	20I (Alpha, V1)	2021-03-22	Europe	Germany	Thuringia		eisenach	99817	50.9757	10.3201	29884	189
6065e70e43d414280b1f9e82	N0071895	IIMK	ncov	Human	B.1.1.7	20I (Alpha, V1)	2021-03-25	Europe	Germany	Thuringia		neustadt am rennsteig		50.5829	10.9337	29884	189
6051fb9a2a30c4522feafe7e	vi040087	IIMK	ncov	Human	B.1.1.7	20I (Alpha, V1)	2021-03-08	Europe	Germany	Thuringia		jena	7747	50.9283	11.5853	29885	1016
606435636d608a50d2b4ee80	AN6575	IIMK	ncov	Human	B.1.1.7	20I (Alpha, V1)	2021-03-22	Europe	Germany	Thuringia		heiligenstadt	37308	51.378	10.1376	29884	189
607e97e8df98373a001384aa	AN7830	IIMK	ncov	Human	B.1.1.7	20I (Alpha, V1)	2021-04-12	Europe	Germany	Thuringia		heiligenstadt	37308	51.378	10.1376	29884	189
60a37c9c292136361c62041c	DN00459_09040344	IIMK	ncov	Human	B.1.1.7	20I (Alpha, V1)	2021-04-09	Europe	Germany	Thuringia		saalfeld	7318	50.6477	11.3596	29884	189
60a37c9d292136361c620450	DN00511_23040944	IIMK	ncov	Human	B.1.1.7	20I (Alpha, V1)	2021-04-23	Europe	Germany	Thuringia		saalfeld	7318	50.6477	11.3596	29884	1183
60a37c9d292136361c620455	DN00516_23040451	IIMK	ncov	Human	B.1.1.7	20I (Alpha, V1)	2021-04-23	Europe	Germany	Thuringia		gera	7548	50.8753	12.0788	29883	193
60a37c9d292136361c62045e	DN00525_23042007	IIMK	ncov	Human	B.1.1.7	20I (Alpha, V1)	2021-04-23	Europe	Germany	Thuringia		weida	7570	50.7735	12.0614	29884	189
60a37c9d292136361c6204cd	DN00308_10032277	IIMK	ncov	Human	B.1.1.7	20I (Alpha, V1)	2021-03-10	Europe	Germany	Thuringia		zeulenroda-triebes	7937	50.6489	11.9803	29890	6219
60a37c9c292136361c620415	DN00452_09040900	IIMK	ncov	Human	B.1.1.7	20I (Alpha, V1)	2021-04-08	Europe	Germany	Thuringia		bad salzungen	36433	50.8117	10.2327	29884	189
60a37c9d292136361c6204b1	DN00233_24021050	IIMK	ncov	Human	B.1.1.7	20I (Alpha, V1)	2021-02-24	Europe	Germany	Thuringia		berga/elster	7980	50.7503	12.1607	29881	7005
60a37c9d292136361c620505	17032245	IIMK	ncov	Human	B.1.1.7	20I (Alpha, V1)	2021-03-15	Europe	Germany	Thuringia		berga/elster	7980	50.7503	12.1607	29895	5659
60a37c9d292136361c620524	DN00395_26030865	IIMK	ncov	Human	B.1.1.7	20I (Alpha, V1)	2021-03-26	Europe	Germany	Thuringia		lobenstein	7356	50.4499	11.6393	29884	189
60a37c9c292136361c62043e	DN00493_23040829	IIMK	ncov	Human	B.1.1.7	20I (Alpha, V1)	2021-04-23	Europe	Germany	Thuringia		schleiz	7907	50.5774	11.8089	29884	190
60a37c9d292136361c6204d1	DN00312_10032281	IIMK	ncov	Human	B.1.1.7	20I (Alpha, V1)	2021-03-10	Europe	Germany	Thuringia		rosenthal am rennsteig	7366	50.4181	11.684	29890	2667
60a37c9d292136361c62049d	DN00213_22020478	IIMK	ncov	Human	B.1.1.7	20I (Alpha, V1)	2021-02-22	Europe	Germany	Thuringia		gera	7548	50.8753	12.0788	29885	1016
60a37c9d292136361c620527	DN00398_26030168	IIMK	ncov	Human	B.1.1.7	20I (Alpha, V1)	2021-03-26	Europe	Germany	Thuringia		berga/elster	7980	50.7503	12.1607	29884	189
60a37c9d292136361c62045c	DN00523_23042002	IIMK	ncov	Human	B.1.1.7	20I (Alpha, V1)	2021-04-23	Europe	Germany	Thuringia		gera	7546	50.8753	12.0788	29884	189
60a37c9d292136361c6204b4	DN00236_23021425	IIMK	ncov	Human	B.1.1.7	20I (Alpha, V1)	2021-02-23	Europe	Germany	Thuringia		rudolstadt	7407	50.7193	11.34	29884	189
60a37c9d292136361c6204e1	DN00328_10031342	IIMK	ncov	Human	B.1.1.7	20I (Alpha, V1)	2021-03-10	Europe	Germany	Thuringia		zeulenroda-triebes	7937	50.6489	11.9803	29890	4153
60a37c9d292136361c6204e9	DN00336_10031367	IIMK	ncov	Human	B.1.1.7	20I (Alpha, V1)	2021-03-10	Europe	Germany	Thuringia		zeulenroda-triebes	7950	50.6489	11.9803	29884	884
60a37c9d292136361c620508	17032248	IIMK	ncov	Human	B.1.1.7	20I (Alpha, V1)	2021-03-15	Europe	Germany	Thuringia		vacha	36404	50.8256	10.0231	29893	2178
6166ba5b81e18c1c41ceccee	1050191562	IIMK	ncov	Human	B.1.1.7	20I (Alpha, V1)	2021-03-31	Europe	Germany	Thuringia		gera	7548	50.8753	12.0788	29884	203
6166ba5b81e18c1c41ceccf0	1050191681	IIMK	ncov	Human	B.1.1.7	20I (Alpha, V1)	2021-04-01	Europe	Germany	Thuringia		weida	7570	50.7735	12.0614	29880	469
6166ba5b81e18c1c41ceccf4	1091311923	IIMK	ncov	Human	B.1.1.7	20I (Alpha, V1)	2021-03-30	Europe	Germany	Thuringia		arnstadt	99310	50.8343	10.9456	29884	265
6166ba5b81e18c1c41ceccf5	1091312019	IIMK	ncov	Human	B.1.1.7	20I (Alpha, V1)	2021-03-30	Europe	Germany	Thuringia		arnstadt	99310	50.8343	10.9456	29884	58
6166ba5b81e18c1c41ceccf9	1091313002	IIMK	ncov	Human	B.1.1.7	20I (Alpha, V1)	2021-03-30	Europe	Germany	Thuringia		mühlhausen	99974	51.2088	10.459	29884	180
6166ba5b81e18c1c41ceccfb	1091313020	IIMK	ncov	Human	B.1.1.7	20I (Alpha, V1)	2021-03-30	Europe	Germany	Thuringia		mühlhausen	99974	51.2088	10.459	29868	464
6166ba5b81e18c1c41ceccff	1091313104	IIMK	ncov	Human	B.1.1.7	20I (Alpha, V1)	2021-03-31	Europe	Germany	Thuringia		arnstadt	99310	50.8343	10.9456	29884	1425
6166ba5b81e18c1c41cecd00	1091313125	IIMK	ncov	Human	B.1.1.7	20I (Alpha, V1)	2021-03-31	Europe	Germany	Thuringia		arnstadt	99310	50.8343	10.9456	29884	905
6166ba5b81e18c1c41cecd0f	1091313461	IIMK	ncov	Human	B.1.1.7	20I (Alpha, V1)	2021-03-31	Europe	Germany	Thuringia		gera	7548	50.8753	12.0788	29884	23
6166ba5b81e18c1c41cecd11	1091314294	IIMK	ncov	Human	B.1.1.7	20I (Alpha, V1)	2021-03-31	Europe	Germany	Thuringia		arnstadt	99310	50.8343	10.9456	29884	58
6166ba5b81e18c1c41cecd14	1091314411	IIMK	ncov	Human	B.1.1.7	20I (Alpha, V1)	2021-03-31	Europe	Germany	Thuringia		arnstadt	99310	50.8343	10.9456	29884	177
6166ba5b81e18c1c41cecd21	1091314686	IIMK	ncov	Human	B.1.1.7	20I (Alpha, V1)	2021-04-01	Europe	Germany	Thuringia		vogtei	99986	51.14	10.3993	29884	167
6166ba5b81e18c1c41cecd25	1091314711	IIMK	ncov	Human	B.1.1.7	20I (Alpha, V1)	2021-03-31	Europe	Germany	Thuringia		heiligenstadt	37308	51.378	10.1376	29884	4
6166ba5b81e18c1c41cecd2c	1091315624	IIMK	ncov	Human	B.1.1.7	20I (Alpha, V1)	2021-04-02	Europe	Germany	Thuringia		arnstadt	99310	50.8343	10.9456	29884	56
6166ba5b81e18c1c41cecd31	1091315789	IIMK	ncov	Human	B.1.1.7	20I (Alpha, V1)	2021-04-01	Europe	Germany	Thuringia		arnstadt	99310	50.8343	10.9456	29884	50
6166ba5b81e18c1c41cecd37	1091315837	IIMK	ncov	Human	B.1.1.7	20I (Alpha, V1)	2021-04-01	Europe	Germany	Thuringia		weimar	99423	50.9803	11.3272	29884	39
6166ba5b81e18c1c41cecd3b	1091315901	IIMK	ncov	Human	B.1.1.7	20I (Alpha, V1)	2021-04-01	Europe	Germany	Thuringia		bad langensalza	99947	51.1089	10.6475	29884	15
6166ba5b81e18c1c41cecd43	1024471088	IIMK	ncov	Human	B.1.1.7	20I (Alpha, V1)	2021-04-03	Europe	Germany	Thuringia		bad salzungen	36433	50.8117	10.2327	29871	23
6166ba5b81e18c1c41cecd46	1024586436	IIMK	ncov	Human	B.1.1.7	20I (Alpha, V1)	2021-03-30	Europe	Germany	Thuringia		worbis	37339	51.4188	10.3625	29880	875
6166ba5b81e18c1c41cecd48	1024586532	IIMK	ncov	Human	B.1.1.7	20I (Alpha, V1)	2021-03-31	Europe	Germany	Thuringia		küllstedt	37359	51.2758	10.2804	29884	423
6166ba5b81e18c1c41cecd4d	1024625274	IIMK	ncov	Human	B.1.1.7	20I (Alpha, V1)	2021-04-02	Europe	Germany	Thuringia		waltershausen	99880	50.8998	10.5563	29884	92
6166ba5b81e18c1c41cecd53	1024625311	IIMK	ncov	Human	B.1.1.7	20I (Alpha, V1)	2021-04-02	Europe	Germany	Thuringia		dreigleichen	99869	50.8916	10.8103	29884	91
6166ba5b81e18c1c41cecd56	1024625317	IIMK	ncov	Human	B.1.1.7	20I (Alpha, V1)	2021-04-02	Europe	Germany	Thuringia		friedrichroda	99894	50.8575	10.5651	29884	373
6166ba5b81e18c1c41cecd58	1024625320	IIMK	ncov	Human	B.1.1.7	20I (Alpha, V1)	2021-04-02	Europe	Germany	Thuringia		nesse-apfelstädt	99192	50.921	10.9039	29884	199
6166ba5b81e18c1c41cecd5c	1024625332	IIMK	ncov	Human	B.1.1.7	20I (Alpha, V1)	2021-04-02	Europe	Germany	Thuringia		nesse-apfelstädt	99192	50.921	10.9039	29863	703
6166ba5b81e18c1c41cecd62	1024625347	IIMK	ncov	Human	B.1.1.7	20I (Alpha, V1)	2021-04-02	Europe	Germany	Thuringia		gotha	99867	50.9461	10.6962	29884	487
6166ba5b81e18c1c41cecd65	1024625352	IIMK	ncov	Human	B.1.1.7	20I (Alpha, V1)	2021-04-02	Europe	Germany	Thuringia		waltershausen	99880	50.8998	10.5563	29884	680
6166ba5b81e18c1c41cecd6b	1027540661	IIMK	ncov	Human	B.1.1.7	20I (Alpha, V1)	2021-03-31	Europe	Germany	Thuringia		schkölen	7619	51.0417	11.8214	29884	84
6166ba5b81e18c1c41cecd6e	1027540696	IIMK	ncov	Human	B.1.1.7	20I (Alpha, V1)	2021-04-01	Europe	Germany	Thuringia		crossen	7613	50.9646	11.984	29884	734
6166ba5b81e18c1c41cecd71	1027540711	IIMK	ncov	Human	B.1.1.7	20I (Alpha, V1)	2021-04-01	Europe	Germany	Thuringia		schkölen	7619	51.0417	11.8214	29884	1118
6166ba5b81e18c1c41cecd79	1050193056	IIMK	ncov	Human	B.1.1.7	20I (Alpha, V1)	2021-04-02	Europe	Germany	Thuringia		gera	7549	50.8753	12.0788	29884	130
6166ba5b81e18c1c41cecd7e	1050193178	IIMK	ncov	Human	B.1.1.7	20I (Alpha, V1)	2021-04-02	Europe	Germany	Thuringia		brahmenau	7554	50.9222	12.16	29884	920
6166ba5b81e18c1c41cecd80	1050193467	IIMK	ncov	Human	B.1.1.7	20I (Alpha, V1)	2021-04-02	Europe	Germany	Thuringia		gera	7549	50.8753	12.0788	29884	548
6166ba5b81e18c1c41cecd83	1091314683	IIMK	ncov	Human	B.1.1.7	20I (Alpha, V1)	2021-04-01	Europe	Germany	Thuringia		mühlhausen	99974	51.2088	10.459	29884	182
6166ba5b81e18c1c41cecd91	1091316075	IIMK	ncov	Human	B.1.1.7	20I (Alpha, V1)	2021-04-02	Europe	Germany	Thuringia		weimar	99423	50.9803	11.3272	29884	85
6166ba5b81e18c1c41cecd92	1091316100	IIMK	ncov	Human	B.1.1.7	20I (Alpha, V1)	2021-04-03	Europe	Germany	Thuringia		arnstadt	99310	50.8343	10.9456	29884	59
6166ba5b81e18c1c41cecd93	1091316112	IIMK	ncov	Human	B.1.1.7	20I (Alpha, V1)	2021-04-03	Europe	Germany	Thuringia		arnstadt	99310	50.8343	10.9456	29884	51
6166ba5b81e18c1c41cecd97	1091316162	IIMK	ncov	Human	B.1.1.7	20I (Alpha, V1)	2021-04-03	Europe	Germany	Thuringia		arnstadt	99310	50.8343	10.9456	29884	62
6166ba5b81e18c1c41cecd98	1091316164	IIMK	ncov	Human	B.1.1.7	20I (Alpha, V1)	2021-04-03	Europe	Germany	Thuringia		arnstadt	99310	50.8343	10.9456	29884	29
6166ba5b81e18c1c41cecd9b	1091316184	IIMK	ncov	Human	B.1.1.7	20I (Alpha, V1)	2021-04-03	Europe	Germany	Thuringia		arnstadt	99310	50.8343	10.9456	29884	44
6166ba5b81e18c1c41cecd9e	1091316314	IIMK	ncov	Human	B.1.1.7	20I (Alpha, V1)	2021-04-03	Europe	Germany	Thuringia		arnstadt	99310	50.8343	10.9456	29884	58
6166ba5b81e18c1c41cecd9f	1091316328	IIMK	ncov	Human	B.1.1.7	20I (Alpha, V1)	2021-04-03	Europe	Germany	Thuringia		arnstadt	99310	50.8343	10.9456	29884	982
6166ba5b81e18c1c41cecda0	1091316329	IIMK	ncov	Human	B.1.1.7	20I (Alpha, V1)	2021-04-03	Europe	Germany	Thuringia		arnstadt	99310	50.8343	10.9456	29884	63
6166ba5b81e18c1c41cecda4	1091316347	IIMK	ncov	Human	B.1.1.7	20I (Alpha, V1)	2021-04-03	Europe	Germany	Thuringia		arnstadt	99310	50.8343	10.9456	29884	33
6166ba5b81e18c1c41cecda5	1091316362	IIMK	ncov	Human	B.1.1.7	20I (Alpha, V1)	2021-04-03	Europe	Germany	Thuringia		arnstadt	99310	50.8343	10.9456	29884	60
6166ba5b81e18c1c41cecdaf	1024586700	IIMK	ncov	Human	B.1.1.7	20I (Alpha, V1)	2021-04-03	Europe	Germany	Thuringia		heiligenstadt	37308	51.378	10.1376	29884	82
6166ba5b81e18c1c41cecdb1	1024586719	IIMK	ncov	Human	B.1.1.7	20I (Alpha, V1)	2021-04-05	Europe	Germany	Thuringia		leinefelde	37327	51.3887	10.3268	29884	500
6166ba5b81e18c1c41cecdb3	1024586733	IIMK	ncov	Human	B.1.1.7	20I (Alpha, V1)	2021-04-05	Europe	Germany	Thuringia		leinefelde	37327	51.3887	10.3268	29884	709
6166ba5b81e18c1c41cecdb7	1024586771	IIMK	ncov	Human	B.1.1.7	20I (Alpha, V1)	2021-04-05	Europe	Germany	Thuringia		heiligenstadt	37308	51.378	10.1376	29884	399
6166ba5b81e18c1c41cecdb9	1024586776	IIMK	ncov	Human	B.1.1.7	20I (Alpha, V1)	2021-04-05	Europe	Germany	Thuringia		heiligenstadt	37308	51.378	10.1376	29884	586
6166ba5b81e18c1c41cecdbb	1024625315	IIMK	ncov	Human	B.1.1.7	20I (Alpha, V1)	2021-04-02	Europe	Germany	Thuringia		friedrichroda	99894	50.8575	10.5651	29884	854
6166ba5b81e18c1c41ceccf7	1091312775	IIMK	ncov	Human	B.1.1.7	20I (Alpha, V1)	2021-03-30	Europe	Germany	Thuringia		gera	7548	50.8753	12.0788	29884	970
6166ba5b81e18c1c41ceccfc	1091313023	IIMK	ncov	Human	B.1.1.7	20I (Alpha, V1)	2021-03-30	Europe	Germany	Thuringia		mühlhausen	99974	51.2088	10.459	29884	96
6166ba5b81e18c1c41ceccfd	1091313027	IIMK	ncov	Human	B.1.1.7	20I (Alpha, V1)	2021-03-30	Europe	Germany	Thuringia		gotha	99867	50.9461	10.6962	29875	68
6166ba5b81e18c1c41cecd02	1091313140	IIMK	ncov	Human	B.1.1.7	20I (Alpha, V1)	2021-03-31	Europe	Germany	Thuringia		arnstadt	99310	50.8343	10.9456	29884	125
6166ba5b81e18c1c41cecd05	1091313247	IIMK	ncov	Human	B.1.1.7	20I (Alpha, V1)	2021-03-31	Europe	Germany	Thuringia		arnstadt	99310	50.8343	10.9456	29884	147
6166ba5b81e18c1c41cecd0d	1091313364	IIMK	ncov	Human	B.1.1.7	20I (Alpha, V1)	2021-03-31	Europe	Germany	Thuringia		arnstadt	99310	50.8343	10.9456	29884	688
6166ba5b81e18c1c41cecd12	1091314318	IIMK	ncov	Human	B.1.1.7	20I (Alpha, V1)	2021-03-31	Europe	Germany	Thuringia		arnstadt	99310	50.8343	10.9456	29884	48
6166ba5b81e18c1c41cecd17	1091314520	IIMK	ncov	Human	B.1.1.7	20I (Alpha, V1)	2021-03-31	Europe	Germany	Thuringia		arnstadt	99310	50.8343	10.9456	29884	89
6166ba5b81e18c1c41cecd18	1091314525	IIMK	ncov	Human	B.1.1.7	20I (Alpha, V1)	2021-03-31	Europe	Germany	Thuringia		arnstadt	99310	50.8343	10.9456	29877	51
6166ba5b81e18c1c41cecd1a	1091314538	IIMK	ncov	Human	B.1.1.7	20I (Alpha, V1)	2021-03-31	Europe	Germany	Thuringia		arnstadt	99310	50.8343	10.9456	29884	77
6166ba5b81e18c1c41cecd1b	1091314546	IIMK	ncov	Human	B.1.1.7	20I (Alpha, V1)	2021-03-31	Europe	Germany	Thuringia		arnstadt	99310	50.8343	10.9456	29884	32
6166ba5b81e18c1c41cecd1c	1091314552	IIMK	ncov	Human	B.1.1.7	20I (Alpha, V1)	2021-03-31	Europe	Germany	Thuringia		arnstadt	99310	50.8343	10.9456	29884	80
6166ba5b81e18c1c41cecd26	1091314777	IIMK	ncov	Human	B.1.1.7	20I (Alpha, V1)	2021-04-01	Europe	Germany	Thuringia		weimar	99423	50.9803	11.3272	29880	51
6166ba5b81e18c1c41cecd29	1091315568	IIMK	ncov	Human	B.1.1.7	20I (Alpha, V1)	2021-04-02	Europe	Germany	Thuringia		arnstadt	99310	50.8343	10.9456	29884	65
6166ba5b81e18c1c41cecd2b	1091315599	IIMK	ncov	Human	B.1.1.7	20I (Alpha, V1)	2021-04-01	Europe	Germany	Thuringia		arnstadt	99310	50.8343	10.9456	29884	78
6166ba5b81e18c1c41cecd2d	1091315630	IIMK	ncov	Human	B.1.1.7	20I (Alpha, V1)	2021-04-02	Europe	Germany	Thuringia		arnstadt	99310	50.8343	10.9456	29884	21
6166ba5b81e18c1c41cecd2e	1091315632	IIMK	ncov	Human	B.1.1.7	20I (Alpha, V1)	2021-04-02	Europe	Germany	Thuringia		arnstadt	99310	50.8343	10.9456	29884	22
6166ba5b81e18c1c41cecd2f	1091315741	IIMK	ncov	Human	B.1.1.7	20I (Alpha, V1)	2021-04-01	Europe	Germany	Thuringia		weimar	99423	50.9803	11.3272	29884	12
6166ba5b81e18c1c41cecd32	1091315800	IIMK	ncov	Human	B.1.1.7	20I (Alpha, V1)	2021-04-01	Europe	Germany	Thuringia		arnstadt	99310	50.8343	10.9456	29884	61
6166ba5b81e18c1c41cecd34	1091315809	IIMK	ncov	Human	B.1.1.7	20I (Alpha, V1)	2021-04-01	Europe	Germany	Thuringia		worbis	37339	51.4188	10.3625	29884	13
6166ba5b81e18c1c41cecd36	1091315832	IIMK	ncov	Human	B.1.1.7	20I (Alpha, V1)	2021-04-01	Europe	Germany	Thuringia		heiligenstadt	37308	51.378	10.1376	29884	61
6166ba5b81e18c1c41cecd38	1091315880	IIMK	ncov	Human	B.1.1.7	20I (Alpha, V1)	2021-04-01	Europe	Germany	Thuringia		mühlhausen	99974	51.2088	10.459	29884	33
6166ba5b81e18c1c41cecd40	1024465006	IIMK	ncov	Human	B.1.1.7	20I (Alpha, V1)	2021-04-02	Europe	Germany	Thuringia		weimar	99423	50.9803	11.3272	29884	50
6166ba5b81e18c1c41cecd41	1024471084	IIMK	ncov	Human	B.1.1.7	20I (Alpha, V1)	2021-04-03	Europe	Germany	Thuringia		bad salzungen	36433	50.8117	10.2327	29884	268
6166ba5b81e18c1c41cecd44	1024550689	IIMK	ncov	Human	B.1.1.7	20I (Alpha, V1)	2021-04-01	Europe	Germany	Thuringia		weißensee	99631	51.1985	11.0665	29884	647
6166ba5b81e18c1c41cecd47	1024586528	IIMK	ncov	Human	B.1.1.7	20I (Alpha, V1)	2021-03-31	Europe	Germany	Thuringia		heiligenstadt	37308	51.378	10.1376	29880	648
6166ba5b81e18c1c41cecd49	1024586550	IIMK	ncov	Human	B.1.1.7	20I (Alpha, V1)	2021-03-31	Europe	Germany	Thuringia		heiligenstadt	37308	51.378	10.1376	29884	68
6166ba5b81e18c1c41cecd4e	1024625276	IIMK	ncov	Human	B.1.1.7	20I (Alpha, V1)	2021-04-02	Europe	Germany	Thuringia		dreigleichen	99869	50.8916	10.8103	29877	711
6166ba5b81e18c1c41cecd51	1024625300	IIMK	ncov	Human	B.1.1.7	20I (Alpha, V1)	2021-04-02	Europe	Germany	Thuringia		ohrdruf	99885	50.8288	10.7341	29884	393
6166ba5b81e18c1c41cecd59	1024625321	IIMK	ncov	Human	B.1.1.7	20I (Alpha, V1)	2021-04-02	Europe	Germany	Thuringia		waltershausen	99880	50.8998	10.5563	29884	688
6166ba5b81e18c1c41cecd5a	1024625324	IIMK	ncov	Human	B.1.1.7	20I (Alpha, V1)	2021-04-02	Europe	Germany	Thuringia		waltershausen	99880	50.8998	10.5563	29884	511
6166ba5b81e18c1c41cecd66	1024625353	IIMK	ncov	Human	B.1.1.7	20I (Alpha, V1)	2021-04-02	Europe	Germany	Thuringia		gotha	99867	50.9461	10.6962	29884	125
6166ba5b81e18c1c41cecd6d	1027540694	IIMK	ncov	Human	B.1.1.7	20I (Alpha, V1)	2021-04-01	Europe	Germany	Thuringia		eisenberg	7607	50.9689	11.8964	29880	1064
6166ba5b81e18c1c41cecd70	1027540698	IIMK	ncov	Human	B.1.1.7	20I (Alpha, V1)	2021-04-01	Europe	Germany	Thuringia		crossen	7613	50.9646	11.984	29880	797
6166ba5b81e18c1c41cecd72	1027540713	IIMK	ncov	Human	B.1.1.7	20I (Alpha, V1)	2021-04-01	Europe	Germany	Thuringia		schkölen	7619	51.0417	11.8214	29884	932
6166ba5b81e18c1c41cecd74	1027790035	IIMK	ncov	Human	B.1.1.7	20I (Alpha, V1)	2021-04-02	Europe	Germany	Thuringia		eisenberg	7602	50.9689	11.8964	29884	672
6166ba5b81e18c1c41cecd76	1050191449	IIMK	ncov	Human	B.1.1.7	20I (Alpha, V1)	2021-03-31	Europe	Germany	Thuringia		weida	7570	50.7735	12.0614	29884	192
6166ba5b81e18c1c41cecd7a	1050193057	IIMK	ncov	Human	B.1.1.7	20I (Alpha, V1)	2021-04-02	Europe	Germany	Thuringia		ronneburg	7580	50.8628	12.1813	29884	837
6166ba5b81e18c1c41cecd7b	1050193159	IIMK	ncov	Human	B.1.1.7	20I (Alpha, V1)	2021-04-02	Europe	Germany	Thuringia		gera	7548	50.8753	12.0788	29884	672
6166ba5b81e18c1c41cecd85	1091315575	IIMK	ncov	Human	B.1.1.7	20I (Alpha, V1)	2021-04-02	Europe	Germany	Thuringia		arnstadt	99310	50.8343	10.9456	29884	825
6166ba5b81e18c1c41cecd87	1091315760	IIMK	ncov	Human	B.1.1.7	20I (Alpha, V1)	2021-04-01	Europe	Germany	Thuringia		weimar	99423	50.9803	11.3272	29884	1231
6166ba5b81e18c1c41cecd88	1091315795	IIMK	ncov	Human	B.1.1.7	20I (Alpha, V1)	2021-04-01	Europe	Germany	Thuringia		arnstadt	99310	50.8343	10.9456	29884	762
6166ba5b81e18c1c41cecd8b	1091315873	IIMK	ncov	Human	B.1.1.7	20I (Alpha, V1)	2021-04-02	Europe	Germany	Thuringia		gotha	99867	50.9461	10.6962	29884	539
6166ba5b81e18c1c41cecd8d	1091315935	IIMK	ncov	Human	B.1.1.7	20I (Alpha, V1)	2021-04-02	Europe	Germany	Thuringia		jena	7747	50.9283	11.5853	29884	235
6166ba5b81e18c1c41cecd8f	1091315941	IIMK	ncov	Human	B.1.1.7	20I (Alpha, V1)	2021-04-02	Europe	Germany	Thuringia		kahla	7768	50.802	11.5882	29884	452
6166ba5b81e18c1c41cecd90	1091316073	IIMK	ncov	Human	B.1.1.7	20I (Alpha, V1)	2021-04-02	Europe	Germany	Thuringia		weimar	99423	50.9803	11.3272	29884	111
6166ba5b81e18c1c41cecda2	1091316333	IIMK	ncov	Human	B.1.1.7	20I (Alpha, V1)	2021-04-03	Europe	Germany	Thuringia		arnstadt	99310	50.8343	10.9456	29884	57
6166ba5b81e18c1c41cecda3	1091316335	IIMK	ncov	Human	B.1.1.7	20I (Alpha, V1)	2021-04-03	Europe	Germany	Thuringia		arnstadt	99310	50.8343	10.9456	29884	50
6166ba5b81e18c1c41cecdac	1024586645	IIMK	ncov	Human	B.1.1.7	20I (Alpha, V1)	2021-04-03	Europe	Germany	Thuringia		leinefelde	37327	51.3887	10.3268	29884	681
6166ba5b81e18c1c41cecdb2	1024586726	IIMK	ncov	Human	B.1.1.7	20I (Alpha, V1)	2021-04-05	Europe	Germany	Thuringia		niederorschel	37355	51.3722	10.4237	29884	707
6166ba5b81e18c1c41cecdb4	1024586740	IIMK	ncov	Human	B.1.1.7	20I (Alpha, V1)	2021-04-05	Europe	Germany	Thuringia		dingelstädt	37351	51.3156	10.3215	29884	760
6166ba5b81e18c1c41cecdb6	1024586766	IIMK	ncov	Human	B.1.1.7	20I (Alpha, V1)	2021-04-05	Europe	Germany	Thuringia		leinefelde	37327	51.3887	10.3268	29884	730
6166ba5b81e18c1c41cecdb8	1024586775	IIMK	ncov	Human	B.1.1.7	20I (Alpha, V1)	2021-04-05	Europe	Germany	Thuringia		heiligenstadt	37308	51.378	10.1376	29884	531
6166ba5b81e18c1c41cecdbc	1024625329	IIMK	ncov	Human	B.1.1.7	20I (Alpha, V1)	2021-04-02	Europe	Germany	Thuringia		dreigleichen	99869	50.8916	10.8103	29884	640
6166ba5b81e18c1c41cecdbe	1027540765	IIMK	ncov	Human	B.1.1.7	20I (Alpha, V1)	2021-04-05	Europe	Germany	Thuringia		hermsdorf	7629	50.8961	11.8579	29884	1041
6166ba5b81e18c1c41cecce9	1028301458	IIMK	ncov	Human	B.1.1.7	20I (Alpha, V1)	2021-03-31	Europe	Germany	Thuringia		sondershausen	99706	51.3677	10.8675	29884	8
6166ba5b81e18c1c41ceccea	1028840006	IIMK	ncov	Human	B.1.1.7	20I (Alpha, V1)	2021-04-01	Europe	Germany	Thuringia		sondershausen	99706	51.3677	10.8675	29884	16
6166ba5b81e18c1c41ceccef	1050191634	IIMK	ncov	Human	B.1.1.7	20I (Alpha, V1)	2021-03-31	Europe	Germany	Thuringia		gera	7545	50.8753	12.0788	29884	243
6166ba5b81e18c1c41ceccf1	1050191684	IIMK	ncov	Human	B.1.1.7	20I (Alpha, V1)	2021-04-01	Europe	Germany	Thuringia		gera	7546	50.8753	12.0788	29884	33
6166ba5b81e18c1c41cecd01	1091313127	IIMK	ncov	Human	B.1.1.7	20I (Alpha, V1)	2021-03-31	Europe	Germany	Thuringia		arnstadt	99310	50.8343	10.9456	29884	1009
6166ba5b81e18c1c41cecd04	1091313242	IIMK	ncov	Human	B.1.1.7	20I (Alpha, V1)	2021-03-31	Europe	Germany	Thuringia		arnstadt	99310	50.8343	10.9456	29884	245
6166ba5b81e18c1c41cecd07	1091313297	IIMK	ncov	Human	B.1.1.7	20I (Alpha, V1)	2021-03-31	Europe	Germany	Thuringia		arnstadt	99310	50.8343	10.9456	29884	1176
6166ba5b81e18c1c41cecd09	1091313307	IIMK	ncov	Human	B.1.1.7	20I (Alpha, V1)	2021-03-31	Europe	Germany	Thuringia		arnstadt	99310	50.8343	10.9456	29884	69
6166ba5b81e18c1c41cecd0a	1091313308	IIMK	ncov	Human	B.1.1.7	20I (Alpha, V1)	2021-03-31	Europe	Germany	Thuringia		arnstadt	99310	50.8343	10.9456	29884	84
6166ba5b81e18c1c41cecd0b	1091313323	IIMK	ncov	Human	B.1.1.7	20I (Alpha, V1)	2021-03-31	Europe	Germany	Thuringia		arnstadt	99310	50.8343	10.9456	29884	73
6166ba5b81e18c1c41cecd0c	1091313351	IIMK	ncov	Human	B.1.1.7	20I (Alpha, V1)	2021-03-31	Europe	Germany	Thuringia		weimar	99423	50.9803	11.3272	29884	261
6166ba5b81e18c1c41cecd0e	1091313365	IIMK	ncov	Human	B.1.1.7	20I (Alpha, V1)	2021-03-31	Europe	Germany	Thuringia		arnstadt	99310	50.8343	10.9456	29884	440
6166ba5b81e18c1c41cecd13	1091314402	IIMK	ncov	Human	B.1.1.7	20I (Alpha, V1)	2021-03-31	Europe	Germany	Thuringia		arnstadt	99310	50.8343	10.9456	29884	25
6166ba5b81e18c1c41cecd19	1091314535	IIMK	ncov	Human	B.1.1.7	20I (Alpha, V1)	2021-03-31	Europe	Germany	Thuringia		arnstadt	99310	50.8343	10.9456	29884	63
6166ba5b81e18c1c41cecd1d	1091314580	IIMK	ncov	Human	B.1.1.7	20I (Alpha, V1)	2021-03-31	Europe	Germany	Thuringia		arnstadt	99310	50.8343	10.9456	29884	139
6166ba5b81e18c1c41cecd1e	1091314581	IIMK	ncov	Human	B.1.1.7	20I (Alpha, V1)	2021-03-31	Europe	Germany	Thuringia		arnstadt	99310	50.8343	10.9456	29884	38
6166ba5b81e18c1c41cecd20	1091314682	IIMK	ncov	Human	B.1.1.7	20I (Alpha, V1)	2021-04-01	Europe	Germany	Thuringia		vogtei	99986	51.14	10.3993	29884	235
6166ba5b81e18c1c41cecd2a	1091315585	IIMK	ncov	Human	B.1.1.7	20I (Alpha, V1)	2021-04-02	Europe	Germany	Thuringia		arnstadt	99310	50.8343	10.9456	29884	56
6166ba5b81e18c1c41cecd30	1091315743	IIMK	ncov	Human	B.1.1.7	20I (Alpha, V1)	2021-04-01	Europe	Germany	Thuringia		weimar	99423	50.9803	11.3272	29884	10
6166ba5b81e18c1c41cecd33	1091315803	IIMK	ncov	Human	B.1.1.7	20I (Alpha, V1)	2021-04-01	Europe	Germany	Thuringia		arnstadt	99310	50.8343	10.9456	29884	54
6166ba5b81e18c1c41cecd35	1091315823	IIMK	ncov	Human	B.1.1.7	20I (Alpha, V1)	2021-04-01	Europe	Germany	Thuringia		arnstadt	99310	50.8343	10.9456	29884	57
6166ba5b81e18c1c41cecd39	1091315887	IIMK	ncov	Human	B.1.1.7	20I (Alpha, V1)	2021-04-01	Europe	Germany	Thuringia		mühlhausen	99974	51.2088	10.459	29884	73
6166ba5b81e18c1c41cecd3d	1002047340	IIMK	ncov	Human	B.1.1.7	20I (Alpha, V1)	2021-04-01	Europe	Germany	Thuringia		zeulenroda-triebes	7937	50.6489	11.9803	29884	692
6166ba5b81e18c1c41cecd45	1024550690	IIMK	ncov	Human	B.1.1.7	20I (Alpha, V1)	2021-04-01	Europe	Germany	Thuringia		großrudestedt	99195	51.092	11.1	29884	575
6166ba5b81e18c1c41cecd50	1024625288	IIMK	ncov	Human	B.1.1.7	20I (Alpha, V1)	2021-04-02	Europe	Germany	Thuringia		georgenthal/thür.wald	99887	50.8321	10.6627	29880	262
6166ba5b81e18c1c41cecd57	1024625318	IIMK	ncov	Human	B.1.1.7	20I (Alpha, V1)	2021-04-02	Europe	Germany	Thuringia		waltershausen	99880	50.8998	10.5563	29893	759
6166ba5b81e18c1c41cecd5b	1024625330	IIMK	ncov	Human	B.1.1.7	20I (Alpha, V1)	2021-04-02	Europe	Germany	Thuringia		dreigleichen	99869	50.8916	10.8103	29884	232
6166ba5b81e18c1c41cecd5e	1024625336	IIMK	ncov	Human	B.1.1.7	20I (Alpha, V1)	2021-04-02	Europe	Germany	Thuringia		nesse-apfelstädt	99192	50.921	10.9039	29884	312
6166ba5b81e18c1c41cecd5f	1024625337	IIMK	ncov	Human	B.1.1.7	20I (Alpha, V1)	2021-04-02	Europe	Germany	Thuringia		nesse-apfelstädt	99192	50.921	10.9039	29884	273
6166ba5b81e18c1c41cecd64	1024625349	IIMK	ncov	Human	B.1.1.7	20I (Alpha, V1)	2021-04-02	Europe	Germany	Thuringia		ohrdruf	99885	50.8288	10.7341	29884	83
6166ba5b81e18c1c41cecd67	1024625354	IIMK	ncov	Human	B.1.1.7	20I (Alpha, V1)	2021-04-02	Europe	Germany	Thuringia		gotha	99867	50.9461	10.6962	29884	196
6166ba5b81e18c1c41cecd6a	1027540657	IIMK	ncov	Human	B.1.1.7	20I (Alpha, V1)	2021-03-31	Europe	Germany	Thuringia		kahla	7768	50.802	11.5882	29884	239
6166ba5b81e18c1c41cecd7c	1050193161	IIMK	ncov	Human	B.1.1.7	20I (Alpha, V1)	2021-04-02	Europe	Germany	Thuringia		gera	7548	50.8753	12.0788	29884	818
6166ba5b81e18c1c41cecd81	1050193533	IIMK	ncov	Human	B.1.1.7	20I (Alpha, V1)	2021-04-02	Europe	Germany	Thuringia		gera	7545	50.8753	12.0788	29884	492
6166ba5b81e18c1c41cecd86	1091315611	IIMK	ncov	Human	B.1.1.7	20I (Alpha, V1)	2021-04-02	Europe	Germany	Thuringia		arnstadt	99310	50.8343	10.9456	29884	504
6166ba5b81e18c1c41cecd89	1091315815	IIMK	ncov	Human	B.1.1.7	20I (Alpha, V1)	2021-04-01	Europe	Germany	Thuringia		arnstadt	99310	50.8343	10.9456	29884	750
6166ba5b81e18c1c41cecd95	1091316155	IIMK	ncov	Human	B.1.1.7	20I (Alpha, V1)	2021-04-03	Europe	Germany	Thuringia		arnstadt	99310	50.8343	10.9456	29884	20
6166ba5b81e18c1c41cecd99	1091316170	IIMK	ncov	Human	B.1.1.7	20I (Alpha, V1)	2021-04-03	Europe	Germany	Thuringia		arnstadt	99310	50.8343	10.9456	29884	74
6166ba5b81e18c1c41cecd9c	1091316209	IIMK	ncov	Human	B.1.1.7	20I (Alpha, V1)	2021-04-03	Europe	Germany	Thuringia		arnstadt	99310	50.8343	10.9456	29884	67
6166ba5b81e18c1c41cecda6	1091316393	IIMK	ncov	Human	B.1.1.7	20I (Alpha, V1)	2021-04-03	Europe	Germany	Thuringia		arnstadt	99310	50.8343	10.9456	29880	218
6166ba5b81e18c1c41cecda7	1091316402	IIMK	ncov	Human	B.1.1.7	20I (Alpha, V1)	2021-04-03	Europe	Germany	Thuringia		arnstadt	99310	50.8343	10.9456	29884	35
6166ba5b81e18c1c41cecda9	1024586562	IIMK	ncov	Human	B.1.1.7	20I (Alpha, V1)	2021-03-31	Europe	Germany	Thuringia		arenshausen	37318	51.3624	10.0721	29880	857
6166ba5b81e18c1c41cecdab	1024586638	IIMK	ncov	Human	B.1.1.7	20I (Alpha, V1)	2021-04-03	Europe	Germany	Thuringia		leinefelde	37327	51.3887	10.3268	29884	744
6166ba5b81e18c1c41cecdad	1024586646	IIMK	ncov	Human	B.1.1.7	20I (Alpha, V1)	2021-04-03	Europe	Germany	Thuringia		leinefelde	37327	51.3887	10.3268	29884	297
6166ba5b81e18c1c41cecdb0	1024586715	IIMK	ncov	Human	B.1.1.7	20I (Alpha, V1)	2021-04-05	Europe	Germany	Thuringia		arenshausen	37318	51.3624	10.0721	29884	451
6166ba5b81e18c1c41ceccec	1050191306	IIMK	ncov	Human	B.1.1.7	20I (Alpha, V1)	2021-03-31	Europe	Germany	Thuringia		langenwetzendorf	7957	50.6799	12.095	29884	272
6166ba5b81e18c1c41ceccf2	1050192741	IIMK	ncov	Human	B.1.1.7	20I (Alpha, V1)	2021-04-01	Europe	Germany	Thuringia		auma-weidatal	7955	50.6952	11.9065	29884	59
6166ba5b81e18c1c41ceccf3	1060905652	IIMK	ncov	Human	B.1.1.7	20I (Alpha, V1)	2021-03-31	Europe	Germany	Thuringia		gera	7549	50.8753	12.0788	29884	68
6166ba5b81e18c1c41ceccf6	1091312057	IIMK	ncov	Human	B.1.1.7	20I (Alpha, V1)	2021-03-30	Europe	Germany	Thuringia		weimar	99423	50.9803	11.3272	29884	493
6166ba5b81e18c1c41ceccf8	1091312996	IIMK	ncov	Human	B.1.1.7	20I (Alpha, V1)	2021-03-30	Europe	Germany	Thuringia		rodeberg	99976	51.2479	10.3519	29884	729
6166ba5b81e18c1c41ceccfa	1091313018	IIMK	ncov	Human	B.1.1.7	20I (Alpha, V1)	2021-03-30	Europe	Germany	Thuringia		mühlhausen	99974	51.2088	10.459	29868	62
6166ba5b81e18c1c41ceccfe	1091313040	IIMK	ncov	Human	B.1.1.7	20I (Alpha, V1)	2021-03-31	Europe	Germany	Thuringia		arnstadt	99310	50.8343	10.9456	29884	247
6166ba5b81e18c1c41cecd03	1091313240	IIMK	ncov	Human	B.1.1.7	20I (Alpha, V1)	2021-03-31	Europe	Germany	Thuringia		arnstadt	99310	50.8343	10.9456	29880	736
6166ba5b81e18c1c41cecd06	1091313288	IIMK	ncov	Human	B.1.1.7	20I (Alpha, V1)	2021-03-31	Europe	Germany	Thuringia		arnstadt	99310	50.8343	10.9456	29884	59
6166ba5b81e18c1c41cecd08	1091313299	IIMK	ncov	Human	B.1.1.7	20I (Alpha, V1)	2021-03-31	Europe	Germany	Thuringia		arnstadt	99310	50.8343	10.9456	29884	64
6166ba5b81e18c1c41cecd10	1091314292	IIMK	ncov	Human	B.1.1.7	20I (Alpha, V1)	2021-03-31	Europe	Germany	Thuringia		arnstadt	99310	50.8343	10.9456	29884	19
6166ba5b81e18c1c41cecd15	1091314414	IIMK	ncov	Human	B.1.1.7	20I (Alpha, V1)	2021-03-31	Europe	Germany	Thuringia		arnstadt	99310	50.8343	10.9456	29884	84
6166ba5b81e18c1c41cecd16	1091314438	IIMK	ncov	Human	B.1.1.7	20I (Alpha, V1)	2021-03-31	Europe	Germany	Thuringia		arnstadt	99310	50.8343	10.9456	29884	27
6166ba5b81e18c1c41cecd1f	1091314601	IIMK	ncov	Human	B.1.1.7	20I (Alpha, V1)	2021-03-31	Europe	Germany	Thuringia		arnstadt	99310	50.8343	10.9456	29884	88
6166ba5b81e18c1c41cecd22	1091314695	IIMK	ncov	Human	B.1.1.7	20I (Alpha, V1)	2021-04-01	Europe	Germany	Thuringia		vogtei	99986	51.14	10.3993	29884	323
6166ba5b81e18c1c41cecd23	1091314696	IIMK	ncov	Human	B.1.1.7	20I (Alpha, V1)	2021-04-01	Europe	Germany	Thuringia		mühlhausen	99974	51.2088	10.459	29884	36
6166ba5b81e18c1c41cecd24	1091314699	IIMK	ncov	Human	B.1.1.7	20I (Alpha, V1)	2021-04-01	Europe	Germany	Thuringia		mühlhausen	99974	51.2088	10.459	29884	769
6166ba5b81e18c1c41cecd27	1091314780	IIMK	ncov	Human	B.1.1.7	20I (Alpha, V1)	2021-04-01	Europe	Germany	Thuringia		weimar	99423	50.9803	11.3272	29884	121
6166ba5b81e18c1c41cecd28	1091315530	IIMK	ncov	Human	B.1.1.7	20I (Alpha, V1)	2021-04-01	Europe	Germany	Thuringia		gera	7551	50.8753	12.0788	29789	56
6166ba5b81e18c1c41cecd3a	1091315900	IIMK	ncov	Human	B.1.1.7	20I (Alpha, V1)	2021-04-01	Europe	Germany	Thuringia		mühlhausen	99974	51.2088	10.459	29884	80
6166ba5b81e18c1c41cecd3e	1004352025	IIMK	ncov	Human	B.1.1.7	20I (Alpha, V1)	2021-03-31	Europe	Germany	Thuringia		gera	7552	50.8753	12.0788	29884	84
6166ba5b81e18c1c41cecd42	1024471085	IIMK	ncov	Human	B.1.1.7	20I (Alpha, V1)	2021-04-03	Europe	Germany	Thuringia		bad salzungen	36433	50.8117	10.2327	29884	247
6166ba5b81e18c1c41cecd4a	1024586559	IIMK	ncov	Human	B.1.1.7	20I (Alpha, V1)	2021-03-31	Europe	Germany	Thuringia		niederorschel	37355	51.3722	10.4237	29884	422
6166ba5b81e18c1c41cecd4b	1024586602	IIMK	ncov	Human	B.1.1.7	20I (Alpha, V1)	2021-04-01	Europe	Germany	Thuringia		dingelstädt	37351	51.3156	10.3215	29884	1180
6166ba5b81e18c1c41cecd4c	1024587012	IIMK	ncov	Human	B.1.1.7	20I (Alpha, V1)	2021-03-31	Europe	Germany	Thuringia		worbis	37339	51.4188	10.3625	29884	134
6166ba5b81e18c1c41cecd4f	1024625277	IIMK	ncov	Human	B.1.1.7	20I (Alpha, V1)	2021-04-02	Europe	Germany	Thuringia		waltershausen	99880	50.8998	10.5563	29884	245
6166ba5b81e18c1c41cecd52	1024625308	IIMK	ncov	Human	B.1.1.7	20I (Alpha, V1)	2021-04-02	Europe	Germany	Thuringia		gotha	99867	50.9461	10.6962	29884	567
6166ba5b81e18c1c41cecd54	1024625312	IIMK	ncov	Human	B.1.1.7	20I (Alpha, V1)	2021-04-02	Europe	Germany	Thuringia		tambach-dietharz	99897	50.7925	10.6157	29884	633
6166ba5b81e18c1c41cecd55	1024625314	IIMK	ncov	Human	B.1.1.7	20I (Alpha, V1)	2021-04-02	Europe	Germany	Thuringia		dreigleichen	99869	50.8916	10.8103	29884	540
6166ba5b81e18c1c41cecd5d	1024625334	IIMK	ncov	Human	B.1.1.7	20I (Alpha, V1)	2021-04-02	Europe	Germany	Thuringia		ohrdruf	99885	50.8288	10.7341	29883	623
6166ba5b81e18c1c41cecd60	1024625344	IIMK	ncov	Human	B.1.1.7	20I (Alpha, V1)	2021-04-02	Europe	Germany	Thuringia		tambach-dietharz	99897	50.7925	10.6157	29886	90
6166ba5b81e18c1c41cecd63	1024625348	IIMK	ncov	Human	B.1.1.7	20I (Alpha, V1)	2021-04-02	Europe	Germany	Thuringia		gotha	99867	50.9461	10.6962	29884	499
6166ba5b81e18c1c41cecd68	1024625356	IIMK	ncov	Human	B.1.1.7	20I (Alpha, V1)	2021-04-02	Europe	Germany	Thuringia		ohrdruf	99885	50.8288	10.7341	29884	1008
6166ba5b81e18c1c41cecd69	1024625357	IIMK	ncov	Human	B.1.1.7	20I (Alpha, V1)	2021-04-02	Europe	Germany	Thuringia		gotha	99867	50.9461	10.6962	29884	137
6166ba5b81e18c1c41cecd6c	1027540674	IIMK	ncov	Human	B.1.1.7	20I (Alpha, V1)	2021-03-31	Europe	Germany	Thuringia		bürgel	7616	50.9422	11.7571	29884	95
6166ba5b81e18c1c41cecd6f	1027540697	IIMK	ncov	Human	B.1.1.7	20I (Alpha, V1)	2021-04-01	Europe	Germany	Thuringia		crossen	7613	50.9646	11.984	29884	563
6166ba5b81e18c1c41cecd73	1027540726	IIMK	ncov	Human	B.1.1.7	20I (Alpha, V1)	2021-04-01	Europe	Germany	Thuringia		crossen	7613	50.9646	11.984	29884	1055
6166ba5b81e18c1c41cecd75	1028301383	IIMK	ncov	Human	B.1.1.7	20I (Alpha, V1)	2021-03-30	Europe	Germany	Thuringia		ebeleben	99713	51.2847	10.7319	29884	247
6166ba5b81e18c1c41cecd77	1050192354	IIMK	ncov	Human	B.1.1.7	20I (Alpha, V1)	2021-04-01	Europe	Germany	Thuringia		zeulenroda-triebes	7937	50.6489	11.9803	29884	341
6166ba5b81e18c1c41cecd7d	1050193173	IIMK	ncov	Human	B.1.1.7	20I (Alpha, V1)	2021-04-02	Europe	Germany	Thuringia		brahmenau	7554	50.9222	12.16	29884	628
6166ba5b81e18c1c41cecd7f	1050193394	IIMK	ncov	Human	B.1.1.7	20I (Alpha, V1)	2021-04-02	Europe	Germany	Thuringia		gera	7545	50.8753	12.0788	29884	443
6166ba5b81e18c1c41cecd84	1091314693	IIMK	ncov	Human	B.1.1.7	20I (Alpha, V1)	2021-04-01	Europe	Germany	Thuringia		mühlhausen	99974	51.2088	10.459	29884	109
6166ba5b81e18c1c41cecd8a	1091315868	IIMK	ncov	Human	B.1.1.7	20I (Alpha, V1)	2021-04-01	Europe	Germany	Thuringia		weimar	99423	50.9803	11.3272	29884	363
6166ba5b81e18c1c41cecd8c	1091315893	IIMK	ncov	Human	B.1.1.7	20I (Alpha, V1)	2021-04-01	Europe	Germany	Thuringia		körner	99998	51.1917	10525	29884	466
6166ba5b81e18c1c41cecd8e	1091315937	IIMK	ncov	Human	B.1.1.7	20I (Alpha, V1)	2021-04-02	Europe	Germany	Thuringia		jena	7745	50.9283	11.5853	29880	621
6166ba5b81e18c1c41cecd94	1091316121	IIMK	ncov	Human	B.1.1.7	20I (Alpha, V1)	2021-04-03	Europe	Germany	Thuringia		arnstadt	99310	50.8343	10.9456	29877	27
6166ba5b81e18c1c41cecd96	1091316160	IIMK	ncov	Human	B.1.1.7	20I (Alpha, V1)	2021-04-03	Europe	Germany	Thuringia		arnstadt	99310	50.8343	10.9456	29884	278
6166ba5b81e18c1c41cecd9a	1091316183	IIMK	ncov	Human	B.1.1.7	20I (Alpha, V1)	2021-04-03	Europe	Germany	Thuringia		arnstadt	99310	50.8343	10.9456	29877	34
6166ba5b81e18c1c41cecd9d	1091316226	IIMK	ncov	Human	B.1.1.7	20I (Alpha, V1)	2021-04-03	Europe	Germany	Thuringia		arnstadt	99310	50.8343	10.9456	29884	36
6166ba5b81e18c1c41cecda1	1091316331	IIMK	ncov	Human	B.1.1.7	20I (Alpha, V1)	2021-04-03	Europe	Germany	Thuringia		arnstadt	99310	50.8343	10.9456	29884	53
6166ba5b81e18c1c41cecda8	1024471079	IIMK	ncov	Human	B.1.1.7	20I (Alpha, V1)	2021-04-03	Europe	Germany	Thuringia		bad salzungen	36433	50.8117	10.2327	29884	51
6166ba5b81e18c1c41cecdaa	1024586632	IIMK	ncov	Human	B.1.1.7	20I (Alpha, V1)	2021-04-03	Europe	Germany	Thuringia		heiligenstadt	37308	51.378	10.1376	29884	462
6166ba5b81e18c1c41cecdae	1024586671	IIMK	ncov	Human	B.1.1.7	20I (Alpha, V1)	2021-04-03	Europe	Germany	Thuringia		heiligenstadt	37308	51.378	10.1376	29884	29
6166ba5b81e18c1c41cecdb5	1024586763	IIMK	ncov	Human	B.1.1.7	20I (Alpha, V1)	2021-04-05	Europe	Germany	Thuringia		heiligenstadt	37308	51.378	10.1376	29880	832
6166ba5b81e18c1c41cecdba	1024586777	IIMK	ncov	Human	B.1.1.7	20I (Alpha, V1)	2021-04-05	Europe	Germany	Thuringia		niederorschel	37355	51.3722	10.4237	29884	531
6166ba5b81e18c1c41cecdbd	1024625350	IIMK	ncov	Human	B.1.1.7	20I (Alpha, V1)	2021-04-02	Europe	Germany	Thuringia		waltershausen	99880	50.8998	10.5563	29884	315
6166ba5b81e18c1c41cecdc2	1027540770	IIMK	ncov	Human	B.1.1.7	20I (Alpha, V1)	2021-04-04	Europe	Germany	Thuringia		stadtroda	7646	50.86	11.7281	29884	56
6166ba5b81e18c1c41cecdc3	1027540771	IIMK	ncov	Human	B.1.1.7	20I (Alpha, V1)	2021-04-04	Europe	Germany	Thuringia		stadtroda	7646	50.86	11.7281	29884	672
6166ba5b81e18c1c41cecdc5	1027540776	IIMK	ncov	Human	B.1.1.7	20I (Alpha, V1)	2021-04-04	Europe	Germany	Thuringia		stadtroda	7646	50.86	11.7281	29884	194
6166ba5b81e18c1c41cecdc8	1028090081	IIMK	ncov	Human	B.1.1.7	20I (Alpha, V1)	2021-04-05	Europe	Germany	Thuringia		jena	7743	50.9283	11.5853	29884	557
6166ba5b81e18c1c41cecdc9	1028090082	IIMK	ncov	Human	B.1.1.7	20I (Alpha, V1)	2021-04-05	Europe	Germany	Thuringia		jena	7743	50.9283	11.5853	29884	146
6166ba5b81e18c1c41cecdcb	1028090512	IIMK	ncov	Human	B.1.1.7	20I (Alpha, V1)	2021-04-03	Europe	Germany	Thuringia		jena	7743	50.9283	11.5853	29884	48
6166ba5b81e18c1c41cecdd0	1028090519	IIMK	ncov	Human	B.1.1.7	20I (Alpha, V1)	2021-04-03	Europe	Germany	Thuringia		jena	7743	50.9283	11.5853	29880	239
6166ba5b81e18c1c41cecdd2	1050192427	IIMK	ncov	Human	B.1.1.7	20I (Alpha, V1)	2021-04-01	Europe	Germany	Thuringia		gera	7548	50.8753	12.0788	29884	243
6166ba5b81e18c1c41cecdd9	1050194119	IIMK	ncov	Human	B.1.1.7	20I (Alpha, V1)	2021-04-03	Europe	Germany	Thuringia		gera	7545	50.8753	12.0788	29884	26
6166ba5b81e18c1c41cecdde	1050194447	IIMK	ncov	Human	B.1.1.7	20I (Alpha, V1)	2021-04-04	Europe	Germany	Thuringia		gera	7548	50.8753	12.0788	29880	436
6166ba5b81e18c1c41cecde5	1091314717	IIMK	ncov	Human	B.1.1.7	20I (Alpha, V1)	2021-03-31	Europe	Germany	Thuringia		jena	7743	50.9283	11.5853	29884	47
6166ba5b81e18c1c41cecde6	1091316011	IIMK	ncov	Human	B.1.1.7	20I (Alpha, V1)	2021-04-02	Europe	Germany	Thuringia		jena	7747	50.9283	11.5853	29884	123
6166ba5b81e18c1c41cecdea	1091316110	IIMK	ncov	Human	B.1.1.7	20I (Alpha, V1)	2021-04-03	Europe	Germany	Thuringia		arnstadt	99310	50.8343	10.9456	29877	162
6166ba5b81e18c1c41cecdeb	1091316119	IIMK	ncov	Human	B.1.1.7	20I (Alpha, V1)	2021-04-03	Europe	Germany	Thuringia		arnstadt	99310	50.8343	10.9456	29884	55
6166ba5b81e18c1c41cecdec	1091316127	IIMK	ncov	Human	B.1.1.7	20I (Alpha, V1)	2021-04-03	Europe	Germany	Thuringia		arnstadt	99310	50.8343	10.9456	29884	57
6166ba5b81e18c1c41cecdee	1091316154	IIMK	ncov	Human	B.1.1.7	20I (Alpha, V1)	2021-04-03	Europe	Germany	Thuringia		arnstadt	99310	50.8343	10.9456	29884	731
6166ba5b81e18c1c41cecdfa	1091316842	IIMK	ncov	Human	B.1.1.7	20I (Alpha, V1)	2021-04-03	Europe	Germany	Thuringia		arnstadt	99310	50.8343	10.9456	29884	47
6166ba5b81e18c1c41cece03	1091316947	IIMK	ncov	Human	B.1.1.7	20I (Alpha, V1)	2021-04-03	Europe	Germany	Thuringia		weimar	99423	50.9803	11.3272	29884	51
6166ba5b81e18c1c41cece05	1091317031	IIMK	ncov	Human	B.1.1.7	20I (Alpha, V1)	2021-04-04	Europe	Germany	Thuringia		apolda	99510	51.0237	11.5128	29884	62
6166ba5b81e18c1c41cece06	1091317032	IIMK	ncov	Human	B.1.1.7	20I (Alpha, V1)	2021-04-04	Europe	Germany	Thuringia		apolda	99510	51.0237	11.5128	29884	76
6166ba5b81e18c1c41cece0a	1091317216	IIMK	ncov	Human	B.1.1.7	20I (Alpha, V1)	2021-04-04	Europe	Germany	Thuringia		arnstadt	99310	50.8343	10.9456	29884	498
6166ba5b81e18c1c41cece10	1091317268	IIMK	ncov	Human	B.1.1.7	20I (Alpha, V1)	2021-04-04	Europe	Germany	Thuringia		arnstadt	99310	50.8343	10.9456	29884	490
6166ba5b81e18c1c41cece12	1091317271	IIMK	ncov	Human	B.1.1.7	20I (Alpha, V1)	2021-04-04	Europe	Germany	Thuringia		arnstadt	99310	50.8343	10.9456	29884	39
6166ba5b81e18c1c41cece15	1091317491	IIMK	ncov	Human	B.1.1.7	20I (Alpha, V1)	2021-04-05	Europe	Germany	Thuringia		kahla	7768	50.802	11.5882	29884	320
6166ba5b81e18c1c41cece18	1091317580	IIMK	ncov	Human	B.1.1.7	20I (Alpha, V1)	2021-04-05	Europe	Germany	Thuringia		arnstadt	99310	50.8343	10.9456	29884	610
6166ba5b81e18c1c41cece19	1091317609	IIMK	ncov	Human	B.1.1.7	20I (Alpha, V1)	2021-04-05	Europe	Germany	Thuringia		arnstadt	99310	50.8343	10.9456	29884	932
6166ba5b81e18c1c41cece1d	1091317737	IIMK	ncov	Human	B.1.1.7	20I (Alpha, V1)	2021-04-05	Europe	Germany	Thuringia		weimar	99423	50.9803	11.3272	29884	697
6166ba5b81e18c1c41cece1e	1091317738	IIMK	ncov	Human	B.1.1.7	20I (Alpha, V1)	2021-04-05	Europe	Germany	Thuringia		weimar	99423	50.9803	11.3272	29884	536
6166ba5b81e18c1c41cece21	1024471083	IIMK	ncov	Human	B.1.1.7	20I (Alpha, V1)	2021-04-03	Europe	Germany	Thuringia		bad salzungen	36433	50.8117	10.2327	29875	638
6166ba5b81e18c1c41cece27	1025082631	IIMK	ncov	Human	B.1.1.7	20I (Alpha, V1)	2021-04-07	Europe	Germany	Thuringia		eisenberg	7607	50.9689	11.8964	29884	273
6166ba5b81e18c1c41cece2d	1027790042	IIMK	ncov	Human	B.1.1.7	20I (Alpha, V1)	2021-04-06	Europe	Germany	Thuringia		stadtroda	7646	50.86	11.7281	29884	41
6166ba5b81e18c1c41cece32	1050195071	IIMK	ncov	Human	B.1.1.7	20I (Alpha, V1)	2021-04-05	Europe	Germany	Thuringia		gera	7546	50.8753	12.0788	29884	500
6166ba5b81e18c1c41cece37	1050195648	IIMK	ncov	Human	B.1.1.7	20I (Alpha, V1)	2021-04-06	Europe	Germany	Thuringia		weida	7570	50.7735	12.0614	29884	368
6166ba5b81e18c1c41cece39	1050196055	IIMK	ncov	Human	B.1.1.7	20I (Alpha, V1)	2021-04-06	Europe	Germany	Thuringia		gera	7546	50.8753	12.0788	29883	639
6166ba5b81e18c1c41cece3a	1050196079	IIMK	ncov	Human	B.1.1.7	20I (Alpha, V1)	2021-04-06	Europe	Germany	Thuringia		berga/elster	7980	50.7503	12.1607	29884	137
6166ba5b81e18c1c41cece3e	1091316811	IIMK	ncov	Human	B.1.1.7	20I (Alpha, V1)	2021-04-03	Europe	Germany	Thuringia		jena	7751	50.9283	11.5853	29884	1285
6166ba5b81e18c1c41cece4a	1091318992	IIMK	ncov	Human	B.1.1.7	20I (Alpha, V1)	2021-04-07	Europe	Germany	Thuringia		erfurt	99087	50.9775	11.0251	29884	47
6166ba5b81e18c1c41cece57	5002302042	IIMK	ncov	Human	B.1.1.7	20I (Alpha, V1)	2021-04-08	Europe	Germany	Thuringia		gera	7546	50.8753	12.0788	29884	1176
6166ba5b81e18c1c41cece58	5002302044	IIMK	ncov	Human	B.1.1.7	20I (Alpha, V1)	2021-04-08	Europe	Germany	Thuringia		gera	7548	50.8753	12.0788	29884	705
6166ba5b81e18c1c41cece5c	5002346192	IIMK	ncov	Human	B.1.1.7	20I (Alpha, V1)	2021-04-08	Europe	Germany	Thuringia		altenburg	4600	50.9851	12.4332	29884	678
6166ba5b81e18c1c41cece62	5002417954	IIMK	ncov	Human	B.1.1.7	20I (Alpha, V1)	2021-04-08	Europe	Germany	Thuringia		berga/elster	7980	50.7503	12.1607	29884	417
6166ba5b81e18c1c41cece65	5002427739	IIMK	ncov	Human	B.1.1.7	20I (Alpha, V1)	2021-04-08	Europe	Germany	Thuringia		altenburg	4600	50.9851	12.4332	29880	711
6166ba5b81e18c1c41cece66	5002459639	IIMK	ncov	Human	B.1.1.7	20I (Alpha, V1)	2021-04-08	Europe	Germany	Thuringia		tanna	7922	50.4931	11.8611	29880	671
6166ba5b81e18c1c41cece69	5002477054	IIMK	ncov	Human	B.1.1.7	20I (Alpha, V1)	2021-04-09	Europe	Germany	Thuringia		neustadt an der orla	7806	50.7367	11.7444	29884	357
6166ba5b81e18c1c41cece6d	1004352033	IIMK	ncov	Human	B.1.1.7	20I (Alpha, V1)	2021-04-06	Europe	Germany	Thuringia		gera	7545	50.8753	12.0788	29884	55
6166ba5b81e18c1c41cece71	1024083244	IIMK	ncov	Human	B.1.1.7	20I (Alpha, V1)	2021-04-07	Europe	Germany	Thuringia		ebeleben	99713	51.2847	10.7319	29884	327
6166ba5b81e18c1c41cece73	1024083623	IIMK	ncov	Human	B.1.1.7	20I (Alpha, V1)	2021-04-07	Europe	Germany	Thuringia		artern/unstrut	6556	51.3626	11.2951	29884	977
6166ba5b81e18c1c41cece74	1024465502	IIMK	ncov	Human	B.1.1.7	20I (Alpha, V1)	2021-04-06	Europe	Germany	Thuringia		weimar	99423	50.9803	11.3272	29884	76
6166ba5b81e18c1c41cece75	1024471092	IIMK	ncov	Human	B.1.1.7	20I (Alpha, V1)	2021-04-07	Europe	Germany	Thuringia		bad salzungen	36433	50.8117	10.2327	29884	63
6166ba5b81e18c1c41cece76	1024471093	IIMK	ncov	Human	B.1.1.7	20I (Alpha, V1)	2021-04-07	Europe	Germany	Thuringia		bad salzungen	36433	50.8117	10.2327	29884	78
6166ba5b81e18c1c41cece7a	1024471099	IIMK	ncov	Human	B.1.1.7	20I (Alpha, V1)	2021-04-07	Europe	Germany	Thuringia		unterbreizbach	36414	50.8172	9.97833	29884	74
6166ba5b81e18c1c41cece7b	1024471101	IIMK	ncov	Human	B.1.1.7	20I (Alpha, V1)	2021-04-07	Europe	Germany	Thuringia		dermbach	36466	50.7158	10.1198	29884	73
6166ba5b81e18c1c41cece7e	1024471106	IIMK	ncov	Human	B.1.1.7	20I (Alpha, V1)	2021-04-07	Europe	Germany	Thuringia		bad salzungen	36469	50.8117	10.2327	29884	76
6166ba5b81e18c1c41cece7f	1024471107	IIMK	ncov	Human	B.1.1.7	20I (Alpha, V1)	2021-04-07	Europe	Germany	Thuringia		bad salzungen	36469	50.8117	10.2327	29884	56
6166ba5b81e18c1c41cece80	1024550699	IIMK	ncov	Human	B.1.1.7	20I (Alpha, V1)	2021-04-06	Europe	Germany	Thuringia		straußfurt	99634	51.1622	10.9897	29884	1312
6166ba5b81e18c1c41cece8f	1024586835	IIMK	ncov	Human	B.1.1.7	20I (Alpha, V1)	2021-04-06	Europe	Germany	Thuringia		worbis	37339	51.4188	10.3625	29884	729
6166ba5b81e18c1c41cece94	1024586861	IIMK	ncov	Human	B.1.1.7	20I (Alpha, V1)	2021-04-06	Europe	Germany	Thuringia		heiligenstadt	37308	51.378	10.1376	29884	53
6166ba5b81e18c1c41cecdc4	1027540772	IIMK	ncov	Human	B.1.1.7	20I (Alpha, V1)	2021-04-04	Europe	Germany	Thuringia		stadtroda	7646	50.86	11.7281	29884	161
6166ba5b81e18c1c41cecdc6	1027540801	IIMK	ncov	Human	B.1.1.7	20I (Alpha, V1)	2021-04-05	Europe	Germany	Thuringia		stadtroda	7646	50.86	11.7281	29884	733
6166ba5b81e18c1c41cecdcc	1028090513	IIMK	ncov	Human	B.1.1.7	20I (Alpha, V1)	2021-04-03	Europe	Germany	Thuringia		jena	7743	50.9283	11.5853	29868	23
6166ba5b81e18c1c41cecdd5	1050193788	IIMK	ncov	Human	B.1.1.7	20I (Alpha, V1)	2021-04-03	Europe	Germany	Thuringia		gera	7549	50.8753	12.0788	29884	66
6166ba5b81e18c1c41cecdda	1050194135	IIMK	ncov	Human	B.1.1.7	20I (Alpha, V1)	2021-04-03	Europe	Germany	Thuringia		gera	7545	50.8753	12.0788	29884	71
6166ba5b81e18c1c41cecddd	1050194315	IIMK	ncov	Human	B.1.1.7	20I (Alpha, V1)	2021-04-04	Europe	Germany	Thuringia		weida	7570	50.7735	12.0614	29884	76
6166ba5b81e18c1c41cecddf	1050194557	IIMK	ncov	Human	B.1.1.7	20I (Alpha, V1)	2021-04-04	Europe	Germany	Thuringia		hermsdorf	7629	50.8961	11.8579	29884	500
6166ba5b81e18c1c41cecde3	1050194865	IIMK	ncov	Human	B.1.1.7	20I (Alpha, V1)	2021-04-05	Europe	Germany	Thuringia		gera	7548	50.8753	12.0788	29884	47
6166ba5b81e18c1c41cecded	1091316129	IIMK	ncov	Human	B.1.1.7	20I (Alpha, V1)	2021-04-03	Europe	Germany	Thuringia		arnstadt	99310	50.8343	10.9456	29884	52
6166ba5b81e18c1c41cecdf3	1091316203	IIMK	ncov	Human	B.1.1.7	20I (Alpha, V1)	2021-04-03	Europe	Germany	Thuringia		arnstadt	99310	50.8343	10.9456	29884	505
6166ba5b81e18c1c41cecdf6	1091316397	IIMK	ncov	Human	B.1.1.7	20I (Alpha, V1)	2021-04-03	Europe	Germany	Thuringia		arnstadt	99310	50.8343	10.9456	29884	579
6166ba5b81e18c1c41cecdf7	1091316420	IIMK	ncov	Human	B.1.1.7	20I (Alpha, V1)	2021-04-03	Europe	Germany	Thuringia		leinefelde	37327	51.3887	10.3268	29884	222
6166ba5b81e18c1c41cecdf8	1091316645	IIMK	ncov	Human	B.1.1.7	20I (Alpha, V1)	2021-04-03	Europe	Germany	Thuringia		jena	7751	50.9283	11.5853	29884	249
6166ba5b81e18c1c41cecdfe	1091316906	IIMK	ncov	Human	B.1.1.7	20I (Alpha, V1)	2021-04-03	Europe	Germany	Thuringia		arnstadt	99310	50.8343	10.9456	29884	720
6166ba5b81e18c1c41cece01	1091316922	IIMK	ncov	Human	B.1.1.7	20I (Alpha, V1)	2021-04-03	Europe	Germany	Thuringia		arnstadt	99310	50.8343	10.9456	29884	49
6166ba5b81e18c1c41cece07	1091317098	IIMK	ncov	Human	B.1.1.7	20I (Alpha, V1)	2021-04-04	Europe	Germany	Thuringia		jena	7747	50.9283	11.5853	29880	259
6166ba5b81e18c1c41cece09	1091317163	IIMK	ncov	Human	B.1.1.7	20I (Alpha, V1)	2021-04-04	Europe	Germany	Thuringia		arnstadt	99310	50.8343	10.9456	29884	169
6166ba5b81e18c1c41cece0b	1091317235	IIMK	ncov	Human	B.1.1.7	20I (Alpha, V1)	2021-04-04	Europe	Germany	Thuringia		arnstadt	99310	50.8343	10.9456	29877	919
6166ba5b81e18c1c41cece0d	1091317260	IIMK	ncov	Human	B.1.1.7	20I (Alpha, V1)	2021-04-04	Europe	Germany	Thuringia		arnstadt	99310	50.8343	10.9456	29877	112
6166ba5b81e18c1c41cece16	1091317571	IIMK	ncov	Human	B.1.1.7	20I (Alpha, V1)	2021-04-05	Europe	Germany	Thuringia		arnstadt	99310	50.8343	10.9456	29884	583
6166ba5b81e18c1c41cece1a	1091317620	IIMK	ncov	Human	B.1.1.7	20I (Alpha, V1)	2021-04-05	Europe	Germany	Thuringia		arnstadt	99310	50.8343	10.9456	29884	332
6166ba5b81e18c1c41cece1b	1091317721	IIMK	ncov	Human	B.1.1.7	20I (Alpha, V1)	2021-04-05	Europe	Germany	Thuringia		arnstadt	99310	50.8343	10.9456	29884	1038
6166ba5b81e18c1c41cece22	1024550703	IIMK	ncov	Human	B.1.1.7	20I (Alpha, V1)	2021-04-06	Europe	Germany	Thuringia		rastenberg	99636	51.1757	11.4201	29884	46
6166ba5b81e18c1c41cece23	1024550706	IIMK	ncov	Human	B.1.1.7	20I (Alpha, V1)	2021-04-06	Europe	Germany	Thuringia		sömmerda	99610	51.1627	11.1157	29884	37
6166ba5b81e18c1c41cece29	1027540766	IIMK	ncov	Human	B.1.1.7	20I (Alpha, V1)	2021-04-05	Europe	Germany	Thuringia		hermsdorf	7629	50.8961	11.8579	29884	890
6166ba5b81e18c1c41cece2b	1027540804	IIMK	ncov	Human	B.1.1.7	20I (Alpha, V1)	2021-04-05	Europe	Germany	Thuringia		crossen	7613	50.9646	11.984	29884	85
6166ba5b81e18c1c41cece2c	1027540841	IIMK	ncov	Human	B.1.1.7	20I (Alpha, V1)	2021-04-07	Europe	Germany	Thuringia		stadtroda	7646	50.86	11.7281	29884	121
6166ba5b81e18c1c41cece2e	1028090078	IIMK	ncov	Human	B.1.1.7	20I (Alpha, V1)	2021-04-03	Europe	Germany	Thuringia		jena	7743	50.9283	11.5853	29884	714
6166ba5b81e18c1c41cece30	1050194963	IIMK	ncov	Human	B.1.1.7	20I (Alpha, V1)	2021-04-05	Europe	Germany	Thuringia		gera	7551	50.8753	12.0788	29884	526
6166ba5b81e18c1c41cece36	1050195442	IIMK	ncov	Human	B.1.1.7	20I (Alpha, V1)	2021-04-05	Europe	Germany	Thuringia		gera	7549	50.8753	12.0788	29884	472
6166ba5b81e18c1c41cece38	1050196036	IIMK	ncov	Human	B.1.1.7	20I (Alpha, V1)	2021-04-06	Europe	Germany	Thuringia		crossen	7613	50.9646	11.984	29884	65
6166ba5b81e18c1c41cece3d	1091316445	IIMK	ncov	Human	B.1.1.7	20I (Alpha, V1)	2021-04-03	Europe	Germany	Thuringia		jena	7743	50.9283	11.5853	29884	84
6166ba5b81e18c1c41cece3f	1091316875	IIMK	ncov	Human	B.1.1.7	20I (Alpha, V1)	2021-04-03	Europe	Germany	Thuringia		arnstadt	99310	50.8343	10.9456	29884	1173
6166ba5b81e18c1c41cece40	1091316902	IIMK	ncov	Human	B.1.1.7	20I (Alpha, V1)	2021-04-03	Europe	Germany	Thuringia		arnstadt	99310	50.8343	10.9456	29884	517
6166ba5b81e18c1c41cece43	1091317696	IIMK	ncov	Human	B.1.1.7	20I (Alpha, V1)	2021-04-05	Europe	Germany	Thuringia		arnstadt	99310	50.8343	10.9456	29884	1087
6166ba5b81e18c1c41cece44	1091317697	IIMK	ncov	Human	B.1.1.7	20I (Alpha, V1)	2021-04-05	Europe	Germany	Thuringia		arnstadt	99310	50.8343	10.9456	29884	270
6166ba5b81e18c1c41cece46	1091317745	IIMK	ncov	Human	B.1.1.7	20I (Alpha, V1)	2021-04-05	Europe	Germany	Thuringia		weimar	99423	50.9803	11.3272	29884	662
6166ba5b81e18c1c41cece49	1091318986	IIMK	ncov	Human	B.1.1.7	20I (Alpha, V1)	2021-04-07	Europe	Germany	Thuringia		erfurt	99085	50.9775	11.0251	29884	51
6166ba5b81e18c1c41cece4f	1091319008	IIMK	ncov	Human	B.1.1.7	20I (Alpha, V1)	2021-04-07	Europe	Germany	Thuringia		stadtilm	99326	50776	11.0826	29884	23
6166ba5b81e18c1c41cece51	1091319013	IIMK	ncov	Human	B.1.1.7	20I (Alpha, V1)	2021-04-07	Europe	Germany	Thuringia		arnstadt	99310	50.8343	10.9456	29884	64
6166ba5b81e18c1c41cece52	1091319014	IIMK	ncov	Human	B.1.1.7	20I (Alpha, V1)	2021-04-07	Europe	Germany	Thuringia		grammetal	99428	50.9576	11.2199	29884	46
6166ba5b81e18c1c41cece5a	5002346121	IIMK	ncov	Human	B.1.1.7	20I (Alpha, V1)	2021-04-08	Europe	Germany	Thuringia		altenburg	4600	50.9851	12.4332	29884	733
6166ba5b81e18c1c41cece5b	5002346162	IIMK	ncov	Human	B.1.1.7	20I (Alpha, V1)	2021-04-08	Europe	Germany	Thuringia		gößnitz	4639	50889	12.4329	29884	732
6166ba5b81e18c1c41cece5e	5002361191	IIMK	ncov	Human	B.1.1.7	20I (Alpha, V1)	2021-04-08	Europe	Germany	Thuringia		meuselwitz	4610	51.047	12.2976	29884	572
6166ba5b81e18c1c41cece60	5002400453	IIMK	ncov	Human	B.1.1.7	20I (Alpha, V1)	2021-04-08	Europe	Germany	Thuringia		gößnitz	4639	50889	12.4329	29884	679
6166ba5b81e18c1c41cece61	5002417953	IIMK	ncov	Human	B.1.1.7	20I (Alpha, V1)	2021-04-08	Europe	Germany	Thuringia		berga/elster	7980	50.7503	12.1607	29884	671
6166ba5b81e18c1c41cece64	5002427691	IIMK	ncov	Human	B.1.1.7	20I (Alpha, V1)	2021-04-08	Europe	Germany	Thuringia		altenburg	4600	50.9851	12.4332	29884	354
6166ba5b81e18c1c41cece6c	1002047356	IIMK	ncov	Human	B.1.1.7	20I (Alpha, V1)	2021-04-06	Europe	Germany	Thuringia		zeulenroda-triebes	7937	50.6489	11.9803	29884	318
6166ba5b81e18c1c41cece77	1024471095	IIMK	ncov	Human	B.1.1.7	20I (Alpha, V1)	2021-04-07	Europe	Germany	Thuringia		unterbreizbach	36414	50.8172	9.97833	29884	55
6166ba5b81e18c1c41cece82	1024550704	IIMK	ncov	Human	B.1.1.7	20I (Alpha, V1)	2021-04-06	Europe	Germany	Thuringia		sömmerda	99610	51.1627	11.1157	29884	1029
6166ba5b81e18c1c41cece84	1024550711	IIMK	ncov	Human	B.1.1.7	20I (Alpha, V1)	2021-04-06	Europe	Germany	Thuringia		kölleda	99625	51.1878	11.2461	29884	823
6166ba5b81e18c1c41cece88	1024550720	IIMK	ncov	Human	B.1.1.7	20I (Alpha, V1)	2021-04-07	Europe	Germany	Thuringia		großrudestedt	99195	51.092	11.1	29884	608
6166ba5b81e18c1c41cece8c	1024586779	IIMK	ncov	Human	B.1.1.7	20I (Alpha, V1)	2021-04-05	Europe	Germany	Thuringia		arenshausen	37318	51.3624	10.0721	29884	168
6166ba5b81e18c1c41cece8d	1024586796	IIMK	ncov	Human	B.1.1.7	20I (Alpha, V1)	2021-04-06	Europe	Germany	Thuringia		worbis	37339	51.4188	10.3625	29884	51
6166ba5b81e18c1c41cece90	1024586842	IIMK	ncov	Human	B.1.1.7	20I (Alpha, V1)	2021-04-06	Europe	Germany	Thuringia		heiligenstadt	37308	51.378	10.1376	29884	657
6166ba5b81e18c1c41cece93	1024586859	IIMK	ncov	Human	B.1.1.7	20I (Alpha, V1)	2021-04-06	Europe	Germany	Thuringia		heiligenstadt	37308	51.378	10.1376	29884	1096
6166ba5b81e18c1c41cecdbf	1027540767	IIMK	ncov	Human	B.1.1.7	20I (Alpha, V1)	2021-04-04	Europe	Germany	Thuringia		stadtroda	7646	50.86	11.7281	29884	84
6166ba5b81e18c1c41cecdc0	1027540768	IIMK	ncov	Human	B.1.1.7	20I (Alpha, V1)	2021-04-04	Europe	Germany	Thuringia		stadtroda	7646	50.86	11.7281	29884	302
6166ba5b81e18c1c41cecdc7	1028050184	IIMK	ncov	Human	B.1.1.7	20I (Alpha, V1)	2021-04-03	Europe	Germany	Thuringia		schmölln	4626	50.8953	12.3497	29884	168
6166ba5b81e18c1c41cecdcd	1028090514	IIMK	ncov	Human	B.1.1.7	20I (Alpha, V1)	2021-04-03	Europe	Germany	Thuringia		jena	7743	50.9283	11.5853	29868	42
6166ba5b81e18c1c41cecdd1	1050192373	IIMK	ncov	Human	B.1.1.7	20I (Alpha, V1)	2021-04-01	Europe	Germany	Thuringia		zeulenroda-triebes	7937	50.6489	11.9803	29884	27
6166ba5b81e18c1c41cecdd3	1050192452	IIMK	ncov	Human	B.1.1.7	20I (Alpha, V1)	2021-04-01	Europe	Germany	Thuringia		gera	7545	50.8753	12.0788	29884	479
6166ba5b81e18c1c41cecdd7	1050193977	IIMK	ncov	Human	B.1.1.7	20I (Alpha, V1)	2021-04-03	Europe	Germany	Thuringia		gera	7546	50.8753	12.0788	29884	68
6166ba5b81e18c1c41cecdd8	1050194112	IIMK	ncov	Human	B.1.1.7	20I (Alpha, V1)	2021-04-03	Europe	Germany	Thuringia		weida	7570	50.7735	12.0614	29884	63
6166ba5b81e18c1c41cecddb	1050194150	IIMK	ncov	Human	B.1.1.7	20I (Alpha, V1)	2021-04-04	Europe	Germany	Thuringia		bad köstritz	7586	50.9301	12.0118	29884	167
6166ba5b81e18c1c41cecddc	1050194233	IIMK	ncov	Human	B.1.1.7	20I (Alpha, V1)	2021-04-04	Europe	Germany	Thuringia		berga/elster	7980	50.7503	12.1607	29884	48
6166ba5b81e18c1c41cecde2	1050194687	IIMK	ncov	Human	B.1.1.7	20I (Alpha, V1)	2021-04-04	Europe	Germany	Thuringia		ronneburg	7580	50.8628	12.1813	29884	846
6166ba5b81e18c1c41cecde7	1091316088	IIMK	ncov	Human	B.1.1.7	20I (Alpha, V1)	2021-04-03	Europe	Germany	Thuringia		arnstadt	99310	50.8343	10.9456	29884	828
6166ba5b81e18c1c41cecdef	1091316158	IIMK	ncov	Human	B.1.1.7	20I (Alpha, V1)	2021-04-03	Europe	Germany	Thuringia		arnstadt	99310	50.8343	10.9456	29884	724
6166ba5b81e18c1c41cecdf0	1091316177	IIMK	ncov	Human	B.1.1.7	20I (Alpha, V1)	2021-04-03	Europe	Germany	Thuringia		arnstadt	99310	50.8343	10.9456	29884	158
6166ba5b81e18c1c41cecdf1	1091316189	IIMK	ncov	Human	B.1.1.7	20I (Alpha, V1)	2021-04-03	Europe	Germany	Thuringia		arnstadt	99310	50.8343	10.9456	29884	64
6166ba5b81e18c1c41cecdf5	1091316310	IIMK	ncov	Human	B.1.1.7	20I (Alpha, V1)	2021-04-03	Europe	Germany	Thuringia		arnstadt	99310	50.8343	10.9456	29884	216
6166ba5b81e18c1c41cecdfd	1091316883	IIMK	ncov	Human	B.1.1.7	20I (Alpha, V1)	2021-04-03	Europe	Germany	Thuringia		arnstadt	99310	50.8343	10.9456	29884	36
6166ba5b81e18c1c41cece08	1091317137	IIMK	ncov	Human	B.1.1.7	20I (Alpha, V1)	2021-04-04	Europe	Germany	Thuringia		arnstadt	99310	50.8343	10.9456	29880	718
6166ba5b81e18c1c41cece0c	1091317259	IIMK	ncov	Human	B.1.1.7	20I (Alpha, V1)	2021-04-04	Europe	Germany	Thuringia		arnstadt	99310	50.8343	10.9456	29877	55
6166ba5b81e18c1c41cece0e	1091317265	IIMK	ncov	Human	B.1.1.7	20I (Alpha, V1)	2021-04-04	Europe	Germany	Thuringia		arnstadt	99310	50.8343	10.9456	29884	806
6166ba5b81e18c1c41cece0f	1091317267	IIMK	ncov	Human	B.1.1.7	20I (Alpha, V1)	2021-04-04	Europe	Germany	Thuringia		arnstadt	99310	50.8343	10.9456	29884	56
6166ba5b81e18c1c41cece11	1091317269	IIMK	ncov	Human	B.1.1.7	20I (Alpha, V1)	2021-04-04	Europe	Germany	Thuringia		arnstadt	99310	50.8343	10.9456	29884	87
6166ba5b81e18c1c41cece13	1091317272	IIMK	ncov	Human	B.1.1.7	20I (Alpha, V1)	2021-04-04	Europe	Germany	Thuringia		arnstadt	99310	50.8343	10.9456	29884	49
6166ba5b81e18c1c41cece1c	1091317733	IIMK	ncov	Human	B.1.1.7	20I (Alpha, V1)	2021-04-05	Europe	Germany	Thuringia		weimar	99423	50.9803	11.3272	29884	788
6166ba5b81e18c1c41cece25	1024550709	IIMK	ncov	Human	B.1.1.7	20I (Alpha, V1)	2021-04-06	Europe	Germany	Thuringia		kindelbrück	99638	51.2617	11.09	29884	81
6166ba5b81e18c1c41cece28	1025082633	IIMK	ncov	Human	B.1.1.7	20I (Alpha, V1)	2021-04-07	Europe	Germany	Thuringia		schkölen	7619	51.0417	11.8214	29884	147
6166ba5b81e18c1c41cece2f	1050194953	IIMK	ncov	Human	B.1.1.7	20I (Alpha, V1)	2021-04-05	Europe	Germany	Thuringia		gera	7549	50.8753	12.0788	29884	460
6166ba5b81e18c1c41cece31	1050195025	IIMK	ncov	Human	B.1.1.7	20I (Alpha, V1)	2021-04-05	Europe	Germany	Thuringia		brahmenau	7554	50.9222	12.16	29884	305
6166ba5b81e18c1c41cece33	1050195247	IIMK	ncov	Human	B.1.1.7	20I (Alpha, V1)	2021-04-05	Europe	Germany	Thuringia		gera	7548	50.8753	12.0788	29880	724
6166ba5b81e18c1c41cece34	1050195362	IIMK	ncov	Human	B.1.1.7	20I (Alpha, V1)	2021-04-05	Europe	Germany	Thuringia		gera	7549	50.8753	12.0788	29884	96
6166ba5b81e18c1c41cece35	1050195406	IIMK	ncov	Human	B.1.1.7	20I (Alpha, V1)	2021-04-05	Europe	Germany	Thuringia		gera	7548	50.8753	12.0788	29884	337
6166ba5b81e18c1c41cece3b	1050196158	IIMK	ncov	Human	B.1.1.7	20I (Alpha, V1)	2021-04-06	Europe	Germany	Thuringia		gera	7546	50.8753	12.0788	29883	401
6166ba5b81e18c1c41cece45	1091317722	IIMK	ncov	Human	B.1.1.7	20I (Alpha, V1)	2021-04-05	Europe	Germany	Thuringia		weimar	99423	50.9803	11.3272	29884	85
6166ba5b81e18c1c41cece4b	1091318995	IIMK	ncov	Human	B.1.1.7	20I (Alpha, V1)	2021-04-07	Europe	Germany	Thuringia		erfurt	99097	50.9775	11.0251	29884	30
6166ba5b81e18c1c41cece53	2010759580	IIMK	ncov	Human	B.1.1.7	20I (Alpha, V1)	2021-04-08	Europe	Germany	Thuringia		altenburg	4600	50.9851	12.4332	29884	712
6166ba5b81e18c1c41cece54	5001955366	IIMK	ncov	Human	B.1.1.7	20I (Alpha, V1)	2021-04-08	Europe	Germany	Thuringia		gera	7552	50.8753	12.0788	29880	609
6166ba5b81e18c1c41cece56	5002279495	IIMK	ncov	Human	B.1.1.7	20I (Alpha, V1)	2021-04-08	Europe	Germany	Thuringia		brahmenau	7554	50.9222	12.16	29884	556
6166ba5b81e18c1c41cece59	5002302045	IIMK	ncov	Human	B.1.1.7	20I (Alpha, V1)	2021-04-08	Europe	Germany	Thuringia		gera	7546	50.8753	12.0788	29884	714
6166ba5b81e18c1c41cece5f	5002372384	IIMK	ncov	Human	B.1.1.7	20I (Alpha, V1)	2021-04-08	Europe	Germany	Thuringia		gera	7548	50.8753	12.0788	29884	761
6166ba5b81e18c1c41cece67	5002471679	IIMK	ncov	Human	B.1.1.7	20I (Alpha, V1)	2021-04-08	Europe	Germany	Thuringia		bad klosterlausnitz	7639	50.9164	11.868	29884	747
6166ba5b81e18c1c41cece6a	5002483324	IIMK	ncov	Human	B.1.1.7	20I (Alpha, V1)	2021-04-08	Europe	Germany	Thuringia		schmölln	4626	50.8953	12.3497	29884	649
6166ba5b81e18c1c41cece6e	1004352034	IIMK	ncov	Human	B.1.1.7	20I (Alpha, V1)	2021-04-06	Europe	Germany	Thuringia		weida	7570	50.7735	12.0614	29884	54
6166ba5b81e18c1c41cece78	1024471097	IIMK	ncov	Human	B.1.1.7	20I (Alpha, V1)	2021-04-07	Europe	Germany	Thuringia		unterbreizbach	36414	50.8172	9.97833	29884	681
6166ba5b81e18c1c41cece79	1024471098	IIMK	ncov	Human	B.1.1.7	20I (Alpha, V1)	2021-04-07	Europe	Germany	Thuringia		unterbreizbach	36414	50.8172	9.97833	29884	1196
6166ba5b81e18c1c41cece7d	1024471104	IIMK	ncov	Human	B.1.1.7	20I (Alpha, V1)	2021-04-07	Europe	Germany	Thuringia		bad liebenstein	36448	50.8176	10.3491	29884	83
6166ba5b81e18c1c41cece81	1024550701	IIMK	ncov	Human	B.1.1.7	20I (Alpha, V1)	2021-04-06	Europe	Germany	Thuringia		sömmerda	99610	51.1627	11.1157	29890	1029
6166ba5b81e18c1c41cece83	1024550707	IIMK	ncov	Human	B.1.1.7	20I (Alpha, V1)	2021-04-06	Europe	Germany	Thuringia		sömmerda	99610	51.1627	11.1157	29884	69
6166ba5b81e18c1c41cece85	1024550716	IIMK	ncov	Human	B.1.1.7	20I (Alpha, V1)	2021-04-07	Europe	Germany	Thuringia		sömmerda	99610	51.1627	11.1157	29884	312
6166ba5b81e18c1c41cece89	1024550723	IIMK	ncov	Human	B.1.1.7	20I (Alpha, V1)	2021-04-07	Europe	Germany	Thuringia		sömmerda	99610	51.1627	11.1157	29884	298
6166ba5b81e18c1c41cece8b	1024586710	IIMK	ncov	Human	B.1.1.7	20I (Alpha, V1)	2021-04-05	Europe	Germany	Thuringia		arenshausen	37318	51.3624	10.0721	29880	401
6166ba5b81e18c1c41cece95	1024586863	IIMK	ncov	Human	B.1.1.7	20I (Alpha, V1)	2021-04-06	Europe	Germany	Thuringia		dingelstädt	37351	51.3156	10.3215	29884	52
6166ba5b81e18c1c41cecdc1	1027540769	IIMK	ncov	Human	B.1.1.7	20I (Alpha, V1)	2021-04-04	Europe	Germany	Thuringia		stadtroda	7646	50.86	11.7281	29884	58
6166ba5b81e18c1c41cecdca	1028090511	IIMK	ncov	Human	B.1.1.7	20I (Alpha, V1)	2021-04-03	Europe	Germany	Thuringia		jena	7743	50.9283	11.5853	29884	246
6166ba5b81e18c1c41cecdce	1028090515	IIMK	ncov	Human	B.1.1.7	20I (Alpha, V1)	2021-04-03	Europe	Germany	Thuringia		jena	7743	50.9283	11.5853	29884	148
6166ba5b81e18c1c41cecdcf	1028090518	IIMK	ncov	Human	B.1.1.7	20I (Alpha, V1)	2021-04-03	Europe	Germany	Thuringia		jena	7743	50.9283	11.5853	29884	54
6166ba5b81e18c1c41cecdd4	1050193770	IIMK	ncov	Human	B.1.1.7	20I (Alpha, V1)	2021-04-03	Europe	Germany	Thuringia		gera	7548	50.8753	12.0788	29884	49
6166ba5b81e18c1c41cecdd6	1050193827	IIMK	ncov	Human	B.1.1.7	20I (Alpha, V1)	2021-04-03	Europe	Germany	Thuringia		weida	7570	50.7735	12.0614	29884	81
6166ba5b81e18c1c41cecde0	1050194615	IIMK	ncov	Human	B.1.1.7	20I (Alpha, V1)	2021-04-04	Europe	Germany	Thuringia		gera	7546	50.8753	12.0788	29883	542
6166ba5b81e18c1c41cecde1	1050194651	IIMK	ncov	Human	B.1.1.7	20I (Alpha, V1)	2021-04-04	Europe	Germany	Thuringia		gera	7551	50.8753	12.0788	29884	235
6166ba5b81e18c1c41cecde4	1091314712	IIMK	ncov	Human	B.1.1.7	20I (Alpha, V1)	2021-03-31	Europe	Germany	Thuringia		heiligenstadt	37308	51.378	10.1376	29884	148
6166ba5b81e18c1c41cecde8	1091316097	IIMK	ncov	Human	B.1.1.7	20I (Alpha, V1)	2021-04-03	Europe	Germany	Thuringia		arnstadt	99310	50.8343	10.9456	29884	82
6166ba5b81e18c1c41cecde9	1091316106	IIMK	ncov	Human	B.1.1.7	20I (Alpha, V1)	2021-04-03	Europe	Germany	Thuringia		arnstadt	99310	50.8343	10.9456	29884	164
6166ba5b81e18c1c41cecdf2	1091316190	IIMK	ncov	Human	B.1.1.7	20I (Alpha, V1)	2021-04-03	Europe	Germany	Thuringia		arnstadt	99310	50.8343	10.9456	29880	244
6166ba5b81e18c1c41cecdf4	1091316307	IIMK	ncov	Human	B.1.1.7	20I (Alpha, V1)	2021-04-03	Europe	Germany	Thuringia		arnstadt	99310	50.8343	10.9456	29884	697
6166ba5b81e18c1c41cecdf9	1091316721	IIMK	ncov	Human	B.1.1.7	20I (Alpha, V1)	2021-04-03	Europe	Germany	Thuringia		jena	7751	50.9283	11.5853	29884	30
6166ba5b81e18c1c41cecdfb	1091316844	IIMK	ncov	Human	B.1.1.7	20I (Alpha, V1)	2021-04-03	Europe	Germany	Thuringia		arnstadt	99310	50.8343	10.9456	29880	682
6166ba5b81e18c1c41cecdfc	1091316878	IIMK	ncov	Human	B.1.1.7	20I (Alpha, V1)	2021-04-03	Europe	Germany	Thuringia		arnstadt	99310	50.8343	10.9456	29884	111
6166ba5b81e18c1c41cecdff	1091316912	IIMK	ncov	Human	B.1.1.7	20I (Alpha, V1)	2021-04-03	Europe	Germany	Thuringia		arnstadt	99310	50.8343	10.9456	29884	68
6166ba5b81e18c1c41cece00	1091316920	IIMK	ncov	Human	B.1.1.7	20I (Alpha, V1)	2021-04-03	Europe	Germany	Thuringia		arnstadt	99310	50.8343	10.9456	29884	50
6166ba5b81e18c1c41cece02	1091316925	IIMK	ncov	Human	B.1.1.7	20I (Alpha, V1)	2021-04-03	Europe	Germany	Thuringia		arnstadt	99310	50.8343	10.9456	29884	298
6166ba5b81e18c1c41cece04	1091316985	IIMK	ncov	Human	B.1.1.7	20I (Alpha, V1)	2021-04-04	Europe	Germany	Thuringia		camburg	7774	51.0514	11.7055	29884	648
6166ba5b81e18c1c41cece14	1091317276	IIMK	ncov	Human	B.1.1.7	20I (Alpha, V1)	2021-04-04	Europe	Germany	Thuringia		arnstadt	99310	50.8343	10.9456	29884	415
6166ba5b81e18c1c41cece17	1091317576	IIMK	ncov	Human	B.1.1.7	20I (Alpha, V1)	2021-04-05	Europe	Germany	Thuringia		arnstadt	99310	50.8343	10.9456	29884	1169
6166ba5b81e18c1c41cece1f	1091317757	IIMK	ncov	Human	B.1.1.7	20I (Alpha, V1)	2021-04-05	Europe	Germany	Thuringia		weimar	99423	50.9803	11.3272	29884	386
6166ba5b81e18c1c41cece20	1000421361	IIMK	ncov	Human	B.1.1.7	20I (Alpha, V1)	2021-04-06	Europe	Germany	Thuringia		erfurt	99084	50.9775	11.0251	29884	109
6166ba5b81e18c1c41cece24	1024550708	IIMK	ncov	Human	B.1.1.7	20I (Alpha, V1)	2021-04-06	Europe	Germany	Thuringia		sömmerda	99610	51.1627	11.1157	29884	164
6166ba5b81e18c1c41cece26	1024586677	IIMK	ncov	Human	B.1.1.7	20I (Alpha, V1)	2021-04-03	Europe	Germany	Thuringia		küllstedt	37359	51.2758	10.2804	29884	742
6166ba5b81e18c1c41cece2a	1027540774	IIMK	ncov	Human	B.1.1.7	20I (Alpha, V1)	2021-04-07	Europe	Germany	Thuringia		stadtroda	7646	50.86	11.7281	29884	120
6166ba5b81e18c1c41cece3c	1050196173	IIMK	ncov	Human	B.1.1.7	20I (Alpha, V1)	2021-04-06	Europe	Germany	Thuringia		weida	7570	50.7735	12.0614	29884	255
6166ba5b81e18c1c41cece41	1091316930	IIMK	ncov	Human	B.1.1.7	20I (Alpha, V1)	2021-04-03	Europe	Germany	Thuringia		arnstadt	99310	50.8343	10.9456	29884	162
6166ba5b81e18c1c41cece42	1091317695	IIMK	ncov	Human	B.1.1.7	20I (Alpha, V1)	2021-04-05	Europe	Germany	Thuringia		arnstadt	99310	50.8343	10.9456	29884	205
6166ba5b81e18c1c41cece47	1091318062	IIMK	ncov	Human	B.1.1.7	20I (Alpha, V1)	2021-04-06	Europe	Germany	Thuringia		jena	7743	50.9283	11.5853	29882	196
6166ba5b81e18c1c41cece48	1091318381	IIMK	ncov	Human	B.1.1.7	20I (Alpha, V1)	2021-04-06	Europe	Germany	Thuringia		jena	7751	50.9283	11.5853	29880	178
6166ba5b81e18c1c41cece4d	1091318999	IIMK	ncov	Human	B.1.1.7	20I (Alpha, V1)	2021-04-07	Europe	Germany	Thuringia		erfurt	99089	50.9775	11.0251	29884	35
6166ba5b81e18c1c41cece4e	1091319000	IIMK	ncov	Human	B.1.1.7	20I (Alpha, V1)	2021-04-07	Europe	Germany	Thuringia		gotha	99867	50.9461	10.6962	29849	53
6166ba5b81e18c1c41cece50	1091319012	IIMK	ncov	Human	B.1.1.7	20I (Alpha, V1)	2021-04-07	Europe	Germany	Thuringia		erfurt	99084	50.9775	11.0251	29884	50
6166ba5b81e18c1c41cece55	5002279492	IIMK	ncov	Human	B.1.1.7	20I (Alpha, V1)	2021-04-08	Europe	Germany	Thuringia		brahmenau	7554	50.9222	12.16	29884	295
6166ba5b81e18c1c41cece5d	5002346257	IIMK	ncov	Human	B.1.1.7	20I (Alpha, V1)	2021-04-08	Europe	Germany	Thuringia		meuselwitz	4610	51.047	12.2976	29884	690
6166ba5b81e18c1c41cece63	5002427669	IIMK	ncov	Human	B.1.1.7	20I (Alpha, V1)	2021-04-08	Europe	Germany	Thuringia		altenburg	4600	50.9851	12.4332	29884	648
6166ba5b81e18c1c41cece68	5002471682	IIMK	ncov	Human	B.1.1.7	20I (Alpha, V1)	2021-04-08	Europe	Germany	Thuringia		hermsdorf	7629	50.8961	11.8579	29878	682
6166ba5b81e18c1c41cece6b	1000421360	IIMK	ncov	Human	B.1.1.7	20I (Alpha, V1)	2021-04-07	Europe	Germany	Thuringia		erfurt	99084	50.9775	11.0251	29884	1225
6166ba5b81e18c1c41cece6f	1009018375	IIMK	ncov	Human	B.1.1.7	20I (Alpha, V1)	2021-04-06	Europe	Germany	Thuringia		stadtroda	7646	50.86	11.7281	29884	227
6166ba5b81e18c1c41cece70	1009018380	IIMK	ncov	Human	B.1.1.7	20I (Alpha, V1)	2021-04-06	Europe	Germany	Thuringia		triptis	7819	50.7355	11.8639	29864	220
6166ba5b81e18c1c41cece7c	1024471102	IIMK	ncov	Human	B.1.1.7	20I (Alpha, V1)	2021-04-07	Europe	Germany	Thuringia		bad liebenstein	36448	50.8176	10.3491	29884	289
6166ba5b81e18c1c41cece86	1024550717	IIMK	ncov	Human	B.1.1.7	20I (Alpha, V1)	2021-04-07	Europe	Germany	Thuringia		sömmerda	99610	51.1627	11.1157	29884	216
6166ba5b81e18c1c41cece87	1024550718	IIMK	ncov	Human	B.1.1.7	20I (Alpha, V1)	2021-04-07	Europe	Germany	Thuringia		sömmerda	99610	51.1627	11.1157	29884	357
6166ba5b81e18c1c41cece8a	1024586703	IIMK	ncov	Human	B.1.1.7	20I (Alpha, V1)	2021-04-05	Europe	Germany	Thuringia		küllstedt	37359	51.2758	10.2804	29884	321
6166ba5b81e18c1c41cece8e	1024586826	IIMK	ncov	Human	B.1.1.7	20I (Alpha, V1)	2021-04-06	Europe	Germany	Thuringia		dingelstädt	37351	51.3156	10.3215	29884	56
6166ba5b81e18c1c41cece91	1024586846	IIMK	ncov	Human	B.1.1.7	20I (Alpha, V1)	2021-04-06	Europe	Germany	Thuringia		arenshausen	37318	51.3624	10.0721	29880	827
6166ba5b81e18c1c41cece92	1024586848	IIMK	ncov	Human	B.1.1.7	20I (Alpha, V1)	2021-04-06	Europe	Germany	Thuringia		heiligenstadt	37308	51.378	10.1376	29884	845
6166ba5b81e18c1c41cece96	1024586866	IIMK	ncov	Human	B.1.1.7	20I (Alpha, V1)	2021-04-06	Europe	Germany	Thuringia		niederorschel	37355	51.3722	10.4237	29884	87
6166ba5b81e18c1c41cece97	1024586868	IIMK	ncov	Human	B.1.1.7	20I (Alpha, V1)	2021-04-06	Europe	Germany	Thuringia		niederorschel	37355	51.3722	10.4237	29884	710
6166ba5b81e18c1c41cece98	1024586879	IIMK	ncov	Human	B.1.1.7	20I (Alpha, V1)	2021-04-06	Europe	Germany	Thuringia		niederorschel	37355	51.3722	10.4237	29884	106
6166ba5b81e18c1c41cece9b	1024586913	IIMK	ncov	Human	B.1.1.7	20I (Alpha, V1)	2021-04-07	Europe	Germany	Thuringia		niederorschel	37355	51.3722	10.4237	29884	1208
6166ba5b81e18c1c41cece9c	1024586916	IIMK	ncov	Human	B.1.1.7	20I (Alpha, V1)	2021-04-07	Europe	Germany	Thuringia		heiligenstadt	37308	51.378	10.1376	29884	695
6166ba5b81e18c1c41cece9e	1024586931	IIMK	ncov	Human	B.1.1.7	20I (Alpha, V1)	2021-04-07	Europe	Germany	Thuringia		dingelstädt	37351	51.3156	10.3215	29884	955
6166ba5b81e18c1c41cecea2	1024625397	IIMK	ncov	Human	B.1.1.7	20I (Alpha, V1)	2021-04-07	Europe	Germany	Thuringia		nesse-apfelstädt	99192	50.921	10.9039	29884	807
6166ba5b81e18c1c41cecea3	1024625401	IIMK	ncov	Human	B.1.1.7	20I (Alpha, V1)	2021-04-07	Europe	Germany	Thuringia		ohrdruf	99885	50.8288	10.7341	29884	992
6166ba5b81e18c1c41cecea9	1024625458	IIMK	ncov	Human	B.1.1.7	20I (Alpha, V1)	2021-04-07	Europe	Germany	Thuringia		friedrichroda	99894	50.8575	10.5651	29884	809
6166ba5b81e18c1c41ceceae	1024625679	IIMK	ncov	Human	B.1.1.7	20I (Alpha, V1)	2021-04-07	Europe	Germany	Thuringia		gotha	99867	50.9461	10.6962	29884	159
6166ba5b81e18c1c41ceceb2	1024626371	IIMK	ncov	Human	B.1.1.7	20I (Alpha, V1)	2021-04-07	Europe	Germany	Thuringia		großvargula	99958	51075	10.7333	29884	1125
6166ba5b81e18c1c41ceceb9	1027540775	IIMK	ncov	Human	B.1.1.7	20I (Alpha, V1)	2021-04-07	Europe	Germany	Thuringia		stadtroda	7646	50.86	11.7281	29884	82
6166ba5b81e18c1c41cecebc	1027540800	IIMK	ncov	Human	B.1.1.7	20I (Alpha, V1)	2021-04-05	Europe	Germany	Thuringia		kahla	7768	50.802	11.5882	29880	580
6166ba5b81e18c1c41cecec0	1027790004	IIMK	ncov	Human	B.1.1.7	20I (Alpha, V1)	2021-04-07	Europe	Germany	Thuringia		stadtroda	7646	50.86	11.7281	29884	867
6166ba5b81e18c1c41cecec1	1027790009	IIMK	ncov	Human	B.1.1.7	20I (Alpha, V1)	2021-04-07	Europe	Germany	Thuringia		stadtroda	7646	50.86	11.7281	29884	851
6166ba5b81e18c1c41cecec3	1027890008	IIMK	ncov	Human	B.1.1.7	20I (Alpha, V1)	2021-04-06	Europe	Germany	Thuringia		jena	7745	50.9283	11.5853	29884	72
6166ba5b81e18c1c41cecedb	1091317754	IIMK	ncov	Human	B.1.1.7	20I (Alpha, V1)	2021-04-05	Europe	Germany	Thuringia		weimar	99423	50.9803	11.3272	29884	208
6166ba5b81e18c1c41cecedf	1091318574	IIMK	ncov	Human	B.1.1.7	20I (Alpha, V1)	2021-04-07	Europe	Germany	Thuringia		weimar	99423	50.9803	11.3272	29884	154
6166ba5b81e18c1c41cecee2	1091318609	IIMK	ncov	Human	B.1.1.7	20I (Alpha, V1)	2021-04-06	Europe	Germany	Thuringia		arnstadt	99310	50.8343	10.9456	29884	186
6166ba5b81e18c1c41cecee5	1091318650	IIMK	ncov	Human	B.1.1.7	20I (Alpha, V1)	2021-04-06	Europe	Germany	Thuringia		arnstadt	99310	50.8343	10.9456	29884	226
6166ba5b81e18c1c41cecee7	1091318674	IIMK	ncov	Human	B.1.1.7	20I (Alpha, V1)	2021-04-07	Europe	Germany	Thuringia		arnstadt	99310	50.8343	10.9456	29884	81
6166ba5b81e18c1c41ceceea	1091318717	IIMK	ncov	Human	B.1.1.7	20I (Alpha, V1)	2021-04-07	Europe	Germany	Thuringia		arnstadt	99310	50.8343	10.9456	29884	1242
6166ba5b81e18c1c41cecef0	1091319675	IIMK	ncov	Human	B.1.1.7	20I (Alpha, V1)	2021-04-07	Europe	Germany	Thuringia		weimar	99423	50.9803	11.3272	29884	1074
6166ba5b81e18c1c41cecef2	1091319690	IIMK	ncov	Human	B.1.1.7	20I (Alpha, V1)	2021-04-07	Europe	Germany	Thuringia		weimar	99423	50.9803	11.3272	29884	1332
6166ba5b81e18c1c41cecef9	1091319953	IIMK	ncov	Human	B.1.1.7	20I (Alpha, V1)	2021-04-07	Europe	Germany	Thuringia		arnstadt	99310	50.8343	10.9456	29884	749
6166ba5b81e18c1c41cecefb	1091320000	IIMK	ncov	Human	B.1.1.7	20I (Alpha, V1)	2021-04-07	Europe	Germany	Thuringia		arnstadt	99310	50.8343	10.9456	29884	1222
6166ba5b81e18c1c41cecefd	1091320036	IIMK	ncov	Human	B.1.1.7	20I (Alpha, V1)	2021-04-07	Europe	Germany	Thuringia		arnstadt	99310	50.8343	10.9456	29884	360
6166ba5b81e18c1c41ceceff	1091320108	IIMK	ncov	Human	B.1.1.7	20I (Alpha, V1)	2021-04-07	Europe	Germany	Thuringia		heiligenstadt	37308	51.378	10.1376	29884	690
6166ba5b81e18c1c41cecf00	1091320138	IIMK	ncov	Human	B.1.1.7	20I (Alpha, V1)	2021-04-07	Europe	Germany	Thuringia		bad langensalza	99947	51.1089	10.6475	29888	422
6166ba5b81e18c1c41cecf03	1091320176	IIMK	ncov	Human	B.1.1.7	20I (Alpha, V1)	2021-04-07	Europe	Germany	Thuringia		rodeberg	99976	51.2479	10.3519	29884	544
6166ba5b81e18c1c41cecf07	1091320316	IIMK	ncov	Human	B.1.1.7	20I (Alpha, V1)	2021-04-08	Europe	Germany	Thuringia		nordhausen	99734	51.4946	10.7878	29884	780
6166ba5b81e18c1c41cecf0f	1000421778	IIMK	ncov	Human	B.1.1.7	20I (Alpha, V1)	2021-04-08	Europe	Germany	Thuringia		erfurt	99084	50.9775	11.0251	29884	55
6166ba5b81e18c1c41cecf13	1024550713	IIMK	ncov	Human	B.1.1.7	20I (Alpha, V1)	2021-04-07	Europe	Germany	Thuringia		sömmerda	99610	51.1627	11.1157	29884	72
6166ba5b81e18c1c41cecf18	1024550731	IIMK	ncov	Human	B.1.1.7	20I (Alpha, V1)	2021-04-07	Europe	Germany	Thuringia		bad tennstedt	99955	51.1537	10.8384	29884	307
6166ba5b81e18c1c41cecf1b	1024586887	IIMK	ncov	Human	B.1.1.7	20I (Alpha, V1)	2021-04-07	Europe	Germany	Thuringia		heiligenstadt	37308	51.378	10.1376	29884	264
6166ba5b81e18c1c41cecf1d	1024586899	IIMK	ncov	Human	B.1.1.7	20I (Alpha, V1)	2021-04-07	Europe	Germany	Thuringia		heiligenstadt	37308	51.378	10.1376	29884	252
6166ba5b81e18c1c41cecf24	1024586938	IIMK	ncov	Human	B.1.1.7	20I (Alpha, V1)	2021-04-08	Europe	Germany	Thuringia		dingelstädt	37351	51.3156	10.3215	29884	73
6166ba5b81e18c1c41cecf2a	1024625707	IIMK	ncov	Human	B.1.1.7	20I (Alpha, V1)	2021-04-08	Europe	Germany	Thuringia		georgenthal/thür.wald	99887	50.8321	10.6627	29883	96
6166ba5b81e18c1c41cecf2c	1024625718	IIMK	ncov	Human	B.1.1.7	20I (Alpha, V1)	2021-04-08	Europe	Germany	Thuringia		großfahner	99100	51.0558	10.8271	29884	58
6166ba5b81e18c1c41cecf2d	1024625719	IIMK	ncov	Human	B.1.1.7	20I (Alpha, V1)	2021-04-08	Europe	Germany	Thuringia		großfahner	99100	51.0558	10.8271	29884	353
6166ba5b81e18c1c41cecf2f	1024625730	IIMK	ncov	Human	B.1.1.7	20I (Alpha, V1)	2021-04-08	Europe	Germany	Thuringia		gotha	99867	50.9461	10.6962	29884	103
6166ba5b81e18c1c41cecf30	1024625732	IIMK	ncov	Human	B.1.1.7	20I (Alpha, V1)	2021-04-08	Europe	Germany	Thuringia		nesse-apfelstädt	99192	50.921	10.9039	29884	77
6166ba5b81e18c1c41cecf31	1024625741	IIMK	ncov	Human	B.1.1.7	20I (Alpha, V1)	2021-04-08	Europe	Germany	Thuringia		georgenthal/thür.wald	99887	50.8321	10.6627	29883	81
6166ba5b81e18c1c41cecf36	1024625764	IIMK	ncov	Human	B.1.1.7	20I (Alpha, V1)	2021-04-08	Europe	Germany	Thuringia		dreigleichen	99869	50.8916	10.8103	29884	43
6166ba5b81e18c1c41cecf38	1024626378	IIMK	ncov	Human	B.1.1.7	20I (Alpha, V1)	2021-04-08	Europe	Germany	Thuringia		dreigleichen	99869	50.8916	10.8103	29849	139
6166ba5b81e18c1c41cecf3f	1027790005	IIMK	ncov	Human	B.1.1.7	20I (Alpha, V1)	2021-04-08	Europe	Germany	Thuringia		stadtroda	7646	50.86	11.7281	29878	65
6166ba5b81e18c1c41cecf43	1028840007	IIMK	ncov	Human	B.1.1.7	20I (Alpha, V1)	2021-04-07	Europe	Germany	Thuringia		sondershausen	99706	51.3677	10.8675	29884	75
6166ba5b81e18c1c41cecf46	1050197960	IIMK	ncov	Human	B.1.1.7	20I (Alpha, V1)	2021-04-07	Europe	Germany	Thuringia		langenwetzendorf	7957	50.6799	12.095	29884	54
6166ba5b81e18c1c41cecf49	1050198705	IIMK	ncov	Human	B.1.1.7	20I (Alpha, V1)	2021-04-08	Europe	Germany	Thuringia		gera	7549	50.8753	12.0788	29884	513
6166ba5b81e18c1c41cecf4a	1050198801	IIMK	ncov	Human	B.1.1.7	20I (Alpha, V1)	2021-04-08	Europe	Germany	Thuringia		gera	7545	50.8753	12.0788	29884	319
6166ba5b81e18c1c41cecf4b	1050198816	IIMK	ncov	Human	B.1.1.7	20I (Alpha, V1)	2021-04-08	Europe	Germany	Thuringia		saalburg-ebersdorf	7929	50.5022	11.7325	29884	254
6166ba5b81e18c1c41cecf4e	1091319702	IIMK	ncov	Human	B.1.1.7	20I (Alpha, V1)	2021-04-07	Europe	Germany	Thuringia		weimar	99423	50.9803	11.3272	29884	96
6166ba5b81e18c1c41cecf52	1091319943	IIMK	ncov	Human	B.1.1.7	20I (Alpha, V1)	2021-04-07	Europe	Germany	Thuringia		arnstadt	99310	50.8343	10.9456	29884	57
6166ba5b81e18c1c41cecf5f	1091320981	IIMK	ncov	Human	B.1.1.7	20I (Alpha, V1)	2021-04-08	Europe	Germany	Thuringia		jena	7745	50.9283	11.5853	29884	52
6166ba5b81e18c1c41cecf60	1091320985	IIMK	ncov	Human	B.1.1.7	20I (Alpha, V1)	2021-04-08	Europe	Germany	Thuringia		jena	7751	50.9283	11.5853	29880	941
6166ba5b81e18c1c41cecf62	1091320991	IIMK	ncov	Human	B.1.1.7	20I (Alpha, V1)	2021-04-08	Europe	Germany	Thuringia		worbis	37339	51.4188	10.3625	29884	38
6166ba5b81e18c1c41cecf65	1091320999	IIMK	ncov	Human	B.1.1.7	20I (Alpha, V1)	2021-04-08	Europe	Germany	Thuringia		weimar	99401	50.9803	11.3272	29884	82
6166ba5b81e18c1c41cecf69	1091321108	IIMK	ncov	Human	B.1.1.7	20I (Alpha, V1)	2021-04-08	Europe	Germany	Thuringia		arnstadt	99310	50.8343	10.9456	29884	66
6166ba5b81e18c1c41cece9a	1024586912	IIMK	ncov	Human	B.1.1.7	20I (Alpha, V1)	2021-04-07	Europe	Germany	Thuringia		niederorschel	37355	51.3722	10.4237	29884	742
6166ba5b81e18c1c41cece9d	1024586924	IIMK	ncov	Human	B.1.1.7	20I (Alpha, V1)	2021-04-07	Europe	Germany	Thuringia		worbis	37339	51.4188	10.3625	29884	781
6166ba5b81e18c1c41cecea4	1024625425	IIMK	ncov	Human	B.1.1.7	20I (Alpha, V1)	2021-04-07	Europe	Germany	Thuringia		georgenthal/thür.wald	99887	50.8321	10.6627	29884	984
6166ba5b81e18c1c41cecea5	1024625427	IIMK	ncov	Human	B.1.1.7	20I (Alpha, V1)	2021-04-08	Europe	Germany	Thuringia		waltershausen	99880	50.8998	10.5563	29884	1069
6166ba5b81e18c1c41cecea7	1024625443	IIMK	ncov	Human	B.1.1.7	20I (Alpha, V1)	2021-04-07	Europe	Germany	Thuringia		georgenthal/thür.wald	99887	50.8321	10.6627	29884	769
6166ba5b81e18c1c41cecea8	1024625447	IIMK	ncov	Human	B.1.1.7	20I (Alpha, V1)	2021-04-07	Europe	Germany	Thuringia		gotha	99867	50.9461	10.6962	29884	66
6166ba5b81e18c1c41ceceaa	1024625461	IIMK	ncov	Human	B.1.1.7	20I (Alpha, V1)	2021-04-07	Europe	Germany	Thuringia		gotha	99867	50.9461	10.6962	29884	82
6166ba5b81e18c1c41ceceb0	1024625692	IIMK	ncov	Human	B.1.1.7	20I (Alpha, V1)	2021-04-07	Europe	Germany	Thuringia		gotha	99867	50.9461	10.6962	29884	77
6166ba5b81e18c1c41ceceb3	1024626376	IIMK	ncov	Human	B.1.1.7	20I (Alpha, V1)	2021-04-08	Europe	Germany	Thuringia		gotha	99867	50.9461	10.6962	29884	1041
6166ba5b81e18c1c41ceceb4	1024626380	IIMK	ncov	Human	B.1.1.7	20I (Alpha, V1)	2021-04-07	Europe	Germany	Thuringia		gotha	99867	50.9461	10.6962	29884	938
6166ba5b81e18c1c41ceceb8	1027540773	IIMK	ncov	Human	B.1.1.7	20I (Alpha, V1)	2021-04-07	Europe	Germany	Thuringia		eisenberg	7607	50.9689	11.8964	29884	105
6166ba5b81e18c1c41cecebd	1027540831	IIMK	ncov	Human	B.1.1.7	20I (Alpha, V1)	2021-04-07	Europe	Germany	Thuringia		eisenberg	7607	50.9689	11.8964	29884	180
6166ba5b81e18c1c41cecec7	1028090087	IIMK	ncov	Human	B.1.1.7	20I (Alpha, V1)	2021-04-05	Europe	Germany	Thuringia		jena	7703	50.9283	11.5853	29884	262
6166ba5b81e18c1c41cececc	1050196746	IIMK	ncov	Human	B.1.1.7	20I (Alpha, V1)	2021-04-06	Europe	Germany	Thuringia		neustadt an der orla	7806	50.7367	11.7444	29884	1072
6166ba5b81e18c1c41cececd	1050196910	IIMK	ncov	Human	B.1.1.7	20I (Alpha, V1)	2021-04-06	Europe	Germany	Thuringia		hohenleuben	7958	50.7098	12.052	29884	890
6166ba5b81e18c1c41ceced0	1050197525	IIMK	ncov	Human	B.1.1.7	20I (Alpha, V1)	2021-04-07	Europe	Germany	Thuringia		gera	7549	50.8753	12.0788	29898	1439
6166ba5b81e18c1c41ceced2	1050197996	IIMK	ncov	Human	B.1.1.7	20I (Alpha, V1)	2021-04-07	Europe	Germany	Thuringia		gera	7552	50.8753	12.0788	29884	1043
6166ba5b81e18c1c41ceced6	1091317509	IIMK	ncov	Human	B.1.1.7	20I (Alpha, V1)	2021-04-05	Europe	Germany	Thuringia		arnstadt	99310	50.8343	10.9456	29884	77
6166ba5b81e18c1c41ceced7	1091317522	IIMK	ncov	Human	B.1.1.7	20I (Alpha, V1)	2021-04-05	Europe	Germany	Thuringia		arnstadt	99310	50.8343	10.9456	29884	79
6166ba5b81e18c1c41cecedd	1091318544	IIMK	ncov	Human	B.1.1.7	20I (Alpha, V1)	2021-04-06	Europe	Germany	Thuringia		heiligenstadt	37308	51.378	10.1376	29884	53
6166ba5b81e18c1c41cecede	1091318561	IIMK	ncov	Human	B.1.1.7	20I (Alpha, V1)	2021-04-07	Europe	Germany	Thuringia		weimar	99423	50.9803	11.3272	29884	261
6166ba5b81e18c1c41cecee0	1091318601	IIMK	ncov	Human	B.1.1.7	20I (Alpha, V1)	2021-04-07	Europe	Germany	Thuringia		arnstadt	99310	50.8343	10.9456	29884	81
6166ba5b81e18c1c41cecee1	1091318608	IIMK	ncov	Human	B.1.1.7	20I (Alpha, V1)	2021-04-06	Europe	Germany	Thuringia		arnstadt	99310	50.8343	10.9456	29884	95
6166ba5b81e18c1c41cecee3	1091318620	IIMK	ncov	Human	B.1.1.7	20I (Alpha, V1)	2021-04-06	Europe	Germany	Thuringia		arnstadt	99310	50.8343	10.9456	29884	75
6166ba5b81e18c1c41cecee6	1091318668	IIMK	ncov	Human	B.1.1.7	20I (Alpha, V1)	2021-04-07	Europe	Germany	Thuringia		arnstadt	99310	50.8343	10.9456	29884	435
6166ba5b81e18c1c41cecee8	1091318675	IIMK	ncov	Human	B.1.1.7	20I (Alpha, V1)	2021-04-07	Europe	Germany	Thuringia		arnstadt	99310	50.8343	10.9456	29884	88
6166ba5b81e18c1c41cecef1	1091319679	IIMK	ncov	Human	B.1.1.7	20I (Alpha, V1)	2021-04-07	Europe	Germany	Thuringia		weimar	99423	50.9803	11.3272	29884	741
6166ba5b81e18c1c41cecef6	1091319706	IIMK	ncov	Human	B.1.1.7	20I (Alpha, V1)	2021-04-07	Europe	Germany	Thuringia		weimar	99423	50.9803	11.3272	29884	777
6166ba5b81e18c1c41cecef8	1091319930	IIMK	ncov	Human	B.1.1.7	20I (Alpha, V1)	2021-04-07	Europe	Germany	Thuringia		arnstadt	99310	50.8343	10.9456	29877	1077
6166ba5b81e18c1c41cecf05	1091320312	IIMK	ncov	Human	B.1.1.7	20I (Alpha, V1)	2021-04-08	Europe	Germany	Thuringia		nordhausen	99734	51.4946	10.7878	29884	820
6166ba5b81e18c1c41cecf0e	1000421375	IIMK	ncov	Human	B.1.1.7	20I (Alpha, V1)	2021-04-07	Europe	Germany	Thuringia		erfurt	99084	50.9775	11.0251	29884	210
6166ba5b81e18c1c41cecf12	1024083395	IIMK	ncov	Human	B.1.1.7	20I (Alpha, V1)	2021-04-07	Europe	Germany	Thuringia		sondershausen	99706	51.3677	10.8675	29884	673
6166ba5b81e18c1c41cecf15	1024550719	IIMK	ncov	Human	B.1.1.7	20I (Alpha, V1)	2021-04-07	Europe	Germany	Thuringia		weißensee	99631	51.1985	11.0665	29884	86
6166ba5b81e18c1c41cecf16	1024550721	IIMK	ncov	Human	B.1.1.7	20I (Alpha, V1)	2021-04-07	Europe	Germany	Thuringia		weißensee	99631	51.1985	11.0665	29884	82
6166ba5b81e18c1c41cecf19	1024550735	IIMK	ncov	Human	B.1.1.7	20I (Alpha, V1)	2021-04-08	Europe	Germany	Thuringia		sömmerda	99610	51.1627	11.1157	29884	59
6166ba5b81e18c1c41cecf1a	1024550753	IIMK	ncov	Human	B.1.1.7	20I (Alpha, V1)	2021-04-08	Europe	Germany	Thuringia		gebesee	99189	51.1158	10.9314	29880	85
6166ba5b81e18c1c41cecf1e	1024586900	IIMK	ncov	Human	B.1.1.7	20I (Alpha, V1)	2021-04-07	Europe	Germany	Thuringia		worbis	37339	51.4188	10.3625	29884	204
6166ba5b81e18c1c41cecf23	1024586933	IIMK	ncov	Human	B.1.1.7	20I (Alpha, V1)	2021-04-07	Europe	Germany	Thuringia		leinefelde	37327	51.3887	10.3268	29884	239
6166ba5b81e18c1c41cecf27	1024625486	IIMK	ncov	Human	B.1.1.7	20I (Alpha, V1)	2021-04-07	Europe	Germany	Thuringia		dreigleichen	99869	50.8916	10.8103	29884	90
6166ba5b81e18c1c41cecf33	1024625746	IIMK	ncov	Human	B.1.1.7	20I (Alpha, V1)	2021-04-08	Europe	Germany	Thuringia		nesse-apfelstädt	99192	50.921	10.9039	29877	76
6166ba5b81e18c1c41cecf39	1025082652	IIMK	ncov	Human	B.1.1.7	20I (Alpha, V1)	2021-04-08	Europe	Germany	Thuringia		stadtroda	7646	50.86	11.7281	29884	72
6166ba5b81e18c1c41cecf3b	1027540970	IIMK	ncov	Human	B.1.1.7	20I (Alpha, V1)	2021-04-08	Europe	Germany	Thuringia		stadtroda	7646	50.86	11.7281	29884	54
6166ba5b81e18c1c41cecf3d	1027540972	IIMK	ncov	Human	B.1.1.7	20I (Alpha, V1)	2021-04-08	Europe	Germany	Thuringia		stadtroda	7646	50.86	11.7281	29884	67
6166ba5b81e18c1c41cecf3e	1027540989	IIMK	ncov	Human	B.1.1.7	20I (Alpha, V1)	2021-04-08	Europe	Germany	Thuringia		bürgel	7616	50.9422	11.7571	29884	56
6166ba5b81e18c1c41cecf40	1027790031	IIMK	ncov	Human	B.1.1.7	20I (Alpha, V1)	2021-04-08	Europe	Germany	Thuringia		jena	7743	50.9283	11.5853	29884	43
6166ba5b81e18c1c41cecf42	1028301416	IIMK	ncov	Human	B.1.1.7	20I (Alpha, V1)	2021-04-07	Europe	Germany	Thuringia		sondershausen	99706	51.3677	10.8675	29884	595
6166ba5b81e18c1c41cecf47	1050198247	IIMK	ncov	Human	B.1.1.7	20I (Alpha, V1)	2021-04-07	Europe	Germany	Thuringia		gera	7548	50.8753	12.0788	29884	266
6166ba5b81e18c1c41cecf4d	1050199282	IIMK	ncov	Human	B.1.1.7	20I (Alpha, V1)	2021-04-08	Europe	Germany	Thuringia		langenwetzendorf	7957	50.6799	12.095	29884	193
6166ba5b81e18c1c41cecf51	1091319731	IIMK	ncov	Human	B.1.1.7	20I (Alpha, V1)	2021-04-07	Europe	Germany	Thuringia		arnstadt	99310	50.8343	10.9456	29884	269
6166ba5b81e18c1c41cecf53	1091320030	IIMK	ncov	Human	B.1.1.7	20I (Alpha, V1)	2021-04-07	Europe	Germany	Thuringia		arnstadt	99310	50.8343	10.9456	29884	209
6166ba5b81e18c1c41cecf54	1091320104	IIMK	ncov	Human	B.1.1.7	20I (Alpha, V1)	2021-04-07	Europe	Germany	Thuringia		arnstadt	99310	50.8343	10.9456	29884	77
6166ba5b81e18c1c41cecf57	1091320121	IIMK	ncov	Human	B.1.1.7	20I (Alpha, V1)	2021-04-07	Europe	Germany	Thuringia		arnstadt	99310	50.8343	10.9456	29884	200
6166ba5b81e18c1c41cecf59	1091320159	IIMK	ncov	Human	B.1.1.7	20I (Alpha, V1)	2021-04-07	Europe	Germany	Thuringia		bad langensalza	99947	51.1089	10.6475	29884	138
6166ba5b81e18c1c41cecf5a	1091320162	IIMK	ncov	Human	B.1.1.7	20I (Alpha, V1)	2021-04-07	Europe	Germany	Thuringia		mühlhausen	99974	51.2088	10.459	29884	772
6166ba5b81e18c1c41cecf5d	1091320201	IIMK	ncov	Human	B.1.1.7	20I (Alpha, V1)	2021-04-07	Europe	Germany	Thuringia		rodeberg	99976	51.2479	10.3519	29884	50
6166ba5b81e18c1c41cecf5e	1091320484	IIMK	ncov	Human	B.1.1.7	20I (Alpha, V1)	2021-04-08	Europe	Germany	Thuringia		jena	7749	50.9283	11.5853	29884	59
6166ba5b81e18c1c41cecf61	1091320989	IIMK	ncov	Human	B.1.1.7	20I (Alpha, V1)	2021-04-08	Europe	Germany	Thuringia		worbis	37339	51.4188	10.3625	29884	81
6166ba5b81e18c1c41cecf64	1091320998	IIMK	ncov	Human	B.1.1.7	20I (Alpha, V1)	2021-04-08	Europe	Germany	Thuringia		weimar	99423	50.9803	11.3272	29884	67
6166ba5b81e18c1c41cecf6b	1091321149	IIMK	ncov	Human	B.1.1.7	20I (Alpha, V1)	2021-04-08	Europe	Germany	Thuringia		arnstadt	99310	50.8343	10.9456	29884	172
6166ba5b81e18c1c41cecf6d	1091321179	IIMK	ncov	Human	B.1.1.7	20I (Alpha, V1)	2021-04-08	Europe	Germany	Thuringia		arnstadt	99310	50.8343	10.9456	29884	66
6166ba5b81e18c1c41cece9f	1024586932	IIMK	ncov	Human	B.1.1.7	20I (Alpha, V1)	2021-04-07	Europe	Germany	Thuringia		leinefelde	37327	51.3887	10.3268	29884	869
6166ba5b81e18c1c41cecea1	1024625384	IIMK	ncov	Human	B.1.1.7	20I (Alpha, V1)	2021-04-07	Europe	Germany	Thuringia		friedrichroda	99894	50.8575	10.5651	29884	879
6166ba5b81e18c1c41cecea6	1024625442	IIMK	ncov	Human	B.1.1.7	20I (Alpha, V1)	2021-04-07	Europe	Germany	Thuringia		georgenthal/thür.wald	99887	50.8321	10.6627	29884	73
6166ba5b81e18c1c41ceceab	1024625466	IIMK	ncov	Human	B.1.1.7	20I (Alpha, V1)	2021-04-07	Europe	Germany	Thuringia		georgenthal/thür.wald	99887	50.8321	10.6627	29884	80
6166ba5b81e18c1c41ceceb1	1024626356	IIMK	ncov	Human	B.1.1.7	20I (Alpha, V1)	2021-04-07	Europe	Germany	Thuringia		gotha	99867	50.9461	10.6962	29884	858
6166ba5b81e18c1c41ceceb5	1024626386	IIMK	ncov	Human	B.1.1.7	20I (Alpha, V1)	2021-04-08	Europe	Germany	Thuringia		gotha	99867	50.9461	10.6962	29884	1016
6166ba5b81e18c1c41ceceb6	1025082628	IIMK	ncov	Human	B.1.1.7	20I (Alpha, V1)	2021-04-07	Europe	Germany	Thuringia		bürgel	7616	50.9422	11.7571	29884	211
6166ba5b81e18c1c41ceceb7	1025082634	IIMK	ncov	Human	B.1.1.7	20I (Alpha, V1)	2021-04-07	Europe	Germany	Thuringia		schkölen	7619	51.0417	11.8214	29884	84
6166ba5b81e18c1c41cecec2	1027790036	IIMK	ncov	Human	B.1.1.7	20I (Alpha, V1)	2021-04-07	Europe	Germany	Thuringia		stadtroda	7646	50.86	11.7281	29884	766
6166ba5b81e18c1c41cecec4	1028090080	IIMK	ncov	Human	B.1.1.7	20I (Alpha, V1)	2021-04-05	Europe	Germany	Thuringia		jena	7743	50.9283	11.5853	29884	1159
6166ba5b81e18c1c41cecec8	1028300951	IIMK	ncov	Human	B.1.1.7	20I (Alpha, V1)	2021-04-07	Europe	Germany	Thuringia		sondershausen	99706	51.3677	10.8675	29884	75
6166ba5b81e18c1c41cecece	1050196987	IIMK	ncov	Human	B.1.1.7	20I (Alpha, V1)	2021-04-06	Europe	Germany	Thuringia		gera	7548	50.8753	12.0788	29884	245
6166ba5b81e18c1c41cececf	1050197077	IIMK	ncov	Human	B.1.1.7	20I (Alpha, V1)	2021-04-07	Europe	Germany	Thuringia		brahmenau	7554	50.9222	12.16	29884	144
6166ba5b81e18c1c41ceced1	1050197582	IIMK	ncov	Human	B.1.1.7	20I (Alpha, V1)	2021-04-07	Europe	Germany	Thuringia		gera	7551	50.8753	12.0788	29884	263
6166ba5b81e18c1c41ceced3	1050198085	IIMK	ncov	Human	B.1.1.7	20I (Alpha, V1)	2021-04-07	Europe	Germany	Thuringia		gera	7549	50.8753	12.0788	29884	1105
6166ba5b81e18c1c41ceced4	1060906169	IIMK	ncov	Human	B.1.1.7	20I (Alpha, V1)	2021-04-07	Europe	Germany	Thuringia		stadtroda	7646	50.86	11.7281	29884	982
6166ba5b81e18c1c41ceced5	1091317506	IIMK	ncov	Human	B.1.1.7	20I (Alpha, V1)	2021-04-05	Europe	Germany	Thuringia		arnstadt	99310	50.8343	10.9456	29884	191
6166ba5b81e18c1c41ceced8	1091317564	IIMK	ncov	Human	B.1.1.7	20I (Alpha, V1)	2021-04-05	Europe	Germany	Thuringia		arnstadt	99310	50.8343	10.9456	29887	68
6166ba5b81e18c1c41ceced9	1091317573	IIMK	ncov	Human	B.1.1.7	20I (Alpha, V1)	2021-04-05	Europe	Germany	Thuringia		arnstadt	99310	50.8343	10.9456	29884	248
6166ba5b81e18c1c41ceceda	1091317599	IIMK	ncov	Human	B.1.1.7	20I (Alpha, V1)	2021-04-05	Europe	Germany	Thuringia		arnstadt	99310	50.8343	10.9456	29884	313
6166ba5b81e18c1c41cecee4	1091318646	IIMK	ncov	Human	B.1.1.7	20I (Alpha, V1)	2021-04-06	Europe	Germany	Thuringia		arnstadt	99310	50.8343	10.9456	29884	74
6166ba5b81e18c1c41ceceeb	1091318763	IIMK	ncov	Human	B.1.1.7	20I (Alpha, V1)	2021-04-07	Europe	Germany	Thuringia		arnstadt	99310	50.8343	10.9456	29884	83
6166ba5b81e18c1c41ceceec	1091318858	IIMK	ncov	Human	B.1.1.7	20I (Alpha, V1)	2021-04-07	Europe	Germany	Thuringia		arnstadt	99310	50.8343	10.9456	29884	1407
6166ba5b81e18c1c41cecef3	1091319694	IIMK	ncov	Human	B.1.1.7	20I (Alpha, V1)	2021-04-07	Europe	Germany	Thuringia		weimar	99423	50.9803	11.3272	29884	818
6166ba5b81e18c1c41cecefa	1091319999	IIMK	ncov	Human	B.1.1.7	20I (Alpha, V1)	2021-04-07	Europe	Germany	Thuringia		arnstadt	99310	50.8343	10.9456	29884	597
6166ba5b81e18c1c41cecf04	1091320199	IIMK	ncov	Human	B.1.1.7	20I (Alpha, V1)	2021-04-07	Europe	Germany	Thuringia		rodeberg	99976	51.2479	10.3519	29884	1470
6166ba5b81e18c1c41cecf0c	1091320324	IIMK	ncov	Human	B.1.1.7	20I (Alpha, V1)	2021-04-08	Europe	Germany	Thuringia		erfurt	99096	50.9775	11.0251	29884	973
6166ba5b81e18c1c41cecf0d	1000421374	IIMK	ncov	Human	B.1.1.7	20I (Alpha, V1)	2021-04-07	Europe	Germany	Thuringia		erfurt	99084	50.9775	11.0251	29861	285
6166ba5b81e18c1c41cecf10	1004352070	IIMK	ncov	Human	B.1.1.7	20I (Alpha, V1)	2021-04-08	Europe	Germany	Thuringia		gera	7549	50.8753	12.0788	29884	46
6166ba5b81e18c1c41cecf11	1010525205	IIMK	ncov	Human	B.1.1.7	20I (Alpha, V1)	2021-04-07	Europe	Germany	Thuringia		stadtroda	7646	50.86	11.7281	29884	78
6166ba5b81e18c1c41cecf1c	1024586897	IIMK	ncov	Human	B.1.1.7	20I (Alpha, V1)	2021-04-07	Europe	Germany	Thuringia		jena	7747	50.9283	11.5853	29880	1121
6166ba5b81e18c1c41cecf1f	1024586909	IIMK	ncov	Human	B.1.1.7	20I (Alpha, V1)	2021-04-07	Europe	Germany	Thuringia		niederorschel	37355	51.3722	10.4237	29884	368
6166ba5b81e18c1c41cece99	1024586886	IIMK	ncov	Human	B.1.1.7	20I (Alpha, V1)	2021-04-07	Europe	Germany	Thuringia		leinefelde	37327	51.3887	10.3268	29884	1170
6166ba5b81e18c1c41cecf22	1024586923	IIMK	ncov	Human	B.1.1.7	20I (Alpha, V1)	2021-04-07	Europe	Germany	Thuringia		worbis	37339	51.4188	10.3625	29884	939
6166ba5b81e18c1c41cecf25	1024586979	IIMK	ncov	Human	B.1.1.7	20I (Alpha, V1)	2021-04-08	Europe	Germany	Thuringia		heiligenstadt	37308	51.378	10.1376	29884	28
6166ba5b81e18c1c41cecf26	1024625484	IIMK	ncov	Human	B.1.1.7	20I (Alpha, V1)	2021-04-07	Europe	Germany	Thuringia		georgenthal/thür.wald	99887	50.8321	10.6627	29884	269
6166ba5b81e18c1c41cecf28	1024625490	IIMK	ncov	Human	B.1.1.7	20I (Alpha, V1)	2021-04-07	Europe	Germany	Thuringia		gotha	99867	50.9461	10.6962	29880	660
6166ba5b81e18c1c41cecf29	1024625492	IIMK	ncov	Human	B.1.1.7	20I (Alpha, V1)	2021-04-07	Europe	Germany	Thuringia		georgenthal/thür.wald	99887	50.8321	10.6627	29884	465
6166ba5b81e18c1c41cecf2b	1024625708	IIMK	ncov	Human	B.1.1.7	20I (Alpha, V1)	2021-04-08	Europe	Germany	Thuringia		tambach-dietharz	99897	50.7925	10.6157	29883	229
6166ba5b81e18c1c41cecf2e	1024625729	IIMK	ncov	Human	B.1.1.7	20I (Alpha, V1)	2021-04-08	Europe	Germany	Thuringia		waltershausen	99880	50.8998	10.5563	29884	66
6166ba5b81e18c1c41cecf37	1024625765	IIMK	ncov	Human	B.1.1.7	20I (Alpha, V1)	2021-04-08	Europe	Germany	Thuringia		dreigleichen	99869	50.8916	10.8103	29884	55
6166ba5b81e18c1c41cecf3c	1027540971	IIMK	ncov	Human	B.1.1.7	20I (Alpha, V1)	2021-04-08	Europe	Germany	Thuringia		stadtroda	7646	50.86	11.7281	29884	29
6166ba5b81e18c1c41cecf45	1050197817	IIMK	ncov	Human	B.1.1.7	20I (Alpha, V1)	2021-04-07	Europe	Germany	Thuringia		rudolstadt	7407	50.7193	11.34	29884	1261
6166ba5b81e18c1c41cecf4c	1050199192	IIMK	ncov	Human	B.1.1.7	20I (Alpha, V1)	2021-04-08	Europe	Germany	Thuringia		gera	7548	50.8753	12.0788	29884	203
6166ba5b81e18c1c41cecf4f	1091319712	IIMK	ncov	Human	B.1.1.7	20I (Alpha, V1)	2021-04-07	Europe	Germany	Thuringia		arnstadt	99310	50.8343	10.9456	29884	117
6166ba5b81e18c1c41cecf55	1091320116	IIMK	ncov	Human	B.1.1.7	20I (Alpha, V1)	2021-04-07	Europe	Germany	Thuringia		arnstadt	99310	50.8343	10.9456	29884	51
6166ba5b81e18c1c41cecf5c	1091320187	IIMK	ncov	Human	B.1.1.7	20I (Alpha, V1)	2021-04-07	Europe	Germany	Thuringia		mühlhausen	99974	51.2088	10.459	29884	64
6166ba5b81e18c1c41cecf63	1091320994	IIMK	ncov	Human	B.1.1.7	20I (Alpha, V1)	2021-04-08	Europe	Germany	Thuringia		weimar	99423	50.9803	11.3272	29884	361
6166ba5b81e18c1c41cecf66	1091321031	IIMK	ncov	Human	B.1.1.7	20I (Alpha, V1)	2021-04-08	Europe	Germany	Thuringia		rodeberg	99976	51.2479	10.3519	29884	83
6166ba5b81e18c1c41cecf68	1091321044	IIMK	ncov	Human	B.1.1.7	20I (Alpha, V1)	2021-04-08	Europe	Germany	Thuringia		mühlhausen	99961	51.2088	10.459	29884	69
6166ba5b81e18c1c41cecf6a	1091321111	IIMK	ncov	Human	B.1.1.7	20I (Alpha, V1)	2021-04-08	Europe	Germany	Thuringia		arnstadt	99310	50.8343	10.9456	29884	84
6166ba5b81e18c1c41cecf6e	1091321186	IIMK	ncov	Human	B.1.1.7	20I (Alpha, V1)	2021-04-08	Europe	Germany	Thuringia		arnstadt	99310	50.8343	10.9456	29884	76
6166ba5b81e18c1c41cecea0	1024625360	IIMK	ncov	Human	B.1.1.7	20I (Alpha, V1)	2021-04-07	Europe	Germany	Thuringia		waltershausen	99880	50.8998	10.5563	29884	170
6166ba5b81e18c1c41ceceac	1024625469	IIMK	ncov	Human	B.1.1.7	20I (Alpha, V1)	2021-04-08	Europe	Germany	Thuringia		dreigleichen	99869	50.8916	10.8103	29884	1429
6166ba5b81e18c1c41cecead	1024625470	IIMK	ncov	Human	B.1.1.7	20I (Alpha, V1)	2021-04-08	Europe	Germany	Thuringia		gotha	99867	50.9461	10.6962	29884	1036
6166ba5b81e18c1c41ceceaf	1024625681	IIMK	ncov	Human	B.1.1.7	20I (Alpha, V1)	2021-04-07	Europe	Germany	Thuringia		gotha	99867	50.9461	10.6962	29883	92
6166ba5b81e18c1c41ceceba	1027540796	IIMK	ncov	Human	B.1.1.7	20I (Alpha, V1)	2021-04-05	Europe	Germany	Thuringia		kahla	7768	50.802	11.5882	29880	373
6166ba5b81e18c1c41cecebb	1027540798	IIMK	ncov	Human	B.1.1.7	20I (Alpha, V1)	2021-04-05	Europe	Germany	Thuringia		stadtroda	7646	50.86	11.7281	29884	247
6166ba5b81e18c1c41cecebe	1027540867	IIMK	ncov	Human	B.1.1.7	20I (Alpha, V1)	2021-04-07	Europe	Germany	Thuringia		crossen	7613	50.9646	11.984	29880	1368
6166ba5b81e18c1c41cecebf	1027540869	IIMK	ncov	Human	B.1.1.7	20I (Alpha, V1)	2021-04-07	Europe	Germany	Thuringia		camburg	7774	51.0514	11.7055	29884	163
6166ba5b81e18c1c41cecec5	1028090084	IIMK	ncov	Human	B.1.1.7	20I (Alpha, V1)	2021-04-05	Europe	Germany	Thuringia		jena	7703	50.9283	11.5853	29884	153
6166ba5b81e18c1c41cecec6	1028090085	IIMK	ncov	Human	B.1.1.7	20I (Alpha, V1)	2021-04-05	Europe	Germany	Thuringia		jena	7703	50.9283	11.5853	29880	719
6166ba5b81e18c1c41cecec9	1028300953	IIMK	ncov	Human	B.1.1.7	20I (Alpha, V1)	2021-04-07	Europe	Germany	Thuringia		sondershausen	99706	51.3677	10.8675	29884	1178
6166ba5b81e18c1c41cececa	1028301441	IIMK	ncov	Human	B.1.1.7	20I (Alpha, V1)	2021-04-07	Europe	Germany	Thuringia		sondershausen	99706	51.3677	10.8675	29884	129
6166ba5b81e18c1c41cececb	1028301444	IIMK	ncov	Human	B.1.1.7	20I (Alpha, V1)	2021-04-07	Europe	Germany	Thuringia		ebeleben	99713	51.2847	10.7319	29880	213
6166ba5b81e18c1c41cecedc	1091318542	IIMK	ncov	Human	B.1.1.7	20I (Alpha, V1)	2021-04-06	Europe	Germany	Thuringia		heiligenstadt	37308	51.378	10.1376	29884	84
6166ba5b81e18c1c41cecee9	1091318701	IIMK	ncov	Human	B.1.1.7	20I (Alpha, V1)	2021-04-07	Europe	Germany	Thuringia		arnstadt	99310	50.8343	10.9456	29884	80
6166ba5b81e18c1c41ceceed	1091318862	IIMK	ncov	Human	B.1.1.7	20I (Alpha, V1)	2021-04-07	Europe	Germany	Thuringia		jena	7743	50.9283	11.5853	29884	820
6166ba5b81e18c1c41ceceee	1091318863	IIMK	ncov	Human	B.1.1.7	20I (Alpha, V1)	2021-04-07	Europe	Germany	Thuringia		jena	7743	50.9283	11.5853	29884	309
6166ba5b81e18c1c41ceceef	1091319615	IIMK	ncov	Human	B.1.1.7	20I (Alpha, V1)	2021-04-07	Europe	Germany	Thuringia		jena	7743	50.9283	11.5853	29884	843
6166ba5b81e18c1c41cecef4	1091319695	IIMK	ncov	Human	B.1.1.7	20I (Alpha, V1)	2021-04-07	Europe	Germany	Thuringia		weimar	99423	50.9803	11.3272	29884	680
6166ba5b81e18c1c41cecef5	1091319697	IIMK	ncov	Human	B.1.1.7	20I (Alpha, V1)	2021-04-07	Europe	Germany	Thuringia		weimar	99423	50.9803	11.3272	29884	1095
6166ba5b81e18c1c41cecef7	1091319885	IIMK	ncov	Human	B.1.1.7	20I (Alpha, V1)	2021-04-07	Europe	Germany	Thuringia		arnstadt	99310	50.8343	10.9456	29893	565
6166ba5b81e18c1c41cecefc	1091320026	IIMK	ncov	Human	B.1.1.7	20I (Alpha, V1)	2021-04-07	Europe	Germany	Thuringia		arnstadt	99310	50.8343	10.9456	29884	389
6166ba5b81e18c1c41cecefe	1091320107	IIMK	ncov	Human	B.1.1.7	20I (Alpha, V1)	2021-04-07	Europe	Germany	Thuringia		heiligenstadt	37308	51.378	10.1376	29884	725
6166ba5b81e18c1c41cecf01	1091320158	IIMK	ncov	Human	B.1.1.7	20I (Alpha, V1)	2021-04-07	Europe	Germany	Thuringia		mühlhausen	99974	51.2088	10.459	29884	365
6166ba5b81e18c1c41cecf02	1091320167	IIMK	ncov	Human	B.1.1.7	20I (Alpha, V1)	2021-04-07	Europe	Germany	Thuringia		bad langensalza	99947	51.1089	10.6475	29884	689
6166ba5b81e18c1c41cecf0b	1091320322	IIMK	ncov	Human	B.1.1.7	20I (Alpha, V1)	2021-04-08	Europe	Germany	Thuringia		erfurt	99096	50.9775	11.0251	29884	1043
6166ba5b81e18c1c41cecf14	1024550714	IIMK	ncov	Human	B.1.1.7	20I (Alpha, V1)	2021-04-07	Europe	Germany	Thuringia		sömmerda	99610	51.1627	11.1157	29884	96
6166ba5b81e18c1c41cecf17	1024550724	IIMK	ncov	Human	B.1.1.7	20I (Alpha, V1)	2021-04-07	Europe	Germany	Thuringia		rastenberg	99636	51.1757	11.4201	29884	208
6166ba5b81e18c1c41cecf20	1024586911	IIMK	ncov	Human	B.1.1.7	20I (Alpha, V1)	2021-04-07	Europe	Germany	Thuringia		niederorschel	37355	51.3722	10.4237	29884	143
6166ba5b81e18c1c41cecf21	1024586918	IIMK	ncov	Human	B.1.1.7	20I (Alpha, V1)	2021-04-07	Europe	Germany	Thuringia		arenshausen	37318	51.3624	10.0721	29884	245
6166ba5b81e18c1c41cecf32	1024625742	IIMK	ncov	Human	B.1.1.7	20I (Alpha, V1)	2021-04-08	Europe	Germany	Thuringia		waltershausen	99880	50.8998	10.5563	29884	70
6166ba5b81e18c1c41cecf34	1024625755	IIMK	ncov	Human	B.1.1.7	20I (Alpha, V1)	2021-04-08	Europe	Germany	Thuringia		dreigleichen	99869	50.8916	10.8103	29884	71
6166ba5b81e18c1c41cecf35	1024625758	IIMK	ncov	Human	B.1.1.7	20I (Alpha, V1)	2021-04-08	Europe	Germany	Thuringia		nesse-apfelstädt	99192	50.921	10.9039	29884	274
6166ba5b81e18c1c41cecf3a	1027540969	IIMK	ncov	Human	B.1.1.7	20I (Alpha, V1)	2021-04-08	Europe	Germany	Thuringia		bürgel	7616	50.9422	11.7571	29884	71
6166ba5b81e18c1c41cecf41	1027790041	IIMK	ncov	Human	B.1.1.7	20I (Alpha, V1)	2021-04-08	Europe	Germany	Thuringia		eisenberg	7607	50.9689	11.8964	29884	83
6166ba5b81e18c1c41cecf44	1050197161	IIMK	ncov	Human	B.1.1.7	20I (Alpha, V1)	2021-04-08	Europe	Germany	Thuringia		gera	7549	50.8753	12.0788	29884	162
6166ba5b81e18c1c41cecf48	1050198337	IIMK	ncov	Human	B.1.1.7	20I (Alpha, V1)	2021-04-08	Europe	Germany	Thuringia		gera	7551	50.8753	12.0788	29884	213
6166ba5b81e18c1c41cecf50	1091319718	IIMK	ncov	Human	B.1.1.7	20I (Alpha, V1)	2021-04-07	Europe	Germany	Thuringia		arnstadt	99310	50.8343	10.9456	29884	268
6166ba5b81e18c1c41cecf56	1091320119	IIMK	ncov	Human	B.1.1.7	20I (Alpha, V1)	2021-04-07	Europe	Germany	Thuringia		arnstadt	99310	50.8343	10.9456	29884	35
6166ba5b81e18c1c41cecf58	1091320153	IIMK	ncov	Human	B.1.1.7	20I (Alpha, V1)	2021-04-07	Europe	Germany	Thuringia		mühlhausen	99974	51.2088	10.459	29884	395
6166ba5b81e18c1c41cecf5b	1091320178	IIMK	ncov	Human	B.1.1.7	20I (Alpha, V1)	2021-04-07	Europe	Germany	Thuringia		mühlhausen	99974	51.2088	10.459	29884	259
6166ba5b81e18c1c41cecf67	1091321033	IIMK	ncov	Human	B.1.1.7	20I (Alpha, V1)	2021-04-08	Europe	Germany	Thuringia		mühlhausen	99974	51.2088	10.459	29884	44
6166ba5b81e18c1c41cecf6c	1091321157	IIMK	ncov	Human	B.1.1.7	20I (Alpha, V1)	2021-04-08	Europe	Germany	Thuringia		arnstadt	99310	50.8343	10.9456	29884	210
6166ba5b81e18c1c41cecf6f	1091321402	IIMK	ncov	Human	B.1.1.7	20I (Alpha, V1)	2021-04-08	Europe	Germany	Thuringia		jena	7743	50.9283	11.5853	29884	49
6166ba5b81e18c1c41cecf70	1091321409	IIMK	ncov	Human	B.1.1.7	20I (Alpha, V1)	2021-04-08	Europe	Germany	Thuringia		arnstadt	99310	50.8343	10.9456	29884	79
6166ba5b81e18c1c41cecf71	1091321410	IIMK	ncov	Human	B.1.1.7	20I (Alpha, V1)	2021-04-08	Europe	Germany	Thuringia		arnstadt	99310	50.8343	10.9456	29884	65
6166ba5b81e18c1c41cecf72	1091321424	IIMK	ncov	Human	B.1.1.7	20I (Alpha, V1)	2021-04-08	Europe	Germany	Thuringia		arnstadt	99310	50.8343	10.9456	29884	127
6166ba5b81e18c1c41cecf73	1091321436	IIMK	ncov	Human	B.1.1.7	20I (Alpha, V1)	2021-04-08	Europe	Germany	Thuringia		arnstadt	99310	50.8343	10.9456	29884	48
6166ba5b81e18c1c41cecf77	1091321472	IIMK	ncov	Human	B.1.1.7	20I (Alpha, V1)	2021-04-08	Europe	Germany	Thuringia		arnstadt	99310	50.8343	10.9456	29884	68
6166ba5b81e18c1c41cecf79	1091321617	IIMK	ncov	Human	B.1.1.7	20I (Alpha, V1)	2021-04-09	Europe	Germany	Thuringia		bad frankenhausen	6567	51.3557	11.0986	29884	1182
6166ba5b81e18c1c41cecf84	1024471112	IIMK	ncov	Human	B.1.1.7	20I (Alpha, V1)	2021-04-09	Europe	Germany	Thuringia		barchfeld	36456	50.8283	11.1816	29884	82
6166ba5b81e18c1c41cecf88	1024471123	IIMK	ncov	Human	B.1.1.7	20I (Alpha, V1)	2021-04-09	Europe	Germany	Thuringia		suhl	98527	50.609	10.6907	29884	53
6166ba5b81e18c1c41cecf8b	1024471128	IIMK	ncov	Human	B.1.1.7	20I (Alpha, V1)	2021-04-09	Europe	Germany	Thuringia		geisa	36419	50.7167	9.95024	29884	53
6166ba5b81e18c1c41cecf91	1024625749	IIMK	ncov	Human	B.1.1.7	20I (Alpha, V1)	2021-04-08	Europe	Germany	Thuringia		ohrdruf	99885	50.8288	10.7341	29884	149
6166ba5b81e18c1c41cecf92	1024625752	IIMK	ncov	Human	B.1.1.7	20I (Alpha, V1)	2021-04-08	Europe	Germany	Thuringia		ohrdruf	99885	50.8288	10.7341	29884	219
6166ba5b81e18c1c41cecf9d	1091320990	IIMK	ncov	Human	B.1.1.7	20I (Alpha, V1)	2021-04-08	Europe	Germany	Thuringia		worbis	37339	51.4188	10.3625	29884	405
6166ba5b81e18c1c41cecfa3	1091321078	IIMK	ncov	Human	B.1.1.7	20I (Alpha, V1)	2021-04-08	Europe	Germany	Thuringia		arnstadt	99310	50.8343	10.9456	29884	54
6166ba5b81e18c1c41cecfac	1000422882	IIMK	ncov	Human	B.1.1.7	20I (Alpha, V1)	2021-04-09	Europe	Germany	Thuringia		erfurt	99084	50.9775	11.0251	29884	64
6166ba5b81e18c1c41cecfb3	1024550756	IIMK	ncov	Human	B.1.1.7	20I (Alpha, V1)	2021-04-09	Europe	Germany	Thuringia		sömmerda	99610	51.1627	11.1157	29884	45
6166ba5b81e18c1c41cecfb6	1024550759	IIMK	ncov	Human	B.1.1.7	20I (Alpha, V1)	2021-04-09	Europe	Germany	Thuringia		sömmerda	99610	51.1627	11.1157	29884	89
6166ba5b81e18c1c41cecfb8	1024550761	IIMK	ncov	Human	B.1.1.7	20I (Alpha, V1)	2021-04-09	Europe	Germany	Thuringia		kindelbrück	99638	51.2617	11.09	29884	86
6166ba5b81e18c1c41cecfbb	1024550764	IIMK	ncov	Human	B.1.1.7	20I (Alpha, V1)	2021-04-09	Europe	Germany	Thuringia		rastenberg	99636	51.1757	11.4201	29884	429
6166ba5b81e18c1c41cecfc8	1024587060	IIMK	ncov	Human	B.1.1.7	20I (Alpha, V1)	2021-04-09	Europe	Germany	Thuringia		niederorschel	37355	51.3722	10.4237	29884	81
6166ba5b81e18c1c41cecfcb	1024587092	IIMK	ncov	Human	B.1.1.7	20I (Alpha, V1)	2021-04-09	Europe	Germany	Thuringia		dingelstädt	37351	51.3156	10.3215	29884	283
6166ba5b81e18c1c41cecfd3	1024625399	IIMK	ncov	Human	B.1.1.7	20I (Alpha, V1)	2021-04-07	Europe	Germany	Thuringia		gotha	99867	50.9461	10.6962	29884	83
6166ba5b81e18c1c41cecfd5	1024625404	IIMK	ncov	Human	B.1.1.7	20I (Alpha, V1)	2021-04-07	Europe	Germany	Thuringia		gotha	99867	50.9461	10.6962	29884	228
6166ba5b81e18c1c41cecfd6	1024625405	IIMK	ncov	Human	B.1.1.7	20I (Alpha, V1)	2021-04-07	Europe	Germany	Thuringia		gotha	99867	50.9461	10.6962	29880	99
6166ba5b81e18c1c41cecfd8	1024625413	IIMK	ncov	Human	B.1.1.7	20I (Alpha, V1)	2021-04-07	Europe	Germany	Thuringia		georgenthal/thür.wald	99887	50.8321	10.6627	29884	215
6166ba5b81e18c1c41cecfdc	1024625467	IIMK	ncov	Human	B.1.1.7	20I (Alpha, V1)	2021-04-07	Europe	Germany	Thuringia		georgenthal/thür.wald	99887	50.8321	10.6627	29884	96
6166ba5b81e18c1c41cecfdf	1024625712	IIMK	ncov	Human	B.1.1.7	20I (Alpha, V1)	2021-04-08	Europe	Germany	Thuringia		tambach-dietharz	99897	50.7925	10.6157	29883	618
6166ba5b81e18c1c41cecfe4	1024625771	IIMK	ncov	Human	B.1.1.7	20I (Alpha, V1)	2021-04-10	Europe	Germany	Thuringia		georgenthal/thür.wald	99887	50.8321	10.6627	29884	69
6166ba5b81e18c1c41cecfe9	1024625792	IIMK	ncov	Human	B.1.1.7	20I (Alpha, V1)	2021-04-10	Europe	Germany	Thuringia		waltershausen	99880	50.8998	10.5563	29884	86
6166ba5b81e18c1c41cecfed	1024626391	IIMK	ncov	Human	B.1.1.7	20I (Alpha, V1)	2021-04-10	Europe	Germany	Thuringia		gotha	99867	50.9461	10.6962	29884	124
6166ba5b81e18c1c41cecfef	1025082671	IIMK	ncov	Human	B.1.1.7	20I (Alpha, V1)	2021-04-09	Europe	Germany	Thuringia		stadtroda	7646	50.86	11.7281	29884	70
6166ba5b81e18c1c41cecff4	1028840008	IIMK	ncov	Human	B.1.1.7	20I (Alpha, V1)	2021-04-09	Europe	Germany	Thuringia		sondershausen	99706	51.3677	10.8675	29884	48
6166ba5b81e18c1c41cecff9	1091318651	IIMK	ncov	Human	B.1.1.7	20I (Alpha, V1)	2021-04-06	Europe	Germany	Thuringia		arnstadt	99310	50.8343	10.9456	29884	99
6166ba5b81e18c1c41cecffe	1091320139	IIMK	ncov	Human	B.1.1.7	20I (Alpha, V1)	2021-04-07	Europe	Germany	Thuringia		bad langensalza	99947	51.1089	10.6475	29884	188
6166ba5b81e18c1c41ced000	1091320992	IIMK	ncov	Human	B.1.1.7	20I (Alpha, V1)	2021-04-08	Europe	Germany	Thuringia		weimar	99423	50.9803	11.3272	29884	177
6166ba5b81e18c1c41ced005	1091321449	IIMK	ncov	Human	B.1.1.7	20I (Alpha, V1)	2021-04-08	Europe	Germany	Thuringia		arnstadt	99310	50.8343	10.9456	29884	686
6166ba5b81e18c1c41ced008	1091322276	IIMK	ncov	Human	B.1.1.7	20I (Alpha, V1)	2021-04-09	Europe	Germany	Thuringia		weimar	99423	50.9803	11.3272	29884	60
6166ba5b81e18c1c41ced00a	1091322291	IIMK	ncov	Human	B.1.1.7	20I (Alpha, V1)	2021-04-09	Europe	Germany	Thuringia		weimar	99423	50.9803	11.3272	29871	734
6166ba5b81e18c1c41ced00c	1091322309	IIMK	ncov	Human	B.1.1.7	20I (Alpha, V1)	2021-04-09	Europe	Germany	Thuringia		weimar	99423	50.9803	11.3272	29884	217
6166ba5b81e18c1c41ced013	1091322354	IIMK	ncov	Human	B.1.1.7	20I (Alpha, V1)	2021-04-09	Europe	Germany	Thuringia		arnstadt	99310	50.8343	10.9456	29884	84
6166ba5b81e18c1c41ced014	1091322390	IIMK	ncov	Human	B.1.1.7	20I (Alpha, V1)	2021-04-09	Europe	Germany	Thuringia		arnstadt	99310	50.8343	10.9456	29884	34
6166ba5b81e18c1c41ced015	1091322399	IIMK	ncov	Human	B.1.1.7	20I (Alpha, V1)	2021-04-09	Europe	Germany	Thuringia		arnstadt	99310	50.8343	10.9456	29884	72
6166ba5b81e18c1c41ced017	1091322423	IIMK	ncov	Human	B.1.1.7	20I (Alpha, V1)	2021-04-09	Europe	Germany	Thuringia		arnstadt	99310	50.8343	10.9456	29884	61
6166ba5b81e18c1c41ced01c	1091322611	IIMK	ncov	Human	B.1.1.7	20I (Alpha, V1)	2021-04-09	Europe	Germany	Thuringia		arnstadt	99310	50.8343	10.9456	29849	28
6166ba5b81e18c1c41ced01d	1091322626	IIMK	ncov	Human	B.1.1.7	20I (Alpha, V1)	2021-04-09	Europe	Germany	Thuringia		arnstadt	99310	50.8343	10.9456	29884	811
6166ba5b81e18c1c41ced020	1091322677	IIMK	ncov	Human	B.1.1.7	20I (Alpha, V1)	2021-04-09	Europe	Germany	Thuringia		bad langensalza	99947	51.1089	10.6475	29880	151
6166ba5b81e18c1c41ced029	1091323254	IIMK	ncov	Human	B.1.1.7	20I (Alpha, V1)	2021-04-11	Europe	Germany	Thuringia		weimar	99423	50.9803	11.3272	29884	83
6166ba5b81e18c1c41ced033	1011251025	IIMK	ncov	Human	B.1.1.7	20I (Alpha, V1)	2021-04-12	Europe	Germany	Thuringia		brahmenau	7554	50.9222	12.16	29787	811
6166ba5b81e18c1c41ced040	1024587178	IIMK	ncov	Human	B.1.1.7	20I (Alpha, V1)	2021-04-12	Europe	Germany	Thuringia		heiligenstadt	37308	51.378	10.1376	29792	676
6166ba5b81e18c1c41ced046	1024587212	IIMK	ncov	Human	B.1.1.7	20I (Alpha, V1)	2021-04-12	Europe	Germany	Thuringia		dingelstädt	37351	51.3156	10.3215	29797	376
6166ba5b81e18c1c41cecf76	1091321448	IIMK	ncov	Human	B.1.1.7	20I (Alpha, V1)	2021-04-08	Europe	Germany	Thuringia		arnstadt	99310	50.8343	10.9456	29884	121
6166ba5b81e18c1c41cecf78	1091321476	IIMK	ncov	Human	B.1.1.7	20I (Alpha, V1)	2021-04-08	Europe	Germany	Thuringia		arnstadt	99310	50.8343	10.9456	29884	171
6166ba5b81e18c1c41cecf7b	1091321621	IIMK	ncov	Human	B.1.1.7	20I (Alpha, V1)	2021-04-09	Europe	Germany	Thuringia		heldrungen	6577	51.2989	11.219	29884	1114
6166ba5b81e18c1c41cecf7d	1091321623	IIMK	ncov	Human	B.1.1.7	20I (Alpha, V1)	2021-04-09	Europe	Germany	Thuringia		erfurt	99092	50.9775	11.0251	29884	1146
6166ba5b81e18c1c41cecf80	1005223417	IIMK	ncov	Human	B.1.1.7	20I (Alpha, V1)	2021-04-08	Europe	Germany	Thuringia		bad köstritz	7586	50.9301	12.0118	29884	164
6166ba5b81e18c1c41cecf81	1010525218	IIMK	ncov	Human	B.1.1.7	20I (Alpha, V1)	2021-04-08	Europe	Germany	Thuringia		stadtroda	7646	50.86	11.7281	29884	41
6166ba5b81e18c1c41cecf86	1024471115	IIMK	ncov	Human	B.1.1.7	20I (Alpha, V1)	2021-04-09	Europe	Germany	Thuringia		unterbreizbach	36414	50.8172	9.97833	29884	100
6166ba5b81e18c1c41cecf8a	1024471127	IIMK	ncov	Human	B.1.1.7	20I (Alpha, V1)	2021-04-09	Europe	Germany	Thuringia		bad salzungen	36433	50.8117	10.2327	29884	89
6166ba5b81e18c1c41cecf8c	1024550734	IIMK	ncov	Human	B.1.1.7	20I (Alpha, V1)	2021-04-08	Europe	Germany	Thuringia		sömmerda	99610	51.1627	11.1157	29884	448
6166ba5b81e18c1c41cecf8f	1024625710	IIMK	ncov	Human	B.1.1.7	20I (Alpha, V1)	2021-04-08	Europe	Germany	Thuringia		tambach-dietharz	99897	50.7925	10.6157	29883	128
6166ba5b81e18c1c41cecf90	1024625726	IIMK	ncov	Human	B.1.1.7	20I (Alpha, V1)	2021-04-08	Europe	Germany	Thuringia		georgenthal/thür.wald	99887	50.8321	10.6627	29884	182
6166ba5b81e18c1c41cecf94	1024625762	IIMK	ncov	Human	B.1.1.7	20I (Alpha, V1)	2021-04-08	Europe	Germany	Thuringia		gotha	99867	50.9461	10.6962	29884	228
6166ba5b81e18c1c41cecf95	1024625766	IIMK	ncov	Human	B.1.1.7	20I (Alpha, V1)	2021-04-08	Europe	Germany	Thuringia		waltershausen	99880	50.8998	10.5563	29884	80
6166ba5b81e18c1c41cecf9a	1050199454	IIMK	ncov	Human	B.1.1.7	20I (Alpha, V1)	2021-04-08	Europe	Germany	Thuringia		gera	7548	50.8753	12.0788	29884	62
6166ba5b81e18c1c41cecf9e	1091321045	IIMK	ncov	Human	B.1.1.7	20I (Alpha, V1)	2021-04-08	Europe	Germany	Thuringia		körner	99998	51.1917	10525	29884	863
6166ba5b81e18c1c41cecfa1	1091321059	IIMK	ncov	Human	B.1.1.7	20I (Alpha, V1)	2021-04-08	Europe	Germany	Thuringia		arnstadt	99310	50.8343	10.9456	29884	102
6166ba5b81e18c1c41cecfa5	1091321263	IIMK	ncov	Human	B.1.1.7	20I (Alpha, V1)	2021-04-08	Europe	Germany	Thuringia		arnstadt	99310	50.8343	10.9456	29884	74
6166ba5b81e18c1c41cecfa9	1091321464	IIMK	ncov	Human	B.1.1.7	20I (Alpha, V1)	2021-04-08	Europe	Germany	Thuringia		arnstadt	99310	50.8343	10.9456	29885	1034
6166ba5b81e18c1c41cecfaa	1000421389	IIMK	ncov	Human	B.1.1.7	20I (Alpha, V1)	2021-04-09	Europe	Germany	Thuringia		erfurt	99084	50.9775	11.0251	29884	56
6166ba5b81e18c1c41cecfab	1000421393	IIMK	ncov	Human	B.1.1.7	20I (Alpha, V1)	2021-04-09	Europe	Germany	Thuringia		erfurt	99084	50.9775	11.0251	29884	65
6166ba5b81e18c1c41cecfb1	1024550743	IIMK	ncov	Human	B.1.1.7	20I (Alpha, V1)	2021-04-08	Europe	Germany	Thuringia		gebesee	99189	51.1158	10.9314	29884	144
6166ba5b81e18c1c41cecfb2	1024550755	IIMK	ncov	Human	B.1.1.7	20I (Alpha, V1)	2021-04-09	Europe	Germany	Thuringia		kölleda	99625	51.1878	11.2461	29884	44
6166ba5b81e18c1c41cecfb4	1024550757	IIMK	ncov	Human	B.1.1.7	20I (Alpha, V1)	2021-04-09	Europe	Germany	Thuringia		sömmerda	99610	51.1627	11.1157	29884	113
6166ba5b81e18c1c41cecfb9	1024550762	IIMK	ncov	Human	B.1.1.7	20I (Alpha, V1)	2021-04-09	Europe	Germany	Thuringia		sömmerda	99610	51.1627	11.1157	29884	35
6166ba5b81e18c1c41cecfba	1024550763	IIMK	ncov	Human	B.1.1.7	20I (Alpha, V1)	2021-04-09	Europe	Germany	Thuringia		sömmerda	99610	51.1627	11.1157	29884	48
6166ba5b81e18c1c41cecfbf	1024586996	IIMK	ncov	Human	B.1.1.7	20I (Alpha, V1)	2021-04-08	Europe	Germany	Thuringia		worbis	37339	51.4188	10.3625	29884	942
6166ba5b81e18c1c41cecfc5	1024587036	IIMK	ncov	Human	B.1.1.7	20I (Alpha, V1)	2021-04-09	Europe	Germany	Thuringia		leinefelde	37327	51.3887	10.3268	29884	164
6166ba5b81e18c1c41cecfd7	1024625406	IIMK	ncov	Human	B.1.1.7	20I (Alpha, V1)	2021-04-07	Europe	Germany	Thuringia		ohrdruf	99885	50.8288	10.7341	29884	452
6166ba5b81e18c1c41cecfdb	1024625456	IIMK	ncov	Human	B.1.1.7	20I (Alpha, V1)	2021-04-07	Europe	Germany	Thuringia		bad salzungen	36433	50.8117	10.2327	29884	416
6166ba5b81e18c1c41cecfe0	1024625713	IIMK	ncov	Human	B.1.1.7	20I (Alpha, V1)	2021-04-08	Europe	Germany	Thuringia		tabarz/thür.wald	99891	50.8654	10.5024	29884	1045
6166ba5b81e18c1c41cecfe1	1024625731	IIMK	ncov	Human	B.1.1.7	20I (Alpha, V1)	2021-04-08	Europe	Germany	Thuringia		saalfeld	7318	50.6477	11.3596	29893	255
6166ba5b81e18c1c41cecfe5	1024625775	IIMK	ncov	Human	B.1.1.7	20I (Alpha, V1)	2021-04-10	Europe	Germany	Thuringia		dreigleichen	99869	50.8916	10.8103	29881	926
6166ba5b81e18c1c41cecfe6	1024625776	IIMK	ncov	Human	B.1.1.7	20I (Alpha, V1)	2021-04-10	Europe	Germany	Thuringia		dreigleichen	99869	50.8916	10.8103	29884	43
6166ba5b81e18c1c41cecfea	1024625796	IIMK	ncov	Human	B.1.1.7	20I (Alpha, V1)	2021-04-10	Europe	Germany	Thuringia		gotha	99867	50.9461	10.6962	29884	687
6166ba5b81e18c1c41cecff7	1050201229	IIMK	ncov	Human	B.1.1.7	20I (Alpha, V1)	2021-04-10	Europe	Germany	Thuringia		weida	7570	50.7735	12.0614	29884	72
6166ba5b81e18c1c41cecff8	1091317557	IIMK	ncov	Human	B.1.1.7	20I (Alpha, V1)	2021-04-05	Europe	Germany	Thuringia		arnstadt	99310	50.8343	10.9456	29884	48
6166ba5b81e18c1c41cecfff	1091320197	IIMK	ncov	Human	B.1.1.7	20I (Alpha, V1)	2021-04-07	Europe	Germany	Thuringia		rodeberg	99976	51.2479	10.3519	29884	243
6166ba5b81e18c1c41ced002	1091321262	IIMK	ncov	Human	B.1.1.7	20I (Alpha, V1)	2021-04-08	Europe	Germany	Thuringia		arnstadt	99310	50.8343	10.9456	29884	112
6166ba5b81e18c1c41ced003	1091321289	IIMK	ncov	Human	B.1.1.7	20I (Alpha, V1)	2021-04-08	Europe	Germany	Thuringia		arnstadt	99310	50.8343	10.9456	29884	70
6166ba5b81e18c1c41ced004	1091321411	IIMK	ncov	Human	B.1.1.7	20I (Alpha, V1)	2021-04-08	Europe	Germany	Thuringia		arnstadt	99310	50.8343	10.9456	29884	100
6166ba5b81e18c1c41ced007	1091322275	IIMK	ncov	Human	B.1.1.7	20I (Alpha, V1)	2021-04-09	Europe	Germany	Thuringia		weimar	99423	50.9803	11.3272	29884	162
6166ba5b81e18c1c41ced00b	1091322306	IIMK	ncov	Human	B.1.1.7	20I (Alpha, V1)	2021-04-09	Europe	Germany	Thuringia		weimar	99423	50.9803	11.3272	29884	343
6166ba5b81e18c1c41ced011	1091322350	IIMK	ncov	Human	B.1.1.7	20I (Alpha, V1)	2021-04-09	Europe	Germany	Thuringia		arnstadt	99310	50.8343	10.9456	29884	81
6166ba5b81e18c1c41ced018	1091322465	IIMK	ncov	Human	B.1.1.7	20I (Alpha, V1)	2021-04-09	Europe	Germany	Thuringia		arnstadt	99310	50.8343	10.9456	29884	268
6166ba5b81e18c1c41ced022	1091322697	IIMK	ncov	Human	B.1.1.7	20I (Alpha, V1)	2021-04-09	Europe	Germany	Thuringia		arnstadt	99310	50.8343	10.9456	29884	79
6166ba5b81e18c1c41ced023	1091322723	IIMK	ncov	Human	B.1.1.7	20I (Alpha, V1)	2021-04-09	Europe	Germany	Thuringia		mühlhausen	99974	51.2088	10.459	29884	113
6166ba5b81e18c1c41ced024	1091322725	IIMK	ncov	Human	B.1.1.7	20I (Alpha, V1)	2021-04-09	Europe	Germany	Thuringia		mühlhausen	99974	51.2088	10.459	29884	465
6166ba5b81e18c1c41ced026	1091322734	IIMK	ncov	Human	B.1.1.7	20I (Alpha, V1)	2021-04-09	Europe	Germany	Thuringia		jena	7745	50.9283	11.5853	29884	54
6166ba5b81e18c1c41ced028	1091322769	IIMK	ncov	Human	B.1.1.7	20I (Alpha, V1)	2021-04-09	Europe	Germany	Thuringia		heiligenstadt	37308	51.378	10.1376	29884	85
6166ba5b81e18c1c41ced02c	1091323599	IIMK	ncov	Human	B.1.1.7	20I (Alpha, V1)	2021-04-12	Europe	Germany	Thuringia		treffurt/ifta	99830	51.1369	10.2336	29884	485
6166ba5b81e18c1c41ced02f	1002047402	IIMK	ncov	Human	B.1.1.7	20I (Alpha, V1)	2021-04-12	Europe	Germany	Thuringia		zeulenroda-triebes	7937	50.6489	11.9803	29808	0
6166ba5b81e18c1c41ced030	1004352095	IIMK	ncov	Human	B.1.1.7	20I (Alpha, V1)	2021-04-12	Europe	Germany	Thuringia		gera	7549	50.8753	12.0788	29797	796
6166ba5b81e18c1c41ced031	1011241026	IIMK	ncov	Human	B.1.1.7	20I (Alpha, V1)	2021-04-12	Europe	Germany	Thuringia		schmölln	4626	50.8953	12.3497	29812	0
6166ba5b81e18c1c41ced032	1011251024	IIMK	ncov	Human	B.1.1.7	20I (Alpha, V1)	2021-04-12	Europe	Germany	Thuringia		schmölln	4626	50.8953	12.3497	29809	0
6166ba5b81e18c1c41ced034	1011721148	IIMK	ncov	Human	B.1.1.7	20I (Alpha, V1)	2021-04-12	Europe	Germany	Thuringia		schleiz	7907	50.5774	11.8089	29795	450
6166ba5b81e18c1c41ced037	1024550768	IIMK	ncov	Human	B.1.1.7	20I (Alpha, V1)	2021-04-12	Europe	Germany	Thuringia		buttstädt	99628	51.1218	11.4169	29803	0
6166ba5b81e18c1c41ced038	1024550770	IIMK	ncov	Human	B.1.1.7	20I (Alpha, V1)	2021-04-12	Europe	Germany	Thuringia		sömmerda	99610	51.1627	11.1157	29811	0
6166ba5b81e18c1c41ced03a	1024550772	IIMK	ncov	Human	B.1.1.7	20I (Alpha, V1)	2021-04-12	Europe	Germany	Thuringia		sömmerda	99610	51.1627	11.1157	29800	0
6166ba5b81e18c1c41ced03c	1024587112	IIMK	ncov	Human	B.1.1.7	20I (Alpha, V1)	2021-04-12	Europe	Germany	Thuringia		heiligenstadt	37308	51.378	10.1376	29812	0
6166ba5b81e18c1c41ced03d	1024587123	IIMK	ncov	Human	B.1.1.7	20I (Alpha, V1)	2021-04-12	Europe	Germany	Thuringia		leinefelde	37327	51.3887	10.3268	29811	0
6166ba5b81e18c1c41ced041	1024587181	IIMK	ncov	Human	B.1.1.7	20I (Alpha, V1)	2021-04-12	Europe	Germany	Thuringia		arenshausen	37318	51.3624	10.0721	29808	0
6166ba5b81e18c1c41cecf74	1091321438	IIMK	ncov	Human	B.1.1.7	20I (Alpha, V1)	2021-04-08	Europe	Germany	Thuringia		arnstadt	99310	50.8343	10.9456	29890	340
6166ba5b81e18c1c41cecf7c	1091321622	IIMK	ncov	Human	B.1.1.7	20I (Alpha, V1)	2021-04-09	Europe	Germany	Thuringia		sondershausen	99706	51.3677	10.8675	29884	974
6166ba5b81e18c1c41cecf7e	1002047371	IIMK	ncov	Human	B.1.1.7	20I (Alpha, V1)	2021-04-08	Europe	Germany	Thuringia		zeulenroda-triebes	7937	50.6489	11.9803	29884	436
6166ba5b81e18c1c41cecf82	1024085079	IIMK	ncov	Human	B.1.1.7	20I (Alpha, V1)	2021-04-08	Europe	Germany	Thuringia		sondershausen	99706	51.3677	10.8675	29884	206
6166ba5b81e18c1c41cecf83	1024471111	IIMK	ncov	Human	B.1.1.7	20I (Alpha, V1)	2021-04-09	Europe	Germany	Thuringia		barchfeld	36456	50.8283	11.1816	29884	33
6166ba5b81e18c1c41cecf87	1024471116	IIMK	ncov	Human	B.1.1.7	20I (Alpha, V1)	2021-04-09	Europe	Germany	Thuringia		dorndorf	36460	50.8353	10.0905	29884	80
6166ba5b81e18c1c41cecf89	1024471126	IIMK	ncov	Human	B.1.1.7	20I (Alpha, V1)	2021-04-09	Europe	Germany	Thuringia		bad salzungen	36433	50.8117	10.2327	29884	81
6166ba5b81e18c1c41cecf93	1024625757	IIMK	ncov	Human	B.1.1.7	20I (Alpha, V1)	2021-04-08	Europe	Germany	Thuringia		dreigleichen	99869	50.8916	10.8103	29849	214
6166ba5b81e18c1c41cecf98	1027540988	IIMK	ncov	Human	B.1.1.7	20I (Alpha, V1)	2021-04-08	Europe	Germany	Thuringia		bürgel	7616	50.9422	11.7571	29884	200
6166ba5b81e18c1c41cecfa4	1091321229	IIMK	ncov	Human	B.1.1.7	20I (Alpha, V1)	2021-04-08	Europe	Germany	Thuringia		arnstadt	99310	50.8343	10.9456	29884	83
6166ba5b81e18c1c41cecfa6	1091321265	IIMK	ncov	Human	B.1.1.7	20I (Alpha, V1)	2021-04-08	Europe	Germany	Thuringia		arnstadt	99310	50.8343	10.9456	29884	461
6166ba5b81e18c1c41cecfad	1005408289	IIMK	ncov	Human	B.1.1.7	20I (Alpha, V1)	2021-04-09	Europe	Germany	Thuringia		ronneburg	7580	50.8628	12.1813	29884	627
6166ba5b81e18c1c41cecfae	1009018486	IIMK	ncov	Human	B.1.1.7	20I (Alpha, V1)	2021-04-09	Europe	Germany	Thuringia		stadtroda	7646	50.86	11.7281	29884	256
6166ba5b81e18c1c41cecfaf	1024550736	IIMK	ncov	Human	B.1.1.7	20I (Alpha, V1)	2021-04-08	Europe	Germany	Thuringia		sömmerda	99610	51.1627	11.1157	29884	131
6166ba5b81e18c1c41cecfb0	1024550741	IIMK	ncov	Human	B.1.1.7	20I (Alpha, V1)	2021-04-08	Europe	Germany	Thuringia		kölleda	99625	51.1878	11.2461	29884	218
6166ba5b81e18c1c41cecfb5	1024550758	IIMK	ncov	Human	B.1.1.7	20I (Alpha, V1)	2021-04-09	Europe	Germany	Thuringia		sömmerda	99610	51.1627	11.1157	29884	68
6166ba5b81e18c1c41cecfbc	1024550765	IIMK	ncov	Human	B.1.1.7	20I (Alpha, V1)	2021-04-09	Europe	Germany	Thuringia		sömmerda	99610	51.1627	11.1157	29884	64
6166ba5b81e18c1c41cecfbd	1024550766	IIMK	ncov	Human	B.1.1.7	20I (Alpha, V1)	2021-04-09	Europe	Germany	Thuringia		sömmerda	99610	51.1627	11.1157	29884	269
6166ba5b81e18c1c41cecfc0	1024587010	IIMK	ncov	Human	B.1.1.7	20I (Alpha, V1)	2021-04-09	Europe	Germany	Thuringia		arenshausen	37318	51.3624	10.0721	29884	726
6166ba5b81e18c1c41cecfc2	1024587028	IIMK	ncov	Human	B.1.1.7	20I (Alpha, V1)	2021-04-09	Europe	Germany	Thuringia		leinefelde	37327	51.3887	10.3268	29884	101
6166ba5b81e18c1c41cecfc9	1024587072	IIMK	ncov	Human	B.1.1.7	20I (Alpha, V1)	2021-04-09	Europe	Germany	Thuringia		heiligenstadt	37308	51.378	10.1376	29884	80
6166ba5b81e18c1c41cecfcd	1024587102	IIMK	ncov	Human	B.1.1.7	20I (Alpha, V1)	2021-04-09	Europe	Germany	Thuringia		am ohmberg	37345	51.5385	10.4226	29884	305
6166ba5b81e18c1c41cecfcf	1024587105	IIMK	ncov	Human	B.1.1.7	20I (Alpha, V1)	2021-04-09	Europe	Germany	Thuringia		heiligenstadt	37308	51.378	10.1376	29884	68
6166ba5b81e18c1c41cecfd0	1024625361	IIMK	ncov	Human	B.1.1.7	20I (Alpha, V1)	2021-04-07	Europe	Germany	Thuringia		waltershausen	99880	50.8998	10.5563	29884	163
6166ba5b81e18c1c41cecfd9	1024625419	IIMK	ncov	Human	B.1.1.7	20I (Alpha, V1)	2021-04-07	Europe	Germany	Thuringia		gotha	99867	50.9461	10.6962	29884	217
6166ba5b81e18c1c41cecfda	1024625448	IIMK	ncov	Human	B.1.1.7	20I (Alpha, V1)	2021-04-07	Europe	Germany	Thuringia		gotha	99867	50.9461	10.6962	29884	182
6166ba5b81e18c1c41cecfe7	1024625785	IIMK	ncov	Human	B.1.1.7	20I (Alpha, V1)	2021-04-10	Europe	Germany	Thuringia		großvargula	99958	51075	10.7333	29884	99
6166ba5b81e18c1c41cecfe8	1024625788	IIMK	ncov	Human	B.1.1.7	20I (Alpha, V1)	2021-04-10	Europe	Germany	Thuringia		friedrichroda	99894	50.8575	10.5651	29884	59
6166ba5b81e18c1c41cecfeb	1024625801	IIMK	ncov	Human	B.1.1.7	20I (Alpha, V1)	2021-04-10	Europe	Germany	Thuringia		ohrdruf	99885	50.8288	10.7341	29880	53
6166ba5b81e18c1c41cecff1	1027540855	IIMK	ncov	Human	B.1.1.7	20I (Alpha, V1)	2021-04-07	Europe	Germany	Thuringia		stadtroda	7646	50.86	11.7281	29884	130
6166ba5b81e18c1c41cecff2	1027540859	IIMK	ncov	Human	B.1.1.7	20I (Alpha, V1)	2021-04-07	Europe	Germany	Thuringia		eisenberg	7607	50.9689	11.8964	29887	615
6166ba5b81e18c1c41cecffa	1091318679	IIMK	ncov	Human	B.1.1.7	20I (Alpha, V1)	2021-04-07	Europe	Germany	Thuringia		arnstadt	99310	50.8343	10.9456	29884	35
6166ba5b81e18c1c41cecffc	1091319724	IIMK	ncov	Human	B.1.1.7	20I (Alpha, V1)	2021-04-07	Europe	Germany	Thuringia		arnstadt	99310	50.8343	10.9456	29884	51
6166ba5b81e18c1c41cecffd	1091319735	IIMK	ncov	Human	B.1.1.7	20I (Alpha, V1)	2021-04-07	Europe	Germany	Thuringia		arnstadt	99310	50.8343	10.9456	29884	74
6166ba5b81e18c1c41ced009	1091322279	IIMK	ncov	Human	B.1.1.7	20I (Alpha, V1)	2021-04-09	Europe	Germany	Thuringia		weimar	99423	50.9803	11.3272	29884	71
6166ba5b81e18c1c41ced00e	1091322336	IIMK	ncov	Human	B.1.1.7	20I (Alpha, V1)	2021-04-09	Europe	Germany	Thuringia		arnstadt	99310	50.8343	10.9456	29884	81
6166ba5b81e18c1c41ced00f	1091322340	IIMK	ncov	Human	B.1.1.7	20I (Alpha, V1)	2021-04-09	Europe	Germany	Thuringia		arnstadt	99310	50.8343	10.9456	29884	83
6166ba5b81e18c1c41ced010	1091322348	IIMK	ncov	Human	B.1.1.7	20I (Alpha, V1)	2021-04-09	Europe	Germany	Thuringia		arnstadt	99310	50.8343	10.9456	29884	64
6166ba5b81e18c1c41ced016	1091322421	IIMK	ncov	Human	B.1.1.7	20I (Alpha, V1)	2021-04-09	Europe	Germany	Thuringia		arnstadt	99310	50.8343	10.9456	29884	85
6166ba5b81e18c1c41ced019	1091322480	IIMK	ncov	Human	B.1.1.7	20I (Alpha, V1)	2021-04-09	Europe	Germany	Thuringia		arnstadt	99310	50.8343	10.9456	29884	84
6166ba5b81e18c1c41ced01a	1091322567	IIMK	ncov	Human	B.1.1.7	20I (Alpha, V1)	2021-04-09	Europe	Germany	Thuringia		arnstadt	99310	50.8343	10.9456	29884	75
6166ba5b81e18c1c41ced01e	1091322658	IIMK	ncov	Human	B.1.1.7	20I (Alpha, V1)	2021-04-09	Europe	Germany	Thuringia		arnstadt	99310	50.8343	10.9456	29863	77
6166ba5b81e18c1c41ced021	1091322678	IIMK	ncov	Human	B.1.1.7	20I (Alpha, V1)	2021-04-09	Europe	Germany	Thuringia		mühlhausen	99974	51.2088	10.459	29884	254
6166ba5b81e18c1c41ced025	1091322726	IIMK	ncov	Human	B.1.1.7	20I (Alpha, V1)	2021-04-09	Europe	Germany	Thuringia		mühlhausen	99974	51.2088	10.459	29868	169
6166ba5b81e18c1c41ced02a	1091323257	IIMK	ncov	Human	B.1.1.7	20I (Alpha, V1)	2021-04-11	Europe	Germany	Thuringia		weimar	99423	50.9803	11.3272	29884	57
6166ba5b81e18c1c41ced039	1024550771	IIMK	ncov	Human	B.1.1.7	20I (Alpha, V1)	2021-04-12	Europe	Germany	Thuringia		gebesee	99189	51.1158	10.9314	29804	0
6166ba5b81e18c1c41ced03e	1024587135	IIMK	ncov	Human	B.1.1.7	20I (Alpha, V1)	2021-04-12	Europe	Germany	Thuringia		worbis	37339	51.4188	10.3625	29808	0
6166ba5b81e18c1c41cecf75	1091321439	IIMK	ncov	Human	B.1.1.7	20I (Alpha, V1)	2021-04-08	Europe	Germany	Thuringia		arnstadt	99310	50.8343	10.9456	29884	84
6166ba5b81e18c1c41cecf7a	1091321619	IIMK	ncov	Human	B.1.1.7	20I (Alpha, V1)	2021-04-09	Europe	Germany	Thuringia		erfurt	99090	50.9775	11.0251	29884	1004
6166ba5b81e18c1c41cecf7f	1004352078	IIMK	ncov	Human	B.1.1.7	20I (Alpha, V1)	2021-04-08	Europe	Germany	Thuringia		gera	7548	50.8753	12.0788	29884	222
6166ba5b81e18c1c41cecf85	1024471113	IIMK	ncov	Human	B.1.1.7	20I (Alpha, V1)	2021-04-09	Europe	Germany	Thuringia		barchfeld	36456	50.8283	11.1816	29884	60
6166ba5b81e18c1c41cecf8d	1024550738	IIMK	ncov	Human	B.1.1.7	20I (Alpha, V1)	2021-04-08	Europe	Germany	Thuringia		sömmerda	99610	51.1627	11.1157	29889	349
6166ba5b81e18c1c41cecf8e	1024550740	IIMK	ncov	Human	B.1.1.7	20I (Alpha, V1)	2021-04-08	Europe	Germany	Thuringia		sömmerda	99610	51.1627	11.1157	29892	450
6166ba5b81e18c1c41cecf96	1025082641	IIMK	ncov	Human	B.1.1.7	20I (Alpha, V1)	2021-04-08	Europe	Germany	Thuringia		eisenberg	7607	50.9689	11.8964	29883	1284
6166ba5b81e18c1c41cecf97	1025082653	IIMK	ncov	Human	B.1.1.7	20I (Alpha, V1)	2021-04-08	Europe	Germany	Thuringia		hermsdorf	7629	50.8961	11.8579	29884	46
6166ba5b81e18c1c41cecf99	1050199337	IIMK	ncov	Human	B.1.1.7	20I (Alpha, V1)	2021-04-08	Europe	Germany	Thuringia		gera	7552	50.8753	12.0788	29884	214
6166ba5b81e18c1c41cecf9b	1050200715	IIMK	ncov	Human	B.1.1.7	20I (Alpha, V1)	2021-04-09	Europe	Germany	Thuringia		ronneburg	7580	50.8628	12.1813	29884	302
6166ba5b81e18c1c41cecf9c	1091320986	IIMK	ncov	Human	B.1.1.7	20I (Alpha, V1)	2021-04-08	Europe	Germany	Thuringia		jena	7751	50.9283	11.5853	29884	201
6166ba5b81e18c1c41cecf9f	1091321046	IIMK	ncov	Human	B.1.1.7	20I (Alpha, V1)	2021-04-08	Europe	Germany	Thuringia		bad langensalza	99947	51.1089	10.6475	29885	786
6166ba5b81e18c1c41cecfa0	1091321053	IIMK	ncov	Human	B.1.1.7	20I (Alpha, V1)	2021-04-08	Europe	Germany	Thuringia		arnstadt	99310	50.8343	10.9456	29884	170
6166ba5b81e18c1c41cecfa2	1091321077	IIMK	ncov	Human	B.1.1.7	20I (Alpha, V1)	2021-04-08	Europe	Germany	Thuringia		arnstadt	99310	50.8343	10.9456	29877	72
6166ba5b81e18c1c41cecfa7	1091321266	IIMK	ncov	Human	B.1.1.7	20I (Alpha, V1)	2021-04-08	Europe	Germany	Thuringia		arnstadt	99310	50.8343	10.9456	29884	65
6166ba5b81e18c1c41cecfa8	1091321279	IIMK	ncov	Human	B.1.1.7	20I (Alpha, V1)	2021-04-08	Europe	Germany	Thuringia		arnstadt	99310	50.8343	10.9456	29884	55
6166ba5b81e18c1c41cecfb7	1024550760	IIMK	ncov	Human	B.1.1.7	20I (Alpha, V1)	2021-04-09	Europe	Germany	Thuringia		rastenberg	99636	51.1757	11.4201	29881	307
6166ba5b81e18c1c41cecfbe	1024586968	IIMK	ncov	Human	B.1.1.7	20I (Alpha, V1)	2021-04-08	Europe	Germany	Thuringia		heiligenstadt	37308	51.378	10.1376	29884	75
6166ba5b81e18c1c41cecfc1	1024587011	IIMK	ncov	Human	B.1.1.7	20I (Alpha, V1)	2021-04-09	Europe	Germany	Thuringia		heiligenstadt	37308	51.378	10.1376	29884	44
6166ba5b81e18c1c41cecfc3	1024587031	IIMK	ncov	Human	B.1.1.7	20I (Alpha, V1)	2021-04-09	Europe	Germany	Thuringia		niederorschel	37355	51.3722	10.4237	29884	79
6166ba5b81e18c1c41cecfc4	1024587035	IIMK	ncov	Human	B.1.1.7	20I (Alpha, V1)	2021-04-09	Europe	Germany	Thuringia		arenshausen	37318	51.3624	10.0721	29884	228
6166ba5b81e18c1c41cecfc7	1024587052	IIMK	ncov	Human	B.1.1.7	20I (Alpha, V1)	2021-04-09	Europe	Germany	Thuringia		heiligenstadt	37308	51.378	10.1376	29884	245
6166ba5b81e18c1c41cecfca	1024587091	IIMK	ncov	Human	B.1.1.7	20I (Alpha, V1)	2021-04-09	Europe	Germany	Thuringia		am ohmberg	37345	51.5385	10.4226	29884	68
6166ba5b81e18c1c41cecfcc	1024587100	IIMK	ncov	Human	B.1.1.7	20I (Alpha, V1)	2021-04-09	Europe	Germany	Thuringia		worbis	37339	51.4188	10.3625	29880	73
6166ba5b81e18c1c41cecfce	1024587104	IIMK	ncov	Human	B.1.1.7	20I (Alpha, V1)	2021-04-09	Europe	Germany	Thuringia		heiligenstadt	37308	51.378	10.1376	29884	83
6166ba5b81e18c1c41cecfd1	1024625375	IIMK	ncov	Human	B.1.1.7	20I (Alpha, V1)	2021-04-07	Europe	Germany	Thuringia		georgenthal/thür.wald	99887	50.8321	10.6627	29884	252
6166ba5b81e18c1c41cecfd2	1024625378	IIMK	ncov	Human	B.1.1.7	20I (Alpha, V1)	2021-04-07	Europe	Germany	Thuringia		dreigleichen	99869	50.8916	10.8103	29884	102
6166ba5b81e18c1c41cecfd4	1024625403	IIMK	ncov	Human	B.1.1.7	20I (Alpha, V1)	2021-04-07	Europe	Germany	Thuringia		gotha	99867	50.9461	10.6962	29884	267
6166ba5b81e18c1c41cecfdd	1024625468	IIMK	ncov	Human	B.1.1.7	20I (Alpha, V1)	2021-04-07	Europe	Germany	Thuringia		waltershausen	99880	50.8998	10.5563	29884	243
6166ba5b81e18c1c41cecfde	1024625693	IIMK	ncov	Human	B.1.1.7	20I (Alpha, V1)	2021-04-07	Europe	Germany	Thuringia		gotha	99867	50.9461	10.6962	29884	252
6166ba5b81e18c1c41cecfe2	1024625739	IIMK	ncov	Human	B.1.1.7	20I (Alpha, V1)	2021-04-08	Europe	Germany	Thuringia		gotha	99867	50.9461	10.6962	29884	227
6166ba5b81e18c1c41cecfe3	1024625770	IIMK	ncov	Human	B.1.1.7	20I (Alpha, V1)	2021-04-10	Europe	Germany	Thuringia		dreigleichen	99869	50.8916	10.8103	29884	69
6166ba5b81e18c1c41cecfec	1024626373	IIMK	ncov	Human	B.1.1.7	20I (Alpha, V1)	2021-04-08	Europe	Germany	Thuringia		waltershausen	99880	50.8998	10.5563	29884	122
6166ba5b81e18c1c41cecfee	1024626994	IIMK	ncov	Human	B.1.1.7	20I (Alpha, V1)	2021-04-07	Europe	Germany	Thuringia		georgenthal/thür.wald	99887	50.8321	10.6627	29880	263
6166ba5b81e18c1c41cecff0	1025082675	IIMK	ncov	Human	B.1.1.7	20I (Alpha, V1)	2021-04-09	Europe	Germany	Thuringia		eisenberg	7607	50.9689	11.8964	29884	527
6166ba5b81e18c1c41cecff5	1028840009	IIMK	ncov	Human	B.1.1.7	20I (Alpha, V1)	2021-04-10	Europe	Germany	Thuringia		sondershausen	99706	51.3677	10.8675	29884	78
6166ba5b81e18c1c41cecffb	1091318812	IIMK	ncov	Human	B.1.1.7	20I (Alpha, V1)	2021-04-07	Europe	Germany	Thuringia		arnstadt	99310	50.8343	10.9456	29880	240
6166ba5b81e18c1c41ced001	1091321048	IIMK	ncov	Human	B.1.1.7	20I (Alpha, V1)	2021-04-08	Europe	Germany	Thuringia		großvargula	99958	51075	10.7333	29884	33
6166ba5b81e18c1c41ced006	1091321682	IIMK	ncov	Human	B.1.1.7	20I (Alpha, V1)	2021-04-09	Europe	Germany	Thuringia		jena	7745	50.9283	11.5853	29884	41
6166ba5b81e18c1c41ced00d	1091322312	IIMK	ncov	Human	B.1.1.7	20I (Alpha, V1)	2021-04-09	Europe	Germany	Thuringia		weimar	99423	50.9803	11.3272	29884	247
6166ba5b81e18c1c41ced012	1091322352	IIMK	ncov	Human	B.1.1.7	20I (Alpha, V1)	2021-04-09	Europe	Germany	Thuringia		arnstadt	99310	50.8343	10.9456	29884	74
6166ba5b81e18c1c41ced01b	1091322582	IIMK	ncov	Human	B.1.1.7	20I (Alpha, V1)	2021-04-09	Europe	Germany	Thuringia		arnstadt	99310	50.8343	10.9456	29884	129
6166ba5b81e18c1c41ced01f	1091322665	IIMK	ncov	Human	B.1.1.7	20I (Alpha, V1)	2021-04-09	Europe	Germany	Thuringia		arnstadt	99310	50.8343	10.9456	29884	80
6166ba5b81e18c1c41ced027	1091322767	IIMK	ncov	Human	B.1.1.7	20I (Alpha, V1)	2021-04-09	Europe	Germany	Thuringia		heiligenstadt	37308	51.378	10.1376	29884	374
6166ba5b81e18c1c41ced02b	1091323259	IIMK	ncov	Human	B.1.1.7	20I (Alpha, V1)	2021-04-11	Europe	Germany	Thuringia		jena	7743	50.9283	11.5853	29884	41
6166ba5b81e18c1c41ced02d	1091323600	IIMK	ncov	Human	B.1.1.7	20I (Alpha, V1)	2021-04-12	Europe	Germany	Thuringia		gerstungen	99834	50.9638	10.0645	29884	57
6166ba5b81e18c1c41ced02e	1001881462	IIMK	ncov	Human	B.1.1.7	20I (Alpha, V1)	2021-04-12	Europe	Germany	Thuringia		gera	7557	50.8753	12.0788	29802	39
6166ba5b81e18c1c41ced036	1024550767	IIMK	ncov	Human	B.1.1.7	20I (Alpha, V1)	2021-04-12	Europe	Germany	Thuringia		sömmerda	99610	51.1627	11.1157	29804	0
6166ba5b81e18c1c41ced03b	1024587110	IIMK	ncov	Human	B.1.1.7	20I (Alpha, V1)	2021-04-12	Europe	Germany	Thuringia		worbis	37339	51.4188	10.3625	29812	0
6166ba5b81e18c1c41ced03f	1024587177	IIMK	ncov	Human	B.1.1.7	20I (Alpha, V1)	2021-04-12	Europe	Germany	Thuringia		am ohmberg	37345	51.5385	10.4226	29781	1368
6166ba5b81e18c1c41ced042	1024587194	IIMK	ncov	Human	B.1.1.7	20I (Alpha, V1)	2021-04-12	Europe	Germany	Thuringia		dingelstädt	37351	51.3156	10.3215	29796	470
6166ba5b81e18c1c41ced043	1024587204	IIMK	ncov	Human	B.1.1.7	20I (Alpha, V1)	2021-04-12	Europe	Germany	Thuringia		heiligenstadt	37308	51.378	10.1376	29808	0
6166ba5b81e18c1c41ced044	1024587205	IIMK	ncov	Human	B.1.1.7	20I (Alpha, V1)	2021-04-12	Europe	Germany	Thuringia		heiligenstadt	37308	51.378	10.1376	29809	0
6166ba5b81e18c1c41ced045	1024587209	IIMK	ncov	Human	B.1.1.7	20I (Alpha, V1)	2021-04-12	Europe	Germany	Thuringia		heiligenstadt	37308	51.378	10.1376	29796	436
6166ba5b81e18c1c41ced048	1024587214	IIMK	ncov	Human	B.1.1.7	20I (Alpha, V1)	2021-04-12	Europe	Germany	Thuringia		heiligenstadt	37308	51.378	10.1376	29806	0
6166ba5b81e18c1c41ced052	1024625859	IIMK	ncov	Human	B.1.1.7	20I (Alpha, V1)	2021-04-12	Europe	Germany	Thuringia		ohrdruf	99885	50.8288	10.7341	29802	0
6166ba5b81e18c1c41ced05e	1050203476	IIMK	ncov	Human	B.1.1.7	20I (Alpha, V1)	2021-04-12	Europe	Germany	Thuringia		bad köstritz	7586	50.9301	12.0118	29794	1159
6166ba5b81e18c1c41ced061	1091323374	IIMK	ncov	Human	B.1.1.7	20I (Alpha, V1)	2021-04-12	Europe	Germany	Thuringia		arnstadt	99310	50.8343	10.9456	29808	0
6166ba5b81e18c1c41ced065	1091324595	IIMK	ncov	Human	B.1.1.7	20I (Alpha, V1)	2021-04-12	Europe	Germany	Thuringia		arnstadt	99310	50.8343	10.9456	29800	0
6166ba5b81e18c1c41ced067	1091324625	IIMK	ncov	Human	B.1.1.7	20I (Alpha, V1)	2021-04-12	Europe	Germany	Thuringia		arnstadt	99310	50.8343	10.9456	29800	0
6166ba5b81e18c1c41ced069	1091324642	IIMK	ncov	Human	B.1.1.7	20I (Alpha, V1)	2021-04-12	Europe	Germany	Thuringia		arnstadt	99310	50.8343	10.9456	29796	195
6166ba5b81e18c1c41ced06d	1091324769	IIMK	ncov	Human	B.1.1.7	20I (Alpha, V1)	2021-04-12	Europe	Germany	Thuringia		arnstadt	99310	50.8343	10.9456	29808	1
6166ba5b81e18c1c41ced06f	1091324788	IIMK	ncov	Human	B.1.1.7	20I (Alpha, V1)	2021-04-12	Europe	Germany	Thuringia		mühlhausen	99974	51.2088	10.459	29799	0
6166ba5b81e18c1c41ced077	1091324945	IIMK	ncov	Human	B.1.1.7	20I (Alpha, V1)	2021-04-13	Europe	Germany	Thuringia		tabarz/thür.wald	99891	50.8654	10.5024	29884	31
6166ba5b81e18c1c41ced078	1091324947	IIMK	ncov	Human	B.1.1.7	20I (Alpha, V1)	2021-04-13	Europe	Germany	Thuringia		erfurt	99099	50.9775	11.0251	29861	60
6166ba5b81e18c1c41ced079	1091324948	IIMK	ncov	Human	B.1.1.7	20I (Alpha, V1)	2021-04-13	Europe	Germany	Thuringia		gebesee	99189	51.1158	10.9314	29884	51
6166ba5b81e18c1c41ced07e	1024083240	IIMK	ncov	Human	B.1.1.7	20I (Alpha, V1)	2021-04-13	Europe	Germany	Thuringia		sondershausen	99706	51.3677	10.8675	29797	281
6166ba5b81e18c1c41ced082	1024085141	IIMK	ncov	Human	B.1.1.7	20I (Alpha, V1)	2021-04-13	Europe	Germany	Thuringia		greußen	99718	51.2286	10.9491	29800	0
6166ba5b81e18c1c41ced083	1024465010	IIMK	ncov	Human	B.1.1.7	20I (Alpha, V1)	2021-04-12	Europe	Germany	Thuringia		weimar	99423	50.9803	11.3272	29800	274
6166ba5b81e18c1c41ced08c	1024625828	IIMK	ncov	Human	B.1.1.7	20I (Alpha, V1)	2021-04-12	Europe	Germany	Thuringia		gotha	99867	50.9461	10.6962	29797	237
6166ba5b81e18c1c41ced08f	1024625854	IIMK	ncov	Human	B.1.1.7	20I (Alpha, V1)	2021-04-12	Europe	Germany	Thuringia		waltershausen	99880	50.8998	10.5563	29799	9
6166ba5b81e18c1c41ced090	1024625860	IIMK	ncov	Human	B.1.1.7	20I (Alpha, V1)	2021-04-12	Europe	Germany	Thuringia		gotha	99867	50.9461	10.6962	29799	9
6166ba5b81e18c1c41ced093	1024625877	IIMK	ncov	Human	B.1.1.7	20I (Alpha, V1)	2021-04-14	Europe	Germany	Thuringia		dreigleichen	99869	50.8916	10.8103	29805	0
6166ba5b81e18c1c41ced096	1024625893	IIMK	ncov	Human	B.1.1.7	20I (Alpha, V1)	2021-04-14	Europe	Germany	Thuringia		gotha	99867	50.9461	10.6962	29807	1
6166ba5b81e18c1c41ced098	1024625904	IIMK	ncov	Human	B.1.1.7	20I (Alpha, V1)	2021-04-14	Europe	Germany	Thuringia		ohrdruf	99885	50.8288	10.7341	29797	3
6166ba5b81e18c1c41ced09e	1024625937	IIMK	ncov	Human	B.1.1.7	20I (Alpha, V1)	2021-04-14	Europe	Germany	Thuringia		waltershausen	99880	50.8998	10.5563	29799	349
6166ba5b81e18c1c41ced09f	1024625940	IIMK	ncov	Human	B.1.1.7	20I (Alpha, V1)	2021-04-14	Europe	Germany	Thuringia		dreigleichen	99869	50.8916	10.8103	29794	0
6166ba5b81e18c1c41ced0a4	1024625950	IIMK	ncov	Human	B.1.1.7	20I (Alpha, V1)	2021-04-14	Europe	Germany	Thuringia		arnstadt	99310	50.8343	10.9456	29800	0
6166ba5b81e18c1c41ced0ac	1028840010	IIMK	ncov	Human	B.1.1.7	20I (Alpha, V1)	2021-04-13	Europe	Germany	Thuringia		sondershausen	99706	51.3677	10.8675	29805	0
6166ba5b81e18c1c41ced0ad	1050203684	IIMK	ncov	Human	B.1.1.7	20I (Alpha, V1)	2021-04-13	Europe	Germany	Thuringia		jena	7749	50.9283	11.5853	29800	0
6166ba5b81e18c1c41ced0ae	1050203772	IIMK	ncov	Human	B.1.1.7	20I (Alpha, V1)	2021-04-13	Europe	Germany	Thuringia		gera	7548	50.8753	12.0788	29800	0
6166ba5b81e18c1c41ced0b4	1091324516	IIMK	ncov	Human	B.1.1.7	20I (Alpha, V1)	2021-04-12	Europe	Germany	Thuringia		dingelstädt	37351	51.3156	10.3215	29799	0
6166ba5b81e18c1c41ced0b5	1091324518	IIMK	ncov	Human	B.1.1.7	20I (Alpha, V1)	2021-04-12	Europe	Germany	Thuringia		leinefelde	37327	51.3887	10.3268	29797	73
6166ba5b81e18c1c41ced0b8	1091324567	IIMK	ncov	Human	B.1.1.7	20I (Alpha, V1)	2021-04-12	Europe	Germany	Thuringia		arnstadt	99310	50.8343	10.9456	29800	0
6166ba5b81e18c1c41ced0bb	1091324628	IIMK	ncov	Human	B.1.1.7	20I (Alpha, V1)	2021-04-12	Europe	Germany	Thuringia		arnstadt	99310	50.8343	10.9456	29805	0
6166ba5b81e18c1c41ced0c3	1091324801	IIMK	ncov	Human	B.1.1.7	20I (Alpha, V1)	2021-04-12	Europe	Germany	Thuringia		mühlhausen	99974	51.2088	10.459	29805	186
6166ba5b81e18c1c41ced0c7	1091325720	IIMK	ncov	Human	B.1.1.7	20I (Alpha, V1)	2021-04-13	Europe	Germany	Thuringia		hermsdorf	7629	50.8961	11.8579	29804	0
6166ba5b81e18c1c41ced0c8	1091325796	IIMK	ncov	Human	B.1.1.7	20I (Alpha, V1)	2021-04-13	Europe	Germany	Thuringia		weimar	99423	50.9803	11.3272	29790	6
6166ba5b81e18c1c41ced0ca	1091325801	IIMK	ncov	Human	B.1.1.7	20I (Alpha, V1)	2021-04-13	Europe	Germany	Thuringia		weimar	99423	50.9803	11.3272	29796	176
6166ba5b81e18c1c41ced0cb	1091325809	IIMK	ncov	Human	B.1.1.7	20I (Alpha, V1)	2021-04-13	Europe	Germany	Thuringia		weimar	99423	50.9803	11.3272	29800	0
6166ba5b81e18c1c41ced047	1024587213	IIMK	ncov	Human	B.1.1.7	20I (Alpha, V1)	2021-04-12	Europe	Germany	Thuringia		heiligenstadt	37308	51.378	10.1376	29798	183
6166ba5b81e18c1c41ced04b	1024625820	IIMK	ncov	Human	B.1.1.7	20I (Alpha, V1)	2021-04-12	Europe	Germany	Thuringia		georgenthal/thür.wald	99887	50.8321	10.6627	29792	656
6166ba5b81e18c1c41ced055	1025082692	IIMK	ncov	Human	B.1.1.7	20I (Alpha, V1)	2021-04-12	Europe	Germany	Thuringia		crossen	7613	50.9646	11.984	29792	1034
6166ba5b81e18c1c41ced057	1027790029	IIMK	ncov	Human	B.1.1.7	20I (Alpha, V1)	2021-04-12	Europe	Germany	Thuringia		jena	7743	50.9283	11.5853	29799	0
6166ba5b81e18c1c41ced05c	1050202790	IIMK	ncov	Human	B.1.1.7	20I (Alpha, V1)	2021-04-12	Europe	Germany	Thuringia		berga/elster	7980	50.7503	12.1607	29794	978
6166ba5b81e18c1c41ced063	1091324467	IIMK	ncov	Human	B.1.1.7	20I (Alpha, V1)	2021-04-12	Europe	Germany	Thuringia		weimar	99423	50.9803	11.3272	29801	0
6166ba5b81e18c1c41ced064	1091324517	IIMK	ncov	Human	B.1.1.7	20I (Alpha, V1)	2021-04-12	Europe	Germany	Thuringia		leinefelde	37327	51.3887	10.3268	29801	0
6166ba5b81e18c1c41ced06a	1091324659	IIMK	ncov	Human	B.1.1.7	20I (Alpha, V1)	2021-04-12	Europe	Germany	Thuringia		arnstadt	99310	50.8343	10.9456	29799	0
6166ba5b81e18c1c41ced06b	1091324689	IIMK	ncov	Human	B.1.1.7	20I (Alpha, V1)	2021-04-12	Europe	Germany	Thuringia		arnstadt	99310	50.8343	10.9456	29805	0
6166ba5b81e18c1c41ced074	1091324829	IIMK	ncov	Human	B.1.1.7	20I (Alpha, V1)	2021-04-12	Europe	Germany	Thuringia		stadtroda	7646	50.86	11.7281	29810	0
6166ba5b81e18c1c41ced07b	1005971798	IIMK	ncov	Human	B.1.1.7	20I (Alpha, V1)	2021-04-13	Europe	Germany	Thuringia		weida	7570	50.7735	12.0614	29800	0
6166ba5b81e18c1c41ced07c	1007787692	IIMK	ncov	Human	B.1.1.7	20I (Alpha, V1)	2021-04-13	Europe	Germany	Thuringia		gera	7546	50.8753	12.0788	29797	0
6166ba5b81e18c1c41ced084	1024471131	IIMK	ncov	Human	B.1.1.7	20I (Alpha, V1)	2021-04-13	Europe	Germany	Thuringia		vacha	36404	50.8256	10.0231	29799	0
6166ba5b81e18c1c41ced092	1024625865	IIMK	ncov	Human	B.1.1.7	20I (Alpha, V1)	2021-04-12	Europe	Germany	Thuringia		tambach-dietharz	99897	50.7925	10.6157	29797	45
6166ba5b81e18c1c41ced0a1	1024625946	IIMK	ncov	Human	B.1.1.7	20I (Alpha, V1)	2021-04-14	Europe	Germany	Thuringia		dreigleichen	99869	50.8916	10.8103	29798	18
6166ba5b81e18c1c41ced0a2	1024625948	IIMK	ncov	Human	B.1.1.7	20I (Alpha, V1)	2021-04-14	Europe	Germany	Thuringia		gotha	99867	50.9461	10.6962	29799	3
6166ba5b81e18c1c41ced0a5	1024625951	IIMK	ncov	Human	B.1.1.7	20I (Alpha, V1)	2021-04-14	Europe	Germany	Thuringia		friedrichroda	99894	50.8575	10.5651	29798	42
6166ba5b81e18c1c41ced0b0	1091324399	IIMK	ncov	Human	B.1.1.7	20I (Alpha, V1)	2021-04-12	Europe	Germany	Thuringia		weimar	99423	50.9803	11.3272	29798	59
6166ba5b81e18c1c41ced0b1	1091324460	IIMK	ncov	Human	B.1.1.7	20I (Alpha, V1)	2021-04-12	Europe	Germany	Thuringia		weimar	99423	50.9803	11.3272	29803	70
6166ba5b81e18c1c41ced0b2	1091324470	IIMK	ncov	Human	B.1.1.7	20I (Alpha, V1)	2021-04-12	Europe	Germany	Thuringia		weimar	99423	50.9803	11.3272	29797	0
6166ba5b81e18c1c41ced0b6	1091324519	IIMK	ncov	Human	B.1.1.7	20I (Alpha, V1)	2021-04-12	Europe	Germany	Thuringia		leinefelde	37327	51.3887	10.3268	29799	0
6166ba5b81e18c1c41ced0ba	1091324609	IIMK	ncov	Human	B.1.1.7	20I (Alpha, V1)	2021-04-12	Europe	Germany	Thuringia		arnstadt	99310	50.8343	10.9456	29794	392
6166ba5b81e18c1c41ced0bd	1091324711	IIMK	ncov	Human	B.1.1.7	20I (Alpha, V1)	2021-04-12	Europe	Germany	Thuringia		arnstadt	99310	50.8343	10.9456	29807	0
6166ba5b81e18c1c41ced0c0	1091324730	IIMK	ncov	Human	B.1.1.7	20I (Alpha, V1)	2021-04-12	Europe	Germany	Thuringia		arnstadt	99310	50.8343	10.9456	29797	30
6166ba5b81e18c1c41ced0c2	1091324768	IIMK	ncov	Human	B.1.1.7	20I (Alpha, V1)	2021-04-12	Europe	Germany	Thuringia		arnstadt	99310	50.8343	10.9456	29799	193
6166ba5b81e18c1c41ced0c5	1091324822	IIMK	ncov	Human	B.1.1.7	20I (Alpha, V1)	2021-04-12	Europe	Germany	Thuringia		mühlhausen	99974	51.2088	10.459	29799	303
6166ba5b81e18c1c41ced0c6	1091325547	IIMK	ncov	Human	B.1.1.7	20I (Alpha, V1)	2021-04-13	Europe	Germany	Thuringia		jena	7743	50.9283	11.5853	29793	0
6166ba5b81e18c1c41ced0cf	1091326093	IIMK	ncov	Human	B.1.1.7	20I (Alpha, V1)	2021-04-13	Europe	Germany	Thuringia		arnstadt	99310	50.8343	10.9456	29800	0
6166ba5b81e18c1c41ced049	1024587215	IIMK	ncov	Human	B.1.1.7	20I (Alpha, V1)	2021-04-12	Europe	Germany	Thuringia		heiligenstadt	37308	51.378	10.1376	29800	0
6166ba5b81e18c1c41ced04c	1024625826	IIMK	ncov	Human	B.1.1.7	20I (Alpha, V1)	2021-04-12	Europe	Germany	Thuringia		gotha	99867	50.9461	10.6962	29808	0
6166ba5b81e18c1c41ced04d	1024625841	IIMK	ncov	Human	B.1.1.7	20I (Alpha, V1)	2021-04-12	Europe	Germany	Thuringia		gotha	99867	50.9461	10.6962	29805	0
6166ba5b81e18c1c41ced058	1027790030	IIMK	ncov	Human	B.1.1.7	20I (Alpha, V1)	2021-04-12	Europe	Germany	Thuringia		jena	7743	50.9283	11.5853	29796	186
6166ba5b81e18c1c41ced05a	1027790038	IIMK	ncov	Human	B.1.1.7	20I (Alpha, V1)	2021-04-12	Europe	Germany	Thuringia		jena	7743	50.9283	11.5853	29811	0
6166ba5b81e18c1c41ced060	1050203786	IIMK	ncov	Human	B.1.1.7	20I (Alpha, V1)	2021-04-13	Europe	Germany	Thuringia		weida	7570	50.7735	12.0614	29794	532
6166ba5b81e18c1c41ced062	1091323376	IIMK	ncov	Human	B.1.1.7	20I (Alpha, V1)	2021-04-12	Europe	Germany	Thuringia		arnstadt	99310	50.8343	10.9456	29797	188
6166ba5b81e18c1c41ced068	1091324637	IIMK	ncov	Human	B.1.1.7	20I (Alpha, V1)	2021-04-12	Europe	Germany	Thuringia		arnstadt	99310	50.8343	10.9456	29797	178
6166ba5b81e18c1c41ced06c	1091324745	IIMK	ncov	Human	B.1.1.7	20I (Alpha, V1)	2021-04-12	Europe	Germany	Thuringia		arnstadt	99310	50.8343	10.9456	29799	0
6166ba5b81e18c1c41ced06e	1091324782	IIMK	ncov	Human	B.1.1.7	20I (Alpha, V1)	2021-04-12	Europe	Germany	Thuringia		arnstadt	99310	50.8343	10.9456	29799	9
6166ba5b81e18c1c41ced070	1091324793	IIMK	ncov	Human	B.1.1.7	20I (Alpha, V1)	2021-04-12	Europe	Germany	Thuringia		bad langensalza	99947	51.1089	10.6475	29800	0
6166ba5b81e18c1c41ced072	1091324810	IIMK	ncov	Human	B.1.1.7	20I (Alpha, V1)	2021-04-12	Europe	Germany	Thuringia		schlotheim	99994	51.2491	10.6615	29800	0
6166ba5b81e18c1c41ced07f	1024083629	IIMK	ncov	Human	B.1.1.7	20I (Alpha, V1)	2021-04-12	Europe	Germany	Thuringia		heldrungen	6577	51.2989	11.219	29798	0
6166ba5b81e18c1c41ced081	1024085121	IIMK	ncov	Human	B.1.1.7	20I (Alpha, V1)	2021-04-12	Europe	Germany	Thuringia		ebeleben	99713	51.2847	10.7319	29794	592
6166ba5b81e18c1c41ced085	1024550773	IIMK	ncov	Human	B.1.1.7	20I (Alpha, V1)	2021-04-13	Europe	Germany	Thuringia		kölleda	99625	51.1878	11.2461	29805	0
6166ba5b81e18c1c41ced086	1024550778	IIMK	ncov	Human	B.1.1.7	20I (Alpha, V1)	2021-04-13	Europe	Germany	Thuringia		sömmerda	99610	51.1627	11.1157	29808	0
6166ba5b81e18c1c41ced088	1024587234	IIMK	ncov	Human	B.1.1.7	20I (Alpha, V1)	2021-04-13	Europe	Germany	Thuringia		heiligenstadt	37308	51.378	10.1376	29799	0
6166ba5b81e18c1c41ced095	1024625890	IIMK	ncov	Human	B.1.1.7	20I (Alpha, V1)	2021-04-14	Europe	Germany	Thuringia		gotha	99867	50.9461	10.6962	29801	90
6166ba5b81e18c1c41ced097	1024625894	IIMK	ncov	Human	B.1.1.7	20I (Alpha, V1)	2021-04-14	Europe	Germany	Thuringia		gotha	99867	50.9461	10.6962	29800	522
6166ba5b81e18c1c41ced099	1024625918	IIMK	ncov	Human	B.1.1.7	20I (Alpha, V1)	2021-04-14	Europe	Germany	Thuringia		gotha	99867	50.9461	10.6962	29797	569
6166ba5b81e18c1c41ced09b	1024625922	IIMK	ncov	Human	B.1.1.7	20I (Alpha, V1)	2021-04-14	Europe	Germany	Thuringia		gotha	99867	50.9461	10.6962	29800	0
6166ba5b81e18c1c41ced0a0	1024625942	IIMK	ncov	Human	B.1.1.7	20I (Alpha, V1)	2021-04-14	Europe	Germany	Thuringia		tambach-dietharz	99897	50.7925	10.6157	29796	9
6166ba5b81e18c1c41ced0a7	1024628508	IIMK	ncov	Human	B.1.1.7	20I (Alpha, V1)	2021-04-12	Europe	Germany	Thuringia		gotha	99867	50.9461	10.6962	29805	199
6166ba5b81e18c1c41ced0a8	1024628509	IIMK	ncov	Human	B.1.1.7	20I (Alpha, V1)	2021-04-12	Europe	Germany	Thuringia		gotha	99867	50.9461	10.6962	29798	45
6166ba5b81e18c1c41ced0a9	1025082709	IIMK	ncov	Human	B.1.1.7	20I (Alpha, V1)	2021-04-12	Europe	Germany	Thuringia		gera	7552	50.8753	12.0788	29792	736
6166ba5b81e18c1c41ced0af	1091324394	IIMK	ncov	Human	B.1.1.7	20I (Alpha, V1)	2021-04-12	Europe	Germany	Thuringia		weimar	99423	50.9803	11.3272	29805	7
6166ba5b81e18c1c41ced0b3	1091324474	IIMK	ncov	Human	B.1.1.7	20I (Alpha, V1)	2021-04-12	Europe	Germany	Thuringia		weimar	99423	50.9803	11.3272	29807	0
6166ba5b81e18c1c41ced0c1	1091324739	IIMK	ncov	Human	B.1.1.7	20I (Alpha, V1)	2021-04-12	Europe	Germany	Thuringia		arnstadt	99310	50.8343	10.9456	29808	0
6166ba5b81e18c1c41ced0c9	1091325799	IIMK	ncov	Human	B.1.1.7	20I (Alpha, V1)	2021-04-13	Europe	Germany	Thuringia		weimar	99423	50.9803	11.3272	29798	37
6166ba5b81e18c1c41ced0cc	1091325838	IIMK	ncov	Human	B.1.1.7	20I (Alpha, V1)	2021-04-13	Europe	Germany	Thuringia		weimar	99423	50.9803	11.3272	29804	0
6166ba5b81e18c1c41ced0cd	1091325854	IIMK	ncov	Human	B.1.1.7	20I (Alpha, V1)	2021-04-13	Europe	Germany	Thuringia		weimar	99423	50.9803	11.3272	29798	0
6166ba5b81e18c1c41ced0d0	1091326243	IIMK	ncov	Human	B.1.1.7	20I (Alpha, V1)	2021-04-14	Europe	Germany	Thuringia		arnstadt	99310	50.8343	10.9456	29804	0
6166ba5b81e18c1c41ced04a	1024625817	IIMK	ncov	Human	B.1.1.7	20I (Alpha, V1)	2021-04-12	Europe	Germany	Thuringia		georgenthal/thür.wald	99887	50.8321	10.6627	29792	553
6166ba5b81e18c1c41ced04e	1024625844	IIMK	ncov	Human	B.1.1.7	20I (Alpha, V1)	2021-04-12	Europe	Germany	Thuringia		gotha	99867	50.9461	10.6962	29797	783
6166ba5b81e18c1c41ced04f	1024625847	IIMK	ncov	Human	B.1.1.7	20I (Alpha, V1)	2021-04-12	Europe	Germany	Thuringia		gotha	99867	50.9461	10.6962	29803	0
6166ba5b81e18c1c41ced050	1024625848	IIMK	ncov	Human	B.1.1.7	20I (Alpha, V1)	2021-04-12	Europe	Germany	Thuringia		ohrdruf	99885	50.8288	10.7341	29800	0
6166ba5b81e18c1c41ced051	1024625851	IIMK	ncov	Human	B.1.1.7	20I (Alpha, V1)	2021-04-12	Europe	Germany	Thuringia		ohrdruf	99885	50.8288	10.7341	29799	119
6166ba5b81e18c1c41ced053	1024625874	IIMK	ncov	Human	B.1.1.7	20I (Alpha, V1)	2021-04-12	Europe	Germany	Thuringia		dreigleichen	99869	50.8916	10.8103	29797	167
6166ba5b81e18c1c41ced054	1024628510	IIMK	ncov	Human	B.1.1.7	20I (Alpha, V1)	2021-04-12	Europe	Germany	Thuringia		gotha	99867	50.9461	10.6962	29797	184
6166ba5b81e18c1c41ced056	1027790008	IIMK	ncov	Human	B.1.1.7	20I (Alpha, V1)	2021-04-12	Europe	Germany	Thuringia		jena	7743	50.9283	11.5853	29797	78
6166ba5b81e18c1c41ced059	1027790037	IIMK	ncov	Human	B.1.1.7	20I (Alpha, V1)	2021-04-12	Europe	Germany	Thuringia		jena	7743	50.9283	11.5853	29811	0
6166ba5b81e18c1c41ced05d	1050203079	IIMK	ncov	Human	B.1.1.7	20I (Alpha, V1)	2021-04-12	Europe	Germany	Thuringia		gera	7552	50.8753	12.0788	29803	0
6166ba5b81e18c1c41ced05f	1050203545	IIMK	ncov	Human	B.1.1.7	20I (Alpha, V1)	2021-04-12	Europe	Germany	Thuringia		gera	7548	50.8753	12.0788	29796	635
6166ba5b81e18c1c41ced066	1091324613	IIMK	ncov	Human	B.1.1.7	20I (Alpha, V1)	2021-04-12	Europe	Germany	Thuringia		arnstadt	99310	50.8343	10.9456	29801	0
6166ba5b81e18c1c41ced071	1091324803	IIMK	ncov	Human	B.1.1.7	20I (Alpha, V1)	2021-04-12	Europe	Germany	Thuringia		bad tennstedt	99955	51.1537	10.8384	29803	0
6166ba5b81e18c1c41ced073	1091324828	IIMK	ncov	Human	B.1.1.7	20I (Alpha, V1)	2021-04-12	Europe	Germany	Thuringia		jena	7745	50.9283	11.5853	29800	0
6166ba5b81e18c1c41ced075	1091324830	IIMK	ncov	Human	B.1.1.7	20I (Alpha, V1)	2021-04-12	Europe	Germany	Thuringia		jena	7747	50.9283	11.5853	29799	0
6166ba5b81e18c1c41ced076	1091324832	IIMK	ncov	Human	B.1.1.7	20I (Alpha, V1)	2021-04-12	Europe	Germany	Thuringia		jena	7743	50.9283	11.5853	29811	0
6166ba5b81e18c1c41ced07a	1091324949	IIMK	ncov	Human	B.1.1.7	20I (Alpha, V1)	2021-04-13	Europe	Germany	Thuringia		erfurt	99097	50.9775	11.0251	29884	72
6166ba5b81e18c1c41ced07d	1009018555	IIMK	ncov	Human	B.1.1.7	20I (Alpha, V1)	2021-04-13	Europe	Germany	Thuringia		stadtroda	7646	50.86	11.7281	29800	229
6166ba5b81e18c1c41ced080	1024083640	IIMK	ncov	Human	B.1.1.7	20I (Alpha, V1)	2021-04-12	Europe	Germany	Thuringia		illingen	6577	48.972	8.91847	29792	710
6166ba5b81e18c1c41ced087	1024587173	IIMK	ncov	Human	B.1.1.7	20I (Alpha, V1)	2021-04-12	Europe	Germany	Thuringia		arenshausen	37318	51.3624	10.0721	29783	860
6166ba5b81e18c1c41ced089	1024625698	IIMK	ncov	Human	B.1.1.7	20I (Alpha, V1)	2021-04-14	Europe	Germany	Thuringia		friedrichroda	99894	50.8575	10.5651	29807	48
6166ba5b81e18c1c41ced08a	1024625814	IIMK	ncov	Human	B.1.1.7	20I (Alpha, V1)	2021-04-12	Europe	Germany	Thuringia		gotha	99867	50.9461	10.6962	29800	268
6166ba5b81e18c1c41ced08b	1024625827	IIMK	ncov	Human	B.1.1.7	20I (Alpha, V1)	2021-04-12	Europe	Germany	Thuringia		dreigleichen	99869	50.8916	10.8103	29798	189
6166ba5b81e18c1c41ced08d	1024625830	IIMK	ncov	Human	B.1.1.7	20I (Alpha, V1)	2021-04-12	Europe	Germany	Thuringia		friedrichroda	99894	50.8575	10.5651	29799	74
6166ba5b81e18c1c41ced08e	1024625849	IIMK	ncov	Human	B.1.1.7	20I (Alpha, V1)	2021-04-12	Europe	Germany	Thuringia		gotha	99867	50.9461	10.6962	29785	788
6166ba5b81e18c1c41ced091	1024625862	IIMK	ncov	Human	B.1.1.7	20I (Alpha, V1)	2021-04-12	Europe	Germany	Thuringia		gotha	99867	50.9461	10.6962	29798	89
6166ba5b81e18c1c41ced094	1024625883	IIMK	ncov	Human	B.1.1.7	20I (Alpha, V1)	2021-04-14	Europe	Germany	Thuringia		dreigleichen	99869	50.8916	10.8103	29799	0
6166ba5b81e18c1c41ced09a	1024625919	IIMK	ncov	Human	B.1.1.7	20I (Alpha, V1)	2021-04-14	Europe	Germany	Thuringia		dreigleichen	99869	50.8916	10.8103	29800	2
6166ba5b81e18c1c41ced09c	1024625932	IIMK	ncov	Human	B.1.1.7	20I (Alpha, V1)	2021-04-14	Europe	Germany	Thuringia		gotha	99867	50.9461	10.6962	29800	0
6166ba5b81e18c1c41ced09d	1024625934	IIMK	ncov	Human	B.1.1.7	20I (Alpha, V1)	2021-04-14	Europe	Germany	Thuringia		friedrichroda	99894	50.8575	10.5651	29805	69
6166ba5b81e18c1c41ced0a3	1024625949	IIMK	ncov	Human	B.1.1.7	20I (Alpha, V1)	2021-04-14	Europe	Germany	Thuringia		großfahner	99100	51.0558	10.8271	29797	97
6166ba5b81e18c1c41ced0a6	1024625954	IIMK	ncov	Human	B.1.1.7	20I (Alpha, V1)	2021-04-14	Europe	Germany	Thuringia		tambach-dietharz	99897	50.7925	10.6157	29799	0
6166ba5b81e18c1c41ced0aa	1028300936	IIMK	ncov	Human	B.1.1.7	20I (Alpha, V1)	2021-04-12	Europe	Germany	Thuringia		kyffhäuserland	99707	51.371	11.0077	29796	778
6166ba5b81e18c1c41ced0ab	1028301403	IIMK	ncov	Human	B.1.1.7	20I (Alpha, V1)	2021-04-13	Europe	Germany	Thuringia		greußen	99718	51.2286	10.9491	29801	0
6166ba5b81e18c1c41ced0b7	1091324543	IIMK	ncov	Human	B.1.1.7	20I (Alpha, V1)	2021-04-12	Europe	Germany	Thuringia		arnstadt	99310	50.8343	10.9456	29796	161
6166ba5b81e18c1c41ced0b9	1091324570	IIMK	ncov	Human	B.1.1.7	20I (Alpha, V1)	2021-04-12	Europe	Germany	Thuringia		worbis	37339	51.4188	10.3625	29802	74
6166ba5b81e18c1c41ced0bc	1091324641	IIMK	ncov	Human	B.1.1.7	20I (Alpha, V1)	2021-04-12	Europe	Germany	Thuringia		arnstadt	99310	50.8343	10.9456	29796	327
6166ba5b81e18c1c41ced0be	1091324726	IIMK	ncov	Human	B.1.1.7	20I (Alpha, V1)	2021-04-12	Europe	Germany	Thuringia		arnstadt	99310	50.8343	10.9456	29798	51
6166ba5b81e18c1c41ced0bf	1091324728	IIMK	ncov	Human	B.1.1.7	20I (Alpha, V1)	2021-04-12	Europe	Germany	Thuringia		arnstadt	99310	50.8343	10.9456	29807	0
6166ba5b81e18c1c41ced0c4	1091324807	IIMK	ncov	Human	B.1.1.7	20I (Alpha, V1)	2021-04-12	Europe	Germany	Thuringia		mühlhausen	99974	51.2088	10.459	29799	0
6166ba5b81e18c1c41ced0ce	1091325939	IIMK	ncov	Human	B.1.1.7	20I (Alpha, V1)	2021-04-13	Europe	Germany	Thuringia		arnstadt	99310	50.8343	10.9456	29797	84
6166ba5b81e18c1c41ced0d3	1050205132	IIMK	ncov	Human	B.1.1.7	20I (Alpha, V1)	2021-04-14	Europe	Germany	Thuringia		weida	7570	50.7735	12.0614	29800	0
6166ba5b81e18c1c41ced0d1	1024587245	IIMK	ncov	Human	B.1.1.7	20I (Alpha, V1)	2021-04-13	Europe	Germany	Thuringia		heiligenstadt	37308	51.378	10.1376	29802	0
6166ba5b81e18c1c41ced0d4	1091328023	IIMK	ncov	Human	B.1.1.7	20I (Alpha, V1)	2021-04-15	Europe	Germany	Thuringia		bleicherode	99752	51.4677	10.5922	29805	0
6166ba5b81e18c1c41ced0d8	1091328027	IIMK	ncov	Human	B.1.1.7	20I (Alpha, V1)	2021-04-15	Europe	Germany	Thuringia		nordhausen	99734	51.4946	10.7878	29806	72
6166ba5b81e18c1c41ced0d9	1004352117	IIMK	ncov	Human	B.1.1.7	20I (Alpha, V1)	2021-04-14	Europe	Germany	Thuringia		gera	7549	50.8753	12.0788	29813	0
6166ba5b81e18c1c41ced0e0	1024085176	IIMK	ncov	Human	B.1.1.7	20I (Alpha, V1)	2021-04-16	Europe	Germany	Thuringia		greußen	99718	51.2286	10.9491	29799	0
6166ba5b81e18c1c41ced0e2	1024085236	IIMK	ncov	Human	B.1.1.7	20I (Alpha, V1)	2021-04-14	Europe	Germany	Thuringia		sondershausen	99706	51.3677	10.8675	29798	0
6166ba5b81e18c1c41ced0e4	1024465025	IIMK	ncov	Human	B.1.1.7	20I (Alpha, V1)	2021-04-15	Europe	Germany	Thuringia		weimar	99425	50.9803	11.3272	29792	1
6166ba5b81e18c1c41ced0e5	1024471135	IIMK	ncov	Human	B.1.1.7	20I (Alpha, V1)	2021-04-13	Europe	Germany	Thuringia		bad salzungen	36433	50.8117	10.2327	29799	113
6166ba5b81e18c1c41ced0e8	1024550777	IIMK	ncov	Human	B.1.1.7	20I (Alpha, V1)	2021-04-13	Europe	Germany	Thuringia		sömmerda	99610	51.1627	11.1157	29797	396
6166ba5b81e18c1c41ced0ed	1024550808	IIMK	ncov	Human	B.1.1.7	20I (Alpha, V1)	2021-04-14	Europe	Germany	Thuringia		sömmerda	99610	51.1627	11.1157	29817	0
6166ba5b81e18c1c41ced0ef	1024550818	IIMK	ncov	Human	B.1.1.7	20I (Alpha, V1)	2021-04-15	Europe	Germany	Thuringia		rastenberg	99636	51.1757	11.4201	29794	0
6166ba5b81e18c1c41ced0f2	1024587256	IIMK	ncov	Human	B.1.1.7	20I (Alpha, V1)	2021-04-13	Europe	Germany	Thuringia		worbis	37339	51.4188	10.3625	29792	812
6166ba5b81e18c1c41ced0f5	1024587269	IIMK	ncov	Human	B.1.1.7	20I (Alpha, V1)	2021-04-13	Europe	Germany	Thuringia		heiligenstadt	37308	51.378	10.1376	29800	16
6166ba5b81e18c1c41ced0fa	1024587320	IIMK	ncov	Human	B.1.1.7	20I (Alpha, V1)	2021-04-14	Europe	Germany	Thuringia		leinefelde	37327	51.3887	10.3268	29797	103
6166ba5b81e18c1c41ced0ff	1024587374	IIMK	ncov	Human	B.1.1.7	20I (Alpha, V1)	2021-04-15	Europe	Germany	Thuringia		heiligenstadt	37308	51.378	10.1376	29800	0
6166ba5b81e18c1c41ced100	1024587380	IIMK	ncov	Human	B.1.1.7	20I (Alpha, V1)	2021-04-15	Europe	Germany	Thuringia		heiligenstadt	37308	51.378	10.1376	29805	0
6166ba5b81e18c1c41ced102	1024625878	IIMK	ncov	Human	B.1.1.7	20I (Alpha, V1)	2021-04-14	Europe	Germany	Thuringia		dreigleichen	99869	50.8916	10.8103	29794	292
6166ba5b81e18c1c41ced103	1024625884	IIMK	ncov	Human	B.1.1.7	20I (Alpha, V1)	2021-04-14	Europe	Germany	Thuringia		dreigleichen	99869	50.8916	10.8103	29796	370
6166ba5b81e18c1c41ced104	1024625917	IIMK	ncov	Human	B.1.1.7	20I (Alpha, V1)	2021-04-14	Europe	Germany	Thuringia		gotha	99867	50.9461	10.6962	29786	569
6166ba5b81e18c1c41ced10b	1024625957	IIMK	ncov	Human	B.1.1.7	20I (Alpha, V1)	2021-04-14	Europe	Germany	Thuringia		dreigleichen	99869	50.8916	10.8103	29800	0
6166ba5b81e18c1c41ced112	1024625990	IIMK	ncov	Human	B.1.1.7	20I (Alpha, V1)	2021-04-15	Europe	Germany	Thuringia		georgenthal/thür.wald	99887	50.8321	10.6627	29797	18
6166ba5b81e18c1c41ced113	1024625991	IIMK	ncov	Human	B.1.1.7	20I (Alpha, V1)	2021-04-16	Europe	Germany	Thuringia		georgenthal/thür.wald	99887	50.8321	10.6627	29799	4
6166ba5b81e18c1c41ced115	1024625999	IIMK	ncov	Human	B.1.1.7	20I (Alpha, V1)	2021-04-16	Europe	Germany	Thuringia		ohrdruf	99885	50.8288	10.7341	29807	0
6166ba5b81e18c1c41ced119	1024628526	IIMK	ncov	Human	B.1.1.7	20I (Alpha, V1)	2021-04-16	Europe	Germany	Thuringia		gotha	99867	50.9461	10.6962	29807	7
6166ba5b81e18c1c41ced11d	1025082716	IIMK	ncov	Human	B.1.1.7	20I (Alpha, V1)	2021-04-14	Europe	Germany	Thuringia		crossen	7613	50.9646	11.984	29799	7
6166ba5b81e18c1c41ced11f	1025082734	IIMK	ncov	Human	B.1.1.7	20I (Alpha, V1)	2021-04-14	Europe	Germany	Thuringia		kahla	7768	50.802	11.5882	29797	86
6166ba5b81e18c1c41ced121	1025082782	IIMK	ncov	Human	B.1.1.7	20I (Alpha, V1)	2021-04-14	Europe	Germany	Thuringia		crossen	7613	50.9646	11.984	29796	1067
6166ba5b81e18c1c41ced129	1025083011	IIMK	ncov	Human	B.1.1.7	20I (Alpha, V1)	2021-04-14	Europe	Germany	Thuringia		stadtroda	7646	50.86	11.7281	29797	184
6166ba5b81e18c1c41ced12b	1027540072	IIMK	ncov	Human	B.1.1.7	20I (Alpha, V1)	2021-04-14	Europe	Germany	Thuringia		weimar	99423	50.9803	11.3272	29805	94
6166ba5b81e18c1c41ced12d	1027890013	IIMK	ncov	Human	B.1.1.7	20I (Alpha, V1)	2021-04-15	Europe	Germany	Thuringia		jena	7747	50.9283	11.5853	29803	0
6166ba5b81e18c1c41ced137	1050206343	IIMK	ncov	Human	B.1.1.7	20I (Alpha, V1)	2021-04-14	Europe	Germany	Thuringia		gera	7546	50.8753	12.0788	29794	654
6166ba5b81e18c1c41ced139	1050207151	IIMK	ncov	Human	B.1.1.7	20I (Alpha, V1)	2021-04-15	Europe	Germany	Thuringia		gera	7549	50.8753	12.0788	29794	390
6166ba5b81e18c1c41ced13d	1091325784	IIMK	ncov	Human	B.1.1.7	20I (Alpha, V1)	2021-04-13	Europe	Germany	Thuringia		weimar	99423	50.9803	11.3272	29797	273
6166ba5b81e18c1c41ced140	1091325866	IIMK	ncov	Human	B.1.1.7	20I (Alpha, V1)	2021-04-13	Europe	Germany	Thuringia		worbis	37339	51.4188	10.3625	29799	35
6166ba5b81e18c1c41ced148	1091326176	IIMK	ncov	Human	B.1.1.7	20I (Alpha, V1)	2021-04-14	Europe	Germany	Thuringia		arnstadt	99310	50.8343	10.9456	29792	655
6166ba5b81e18c1c41ced14a	1091327109	IIMK	ncov	Human	B.1.1.7	20I (Alpha, V1)	2021-04-14	Europe	Germany	Thuringia		weimar	99423	50.9803	11.3272	29797	255
6166ba5b81e18c1c41ced14c	1091327115	IIMK	ncov	Human	B.1.1.7	20I (Alpha, V1)	2021-04-14	Europe	Germany	Thuringia		weimar	99423	50.9803	11.3272	29788	508
6166ba5b81e18c1c41ced153	1091327239	IIMK	ncov	Human	B.1.1.7	20I (Alpha, V1)	2021-04-14	Europe	Germany	Thuringia		weimar	99423	50.9803	11.3272	29802	0
6166ba5b81e18c1c41ced15c	1091327322	IIMK	ncov	Human	B.1.1.7	20I (Alpha, V1)	2021-04-14	Europe	Germany	Thuringia		schlotheim	99994	51.2491	10.6615	29809	15
6166ba5b81e18c1c41ced15e	1091327368	IIMK	ncov	Human	B.1.1.7	20I (Alpha, V1)	2021-04-14	Europe	Germany	Thuringia		arnstadt	99310	50.8343	10.9456	29807	0
6166ba5b81e18c1c41ced163	1091327454	IIMK	ncov	Human	B.1.1.7	20I (Alpha, V1)	2021-04-14	Europe	Germany	Thuringia		arnstadt	99310	50.8343	10.9456	29800	0
6166ba5b81e18c1c41ced164	1091327471	IIMK	ncov	Human	B.1.1.7	20I (Alpha, V1)	2021-04-14	Europe	Germany	Thuringia		arnstadt	99310	50.8343	10.9456	29796	1127
6166ba5b81e18c1c41ced169	1091328600	IIMK	ncov	Human	B.1.1.7	20I (Alpha, V1)	2021-04-15	Europe	Germany	Thuringia		mühlhausen	99961	51.2088	10.459	29799	0
6166ba5b81e18c1c41ced16e	1091328640	IIMK	ncov	Human	B.1.1.7	20I (Alpha, V1)	2021-04-15	Europe	Germany	Thuringia		rudolstadt	7407	50.7193	11.34	29814	0
6166ba5b81e18c1c41ced16f	1091328641	IIMK	ncov	Human	B.1.1.7	20I (Alpha, V1)	2021-04-15	Europe	Germany	Thuringia		jena	7743	50.9283	11.5853	29815	0
6166ba5b81e18c1c41ced170	1091328642	IIMK	ncov	Human	B.1.1.7	20I (Alpha, V1)	2021-04-15	Europe	Germany	Thuringia		jena	7743	50.9283	11.5853	29807	0
6166ba5b81e18c1c41ced17d	1091328765	IIMK	ncov	Human	B.1.1.7	20I (Alpha, V1)	2021-04-16	Europe	Germany	Thuringia		arnstadt	99310	50.8343	10.9456	29798	316
6166ba5b81e18c1c41ced17e	1091328768	IIMK	ncov	Human	B.1.1.7	20I (Alpha, V1)	2021-04-16	Europe	Germany	Thuringia		arnstadt	99310	50.8343	10.9456	29807	0
6166ba5b81e18c1c41ced183	1091328820	IIMK	ncov	Human	B.1.1.7	20I (Alpha, V1)	2021-04-16	Europe	Germany	Thuringia		arnstadt	99310	50.8343	10.9456	29807	61
6166ba5b81e18c1c41ced186	1091328841	IIMK	ncov	Human	B.1.1.7	20I (Alpha, V1)	2021-04-16	Europe	Germany	Thuringia		arnstadt	99310	50.8343	10.9456	29798	2
6166ba5b81e18c1c41ced187	1091328848	IIMK	ncov	Human	B.1.1.7	20I (Alpha, V1)	2021-04-16	Europe	Germany	Thuringia		arnstadt	99310	50.8343	10.9456	29799	0
6166ba5b81e18c1c41ced188	1091328850	IIMK	ncov	Human	B.1.1.7	20I (Alpha, V1)	2021-04-16	Europe	Germany	Thuringia		arnstadt	99310	50.8343	10.9456	29807	0
6166ba5b81e18c1c41ced18a	1091328889	IIMK	ncov	Human	B.1.1.7	20I (Alpha, V1)	2021-04-16	Europe	Germany	Thuringia		arnstadt	99310	50.8343	10.9456	29805	0
6166ba5b81e18c1c41ced18e	1091328913	IIMK	ncov	Human	B.1.1.7	20I (Alpha, V1)	2021-04-16	Europe	Germany	Thuringia		arnstadt	99310	50.8343	10.9456	29807	18
6166ba5b81e18c1c41ced190	1091328919	IIMK	ncov	Human	B.1.1.7	20I (Alpha, V1)	2021-04-16	Europe	Germany	Thuringia		arnstadt	99310	50.8343	10.9456	29805	0
6166ba5b81e18c1c41ced191	1000421387	IIMK	ncov	Human	B.1.1.7	20I (Alpha, V1)	2021-04-15	Europe	Germany	Thuringia		erfurt	99084	50.9775	11.0251	29805	0
6166ba5b81e18c1c41ced193	1000421785	IIMK	ncov	Human	B.1.1.7	20I (Alpha, V1)	2021-04-15	Europe	Germany	Thuringia		erfurt	99084	50.9775	11.0251	29797	562
6166ba5b81e18c1c41ced196	1007021198	IIMK	ncov	Human	B.1.1.7	20I (Alpha, V1)	2021-04-14	Europe	Germany	Thuringia		gera	7548	50.8753	12.0788	29797	564
6166ba5b81e18c1c41ced19c	1011251053	IIMK	ncov	Human	B.1.1.7	20I (Alpha, V1)	2021-04-15	Europe	Germany	Thuringia		bad köstritz	7586	50.9301	12.0118	29807	223
6166ba5b81e18c1c41ced1a1	1024085241	IIMK	ncov	Human	B.1.1.7	20I (Alpha, V1)	2021-04-14	Europe	Germany	Thuringia		sondershausen	99706	51.3677	10.8675	29796	495
6166ba5b81e18c1c41ced1a5	1024471149	IIMK	ncov	Human	B.1.1.7	20I (Alpha, V1)	2021-04-15	Europe	Germany	Thuringia		bad salzungen	36433	50.8117	10.2327	29807	0
6166ba5b81e18c1c41ced0d5	1091328024	IIMK	ncov	Human	B.1.1.7	20I (Alpha, V1)	2021-04-15	Europe	Germany	Thuringia		bleicherode	99752	51.4677	10.5922	29806	0
6166ba5b81e18c1c41ced0d6	1091328025	IIMK	ncov	Human	B.1.1.7	20I (Alpha, V1)	2021-04-15	Europe	Germany	Thuringia		bleicherode	99752	51.4677	10.5922	29807	0
6166ba5b81e18c1c41ced0dd	1024082268	IIMK	ncov	Human	B.1.1.7	20I (Alpha, V1)	2021-04-14	Europe	Germany	Thuringia		greußen	99718	51.2286	10.9491	29805	0
6166ba5b81e18c1c41ced0e7	1024550776	IIMK	ncov	Human	B.1.1.7	20I (Alpha, V1)	2021-04-13	Europe	Germany	Thuringia		sömmerda	99610	51.1627	11.1157	29799	86
6166ba5b81e18c1c41ced0ec	1024550807	IIMK	ncov	Human	B.1.1.7	20I (Alpha, V1)	2021-04-14	Europe	Germany	Thuringia		sömmerda	99610	51.1627	11.1157	29802	0
6166ba5b81e18c1c41ced0f6	1024587270	IIMK	ncov	Human	B.1.1.7	20I (Alpha, V1)	2021-04-13	Europe	Germany	Thuringia		worbis	37339	51.4188	10.3625	29790	864
6166ba5b81e18c1c41ced0f7	1024587275	IIMK	ncov	Human	B.1.1.7	20I (Alpha, V1)	2021-04-14	Europe	Germany	Thuringia		am ohmberg	37345	51.5385	10.4226	29790	1323
6166ba5b81e18c1c41ced0f9	1024587286	IIMK	ncov	Human	B.1.1.7	20I (Alpha, V1)	2021-04-14	Europe	Germany	Thuringia		am ohmberg	37345	51.5385	10.4226	29796	1049
6166ba5b81e18c1c41ced0fc	1024587361	IIMK	ncov	Human	B.1.1.7	20I (Alpha, V1)	2021-04-15	Europe	Germany	Thuringia		worbis	37339	51.4188	10.3625	29807	0
6166ba5b81e18c1c41ced101	1024625840	IIMK	ncov	Human	B.1.1.7	20I (Alpha, V1)	2021-04-12	Europe	Germany	Thuringia		dreigleichen	99869	50.8916	10.8103	29794	897
6166ba5b81e18c1c41ced110	1024625984	IIMK	ncov	Human	B.1.1.7	20I (Alpha, V1)	2021-04-15	Europe	Germany	Thuringia		ohrdruf	99885	50.8288	10.7341	29799	15
6166ba5b81e18c1c41ced111	1024625986	IIMK	ncov	Human	B.1.1.7	20I (Alpha, V1)	2021-04-16	Europe	Germany	Thuringia		dreigleichen	99869	50.8916	10.8103	29803	41
6166ba5b81e18c1c41ced116	1024626000	IIMK	ncov	Human	B.1.1.7	20I (Alpha, V1)	2021-04-15	Europe	Germany	Thuringia		gotha	99867	50.9461	10.6962	29807	17
6166ba5b81e18c1c41ced117	1024628523	IIMK	ncov	Human	B.1.1.7	20I (Alpha, V1)	2021-04-16	Europe	Germany	Thuringia		gotha	99867	50.9461	10.6962	29807	0
6166ba5b81e18c1c41ced118	1024628525	IIMK	ncov	Human	B.1.1.7	20I (Alpha, V1)	2021-04-16	Europe	Germany	Thuringia		gotha	99867	50.9461	10.6962	29807	0
6166ba5b81e18c1c41ced11c	1024628544	IIMK	ncov	Human	B.1.1.7	20I (Alpha, V1)	2021-04-15	Europe	Germany	Thuringia		gotha	99867	50.9461	10.6962	29797	0
6166ba5b81e18c1c41ced11e	1025082721	IIMK	ncov	Human	B.1.1.7	20I (Alpha, V1)	2021-04-14	Europe	Germany	Thuringia		nordhausen	99734	51.4946	10.7878	29799	0
6166ba5b81e18c1c41ced126	1025082791	IIMK	ncov	Human	Q.1	20I (Alpha, V1)	2021-04-14	Europe	Germany	Thuringia		eisenberg	7607	50.9689	11.8964	29747	1203
6166ba5b81e18c1c41ced128	1025082859	IIMK	ncov	Human	B.1.1.7	20I (Alpha, V1)	2021-04-15	Europe	Germany	Thuringia		eisenberg	7607	50.9689	11.8964	29799	0
6166ba5b81e18c1c41ced12a	1025083012	IIMK	ncov	Human	B.1.1.7	20I (Alpha, V1)	2021-04-14	Europe	Germany	Thuringia		stadtroda	7646	50.86	11.7281	29797	180
6166ba5b81e18c1c41ced12c	1027890012	IIMK	ncov	Human	B.1.1.7	20I (Alpha, V1)	2021-04-15	Europe	Germany	Thuringia		jena	7751	50.9283	11.5853	29807	0
6166ba5b81e18c1c41ced12e	1028300890	IIMK	ncov	Human	B.1.1.7	20I (Alpha, V1)	2021-04-14	Europe	Germany	Thuringia		sondershausen	99706	51.3677	10.8675	29807	0
6166ba5b81e18c1c41ced133	1050205636	IIMK	ncov	Human	B.1.1.7	20I (Alpha, V1)	2021-04-14	Europe	Germany	Thuringia		gera	7548	50.8753	12.0788	29800	0
6166ba5b81e18c1c41ced136	1050206264	IIMK	ncov	Human	B.1.1.7	20I (Alpha, V1)	2021-04-14	Europe	Germany	Thuringia		weida	7570	50.7735	12.0614	29629	1265
6166ba5b81e18c1c41ced13a	1050207263	IIMK	ncov	Human	B.1.1.7	20I (Alpha, V1)	2021-04-15	Europe	Germany	Thuringia		schleiz	7907	50.5774	11.8089	29790	684
6166ba5b81e18c1c41ced145	1091326105	IIMK	ncov	Human	B.1.1.7	20I (Alpha, V1)	2021-04-13	Europe	Germany	Thuringia		arnstadt	99310	50.8343	10.9456	29796	66
6166ba5b81e18c1c41ced14b	1091327112	IIMK	ncov	Human	B.1.1.7	20I (Alpha, V1)	2021-04-14	Europe	Germany	Thuringia		weimar	99423	50.9803	11.3272	29797	26
6166ba5b81e18c1c41ced151	1091327150	IIMK	ncov	Human	B.1.1.7	20I (Alpha, V1)	2021-04-14	Europe	Germany	Thuringia		weimar	99423	50.9803	11.3272	29780	273
6166ba5b81e18c1c41ced152	1091327151	IIMK	ncov	Human	B.1.1.7	20I (Alpha, V1)	2021-04-14	Europe	Germany	Thuringia		weimar	99423	50.9803	11.3272	29797	22
6166ba5b81e18c1c41ced157	1091327299	IIMK	ncov	Human	B.1.1.7	20I (Alpha, V1)	2021-04-14	Europe	Germany	Thuringia		mühlhausen	99974	51.2088	10.459	29799	7
6166ba5b81e18c1c41ced159	1091327316	IIMK	ncov	Human	B.1.1.7	20I (Alpha, V1)	2021-04-14	Europe	Germany	Thuringia		mühlhausen	99974	51.2088	10.459	29798	29
6166ba5b81e18c1c41ced162	1091327442	IIMK	ncov	Human	B.1.1.7	20I (Alpha, V1)	2021-04-14	Europe	Germany	Thuringia		arnstadt	99310	50.8343	10.9456	29799	0
6166ba5b81e18c1c41ced166	1091327682	IIMK	ncov	Human	B.1.1.7	20I (Alpha, V1)	2021-04-14	Europe	Germany	Thuringia		neustadt an der orla	7806	50.7367	11.7444	29799	0
6166ba5b81e18c1c41ced173	1091328720	IIMK	ncov	Human	B.1.1.7	20I (Alpha, V1)	2021-04-16	Europe	Germany	Thuringia		arnstadt	99310	50.8343	10.9456	29774	0
6166ba5b81e18c1c41ced175	1091328722	IIMK	ncov	Human	B.1.1.7	20I (Alpha, V1)	2021-04-16	Europe	Germany	Thuringia		arnstadt	99310	50.8343	10.9456	29774	0
6166ba5b81e18c1c41ced17a	1091328755	IIMK	ncov	Human	B.1.1.7	20I (Alpha, V1)	2021-04-16	Europe	Germany	Thuringia		arnstadt	99310	50.8343	10.9456	29797	18
6166ba5b81e18c1c41ced17f	1091328779	IIMK	ncov	Human	B.1.1.7	20I (Alpha, V1)	2021-04-16	Europe	Germany	Thuringia		arnstadt	99310	50.8343	10.9456	29807	13
6166ba5b81e18c1c41ced180	1091328796	IIMK	ncov	Human	B.1.1.7	20I (Alpha, V1)	2021-04-16	Europe	Germany	Thuringia		arnstadt	99310	50.8343	10.9456	29805	0
6166ba5b81e18c1c41ced189	1091328871	IIMK	ncov	Human	B.1.1.7	20I (Alpha, V1)	2021-04-16	Europe	Germany	Thuringia		arnstadt	99310	50.8343	10.9456	29800	0
6166ba5b81e18c1c41ced18b	1091328896	IIMK	ncov	Human	B.1.1.7	20I (Alpha, V1)	2021-04-16	Europe	Germany	Thuringia		arnstadt	99310	50.8343	10.9456	29802	133
6166ba5b81e18c1c41ced18c	1091328909	IIMK	ncov	Human	B.1.1.7	20I (Alpha, V1)	2021-04-16	Europe	Germany	Thuringia		arnstadt	99310	50.8343	10.9456	29807	0
6166ba5b81e18c1c41ced18f	1091328914	IIMK	ncov	Human	B.1.1.7	20I (Alpha, V1)	2021-04-16	Europe	Germany	Thuringia		arnstadt	99310	50.8343	10.9456	29805	0
6166ba5b81e18c1c41ced192	1000421784	IIMK	ncov	Human	B.1.1.7	20I (Alpha, V1)	2021-04-15	Europe	Germany	Thuringia		erfurt	99084	50.9775	11.0251	29797	54
6166ba5b81e18c1c41ced194	1000421790	IIMK	ncov	Human	B.1.1.7	20I (Alpha, V1)	2021-04-15	Europe	Germany	Thuringia		erfurt	99084	50.9775	11.0251	29804	0
6166ba5b81e18c1c41ced198	1007831179	IIMK	ncov	Human	B.1.1.7	20I (Alpha, V1)	2021-04-15	Europe	Germany	Thuringia		bad köstritz	7586	50.9301	12.0118	29803	0
6166ba5b81e18c1c41ced19d	1024082267	IIMK	ncov	Human	B.1.1.7	20I (Alpha, V1)	2021-04-16	Europe	Germany	Thuringia		sondershausen	99706	51.3677	10.8675	29800	0
6166ba5b81e18c1c41ced0d7	1091328026	IIMK	ncov	Human	B.1.1.7	20I (Alpha, V1)	2021-04-15	Europe	Germany	Thuringia		gebesee	99189	51.1158	10.9314	29801	39
6166ba5b81e18c1c41ced0d2	1050205084	IIMK	ncov	Human	B.1.1.7	20I (Alpha, V1)	2021-04-13	Europe	Germany	Thuringia		gera	7552	50.8753	12.0788	29799	178
6166ba5b81e18c1c41ced0da	1005223432	IIMK	ncov	Human	B.1.1.7	20I (Alpha, V1)	2021-04-13	Europe	Germany	Thuringia		gera	7551	50.8753	12.0788	29807	0
6166ba5b81e18c1c41ced0df	1024083628	IIMK	ncov	Human	B.1.1.7	20I (Alpha, V1)	2021-04-12	Europe	Germany	Thuringia		kyffhäuserland	99707	51.371	11.0077	29799	509
6166ba5b81e18c1c41ced0e1	1024085235	IIMK	ncov	Human	B.1.1.7	20I (Alpha, V1)	2021-04-14	Europe	Germany	Thuringia		sondershausen	99706	51.3677	10.8675	29814	261
6166ba5b81e18c1c41ced0e6	1024550775	IIMK	ncov	Human	B.1.1.7	20I (Alpha, V1)	2021-04-13	Europe	Germany	Thuringia		sömmerda	99610	51.1627	11.1157	29796	1347
6166ba5b81e18c1c41ced0e9	1024550802	IIMK	ncov	Human	B.1.1.7	20I (Alpha, V1)	2021-04-13	Europe	Germany	Thuringia		sömmerda	99610	51.1627	11.1157	29794	904
6166ba5b81e18c1c41ced0eb	1024550806	IIMK	ncov	Human	B.1.1.7	20I (Alpha, V1)	2021-04-14	Europe	Germany	Thuringia		sömmerda	99610	51.1627	11.1157	29807	0
6166ba5b81e18c1c41ced0f4	1024587263	IIMK	ncov	Human	B.1.1.7	20I (Alpha, V1)	2021-04-13	Europe	Germany	Thuringia		worbis	37339	51.4188	10.3625	29797	76
6166ba5b81e18c1c41ced0fb	1024587321	IIMK	ncov	Human	B.1.1.7	20I (Alpha, V1)	2021-04-14	Europe	Germany	Thuringia		am ohmberg	37345	51.5385	10.4226	29798	696
6166ba5b81e18c1c41ced0fd	1024587363	IIMK	ncov	Human	B.1.1.7	20I (Alpha, V1)	2021-04-15	Europe	Germany	Thuringia		worbis	37339	51.4188	10.3625	29796	63
6166ba5b81e18c1c41ced0fe	1024587366	IIMK	ncov	Human	B.1.1.7	20I (Alpha, V1)	2021-04-15	Europe	Germany	Thuringia		worbis	37339	51.4188	10.3625	29807	0
6166ba5b81e18c1c41ced105	1024625923	IIMK	ncov	Human	B.1.1.7	20I (Alpha, V1)	2021-04-14	Europe	Germany	Thuringia		gotha	99867	50.9461	10.6962	29790	267
6166ba5b81e18c1c41ced106	1024625925	IIMK	ncov	Human	B.1.1.7	20I (Alpha, V1)	2021-04-14	Europe	Germany	Thuringia		dreigleichen	99869	50.8916	10.8103	29790	723
6166ba5b81e18c1c41ced109	1024625943	IIMK	ncov	Human	B.1.1.7	20I (Alpha, V1)	2021-04-14	Europe	Germany	Thuringia		tambach-dietharz	99897	50.7925	10.6157	29793	478
6166ba5b81e18c1c41ced10d	1024625969	IIMK	ncov	Human	B.1.1.7	20I (Alpha, V1)	2021-04-14	Europe	Germany	Thuringia		dreigleichen	99869	50.8916	10.8103	29805	0
6166ba5b81e18c1c41ced10e	1024625972	IIMK	ncov	Human	B.1.1.7	20I (Alpha, V1)	2021-04-14	Europe	Germany	Thuringia		gotha	99867	50.9461	10.6962	29799	84
6166ba5b81e18c1c41ced11a	1024628527	IIMK	ncov	Human	B.1.1.7	20I (Alpha, V1)	2021-04-16	Europe	Germany	Thuringia		tambach-dietharz	99897	50.7925	10.6157	29799	77
6166ba5b81e18c1c41ced11b	1024628529	IIMK	ncov	Human	B.1.1.7	20I (Alpha, V1)	2021-04-16	Europe	Germany	Thuringia		dreigleichen	99869	50.8916	10.8103	29792	290
6166ba5b81e18c1c41ced120	1025082774	IIMK	ncov	Human	B.1.1.7	20I (Alpha, V1)	2021-04-14	Europe	Germany	Thuringia		hermsdorf	7629	50.8961	11.8579	29797	711
6166ba5b81e18c1c41ced122	1025082783	IIMK	ncov	Human	B.1.1.7	20I (Alpha, V1)	2021-04-14	Europe	Germany	Thuringia		neuengönna	7778	50.9877	11.6483	29629	836
6166ba5b81e18c1c41ced123	1025082784	IIMK	ncov	Human	B.1.1.7	20I (Alpha, V1)	2021-04-14	Europe	Germany	Thuringia		neuengönna	7778	50.9877	11.6483	29796	98
6166ba5b81e18c1c41ced124	1025082785	IIMK	ncov	Human	B.1.1.7	20I (Alpha, V1)	2021-04-14	Europe	Germany	Thuringia		neuengönna	7778	50.9877	11.6483	29790	414
6166ba5b81e18c1c41ced125	1025082790	IIMK	ncov	Human	B.1.1.7	20I (Alpha, V1)	2021-04-14	Europe	Germany	Thuringia		eisenberg	7607	50.9689	11.8964	29792	1033
6166ba5b81e18c1c41ced130	1050203764	IIMK	ncov	Human	B.1.1.7	20I (Alpha, V1)	2021-04-13	Europe	Germany	Thuringia		gera	7546	50.8753	12.0788	29773	562
6166ba5b81e18c1c41ced131	1050205009	IIMK	ncov	Human	B.1.1.7	20I (Alpha, V1)	2021-04-13	Europe	Germany	Thuringia		crossen	7613	50.9646	11.984	29794	726
6166ba5b81e18c1c41ced132	1050205318	IIMK	ncov	Human	B.1.1.7	20I (Alpha, V1)	2021-04-14	Europe	Germany	Thuringia		gera	7546	50.8753	12.0788	29800	0
6166ba5b81e18c1c41ced138	1050206630	IIMK	ncov	Human	B.1.1.7	20I (Alpha, V1)	2021-04-15	Europe	Germany	Thuringia		hohenleuben	7958	50.7098	12.052	29798	8
6166ba5b81e18c1c41ced13b	1050207451	IIMK	ncov	Human	B.1.1.7	20I (Alpha, V1)	2021-04-15	Europe	Germany	Thuringia		gera	7549	50.8753	12.0788	29799	0
6166ba5b81e18c1c41ced13c	1091324473	IIMK	ncov	Human	B.1.1.7	20I (Alpha, V1)	2021-04-12	Europe	Germany	Thuringia		weimar	99423	50.9803	11.3272	29797	160
6166ba5b81e18c1c41ced13e	1091325793	IIMK	ncov	Human	B.1.1.7	20I (Alpha, V1)	2021-04-13	Europe	Germany	Thuringia		weimar	99423	50.9803	11.3272	29797	537
6166ba5b81e18c1c41ced13f	1091325844	IIMK	ncov	Human	B.1.1.7	20I (Alpha, V1)	2021-04-13	Europe	Germany	Thuringia		weimar	99423	50.9803	11.3272	29791	1074
6166ba5b81e18c1c41ced143	1091326081	IIMK	ncov	Human	B.1.1.7	20I (Alpha, V1)	2021-04-13	Europe	Germany	Thuringia		arnstadt	99310	50.8343	10.9456	29790	597
6166ba5b81e18c1c41ced144	1091326096	IIMK	ncov	Human	B.1.1.7	20I (Alpha, V1)	2021-04-13	Europe	Germany	Thuringia		arnstadt	99310	50.8343	10.9456	29801	0
6166ba5b81e18c1c41ced146	1091326110	IIMK	ncov	Human	B.1.1.7	20I (Alpha, V1)	2021-04-13	Europe	Germany	Thuringia		arnstadt	99310	50.8343	10.9456	29801	0
6166ba5b81e18c1c41ced147	1091326126	IIMK	ncov	Human	B.1.1.7	20I (Alpha, V1)	2021-04-13	Europe	Germany	Thuringia		arnstadt	99310	50.8343	10.9456	29799	0
6166ba5b81e18c1c41ced149	1091326223	IIMK	ncov	Human	B.1.1.7	20I (Alpha, V1)	2021-04-14	Europe	Germany	Thuringia		arnstadt	99310	50.8343	10.9456	29787	1098
6166ba5b81e18c1c41ced14d	1091327119	IIMK	ncov	Human	B.1.1.7	20I (Alpha, V1)	2021-04-14	Europe	Germany	Thuringia		weimar	99423	50.9803	11.3272	29799	253
6166ba5b81e18c1c41ced14e	1091327131	IIMK	ncov	Human	B.1.1.7	20I (Alpha, V1)	2021-04-14	Europe	Germany	Thuringia		weimar	99423	50.9803	11.3272	29807	0
6166ba5b81e18c1c41ced150	1091327136	IIMK	ncov	Human	B.1.1.7	20I (Alpha, V1)	2021-04-14	Europe	Germany	Thuringia		weimar	99423	50.9803	11.3272	29804	0
6166ba5b81e18c1c41ced154	1091327275	IIMK	ncov	Human	B.1.1.7	20I (Alpha, V1)	2021-04-14	Europe	Germany	Thuringia		arnstadt	99310	50.8343	10.9456	29779	787
6166ba5b81e18c1c41ced155	1091327296	IIMK	ncov	Human	B.1.1.7	20I (Alpha, V1)	2021-04-14	Europe	Germany	Thuringia		niederorschel	37355	51.3722	10.4237	29797	0
6166ba5b81e18c1c41ced15b	1091327320	IIMK	ncov	Human	B.1.1.7	20I (Alpha, V1)	2021-04-14	Europe	Germany	Thuringia		bad tennstedt	99955	51.1537	10.8384	29807	0
6166ba5b81e18c1c41ced15f	1091327384	IIMK	ncov	Human	B.1.1.7	20I (Alpha, V1)	2021-04-15	Europe	Germany	Thuringia		arnstadt	99310	50.8343	10.9456	29797	189
6166ba5b81e18c1c41ced160	1091327432	IIMK	ncov	Human	B.1.1.7	20I (Alpha, V1)	2021-04-14	Europe	Germany	Thuringia		arnstadt	99310	50.8343	10.9456	29807	0
6166ba5b81e18c1c41ced165	1091327681	IIMK	ncov	Human	B.1.1.7	20I (Alpha, V1)	2021-04-14	Europe	Germany	Thuringia		jena	7747	50.9283	11.5853	29798	0
6166ba5b81e18c1c41ced167	1091328497	IIMK	ncov	Human	B.1.1.7	20I (Alpha, V1)	2021-04-15	Europe	Germany	Thuringia		weimar	99423	50.9803	11.3272	29798	0
6166ba5b81e18c1c41ced16b	1091328616	IIMK	ncov	Human	B.1.1.7	20I (Alpha, V1)	2021-04-15	Europe	Germany	Thuringia		mühlhausen	99974	51.2088	10.459	29798	33
6166ba5b81e18c1c41ced16d	1091328629	IIMK	ncov	Human	B.1.1.7	20I (Alpha, V1)	2021-04-15	Europe	Germany	Thuringia		weimar	99423	50.9803	11.3272	29807	0
6166ba5b81e18c1c41ced171	1091328708	IIMK	ncov	Human	B.1.1.7	20I (Alpha, V1)	2021-04-16	Europe	Germany	Thuringia		arnstadt	99310	50.8343	10.9456	29817	0
6166ba5b81e18c1c41ced174	1091328721	IIMK	ncov	Human	B.1.1.7	20I (Alpha, V1)	2021-04-16	Europe	Germany	Thuringia		arnstadt	99310	50.8343	10.9456	29797	17
6166ba5b81e18c1c41ced176	1091328736	IIMK	ncov	Human	B.1.1.7	20I (Alpha, V1)	2021-04-16	Europe	Germany	Thuringia		arnstadt	99310	50.8343	10.9456	29807	0
6166ba5b81e18c1c41ced178	1091328741	IIMK	ncov	Human	B.1.1.7	20I (Alpha, V1)	2021-04-16	Europe	Germany	Thuringia		arnstadt	99310	50.8343	10.9456	29805	0
6166ba5b81e18c1c41ced181	1091328797	IIMK	ncov	Human	B.1.1.7	20I (Alpha, V1)	2021-04-16	Europe	Germany	Thuringia		arnstadt	99310	50.8343	10.9456	29796	332
6166ba5b81e18c1c41ced184	1091328833	IIMK	ncov	Human	B.1.1.7	20I (Alpha, V1)	2021-04-16	Europe	Germany	Thuringia		arnstadt	99310	50.8343	10.9456	29809	0
6166ba5b81e18c1c41ced185	1091328840	IIMK	ncov	Human	B.1.1.7	20I (Alpha, V1)	2021-04-16	Europe	Germany	Thuringia		arnstadt	99310	50.8343	10.9456	29813	0
6166ba5b81e18c1c41ced18d	1091328911	IIMK	ncov	Human	B.1.1.7	20I (Alpha, V1)	2021-04-16	Europe	Germany	Thuringia		arnstadt	99310	50.8343	10.9456	29805	71
6166ba5b81e18c1c41ced195	1000422963	IIMK	ncov	Human	B.1.1.7	20I (Alpha, V1)	2021-04-15	Europe	Germany	Thuringia		erfurt	99084	50.9775	11.0251	29794	930
6166ba5b81e18c1c41ced19a	1009018627	IIMK	ncov	Human	B.1.1.7	20I (Alpha, V1)	2021-04-15	Europe	Germany	Thuringia		stadtroda	7646	50.86	11.7281	29819	0
6166ba5b81e18c1c41ced19b	1011251052	IIMK	ncov	Human	B.1.1.7	20I (Alpha, V1)	2021-04-15	Europe	Germany	Thuringia		brahmenau	7554	50.9222	12.16	29799	515
6166ba5b81e18c1c41ced19e	1024083424	IIMK	ncov	Human	B.1.1.7	20I (Alpha, V1)	2021-04-16	Europe	Germany	Thuringia		heldrungen	6577	51.2989	11.219	29805	0
6166ba5b81e18c1c41ced19f	1024083426	IIMK	ncov	Human	B.1.1.7	20I (Alpha, V1)	2021-04-16	Europe	Germany	Thuringia		heldrungen	6577	51.2989	11.219	29807	0
6166ba5b81e18c1c41ced1a0	1024083430	IIMK	ncov	Human	B.1.1.7	20I (Alpha, V1)	2021-04-15	Europe	Germany	Thuringia		heldrungen	6577	51.2989	11.219	29796	837
6166ba5b81e18c1c41ced1a3	1024471139	IIMK	ncov	Human	B.1.1.7	20I (Alpha, V1)	2021-04-15	Europe	Germany	Thuringia		bad salzungen	36433	50.8117	10.2327	29803	0
6166ba5b81e18c1c41ced1a4	1024471148	IIMK	ncov	Human	B.1.1.7	20I (Alpha, V1)	2021-04-15	Europe	Germany	Thuringia		meiningen	98617	50.5678	10.4164	29813	0
6166ba5b81e18c1c41ced1a6	1024471151	IIMK	ncov	Human	B.1.1.7	20I (Alpha, V1)	2021-04-15	Europe	Germany	Thuringia		bad salzungen	36433	50.8117	10.2327	29800	0
6166ba5b81e18c1c41ced0db	1009018554	IIMK	ncov	Human	B.1.1.7	20I (Alpha, V1)	2021-04-13	Europe	Germany	Thuringia		stadtroda	7646	50.86	11.7281	29807	0
6166ba5b81e18c1c41ced0dc	1024082260	IIMK	ncov	Human	B.1.1.7	20I (Alpha, V1)	2021-04-14	Europe	Germany	Thuringia		greußen	99718	51.2286	10.9491	29805	0
6166ba5b81e18c1c41ced0de	1024083441	IIMK	ncov	Human	B.1.1.7	20I (Alpha, V1)	2021-04-16	Europe	Germany	Thuringia		heldrungen	6577	51.2989	11.219	29797	184
6166ba5b81e18c1c41ced0e3	1024465009	IIMK	ncov	Human	B.1.1.7	20I (Alpha, V1)	2021-04-14	Europe	Germany	Thuringia		weimar	99423	50.9803	11.3272	29800	0
6166ba5b81e18c1c41ced0ea	1024550804	IIMK	ncov	Human	B.1.1.7	20I (Alpha, V1)	2021-04-13	Europe	Germany	Thuringia		weißensee	99631	51.1985	11.0665	29794	872
6166ba5b81e18c1c41ced0ee	1024550809	IIMK	ncov	Human	B.1.1.7	20I (Alpha, V1)	2021-04-14	Europe	Germany	Thuringia		weißensee	99631	51.1985	11.0665	29814	4
6166ba5b81e18c1c41ced0f0	1024587230	IIMK	ncov	Human	B.1.1.7	20I (Alpha, V1)	2021-04-13	Europe	Germany	Thuringia		worbis	37339	51.4188	10.3625	29796	1240
6166ba5b81e18c1c41ced0f1	1024587254	IIMK	ncov	Human	B.1.1.7	20I (Alpha, V1)	2021-04-13	Europe	Germany	Thuringia		heiligenstadt	37308	51.378	10.1376	29799	17
6166ba5b81e18c1c41ced0f3	1024587259	IIMK	ncov	Human	B.1.1.7	20I (Alpha, V1)	2021-04-13	Europe	Germany	Thuringia		worbis	37339	51.4188	10.3625	29786	1209
6166ba5b81e18c1c41ced0f8	1024587279	IIMK	ncov	Human	B.1.1.7	20I (Alpha, V1)	2021-04-14	Europe	Germany	Thuringia		am ohmberg	37345	51.5385	10.4226	29798	240
6166ba5b81e18c1c41ced107	1024625939	IIMK	ncov	Human	B.1.1.7	20I (Alpha, V1)	2021-04-14	Europe	Germany	Thuringia		waltershausen	99880	50.8998	10.5563	29796	477
6166ba5b81e18c1c41ced108	1024625941	IIMK	ncov	Human	B.1.1.7	20I (Alpha, V1)	2021-04-14	Europe	Germany	Thuringia		ohrdruf	99885	50.8288	10.7341	29780	861
6166ba5b81e18c1c41ced10a	1024625945	IIMK	ncov	Human	B.1.1.7	20I (Alpha, V1)	2021-04-14	Europe	Germany	Thuringia		gotha	99867	50.9461	10.6962	29805	743
6166ba5b81e18c1c41ced10c	1024625968	IIMK	ncov	Human	B.1.1.7	20I (Alpha, V1)	2021-04-14	Europe	Germany	Thuringia		georgenthal/thür.wald	99887	50.8321	10.6627	29797	68
6166ba5b81e18c1c41ced10f	1024625983	IIMK	ncov	Human	B.1.1.7	20I (Alpha, V1)	2021-04-14	Europe	Germany	Thuringia		gotha	99867	50.9461	10.6962	29809	0
6166ba5b81e18c1c41ced114	1024625994	IIMK	ncov	Human	B.1.1.7	20I (Alpha, V1)	2021-04-16	Europe	Germany	Thuringia		dreigleichen	99869	50.8916	10.8103	29815	0
6166ba5b81e18c1c41ced127	1025082806	IIMK	ncov	Human	B.1.1.7	20I (Alpha, V1)	2021-04-14	Europe	Germany	Thuringia		kahla	7768	50.802	11.5882	29805	1131
6166ba5b81e18c1c41ced12f	1028301434	IIMK	ncov	Human	B.1.1.7	20I (Alpha, V1)	2021-04-14	Europe	Germany	Thuringia		sondershausen	99706	51.3677	10.8675	29807	0
6166ba5b81e18c1c41ced134	1050205737	IIMK	ncov	Human	B.1.1.7	20I (Alpha, V1)	2021-04-14	Europe	Germany	Thuringia		gera	7546	50.8753	12.0788	29798	141
6166ba5b81e18c1c41ced135	1050206193	IIMK	ncov	Human	B.1.1.7	20I (Alpha, V1)	2021-04-14	Europe	Germany	Thuringia		brahmenau	7554	50.9222	12.16	29791	939
6166ba5b81e18c1c41ced141	1091326070	IIMK	ncov	Human	B.1.1.7	20I (Alpha, V1)	2021-04-13	Europe	Germany	Thuringia		arnstadt	99310	50.8343	10.9456	29797	564
6166ba5b81e18c1c41ced142	1091326074	IIMK	ncov	Human	B.1.1.7	20I (Alpha, V1)	2021-04-13	Europe	Germany	Thuringia		arnstadt	99310	50.8343	10.9456	29797	195
6166ba5b81e18c1c41ced156	1091327297	IIMK	ncov	Human	B.1.1.7	20I (Alpha, V1)	2021-04-14	Europe	Germany	Thuringia		dingelstädt	37351	51.3156	10.3215	29800	2
6166ba5b81e18c1c41ced158	1091327314	IIMK	ncov	Human	B.1.1.7	20I (Alpha, V1)	2021-04-14	Europe	Germany	Thuringia		mühlhausen	99974	51.2088	10.459	29799	0
6166ba5b81e18c1c41ced15a	1091327318	IIMK	ncov	Human	B.1.1.7	20I (Alpha, V1)	2021-04-14	Europe	Germany	Thuringia		bad tennstedt	99955	51.1537	10.8384	29790	94
6166ba5b81e18c1c41ced15d	1091327343	IIMK	ncov	Human	B.1.1.7	20I (Alpha, V1)	2021-04-14	Europe	Germany	Thuringia		arnstadt	99310	50.8343	10.9456	29797	65
6166ba5b81e18c1c41ced161	1091327441	IIMK	ncov	Human	B.1.1.7	20I (Alpha, V1)	2021-04-14	Europe	Germany	Thuringia		arnstadt	99310	50.8343	10.9456	29799	0
6166ba5b81e18c1c41ced168	1091328576	IIMK	ncov	Human	B.1.1.7	20I (Alpha, V1)	2021-04-15	Europe	Germany	Thuringia		niederorschel	37355	51.3722	10.4237	29797	0
6166ba5b81e18c1c41ced16a	1091328607	IIMK	ncov	Human	B.1.1.7	20I (Alpha, V1)	2021-04-15	Europe	Germany	Thuringia		mühlhausen	99961	51.2088	10.459	29797	184
6166ba5b81e18c1c41ced16c	1091328626	IIMK	ncov	Human	B.1.1.7	20I (Alpha, V1)	2021-04-15	Europe	Germany	Thuringia		weimar	99423	50.9803	11.3272	29791	264
6166ba5b81e18c1c41ced172	1091328715	IIMK	ncov	Human	B.1.1.7	20I (Alpha, V1)	2021-04-16	Europe	Germany	Thuringia		arnstadt	99310	50.8343	10.9456	29782	0
6166ba5b81e18c1c41ced177	1091328738	IIMK	ncov	Human	B.1.1.7	20I (Alpha, V1)	2021-04-16	Europe	Germany	Thuringia		arnstadt	99310	50.8343	10.9456	29800	0
6166ba5b81e18c1c41ced179	1091328752	IIMK	ncov	Human	B.1.1.7	20I (Alpha, V1)	2021-04-16	Europe	Germany	Thuringia		arnstadt	99310	50.8343	10.9456	29805	135
6166ba5b81e18c1c41ced17b	1091328759	IIMK	ncov	Human	B.1.1.7	20I (Alpha, V1)	2021-04-16	Europe	Germany	Thuringia		arnstadt	99310	50.8343	10.9456	29805	202
6166ba5b81e18c1c41ced17c	1091328763	IIMK	ncov	Human	B.1.1.7	20I (Alpha, V1)	2021-04-16	Europe	Germany	Thuringia		arnstadt	99310	50.8343	10.9456	29805	0
6166ba5b81e18c1c41ced182	1091328806	IIMK	ncov	Human	B.1.1.7	20I (Alpha, V1)	2021-04-16	Europe	Germany	Thuringia		arnstadt	99310	50.8343	10.9456	29807	34
6166ba5b81e18c1c41ced197	1007021199	IIMK	ncov	Human	B.1.1.7	20I (Alpha, V1)	2021-04-14	Europe	Germany	Thuringia		gera	7548	50.8753	12.0788	29800	443
6166ba5b81e18c1c41ced199	1007831180	IIMK	ncov	Human	B.1.1.7	20I (Alpha, V1)	2021-04-15	Europe	Germany	Thuringia		bad köstritz	7586	50.9301	12.0118	29799	335
6166ba5b81e18c1c41ced1a2	1024471138	IIMK	ncov	Human	B.1.1.7	20I (Alpha, V1)	2021-04-15	Europe	Germany	Thuringia		bad salzungen	36433	50.8117	10.2327	29811	0
6166ba5b81e18c1c41ced1a7	1024550812	IIMK	ncov	Human	B.1.1.7	20I (Alpha, V1)	2021-04-15	Europe	Germany	Thuringia		buttstädt	99628	51.1218	11.4169	29794	1500
6166ba5b81e18c1c41ced1ab	1024550817	IIMK	ncov	Human	B.1.1.7	20I (Alpha, V1)	2021-04-15	Europe	Germany	Thuringia		sömmerda	99610	51.1627	11.1157	29807	0
6166ba5b81e18c1c41ced1a9	1024550814	IIMK	ncov	Human	B.1.1.7	20I (Alpha, V1)	2021-04-15	Europe	Germany	Thuringia		sömmerda	99610	51.1627	11.1157	29797	290
6166ba5b81e18c1c41ced1b4	1028300935	IIMK	ncov	Human	B.1.1.7	20I (Alpha, V1)	2021-04-16	Europe	Germany	Thuringia		sondershausen	99706	51.3677	10.8675	29797	561
6166ba5b81e18c1c41ced1b5	1028301400	IIMK	ncov	Human	B.1.1.7	20I (Alpha, V1)	2021-04-14	Europe	Germany	Thuringia		sondershausen	99706	51.3677	10.8675	29801	100
6166ba5b81e18c1c41ced1b6	1028301433	IIMK	ncov	Human	B.1.1.7	20I (Alpha, V1)	2021-04-13	Europe	Germany	Thuringia		sondershausen	99706	51.3677	10.8675	29797	415
6166ba5b81e18c1c41ced1c0	1091327448	IIMK	ncov	Human	B.1.1.7	20I (Alpha, V1)	2021-04-14	Europe	Germany	Thuringia		arnstadt	99310	50.8343	10.9456	29796	671
6166ba5b81e18c1c41ced1c3	1091328480	IIMK	ncov	Human	B.1.1.7	20I (Alpha, V1)	2021-04-15	Europe	Germany	Thuringia		weimar	99423	50.9803	11.3272	29799	184
6166ba5b81e18c1c41ced1c6	1091328493	IIMK	ncov	Human	B.1.1.7	20I (Alpha, V1)	2021-04-15	Europe	Germany	Thuringia		weimar	99423	50.9803	11.3272	29797	58
6166ba5b81e18c1c41ced1cf	1091328737	IIMK	ncov	Human	B.1.1.7	20I (Alpha, V1)	2021-04-16	Europe	Germany	Thuringia		arnstadt	99310	50.8343	10.9456	29796	181
6166ba5b81e18c1c41ced1d0	1091328770	IIMK	ncov	Human	B.1.1.7	20I (Alpha, V1)	2021-04-16	Europe	Germany	Thuringia		arnstadt	99310	50.8343	10.9456	29807	0
6166ba5b81e18c1c41ced1d8	1009018630	IIMK	ncov	Human	B.1.1.7	20I (Alpha, V1)	2021-04-16	Europe	Germany	Thuringia		stadtroda	7646	50.86	11.7281	29810	0
6166ba5b81e18c1c41ced1da	1024550823	IIMK	ncov	Human	B.1.1.7	20I (Alpha, V1)	2021-04-16	Europe	Germany	Thuringia		buttstädt	99628	51.1218	11.4169	29815	0
6166ba5b81e18c1c41ced1dc	1024587398	IIMK	ncov	Human	B.1.1.7	20I (Alpha, V1)	2021-04-16	Europe	Germany	Thuringia		heiligenstadt	37308	51.378	10.1376	29811	153
6166ba5b81e18c1c41ced1e3	1024587464	IIMK	ncov	Human	B.1.1.7	20I (Alpha, V1)	2021-04-16	Europe	Germany	Thuringia		leinefelde	37327	51.3887	10.3268	29802	1377
6166ba5b81e18c1c41ced1e7	1024628588	IIMK	ncov	Human	B.1.1.7	20I (Alpha, V1)	2021-04-16	Europe	Germany	Thuringia		gotha	99867	50.9461	10.6962	29808	33
6166ba5b81e18c1c41ced1e8	1024628616	IIMK	ncov	Human	B.1.1.7	20I (Alpha, V1)	2021-04-16	Europe	Germany	Thuringia		tambach-dietharz	99897	50.7925	10.6157	29815	0
6166ba5b81e18c1c41ced1ed	1028300264	IIMK	ncov	Human	B.1.1.7	20I (Alpha, V1)	2021-04-16	Europe	Germany	Thuringia		heldrungen	6577	51.2989	11.219	29810	0
6166ba5b81e18c1c41ced1ee	1028301391	IIMK	ncov	Human	B.1.1.7	20I (Alpha, V1)	2021-04-16	Europe	Germany	Thuringia		ebeleben	99713	51.2847	10.7319	29801	6
6166ba5b81e18c1c41ced1f0	1050208233	IIMK	ncov	Human	B.1.1.7	20I (Alpha, V1)	2021-04-16	Europe	Germany	Thuringia		gera	7548	50.8753	12.0788	29803	326
6166ba5b81e18c1c41ced1f8	1091330090	IIMK	ncov	Human	B.1.1.7	20I (Alpha, V1)	2021-04-16	Europe	Germany	Thuringia		arnstadt	99310	50.8343	10.9456	29813	0
6166ba5b81e18c1c41ced1fa	1091330099	IIMK	ncov	Human	B.1.1.7	20I (Alpha, V1)	2021-04-16	Europe	Germany	Thuringia		arnstadt	99310	50.8343	10.9456	29809	0
6166ba5b81e18c1c41ced202	1091330310	IIMK	ncov	Human	B.1.1.7	20I (Alpha, V1)	2021-04-17	Europe	Germany	Thuringia		arnstadt	99310	50.8343	10.9456	29810	6
6166ba5b81e18c1c41ced209	1091330933	IIMK	ncov	Human	B.1.1.7	20I (Alpha, V1)	2021-04-19	Europe	Germany	Thuringia		gebesee	99189	51.1158	10.9314	29805	50
6166ba5b81e18c1c41ced20a	1091330934	IIMK	ncov	Human	B.1.1.7	20I (Alpha, V1)	2021-04-19	Europe	Germany	Thuringia		weißensee	99631	51.1985	11.0665	29807	0
6166ba5b81e18c1c41ced20c	1091330936	IIMK	ncov	Human	B.1.1.7	20I (Alpha, V1)	2021-04-19	Europe	Germany	Thuringia		straußfurt	99634	51.1622	10.9897	29808	0
6166ba5b81e18c1c41ced215	1024471577	IIMK	ncov	Human	B.1.1.7	20I (Alpha, V1)	2021-04-16	Europe	Germany	Thuringia		bad salzungen	36433	50.8117	10.2327	29804	160
6166ba5b81e18c1c41ced219	1024550825	IIMK	ncov	Human	B.1.1.7	20I (Alpha, V1)	2021-04-16	Europe	Germany	Thuringia		buttstädt	99628	51.1218	11.4169	29813	0
6166ba5b81e18c1c41ced21a	1024550830	IIMK	ncov	Human	B.1.1.7	20I (Alpha, V1)	2021-04-16	Europe	Germany	Thuringia		straußfurt	99634	51.1622	10.9897	29802	27
6166ba5b81e18c1c41ced21b	1024587396	IIMK	ncov	Human	B.1.1.7	20I (Alpha, V1)	2021-04-16	Europe	Germany	Thuringia		heiligenstadt	37308	51.378	10.1376	29780	1037
6166ba5b81e18c1c41ced220	1024628582	IIMK	ncov	Human	B.1.1.7	20I (Alpha, V1)	2021-04-16	Europe	Germany	Thuringia		tambach-dietharz	99897	50.7925	10.6157	29800	334
6166ba5b81e18c1c41ced223	1024628592	IIMK	ncov	Human	B.1.1.7	20I (Alpha, V1)	2021-04-16	Europe	Germany	Thuringia		gotha	99867	50.9461	10.6962	29803	9
6166ba5b81e18c1c41ced226	1024628605	IIMK	ncov	Human	B.1.1.7	20I (Alpha, V1)	2021-04-16	Europe	Germany	Thuringia		dreigleichen	99869	50.8916	10.8103	29799	429
6166ba5b81e18c1c41ced22a	1024628615	IIMK	ncov	Human	B.1.1.7	20I (Alpha, V1)	2021-04-16	Europe	Germany	Thuringia		gotha	99867	50.9461	10.6962	29812	0
6166ba5b81e18c1c41ced22f	1025082883	IIMK	ncov	Human	B.1.1.7	20I (Alpha, V1)	2021-04-16	Europe	Germany	Thuringia		bürgel	7616	50.9422	11.7571	29800	6
6166ba5b81e18c1c41ced230	1025082886	IIMK	ncov	Human	B.1.1.7	20I (Alpha, V1)	2021-04-16	Europe	Germany	Thuringia		jena	7751	50.9283	11.5853	29798	221
6166ba5b81e18c1c41ced23a	1027790073	IIMK	ncov	Human	B.1.1.7	20I (Alpha, V1)	2021-04-17	Europe	Germany	Thuringia		jena	7743	50.9283	11.5853	29813	0
6166ba5b81e18c1c41ced23b	1028313001	IIMK	ncov	Human	B.1.1.7	20I (Alpha, V1)	2021-04-17	Europe	Germany	Thuringia		arnstadt	99310	50.8343	10.9456	29809	0
6166ba5b81e18c1c41ced23d	1028313012	IIMK	ncov	Human	B.1.1.7	20I (Alpha, V1)	2021-04-17	Europe	Germany	Thuringia		arnstadt	99310	50.8343	10.9456	29805	8
6166ba5b81e18c1c41ced241	1028313049	IIMK	ncov	Human	B.1.1.7	20I (Alpha, V1)	2021-04-17	Europe	Germany	Thuringia		arnstadt	99310	50.8343	10.9456	29746	4
6166ba5b81e18c1c41ced242	1028313051	IIMK	ncov	Human	B.1.1.7	20I (Alpha, V1)	2021-04-17	Europe	Germany	Thuringia		arnstadt	99310	50.8343	10.9456	29803	0
6166ba5b81e18c1c41ced247	1028313060	IIMK	ncov	Human	B.1.1.7	20I (Alpha, V1)	2021-04-17	Europe	Germany	Thuringia		arnstadt	99310	50.8343	10.9456	29813	0
6166ba5b81e18c1c41ced251	1028313180	IIMK	ncov	Human	B.1.1.7	20I (Alpha, V1)	2021-04-18	Europe	Germany	Thuringia		arnstadt	99310	50.8343	10.9456	29800	0
6166ba5b81e18c1c41ced255	1028313211	IIMK	ncov	Human	B.1.1.7	20I (Alpha, V1)	2021-04-18	Europe	Germany	Thuringia		arnstadt	99310	50.8343	10.9456	29804	0
6166ba5b81e18c1c41ced257	1028313228	IIMK	ncov	Human	B.1.1.7	20I (Alpha, V1)	2021-04-18	Europe	Germany	Thuringia		arnstadt	99310	50.8343	10.9456	29815	0
6166ba5b81e18c1c41ced258	1028313256	IIMK	ncov	Human	B.1.1.7	20I (Alpha, V1)	2021-04-18	Europe	Germany	Thuringia		arnstadt	99310	50.8343	10.9456	29792	0
6166ba5b81e18c1c41ced25a	1028313272	IIMK	ncov	Human	B.1.1.7	20I (Alpha, V1)	2021-04-18	Europe	Germany	Thuringia		arnstadt	99310	50.8343	10.9456	29812	0
6166ba5b81e18c1c41ced25b	1050208280	IIMK	ncov	Human	B.1.1.7	20I (Alpha, V1)	2021-04-16	Europe	Germany	Thuringia		ronneburg	7580	50.8628	12.1813	29813	0
6166ba5b81e18c1c41ced260	1050208657	IIMK	ncov	Human	B.1.1.7	20I (Alpha, V1)	2021-04-16	Europe	Germany	Thuringia		münchenbernsdorf	7589	50.8208	11.9327	29812	0
6166ba5b81e18c1c41ced268	1091329843	IIMK	ncov	Human	B.1.1.7	20I (Alpha, V1)	2021-04-16	Europe	Germany	Thuringia		weimar	99423	50.9803	11.3272	29800	0
6166ba5b81e18c1c41ced26e	1091330100	IIMK	ncov	Human	B.1.1.7	20I (Alpha, V1)	2021-04-16	Europe	Germany	Thuringia		arnstadt	99310	50.8343	10.9456	29800	516
6166ba5b81e18c1c41ced271	1091330211	IIMK	ncov	Human	B.1.1.7	20I (Alpha, V1)	2021-04-16	Europe	Germany	Thuringia		arnstadt	99310	50.8343	10.9456	29803	0
6166ba5b81e18c1c41ced274	1091330331	IIMK	ncov	Human	B.1.1.7	20I (Alpha, V1)	2021-04-16	Europe	Germany	Thuringia		bad langensalza	99947	51.1089	10.6475	29813	0
6166ba5b81e18c1c41ced276	1091330340	IIMK	ncov	Human	B.1.1.7	20I (Alpha, V1)	2021-04-16	Europe	Germany	Thuringia		mühlhausen	99974	51.2088	10.459	29813	0
6166ba5b81e18c1c41ced27a	1091330722	IIMK	ncov	Human	B.1.1.7	20I (Alpha, V1)	2021-04-17	Europe	Germany	Thuringia		weimar	99423	50.9803	11.3272	29803	20
6166ba5b81e18c1c41ced1ae	1024628522	IIMK	ncov	Human	B.1.1.7	20I (Alpha, V1)	2021-04-16	Europe	Germany	Thuringia		gotha	99867	50.9461	10.6962	29805	71
6166ba5b81e18c1c41ced1af	1024628524	IIMK	ncov	Human	B.1.1.7	20I (Alpha, V1)	2021-04-15	Europe	Germany	Thuringia		dreigleichen	99869	50.8916	10.8103	29797	401
6166ba5b81e18c1c41ced1b3	1024628553	IIMK	ncov	Human	B.1.1.7	20I (Alpha, V1)	2021-04-15	Europe	Germany	Thuringia		gotha	99867	50.9461	10.6962	29813	0
6166ba5b81e18c1c41ced1b7	1028301435	IIMK	ncov	Human	B.1.1.7	20I (Alpha, V1)	2021-04-14	Europe	Germany	Thuringia		sondershausen	99706	51.3677	10.8675	29798	21
6166ba5b81e18c1c41ced1bb	1091327308	IIMK	ncov	Human	B.1.1.7	20I (Alpha, V1)	2021-04-14	Europe	Germany	Thuringia		bad langensalza	99947	51.1089	10.6475	29797	185
6166ba5b81e18c1c41ced1bc	1091327369	IIMK	ncov	Human	B.1.1.7	20I (Alpha, V1)	2021-04-14	Europe	Germany	Thuringia		arnstadt	99310	50.8343	10.9456	29797	152
6166ba5b81e18c1c41ced1bd	1091327400	IIMK	ncov	Human	B.1.1.7	20I (Alpha, V1)	2021-04-15	Europe	Germany	Thuringia		arnstadt	99310	50.8343	10.9456	29796	943
6166ba5b81e18c1c41ced1c2	1091328479	IIMK	ncov	Human	B.1.1.7	20I (Alpha, V1)	2021-04-15	Europe	Germany	Thuringia		weimar	99423	50.9803	11.3272	29797	0
6166ba5b81e18c1c41ced1c7	1091328503	IIMK	ncov	Human	B.1.1.7	20I (Alpha, V1)	2021-04-15	Europe	Germany	Thuringia		weimar	99423	50.9803	11.3272	29808	178
6166ba5b81e18c1c41ced1c9	1091328618	IIMK	ncov	Human	B.1.1.7	20I (Alpha, V1)	2021-04-15	Europe	Germany	Thuringia		mühlhausen	99974	51.2088	10.459	29803	84
6166ba5b81e18c1c41ced1cd	1091328712	IIMK	ncov	Human	B.1.1.7	20I (Alpha, V1)	2021-04-16	Europe	Germany	Thuringia		arnstadt	99310	50.8343	10.9456	29800	83
6166ba5b81e18c1c41ced1d3	1091328788	IIMK	ncov	Human	B.1.1.7	20I (Alpha, V1)	2021-04-16	Europe	Germany	Thuringia		arnstadt	99310	50.8343	10.9456	29805	0
6166ba5b81e18c1c41ced1d5	1091328847	IIMK	ncov	Human	B.1.1.7	20I (Alpha, V1)	2021-04-16	Europe	Germany	Thuringia		arnstadt	99310	50.8343	10.9456	29805	185
6166ba5b81e18c1c41ced1d7	1004352153	IIMK	ncov	Human	B.1.1.7	20I (Alpha, V1)	2021-04-16	Europe	Germany	Thuringia		gera	7549	50.8753	12.0788	29805	17
6166ba5b81e18c1c41ced1d9	1020326257	IIMK	ncov	Human	B.1.1.7	20I (Alpha, V1)	2021-04-16	Europe	Germany	Thuringia		zeulenroda-triebes	7937	50.6489	11.9803	29813	0
6166ba5b81e18c1c41ced1e1	1024587460	IIMK	ncov	Human	B.1.1.7	20I (Alpha, V1)	2021-04-16	Europe	Germany	Thuringia		leinefelde	37327	51.3887	10.3268	29810	0
6166ba5b81e18c1c41ced1e6	1024625995	IIMK	ncov	Human	B.1.1.7	20I (Alpha, V1)	2021-04-16	Europe	Germany	Thuringia		gotha	99867	50.9461	10.6962	29803	914
6166ba5b81e18c1c41ced1ec	1025082871	IIMK	ncov	Human	B.1.1.7	20I (Alpha, V1)	2021-04-15	Europe	Germany	Thuringia		crossen	7613	50.9646	11.984	29788	942
6166ba5b81e18c1c41ced1ef	1050207654	IIMK	ncov	Human	B.1.1.7	20I (Alpha, V1)	2021-04-16	Europe	Germany	Thuringia		bad köstritz	7586	50.9301	12.0118	29813	0
6166ba5b81e18c1c41ced1f3	1091328904	IIMK	ncov	Human	B.1.1.7	20I (Alpha, V1)	2021-04-16	Europe	Germany	Thuringia		arnstadt	99310	50.8343	10.9456	29803	0
6166ba5b81e18c1c41ced1f6	1091329844	IIMK	ncov	Human	B.1.1.7	20I (Alpha, V1)	2021-04-16	Europe	Germany	Thuringia		weimar	99423	50.9803	11.3272	29811	1
6166ba5b81e18c1c41ced1f7	1091329866	IIMK	ncov	Human	B.1.1.7	20I (Alpha, V1)	2021-04-16	Europe	Germany	Thuringia		weimar	99423	50.9803	11.3272	29815	0
6166ba5b81e18c1c41ced1ff	1091330262	IIMK	ncov	Human	B.1.1.7	20I (Alpha, V1)	2021-04-17	Europe	Germany	Thuringia		arnstadt	99310	50.8343	10.9456	29817	0
6166ba5b81e18c1c41ced200	1091330298	IIMK	ncov	Human	B.1.1.7	20I (Alpha, V1)	2021-04-17	Europe	Germany	Thuringia		arnstadt	99310	50.8343	10.9456	29808	3
6166ba5b81e18c1c41ced203	1091330312	IIMK	ncov	Human	B.1.1.7	20I (Alpha, V1)	2021-04-16	Europe	Germany	Thuringia		arnstadt	99310	50.8343	10.9456	29817	0
6166ba5b81e18c1c41ced204	1091330314	IIMK	ncov	Human	B.1.1.7	20I (Alpha, V1)	2021-04-16	Europe	Germany	Thuringia		arnstadt	99310	50.8343	10.9456	29817	178
6166ba5b81e18c1c41ced207	1091330931	IIMK	ncov	Human	B.1.1.7	20I (Alpha, V1)	2021-04-19	Europe	Germany	Thuringia		kranichfeldu	99448	50.8545	11.2006	29807	0
6166ba5b81e18c1c41ced20b	1091330935	IIMK	ncov	Human	B.1.1.7	20I (Alpha, V1)	2021-04-19	Europe	Germany	Thuringia		kindelbrück	99638	51.2617	11.09	29801	24
6166ba5b81e18c1c41ced20f	1091330939	IIMK	ncov	Human	B.1.1.7	20I (Alpha, V1)	2021-04-19	Europe	Germany	Thuringia		straußfurt	99634	51.1622	10.9897	29808	0
6166ba5b81e18c1c41ced21d	1024587418	IIMK	ncov	Human	B.1.1.7	20I (Alpha, V1)	2021-04-16	Europe	Germany	Thuringia		heiligenstadt	37308	51.378	10.1376	29797	599
6166ba5b81e18c1c41ced222	1024628590	IIMK	ncov	Human	B.1.1.7	20I (Alpha, V1)	2021-04-16	Europe	Germany	Thuringia		waltershausen	99880	50.8998	10.5563	29798	381
6166ba5b81e18c1c41ced224	1024628599	IIMK	ncov	Human	B.1.1.7	20I (Alpha, V1)	2021-04-16	Europe	Germany	Thuringia		dreigleichen	99869	50.8916	10.8103	29801	114
6166ba5b81e18c1c41ced227	1024628611	IIMK	ncov	Human	B.1.1.7	20I (Alpha, V1)	2021-04-16	Europe	Germany	Thuringia		tambach-dietharz	99897	50.7925	10.6157	29799	181
6166ba5b81e18c1c41ced22b	1024628617	IIMK	ncov	Human	B.1.1.7	20I (Alpha, V1)	2021-04-16	Europe	Germany	Thuringia		tambach-dietharz	99897	50.7925	10.6157	29803	13
6166ba5b81e18c1c41ced22c	1024628620	IIMK	ncov	Human	B.1.1.7	20I (Alpha, V1)	2021-04-16	Europe	Germany	Thuringia		dreigleichen	99869	50.8916	10.8103	29804	52
6166ba5b81e18c1c41ced234	1025082905	IIMK	ncov	Human	B.1.1.7	20I (Alpha, V1)	2021-04-16	Europe	Germany	Thuringia		kahla	7768	50.802	11.5882	29796	252
6166ba5b81e18c1c41ced239	1025083018	IIMK	ncov	Human	B.1.1.7	20I (Alpha, V1)	2021-04-16	Europe	Germany	Thuringia		eisenberg	7607	50.9689	11.8964	29797	149
6166ba5b81e18c1c41ced23e	1028313013	IIMK	ncov	Human	B.1.1.7	20I (Alpha, V1)	2021-04-17	Europe	Germany	Thuringia		arnstadt	99310	50.8343	10.9456	29806	7
6166ba5b81e18c1c41ced23f	1028313017	IIMK	ncov	Human	B.1.1.7	20I (Alpha, V1)	2021-04-17	Europe	Germany	Thuringia		arnstadt	99310	50.8343	10.9456	29815	0
6166ba5b81e18c1c41ced245	1028313054	IIMK	ncov	Human	B.1.1.7	20I (Alpha, V1)	2021-04-17	Europe	Germany	Thuringia		arnstadt	99310	50.8343	10.9456	29750	1
6166ba5b81e18c1c41ced24a	1028313081	IIMK	ncov	Human	B.1.1.7	20I (Alpha, V1)	2021-04-17	Europe	Germany	Thuringia		arnstadt	99310	50.8343	10.9456	29815	0
6166ba5b81e18c1c41ced24c	1028313086	IIMK	ncov	Human	B.1.1.7	20I (Alpha, V1)	2021-04-17	Europe	Germany	Thuringia		arnstadt	99310	50.8343	10.9456	29813	0
6166ba5b81e18c1c41ced250	1028313174	IIMK	ncov	Human	B.1.1.7	20I (Alpha, V1)	2021-04-18	Europe	Germany	Thuringia		arnstadt	99310	50.8343	10.9456	29810	0
6166ba5b81e18c1c41ced252	1028313181	IIMK	ncov	Human	B.1.1.7	20I (Alpha, V1)	2021-04-18	Europe	Germany	Thuringia		arnstadt	99310	50.8343	10.9456	29807	0
6166ba5b81e18c1c41ced264	1050209142	IIMK	ncov	Human	B.1.1.7	20I (Alpha, V1)	2021-04-17	Europe	Germany	Thuringia		gera	7551	50.8753	12.0788	29803	1135
6166ba5b81e18c1c41ced269	1091330063	IIMK	ncov	Human	B.1.1.7	20I (Alpha, V1)	2021-04-16	Europe	Germany	Thuringia		arnstadt	99310	50.8343	10.9456	29805	411
6166ba5b81e18c1c41ced26c	1091330088	IIMK	ncov	Human	B.1.1.7	20I (Alpha, V1)	2021-04-16	Europe	Germany	Thuringia		arnstadt	99310	50.8343	10.9456	29803	0
6166ba5b81e18c1c41ced26f	1091330160	IIMK	ncov	Human	B.1.1.7	20I (Alpha, V1)	2021-04-17	Europe	Germany	Thuringia		arnstadt	99310	50.8343	10.9456	29798	239
6166ba5b81e18c1c41ced277	1091330373	IIMK	ncov	Human	B.1.1.7	20I (Alpha, V1)	2021-04-16	Europe	Germany	Thuringia		jena	7747	50.9283	11.5853	29813	0
6166ba5b81e18c1c41ced1ad	1024587347	IIMK	ncov	Human	B.1.1.7	20I (Alpha, V1)	2021-04-15	Europe	Germany	Thuringia		heiligenstadt	37308	51.378	10.1376	29800	106
6166ba5b81e18c1c41ced1b0	1024628530	IIMK	ncov	Human	B.1.1.7	20I (Alpha, V1)	2021-04-16	Europe	Germany	Thuringia		dreigleichen	99869	50.8916	10.8103	29625	1373
6166ba5b81e18c1c41ced1b2	1024628551	IIMK	ncov	Human	B.1.1.7	20I (Alpha, V1)	2021-04-16	Europe	Germany	Thuringia		großvargula	99958	51075	10.7333	29797	229
6166ba5b81e18c1c41ced1b9	1091327298	IIMK	ncov	Human	B.1.1.7	20I (Alpha, V1)	2021-04-14	Europe	Germany	Thuringia		mühlhausen	99974	51.2088	10.459	29793	930
6166ba5b81e18c1c41ced1bf	1091327415	IIMK	ncov	Human	B.1.1.7	20I (Alpha, V1)	2021-04-14	Europe	Germany	Thuringia		arnstadt	99310	50.8343	10.9456	29798	318
6166ba5b81e18c1c41ced1ca	1091328619	IIMK	ncov	Human	B.1.1.7	20I (Alpha, V1)	2021-04-15	Europe	Germany	Thuringia		menteroda	99996	51.3076	10.5632	29805	4
6166ba5b81e18c1c41ced1ce	1091328725	IIMK	ncov	Human	B.1.1.7	20I (Alpha, V1)	2021-04-16	Europe	Germany	Thuringia		arnstadt	99310	50.8343	10.9456	29800	736
6166ba5b81e18c1c41ced1d2	1091328775	IIMK	ncov	Human	B.1.1.7	20I (Alpha, V1)	2021-04-16	Europe	Germany	Thuringia		arnstadt	99310	50.8343	10.9456	29813	0
6166ba5b81e18c1c41ced1d4	1091328822	IIMK	ncov	Human	B.1.1.7	20I (Alpha, V1)	2021-04-16	Europe	Germany	Thuringia		arnstadt	99310	50.8343	10.9456	29797	184
6166ba5b81e18c1c41ced1d6	1002047442	IIMK	ncov	Human	B.1.1.7	20I (Alpha, V1)	2021-04-16	Europe	Germany	Thuringia		auma-weidatal	7955	50.6952	11.9065	29813	0
6166ba5b81e18c1c41ced1db	1024550828	IIMK	ncov	Human	B.1.1.7	20I (Alpha, V1)	2021-04-16	Europe	Germany	Thuringia		straußfurt	99634	51.1622	10.9897	29813	0
6166ba5b81e18c1c41ced1dd	1024587432	IIMK	ncov	Human	B.1.1.7	20I (Alpha, V1)	2021-04-16	Europe	Germany	Thuringia		dingelstädt	37351	51.3156	10.3215	29808	0
6166ba5b81e18c1c41ced1de	1024587445	IIMK	ncov	Human	B.1.1.7	20I (Alpha, V1)	2021-04-16	Europe	Germany	Thuringia		worbis	37339	51.4188	10.3625	29805	703
6166ba5b81e18c1c41ced1e0	1024587454	IIMK	ncov	Human	B.1.1.7	20I (Alpha, V1)	2021-04-16	Europe	Germany	Thuringia		am ohmberg	37345	51.5385	10.4226	29805	387
6166ba5b81e18c1c41ced1f1	1091328751	IIMK	ncov	Human	B.1.1.7	20I (Alpha, V1)	2021-04-16	Europe	Germany	Thuringia		arnstadt	99310	50.8343	10.9456	29796	385
6166ba5b81e18c1c41ced1fc	1091330130	IIMK	ncov	Human	B.1.1.7	20I (Alpha, V1)	2021-04-16	Europe	Germany	Thuringia		arnstadt	99310	50.8343	10.9456	29805	856
6166ba5b81e18c1c41ced1fd	1091330164	IIMK	ncov	Human	B.1.1.7	20I (Alpha, V1)	2021-04-16	Europe	Germany	Thuringia		arnstadt	99310	50.8343	10.9456	29808	184
6166ba5b81e18c1c41ced205	1091330371	IIMK	ncov	Human	B.1.1.7	20I (Alpha, V1)	2021-04-16	Europe	Germany	Thuringia		jena	7747	50.9283	11.5853	29804	0
6166ba5b81e18c1c41ced208	1091330932	IIMK	ncov	Human	B.1.1.7	20I (Alpha, V1)	2021-04-19	Europe	Germany	Thuringia		treffurt/ifta	99830	51.1369	10.2336	29797	0
6166ba5b81e18c1c41ced211	1005223453	IIMK	ncov	Human	B.1.1.7	20I (Alpha, V1)	2021-04-16	Europe	Germany	Thuringia		gera	7549	50.8753	12.0788	29716	0
6166ba5b81e18c1c41ced213	1024465008	IIMK	ncov	Human	B.1.1.7	20I (Alpha, V1)	2021-04-16	Europe	Germany	Thuringia		weimar	99427	50.9803	11.3272	29809	0
6166ba5b81e18c1c41ced214	1024471576	IIMK	ncov	Human	B.1.1.7	20I (Alpha, V1)	2021-04-16	Europe	Germany	Thuringia		bad salzungen	36433	50.8117	10.2327	29804	0
6166ba5b81e18c1c41ced21e	1024625993	IIMK	ncov	Human	B.1.1.7	20I (Alpha, V1)	2021-04-15	Europe	Germany	Thuringia		dreigleichen	99869	50.8916	10.8103	29802	0
6166ba5b81e18c1c41ced21f	1024628577	IIMK	ncov	Human	B.1.1.7	20I (Alpha, V1)	2021-04-16	Europe	Germany	Thuringia		friedrichroda	99894	50.8575	10.5651	29794	1448
6166ba5b81e18c1c41ced231	1025082890	IIMK	ncov	Human	B.1.1.7	20I (Alpha, V1)	2021-04-16	Europe	Germany	Thuringia		stadtroda	7646	50.86	11.7281	29810	0
6166ba5b81e18c1c41ced232	1025082891	IIMK	ncov	Human	B.1.1.7	20I (Alpha, V1)	2021-04-16	Europe	Germany	Thuringia		hermsdorf	7629	50.8961	11.8579	29797	197
6166ba5b81e18c1c41ced233	1025082904	IIMK	ncov	Human	B.1.1.7	20I (Alpha, V1)	2021-04-16	Europe	Germany	Thuringia		kahla	7768	50.802	11.5882	29797	612
6166ba5b81e18c1c41ced236	1025082922	IIMK	ncov	Human	B.1.1.7	20I (Alpha, V1)	2021-04-16	Europe	Germany	Thuringia		eisenberg	7607	50.9689	11.8964	29793	563
6166ba5b81e18c1c41ced237	1025082929	IIMK	ncov	Human	B.1.1.7	20I (Alpha, V1)	2021-04-16	Europe	Germany	Thuringia		stadtroda	7646	50.86	11.7281	29801	49
6166ba5b81e18c1c41ced240	1028313041	IIMK	ncov	Human	B.1.1.7	20I (Alpha, V1)	2021-04-17	Europe	Germany	Thuringia		arnstadt	99310	50.8343	10.9456	29803	34
6166ba5b81e18c1c41ced244	1028313053	IIMK	ncov	Human	B.1.1.7	20I (Alpha, V1)	2021-04-17	Europe	Germany	Thuringia		arnstadt	99310	50.8343	10.9456	29797	41
6166ba5b81e18c1c41ced246	1028313057	IIMK	ncov	Human	B.1.1.7	20I (Alpha, V1)	2021-04-17	Europe	Germany	Thuringia		arnstadt	99310	50.8343	10.9456	29799	119
6166ba5b81e18c1c41ced248	1028313079	IIMK	ncov	Human	B.1.1.7	20I (Alpha, V1)	2021-04-17	Europe	Germany	Thuringia		arnstadt	99310	50.8343	10.9456	29815	0
6166ba5b81e18c1c41ced24e	1028313161	IIMK	ncov	Human	B.1.1.7	20I (Alpha, V1)	2021-04-18	Europe	Germany	Thuringia		arnstadt	99310	50.8343	10.9456	29811	0
6166ba5b81e18c1c41ced253	1028313201	IIMK	ncov	Human	B.1.1.7	20I (Alpha, V1)	2021-04-18	Europe	Germany	Thuringia		arnstadt	99310	50.8343	10.9456	29815	0
6166ba5b81e18c1c41ced256	1028313227	IIMK	ncov	Human	B.1.1.7	20I (Alpha, V1)	2021-04-18	Europe	Germany	Thuringia		arnstadt	99310	50.8343	10.9456	29807	0
6166ba5b81e18c1c41ced25d	1050208439	IIMK	ncov	Human	B.1.1.7	20I (Alpha, V1)	2021-04-16	Europe	Germany	Thuringia		gera	7548	50.8753	12.0788	29802	62
6166ba5b81e18c1c41ced265	1050209509	IIMK	ncov	Human	B.1.1.7	20I (Alpha, V1)	2021-04-17	Europe	Germany	Thuringia		gera	7551	50.8753	12.0788	29807	0
6166ba5b81e18c1c41ced270	1091330187	IIMK	ncov	Human	B.1.1.7	20I (Alpha, V1)	2021-04-16	Europe	Germany	Thuringia		arnstadt	99310	50.8343	10.9456	29805	0
6166ba5b81e18c1c41ced272	1091330303	IIMK	ncov	Human	B.1.1.7	20I (Alpha, V1)	2021-04-17	Europe	Germany	Thuringia		arnstadt	99310	50.8343	10.9456	29791	201
6166ba5b81e18c1c41ced273	1091330329	IIMK	ncov	Human	B.1.1.7	20I (Alpha, V1)	2021-04-16	Europe	Germany	Thuringia		bad langensalza	99947	51.1089	10.6475	29813	0
6166ba5b81e18c1c41ced1a8	1024550813	IIMK	ncov	Human	B.1.1.7	20I (Alpha, V1)	2021-04-15	Europe	Germany	Thuringia		erfurt	99084	50.9775	11.0251	29807	30
6166ba5b81e18c1c41ced1ac	1024587326	IIMK	ncov	Human	B.1.1.7	20I (Alpha, V1)	2021-04-15	Europe	Germany	Thuringia		heiligenstadt	37308	51.378	10.1376	29797	437
6166ba5b81e18c1c41ced1b1	1024628540	IIMK	ncov	Human	B.1.1.7	20I (Alpha, V1)	2021-04-15	Europe	Germany	Thuringia		gotha	99867	50.9461	10.6962	29793	282
6166ba5b81e18c1c41ced1b8	1060906858	IIMK	ncov	Human	B.1.1.7	20I (Alpha, V1)	2021-04-15	Europe	Germany	Thuringia		greiz	7973	50.6564	12.1996	29795	523
6166ba5b81e18c1c41ced1ba	1091327300	IIMK	ncov	Human	B.1.1.7	20I (Alpha, V1)	2021-04-14	Europe	Germany	Thuringia		rodeberg	99976	51.2479	10.3519	29794	1282
6166ba5b81e18c1c41ced1be	1091327411	IIMK	ncov	Human	B.1.1.7	20I (Alpha, V1)	2021-04-14	Europe	Germany	Thuringia		arnstadt	99310	50.8343	10.9456	29794	1002
6166ba5b81e18c1c41ced1c1	1091328478	IIMK	ncov	Human	B.1.1.7	20I (Alpha, V1)	2021-04-15	Europe	Germany	Thuringia		weimar	99423	50.9803	11.3272	29799	396
6166ba5b81e18c1c41ced1c4	1091328482	IIMK	ncov	Human	B.1.1.7	20I (Alpha, V1)	2021-04-15	Europe	Germany	Thuringia		weimar	99423	50.9803	11.3272	29794	1147
6166ba5b81e18c1c41ced1c5	1091328491	IIMK	ncov	Human	B.1.1.7	20I (Alpha, V1)	2021-04-15	Europe	Germany	Thuringia		weimar	99423	50.9803	11.3272	29805	0
6166ba5b81e18c1c41ced1c8	1091328609	IIMK	ncov	Human	B.1.1.7	20I (Alpha, V1)	2021-04-15	Europe	Germany	Thuringia		mühlhausen	99961	51.2088	10.459	29775	955
6166ba5b81e18c1c41ced1cb	1091328678	IIMK	ncov	Human	B.1.1.7	20I (Alpha, V1)	2021-04-16	Europe	Germany	Thuringia		arnstadt	99310	50.8343	10.9456	29802	840
6166ba5b81e18c1c41ced1cc	1091328680	IIMK	ncov	Human	B.1.1.7	20I (Alpha, V1)	2021-04-16	Europe	Germany	Thuringia		arnstadt	99310	50.8343	10.9456	29805	17
6166ba5b81e18c1c41ced1d1	1091328771	IIMK	ncov	Human	B.1.1.7	20I (Alpha, V1)	2021-04-16	Europe	Germany	Thuringia		arnstadt	99310	50.8343	10.9456	29797	96
6166ba5b81e18c1c41ced1df	1024587447	IIMK	ncov	Human	B.1.1.7	20I (Alpha, V1)	2021-04-16	Europe	Germany	Thuringia		heiligenstadt	37308	51.378	10.1376	29817	700
6166ba5b81e18c1c41ced1e2	1024587461	IIMK	ncov	Human	B.1.1.7	20I (Alpha, V1)	2021-04-16	Europe	Germany	Thuringia		heiligenstadt	37308	51.378	10.1376	29805	457
6166ba5b81e18c1c41ced1e4	1024587470	IIMK	ncov	Human	B.1.1.7	20I (Alpha, V1)	2021-04-16	Europe	Germany	Thuringia		dingelstädt	37351	51.3156	10.3215	29803	0
6166ba5b81e18c1c41ced1e5	1024625989	IIMK	ncov	Human	B.1.1.7	20I (Alpha, V1)	2021-04-16	Europe	Germany	Thuringia		gotha	99867	50.9461	10.6962	29806	64
6166ba5b81e18c1c41ced1e9	1024628623	IIMK	ncov	Human	B.1.1.7	20I (Alpha, V1)	2021-04-16	Europe	Germany	Thuringia		gotha	99867	50.9461	10.6962	29810	0
6166ba5b81e18c1c41ced1ea	1025082842	IIMK	ncov	Human	B.1.1.7	20I (Alpha, V1)	2021-04-15	Europe	Germany	Thuringia		crossen	7613	50.9646	11.984	29786	435
6166ba5b81e18c1c41ced1eb	1025082854	IIMK	ncov	Human	B.1.1.7	20I (Alpha, V1)	2021-04-15	Europe	Germany	Thuringia		jena	7751	50.9283	11.5853	29797	499
6166ba5b81e18c1c41ced1f2	1091328894	IIMK	ncov	Human	B.1.1.7	20I (Alpha, V1)	2021-04-16	Europe	Germany	Thuringia		arnstadt	99310	50.8343	10.9456	29801	1079
6166ba5b81e18c1c41ced1f4	1091329801	IIMK	ncov	Human	B.1.1.7	20I (Alpha, V1)	2021-04-16	Europe	Germany	Thuringia		weimar	99423	50.9803	11.3272	29813	0
6166ba5b81e18c1c41ced1f5	1091329831	IIMK	ncov	Human	B.1.1.7	20I (Alpha, V1)	2021-04-16	Europe	Germany	Thuringia		weimar	99423	50.9803	11.3272	29812	0
6166ba5b81e18c1c41ced1f9	1091330095	IIMK	ncov	Human	B.1.1.7	20I (Alpha, V1)	2021-04-16	Europe	Germany	Thuringia		arnstadt	99310	50.8343	10.9456	29817	0
6166ba5b81e18c1c41ced1fb	1091330113	IIMK	ncov	Human	B.1.1.7	20I (Alpha, V1)	2021-04-17	Europe	Germany	Thuringia		arnstadt	99310	50.8343	10.9456	29817	0
6166ba5b81e18c1c41ced1fe	1091330197	IIMK	ncov	Human	B.1.1.7	20I (Alpha, V1)	2021-04-16	Europe	Germany	Thuringia		arnstadt	99310	50.8343	10.9456	29807	301
6166ba5b81e18c1c41ced201	1091330309	IIMK	ncov	Human	B.1.1.7	20I (Alpha, V1)	2021-04-17	Europe	Germany	Thuringia		arnstadt	99310	50.8343	10.9456	29812	0
6166ba5b81e18c1c41ced206	1091330372	IIMK	ncov	Human	B.1.1.7	20I (Alpha, V1)	2021-04-16	Europe	Germany	Thuringia		jena	7745	50.9283	11.5853	29815	0
6166ba5b81e18c1c41ced20d	1091330937	IIMK	ncov	Human	B.1.1.7	20I (Alpha, V1)	2021-04-19	Europe	Germany	Thuringia		erfurt	99095	50.9775	11.0251	29807	0
6166ba5b81e18c1c41ced20e	1091330938	IIMK	ncov	Human	B.1.1.7	20I (Alpha, V1)	2021-04-19	Europe	Germany	Thuringia		erfurt	99095	50.9775	11.0251	29798	184
6166ba5b81e18c1c41ced210	1005223452	IIMK	ncov	Human	B.1.1.7	20I (Alpha, V1)	2021-04-16	Europe	Germany	Thuringia		gera	7549	50.8753	12.0788	29721	10
6166ba5b81e18c1c41ced212	1007021202	IIMK	ncov	Human	B.1.1.7	20I (Alpha, V1)	2021-04-16	Europe	Germany	Thuringia		gera	7548	50.8753	12.0788	29804	79
6166ba5b81e18c1c41ced216	1024550821	IIMK	ncov	Human	B.1.1.7	20I (Alpha, V1)	2021-04-16	Europe	Germany	Thuringia		sömmerda	99610	51.1627	11.1157	29802	166
6166ba5b81e18c1c41ced218	1024550824	IIMK	ncov	Human	B.1.1.7	20I (Alpha, V1)	2021-04-16	Europe	Germany	Thuringia		sömmerda	99610	51.1627	11.1157	29630	442
6166ba5b81e18c1c41ced21c	1024587409	IIMK	ncov	Human	B.1.1.7	20I (Alpha, V1)	2021-04-16	Europe	Germany	Thuringia		dingelstädt	37351	51.3156	10.3215	29797	412
6166ba5b81e18c1c41ced221	1024628587	IIMK	ncov	Human	B.1.1.7	20I (Alpha, V1)	2021-04-16	Europe	Germany	Thuringia		friedrichroda	99894	50.8575	10.5651	29803	176
6166ba5b81e18c1c41ced225	1024628603	IIMK	ncov	Human	B.1.1.7	20I (Alpha, V1)	2021-04-16	Europe	Germany	Thuringia		gotha	99867	50.9461	10.6962	29813	0
6166ba5b81e18c1c41ced228	1024628612	IIMK	ncov	Human	B.1.1.7	20I (Alpha, V1)	2021-04-16	Europe	Germany	Thuringia		tambach-dietharz	99897	50.7925	10.6157	29803	0
6166ba5b81e18c1c41ced229	1024628614	IIMK	ncov	Human	B.1.1.7	20I (Alpha, V1)	2021-04-16	Europe	Germany	Thuringia		ohrdruf	99885	50.8288	10.7341	29801	50
6166ba5b81e18c1c41ced22d	1025082873	IIMK	ncov	Human	B.1.1.7	20I (Alpha, V1)	2021-04-16	Europe	Germany	Thuringia		stadtroda	7646	50.86	11.7281	29801	344
6166ba5b81e18c1c41ced22e	1025082882	IIMK	ncov	Human	B.1.1.7	20I (Alpha, V1)	2021-04-16	Europe	Germany	Thuringia		bürgel	7616	50.9422	11.7571	29803	0
6166ba5b81e18c1c41ced235	1025082907	IIMK	ncov	Human	B.1.1.7	20I (Alpha, V1)	2021-04-16	Europe	Germany	Thuringia		stadtroda	7646	50.86	11.7281	29800	0
6166ba5b81e18c1c41ced238	1025083015	IIMK	ncov	Human	B.1.1.7	20I (Alpha, V1)	2021-04-16	Europe	Germany	Thuringia		eisenberg	7607	50.9689	11.8964	29803	28
6166ba5b81e18c1c41ced23c	1028313008	IIMK	ncov	Human	B.1.1.7	20I (Alpha, V1)	2021-04-17	Europe	Germany	Thuringia		arnstadt	99310	50.8343	10.9456	29804	0
6166ba5b81e18c1c41ced243	1028313052	IIMK	ncov	Human	B.1.1.7	20I (Alpha, V1)	2021-04-17	Europe	Germany	Thuringia		arnstadt	99310	50.8343	10.9456	29808	0
6166ba5b81e18c1c41ced249	1028313080	IIMK	ncov	Human	B.1.1.7	20I (Alpha, V1)	2021-04-17	Europe	Germany	Thuringia		arnstadt	99310	50.8343	10.9456	29799	81
6166ba5b81e18c1c41ced24b	1028313085	IIMK	ncov	Human	B.1.1.7	20I (Alpha, V1)	2021-04-17	Europe	Germany	Thuringia		arnstadt	99310	50.8343	10.9456	29815	0
6166ba5b81e18c1c41ced24d	1028313099	IIMK	ncov	Human	B.1.1.7	20I (Alpha, V1)	2021-04-17	Europe	Germany	Thuringia		arnstadt	99310	50.8343	10.9456	29802	0
6166ba5b81e18c1c41ced24f	1028313173	IIMK	ncov	Human	B.1.1.7	20I (Alpha, V1)	2021-04-18	Europe	Germany	Thuringia		arnstadt	99310	50.8343	10.9456	29806	0
6166ba5b81e18c1c41ced254	1028313208	IIMK	ncov	Human	B.1.1.7	20I (Alpha, V1)	2021-04-18	Europe	Germany	Thuringia		arnstadt	99310	50.8343	10.9456	29815	0
6166ba5b81e18c1c41ced259	1028313268	IIMK	ncov	Human	B.1.1.7	20I (Alpha, V1)	2021-04-18	Europe	Germany	Thuringia		arnstadt	99310	50.8343	10.9456	29805	0
6166ba5b81e18c1c41ced25c	1050208291	IIMK	ncov	Human	B.1.1.7	20I (Alpha, V1)	2021-04-16	Europe	Germany	Thuringia		auma-weidatal	7955	50.6952	11.9065	29811	1
6166ba5b81e18c1c41ced25e	1050208496	IIMK	ncov	Human	B.1.1.7	20I (Alpha, V1)	2021-04-16	Europe	Germany	Thuringia		gera	7545	50.8753	12.0788	29811	55
6166ba5b81e18c1c41ced25f	1050208648	IIMK	ncov	Human	B.1.1.7	20I (Alpha, V1)	2021-04-16	Europe	Germany	Thuringia		gera	7548	50.8753	12.0788	29813	0
6166ba5b81e18c1c41ced261	1050208676	IIMK	ncov	Human	B.1.1.7	20I (Alpha, V1)	2021-04-16	Europe	Germany	Thuringia		gera	7549	50.8753	12.0788	29814	0
6166ba5b81e18c1c41ced262	1050208860	IIMK	ncov	Human	B.1.1.7	20I (Alpha, V1)	2021-04-16	Europe	Germany	Thuringia		weida	7570	50.7735	12.0614	29807	0
6166ba5b81e18c1c41ced263	1050209068	IIMK	ncov	Human	B.1.1.7	20I (Alpha, V1)	2021-04-17	Europe	Germany	Thuringia		gera	7545	50.8753	12.0788	29805	0
6166ba5b81e18c1c41ced266	1050209531	IIMK	ncov	Human	B.1.1.7	20I (Alpha, V1)	2021-04-17	Europe	Germany	Thuringia		gera	7548	50.8753	12.0788	29796	701
6166ba5b81e18c1c41ced267	1091329822	IIMK	ncov	Human	B.1.1.7	20I (Alpha, V1)	2021-04-16	Europe	Germany	Thuringia		weimar	99423	50.9803	11.3272	29790	1036
6166ba5b81e18c1c41ced26a	1091330069	IIMK	ncov	Human	B.1.1.7	20I (Alpha, V1)	2021-04-16	Europe	Germany	Thuringia		arnstadt	99310	50.8343	10.9456	29797	586
6166ba5b81e18c1c41ced26b	1091330072	IIMK	ncov	Human	B.1.1.7	20I (Alpha, V1)	2021-04-16	Europe	Germany	Thuringia		arnstadt	99310	50.8343	10.9456	29800	396
6166ba5b81e18c1c41ced26d	1091330093	IIMK	ncov	Human	B.1.1.7	20I (Alpha, V1)	2021-04-16	Europe	Germany	Thuringia		arnstadt	99310	50.8343	10.9456	29804	0
6166ba5b81e18c1c41ced275	1091330335	IIMK	ncov	Human	B.1.1.7	20I (Alpha, V1)	2021-04-16	Europe	Germany	Thuringia		bad tennstedt	99955	51.1537	10.8384	29815	0
6166ba5b81e18c1c41ced278	1091330665	IIMK	ncov	Human	B.1.1.7	20I (Alpha, V1)	2021-04-17	Europe	Germany	Thuringia		jena	7743	50.9283	11.5853	29813	0
6166ba5b81e18c1c41ced279	1091330666	IIMK	ncov	Human	B.1.1.7	20I (Alpha, V1)	2021-04-17	Europe	Germany	Thuringia		jena	7747	50.9283	11.5853	29813	0
6166ba5b81e18c1c41ced27b	1091330723	IIMK	ncov	Human	B.1.1.7	20I (Alpha, V1)	2021-04-17	Europe	Germany	Thuringia		weimar	99423	50.9803	11.3272	29808	0
6166ba5b81e18c1c41ced27e	1091330753	IIMK	ncov	Human	B.1.1.7	20I (Alpha, V1)	2021-04-17	Europe	Germany	Thuringia		weimar	99423	50.9803	11.3272	29807	0
6166ba5b81e18c1c41ced280	1091330760	IIMK	ncov	Human	B.1.1.7	20I (Alpha, V1)	2021-04-17	Europe	Germany	Thuringia		weimar	99423	50.9803	11.3272	29802	397
6166ba5b81e18c1c41ced28b	1000425548	IIMK	ncov	Human	B.1.1.7	20I (Alpha, V1)	2021-04-19	Europe	Germany	Thuringia		erfurt	99084	50.9775	11.0251	29813	0
6166ba5b81e18c1c41ced28c	1000425565	IIMK	ncov	Human	B.1.1.7	20I (Alpha, V1)	2021-04-19	Europe	Germany	Thuringia		erfurt	99084	50.9775	11.0251	29812	1
6166ba5b81e18c1c41ced28d	1004352178	IIMK	ncov	Human	B.1.1.7	20I (Alpha, V1)	2021-04-19	Europe	Germany	Thuringia		gera	7552	50.8753	12.0788	29812	0
6166ba5b81e18c1c41ced298	1028090095	IIMK	ncov	Human	B.1.1.7	20I (Alpha, V1)	2021-04-19	Europe	Germany	Thuringia		jena	7703	50.9283	11.5853	29815	0
6166ba5b81e18c1c41ced29a	1028313176	IIMK	ncov	Human	B.1.1.7	20I (Alpha, V1)	2021-04-18	Europe	Germany	Thuringia		arnstadt	99310	50.8343	10.9456	29808	0
6166ba5b81e18c1c41ced29b	1028313224	IIMK	ncov	Human	B.1.1.7	20I (Alpha, V1)	2021-04-18	Europe	Germany	Thuringia		arnstadt	99310	50.8343	10.9456	29813	0
6166ba5b81e18c1c41ced29c	1028313257	IIMK	ncov	Human	B.1.1.7	20I (Alpha, V1)	2021-04-18	Europe	Germany	Thuringia		arnstadt	99310	50.8343	10.9456	29789	10
6166ba5b81e18c1c41ced29e	1028313282	IIMK	ncov	Human	B.1.1.7	20I (Alpha, V1)	2021-04-18	Europe	Germany	Thuringia		arnstadt	99310	50.8343	10.9456	29802	45
6166ba5b81e18c1c41ced2a1	1029350510	IIMK	ncov	Human	B.1.1.7	20I (Alpha, V1)	2021-04-19	Europe	Germany	Thuringia		leinefelde	37327	51.3887	10.3268	29810	0
6166ba5b81e18c1c41ced2a3	1029350547	IIMK	ncov	Human	B.1.1.7	20I (Alpha, V1)	2021-04-19	Europe	Germany	Thuringia		worbis	37339	51.4188	10.3625	29812	0
6166ba5b81e18c1c41ced2a6	1050209483	IIMK	ncov	Human	B.1.1.7	20I (Alpha, V1)	2021-04-17	Europe	Germany	Thuringia		bad köstritz	7586	50.9301	12.0118	29802	746
6166ba5b81e18c1c41ced2b0	1050210279	IIMK	ncov	Human	B.1.1.7	20I (Alpha, V1)	2021-04-19	Europe	Germany	Thuringia		gera	7551	50.8753	12.0788	29810	0
6166ba5b81e18c1c41ced2b3	1091328798	IIMK	ncov	Human	B.1.1.7	20I (Alpha, V1)	2021-04-16	Europe	Germany	Thuringia		arnstadt	99310	50.8343	10.9456	29629	695
6166ba5b81e18c1c41ced2b8	1091330960	IIMK	ncov	Human	B.1.1.7	20I (Alpha, V1)	2021-04-18	Europe	Germany	Thuringia		arnstadt	99310	50.8343	10.9456	29807	48
6166ba5b81e18c1c41ced2ba	1091331141	IIMK	ncov	Human	B.1.1.7	20I (Alpha, V1)	2021-04-19	Europe	Germany	Thuringia		jena	7749	50.9283	11.5853	29806	0
6166ba5b81e18c1c41ced2bd	1091331848	IIMK	ncov	Human	B.1.1.7	20I (Alpha, V1)	2021-04-20	Europe	Germany	Thuringia		weimar	99423	50.9803	11.3272	29804	0
6166ba5b81e18c1c41ced2c3	1091332259	IIMK	ncov	Human	B.1.1.7	20I (Alpha, V1)	2021-04-21	Europe	Germany	Thuringia		gerstungen	99834	50.9638	10.0645	29812	0
6166ba5b81e18c1c41ced2cb	1002047444	IIMK	ncov	Human	B.1.1.7	20I (Alpha, V1)	2021-04-19	Europe	Germany	Thuringia		zeulenroda-triebes	7937	50.6489	11.9803	29800	10
6166ba5b81e18c1c41ced2cc	1009010021	IIMK	ncov	Human	B.1.1.7	20I (Alpha, V1)	2021-04-19	Europe	Germany	Thuringia		stadtroda	7646	50.86	11.7281	29795	602
6166ba5b81e18c1c41ced2ce	1011251076	IIMK	ncov	Human	B.1.1.7	20I (Alpha, V1)	2021-04-20	Europe	Germany	Thuringia		gera	7545	50.8753	12.0788	29779	146
6166ba5b81e18c1c41ced2d0	1024083641	IIMK	ncov	Human	B.1.1.7	20I (Alpha, V1)	2021-04-20	Europe	Germany	Thuringia		artern/unstrut	6556	51.3626	11.2951	29786	259
6166ba5b81e18c1c41ced2da	1024471209	IIMK	ncov	Human	B.1.1.7	20I (Alpha, V1)	2021-04-20	Europe	Germany	Thuringia		bad salzungen	36433	50.8117	10.2327	29811	0
6166ba5b81e18c1c41ced2e1	1024550841	IIMK	ncov	Human	B.1.1.7	20I (Alpha, V1)	2021-04-19	Europe	Germany	Thuringia		sömmerda	99610	51.1627	11.1157	29804	77
6166ba5b81e18c1c41ced2ec	1024627517	IIMK	ncov	Human	B.1.1.7	20I (Alpha, V1)	2021-04-20	Europe	Germany	Thuringia		gotha	99867	50.9461	10.6962	29791	589
6166ba5b81e18c1c41ced2ed	1024627519	IIMK	ncov	Human	B.1.1.7	20I (Alpha, V1)	2021-04-20	Europe	Germany	Thuringia		gotha	99867	50.9461	10.6962	29798	223
6166ba5b81e18c1c41ced2ef	1024627526	IIMK	ncov	Human	B.1.1.7	20I (Alpha, V1)	2021-04-20	Europe	Germany	Thuringia		gotha	99867	50.9461	10.6962	29805	0
6166ba5b81e18c1c41ced2f3	1024628632	IIMK	ncov	Human	B.1.1.7	20I (Alpha, V1)	2021-04-20	Europe	Germany	Thuringia		gotha	99867	50.9461	10.6962	29798	452
6166ba5b81e18c1c41ced2f5	1024628636	IIMK	ncov	Human	B.1.1.7	20I (Alpha, V1)	2021-04-20	Europe	Germany	Thuringia		tambach-dietharz	99897	50.7925	10.6157	29803	259
6166ba5b81e18c1c41ced2f7	1024628640	IIMK	ncov	Human	B.1.1.7	20I (Alpha, V1)	2021-04-20	Europe	Germany	Thuringia		gotha	99867	50.9461	10.6962	29806	11
6166ba5b81e18c1c41ced2fa	1024628653	IIMK	ncov	Human	B.1.1.7	20I (Alpha, V1)	2021-04-20	Europe	Germany	Thuringia		dreigleichen	99869	50.8916	10.8103	29804	59
6166ba5b81e18c1c41ced2fb	1024628655	IIMK	ncov	Human	B.1.1.7	20I (Alpha, V1)	2021-04-20	Europe	Germany	Thuringia		waltershausen	99880	50.8998	10.5563	29800	287
6166ba5b81e18c1c41ced2fe	1024628671	IIMK	ncov	Human	B.1.1.7	20I (Alpha, V1)	2021-04-20	Europe	Germany	Thuringia		gotha	99867	50.9461	10.6962	29630	1313
6166ba5b81e18c1c41ced2ff	1024628672	IIMK	ncov	Human	B.1.1.7	20I (Alpha, V1)	2021-04-20	Europe	Germany	Thuringia		großfahner	99100	51.0558	10.8271	29808	0
6166ba5b81e18c1c41ced306	1024628680	IIMK	ncov	Human	B.1.1.7	20I (Alpha, V1)	2021-04-20	Europe	Germany	Thuringia		nesse-apfelstädt	99192	50.921	10.9039	29815	90
6166ba5b81e18c1c41ced307	1024628681	IIMK	ncov	Human	B.1.1.7	20I (Alpha, V1)	2021-04-20	Europe	Germany	Thuringia		gotha	99867	50.9461	10.6962	29796	169
6166ba5b81e18c1c41ced30c	1024628691	IIMK	ncov	Human	B.1.1.7	20I (Alpha, V1)	2021-04-20	Europe	Germany	Thuringia		gotha	99867	50.9461	10.6962	29800	175
6166ba5b81e18c1c41ced311	1027790071	IIMK	ncov	Human	B.1.1.7	20I (Alpha, V1)	2021-04-20	Europe	Germany	Thuringia		jena	7703	50.9283	11.5853	29806	88
6166ba5b81e18c1c41ced312	1027790072	IIMK	ncov	Human	B.1.1.7	20I (Alpha, V1)	2021-04-20	Europe	Germany	Thuringia		eisenberg	7602	50.9689	11.8964	29810	0
6166ba5b81e18c1c41ced31b	1028313379	IIMK	ncov	Human	B.1.1.7	20I (Alpha, V1)	2021-04-19	Europe	Germany	Thuringia		arnstadt	99310	50.8343	10.9456	29812	0
6166ba5b81e18c1c41ced31d	1028313400	IIMK	ncov	Human	B.1.1.7	20I (Alpha, V1)	2021-04-19	Europe	Germany	Thuringia		arnstadt	99310	50.8343	10.9456	29808	0
6166ba5b81e18c1c41ced31e	1028313407	IIMK	ncov	Human	B.1.1.7	20I (Alpha, V1)	2021-04-19	Europe	Germany	Thuringia		arnstadt	99310	50.8343	10.9456	29793	590
6166ba5b81e18c1c41ced328	1029350546	IIMK	ncov	Human	B.1.1.7	20I (Alpha, V1)	2021-04-19	Europe	Germany	Thuringia		worbis	37339	51.4188	10.3625	29798	262
6166ba5b81e18c1c41ced329	1029350553	IIMK	ncov	Human	B.1.1.7	20I (Alpha, V1)	2021-04-19	Europe	Germany	Thuringia		dingelstädt	37351	51.3156	10.3215	29812	0
6166ba5b81e18c1c41ced32c	1050211417	IIMK	ncov	Human	B.1.1.7	20I (Alpha, V1)	2021-04-19	Europe	Germany	Thuringia		gera	7546	50.8753	12.0788	29797	565
6166ba5b81e18c1c41ced330	1050211559	IIMK	ncov	Human	B.1.1.7	20I (Alpha, V1)	2021-04-20	Europe	Germany	Thuringia		weida	7570	50.7735	12.0614	29811	153
6166ba5b81e18c1c41ced332	1050212037	IIMK	ncov	Human	B.1.1.7	20I (Alpha, V1)	2021-04-20	Europe	Germany	Thuringia		tanna	7922	50.4931	11.8611	29795	695
6166ba5b81e18c1c41ced333	1050212103	IIMK	ncov	Human	B.1.1.7	20I (Alpha, V1)	2021-04-20	Europe	Germany	Thuringia		ronneburg	7580	50.8628	12.1813	29806	0
6166ba5b81e18c1c41ced33a	1091331832	IIMK	ncov	Human	B.1.1.7	20I (Alpha, V1)	2021-04-20	Europe	Germany	Thuringia		weimar	99423	50.9803	11.3272	29804	0
6166ba5b81e18c1c41ced33f	1091331899	IIMK	ncov	Human	B.1.1.7	20I (Alpha, V1)	2021-04-20	Europe	Germany	Thuringia		weimar	99423	50.9803	11.3272	29801	174
6166ba5b81e18c1c41ced347	1091331983	IIMK	ncov	Human	B.1.1.7	20I (Alpha, V1)	2021-04-20	Europe	Germany	Thuringia		unstrut-hainich	99991	51.3674	10.4653	29806	226
6166ba5b81e18c1c41ced348	1091331987	IIMK	ncov	Human	B.1.1.7	20I (Alpha, V1)	2021-04-20	Europe	Germany	Thuringia		unstrut-hainich	99991	51.3674	10.4653	29808	0
6166ba5b81e18c1c41ced34d	1000421844	IIMK	ncov	Human	B.1.1.7	20I (Alpha, V1)	2021-04-20	Europe	Germany	Thuringia		erfurt	99084	50.9775	11.0251	29811	0
6166ba5b81e18c1c41ced27c	1091330732	IIMK	ncov	Human	B.1.1.7	20I (Alpha, V1)	2021-04-17	Europe	Germany	Thuringia		weimar	99423	50.9803	11.3272	29796	125
6166ba5b81e18c1c41ced281	1091330761	IIMK	ncov	Human	B.1.1.7	20I (Alpha, V1)	2021-04-17	Europe	Germany	Thuringia		weimar	99423	50.9803	11.3272	29799	0
6166ba5b81e18c1c41ced282	1091330766	IIMK	ncov	Human	B.1.1.7	20I (Alpha, V1)	2021-04-17	Europe	Germany	Thuringia		weimar	99423	50.9803	11.3272	29813	0
6166ba5b81e18c1c41ced285	1091330855	IIMK	ncov	Human	B.1.1.7	20I (Alpha, V1)	2021-04-18	Europe	Germany	Thuringia		jena	7743	50.9283	11.5853	29811	0
6166ba5b81e18c1c41ced287	1091330961	IIMK	ncov	Human	B.1.1.7	20I (Alpha, V1)	2021-04-18	Europe	Germany	Thuringia		arnstadt	99310	50.8343	10.9456	29815	0
6166ba5b81e18c1c41ced288	1000421806	IIMK	ncov	Human	B.1.1.7	20I (Alpha, V1)	2021-04-19	Europe	Germany	Thuringia		erfurt	99084	50.9775	11.0251	29804	0
6166ba5b81e18c1c41ced289	1000421807	IIMK	ncov	Human	B.1.1.7	20I (Alpha, V1)	2021-04-19	Europe	Germany	Thuringia		erfurt	99084	50.9775	11.0251	29812	0
6166ba5b81e18c1c41ced28a	1000421808	IIMK	ncov	Human	B.1.1.7	20I (Alpha, V1)	2021-04-19	Europe	Germany	Thuringia		erfurt	99084	50.9775	11.0251	29808	0
6166ba5b81e18c1c41ced28e	1024471140	IIMK	ncov	Human	B.1.1.7	20I (Alpha, V1)	2021-04-15	Europe	Germany	Thuringia		bad salzungen	36433	50.8117	10.2327	29802	5
6166ba5b81e18c1c41ced293	1027800005	IIMK	ncov	Human	B.1.1.7	20I (Alpha, V1)	2021-04-19	Europe	Germany	Thuringia		eisenberg	7607	50.9689	11.8964	29802	26
6166ba5b81e18c1c41ced294	1027800007	IIMK	ncov	Human	B.1.1.7	20I (Alpha, V1)	2021-04-19	Europe	Germany	Thuringia		schkölen	7619	51.0417	11.8214	29813	0
6166ba5b81e18c1c41ced2a4	1029350552	IIMK	ncov	Human	B.1.1.7	20I (Alpha, V1)	2021-04-19	Europe	Germany	Thuringia		dingelstädt	37351	51.3156	10.3215	29812	0
6166ba5b81e18c1c41ced2a5	1029350567	IIMK	ncov	Human	B.1.1.7	20I (Alpha, V1)	2021-04-19	Europe	Germany	Thuringia		heiligenstadt	37308	51.378	10.1376	29806	0
6166ba5b81e18c1c41ced2ac	1050209896	IIMK	ncov	Human	B.1.1.7	20I (Alpha, V1)	2021-04-18	Europe	Germany	Thuringia		gera	7552	50.8753	12.0788	29801	172
6166ba5b81e18c1c41ced2ad	1050210002	IIMK	ncov	Human	B.1.1.7	20I (Alpha, V1)	2021-04-18	Europe	Germany	Thuringia		ronneburg	7580	50.8628	12.1813	29803	386
6166ba5b81e18c1c41ced2ae	1050210205	IIMK	ncov	Human	B.1.1.7	20I (Alpha, V1)	2021-04-18	Europe	Germany	Thuringia		weida	7570	50.7735	12.0614	29812	0
6166ba5b81e18c1c41ced2b4	1091328800	IIMK	ncov	Human	B.1.1.7	20I (Alpha, V1)	2021-04-16	Europe	Germany	Thuringia		arnstadt	99310	50.8343	10.9456	29810	30
6166ba5b81e18c1c41ced2b5	1091330730	IIMK	ncov	Human	B.1.1.7	20I (Alpha, V1)	2021-04-17	Europe	Germany	Thuringia		weimar	99423	50.9803	11.3272	29801	0
6166ba5b81e18c1c41ced2c1	1091331940	IIMK	ncov	Human	B.1.1.7	20I (Alpha, V1)	2021-04-20	Europe	Germany	Thuringia		weimar	99423	50.9803	11.3272	29805	0
6166ba5b81e18c1c41ced2c9	1000425552	IIMK	ncov	Human	B.1.1.7	20I (Alpha, V1)	2021-04-19	Europe	Germany	Thuringia		erfurt	99084	50.9775	11.0251	29792	573
6166ba5b81e18c1c41ced2ca	1000425572	IIMK	ncov	Human	B.1.1.7	20I (Alpha, V1)	2021-04-19	Europe	Germany	Thuringia		erfurt	99084	50.9775	11.0251	29795	667
6166ba5b81e18c1c41ced2d2	1024084534	IIMK	ncov	Human	B.1.1.7	20I (Alpha, V1)	2021-04-20	Europe	Germany	Thuringia		sondershausen	99706	51.3677	10.8675	29796	644
6166ba5b81e18c1c41ced2d5	1024084548	IIMK	ncov	Human	B.1.1.7	20I (Alpha, V1)	2021-04-20	Europe	Germany	Thuringia		heldrungen	6577	51.2989	11.219	29808	91
6166ba5b81e18c1c41ced2d8	1024085850	IIMK	ncov	Human	B.1.1.7	20I (Alpha, V1)	2021-04-20	Europe	Germany	Thuringia		sondershausen	99706	51.3677	10.8675	29805	40
6166ba5b81e18c1c41ced2d9	1024085852	IIMK	ncov	Human	B.1.1.7	20I (Alpha, V1)	2021-04-20	Europe	Germany	Thuringia		sondershausen	99706	51.3677	10.8675	29801	488
6166ba5b81e18c1c41ced2e5	1024627501	IIMK	ncov	Human	B.1.1.7	20I (Alpha, V1)	2021-04-20	Europe	Germany	Thuringia		gotha	99867	50.9461	10.6962	29778	3
6166ba5b81e18c1c41ced2e7	1024627506	IIMK	ncov	Human	B.1.1.7	20I (Alpha, V1)	2021-04-20	Europe	Germany	Thuringia		gotha	99867	50.9461	10.6962	29805	107
6166ba5b81e18c1c41ced2ee	1024627521	IIMK	ncov	Human	B.1.1.7	20I (Alpha, V1)	2021-04-20	Europe	Germany	Thuringia		gotha	99867	50.9461	10.6962	29796	973
6166ba5b81e18c1c41ced2f0	1024628543	IIMK	ncov	Human	B.1.1.7	20I (Alpha, V1)	2021-04-20	Europe	Germany	Thuringia		friedrichroda	99894	50.8575	10.5651	29802	587
6166ba5b81e18c1c41ced2f2	1024628630	IIMK	ncov	Human	B.1.1.7	20I (Alpha, V1)	2021-04-20	Europe	Germany	Thuringia		gotha	99867	50.9461	10.6962	29805	487
6166ba5b81e18c1c41ced2fc	1024628664	IIMK	ncov	Human	B.1.1.7	20I (Alpha, V1)	2021-04-20	Europe	Germany	Thuringia		waltershausen	99880	50.8998	10.5563	29799	79
6166ba5b81e18c1c41ced301	1024628675	IIMK	ncov	Human	B.1.1.7	20I (Alpha, V1)	2021-04-20	Europe	Germany	Thuringia		dreigleichen	99869	50.8916	10.8103	29799	490
6166ba5b81e18c1c41ced302	1024628676	IIMK	ncov	Human	B.1.1.7	20I (Alpha, V1)	2021-04-20	Europe	Germany	Thuringia		dreigleichen	99869	50.8916	10.8103	29795	433
6166ba5b81e18c1c41ced308	1024628683	IIMK	ncov	Human	B.1.1.7	20I (Alpha, V1)	2021-04-20	Europe	Germany	Thuringia		gotha	99867	50.9461	10.6962	29807	259
6166ba5b81e18c1c41ced309	1024628685	IIMK	ncov	Human	B.1.1.7	20I (Alpha, V1)	2021-04-20	Europe	Germany	Thuringia		gotha	99867	50.9461	10.6962	29809	2
6166ba5b81e18c1c41ced30d	1024628693	IIMK	ncov	Human	B.1.1.7	20I (Alpha, V1)	2021-04-20	Europe	Germany	Thuringia		gotha	99867	50.9461	10.6962	29798	108
6166ba5b81e18c1c41ced30f	1027790057	IIMK	ncov	Human	B.1.1.7	20I (Alpha, V1)	2021-04-20	Europe	Germany	Thuringia		jena	7703	50.9283	11.5853	29810	0
6166ba5b81e18c1c41ced313	1027800006	IIMK	ncov	Human	B.1.1.7	20I (Alpha, V1)	2021-04-19	Europe	Germany	Thuringia		eisenberg	7607	50.9689	11.8964	29801	75
6166ba5b81e18c1c41ced316	1028301005	IIMK	ncov	Human	B.1.1.7	20I (Alpha, V1)	2021-04-20	Europe	Germany	Thuringia		sondershausen	99706	51.3677	10.8675	29808	105
6166ba5b81e18c1c41ced322	1028313469	IIMK	ncov	Human	B.1.1.7	20I (Alpha, V1)	2021-04-19	Europe	Germany	Thuringia		arnstadt	99310	50.8343	10.9456	29810	0
6166ba5b81e18c1c41ced323	1028313475	IIMK	ncov	Human	B.1.1.7	20I (Alpha, V1)	2021-04-19	Europe	Germany	Thuringia		arnstadt	99310	50.8343	10.9456	29798	192
6166ba5b81e18c1c41ced32a	1029350555	IIMK	ncov	Human	B.1.1.7	20I (Alpha, V1)	2021-04-19	Europe	Germany	Thuringia		heiligenstadt	37308	51.378	10.1376	29796	1299
6166ba5b81e18c1c41ced32f	1050211550	IIMK	ncov	Human	B.1.1.7	20I (Alpha, V1)	2021-04-19	Europe	Germany	Thuringia		gera	7548	50.8753	12.0788	29795	461
6166ba5b81e18c1c41ced338	1091331766	IIMK	ncov	Human	B.1.1.7	20I (Alpha, V1)	2021-04-19	Europe	Germany	Thuringia		arnstadt	99310	50.8343	10.9456	29750	0
6166ba5b81e18c1c41ced33d	1091331868	IIMK	ncov	Human	B.1.1.7	20I (Alpha, V1)	2021-04-20	Europe	Germany	Thuringia		weimar	99423	50.9803	11.3272	29796	522
6166ba5b81e18c1c41ced345	1091331981	IIMK	ncov	Human	B.1.1.7	20I (Alpha, V1)	2021-04-20	Europe	Germany	Thuringia		mühlhausen	99974	51.2088	10.459	29802	648
6166ba5b81e18c1c41ced346	1091331982	IIMK	ncov	Human	B.1.1.7	20I (Alpha, V1)	2021-04-20	Europe	Germany	Thuringia		vogtei	99986	51.14	10.3993	29795	955
6166ba5b81e18c1c41ced34f	1000425567	IIMK	ncov	Human	B.1.1.7	20I (Alpha, V1)	2021-04-20	Europe	Germany	Thuringia		erfurt	99084	50.9775	11.0251	29804	0
6166ba5b81e18c1c41ced27f	1091330754	IIMK	ncov	Human	B.1.1.7	20I (Alpha, V1)	2021-04-17	Europe	Germany	Thuringia		weimar	99423	50.9803	11.3272	29800	0
6166ba5b81e18c1c41ced284	1091330854	IIMK	ncov	Human	B.1.1.7	20I (Alpha, V1)	2021-04-18	Europe	Germany	Thuringia		jena	7743	50.9283	11.5853	29803	0
6166ba5b81e18c1c41ced28f	1024471544	IIMK	ncov	Human	B.1.1.7	20I (Alpha, V1)	2021-04-16	Europe	Germany	Thuringia		bad salzungen	36433	50.8117	10.2327	29795	540
6166ba5b81e18c1c41ced291	1024628687	IIMK	ncov	Human	B.1.1.7	20I (Alpha, V1)	2021-04-20	Europe	Germany	Thuringia		waltershausen	99880	50.8998	10.5563	29813	0
6166ba5b81e18c1c41ced292	1025082992	IIMK	ncov	Human	B.1.1.7	20I (Alpha, V1)	2021-04-19	Europe	Germany	Thuringia		stadtroda	7646	50.86	11.7281	29802	0
6166ba5b81e18c1c41ced296	1028090093	IIMK	ncov	Human	B.1.1.7	20I (Alpha, V1)	2021-04-19	Europe	Germany	Thuringia		jena	7703	50.9283	11.5853	29800	21
6166ba5b81e18c1c41ced297	1028090094	IIMK	ncov	Human	B.1.1.7	20I (Alpha, V1)	2021-04-19	Europe	Germany	Thuringia		jena	7703	50.9283	11.5853	29802	194
6166ba5b81e18c1c41ced299	1028090096	IIMK	ncov	Human	B.1.1.7	20I (Alpha, V1)	2021-04-19	Europe	Germany	Thuringia		jena	7703	50.9283	11.5853	29815	0
6166ba5b81e18c1c41ced29d	1028313278	IIMK	ncov	Human	B.1.1.7	20I (Alpha, V1)	2021-04-18	Europe	Germany	Thuringia		arnstadt	99310	50.8343	10.9456	29798	105
6166ba5b81e18c1c41ced2a0	1028313404	IIMK	ncov	Human	B.1.1.7	20I (Alpha, V1)	2021-04-19	Europe	Germany	Thuringia		arnstadt	99310	50.8343	10.9456	29800	56
6166ba5b81e18c1c41ced2a2	1029350518	IIMK	ncov	Human	B.1.1.7	20I (Alpha, V1)	2021-04-19	Europe	Germany	Thuringia		niederorschel	37355	51.3722	10.4237	29639	1040
6166ba5b81e18c1c41ced2a7	1050209637	IIMK	ncov	Human	B.1.1.7	20I (Alpha, V1)	2021-04-18	Europe	Germany	Thuringia		gera	7549	50.8753	12.0788	29794	732
6166ba5b81e18c1c41ced2a8	1050209720	IIMK	ncov	Human	B.1.1.7	20I (Alpha, V1)	2021-04-18	Europe	Germany	Thuringia		weida	7570	50.7735	12.0614	29813	230
6166ba5b81e18c1c41ced2a9	1050209790	IIMK	ncov	Human	B.1.1.7	20I (Alpha, V1)	2021-04-18	Europe	Germany	Thuringia		wurzbach	7343	50.4643	11.5384	29796	497
6166ba5b81e18c1c41ced2b6	1091330731	IIMK	ncov	Human	B.1.1.7	20I (Alpha, V1)	2021-04-17	Europe	Germany	Thuringia		weimar	99423	50.9803	11.3272	29799	184
6166ba5b81e18c1c41ced2bb	1091331356	IIMK	ncov	Human	B.1.1.7	20I (Alpha, V1)	2021-04-20	Europe	Germany	Thuringia		jena	7751	50.9283	11.5853	29809	0
6166ba5b81e18c1c41ced2be	1091331920	IIMK	ncov	Human	B.1.1.7	20I (Alpha, V1)	2021-04-20	Europe	Germany	Thuringia		weimar	99423	50.9803	11.3272	29813	0
6166ba5b81e18c1c41ced2c2	1091332258	IIMK	ncov	Human	B.1.1.7	20I (Alpha, V1)	2021-04-21	Europe	Germany	Thuringia		berka/werra	99837	50.9391	10.0677	29810	0
6166ba5b81e18c1c41ced2c4	1091332260	IIMK	ncov	Human	B.1.1.7	20I (Alpha, V1)	2021-04-21	Europe	Germany	Thuringia		erfurt	99089	50.9775	11.0251	29811	0
6166ba5b81e18c1c41ced2c6	1091332262	IIMK	ncov	Human	B.1.1.7	20I (Alpha, V1)	2021-04-21	Europe	Germany	Thuringia		eisenach	99817	50.9757	10.3201	29811	0
6166ba5b81e18c1c41ced2c8	1000425540	IIMK	ncov	Human	B.1.1.7	20I (Alpha, V1)	2021-04-19	Europe	Germany	Thuringia		erfurt	99084	50.9775	11.0251	29797	643
6166ba5b81e18c1c41ced2cd	1010525294	IIMK	ncov	Human	B.1.1.7	20I (Alpha, V1)	2021-04-19	Europe	Germany	Thuringia		neustadt an der orla	7806	50.7367	11.7444	29808	148
6166ba5b81e18c1c41ced2cf	1024083295	IIMK	ncov	Human	B.1.1.7	20I (Alpha, V1)	2021-04-20	Europe	Germany	Thuringia		heldrungen	6577	51.2989	11.219	29800	0
6166ba5b81e18c1c41ced2d1	1024083643	IIMK	ncov	Human	B.1.1.7	20I (Alpha, V1)	2021-04-20	Europe	Germany	Thuringia		artern/unstrut	6556	51.3626	11.2951	29784	432
6166ba5b81e18c1c41ced2d3	1024084543	IIMK	ncov	Human	B.1.1.7	20I (Alpha, V1)	2021-04-20	Europe	Germany	Thuringia		bad frankenhausen	6567	51.3557	11.0986	29803	39
6166ba5b81e18c1c41ced2d6	1024084551	IIMK	ncov	Human	B.1.1.7	20I (Alpha, V1)	2021-04-20	Europe	Germany	Thuringia		bad frankenhausen	6567	51.3557	11.0986	29808	69
6166ba5b81e18c1c41ced2dc	1024471222	IIMK	ncov	Human	B.1.1.7	20I (Alpha, V1)	2021-04-20	Europe	Germany	Thuringia		bad salzungen	36433	50.8117	10.2327	29804	254
6166ba5b81e18c1c41ced2de	1024550836	IIMK	ncov	Human	B.1.1.7	20I (Alpha, V1)	2021-04-19	Europe	Germany	Thuringia		sömmerda	99610	51.1627	11.1157	29796	998
6166ba5b81e18c1c41ced2df	1024550838	IIMK	ncov	Human	B.1.1.7	20I (Alpha, V1)	2021-04-19	Europe	Germany	Thuringia		sömmerda	99610	51.1627	11.1157	29800	119
6166ba5b81e18c1c41ced2e0	1024550840	IIMK	ncov	Human	B.1.1.7	20I (Alpha, V1)	2021-04-19	Europe	Germany	Thuringia		sömmerda	99610	51.1627	11.1157	29803	61
6166ba5b81e18c1c41ced2e2	1024550842	IIMK	ncov	Human	B.1.1.7	20I (Alpha, V1)	2021-04-19	Europe	Germany	Thuringia		erfurt	99084	50.9775	11.0251	29787	304
6166ba5b81e18c1c41ced2e4	1024587500	IIMK	ncov	Human	B.1.1.7	20I (Alpha, V1)	2021-04-19	Europe	Germany	Thuringia		arenshausen	37318	51.3624	10.0721	29796	747
6166ba5b81e18c1c41ced2e8	1024627507	IIMK	ncov	Human	B.1.1.7	20I (Alpha, V1)	2021-04-20	Europe	Germany	Thuringia		gotha	99867	50.9461	10.6962	29804	460
6166ba5b81e18c1c41ced2f1	1024628566	IIMK	ncov	Human	B.1.1.7	20I (Alpha, V1)	2021-04-20	Europe	Germany	Thuringia		friedrichroda	99894	50.8575	10.5651	29802	467
6166ba5b81e18c1c41ced2f4	1024628635	IIMK	ncov	Human	B.1.1.7	20I (Alpha, V1)	2021-04-20	Europe	Germany	Thuringia		dreigleichen	99869	50.8916	10.8103	29809	191
6166ba5b81e18c1c41ced2f6	1024628637	IIMK	ncov	Human	B.1.1.7	20I (Alpha, V1)	2021-04-20	Europe	Germany	Thuringia		tambach-dietharz	99897	50.7925	10.6157	29798	631
6166ba5b81e18c1c41ced2f9	1024628645	IIMK	ncov	Human	B.1.1.7	20I (Alpha, V1)	2021-04-20	Europe	Germany	Thuringia		gotha	99867	50.9461	10.6962	29630	744
6166ba5b81e18c1c41ced300	1024628674	IIMK	ncov	Human	B.1.1.7	20I (Alpha, V1)	2021-04-20	Europe	Germany	Thuringia		gotha	99867	50.9461	10.6962	29803	166
6166ba5b81e18c1c41ced30a	1024628688	IIMK	ncov	Human	B.1.1.7	20I (Alpha, V1)	2021-04-20	Europe	Germany	Thuringia		waltershausen	99880	50.8998	10.5563	29813	83
6166ba5b81e18c1c41ced30b	1024628689	IIMK	ncov	Human	B.1.1.7	20I (Alpha, V1)	2021-04-20	Europe	Germany	Thuringia		waltershausen	99880	50.8998	10.5563	29799	395
6166ba5b81e18c1c41ced314	1027800008	IIMK	ncov	Human	B.1.1.7	20I (Alpha, V1)	2021-04-19	Europe	Germany	Thuringia		schkölen	7619	51.0417	11.8214	29798	39
6166ba5b81e18c1c41ced315	1028300927	IIMK	ncov	Human	B.1.1.7	20I (Alpha, V1)	2021-04-20	Europe	Germany	Thuringia		sondershausen	99706	51.3677	10.8675	29808	92
6166ba5b81e18c1c41ced31c	1028313395	IIMK	ncov	Human	B.1.1.7	20I (Alpha, V1)	2021-04-19	Europe	Germany	Thuringia		arnstadt	99310	50.8343	10.9456	29808	233
6166ba5b81e18c1c41ced320	1028313414	IIMK	ncov	Human	B.1.1.7	20I (Alpha, V1)	2021-04-19	Europe	Germany	Thuringia		arnstadt	99310	50.8343	10.9456	29789	857
6166ba5b81e18c1c41ced324	1028313607	IIMK	ncov	Human	B.1.1.7	20I (Alpha, V1)	2021-04-21	Europe	Germany	Thuringia		arnstadt	99310	50.8343	10.9456	29812	0
6166ba5b81e18c1c41ced327	1029350534	IIMK	ncov	Human	B.1.1.7	20I (Alpha, V1)	2021-04-19	Europe	Germany	Thuringia		worbis	37339	51.4188	10.3625	29798	454
6166ba5b81e18c1c41ced32b	1029350561	IIMK	ncov	Human	B.1.1.7	20I (Alpha, V1)	2021-04-19	Europe	Germany	Thuringia		leinefelde	37327	51.3887	10.3268	29800	72
6166ba5b81e18c1c41ced32d	1050211483	IIMK	ncov	Human	B.1.1.7	20I (Alpha, V1)	2021-04-19	Europe	Germany	Thuringia		gera	7548	50.8753	12.0788	29801	265
6166ba5b81e18c1c41ced331	1050212016	IIMK	ncov	Human	B.1.1.7	20I (Alpha, V1)	2021-04-20	Europe	Germany	Thuringia		gera	7552	50.8753	12.0788	29810	21
6166ba5b81e18c1c41ced335	1050212410	IIMK	ncov	Human	B.1.1.7	20I (Alpha, V1)	2021-04-20	Europe	Germany	Thuringia		brahmenau	7554	50.9222	12.16	29801	183
6166ba5b81e18c1c41ced336	1050212432	IIMK	ncov	Human	B.1.1.7	20I (Alpha, V1)	2021-04-20	Europe	Germany	Thuringia		gera	7548	50.8753	12.0788	29800	114
6166ba5b81e18c1c41ced339	1091331814	IIMK	ncov	Human	B.1.1.7	20I (Alpha, V1)	2021-04-20	Europe	Germany	Thuringia		weimar	99423	50.9803	11.3272	29804	283
6166ba5b81e18c1c41ced33c	1091331841	IIMK	ncov	Human	B.1.1.7	20I (Alpha, V1)	2021-04-20	Europe	Germany	Thuringia		weimar	99423	50.9803	11.3272	29800	211
6166ba5b81e18c1c41ced33e	1091331880	IIMK	ncov	Human	B.1.1.7	20I (Alpha, V1)	2021-04-20	Europe	Germany	Thuringia		weimar	99423	50.9803	11.3272	29810	259
6166ba5b81e18c1c41ced340	1091331901	IIMK	ncov	Human	B.1.1.7	20I (Alpha, V1)	2021-04-20	Europe	Germany	Thuringia		weimar	99423	50.9803	11.3272	29800	0
6166ba5b81e18c1c41ced341	1091331963	IIMK	ncov	Human	B.1.1.7	20I (Alpha, V1)	2021-04-20	Europe	Germany	Thuringia		jena	7751	50.9283	11.5853	29796	19
6166ba5b81e18c1c41ced342	1091331964	IIMK	ncov	Human	B.1.1.7	20I (Alpha, V1)	2021-04-20	Europe	Germany	Thuringia		jena	7743	50.9283	11.5853	29810	0
6166ba5b81e18c1c41ced344	1091331975	IIMK	ncov	Human	B.1.1.7	20I (Alpha, V1)	2021-04-20	Europe	Germany	Thuringia		mühlhausen	99961	51.2088	10.459	29790	1348
6166ba5b81e18c1c41ced349	1091332664	IIMK	ncov	Human	B.1.1.7	20I (Alpha, V1)	2021-04-20	Europe	Germany	Thuringia		jena	7743	50.9283	11.5853	29812	192
6166ba5b81e18c1c41ced34a	1000421820	IIMK	ncov	Human	B.1.1.7	20I (Alpha, V1)	2021-04-20	Europe	Germany	Thuringia		erfurt	99084	50.9775	11.0251	29776	0
6166ba5b81e18c1c41ced34b	1000421823	IIMK	ncov	Human	B.1.1.7	20I (Alpha, V1)	2021-04-20	Europe	Germany	Thuringia		erfurt	99084	50.9775	11.0251	29809	52
6166ba5b81e18c1c41ced27d	1091330739	IIMK	ncov	Human	B.1.1.7	20I (Alpha, V1)	2021-04-17	Europe	Germany	Thuringia		weimar	99423	50.9803	11.3272	29813	0
6166ba5b81e18c1c41ced283	1091330769	IIMK	ncov	Human	B.1.1.7	20I (Alpha, V1)	2021-04-17	Europe	Germany	Thuringia		weimar	99423	50.9803	11.3272	29800	1
6166ba5b81e18c1c41ced286	1091330856	IIMK	ncov	Human	B.1.1.7	20I (Alpha, V1)	2021-04-18	Europe	Germany	Thuringia		jena	7743	50.9283	11.5853	29797	61
6166ba5b81e18c1c41ced290	1024550827	IIMK	ncov	Human	B.1.1.7	20I (Alpha, V1)	2021-04-16	Europe	Germany	Thuringia		sömmerda	99610	51.1627	11.1157	29801	128
6166ba5b81e18c1c41ced295	1028090092	IIMK	ncov	Human	B.1.1.7	20I (Alpha, V1)	2021-04-19	Europe	Germany	Thuringia		jena	7703	50.9283	11.5853	29806	0
6166ba5b81e18c1c41ced29f	1028313388	IIMK	ncov	Human	B.1.1.7	20I (Alpha, V1)	2021-04-19	Europe	Germany	Thuringia		arnstadt	99310	50.8343	10.9456	29803	0
6166ba5b81e18c1c41ced2aa	1050209837	IIMK	ncov	Human	B.1.1.7	20I (Alpha, V1)	2021-04-18	Europe	Germany	Thuringia		gera	7549	50.8753	12.0788	29726	276
6166ba5b81e18c1c41ced2ab	1050209891	IIMK	ncov	Human	B.1.1.7	20I (Alpha, V1)	2021-04-18	Europe	Germany	Thuringia		gera	7546	50.8753	12.0788	29801	259
6166ba5b81e18c1c41ced2af	1050210219	IIMK	ncov	Human	B.1.1.7	20I (Alpha, V1)	2021-04-19	Europe	Germany	Thuringia		gera	7551	50.8753	12.0788	29806	667
6166ba5b81e18c1c41ced2b1	1050210784	IIMK	ncov	Human	B.1.1.7	20I (Alpha, V1)	2021-04-19	Europe	Germany	Thuringia		bad köstritz	7586	50.9301	12.0118	29805	0
6166ba5b81e18c1c41ced2b2	1050211052	IIMK	ncov	Human	B.1.1.7	20I (Alpha, V1)	2021-04-19	Europe	Germany	Thuringia		gera	7546	50.8753	12.0788	29797	779
6166ba5b81e18c1c41ced2b7	1091330947	IIMK	ncov	Human	B.1.1.7	20I (Alpha, V1)	2021-04-18	Europe	Germany	Thuringia		jena	7743	50.9283	11.5853	29798	296
6166ba5b81e18c1c41ced2b9	1091331075	IIMK	ncov	Human	B.1.1.7	20I (Alpha, V1)	2021-04-19	Europe	Germany	Thuringia		jena	7749	50.9283	11.5853	29801	623
6166ba5b81e18c1c41ced2bc	1091331847	IIMK	ncov	Human	B.1.1.7	20I (Alpha, V1)	2021-04-20	Europe	Germany	Thuringia		weimar	99423	50.9803	11.3272	29800	0
6166ba5b81e18c1c41ced2bf	1091331927	IIMK	ncov	Human	B.1.1.7	20I (Alpha, V1)	2021-04-20	Europe	Germany	Thuringia		weimar	99423	50.9803	11.3272	29812	0
6166ba5b81e18c1c41ced2c5	1091332261	IIMK	ncov	Human	B.1.1.7	20I (Alpha, V1)	2021-04-21	Europe	Germany	Thuringia		erfurt	99084	50.9775	11.0251	29775	0
6166ba5b81e18c1c41ced2c7	1000421805	IIMK	ncov	Human	B.1.1.7	20I (Alpha, V1)	2021-04-19	Europe	Germany	Thuringia		stadtroda	7646	50.86	11.7281	29797	99
6166ba5b81e18c1c41ced2d4	1024084547	IIMK	ncov	Human	B.1.1.7	20I (Alpha, V1)	2021-04-20	Europe	Germany	Thuringia		heldrungen	6577	51.2989	11.219	29810	97
6166ba5b81e18c1c41ced2db	1024471220	IIMK	ncov	Human	B.1.1.7	20I (Alpha, V1)	2021-04-20	Europe	Germany	Thuringia		bad salzungen	36433	50.8117	10.2327	29804	273
6166ba5b81e18c1c41ced2dd	1024550832	IIMK	ncov	Human	B.1.1.7	20I (Alpha, V1)	2021-04-19	Europe	Germany	Thuringia		sömmerda	99610	51.1627	11.1157	29801	0
6166ba5b81e18c1c41ced2e3	1024550843	IIMK	ncov	Human	B.1.1.7	20I (Alpha, V1)	2021-04-19	Europe	Germany	Thuringia		sömmerda	99610	51.1627	11.1157	29801	7
6166ba5b81e18c1c41ced2e6	1024627504	IIMK	ncov	Human	B.1.1.7	20I (Alpha, V1)	2021-04-20	Europe	Germany	Thuringia		gotha	99867	50.9461	10.6962	29800	237
6166ba5b81e18c1c41ced2e9	1024627508	IIMK	ncov	Human	B.1.1.7	20I (Alpha, V1)	2021-04-20	Europe	Germany	Thuringia		gotha	99867	50.9461	10.6962	29801	0
6166ba5b81e18c1c41ced2ea	1024627510	IIMK	ncov	Human	B.1.1.7	20I (Alpha, V1)	2021-04-20	Europe	Germany	Thuringia		gotha	99867	50.9461	10.6962	29812	72
6166ba5b81e18c1c41ced2eb	1024627512	IIMK	ncov	Human	B.1.1.7	20I (Alpha, V1)	2021-04-20	Europe	Germany	Thuringia		gotha	99867	50.9461	10.6962	29804	431
6166ba5b81e18c1c41ced2f8	1024628644	IIMK	ncov	Human	B.1.1.7	20I (Alpha, V1)	2021-04-20	Europe	Germany	Thuringia		nesse-apfelstädt	99192	50.921	10.9039	29797	473
6166ba5b81e18c1c41ced2fd	1024628668	IIMK	ncov	Human	B.1.1.7	20I (Alpha, V1)	2021-04-20	Europe	Germany	Thuringia		gotha	99867	50.9461	10.6962	29810	1
6166ba5b81e18c1c41ced303	1024628677	IIMK	ncov	Human	B.1.1.7	20I (Alpha, V1)	2021-04-20	Europe	Germany	Thuringia		dreigleichen	99869	50.8916	10.8103	29808	109
6166ba5b81e18c1c41ced304	1024628678	IIMK	ncov	Human	B.1.1.7	20I (Alpha, V1)	2021-04-20	Europe	Germany	Thuringia		gotha	99867	50.9461	10.6962	29798	130
6166ba5b81e18c1c41ced305	1024628679	IIMK	ncov	Human	B.1.1.7	20I (Alpha, V1)	2021-04-20	Europe	Germany	Thuringia		waltershausen	99880	50.8998	10.5563	29801	246
6166ba5b81e18c1c41ced30e	1025082959	IIMK	ncov	Human	B.1.1.7	20I (Alpha, V1)	2021-04-19	Europe	Germany	Thuringia		bürgel	7616	50.9422	11.7571	29780	1245
6166ba5b81e18c1c41ced310	1027790069	IIMK	ncov	Human	B.1.1.7	20I (Alpha, V1)	2021-04-20	Europe	Germany	Thuringia		jena	7703	50.9283	11.5853	29813	0
6166ba5b81e18c1c41ced317	1028313297	IIMK	ncov	Human	B.1.1.7	20I (Alpha, V1)	2021-04-19	Europe	Germany	Thuringia		arnstadt	99310	50.8343	10.9456	29808	227
6166ba5b81e18c1c41ced318	1028313332	IIMK	ncov	Human	B.1.1.7	20I (Alpha, V1)	2021-04-19	Europe	Germany	Thuringia		arnstadt	99310	50.8343	10.9456	29805	0
[truncated: 140,624 more rows]
