# Supplementary material for: Leveraging mobility data to analyze persistent SARS-CoV-2 mutations and inform targeted genomic surveillance
Source: eLife. 2025 Jan 15;13:RP94045. doi: 10.7554/eLife.94045 (PMC11735024; doi:10.7554/eLife.94045)
Supplement: Supplementary file 8. [file elife-94045-supp8.xlsx]

## Sheet: supplementary_file_7-metadata_f
strain	Sample_ID	institute	virus	host	Pango_lineage	Nextstrain_clade_original	date	region	country	division	sub_division	location	plz	coordinates.Lat	coordinates.Long	Ambiguous_Bases	Nextstrain_clade	Nextclade_pango	Mutations.S:H49Y	Mutations.S:V90F	Mutations.S:N185D	Mutations.S:N354K	Mutations.S:G496S	Mutations.S:N703D	Mutations.S:T716V	Mutations.S:S939F	Mutations.ORF1b:A520V
IMS-10116-CVDP-1BF1430D-299C-4BB1-A40B-20125E93CBA2		RKI	ncov	Human	B.1.1.7	20I (Alpha, V1)	2021-02-25	Europe	Germany	Baden-Württemberg	Landkreis Heidelberg	Heidelberg	69126	49.3757	8.6911		20I (Alpha, V1)	B.1.1.7	false	false	false	false	false	false	false	false	false
IMS-10117-CVDP-B19FD42A-07DD-4FF3-9610-F1CE0C813B39		RKI	ncov	Human	B.1.1.7	20I (Alpha, V1)	2021-04-13	Europe	Germany	Baden-Württemberg	Landkreis Rhein-Neckar-Kreis	Eppelheim	69214	49.4019	8.6364		20I (Alpha, V1)	Q.7	false	false	false	false	false	false	false	false	false
6166ba5c81e18c1c41ced86e	1024628136	IIMK	ncov	Human	B.1.1.7	20I (Alpha, V1)	2021-03-04	Europe	Germany	Thuringia	Landkreis Gotha	Tambach-Dietharz	99897	50.7925	10.6157	48	20I (Alpha, V1)	B.1.1.7	false	false	false	false	false	false	false	false	false
IMS-10020-CVDP-A7CAE075-3DA8-4CC3-BD97-DE03E2A905D8		RKI	ncov	Human	B.1.1.7	20I (Alpha, V1)	2021-02-09	Europe	Germany	Bayern	Landkreis Weiden i.d.OPf.	Weiden	92637	49.6768	12.1561		20I (Alpha, V1)	B.1.1.7	false	false	false	false	false	false	false	false	false
IMS-10565-CVDP-C8D198FC-B801-47F6-B359-829D8FFF0905		RKI	ncov	Human	B.1.1.7	20I (Alpha, V1)	2021-02-06	Europe	Germany	Hamburg	Landkreis Hamburg; Freie und Hansestadt	Hamburg	20095	53.5722	10.0031		20I (Alpha, V1)	B.1.1.7	false	false	false	false	false	false	false	false	false
IMS-10013-CVDP-FC640B55-F31C-4F6F-ADBE-5A09A6B56D7B		RKI	ncov	Human	B.1.1.7	20I (Alpha, V1)	2021-03-16	Europe	Germany	Sachsen	Landkreis Nordsachsen	Wermsdorf	4779	51.2833	12.95		20I (Alpha, V1)	B.1.1.7	false	false	false	false	false	false	false	false	false
IMS-10375-CVDP-1196279D-9C58-4B23-BA66-C6FE6E76FBD0		RKI	ncov	Human	B.1.1.7	20I (Alpha, V1)	2021-02-05	Europe	Germany	Baden-Württemberg	Landkreis Heidelberg	Heidelberg	69120	49.4169	8.6764		20I (Alpha, V1)	B.1.1.7	false	false	false	false	false	false	false	false	false
IMS-10020-CVDP-7466B304-78AF-4945-86EC-1519B6A20019		RKI	ncov	Human	B.1.1.7	20I (Alpha, V1)	2021-02-16	Europe	Germany	Bayern	Landkreis Weiden i.d.OPf.	Weiden	92637	49.6768	12.1561		20I (Alpha, V1)	B.1.1.7	false	false	false	false	false	false	false	false	false
6166ba5b81e18c1c41cec986	1025083390	IIMK	ncov	Human	B.1.1.7	20I (Alpha, V1)	2021-04-30	Europe	Germany	Thuringia	Landkreis Saale-Holzland-Kreis	Schkölen	7619	51.0417	11.8214	0	20I (Alpha, V1)	B.1.1.7	false	false	false	false	false	false	false	false	false
IMS-10013-CVDP-B651D4F3-5DB5-4A2C-B6CA-0899C545BC0A		RKI	ncov	Human	B.1.1.7	20I (Alpha, V1)	2021-04-07	Europe	Germany	Bayern	Landkreis Augsburg; Stadt	Augsburg	86154	48.3932	10.8814		20I (Alpha, V1)	Q.7	false	false	false	false	false	false	false	false	false
IMS-10261-CVDP-0C924E58-4644-403F-9180-6F4DC0755988		RKI	ncov	Human	B.1.1.7	20I (Alpha, V1)	2021-02-22	Europe	Germany	Nordrhein-Westfalen	Landkreis Lippe	Bad Salzuflen	32105	52.0808	8.7505		20I (Alpha, V1)	B.1.1.7	false	false	false	false	false	false	false	false	false
IMS-10117-CVDP-3F9BE74D-DFC0-4539-A5AE-B7F1BA388797		RKI	ncov	Human	B.1.1.7	20I (Alpha, V1)	2021-03-26	Europe	Germany	Nordrhein-Westfalen	Landkreis Leverkusen; Stadt	Leverkusen	51375	51.0331	7.052		20I (Alpha, V1)	B.1.1.7	false	false	false	false	false	false	false	false	false
IMS-10013-CVDP-804AB907-DAD2-4165-A20D-6800A6F6BC48		RKI	ncov	Human	B.1.1.7	20I (Alpha, V1)	2021-04-16	Europe	Germany	Bayern	Landkreis Augsburg; Stadt	Augsburg	86154	48.3932	10.8814		20I (Alpha, V1)	B.1.1.7	false	false	false	false	false	false	false	false	false
IMS-10013-CVDP-9C8B2712-0B8E-421D-AEFF-B84710735CE1		RKI	ncov	Human	B.1.1.7	20I (Alpha, V1)	2021-03-31	Europe	Germany	Bayern	Landkreis Augsburg; Stadt	Augsburg	86154	48.3932	10.8814		20I (Alpha, V1)	B.1.1.7	false	false	false	false	false	false	false	false	false
IMS-10261-CVDP-FDEF4848-509A-4BC7-A4CB-DADBD81700E2		RKI	ncov	Human	B.1.1.7	20I (Alpha, V1)	2021-04-14	Europe	Germany	Nordrhein-Westfalen	Landkreis Lippe	Bad Salzuflen	32105	52.0808	8.7505		20I (Alpha, V1)	B.1.1.7	false	false	false	false	false	false	false	false	false
IMS-10116-CVDP-FDA13FAE-FEE5-4B5B-8B7B-C43F07801684		RKI	ncov	Human	B.1.1.7	20I (Alpha, V1)	2021-04-12	Europe	Germany	Baden-Württemberg	Landkreis Heidelberg	Heidelberg	69126	49.3757	8.6911		20I (Alpha, V1)	B.1.1.7	false	false	false	false	false	false	false	false	false
IMS-10267-CVDP-27AFD5FF-FAE4-45B4-9916-4AC5A64AE474		RKI	ncov	Human	B.1.1.7	20I (Alpha, V1)	2021-02-27	Europe	Germany	Nordrhein-Westfalen	Landkreis Dortmund; Stadt	Dortmund	44137	51.5097	7.4601		20I (Alpha, V1)	B.1.1.7	false	false	false	false	false	false	false	false	false
IMS-10036-CVDP-F30068C0-BB05-4489-998A-1686819266FE		RKI	ncov	Human	B.1.1.7	20I (Alpha, V1)	2021-03-31	Europe	Germany	Brandenburg	Landkreis Frankfurt (Oder)	Frankfurt (Oder)	15230	52.3475	14.5539		20I (Alpha, V1)	B.1.1.7	false	false	false	false	false	false	false	false	false
IMS-10013-CVDP-60D9A6BB-886D-447F-8AF3-88802FE92756		RKI	ncov	Human	B.1.1.7	20I (Alpha, V1)	2021-03-19	Europe	Germany	Sachsen	Landkreis Nordsachsen	Wermsdorf	4779	51.2833	12.95		20I (Alpha, V1)	B.1.1.7	false	false	false	false	false	false	false	false	false
IMS-10186-CVDP-33A90D88-E201-4020-81FD-3368091D9D92		RKI	ncov	Human	B.1.1.7	20I (Alpha, V1)	2021-02-10	Europe	Germany	Nordrhein-Westfalen	Landkreis Düsseldorf; Stadt	Düsseldorf	40210	51.2216	6.7897		20I (Alpha, V1)	B.1.1.7	false	false	false	false	false	false	false	false	false
IMS-10261-CVDP-D660D821-0FC5-4907-A063-5F16692AB56B		RKI	ncov	Human	B.1.1.7	20I (Alpha, V1)	2021-02-11	Europe	Germany	Nordrhein-Westfalen	Landkreis Lippe	Bad Salzuflen	32105	52.0808	8.7505		20I (Alpha, V1)	B.1.1.7	false	false	false	false	false	false	false	false	false
IMS-10020-CVDP-0C0E2ADA-4524-43C5-9613-B52AE1D9D42F		RKI	ncov	Human	B.1.1.7	20I (Alpha, V1)	2021-04-13	Europe	Germany	Baden-Württemberg	Landkreis Esslingen	Leinfelden-Echterdingen	70771	48.6941	9.1681		20I (Alpha, V1)	B.1.1.7	false	false	false	false	false	false	false	false	false
IMS-10375-CVDP-3C3A4FDC-CC5B-4CF5-AC9B-09DBB3EAE34F		RKI	ncov	Human	B.1.1.7	20I (Alpha, V1)	2021-03-02	Europe	Germany	Baden-Württemberg	Landkreis Heidelberg	Heidelberg	69120	49.4169	8.6764		20I (Alpha, V1)	B.1.1.7	false	false	false	false	false	false	false	false	false
6166ba5b81e18c1c41ced4de	1024550929	IIMK	ncov	Human	B.1.1.7	20I (Alpha, V1)	2021-04-23	Europe	Germany	Thuringia	Landkreis Sömmerda	Kölleda	99625	51.1878	11.2461	4	20I (Alpha, V1)	B.1.1.7	false	false	false	false	false	false	false	false	true
IMS-10122-CVDP-5EC759FF-63A5-4E8A-A181-ADB2A5DACD1E		RKI	ncov	Human	B.1.1.7	20I (Alpha, V1)	2021-03-24	Europe	Germany	Sachsen	Kreisfreie Stadt Leipzig	Leipzig	4289	51.3667	12.3833		20I (Alpha, V1)	B.1.1.7	false	false	false	false	false	false	false	false	false
IMS-10150-CVDP-6B72254F-EEDA-4D13-8FA8-AADE41CE90A7		RKI	ncov	Human	B.1.1.7	20I (Alpha, V1)	2021-05-07	Europe	Germany	Nordrhein-Westfalen	Landkreis Leverkusen; Stadt	Leverkusen	51375	51.0331	7.052		20I (Alpha, V1)	B.1.1.7	false	false	false	false	false	false	false	false	false
IMS-10013-CVDP-CE76C7FD-1541-4DCC-8817-0BDDB5969066		RKI	ncov	Human	B.1.1.7	20I (Alpha, V1)	2021-02-18	Europe	Germany	Bremen	Kreisfreie Stadt Bremen	Bremen	28357	53.1178	8.8947		20I (Alpha, V1)	B.1.1.7	false	false	false	false	false	false	false	false	false
6166ba5b81e18c1c41cecf42	1028301416	IIMK	ncov	Human	B.1.1.7	20I (Alpha, V1)	2021-04-07	Europe	Germany	Thuringia	Landkreis Kyffhäuserkreis	Sondershausen	99706	51.3677	10.8675	595	20I (Alpha, V1)	B.1.1.7	false	false	false	false	false	false	false	false	false
IMS-10116-CVDP-44B0CA96-07E3-4206-B932-F5F838F36B92		RKI	ncov	Human	B.1.1.7	20I (Alpha, V1)	2021-03-25	Europe	Germany	Berlin	Landkreis Berlin; Stadt	Berlin	13407	52.5727	13.3512		20I (Alpha, V1)	B.1.1.7	false	false	false	false	false	false	false	false	false
IMS-10117-CVDP-53D54723-6112-444B-BFA1-F72EA8926209		RKI	ncov	Human	B.1.1.7	20I (Alpha, V1)	2021-03-04	Europe	Germany	Hamburg	Landkreis Hamburg; Freie und Hansestadt	Hamburg	22083	53.5722	10.0031		20I (Alpha, V1)	B.1.1.7	false	false	false	false	false	false	false	false	false
IMS-10375-CVDP-68554F06-6EA9-4CC9-A3F7-B4C33D136AB7		RKI	ncov	Human	B.1.1.7	20I (Alpha, V1)	2021-04-19	Europe	Germany	Baden-Württemberg	Landkreis Heidelberg	Heidelberg	69120	49.4169	8.6764		20I (Alpha, V1)	B.1.1.7	false	false	false	false	false	false	false	false	false
IMS-10122-CVDP-0B180BCD-440F-4E58-98AA-A2371562257F		RKI	ncov	Human	B.1.1.7	20I (Alpha, V1)	2021-03-19	Europe	Germany	Baden-Württemberg	Landkreis Karlsruhe	Karlsruhe	76131	49.0078	8.4199		20I (Alpha, V1)	B.1.1.7	false	false	false	false	false	false	false	false	false
IMS-10023-CVDP-91D9E07E-6E06-4F46-A3B4-3F4811A6D788		RKI	ncov	Human	B.1.1.7	20I (Alpha, V1)	2021-02-25	Europe	Germany	Sachsen	Landkreis Erzgebirgskreis	Neukirchen/Erzgebirge	9221	50.7835	12.87		20I (Alpha, V1)	B.1.1.7	false	false	false	false	false	false	false	false	false
IMS-10203-CVDP-CC341CD1-8BEE-415D-B57A-B7D5624AC6D5		RKI	ncov	Human	B.1.1.7	20I (Alpha, V1)	2021-03-29	Europe	Germany	Hamburg	Landkreis Hamburg; Freie und Hansestadt	Hamburg	20095	53.5722	10.0031		20I (Alpha, V1)	B.1.1.7	false	false	false	false	false	false	false	false	false
IMS-10020-CVDP-F8928FA4-7BA5-4609-B5C9-6CF2C09F4BDD		RKI	ncov	Human	B.1.1.7	20I (Alpha, V1)	2021-04-05	Europe	Germany	Baden-Württemberg	Landkreis Esslingen	Leinfelden-Echterdingen	70771	48.6941	9.1681		20I (Alpha, V1)	B.1.1.7	false	false	false	false	false	false	false	false	false
IMS-10013-CVDP-91255927-9DB4-4B1F-9A27-2B991C0BCD6E		RKI	ncov	Human	B.1.1.7	20I (Alpha, V1)	2021-03-25	Europe	Germany	Bayern	Kreisfreie Stadt München	München	81737	48.1098	11.6183		20I (Alpha, V1)	B.1.1.7	false	false	false	false	false	false	false	false	false
6166ba5b81e18c1c41cecc53	1091313309	IIMK	ncov	Human	B.1.1.7	20I (Alpha, V1)	2021-03-31	Europe	Germany	Thuringia	Landkreis Ilm-Kreis	Arnstadt	99310	50.8343	10.9456	65	20I (Alpha, V1)	B.1.1.7	false	false	false	false	false	false	false	false	false
IMS-10122-CVDP-8B2BE327-0AEF-40A6-9FB8-5CA91A3CB556		RKI	ncov	Human	B.1.1.7	20I (Alpha, V1)	2021-04-06	Europe	Germany	Sachsen-Anhalt	Landkreis Dessau-Roßlau	Dessau	6847	51.8221	12.1917		20I (Alpha, V1)	B.1.1.7	false	false	false	false	false	false	false	false	false
IMS-10146-CVDP-651B972A-413E-4C6A-8321-4946BA0681B6		RKI	ncov	Human	B.1.1.7	20I (Alpha, V1)	2021-04-16	Europe	Germany	Baden-Württemberg	Landkreis Ulm; Stadt	Ulm	89073	48.4015	9.9927		20I (Alpha, V1)	B.1.1.7	false	false	false	false	false	false	false	false	false
IMS-10013-CVDP-E2D97000-CC1B-4674-AA34-55C574BB0912		RKI	ncov	Human	B.1.1.7	20I (Alpha, V1)	2021-04-23	Europe	Germany	Hamburg	Landkreis Hamburg; Freie und Hansestadt	Hamburg	21079	53.5722	10.0031		20I (Alpha, V1)	B.1.1.7	false	false	false	false	false	false	false	false	false
IMS-10203-CVDP-109565C4-C51F-482F-BFE5-6D5C5285034E		RKI	ncov	Human	B.1.1.7	20I (Alpha, V1)	2021-03-06	Europe	Germany	Hamburg	Landkreis Hamburg; Freie und Hansestadt	Hamburg	20095	53.5722	10.0031		20I (Alpha, V1)	B.1.1.7	false	false	false	false	false	false	false	false	false
IMS-10013-CVDP-FBA6650D-AECA-4E65-AF68-C66E93779CF5		RKI	ncov	Human	B.1.1.7	20I (Alpha, V1)	2021-03-19	Europe	Germany	Niedersachsen	Landkreis Region Hannover	Hannover	30163	52.3943	9.7475		20I (Alpha, V1)	B.1.1.7	false	false	false	false	false	false	false	false	false
IMS-10020-CVDP-5B3124BD-19F5-43DC-812E-D5DF8F27C151		RKI	ncov	Human	B.1.1.7	20I (Alpha, V1)	2021-02-11	Europe	Germany	Bayern	Landkreis Weiden i.d.OPf.	Weiden	92637	49.6768	12.1561		20I (Alpha, V1)	B.1.1.7	false	false	false	false	false	false	false	false	false
IMS-10020-CVDP-8DA6A574-2A32-4E6F-9EBA-45C8DB3DCE99		RKI	ncov	Human	B.1.1.7	20I (Alpha, V1)	2021-03-19	Europe	Germany	Rheinland-Pfalz	Landkreis Trier; kreisfreie Stadt	Trier	54290	49.7537	6.6393		20I (Alpha, V1)	B.1.1.7	false	false	false	false	false	false	false	false	false
IMS-10295-CVDP-AE1B5F53-44CB-4D3D-89B3-9A9E70892647		RKI	ncov	Human	Q.1	20I (Alpha, V1)	2021-02-18	Europe	Germany	Niedersachsen	Landkreis Region Hannover	Hannover	30623	52.3795	9.8075		20I (Alpha, V1)	Q.1	false	false	false	false	false	false	false	false	false
6166ba5b81e18c1c41ced28f	1024471544	IIMK	ncov	Human	B.1.1.7	20I (Alpha, V1)	2021-04-16	Europe	Germany	Thuringia	Landkreis Wartburgkreis	Bad Salzungen	36433	50.8117	10.2327	540	20I (Alpha, V1)	B.1.1.7	false	false	false	false	false	false	false	false	false
IMS-10013-CVDP-01578		RKI	ncov	Human	B.1.1.7	20I (Alpha, V1)	2021-02-04	Europe	Germany	Sachsen	Landkreis Nordsachsen	Wermsdorf	4779	51.2833	12.95		20I (Alpha, V1)	B.1.1.7	false	false	false	false	false	false	false	false	false
IMS-10020-CVDP-CF77C2F2-3D4A-4F90-9EB0-756C963C0033		RKI	ncov	Human	B.1.1.7	20I (Alpha, V1)	2021-02-18	Europe	Germany	Bayern	Landkreis Weiden i.d.OPf.	Weiden	92637	49.6768	12.1561		20I (Alpha, V1)	B.1.1.7	false	false	false	false	false	false	false	false	false
IMS-10020-CVDP-B7350BF8-082F-4A72-9920-90054F6E5755		RKI	ncov	Human	B.1.1.7	20I (Alpha, V1)	2021-04-05	Europe	Germany	Baden-Württemberg	Landkreis Esslingen	Leinfelden-Echterdingen	70771	48.6941	9.1681		20I (Alpha, V1)	B.1.1.7	false	false	false	false	false	false	false	false	false
6166ba5b81e18c1c41cecd8f	1091315941	IIMK	ncov	Human	B.1.1.7	20I (Alpha, V1)	2021-04-02	Europe	Germany	Thuringia	Landkreis Saale-Holzland-Kreis	Kahla	7768	50.802	11.5882	452	20I (Alpha, V1)	B.1.1.7	false	false	false	false	false	false	false	false	false
IMS-10020-CVDP-B820B73A-F273-46DC-A732-BEE67274394B		RKI	ncov	Human	B.1.1.7	20I (Alpha, V1)	2021-02-27	Europe	Germany	Baden-Württemberg	Landkreis Esslingen	Leinfelden-Echterdingen	70771	48.6941	9.1681		20I (Alpha, V1)	B.1.1.7	false	false	false	false	false	false	false	false	false
IMS-10023-CVDP-A310194A-1F49-4F79-A3D2-91AED2BB54FB		RKI	ncov	Human	B.1.1.7	20I (Alpha, V1)	2021-04-15	Europe	Germany	Sachsen	Landkreis Erzgebirgskreis	Neukirchen/Erzgebirge	9221	50.7835	12.87		20I (Alpha, V1)	B.1.1.7	false	false	false	false	false	false	false	false	false
IMS-10272-CVDP-B034AEB4-E99E-4C74-8444-F65D8EA28E29		RKI	ncov	Human	B.1.1.7	20I (Alpha, V1)	2021-03-09	Europe	Germany	Bayern	Landkreis München	Oberschleißheim	85764	48.25	11.5667		20I (Alpha, V1)	B.1.1.7	false	false	false	false	false	false	false	false	false
IMS-10370-CVDP-8410D35D-7A43-4D91-BC30-50C224B8BA28		RKI	ncov	Human	B.1.1.7	20I (Alpha, V1)	2021-03-18	Europe	Germany	Brandenburg	Kreisfreie Stadt Potsdam	Potsdam	14467	52.403	13.0626		20I (Alpha, V1)	B.1.1.7	false	false	false	false	false	false	false	false	false
IMS-10013-CVDP-A002B0A4-F23B-4B0D-A9B1-E5D2A39516E3		RKI	ncov	Human	B.1.1.7	20I (Alpha, V1)	2021-03-26	Europe	Germany	Sachsen	Landkreis Nordsachsen	Wermsdorf	4779	51.2833	12.95		20I (Alpha, V1)	B.1.1.7	false	false	false	false	false	false	false	false	false
IMS-10296-CVDP-F9630097-E083-4185-B617-65FBC2A1E410		RKI	ncov	Human	B.1.1.7	20I (Alpha, V1)	2021-03-01	Europe	Germany	Hessen	Landkreis Marburg-Biedenkopf	Marburg	35043	50.7765	8.7645		20I (Alpha, V1)	B.1.1.7	false	false	false	false	false	false	false	false	false
IMS-10267-CVDP-8AA6FF17-F64A-40A2-9F06-195C1F8D45A6		RKI	ncov	Human	B.1.1.7	20I (Alpha, V1)	2021-02-28	Europe	Germany	Nordrhein-Westfalen	Landkreis Dortmund; Stadt	Dortmund	44137	51.5097	7.4601		20I (Alpha, V1)	B.1.1.7	false	false	false	false	false	false	false	false	false
IMS-10150-CVDP-43153C7B-7F20-44D4-8C82-A335583BEEE5		RKI	ncov	Human	B.1.1.7	20I (Alpha, V1)	2021-04-24	Europe	Germany	Rheinland-Pfalz	Landkreis Trier; kreisfreie Stadt	Trier	54290	49.7537	6.6393		20I (Alpha, V1)	B.1.1.7	false	false	false	false	false	false	false	false	false
IMS-10227-CVDP-6941FAA6-6B47-4F35-9F49-527C618E6B61		RKI	ncov	Human	B.1.1.7	20I (Alpha, V1)	2021-04-08	Europe	Germany	Nordrhein-Westfalen	Landkreis Düsseldorf; Stadt	Düsseldorf	40477	51.2371	6.7795		20I (Alpha, V1)	B.1.1.7	false	false	false	false	false	false	false	false	false
6051fb9a2a30c4522feafe70	vi040747	IIMK	ncov	Human	B.1.1.7	20I (Alpha, V1)	2021-03-09	Europe	Germany	Thuringia	Landkreis Greiz	Ronneburg	7580	50.8628	12.1813	4078	20I (Alpha, V1)	B.1.1.7	false	false	false	false	false	false	false	false	false
IMS-10218-CVDP-039AA5CF-B2DC-49CB-88D5-7A1EE383A41C		RKI	ncov	Human	B.1.1.7	20I (Alpha, V1)	2021-03-18	Europe	Germany	Sachsen-Anhalt	Landkreis Landeshauptstadt Magdeburg	Magdeburg	39104	52.1243	11.6322		20I (Alpha, V1)	B.1.1.7	false	false	false	false	false	false	false	false	false
IMS-10375-CVDP-9B421425-E084-42EA-A71E-ECD146AC548A		RKI	ncov	Human	B.1.1.7	20I (Alpha, V1)	2021-03-27	Europe	Germany	Baden-Württemberg	Landkreis Heidelberg	Heidelberg	69120	49.4169	8.6764		20I (Alpha, V1)	B.1.1.7	false	false	false	false	false	false	false	false	false
IMS-10020-CVDP-3887BD49-40CA-4C9D-8F67-4CB64AB781C6		RKI	ncov	Human	B.1.1.7	20I (Alpha, V1)	2021-03-22	Europe	Germany	Baden-Württemberg	Landkreis Esslingen	Leinfelden-Echterdingen	70771	48.6941	9.1681		20I (Alpha, V1)	B.1.1.7	false	false	false	false	false	false	false	false	false
IMS-10020-CVDP-640907CB-9CD8-4568-9376-42B6C7C580A4		RKI	ncov	Human	B.1.1.7	20I (Alpha, V1)	2021-02-18	Europe	Germany	Nordrhein-Westfalen	Landkreis Leverkusen; Stadt	Leverkusen	51375	51.0331	7.052		20I (Alpha, V1)	B.1.1.7	false	false	false	false	false	false	false	false	false
IMS-10013-CVDP-CFD1EB37-10CC-4382-8F4B-26A86F0C881D		RKI	ncov	Human	B.1.1.7	20I (Alpha, V1)	2021-04-06	Europe	Germany	Sachsen	Landkreis Nordsachsen	Wermsdorf	4779	51.2833	12.95		20I (Alpha, V1)	B.1.1.7	false	false	false	false	false	false	false	false	false
IMS-10218-CVDP-02F3C774-73B2-42C3-8733-9A962A54467E		RKI	ncov	Human	B.1.1.7	20I (Alpha, V1)	2021-03-30	Europe	Germany	Sachsen-Anhalt	Landkreis Landeshauptstadt Magdeburg	Magdeburg	39104	52.1243	11.6322		20I (Alpha, V1)	B.1.1.7	false	false	false	false	false	false	false	false	false
IMS-10197-CVDP-822EBE4D-A631-406A-8A53-E72D2AA5EC3E		RKI	ncov	Human	B.1.1.7	20I (Alpha, V1)	2021-04-26	Europe	Germany	Sachsen-Anhalt	Landkreis Landeshauptstadt Magdeburg	Magdeburg	39124	52.1638	11.6333		20I (Alpha, V1)	B.1.1.7	false	false	false	false	false	false	false	false	false
IMS-10013-CVDP-ABAA6395-82FB-4E2C-A9F6-4F733F35AD76		RKI	ncov	Human	B.1.1.7	20I (Alpha, V1)	2021-03-30	Europe	Germany	Bremen	Kreisfreie Stadt Bremen	Bremen	28357	53.1178	8.8947		20I (Alpha, V1)	B.1.1.7	false	false	false	false	false	false	false	false	false
6166b85c81e18c1c41cec569	IMS-10013-CVDP-670e61a1-3e35-462a-b347-0074828918c7	IIMK	ncov	Human	B.1.1.7	20I (Alpha, V1)	2021-02-23	Europe	Germany	Thuringia	Landkreis Gotha	Dreigleichen	99869	50.8916	10.8103	25	20I (Alpha, V1)	B.1.1.7	false	false	false	false	false	false	false	false	false
IMS-10013-CVDP-308E34E1-D1DF-4AFB-A13E-64714DF525BC		RKI	ncov	Human	B.1.1.7	20I (Alpha, V1)	2021-03-24	Europe	Germany	Bayern	Landkreis Augsburg; Stadt	Augsburg	86154	48.3932	10.8814		20I (Alpha, V1)	B.1.1.7	false	false	false	false	false	false	false	false	false
IMS-10061-CVDP-AF623575-2066-4BBE-B892-9D04C41BEA44		RKI	ncov	Human	B.1.1.7	20I (Alpha, V1)	2021-03-30	Europe	Germany	Nordrhein-Westfalen	Landkreis Bielefeld; Stadt	Bielefeld	33602	52.0245	8.5326		20I (Alpha, V1)	B.1.1.7	false	false	false	false	false	false	false	false	false
IMS-10025-CVDP-00110		RKI	ncov	Human	B.1.1.7	20I (Alpha, V1)	2021-01-18	Europe	Germany	Berlin	Landkreis Berlin; Stadt	Berlin	10409	52.5443	13.4414		20I (Alpha, V1)	B.1.1.7	false	false	false	false	false	false	false	false	false
6166ba5c81e18c1c41cedbcd	1028301032	IIMK	ncov	Human	B.1.1.7	20I (Alpha, V1)	2021-03-16	Europe	Germany	Thuringia	Landkreis Kyffhäuserkreis	Sondershausen	99706	51.3677	10.8675	1205	20I (Alpha, V1)	Q.7	false	false	false	false	false	false	false	false	false
IMS-10261-CVDP-C46E3604-643F-4E55-8474-EF27EDF8FAAE		RKI	ncov	Human	B.1.1.7	20I (Alpha, V1)	2021-02-08	Europe	Germany	Nordrhein-Westfalen	Landkreis Lippe	Bad Salzuflen	32105	52.0808	8.7505		20I (Alpha, V1)	B.1.1.7	false	false	false	false	false	false	false	false	false
IMS-10061-CVDP-1A9C13D1-B3E8-436A-8677-043131AC12E9		RKI	ncov	Human	B.1.1.7	20I (Alpha, V1)	2021-03-08	Europe	Germany	Niedersachsen	Landkreis Hameln-Pyrmont	Hameln	31785	52.1037	9.3676		20I (Alpha, V1)	B.1.1.7	false	false	false	false	false	false	false	false	false
IMS-10082-CVDP-5267B68A-334F-40B7-8ABE-B2B47EFF145F		RKI	ncov	Human	B.1.1.7	20I (Alpha, V1)	2021-03-25	Europe	Germany	Nordrhein-Westfalen	Landkreis Bochum; Stadt	Bochum	44879	51.4271	7.1543		20I (Alpha, V1)	B.1.1.7	false	false	false	false	false	false	false	false	false
IMS-10116-CVDP-35038544-51F4-4AC7-B056-940181CA3E2A		RKI	ncov	Human	B.1.1.7	20I (Alpha, V1)	2021-05-03	Europe	Germany	Nordrhein-Westfalen	Landkreis Essen; Stadt	Essen	45326	51.4844	7.005		20I (Alpha, V1)	B.1.1.7	false	false	false	false	false	false	false	false	false
IMS-10146-CVDP-C21FF444-5FCC-40F6-A1AE-C749D2623711		RKI	ncov	Human	B.1.1.7	20I (Alpha, V1)	2021-03-30	Europe	Germany	Baden-Württemberg	Landkreis Ulm; Stadt	Ulm	89073	48.4015	9.9927		20I (Alpha, V1)	B.1.1.7	false	false	false	false	false	false	false	false	false
IMS-10020-CVDP-A49C54D0-670E-47F6-85C7-B34ECDB43ED6		RKI	ncov	Human	B.1.1.7	20I (Alpha, V1)	2021-03-26	Europe	Germany	Rheinland-Pfalz	Landkreis Trier; kreisfreie Stadt	Trier	54290	49.7537	6.6393		20I (Alpha, V1)	B.1.1.7	false	false	false	false	false	false	false	false	false
IMS-10013-CVDP-D2973887-7CF5-4963-80FE-891C6218987E		RKI	ncov	Human	B.1.1.7	20I (Alpha, V1)	2021-02-16	Europe	Germany	Hamburg	Landkreis Hamburg; Freie und Hansestadt	Hamburg	21079	53.5722	10.0031		20I (Alpha, V1)	B.1.1.7	false	false	false	false	false	false	false	false	false
IMS-10122-CVDP-68E087C1-CEFE-4589-8776-672422DD30E4		RKI	ncov	Human	B.1.1.7	20I (Alpha, V1)	2021-02-16	Europe	Germany	Baden-Württemberg	Landkreis Karlsruhe	Karlsruhe	76131	49.0078	8.4199		20I (Alpha, V1)	B.1.1.7	false	false	false	false	false	false	false	false	false
IMS-10122-CVDP-8DD61385-50CD-4794-9702-26E5C2FB75A6		RKI	ncov	Human	B.1.1.7	20I (Alpha, V1)	2021-04-24	Europe	Germany	Baden-Württemberg	Landkreis Karlsruhe	Karlsruhe	76131	49.0078	8.4199		20I (Alpha, V1)	B.1.1.7	false	false	false	false	false	false	false	false	false
IMS-10375-CVDP-C44F3BC2-2240-4661-9D29-01DAFC3F9D94		RKI	ncov	Human	B.1.1.7	20I (Alpha, V1)	2021-04-17	Europe	Germany	Baden-Württemberg	Landkreis Heidelberg	Heidelberg	69120	49.4169	8.6764		20I (Alpha, V1)	B.1.1.7	false	false	false	false	false	false	false	false	false
IMS-10004-CVDP-B1015595-5D88-428A-9708-530C2314823F		RKI	ncov	Human	B.1.1.7	20I (Alpha, V1)	2021-04-20	Europe	Germany	Schleswig-Holstein	Kreis Herzogtum Lauenburg	Kreis Herzogtum Lauenburg	21502	53.5966	10.5762		20I (Alpha, V1)	Q.7	false	false	false	false	false	false	false	false	false
IMS-10375-CVDP-2F9AB783-5F7A-4A49-8813-093925304212		RKI	ncov	Human	B.1.1.7	20I (Alpha, V1)	2021-02-23	Europe	Germany	Baden-Württemberg	Landkreis Heidelberg	Heidelberg	69120	49.4169	8.6764		20I (Alpha, V1)	B.1.1.7	false	false	false	false	false	false	false	false	false
IMS-10033-CVDP-B3280E61-5DFE-43A0-847E-92676E7C3D28		RKI	ncov	Human	B.1.1.7	20I (Alpha, V1)	2021-01-17	Europe	Germany	Schleswig-Holstein	Kreisfreie Stadt Kiel	Kiel	24106	54.3506	10.1205		20I (Alpha, V1)	B.1.1.7	false	false	false	false	false	false	false	false	false
IMS-10020-CVDP-98FBCF64-75FD-4983-984E-1E9E13502DA4		RKI	ncov	Human	B.1.1.7	20I (Alpha, V1)	2021-03-26	Europe	Germany	Bayern	Landkreis Weiden i.d.OPf.	Weiden	92637	49.6768	12.1561		20I (Alpha, V1)	B.1.1.7	false	false	false	false	false	false	false	false	false
IMS-10013-CVDP-5F48EAAB-48AA-4200-B80E-45C54291E3F4		RKI	ncov	Human	B.1.1.7	20I (Alpha, V1)	2021-04-09	Europe	Germany	Hamburg	Landkreis Hamburg; Freie und Hansestadt	Hamburg	22453	53.5722	10.0031		20I (Alpha, V1)	B.1.1.7	false	false	false	false	false	false	false	false	false
IMS-10203-CVDP-00043		RKI	ncov	Human	B.1.1.7	20I (Alpha, V1)	2021-01-26	Europe	Germany	Hamburg	Landkreis Hamburg; Freie und Hansestadt	Hamburg	20095	53.5722	10.0031		20I (Alpha, V1)	B.1.1.7	false	false	false	false	false	false	false	false	false
IMS-10020-CVDP-E9805312-CB14-4176-83D8-69B5D6C46819		RKI	ncov	Human	B.1.1.7	20I (Alpha, V1)	2021-03-17	Europe	Germany	Baden-Württemberg	Landkreis Esslingen	Leinfelden-Echterdingen	70771	48.6941	9.1681		20I (Alpha, V1)	B.1.1.7	false	false	false	false	false	false	false	false	false
IMS-10020-CVDP-46AFB29F-D2C0-4E53-ADA3-56399A05D169		RKI	ncov	Human	B.1.1.7	20I (Alpha, V1)	2021-03-29	Europe	Germany	Berlin	Landkreis Berlin; Stadt	Berlin	10829	52.4761	13.3607		20I (Alpha, V1)	B.1.1.7	false	false	false	false	false	false	false	false	false
IMS-10020-CVDP-AE0A6F29-C40A-4B9C-976A-178C0D3BB301		RKI	ncov	Human	B.1.1.7	20I (Alpha, V1)	2021-04-03	Europe	Germany	Baden-Württemberg	Landkreis Esslingen	Leinfelden-Echterdingen	70771	48.6941	9.1681		20I (Alpha, V1)	B.1.1.7	false	false	false	false	false	false	false	false	false
IMS-10013-CVDP-89E057C0-B9A2-4F09-B69C-4D6D64C9A1C3		RKI	ncov	Human	B.1.1.7	20I (Alpha, V1)	2021-04-14	Europe	Germany	Sachsen	Landkreis Meißen	Landkreis Meißen	1665	51.2393	13.4717		20I (Alpha, V1)	B.1.1.7	false	false	false	false	false	false	false	false	false
6166ba5b81e18c1c41ced624	1050219292	IIMK	ncov	Human	B.1.1.7	20I (Alpha, V1)	2021-04-27	Europe	Germany	Thuringia	Landkreis Gera	Gera	7545	50.8753	12.0788	514	20I (Alpha, V1)	B.1.1.7	false	false	false	false	false	false	false	false	false
6166ba5b81e18c1c41ced011	1091322350	IIMK	ncov	Human	B.1.1.7	20I (Alpha, V1)	2021-04-09	Europe	Germany	Thuringia	Landkreis Ilm-Kreis	Arnstadt	99310	50.8343	10.9456	81	20I (Alpha, V1)	B.1.1.7	false	false	false	false	false	false	false	false	false
IMS-10020-CVDP-D15EDC90-AE5F-4EA4-98EA-E2FE1F53C359		RKI	ncov	Human	B.1.1.7	20I (Alpha, V1)	2021-03-31	Europe	Germany	Rheinland-Pfalz	Landkreis Trier; kreisfreie Stadt	Trier	54290	49.7537	6.6393		20I (Alpha, V1)	B.1.1.7	false	false	false	false	false	false	false	false	false
6166b85c81e18c1c41cec8b5	IMS-10013-CVDP-75be3f2e-b988-4f39-ad41-7a8fa7f2dc2f	IIMK	ncov	Human	B.1.1.7	20I (Alpha, V1)	2021-05-11	Europe	Germany	Thuringia	Landkreis Erfurt; Stadt	Erfurt	99098	50.9775	11.0251	21	20I (Alpha, V1)	B.1.1.7	false	false	false	false	false	false	false	false	false
6166ba5c81e18c1c41ceda9b	1091294443	IIMK	ncov	Human	B.1.1.7	20I (Alpha, V1)	2021-03-12	Europe	Germany	Thuringia	Landkreis Eichsfeld	Leinefelde	37327	51.3887	10.3268	250	20I (Alpha, V1)	B.1.1.7	false	false	false	false	false	false	false	false	false
IMS-10020-CVDP-089CF85A-0143-452E-8FFE-7C8363C6972E		RKI	ncov	Human	B.1.1.7	20I (Alpha, V1)	2021-03-11	Europe	Germany	Rheinland-Pfalz	Landkreis Trier; kreisfreie Stadt	Trier	54290	49.7537	6.6393		20I (Alpha, V1)	B.1.1.7	false	false	false	false	false	false	false	false	false
IMS-10150-CVDP-085D3E4B-8ECE-487B-87A6-E89A130593F5		RKI	ncov	Human	B.1.1.7	20I (Alpha, V1)	2021-04-20	Europe	Germany	Nordrhein-Westfalen	Landkreis Leverkusen; Stadt	Leverkusen	51375	51.0331	7.052		20I (Alpha, V1)	B.1.1.7	false	false	false	false	false	false	false	false	false
IMS-10150-CVDP-3D419938-68D1-4DDC-822F-B6688BC8C703		RKI	ncov	Human	B.1.1.7	20I (Alpha, V1)	2021-05-07	Europe	Germany	Nordrhein-Westfalen	Landkreis Leverkusen; Stadt	Leverkusen	51375	51.0331	7.052		20I (Alpha, V1)	B.1.1.7	false	false	false	false	false	false	false	false	false
IMS-10209-CVDP-D518D0D5-22E3-4EAB-A90C-ACADA6502463		RKI	ncov	Human	B.1.1.7	20I (Alpha, V1)	2021-04-05	Europe	Germany	Baden-Württemberg	Landkreis Konstanz	Konstanz	78467	47.6744	9.1649		20I (Alpha, V1)	B.1.1.7	false	false	false	false	false	false	false	false	false
6166ba5c81e18c1c41ceda32	1050164979	IIMK	ncov	Human	B.1.1.7	20I (Alpha, V1)	2021-03-08	Europe	Germany	Thuringia	Landkreis Greiz	Ronneburg	7580	50.8628	12.1813	1166	20I (Alpha, V1)	B.1.1.7	false	false	false	false	false	false	false	false	false
IMS-10087-CVDP-C99EE4A3-6C38-4CF9-BFFC-C0B338DCF37C		RKI	ncov	Human	B.1.1.7	20I (Alpha, V1)	2021-03-18	Europe	Germany	Nordrhein-Westfalen	Landkreis Köln; Stadt	Köln	50858	50.9243	6.8565		20I (Alpha, V1)	B.1.1.7	false	false	false	false	false	false	false	false	false
IMS-10020-CVDP-48D849A6-2017-456C-ADEB-433FBAD12F6F		RKI	ncov	Human	B.1.1.7	20I (Alpha, V1)	2021-04-15	Europe	Germany	Baden-Württemberg	Landkreis Esslingen	Leinfelden-Echterdingen	70771	48.6941	9.1681		20I (Alpha, V1)	B.1.1.7	false	false	false	false	false	false	false	false	false
IMS-10150-CVDP-E539BFE8-55C9-4914-BA2A-365C8054EC61		RKI	ncov	Human	B.1.1.7	20I (Alpha, V1)	2021-05-04	Europe	Germany	Rheinland-Pfalz	Landkreis Trier; kreisfreie Stadt	Trier	54290	49.7537	6.6393		20I (Alpha, V1)	B.1.1.7	false	false	false	false	false	false	false	false	false
IMS-10375-CVDP-4249AA9B-4650-4F8D-8B27-DD932D30FBB7		RKI	ncov	Human	B.1.1.7	20I (Alpha, V1)	2021-03-09	Europe	Germany	Baden-Württemberg	Landkreis Heidelberg	Heidelberg	69120	49.4169	8.6764		20I (Alpha, V1)	B.1.1.7	false	false	false	false	false	false	false	false	false
IMS-10117-CVDP-C8D3BC71-7F10-40C8-B8D0-BE867A4642AA		RKI	ncov	Human	B.1.1.7	20I (Alpha, V1)	2021-04-22	Europe	Germany	Baden-Württemberg	Landkreis Rhein-Neckar-Kreis	Eppelheim	69214	49.4019	8.6364		20I (Alpha, V1)	B.1.1.7	false	false	false	false	false	false	false	false	false
IMS-10013-CVDP-82EFC01B-93AE-45A9-ABCE-02B0236CB3F9		RKI	ncov	Human	B.1.1.7	20I (Alpha, V1)	2021-04-01	Europe	Germany	Berlin	Landkreis Berlin; Stadt	Berlin	14197	52.4734	13.3118		20I (Alpha, V1)	B.1.1.7	false	false	false	false	false	false	false	false	false
6166ba5b81e18c1c41ced640	1091337975	IIMK	ncov	Human	B.1.1.7	20I (Alpha, V1)	2021-04-27	Europe	Germany	Thuringia	Landkreis Unstrut-Hainich-Kreis	Mühlhausen	99974	51.2088	10.459	1223	20I (Alpha, V1)	B.1.1.7	false	false	false	false	false	false	false	false	false
6166ba5c81e18c1c41cedf7c	5002427595	IIMK	ncov	Human	B.1.1.7	20I (Alpha, V1)	2021-04-01	Europe	Germany	Thuringia	Landkreis Altenburger Land	Nobitz	4603	50.9771	12.4859	71	20I (Alpha, V1)	B.1.1.7	false	false	false	false	false	false	false	false	false
IMS-10150-CVDP-927B5A54-7738-4F69-A626-C0321F1DB53F		RKI	ncov	Human	B.1.1.7	20I (Alpha, V1)	2021-04-30	Europe	Germany	Nordrhein-Westfalen	Landkreis Leverkusen; Stadt	Leverkusen	51375	51.0331	7.052		20I (Alpha, V1)	B.1.1.7	false	false	false	false	false	false	false	false	false
IMS-10122-CVDP-A351C924-9ACD-4F49-9FC1-D3F6841D75C8		RKI	ncov	Human	B.1.1.7	20I (Alpha, V1)	2021-02-19	Europe	Germany	Baden-Württemberg	Landkreis Karlsruhe	Karlsruhe	76131	49.0078	8.4199		20I (Alpha, V1)	B.1.1.7	false	false	false	false	false	false	false	false	false
IMS-10257-CVDP-284E7CA7-C9A1-4863-908D-E32E344F2041		RKI	ncov	Human	B.1.1.7	20I (Alpha, V1)	2021-04-12	Europe	Germany	Hessen	Landkreis Frankfurt am Main; Stadt	Frankfurt am Main	65926	50.096	8.7111		20I (Alpha, V1)	B.1.1.7	false	false	false	false	false	false	false	false	false
IMS-10267-CVDP-7011F61D-7F59-43D8-BF0F-14AF93C5C2F8		RKI	ncov	Human	B.1.1.7	20I (Alpha, V1)	2021-04-28	Europe	Germany	Nordrhein-Westfalen	Landkreis Dortmund; Stadt	Dortmund	44137	51.5097	7.4601		20I (Alpha, V1)	B.1.1.7	false	false	false	false	false	false	false	false	false
IMS-10087-CVDP-75EC74E7-B953-4D6D-A941-6F255728A477		RKI	ncov	Human	B.1.1.7	20I (Alpha, V1)	2021-05-03	Europe	Germany	Nordrhein-Westfalen	Landkreis Köln; Stadt	Köln	50858	50.9243	6.8565		20I (Alpha, V1)	B.1.1.7	false	false	false	false	false	false	false	false	false
IMS-10261-CVDP-AE1D1F1A-CC17-44E9-ADCA-54C40C44C18A		RKI	ncov	Human	B.1.1.7	20I (Alpha, V1)	2021-02-24	Europe	Germany	Nordrhein-Westfalen	Landkreis Lippe	Bad Salzuflen	32105	52.0808	8.7505		20I (Alpha, V1)	B.1.1.7	false	false	false	false	false	false	false	false	false
IMS-10013-CVDP-EC65115B-026A-44A9-8777-CACBC6B235AE		RKI	ncov	Human	B.1.1.7	20I (Alpha, V1)	2021-04-07	Europe	Germany	Rheinland-Pfalz	Landkreis Mainz; kreisfreie Stadt	Mainz	55129	49.9661	8.2663		20I (Alpha, V1)	B.1.1.7	false	false	false	false	false	false	false	false	false
IMS-10117-CVDP-B665FD99-C385-4A51-AA7E-1998734F186F		RKI	ncov	Human	B.1.1.7	20I (Alpha, V1)	2021-04-01	Europe	Germany	Nordrhein-Westfalen	Landkreis Leverkusen; Stadt	Leverkusen	51375	51.0331	7.052		20I (Alpha, V1)	B.1.1.7	false	false	false	false	false	false	false	false	false
IMS-10587-CVDP-56A9B39F-DFDC-4F58-AF60-8226958FAA25		RKI	ncov	Human	B.1.1.7	20I (Alpha, V1)	2021-03-21	Europe	Germany	Hamburg	Landkreis Hamburg; Freie und Hansestadt	Hamburg	20095	53.5722	10.0031		20I (Alpha, V1)	B.1.1.7	false	false	false	false	false	false	false	false	false
IMS-10294-CVDP-666		RKI	ncov	Human	B.1.1.7	20I (Alpha, V1)	2021-02-09	Europe	Germany	Nordrhein-Westfalen	Landkreis Düsseldorf; Stadt	Düsseldorf	40210	51.2216	6.7897		20I (Alpha, V1)	B.1.1.7	false	false	false	false	false	false	false	false	false
IMS-10020-CVDP-5F744869-6391-49B7-9A48-2E202674199C		RKI	ncov	Human	B.1.1.7	20I (Alpha, V1)	2021-03-21	Europe	Germany	Baden-Württemberg	Landkreis Esslingen	Leinfelden-Echterdingen	70771	48.6941	9.1681		20I (Alpha, V1)	B.1.1.7	false	false	false	false	false	false	false	false	false
IMS-10150-CVDP-5CE57DDA-EAB0-4994-9998-BA50E64D5246		RKI	ncov	Human	B.1.1.7	20I (Alpha, V1)	2021-05-05	Europe	Germany	Rheinland-Pfalz	Landkreis Trier; kreisfreie Stadt	Trier	54290	49.7537	6.6393		20I (Alpha, V1)	B.1.1.7	false	false	false	false	false	false	false	false	false
IMS-10565-CVDP-7A4C54ED-8317-42D6-8450-A7E9E16BBD5D		RKI	ncov	Human	B.1.1.7	20I (Alpha, V1)	2021-02-19	Europe	Germany	Schleswig-Holstein	Landkreis Lübeck; Hansestadt	Lübeck	23538	53.8696	10.6871		20I (Alpha, V1)	B.1.1.7	false	false	false	false	false	false	false	false	false
IMS-10272-CVDP-83002F51-CC44-4DF7-B532-706F146994C5		RKI	ncov	Human	B.1.1.7	20I (Alpha, V1)	2021-03-31	Europe	Germany	Bayern	Landkreis München	Oberschleißheim	85764	48.25	11.5667		20I (Alpha, V1)	B.1.1.7	false	false	false	false	false	false	false	false	false
IMS-10087-CVDP-63E15805-1A30-4385-BAC5-5D6AED3BF34F		RKI	ncov	Human	B.1.1.7	20I (Alpha, V1)	2021-03-29	Europe	Germany	Nordrhein-Westfalen	Landkreis Köln; Stadt	Köln	50858	50.9243	6.8565		20I (Alpha, V1)	B.1.1.7	false	false	false	false	false	false	false	false	false
IMS-10122-CVDP-29DA84D2-14E3-4A60-A1E9-DD6A5D13B704		RKI	ncov	Human	B.1.1.7	20I (Alpha, V1)	2021-03-23	Europe	Germany	Sachsen	Kreisfreie Stadt Dresden	Dresden	1239	51.0066	13.8089		20I (Alpha, V1)	B.1.1.7	false	false	false	false	false	false	false	false	false
IMS-10122-CVDP-496		RKI	ncov	Human	B.1.1.7	20I (Alpha, V1)	2021-02-04	Europe	Germany	Baden-Württemberg	Landkreis Karlsruhe	Karlsruhe	76131	49.0078	8.4199		20I (Alpha, V1)	B.1.1.7	false	false	false	false	false	false	false	false	false
IMS-10036-CVDP-DA854788-D496-4E3D-A8B7-EDC590C0DDD2		RKI	ncov	Human	B.1.1.7	20I (Alpha, V1)	2021-03-22	Europe	Germany	Berlin	Landkreis Berlin; Stadt	Berlin	12247	52.4395	13.3462		20I (Alpha, V1)	B.1.1.7	false	false	false	false	false	false	false	false	false
IMS-10013-CVDP-6A254CCF-C47E-4AD6-A2D5-64EC482EE516		RKI	ncov	Human	B.1.1.7	20I (Alpha, V1)	2021-02-23	Europe	Germany	Rheinland-Pfalz	Landkreis Mainz; kreisfreie Stadt	Mainz	55129	49.9661	8.2663		20I (Alpha, V1)	B.1.1.7	false	false	false	false	false	false	false	false	false
IMS-10267-CVDP-A46A62BF-5B0B-4433-8B77-7F8821FB8D0C		RKI	ncov	Human	B.1.1.7	20I (Alpha, V1)	2021-04-17	Europe	Germany	Nordrhein-Westfalen	Landkreis Dortmund; Stadt	Dortmund	44137	51.5097	7.4601		20I (Alpha, V1)	B.1.1.7	false	false	false	false	false	false	false	false	false
IMS-10013-CVDP-CE8F6EFD-28B4-4266-A565-5F010400A533		RKI	ncov	Human	B.1.1.7	20I (Alpha, V1)	2021-03-24	Europe	Germany	Sachsen	Landkreis Nordsachsen	Wermsdorf	4779	51.2833	12.95		20I (Alpha, V1)	B.1.1.7	false	false	false	false	false	false	false	false	false
6166ba5b81e18c1c41ced346	1091331982	IIMK	ncov	Human	B.1.1.7	20I (Alpha, V1)	2021-04-20	Europe	Germany	Thuringia	Landkreis Unstrut-Hainich-Kreis	Vogtei	99986	51.14	10.3993	955	20I (Alpha, V1)	B.1.1.7	false	false	false	false	false	false	false	false	false
IMS-10117-CVDP-75E3ADEE-B04B-462F-97F2-428C70C055B3		RKI	ncov	Human	B.1.1.7	20I (Alpha, V1)	2021-04-26	Europe	Germany	Baden-Württemberg	Landkreis Rhein-Neckar-Kreis	Eppelheim	69214	49.4019	8.6364		20I (Alpha, V1)	B.1.1.7	false	false	false	false	false	false	false	false	false
6166ba5b81e18c1c41ced501	1091335453	IIMK	ncov	Human	B.1.1.7	20I (Alpha, V1)	2021-04-22	Europe	Germany	Thuringia	Landkreis Weimar; Stadt	Weimar	99423	50.9803	11.3272	150	20I (Alpha, V1)	B.1.1.7	false	false	false	false	false	false	false	false	false
IMS-10013-CVDP-AD2B8075-7E1D-48A1-9E9C-F3A28A4396BA		RKI	ncov	Human	B.1.1.7	20I (Alpha, V1)	2021-02-26	Europe	Germany	Hamburg	Landkreis Hamburg; Freie und Hansestadt	Hamburg	21079	53.5722	10.0031		20I (Alpha, V1)	B.1.1.7	false	false	false	false	false	false	false	false	false
IMS-10020-CVDP-D0D78468-9C1C-4C4A-8231-4B45B63A0BA8		RKI	ncov	Human	B.1.1.7	20I (Alpha, V1)	2021-03-08	Europe	Germany	Baden-Württemberg	Landkreis Esslingen	Leinfelden-Echterdingen	70771	48.6941	9.1681		20I (Alpha, V1)	Q.7	false	false	false	false	false	false	false	false	false
IMS-10020-CVDP-64DA9831-F67B-4D1E-AECC-DC286F710BEE		RKI	ncov	Human	B.1.1.7	20I (Alpha, V1)	2021-03-08	Europe	Germany	Baden-Württemberg	Landkreis Esslingen	Leinfelden-Echterdingen	70771	48.6941	9.1681		20I (Alpha, V1)	B.1.1.7	false	false	false	false	false	false	false	false	false
IMS-10013-CVDP-A4E0C6A5-A560-46C5-9A7B-1C2ECC9903AE		RKI	ncov	Human	B.1.1.7	20I (Alpha, V1)	2021-03-26	Europe	Germany	Sachsen	Landkreis Nordsachsen	Wermsdorf	4779	51.2833	12.95		20I (Alpha, V1)	B.1.1.7	false	false	false	false	false	false	false	false	false
IMS-10146-CVDP-152A7BEA-3751-469D-88E0-84CEDA4034A6		RKI	ncov	Human	B.1.1.7	20I (Alpha, V1)	2021-05-04	Europe	Germany	Baden-Württemberg	Landkreis Ulm; Stadt	Ulm	89073	48.4015	9.9927		20I (Alpha, V1)	Q.7	false	false	false	false	false	false	false	false	false
IMS-10565-CVDP-E32BA029-4E55-4984-97AE-01BBBD24EB83		RKI	ncov	Human	B.1.1.7	20I (Alpha, V1)	2021-03-13	Europe	Germany	Hamburg	Landkreis Hamburg; Freie und Hansestadt	Hamburg	20095	53.5722	10.0031		20I (Alpha, V1)	B.1.1.7	false	false	false	false	false	false	false	false	false
IMS-10218-CVDP-80E3C554-23CE-498D-9178-A47716061A06		RKI	ncov	Human	B.1.1.7	20I (Alpha, V1)	2021-03-10	Europe	Germany	Sachsen-Anhalt	Landkreis Landeshauptstadt Magdeburg	Magdeburg	39104	52.1243	11.6322		20I (Alpha, V1)	B.1.1.7	false	false	false	false	false	false	false	false	true
IMS-10020-CVDP-2972D05A-6C74-41B6-B79A-0F6E7A4EC405		RKI	ncov	Human	B.1.1.7	20I (Alpha, V1)	2021-02-16	Europe	Germany	Bayern	Landkreis Weiden i.d.OPf.	Weiden	92637	49.6768	12.1561		20I (Alpha, V1)	B.1.1.7	false	false	false	false	false	false	false	false	false
IMS-10087-CVDP-5DD93057-A68F-4FA0-9654-072DF9E2E476		RKI	ncov	Human	B.1.1.7	20I (Alpha, V1)	2021-05-04	Europe	Germany	Nordrhein-Westfalen	Landkreis Köln; Stadt	Köln	50858	50.9243	6.8565		20I (Alpha, V1)	B.1.1.7	false	false	false	false	false	false	false	false	false
IMS-10020-CVDP-C2899944-DADB-40AF-9206-CFE419C964C7		RKI	ncov	Human	B.1.1.7	20I (Alpha, V1)	2021-03-24	Europe	Germany	Rheinland-Pfalz	Landkreis Trier; kreisfreie Stadt	Trier	54290	49.7537	6.6393		20I (Alpha, V1)	B.1.1.7	false	false	false	false	false	false	false	false	false
IMS-10116-CVDP-45954428-4746-4349-99C9-E0A225CEB23F		RKI	ncov	Human	B.1.1.7	20I (Alpha, V1)	2021-03-29	Europe	Germany	Berlin	Landkreis Berlin; Stadt	Berlin	13407	52.5727	13.3512		20I (Alpha, V1)	B.1.1.7	false	false	false	false	false	false	false	false	false
IMS-10004-CVDP-11BAF493-73E8-42C5-AC87-E8616957A7BE		RKI	ncov	Human	B.1.1.7	20I (Alpha, V1)	2021-03-05	Europe	Germany	Schleswig-Holstein	Kreis Herzogtum Lauenburg	Kreis Herzogtum Lauenburg	21502	53.5966	10.5762		20I (Alpha, V1)	B.1.1.7	false	false	false	false	false	false	false	false	false
IMS-10150-CVDP-48BC4649-7074-49AE-9BFE-DE413B8DEC91		RKI	ncov	Human	B.1.1.7	20I (Alpha, V1)	2021-04-29	Europe	Germany	Nordrhein-Westfalen	Landkreis Leverkusen; Stadt	Leverkusen	51375	51.0331	7.052		20I (Alpha, V1)	B.1.1.7	false	false	false	false	false	false	false	false	false
IMS-10013-CVDP-2F82C480-783D-4AE3-8287-9639BB7D1A32		RKI	ncov	Human	B.1.1.7	20I (Alpha, V1)	2021-03-20	Europe	Germany	Rheinland-Pfalz	Landkreis Mainz; kreisfreie Stadt	Mainz	55129	49.9661	8.2663		20I (Alpha, V1)	B.1.1.7	false	false	false	false	false	false	false	false	false
IMS-10020-CVDP-5318A0C2-C890-42A4-94EF-1B88770FA317		RKI	ncov	Human	B.1.1.7	20I (Alpha, V1)	2021-03-12	Europe	Germany	Baden-Württemberg	Landkreis Esslingen	Leinfelden-Echterdingen	70771	48.6941	9.1681		20I (Alpha, V1)	B.1.1.7	false	false	false	false	false	false	false	false	false
IMS-10261-CVDP-E0601128-0A6D-4E61-9B61-1E577DD270C4		RKI	ncov	Human	B.1.1.7	20I (Alpha, V1)	2021-02-19	Europe	Germany	Nordrhein-Westfalen	Landkreis Lippe	Bad Salzuflen	32105	52.0808	8.7505		20I (Alpha, V1)	B.1.1.7	false	false	false	false	false	false	false	false	false
IMS-10020-CVDP-1E408854-3CDB-42A3-B69C-5E532E44C87B		RKI	ncov	Human	B.1.1.7	20I (Alpha, V1)	2021-04-12	Europe	Germany	Berlin	Landkreis Berlin; Stadt	Berlin	10829	52.4761	13.3607		20I (Alpha, V1)	B.1.1.7	false	false	false	false	false	false	false	false	false
IMS-10150-CVDP-B5D60420-F144-4F26-8829-1672C799510C		RKI	ncov	Human	B.1.1.7	20I (Alpha, V1)	2021-04-27	Europe	Germany	Nordrhein-Westfalen	Landkreis Leverkusen; Stadt	Leverkusen	51375	51.0331	7.052		20I (Alpha, V1)	B.1.1.7	false	false	false	false	false	false	false	false	false
IMS-10023-CVDP-7D7C5355-9961-45DE-8347-A12C5FE5AA7C		RKI	ncov	Human	B.1.1.7	20I (Alpha, V1)	2021-04-13	Europe	Germany	Sachsen	Landkreis Erzgebirgskreis	Neukirchen/Erzgebirge	9221	50.7835	12.87		20I (Alpha, V1)	B.1.1.7	false	false	false	false	false	false	false	false	false
IMS-10267-CVDP-A7B1AAE5-3E97-4B90-AD76-83AB72DC037B		RKI	ncov	Human	B.1.1.7	20I (Alpha, V1)	2021-04-23	Europe	Germany	Nordrhein-Westfalen	Landkreis Dortmund; Stadt	Dortmund	44137	51.5097	7.4601		20I (Alpha, V1)	B.1.1.7	false	false	false	false	false	false	false	false	false
IMS-10020-CVDP-715835E9-DF93-429D-8B3C-14BDE0FD61BC		RKI	ncov	Human	B.1.1.7	20I (Alpha, V1)	2021-02-13	Europe	Germany	Bayern	Landkreis Weiden i.d.OPf.	Weiden	92637	49.6768	12.1561		20I (Alpha, V1)	B.1.1.7	false	false	false	false	false	false	false	false	false
IMS-10020-CVDP-F202EE59-E268-4B44-9599-DCC0E37A5852		RKI	ncov	Human	B.1.1.7	20I (Alpha, V1)	2021-03-15	Europe	Germany	Berlin	Landkreis Berlin; Stadt	Berlin	10829	52.4761	13.3607		20I (Alpha, V1)	B.1.1.7	false	false	false	false	false	false	false	false	false
IMS-10122-CVDP-46840CFB-5A13-4D14-8632-AC2597DCC1C1		RKI	ncov	Human	B.1.1.7	20I (Alpha, V1)	2021-03-23	Europe	Germany	Sachsen	Kreisfreie Stadt Leipzig	Leipzig	4289	51.3667	12.3833		20I (Alpha, V1)	B.1.1.7	true	false	false	false	false	false	false	false	false
IMS-10375-CVDP-D2A4813C-FE4F-4C00-A830-7E580A92BDE3		RKI	ncov	Human	B.1.1.7	20I (Alpha, V1)	2021-04-09	Europe	Germany	Baden-Württemberg	Landkreis Heidelberg	Heidelberg	69120	49.4169	8.6764		20I (Alpha, V1)	B.1.1.7	false	false	false	false	false	false	false	false	false
IMS-10020-CVDP-04C70410-BB28-4A76-AFF0-3FAE28226370		RKI	ncov	Human	B.1.1.7	20I (Alpha, V1)	2021-03-23	Europe	Germany	Baden-Württemberg	Landkreis Esslingen	Leinfelden-Echterdingen	70771	48.6941	9.1681		20I (Alpha, V1)	B.1.1.7	false	false	false	false	false	false	false	false	false
IMS-10565-CVDP-CC515FC0-B93A-4327-A48C-1B0ABBACDFEF		RKI	ncov	Human	B.1.1.7	20I (Alpha, V1)	2021-04-11	Europe	Germany	Hamburg	Landkreis Hamburg; Freie und Hansestadt	Hamburg	20095	53.5722	10.0031		20I (Alpha, V1)	B.1.1.7	false	false	false	false	false	false	false	false	false
IMS-10116-CVDP-D637F4E5-B893-45B8-89AB-DEA7E1FDF950		RKI	ncov	Human	B.1.1.7	20I (Alpha, V1)	2021-02-25	Europe	Germany	Baden-Württemberg	Landkreis Heidelberg	Heidelberg	69126	49.3757	8.6911		20I (Alpha, V1)	B.1.1.7	false	false	false	false	false	false	false	false	false
IMS-10020-CVDP-53851524-BEE5-4B4A-A63D-7ED62F4F0A6D		RKI	ncov	Human	B.1.1.7	20I (Alpha, V1)	2021-02-16	Europe	Germany	Bayern	Landkreis Weiden i.d.OPf.	Weiden	92637	49.6768	12.1561		20I (Alpha, V1)	B.1.1.7	false	false	false	false	false	false	false	false	false
IMS-10146-CVDP-93521E21-AB4C-4A59-81E6-20678E6011BC		RKI	ncov	Human	B.1.1.7	20I (Alpha, V1)	2021-02-11	Europe	Germany	Baden-Württemberg	Landkreis Ulm; Stadt	Ulm	89073	48.4015	9.9927		20I (Alpha, V1)	B.1.1.7	false	false	false	false	false	false	false	false	false
IMS-10218-CVDP-FA556349-E122-4A25-877D-88E358C68AEB		RKI	ncov	Human	B.1.1.7	20I (Alpha, V1)	2021-04-01	Europe	Germany	Sachsen-Anhalt	Landkreis Landeshauptstadt Magdeburg	Magdeburg	39104	52.1243	11.6322		20I (Alpha, V1)	B.1.1.7	false	false	false	false	false	false	false	false	false
IMS-10013-CVDP-B28A6A7F-85AB-49F9-8939-8243B40CBD67		RKI	ncov	Human	B.1.1.7	20I (Alpha, V1)	2021-04-16	Europe	Germany	Bayern	Landkreis Augsburg; Stadt	Augsburg	86154	48.3932	10.8814		20I (Alpha, V1)	Q.7	false	false	false	false	false	false	false	false	false
IMS-10150-CVDP-6F9949DB-44BA-4208-BD5F-3D716645F890		RKI	ncov	Human	B.1.1.7	20I (Alpha, V1)	2021-04-29	Europe	Germany	Rheinland-Pfalz	Landkreis Trier; kreisfreie Stadt	Trier	54290	49.7537	6.6393		20I (Alpha, V1)	B.1.1.7	false	false	false	false	false	false	false	false	false
IMS-10020-CVDP-D5913960-45D6-4FE3-9521-C5CEE40D196D		RKI	ncov	Human	B.1.1.7	20I (Alpha, V1)	2021-03-30	Europe	Germany	Rheinland-Pfalz	Landkreis Trier; kreisfreie Stadt	Trier	54290	49.7537	6.6393		20I (Alpha, V1)	B.1.1.7	false	false	false	false	false	false	false	false	false
IMS-10020-CVDP-21135D52-86BF-4A1E-9286-ED6D3425AEE1		RKI	ncov	Human	B.1.1.7	20I (Alpha, V1)	2021-04-09	Europe	Germany	Rheinland-Pfalz	Landkreis Trier; kreisfreie Stadt	Trier	54290	49.7537	6.6393		20I (Alpha, V1)	B.1.1.7	false	false	false	false	false	false	false	false	false
IMS-10020-CVDP-36D5CED9-4550-40C4-8911-60F2C6925BCD		RKI	ncov	Human	B.1.1.7	20I (Alpha, V1)	2021-03-16	Europe	Germany	Baden-Württemberg	Landkreis Esslingen	Leinfelden-Echterdingen	70771	48.6941	9.1681		20I (Alpha, V1)	B.1.1.7	false	false	false	false	false	false	false	false	false
IMS-10587-CVDP-49257528-C2F3-4972-B113-1BDFB60D8CEA		RKI	ncov	Human	B.1.1.7	20I (Alpha, V1)	2021-02-05	Europe	Germany	Hamburg	Landkreis Hamburg; Freie und Hansestadt	Hamburg	20095	53.5722	10.0031		20I (Alpha, V1)	B.1.1.7	false	false	false	false	false	false	false	false	false
IMS-10013-CVDP-4F69E24C-68F8-44C5-BB49-A0A5E0567AA7		RKI	ncov	Human	B.1.1.7	20I (Alpha, V1)	2021-04-15	Europe	Germany	Bremen	Landkreis Bremerhaven; Stadt	Bremerhaven	27580	53.5685	8.5968		20I (Alpha, V1)	B.1.1.7	false	false	false	false	false	false	false	false	false
IMS-10261-CVDP-3313C531-AB1F-487F-905D-4B43EAE0E4B7		RKI	ncov	Human	B.1.1.7	20I (Alpha, V1)	2021-02-24	Europe	Germany	Nordrhein-Westfalen	Landkreis Lippe	Bad Salzuflen	32105	52.0808	8.7505		20I (Alpha, V1)	B.1.1.7	false	false	false	false	false	false	false	false	false
IMS-10117-CVDP-F7F20934-5BB8-423B-95B0-835A89D7F39B		RKI	ncov	Human	B.1.1.7	20I (Alpha, V1)	2021-03-02	Europe	Germany	Baden-Württemberg	Landkreis Rhein-Neckar-Kreis	Eppelheim	69214	49.4019	8.6364		20I (Alpha, V1)	B.1.1.7	false	false	false	false	false	false	false	false	false
IMS-10013-CVDP-BBD1F66F-05AF-484E-B3C0-14C41E4C7E47		RKI	ncov	Human	B.1.1.7	20I (Alpha, V1)	2021-04-16	Europe	Germany	Bayern	Landkreis Augsburg; Stadt	Augsburg	86154	48.3932	10.8814		20I (Alpha, V1)	B.1.1.7	false	false	false	false	false	false	false	false	false
IMS-10117-CVDP-3C3AE364-086F-412D-A5CD-AF888D718FA5		RKI	ncov	Human	B.1.1.7	20I (Alpha, V1)	2021-03-25	Europe	Germany	Baden-Württemberg	Landkreis Karlsruhe	Ettlingen	76275	48.9409	8.4076		20I (Alpha, V1)	Q.7	false	false	false	false	false	false	false	false	false
IMS-10641-CVDP-2C959520-EA9C-44A3-9BF0-311E5009AD94		RKI	ncov	Human	B.1.1.7	20I (Alpha, V1)	2021-03-04	Europe	Germany	Sachsen-Anhalt	Kreisfreie Stadt Halle	Halle	6120	51.5124	11.9055		20I (Alpha, V1)	B.1.1.7	false	false	false	false	false	false	false	false	false
IMS-10117-CVDP-FE9EEFDE-3E60-4F71-82B5-648905A5AC8A		RKI	ncov	Human	B.1.1.7	20I (Alpha, V1)	2021-03-25	Europe	Germany	Nordrhein-Westfalen	Landkreis Leverkusen; Stadt	Leverkusen	51375	51.0331	7.052		20I (Alpha, V1)	B.1.1.7	false	false	false	false	false	false	false	false	false
IMS-10020-CVDP-6D5040AD-E17A-4019-892F-E6973F976C0D		RKI	ncov	Human	B.1.1.7	20I (Alpha, V1)	2021-03-19	Europe	Germany	Rheinland-Pfalz	Landkreis Trier; kreisfreie Stadt	Trier	54290	49.7537	6.6393		20I (Alpha, V1)	B.1.1.7	false	false	false	false	false	false	false	false	false
IMS-10013-CVDP-01872		RKI	ncov	Human	B.1.1.7	20I (Alpha, V1)	2021-02-05	Europe	Germany	Hamburg	Landkreis Hamburg; Freie und Hansestadt	Hamburg	21079	53.5722	10.0031		20I (Alpha, V1)	B.1.1.7	false	false	false	false	false	false	false	false	false
61792019ba758861d782eec9	DN00645_20050557	IIMK	ncov	Human	B.1.1.7	20I (Alpha, V1)	2021-05-20	Europe	Germany	Thuringia	Landkreis Saale-Orla-Kreis	Remptendorf	7368	50.5284	11.6598	1761	20I (Alpha, V1)	B.1.1.7	false	false	false	false	false	false	false	false	false
6166ba5c81e18c1c41ced707	1091272285	IIMK	ncov	Human	B.1.1.7	20I (Alpha, V1)	2021-02-22	Europe	Germany	Thuringia	Landkreis Unstrut-Hainich-Kreis	Rodeberg	99976	51.2479	10.3519	36	20I (Alpha, V1)	B.1.1.7	false	false	false	false	false	false	false	false	false
IMS-10023-CVDP-4E003873-721E-4805-8DC8-5D41608226C0		RKI	ncov	Human	B.1.1.7	20I (Alpha, V1)	2021-03-30	Europe	Germany	Sachsen	Landkreis Erzgebirgskreis	Neukirchen/Erzgebirge	9221	50.7835	12.87		20I (Alpha, V1)	B.1.1.7	true	false	false	false	false	false	false	false	false
IMS-10020-CVDP-6ACE4F90-F6BC-4F9B-A386-CA2CACA6002A		RKI	ncov	Human	B.1.1.7	20I (Alpha, V1)	2021-04-26	Europe	Germany	Baden-Württemberg	Landkreis Esslingen	Leinfelden-Echterdingen	70771	48.6941	9.1681		20I (Alpha, V1)	B.1.1.7	false	false	false	false	false	false	false	false	false
6166ba5b81e18c1c41cec9f9	1050225122	IIMK	ncov	Human	B.1.1.7	20I (Alpha, V1)	2021-05-03	Europe	Germany	Thuringia	Landkreis Gera	Gera	7546	50.8753	12.0788	383	20I (Alpha, V1)	B.1.1.7	false	false	false	false	false	false	false	false	false
IMS-10020-CVDP-2C700AF9-8CE8-438C-997E-C20EC6A94ECD		RKI	ncov	Human	B.1.1.7	20I (Alpha, V1)	2021-03-19	Europe	Germany	Rheinland-Pfalz	Landkreis Trier; kreisfreie Stadt	Trier	54290	49.7537	6.6393		20I (Alpha, V1)	B.1.1.7	false	false	false	false	false	false	false	false	false
IMS-10294-CVDP-314E2653-EF3E-48D2-A0C2-6AB47E4F7CDD		RKI	ncov	Human	B.1.1.7	20I (Alpha, V1)	2021-02-25	Europe	Germany	Nordrhein-Westfalen	Landkreis Düsseldorf; Stadt	Düsseldorf	40477	51.2371	6.7795		20I (Alpha, V1)	B.1.1.7	false	false	false	false	false	false	false	false	false
IMS-10020-CVDP-1CCCFE48-E14C-428D-BA9F-AF055EA97748		RKI	ncov	Human	B.1.1.7	20I (Alpha, V1)	2021-04-08	Europe	Germany	Rheinland-Pfalz	Landkreis Trier; kreisfreie Stadt	Trier	54290	49.7537	6.6393		20I (Alpha, V1)	B.1.1.7	false	false	false	false	false	false	false	false	false
IMS-10020-CVDP-55F455FF-32B9-47FC-9668-30D4BE74E46F		RKI	ncov	Human	B.1.1.7	20I (Alpha, V1)	2021-03-17	Europe	Germany	Baden-Württemberg	Landkreis Esslingen	Leinfelden-Echterdingen	70771	48.6941	9.1681		20I (Alpha, V1)	B.1.1.7	false	false	false	false	false	false	false	false	false
IMS-10087-CVDP-AF76CCD0-33F4-4526-BF97-0A573E736AEA		RKI	ncov	Human	B.1.1.7	20I (Alpha, V1)	2021-03-12	Europe	Germany	Nordrhein-Westfalen	Landkreis Köln; Stadt	Köln	50858	50.9243	6.8565		20I (Alpha, V1)	B.1.1.7	false	false	false	false	false	false	false	false	false
IMS-10116-CVDP-DE7EC82C-92D7-494B-BB4B-CD58CA45CADB		RKI	ncov	Human	B.1.1.7	20I (Alpha, V1)	2021-05-06	Europe	Germany	Sachsen	Kreisfreie Stadt Dresden	Dresden	1067	51.0628	13.7297		20I (Alpha, V1)	B.1.1.7	false	false	false	false	false	false	false	false	false
6166ba5b81e18c1c41ced436	1029350632	IIMK	ncov	Human	B.1.1.7	20I (Alpha, V1)	2021-04-21	Europe	Germany	Thuringia	Landkreis Eichsfeld	Heiligenstadt	37308	51.378	10.1376	694	20I (Alpha, V1)	B.1.1.7	false	false	false	false	false	false	false	false	false
IMS-10197-CVDP-842BE655-2104-418E-AA17-54895D178175		RKI	ncov	Human	B.1.1.7	20I (Alpha, V1)	2021-04-12	Europe	Germany	Sachsen-Anhalt	Landkreis Landeshauptstadt Magdeburg	Magdeburg	39124	52.1638	11.6333		20I (Alpha, V1)	B.1.1.7	false	false	false	false	false	false	false	false	false
IMS-10036-CVDP-0E004F48-8A72-462B-9E3E-9BA8F9F38408		RKI	ncov	Human	B.1.1.7	20I (Alpha, V1)	2021-04-06	Europe	Germany	Bayern	Landkreis München	Planegg	82152	48.1067	11.4248		20I (Alpha, V1)	B.1.1.7	false	false	false	false	false	false	false	false	false
IMS-10150-CVDP-BCC081CC-FC92-4DF9-B0A8-4569985E2E5C		RKI	ncov	Human	B.1.1.7	20I (Alpha, V1)	2021-04-30	Europe	Germany	Nordrhein-Westfalen	Landkreis Leverkusen; Stadt	Leverkusen	51375	51.0331	7.052		20I (Alpha, V1)	B.1.1.7	false	false	false	false	false	false	false	false	false
6166ba5b81e18c1c41ced48c	1024628562	IIMK	ncov	Human	B.1.1.7	20I (Alpha, V1)	2021-04-21	Europe	Germany	Thuringia	Landkreis Gotha	Friedrichroda	99894	50.8575	10.5651	346	20I (Alpha, V1)	B.1.1.7	false	false	false	false	false	false	false	false	false
IMS-10013-CVDP-C0E1B81E-DF89-4EE4-B0AB-02039BED5445		RKI	ncov	Human	B.1.1.7	20I (Alpha, V1)	2021-03-12	Europe	Germany	Hamburg	Landkreis Hamburg; Freie und Hansestadt	Hamburg	21079	53.5722	10.0031		20I (Alpha, V1)	B.1.1.7	false	false	false	false	false	false	false	true	true
IMS-10603-CVDP-6CD2EB25-BD8D-4770-B5F1-4BC6E4B0A344		RKI	ncov	Human	B.1.1.7	20I (Alpha, V1)	2021-04-09	Europe	Germany	Saarland	Landkreis Saarpfalz-Kreis	Homburg	66424	49.3264	7.3387		20I (Alpha, V1)	B.1.1.7	false	false	false	false	false	false	false	false	false
IMS-10087-CVDP-A71C89EB-9805-40D1-9F0C-F217975E3BA4		RKI	ncov	Human	B.1.1.7	20I (Alpha, V1)	2021-03-29	Europe	Germany	Nordrhein-Westfalen	Landkreis Köln; Stadt	Köln	50858	50.9243	6.8565		20I (Alpha, V1)	B.1.1.7	false	false	false	false	false	false	false	false	false
IMS-10203-CVDP-5437CA8E-216F-4955-AB19-9E9978FD4297		RKI	ncov	Human	B.1.1.7	20I (Alpha, V1)	2021-02-20	Europe	Germany	Hamburg	Landkreis Hamburg; Freie und Hansestadt	Hamburg	20095	53.5722	10.0031		20I (Alpha, V1)	B.1.1.7	false	false	false	false	false	false	false	false	false
IMS-10116-CVDP-00072		RKI	ncov	Human	B.1.1.7	20I (Alpha, V1)	2021-01-15	Europe	Germany	Baden-Württemberg	Landkreis Heidelberg	Heidelberg	69126	49.3757	8.6911		20I (Alpha, V1)	B.1.1.7	false	false	false	false	false	false	false	false	false
IMS-10004-CVDP-1D697C6F-E46F-43D7-B088-62AA49CB1874		RKI	ncov	Human	B.1.1.7	20I (Alpha, V1)	2021-04-19	Europe	Germany	Schleswig-Holstein	Kreis Herzogtum Lauenburg	Kreis Herzogtum Lauenburg	21502	53.5966	10.5762		20I (Alpha, V1)	B.1.1.7	false	false	false	false	false	false	false	false	false
IMS-10087-CVDP-F2C5E603-F5A8-4DFF-AD25-F2D38F53E1D8		RKI	ncov	Human	B.1.1.7	20I (Alpha, V1)	2021-03-18	Europe	Germany	Nordrhein-Westfalen	Landkreis Köln; Stadt	Köln	50858	50.9243	6.8565		20I (Alpha, V1)	B.1.1.7	false	false	false	false	false	false	false	false	false
6166b85c81e18c1c41cec6ed	IMS-10013-CVDP-3291566a-93bd-4a8c-aef8-601afab52a76	IIMK	ncov	Human	B.1.1.7	20I (Alpha, V1)	2021-04-01	Europe	Germany	Thuringia	Landkreis Gera	Gera	7549	50.8753	12.0788	8	20I (Alpha, V1)	B.1.1.7	false	false	false	false	false	false	false	false	false
IMS-10117-CVDP-6D155B5C-BF55-4CAD-A195-A4FDEB685EB9		RKI	ncov	Human	B.1.1.7	20I (Alpha, V1)	2021-03-09	Europe	Germany	Baden-Württemberg	Landkreis Karlsruhe	Ettlingen	76275	48.9409	8.4076		20I (Alpha, V1)	B.1.1.7	false	false	false	false	false	false	false	false	false
IMS-10013-CVDP-4ECDBA7A-89EE-4D47-A357-B1743AFE9DD5		RKI	ncov	Human	B.1.1.7	20I (Alpha, V1)	2021-02-16	Europe	Germany	Bayern	Bayreuth; Stadt	Bayreuth	95448	49.9474	11.5993		20I (Alpha, V1)	B.1.1.7	false	false	false	false	false	false	false	false	false
IMS-10013-CVDP-339FB2D7-3EDE-4A37-86C2-52EF74C89DCA		RKI	ncov	Human	B.1.1.7	20I (Alpha, V1)	2021-03-17	Europe	Germany	Bayern	Landkreis Augsburg; Stadt	Augsburg	86154	48.3932	10.8814		20I (Alpha, V1)	B.1.1.7	false	false	false	false	false	false	false	false	false
IMS-10338-CVDP-28012FBC-A204-4294-A037-C32C47892696		RKI	ncov	Human	B.1.1.7	20I (Alpha, V1)	2021-02-26	Europe	Germany	Rheinland-Pfalz	Landkreis Ludwigshafen am Rhein; kreisfreie Stadt	Ludwigshafen am Rhein	67063	49.499	8.4109		20I (Alpha, V1)	B.1.1.7	false	false	false	false	false	false	false	false	false
IMS-10261-CVDP-881034E0-F156-409D-A147-FFEBDDE784EB		RKI	ncov	Human	B.1.1.7	20I (Alpha, V1)	2021-02-12	Europe	Germany	Nordrhein-Westfalen	Landkreis Lippe	Bad Salzuflen	32105	52.0808	8.7505		20I (Alpha, V1)	B.1.1.7	false	false	false	false	false	false	false	false	false
IMS-10020-CVDP-F531BD8E-70C5-40E3-B874-3BA281A37B84		RKI	ncov	Human	B.1.1.7	20I (Alpha, V1)	2021-02-26	Europe	Germany	Bayern	Landkreis Weiden i.d.OPf.	Weiden	92637	49.6768	12.1561		20I (Alpha, V1)	B.1.1.7	false	false	false	false	false	false	false	false	false
IMS-10087-CVDP-B0BC1261-667B-45EF-BCC1-3605E6AD8196		RKI	ncov	Human	B.1.1.7	20I (Alpha, V1)	2021-02-26	Europe	Germany	Nordrhein-Westfalen	Landkreis Köln; Stadt	Köln	50858	50.9243	6.8565		20I (Alpha, V1)	B.1.1.7	false	false	false	false	false	false	false	false	false
6166b85c81e18c1c41cec5f4	IMS-10013-CVDP-b543285a-0cc2-4c6d-8daf-7f1a3437ddad	IIMK	ncov	Human	B.1.1.7	20I (Alpha, V1)	2021-03-08	Europe	Germany	Thuringia	Landkreis Wartburgkreis	Ruhla	99842	50.8918	10.3668	5	20I (Alpha, V1)	B.1.1.7	false	false	true	false	false	false	false	false	true
IMS-10020-CVDP-5A1B1D7B-8695-4DC8-A5D7-583F0CBC0B32		RKI	ncov	Human	B.1.1.7	20I (Alpha, V1)	2021-04-07	Europe	Germany	Bayern	Kreisfreie Stadt München	München	80335	48.1427	11.5552		20I (Alpha, V1)	B.1.1.7	false	false	false	false	false	false	false	false	true
IMS-10013-CVDP-59EEB827-1114-442D-9638-459D420D014A		RKI	ncov	Human	B.1.1.7	20I (Alpha, V1)	2021-03-11	Europe	Germany	Sachsen	Landkreis Nordsachsen	Wermsdorf	4779	51.2833	12.95		20I (Alpha, V1)	B.1.1.7	false	false	false	false	false	false	false	false	false
IMS-10218-CVDP-0C8D2E21-EE8B-459D-977A-0DBB661A80A6		RKI	ncov	Human	B.1.1.7	20I (Alpha, V1)	2021-03-23	Europe	Germany	Sachsen-Anhalt	Landkreis Landeshauptstadt Magdeburg	Magdeburg	39104	52.1243	11.6322		20I (Alpha, V1)	B.1.1.7	false	false	false	false	false	false	false	false	false
IMS-10594-CVDP-486CC709-116F-442F-8371-B882D3110A52		RKI	ncov	Human	B.1.1.7	20I (Alpha, V1)	2021-04-14	Europe	Germany	Nordrhein-Westfalen	Landkreis Münster; Stadt	Münster	48153	51.9268	7.6313		20I (Alpha, V1)	B.1.1.7	false	false	false	false	false	false	false	false	false
IMS-10213-CVDP-0BCD5229-0C1C-46B6-B7F8-3F4D353196C2		RKI	ncov	Human	B.1.1.7	20I (Alpha, V1)	2021-03-08	Europe	Germany	Sachsen	Kreisfreie Stadt Dresden	Dresden	1307	51.05	13.75		20I (Alpha, V1)	B.1.1.7	false	false	false	false	false	false	false	false	false
IMS-10020-CVDP-92B6E7BD-D44D-4ECD-B789-404F774C4188		RKI	ncov	Human	B.1.1.7	20I (Alpha, V1)	2021-03-18	Europe	Germany	Baden-Württemberg	Landkreis Esslingen	Leinfelden-Echterdingen	70771	48.6941	9.1681		20I (Alpha, V1)	B.1.1.7	false	false	false	false	false	false	false	false	false
IMS-10023-CVDP-98AC69A0-98BB-43C7-AFF6-E30BE766254A		RKI	ncov	Human	B.1.1.7	20I (Alpha, V1)	2021-04-15	Europe	Germany	Sachsen	Landkreis Erzgebirgskreis	Neukirchen/Erzgebirge	9221	50.7835	12.87		20I (Alpha, V1)	B.1.1.7	false	false	false	false	false	false	false	false	false
IMS-10375-CVDP-501959BE-B322-42BF-BF39-9EA9CEE9CC92		RKI	ncov	Human	B.1.1.7	20I (Alpha, V1)	2021-04-09	Europe	Germany	Baden-Württemberg	Landkreis Mannheim	Mannheim	68167	49.4996	8.4939		20I (Alpha, V1)	B.1.1.7	false	false	false	false	false	false	false	false	false
IMS-10020-CVDP-3AFD3127-A2D5-47F8-996A-BC065261D352		RKI	ncov	Human	B.1.1.7	20I (Alpha, V1)	2021-04-15	Europe	Germany	Rheinland-Pfalz	Landkreis Trier; kreisfreie Stadt	Trier	54290	49.7537	6.6393		20I (Alpha, V1)	B.1.1.7	false	false	false	false	false	false	false	true	false
IMS-10020-CVDP-464F2B6D-FA72-4F01-A3F7-F52042F5BBDA		RKI	ncov	Human	B.1.1.7	20I (Alpha, V1)	2021-03-15	Europe	Germany	Baden-Württemberg	Landkreis Esslingen	Leinfelden-Echterdingen	70771	48.6941	9.1681		20I (Alpha, V1)	B.1.1.7	false	false	false	false	false	false	false	false	false
IMS-10013-CVDP-201F25AB-A378-4CBF-8F58-608F45255099		RKI	ncov	Human	B.1.1.7	20I (Alpha, V1)	2021-02-19	Europe	Germany	Sachsen	Landkreis Nordsachsen	Wermsdorf	4779	51.2833	12.95		20I (Alpha, V1)	B.1.1.7	false	false	false	false	false	false	false	false	false
IMS-10020-CVDP-086F03B6-EB99-4DCB-947A-E1BF81999AB5		RKI	ncov	Human	B.1.1.7	20I (Alpha, V1)	2021-04-19	Europe	Germany	Baden-Württemberg	Landkreis Esslingen	Leinfelden-Echterdingen	70771	48.6941	9.1681		20I (Alpha, V1)	B.1.1.7	false	false	false	false	false	false	false	false	false
IMS-10173-CVDP-00071		RKI	ncov	Human	B.1.1.7	20I (Alpha, V1)	2021-02-03	Europe	Germany	Nordrhein-Westfalen	Landkreis Minden-Lübbecke	Bad Oeynhausen	32545	52.1917	8.8093		20I (Alpha, V1)	B.1.1.7	false	false	false	false	false	false	false	false	false
IMS-10023-CVDP-805A8EE3-0DC6-4576-B7E0-C6116677216D		RKI	ncov	Human	B.1.1.7	20I (Alpha, V1)	2021-03-25	Europe	Germany	Sachsen	Landkreis Erzgebirgskreis	Neukirchen/Erzgebirge	9221	50.7835	12.87		20I (Alpha, V1)	B.1.1.7	false	false	false	false	false	false	false	false	false
6166ba5b81e18c1c41cec9e6	1024621315	IIMK	ncov	Human	B.1.1.7	20I (Alpha, V1)	2021-05-03	Europe	Germany	Thuringia	Landkreis Gotha	Gotha	99867	50.9461	10.6962	272	20I (Alpha, V1)	B.1.1.7	false	false	false	false	false	false	false	false	true
IMS-10594-CVDP-788631E7-D5E5-4715-BEAB-1035A63E41EA		RKI	ncov	Human	B.1.1.7	20I (Alpha, V1)	2021-04-01	Europe	Germany	Nordrhein-Westfalen	Landkreis Münster; Stadt	Münster	48153	51.9268	7.6313		20I (Alpha, V1)	B.1.1.7	false	false	false	false	false	false	false	false	false
IMS-10117-CVDP-59A63930-A536-4A64-A0D8-B53985D47497		RKI	ncov	Human	B.1.1.7	20I (Alpha, V1)	2021-04-09	Europe	Germany	Baden-Württemberg	Landkreis Rhein-Neckar-Kreis	Eppelheim	69214	49.4019	8.6364		20I (Alpha, V1)	B.1.1.7	false	false	false	false	false	false	false	false	false
IMS-10020-CVDP-A45DD02A-6E2C-489A-B4B8-5D0BC70AD1AF		RKI	ncov	Human	B.1.1.7	20I (Alpha, V1)	2021-04-26	Europe	Germany	Baden-Württemberg	Landkreis Esslingen	Leinfelden-Echterdingen	70771	48.6941	9.1681		20I (Alpha, V1)	B.1.1.7	false	false	false	false	false	false	false	false	false
IMS-10215-CVDP-67A41976-0052-4D3B-BA73-84E210A1798E		RKI	ncov	Human	B.1.1.7	20I (Alpha, V1)	2021-04-02	Europe	Germany	Sachsen	Kreisfreie Stadt Leipzig	Leipzig	4103	51.3405	12.3827		20I (Alpha, V1)	B.1.1.7	false	false	false	false	false	false	false	false	false
IMS-10004-CVDP-12895C81-2D02-4EDE-AE34-4120AC922E8C		RKI	ncov	Human	B.1.1.7	20I (Alpha, V1)	2021-01-27	Europe	Germany	Schleswig-Holstein	Kreis Herzogtum Lauenburg	Kreis Herzogtum Lauenburg	21502	53.5966	10.5762		20I (Alpha, V1)	B.1.1.7	false	false	false	false	false	false	false	false	false
IMS-10087-CVDP-977E1A37-F360-45B1-87EF-E166B9FC9615		RKI	ncov	Human	B.1.1.7	20I (Alpha, V1)	2021-04-23	Europe	Germany	Nordrhein-Westfalen	Landkreis Köln; Stadt	Köln	50858	50.9243	6.8565		20I (Alpha, V1)	B.1.1.7	false	false	false	false	false	false	false	false	false
IMS-10020-CVDP-17AB7C61-5464-4202-87B8-6F6142E6F96F		RKI	ncov	Human	B.1.1.7	20I (Alpha, V1)	2021-02-18	Europe	Germany	Berlin	Landkreis Berlin; Stadt	Berlin	10829	52.4761	13.3607		20I (Alpha, V1)	B.1.1.7	false	false	false	false	false	false	false	false	false
IMS-10020-CVDP-CE8E57F8-60C2-46E7-A04A-AB9E19243A1D		RKI	ncov	Human	B.1.1.7	20I (Alpha, V1)	2021-03-08	Europe	Germany	Baden-Württemberg	Landkreis Esslingen	Leinfelden-Echterdingen	70771	48.6941	9.1681		20I (Alpha, V1)	B.1.1.7	false	false	false	false	false	false	false	false	false
IMS-10257-CVDP-12EEA5CE-FCB3-4820-BD16-F68A309DBF44		RKI	ncov	Human	B.1.1.7	20I (Alpha, V1)	2021-04-14	Europe	Germany	Hessen	Landkreis Frankfurt am Main; Stadt	Frankfurt am Main	65926	50.096	8.7111		20I (Alpha, V1)	B.1.1.7	false	false	false	false	false	false	false	false	false
IMS-10020-CVDP-00E46535-CF7D-4936-B36F-37736910D6AD		RKI	ncov	Human	B.1.1.7	20I (Alpha, V1)	2021-03-30	Europe	Germany	Rheinland-Pfalz	Landkreis Trier; kreisfreie Stadt	Trier	54290	49.7537	6.6393		20I (Alpha, V1)	B.1.1.7	false	false	false	false	false	false	false	false	false
IMS-10036-CVDP-4D2C8B8C-8EDD-4DDB-A10C-FD3D21C400BF		RKI	ncov	Human	B.1.1.7	20I (Alpha, V1)	2021-04-13	Europe	Germany	Bayern	Landkreis München	Planegg	82152	48.1067	11.4248		20I (Alpha, V1)	B.1.1.7	false	false	false	false	false	false	false	false	false
6166ba5c81e18c1c41cedaa7	2010751610	IIMK	ncov	Human	B.1.1.7	20I (Alpha, V1)	2021-03-15	Europe	Germany	Thuringia	Landkreis Altenburger Land	Altenburg	4600	50.9851	12.4332	145	20I (Alpha, V1)	B.1.1.7	false	false	false	false	false	false	false	false	false
IMS-10013-CVDP-ED4284FE-CC4B-4CDD-853D-A5DAD7984E85		RKI	ncov	Human	B.1.1.7	20I (Alpha, V1)	2021-04-06	Europe	Germany	Sachsen	Landkreis Nordsachsen	Wermsdorf	4779	51.2833	12.95		20I (Alpha, V1)	B.1.1.7	false	false	false	false	false	false	false	false	false
6166ba5c81e18c1c41ced786	1028310308	IIMK	ncov	Human	B.1.1.7	20I (Alpha, V1)	2021-02-25	Europe	Germany	Thuringia	Landkreis Ilm-Kreis	Arnstadt	99310	50.8343	10.9456	58	20I (Alpha, V1)	B.1.1.7	false	false	false	false	false	false	false	false	false
IMS-10203-CVDP-00073		RKI	ncov	Human	B.1.1.7	20I (Alpha, V1)	2021-02-05	Europe	Germany	Hamburg	Landkreis Hamburg; Freie und Hansestadt	Hamburg	20095	53.5722	10.0031		20I (Alpha, V1)	B.1.1.7	false	false	false	false	false	false	false	false	false
IMS-10020-CVDP-CF886193-244A-4310-986F-221247E14F30		RKI	ncov	Human	B.1.1.7	20I (Alpha, V1)	2021-03-26	Europe	Germany	Rheinland-Pfalz	Landkreis Trier; kreisfreie Stadt	Trier	54290	49.7537	6.6393		20I (Alpha, V1)	B.1.1.7	false	false	false	false	false	false	false	false	false
IMS-10117-CVDP-37643222-C6CC-4E22-8495-323224B26B84		RKI	ncov	Human	B.1.1.7	20I (Alpha, V1)	2021-03-16	Europe	Germany	Baden-Württemberg	Landkreis Karlsruhe	Ettlingen	76275	48.9409	8.4076		20I (Alpha, V1)	B.1.1.7	false	false	false	false	false	false	false	false	false
IMS-10023-CVDP-2E0908F8-BCD9-4320-B32C-DFC7FCB8A8B1		RKI	ncov	Human	B.1.1.7	20I (Alpha, V1)	2021-03-24	Europe	Germany	Sachsen	Landkreis Erzgebirgskreis	Neukirchen/Erzgebirge	9221	50.7835	12.87		20I (Alpha, V1)	B.1.1.7	false	false	false	false	false	false	false	false	false
IMS-10023-CVDP-F01406F7-3E52-4554-9159-232B8E7F4FB4		RKI	ncov	Human	B.1.1.7	20I (Alpha, V1)	2021-04-24	Europe	Germany	Sachsen	Landkreis Erzgebirgskreis	Neukirchen/Erzgebirge	9221	50.7835	12.87		20I (Alpha, V1)	B.1.1.7	false	false	false	false	false	false	false	false	false
6166ba5c81e18c1c41ced76a	1091275662	IIMK	ncov	Human	B.1.1.7	20I (Alpha, V1)	2021-02-24	Europe	Germany	Thuringia	Landkreis Unstrut-Hainich-Kreis	Mühlhausen	99974	51.2088	10.459	74	20I (Alpha, V1)	B.1.1.7	false	false	false	false	false	false	false	false	false
IMS-10641-CVDP-FB5C7D3A-CD53-4A11-9B24-8A9A836B8ACF		RKI	ncov	Human	B.1.1.7	20I (Alpha, V1)	2021-02-20	Europe	Germany	Sachsen-Anhalt	Kreisfreie Stadt Halle	Halle	6120	51.5124	11.9055		20I (Alpha, V1)	B.1.1.7	false	false	false	false	false	false	false	false	false
IMS-10020-CVDP-362359E3-55E0-4107-B976-206363BFA9B5		RKI	ncov	Human	B.1.1.7	20I (Alpha, V1)	2021-02-15	Europe	Germany	Bayern	Landkreis Weiden i.d.OPf.	Weiden	92637	49.6768	12.1561		20I (Alpha, V1)	B.1.1.7	false	false	false	false	false	false	false	false	false
IMS-10261-CVDP-7D86011E-AD42-4D03-8193-DC369BD28E80		RKI	ncov	Human	B.1.1.7	20I (Alpha, V1)	2021-04-07	Europe	Germany	Nordrhein-Westfalen	Landkreis Lippe	Bad Salzuflen	32105	52.0808	8.7505		20I (Alpha, V1)	B.1.1.7	false	false	false	false	false	false	false	false	false
IMS-10117-CVDP-FD6970D6-2076-4FF3-A69C-4F3748F848A9		RKI	ncov	Human	B.1.1.7	20I (Alpha, V1)	2021-02-26	Europe	Germany	Rheinland-Pfalz	Landkreis Neustadt an der Weinstraße; kreisfreie Stadt	Neustadt an der Weinstraße	67433	49.3465	8.1491		20I (Alpha, V1)	B.1.1.7	false	false	false	false	false	false	false	false	false
IMS-10023-CVDP-EC434A1A-9752-4B50-B2CC-D492F03C82C2		RKI	ncov	Human	B.1.1.7	20I (Alpha, V1)	2021-03-22	Europe	Germany	Sachsen	Landkreis Erzgebirgskreis	Neukirchen/Erzgebirge	9221	50.7835	12.87		20I (Alpha, V1)	B.1.1.7	false	false	false	false	false	false	false	true	false
IMS-10383-CVDP-897BA203-E5AA-449F-9B78-6E2CB46FC2B0		RKI	ncov	Human	B.1.1.7	20I (Alpha, V1)	2021-03-09	Europe	Germany	Bayern	Passau; Stadt	Passau	94034	48.589	13.3971		20I (Alpha, V1)	B.1.1.7	false	false	false	false	false	false	false	false	false
IMS-10117-CVDP-2DD4CE77-18C8-4B51-9C6A-BF9808ECF4D8		RKI	ncov	Human	B.1.1.7	20I (Alpha, V1)	2021-03-18	Europe	Germany	Nordrhein-Westfalen	Landkreis Bonn; Stadt	Bonn	53115	50.7272	7.0851		20I (Alpha, V1)	B.1.1.7	false	false	false	false	false	false	false	false	false
IMS-10122-CVDP-2A141D64-9BFC-471C-9E45-24E2D7DB0C9F		RKI	ncov	Human	B.1.1.7	20I (Alpha, V1)	2021-02-18	Europe	Germany	Baden-Württemberg	Landkreis Karlsruhe	Karlsruhe	76131	49.0078	8.4199		20I (Alpha, V1)	B.1.1.7	false	false	false	false	false	false	false	false	false
60a37c9d292136361c620496	DN00206_22020894	IIMK	ncov	Human	B.1.1.7	20I (Alpha, V1)	2021-02-22	Europe	Germany	Thuringia	Landkreis Saale-Orla-Kreis	Saalburg-Ebersdorf	7929	50.5022	11.7325	189	20I (Alpha, V1)	B.1.1.7	false	false	false	false	false	false	false	false	false
IMS-10122-CVDP-17D591D7-B065-4F02-B09F-03FE1F583210		RKI	ncov	Human	B.1.1.7	20I (Alpha, V1)	2021-03-30	Europe	Germany	Sachsen	Kreisfreie Stadt Leipzig	Leipzig	4289	51.3667	12.3833		20I (Alpha, V1)	B.1.1.7	false	false	false	false	false	false	false	false	false
IMS-10061-CVDP-D858AD51-A5DB-443E-B49A-2CE554EFE905		RKI	ncov	Human	B.1.1.7	20I (Alpha, V1)	2021-03-15	Europe	Germany	Niedersachsen	Landkreis Hameln-Pyrmont	Hameln	31785	52.1037	9.3676		20I (Alpha, V1)	B.1.1.7	false	false	false	false	false	false	false	false	false
IMS-10295-CVDP-546F795D-76B5-435E-B213-D67D1AF30C19		RKI	ncov	Human	B.1.1.7	20I (Alpha, V1)	2021-02-04	Europe	Germany	Niedersachsen	Landkreis Region Hannover	Hannover	30623	52.3795	9.8075		20I (Alpha, V1)	B.1.1.7	false	false	false	false	false	false	false	false	false
IMS-10061-CVDP-894F352E-F655-4C3F-ABD3-C4892FBCDB3B		RKI	ncov	Human	B.1.1.7	20I (Alpha, V1)	2021-04-04	Europe	Germany	Sachsen-Anhalt	Kreisfreie Stadt Halle	Halle	6112	51.4753	11.9973		20I (Alpha, V1)	B.1.1.7	false	false	false	false	false	false	false	false	false
IMS-10013-CVDP-108E1916-4932-40E9-9666-071132326BC8		RKI	ncov	Human	B.1.1.7	20I (Alpha, V1)	2021-04-08	Europe	Germany	Sachsen	Landkreis Nordsachsen	Wermsdorf	4779	51.2833	12.95		20I (Alpha, V1)	B.1.1.7	false	false	false	false	false	false	false	false	false
IMS-10338-CVDP-CEFB8A64-04C9-4333-B7A8-B1E2353E4B28		RKI	ncov	Human	B.1.1.7	20I (Alpha, V1)	2021-02-21	Europe	Germany	Rheinland-Pfalz	Landkreis Ludwigshafen am Rhein; kreisfreie Stadt	Ludwigshafen am Rhein	67063	49.499	8.4109		20I (Alpha, V1)	B.1.1.7	false	false	false	false	false	false	false	false	false
IMS-10004-CVDP-6628AC08-A52A-4B02-B2B2-7A85DD4C0FE8		RKI	ncov	Human	B.1.1.7	20I (Alpha, V1)	2021-04-09	Europe	Germany	Schleswig-Holstein	Kreis Herzogtum Lauenburg	Kreis Herzogtum Lauenburg	21502	53.5966	10.5762		20I (Alpha, V1)	B.1.1.7	false	false	false	false	false	false	false	false	false
IMS-10020-CVDP-7460526E-D02D-4C98-9B50-19CF0077C541		RKI	ncov	Human	B.1.1.7	20I (Alpha, V1)	2021-03-04	Europe	Germany	Baden-Württemberg	Landkreis Esslingen	Leinfelden-Echterdingen	70771	48.6941	9.1681		20I (Alpha, V1)	B.1.1.7	false	false	false	false	false	false	false	false	false
IMS-10218-CVDP-C31786B1-8213-4560-B67B-3D6BD17F4F5A		RKI	ncov	Human	B.1.1.7	20I (Alpha, V1)	2021-03-26	Europe	Germany	Sachsen-Anhalt	Landkreis Landeshauptstadt Magdeburg	Magdeburg	39104	52.1243	11.6322		20I (Alpha, V1)	B.1.1.7	false	false	false	false	false	false	false	false	false
6166ba5c81e18c1c41cedcbf	1028312559	IIMK	ncov	Human	B.1.1.7	20I (Alpha, V1)	2021-03-21	Europe	Germany	Thuringia	Landkreis Ilm-Kreis	Arnstadt	99310	50.8343	10.9456	27	20I (Alpha, V1)	B.1.1.7	false	false	false	false	false	false	false	false	false
IMS-10087-CVDP-5FFA0E65-2656-4C1C-BD30-44B19C4A2D45		RKI	ncov	Human	B.1.1.7	20I (Alpha, V1)	2021-03-30	Europe	Germany	Nordrhein-Westfalen	Landkreis Köln; Stadt	Köln	50858	50.9243	6.8565		20I (Alpha, V1)	B.1.1.7	false	false	false	false	false	false	false	false	false
IMS-10122-CVDP-5627B2F6-3BB3-437C-98CF-BB62D71AC79C		RKI	ncov	Human	B.1.1.7	20I (Alpha, V1)	2021-04-23	Europe	Germany	Baden-Württemberg	Landkreis Karlsruhe	Karlsruhe	76131	49.0078	8.4199		20I (Alpha, V1)	B.1.1.7	false	false	false	false	false	false	false	false	false
IMS-10122-CVDP-813		RKI	ncov	Human	B.1.1.7	20I (Alpha, V1)	2021-02-02	Europe	Germany	Baden-Württemberg	Landkreis Karlsruhe	Karlsruhe	76131	49.0078	8.4199		20I (Alpha, V1)	B.1.1.7	false	false	false	false	false	false	false	false	false
IMS-10116-CVDP-7D7DB377-C1E2-4421-874C-799FC4F72FD0		RKI	ncov	Human	B.1.1.7	20I (Alpha, V1)	2021-04-22	Europe	Germany	Sachsen	Kreisfreie Stadt Dresden	Dresden	1067	51.0628	13.7297		20I (Alpha, V1)	B.1.1.7	false	false	false	false	false	false	false	false	false
IMS-10082-CVDP-2F668D74-E243-4690-BB27-C9A4780BA125		RKI	ncov	Human	B.1.1.7	20I (Alpha, V1)	2021-05-10	Europe	Germany	Nordrhein-Westfalen	Landkreis Bochum; Stadt	Bochum	44879	51.4271	7.1543		20I (Alpha, V1)	B.1.1.7	false	false	false	false	false	false	false	false	false
IMS-10013-CVDP-EC1F9131-3283-4A59-B274-C4BA7E413E67		RKI	ncov	Human	B.1.1.7	20I (Alpha, V1)	2021-04-16	Europe	Germany	Bremen	Kreisfreie Stadt Bremen	Bremen	28357	53.1178	8.8947		20I (Alpha, V1)	B.1.1.7	false	false	false	false	false	false	false	false	false
IMS-10020-CVDP-0ED679B9-AC3E-4AF4-9B5B-CCB6D7F740A8		RKI	ncov	Human	B.1.1.7	20I (Alpha, V1)	2021-04-10	Europe	Germany	Nordrhein-Westfalen	Landkreis Leverkusen; Stadt	Leverkusen	51375	51.0331	7.052		20I (Alpha, V1)	B.1.1.7	false	false	false	false	false	false	false	false	false
IMS-10020-CVDP-FE96E1DC-3CAD-42B8-A299-243E08E95A65		RKI	ncov	Human	B.1.1.7	20I (Alpha, V1)	2021-03-29	Europe	Germany	Berlin	Landkreis Berlin; Stadt	Berlin	10829	52.4761	13.3607		20I (Alpha, V1)	B.1.1.7	false	false	false	false	false	false	false	false	false
6166ba5c81e18c1c41cedc20	1091300605	IIMK	ncov	Human	B.1.1.7	20I (Alpha, V1)	2021-03-18	Europe	Germany	Thuringia	Landkreis Eichsfeld	Worbis	37339	51.4188	10.3625	121	20I (Alpha, V1)	B.1.1.7	false	false	false	false	false	false	false	false	false
IMS-10173-CVDP-4D11CBC8-7BC9-4DE8-88BE-4B66F67D2CE2		RKI	ncov	Human	B.1.1.7	20I (Alpha, V1)	2021-05-03	Europe	Germany	Nordrhein-Westfalen	Landkreis Minden-Lübbecke	Bad Oeynhausen	32545	52.1917	8.8093		20I (Alpha, V1)	B.1.1.7	false	false	false	false	false	false	false	false	false
IMS-10146-CVDP-C97FDB5A-1320-4DEA-94A2-EE21930AC855		RKI	ncov	Human	B.1.1.7	20I (Alpha, V1)	2021-04-19	Europe	Germany	Baden-Württemberg	Landkreis Ulm; Stadt	Ulm	89073	48.4015	9.9927		20I (Alpha, V1)	B.1.1.7	false	false	false	false	false	false	false	false	false
IMS-10272-CVDP-E9A680FD-EA19-45E6-AE30-3A417C9526D9		RKI	ncov	Human	B.1.1.7	20I (Alpha, V1)	2021-04-08	Europe	Germany	Bayern	Landkreis München	Oberschleißheim	85764	48.25	11.5667		20I (Alpha, V1)	B.1.1.7	false	false	false	false	false	false	false	false	false
IMS-10117-CVDP-D092244F-C7F1-4CA0-B51D-ED35041ECE57		RKI	ncov	Human	B.1.1.7	20I (Alpha, V1)	2021-04-19	Europe	Germany	Baden-Württemberg	Landkreis Rhein-Neckar-Kreis	Eppelheim	69214	49.4019	8.6364		20I (Alpha, V1)	B.1.1.7	false	false	false	false	false	false	false	false	false
IMS-10013-CVDP-16DDA8D1-7D4B-4EA3-BC61-793582FDCE38		RKI	ncov	Human	B.1.1.7	20I (Alpha, V1)	2021-02-17	Europe	Germany	Hamburg	Landkreis Hamburg; Freie und Hansestadt	Hamburg	22453	53.5722	10.0031		20I (Alpha, V1)	B.1.1.7	false	false	false	false	false	false	false	false	false
IMS-10375-CVDP-C8AA6F8C-8011-482D-8E38-F23DDCD6C717		RKI	ncov	Human	B.1.1.7	20I (Alpha, V1)	2021-04-27	Europe	Germany	Baden-Württemberg	Landkreis Heidelberg	Heidelberg	69120	49.4169	8.6764		20I (Alpha, V1)	B.1.1.7	false	false	false	false	false	false	false	false	false
IMS-10020-CVDP-09DE3BDC-BC63-40BB-9312-C8A814784BC1		RKI	ncov	Human	B.1.1.7	20I (Alpha, V1)	2021-03-19	Europe	Germany	Rheinland-Pfalz	Landkreis Trier; kreisfreie Stadt	Trier	54290	49.7537	6.6393		20I (Alpha, V1)	B.1.1.7	false	false	false	false	false	false	false	false	false
IMS-10117-CVDP-82A2AB2A-7257-4937-A4BB-E398752FA2DC		RKI	ncov	Human	B.1.1.7	20I (Alpha, V1)	2021-03-29	Europe	Germany	Baden-Württemberg	Landkreis Rhein-Neckar-Kreis	Eppelheim	69214	49.4019	8.6364		20I (Alpha, V1)	B.1.1.7	false	false	false	false	false	false	false	false	false
IMS-10117-CVDP-88A2CD7C-AA18-4826-85F1-28484C8B2588		RKI	ncov	Human	B.1.1.7	20I (Alpha, V1)	2021-03-31	Europe	Germany	Baden-Württemberg	Landkreis Karlsruhe	Ettlingen	76275	48.9409	8.4076		20I (Alpha, V1)	B.1.1.7	false	false	false	false	false	false	false	false	false
IMS-10020-CVDP-BA0F2E9B-C2CC-4D09-BF95-76112CBE887E		RKI	ncov	Human	B.1.1.7	20I (Alpha, V1)	2021-04-03	Europe	Germany	Baden-Württemberg	Landkreis Esslingen	Leinfelden-Echterdingen	70771	48.6941	9.1681		20I (Alpha, V1)	B.1.1.7	false	false	false	false	false	false	false	false	false
IMS-10565-CVDP-0F9C11DB-AA4C-490E-90D2-939F5B8C2BBA		RKI	ncov	Human	B.1.1.7	20I (Alpha, V1)	2021-02-24	Europe	Germany	Schleswig-Holstein	Landkreis Lübeck; Hansestadt	Lübeck	23538	53.8696	10.6871		20I (Alpha, V1)	B.1.1.7	false	false	false	false	false	false	false	false	false
IMS-10117-CVDP-0D66AE65-8CD0-42BD-B62E-304C09ED6524		RKI	ncov	Human	B.1.1.7	20I (Alpha, V1)	2021-03-25	Europe	Germany	Baden-Württemberg	Landkreis Karlsruhe	Ettlingen	76275	48.9409	8.4076		20I (Alpha, V1)	Q.7	false	false	false	false	false	false	false	false	false
IMS-10122-CVDP-31F56E4E-7C9D-401B-A848-8A5177D72CDD		RKI	ncov	Human	B.1.1.7	20I (Alpha, V1)	2021-04-22	Europe	Germany	Baden-Württemberg	Landkreis Karlsruhe	Karlsruhe	76131	49.0078	8.4199		20I (Alpha, V1)	B.1.1.7	false	false	false	false	false	false	false	false	false
IMS-10020-CVDP-8D6D0D31-0DDD-4579-BFD1-A0D757B24AE1		RKI	ncov	Human	B.1.1.7	20I (Alpha, V1)	2021-02-10	Europe	Germany	Rheinland-Pfalz	Landkreis Trier; kreisfreie Stadt	Trier	54290	49.7537	6.6393		20I (Alpha, V1)	B.1.1.7	false	false	false	false	false	false	false	false	false
IMS-10150-CVDP-83A03BF1-1D90-4F83-9953-C5A0DA1BE311		RKI	ncov	Human	B.1.1.7	20I (Alpha, V1)	2021-05-01	Europe	Germany	Nordrhein-Westfalen	Landkreis Leverkusen; Stadt	Leverkusen	51375	51.0331	7.052		20I (Alpha, V1)	B.1.1.7	false	false	false	false	false	false	false	false	false
IMS-10013-CVDP-2FBE8382-648D-4D77-ACD4-565372B49741		RKI	ncov	Human	B.1.1.7	20I (Alpha, V1)	2021-05-03	Europe	Germany	Bremen	Landkreis Bremerhaven; Stadt	Bremerhaven	27580	53.5685	8.5968		20I (Alpha, V1)	B.1.1.7	false	false	false	false	false	false	false	false	false
IMS-10020-CVDP-24A8376B-2908-4045-A11A-FB02DE008BBD		RKI	ncov	Human	B.1.1.7	20I (Alpha, V1)	2021-03-18	Europe	Germany	Rheinland-Pfalz	Landkreis Trier; kreisfreie Stadt	Trier	54290	49.7537	6.6393		20I (Alpha, V1)	B.1.1.7	false	false	false	false	false	false	false	false	false
IMS-10656-CVDP-1CF9AE6E-EAA3-4F3F-BEA9-E54FB5CCF037		RKI	ncov	Human	B.1.1.7	20I (Alpha, V1)	2021-03-22	Europe	Germany	Sachsen	Kreisfreie Stadt Leipzig	Leipzig	4103	51.3405	12.3827		20I (Alpha, V1)	B.1.1.7	false	false	false	false	false	false	false	false	false
IMS-10257-CVDP-EB0527E1-62C2-488F-A52A-C3403BA9939F		RKI	ncov	Human	B.1.1.7	20I (Alpha, V1)	2021-04-10	Europe	Germany	Hessen	Landkreis Frankfurt am Main; Stadt	Frankfurt am Main	65926	50.096	8.7111		20I (Alpha, V1)	B.1.1.7	false	false	false	false	false	false	false	false	false
6166ba5b81e18c1c41ceca19	1011328739	IIMK	ncov	Human	B.1.1.7	20I (Alpha, V1)	2021-05-03	Europe	Germany	Thuringia	Landkreis Greiz	Brahmenau	7554	50.9222	12.16	934	20I (Alpha, V1)	B.1.1.7	false	false	false	false	false	false	false	false	false
IMS-10020-CVDP-3861B6F4-9934-4A12-BD94-B00B401AB96B		RKI	ncov	Human	B.1.1.7	20I (Alpha, V1)	2021-04-22	Europe	Germany	Berlin	Landkreis Berlin; Stadt	Berlin	10829	52.4761	13.3607		20I (Alpha, V1)	B.1.1.7	false	false	false	false	false	false	false	false	false
IMS-10013-CVDP-F7E7973D-DEC8-4F74-83B0-4436BC226A17		RKI	ncov	Human	B.1.1.7	20I (Alpha, V1)	2021-04-10	Europe	Germany	Bremen	Landkreis Bremerhaven; Stadt	Bremerhaven	27580	53.5685	8.5968		20I (Alpha, V1)	B.1.1.7	false	false	false	false	false	false	false	false	false
IMS-10020-CVDP-0210F55A-863F-44DD-8DD3-F40283D72CF9		RKI	ncov	Human	B.1.1.7	20I (Alpha, V1)	2021-03-15	Europe	Germany	Berlin	Landkreis Berlin; Stadt	Berlin	10829	52.4761	13.3607		20I (Alpha, V1)	B.1.1.7	false	false	false	false	false	false	false	false	false
IMS-10020-CVDP-F6896595-1E92-4AE9-BA48-63D6811D9377		RKI	ncov	Human	B.1.1.7	20I (Alpha, V1)	2021-04-07	Europe	Germany	Baden-Württemberg	Landkreis Esslingen	Leinfelden-Echterdingen	70771	48.6941	9.1681		20I (Alpha, V1)	B.1.1.7	false	false	false	false	false	false	false	false	false
6166ba5c81e18c1c41cede62	1091307298	IIMK	ncov	Human	B.1.1.7	20I (Alpha, V1)	2021-03-25	Europe	Germany	Thuringia	Landkreis Saale-Holzland-Kreis	Kahla	7768	50.802	11.5882	190	20I (Alpha, V1)	B.1.1.7	false	false	false	false	false	false	false	false	false
IMS-10020-CVDP-7EC1C045-1D7E-443F-A41C-9AD81C977432		RKI	ncov	Human	B.1.1.7	20I (Alpha, V1)	2021-02-11	Europe	Germany	Bayern	Landkreis Weiden i.d.OPf.	Weiden	92637	49.6768	12.1561		20I (Alpha, V1)	B.1.1.7	false	false	false	false	false	false	false	false	false
IMS-10036-CVDP-C2EDEDA7-8210-4DCD-8119-98CFE8D77DE4		RKI	ncov	Human	B.1.1.7	20I (Alpha, V1)	2021-03-24	Europe	Germany	Bayern	Landkreis München	Planegg	82152	48.1067	11.4248		20I (Alpha, V1)	B.1.1.7	false	false	false	false	false	false	false	false	false
IMS-10020-CVDP-DDC2DE8A-5188-4814-80E4-A497BB4C63D6		RKI	ncov	Human	B.1.1.7	20I (Alpha, V1)	2021-04-18	Europe	Germany	Baden-Württemberg	Landkreis Esslingen	Leinfelden-Echterdingen	70771	48.6941	9.1681		20I (Alpha, V1)	B.1.1.7	false	false	false	false	false	false	false	false	false
IMS-10061-CVDP-52652452-F231-4C0E-AD3B-61A2D227DBD7		RKI	ncov	Human	B.1.1.7	20I (Alpha, V1)	2021-02-25	Europe	Germany	Sachsen-Anhalt	Kreisfreie Stadt Halle	Halle	6112	51.4753	11.9973		20I (Alpha, V1)	B.1.1.7	false	false	false	false	false	false	false	false	false
6166ba5c81e18c1c41cedb8d	1002047228	IIMK	ncov	Human	B.1.1.7	20I (Alpha, V1)	2021-03-17	Europe	Germany	Thuringia	Landkreis Greiz	Zeulenroda-Triebes	7937	50.6489	11.9803	248	20I (Alpha, V1)	B.1.1.7	false	false	false	false	false	false	false	false	false
IMS-10117-CVDP-52FFE98C-2DD6-48E3-AAFC-F78E85C76B54		RKI	ncov	Human	B.1.1.7	20I (Alpha, V1)	2021-03-31	Europe	Germany	Baden-Württemberg	Landkreis Karlsruhe	Ettlingen	76275	48.9409	8.4076		20I (Alpha, V1)	B.1.1.7	false	false	false	false	false	false	false	false	false
6166ba5c81e18c1c41cedc06	1091299677	IIMK	ncov	Human	B.1.1.7	20I (Alpha, V1)	2021-03-17	Europe	Germany	Thuringia	Landkreis Ilm-Kreis	Arnstadt	99310	50.8343	10.9456	49	20I (Alpha, V1)	B.1.1.7	false	false	false	false	false	false	false	false	false
IMS-10020-CVDP-320B6732-BF4B-43AB-A670-98DD79D36B81		RKI	ncov	Human	B.1.1.7	20I (Alpha, V1)	2021-05-04	Europe	Germany	Baden-Württemberg	Landkreis Esslingen	Leinfelden-Echterdingen	70771	48.6941	9.1681		20I (Alpha, V1)	B.1.1.7	false	false	false	false	false	false	false	false	false
IMS-10023-CVDP-5AEAD346-70C9-4EE4-81E9-085378C3A8E3		RKI	ncov	Human	B.1.1.7	20I (Alpha, V1)	2021-04-14	Europe	Germany	Sachsen	Landkreis Erzgebirgskreis	Neukirchen/Erzgebirge	9221	50.7835	12.87		20I (Alpha, V1)	B.1.1.7	false	false	false	false	false	false	false	false	false
IMS-10020-CVDP-4AA1EDA5-38C7-4FE5-9CF2-6B8CF98D189A		RKI	ncov	Human	B.1.1.7	20I (Alpha, V1)	2021-04-15	Europe	Germany	Rheinland-Pfalz	Landkreis Trier; kreisfreie Stadt	Trier	54290	49.7537	6.6393		20I (Alpha, V1)	B.1.1.7	false	false	false	false	false	false	false	false	false
IMS-10020-CVDP-00488		RKI	ncov	Human	B.1.1.7	20I (Alpha, V1)	2021-02-04	Europe	Germany	Nordrhein-Westfalen	Landkreis Leverkusen; Stadt	Leverkusen	51375	51.0331	7.052		20I (Alpha, V1)	Q.7	false	false	false	false	false	false	false	false	false
IMS-10020-CVDP-F48BD54C-FBCB-4E49-8641-61F2C582DC54		RKI	ncov	Human	B.1.1.7	20I (Alpha, V1)	2021-03-16	Europe	Germany	Baden-Württemberg	Landkreis Esslingen	Leinfelden-Echterdingen	70771	48.6941	9.1681		20I (Alpha, V1)	B.1.1.7	false	false	false	false	false	false	false	false	false
IMS-10294-CVDP-9722C819-B9C1-40C2-B99A-07F7D7E3AA8C		RKI	ncov	Human	B.1.1.7	20I (Alpha, V1)	2021-02-20	Europe	Germany	Nordrhein-Westfalen	Landkreis Düsseldorf; Stadt	Düsseldorf	40210	51.2216	6.7897		20I (Alpha, V1)	B.1.1.7	false	false	false	false	false	false	false	false	false
IMS-10020-CVDP-CDB13051-DA3B-4E14-8E4B-00312D2DF541		RKI	ncov	Human	B.1.1.7	20I (Alpha, V1)	2021-03-20	Europe	Germany	Baden-Württemberg	Landkreis Esslingen	Leinfelden-Echterdingen	70771	48.6941	9.1681		20I (Alpha, V1)	B.1.1.7	false	false	false	false	false	false	false	false	false
6166ba5b81e18c1c41cece0f	1091317267	IIMK	ncov	Human	B.1.1.7	20I (Alpha, V1)	2021-04-04	Europe	Germany	Thuringia	Landkreis Ilm-Kreis	Arnstadt	99310	50.8343	10.9456	56	20I (Alpha, V1)	B.1.1.7	false	false	false	false	false	false	false	false	false
IMS-10122-CVDP-B171BCB9-7C4B-4A5A-B4CA-D37544F03778		RKI	ncov	Human	B.1.1.7	20I (Alpha, V1)	2021-02-23	Europe	Germany	Baden-Württemberg	Landkreis Karlsruhe	Karlsruhe	76131	49.0078	8.4199		20I (Alpha, V1)	B.1.1.7	false	false	false	false	false	false	false	false	false
IMS-10020-CVDP-BC57FA2E-B280-4EF1-8D13-4BA75C19B9C1		RKI	ncov	Human	B.1.1.7	20I (Alpha, V1)	2021-02-24	Europe	Germany	Baden-Württemberg	Landkreis Rhein-Neckar-Kreis	Eppelheim	69214	49.4019	8.6364		20I (Alpha, V1)	B.1.1.7	false	false	false	false	false	false	false	false	false
IMS-10020-CVDP-B5CFA5FE-3E6B-475A-AC60-311F7E7302FC		RKI	ncov	Human	B.1.1.7	20I (Alpha, V1)	2021-04-15	Europe	Germany	Baden-Württemberg	Landkreis Esslingen	Leinfelden-Echterdingen	70771	48.6941	9.1681		20I (Alpha, V1)	B.1.1.7	false	false	false	false	false	false	false	false	false
IMS-10013-CVDP-A7301BAF-3FFA-492B-9AF9-03E2010811DA		RKI	ncov	Human	B.1.1.7	20I (Alpha, V1)	2021-03-24	Europe	Germany	Sachsen	Landkreis Nordsachsen	Wermsdorf	4779	51.2833	12.95		20I (Alpha, V1)	B.1.1.7	false	false	false	false	false	false	false	false	false
IMS-10218-CVDP-96DE6889-0B1C-41A6-B2DD-44C9EE9847C1		RKI	ncov	Human	B.1.1.7	20I (Alpha, V1)	2021-03-26	Europe	Germany	Sachsen-Anhalt	Landkreis Landeshauptstadt Magdeburg	Magdeburg	39104	52.1243	11.6322		20I (Alpha, V1)	B.1.1.7	false	false	false	false	false	false	false	false	false
IMS-10150-CVDP-C57237C7-65A7-420E-AC04-04CF860E89D3		RKI	ncov	Human	B.1.1.7	20I (Alpha, V1)	2021-04-24	Europe	Germany	Rheinland-Pfalz	Landkreis Trier; kreisfreie Stadt	Trier	54290	49.7537	6.6393		20I (Alpha, V1)	B.1.1.7	false	false	false	false	false	false	false	false	false
IMS-10117-CVDP-7D262B11-DE96-466F-AC7A-A79A06B96503		RKI	ncov	Human	B.1.1.7	20I (Alpha, V1)	2021-03-23	Europe	Germany	Nordrhein-Westfalen	Landkreis Leverkusen; Stadt	Leverkusen	51375	51.0331	7.052		20I (Alpha, V1)	B.1.1.7	false	false	false	false	false	false	false	false	false
IMS-10020-CVDP-D724E23F-4A87-42AD-8E2A-134769F209B9		RKI	ncov	Human	B.1.1.7	20I (Alpha, V1)	2021-03-24	Europe	Germany	Rheinland-Pfalz	Landkreis Trier; kreisfreie Stadt	Trier	54290	49.7537	6.6393		20I (Alpha, V1)	B.1.1.7	false	false	false	false	false	false	false	false	false
IMS-10013-CVDP-4F1EEFF6-D64B-482C-8EB8-7BBCAB93772C		RKI	ncov	Human	B.1.1.7	20I (Alpha, V1)	2021-04-06	Europe	Germany	Bremen	Landkreis Bremerhaven; Stadt	Bremerhaven	27580	53.5685	8.5968		20I (Alpha, V1)	B.1.1.7	false	false	false	false	false	false	false	false	false
IMS-10013-CVDP-20980A82-4A09-4AE2-A06D-6CC392159328		RKI	ncov	Human	B.1.1.7	20I (Alpha, V1)	2021-03-26	Europe	Germany	Hamburg	Landkreis Hamburg; Freie und Hansestadt	Hamburg	21079	53.5722	10.0031		20I (Alpha, V1)	B.1.1.7	false	false	false	false	false	false	false	false	false
IMS-10116-CVDP-21C4EB36-E27F-4D7B-A8A7-D8F2533D746D		RKI	ncov	Human	B.1.1.7	20I (Alpha, V1)	2021-02-12	Europe	Germany	Berlin	Landkreis Berlin; Stadt	Berlin	13407	52.5727	13.3512		20I (Alpha, V1)	B.1.1.7	false	false	false	false	false	false	false	false	false
IMS-10061-CVDP-8ABDAC28-A2E7-4545-9533-D3ACCF604F65		RKI	ncov	Human	B.1.1.7	20I (Alpha, V1)	2021-04-10	Europe	Germany	Sachsen-Anhalt	Kreisfreie Stadt Halle	Halle	6112	51.4753	11.9973		20I (Alpha, V1)	B.1.1.7	false	false	false	false	false	false	false	false	false
IMS-10087-CVDP-FC5E930B-805E-41ED-AE79-28427A4A6A3E		RKI	ncov	Human	B.1.1.7	20I (Alpha, V1)	2021-03-30	Europe	Germany	Nordrhein-Westfalen	Landkreis Köln; Stadt	Köln	50858	50.9243	6.8565		20I (Alpha, V1)	B.1.1.7	false	false	false	false	false	false	false	false	false
6166ba5b81e18c1c41cec9e2	1024621149	IIMK	ncov	Human	B.1.1.7	20I (Alpha, V1)	2021-05-03	Europe	Germany	Thuringia	Landkreis Gotha	Tambach-Dietharz	99897	50.7925	10.6157	860	20I (Alpha, V1)	B.1.1.7	false	false	false	false	false	false	false	false	true
6166ba5c81e18c1c41ced849	1091282565	IIMK	ncov	Human	B.1.1.7	20I (Alpha, V1)	2021-03-02	Europe	Germany	Thuringia	Landkreis Unstrut-Hainich-Kreis	Mühlhausen	99974	51.2088	10.459	1132	20I (Alpha, V1)	B.1.1.7	false	false	false	false	false	false	false	false	false
IMS-10116-CVDP-0E8EC34B-4FC4-4073-8C9E-191C19748C68		RKI	ncov	Human	B.1.1.7	20I (Alpha, V1)	2021-03-04	Europe	Germany	Sachsen	Kreisfreie Stadt Dresden	Dresden	1067	51.0628	13.7297		20I (Alpha, V1)	B.1.1.7	false	false	false	false	false	false	false	false	false
IMS-10087-CVDP-EC6E633F-209C-4728-8C10-14C32CF86986		RKI	ncov	Human	B.1.1.7	20I (Alpha, V1)	2021-03-16	Europe	Germany	Nordrhein-Westfalen	Landkreis Köln; Stadt	Köln	50858	50.9243	6.8565		20I (Alpha, V1)	B.1.1.7	false	false	false	false	false	false	false	false	false
IMS-10036-CVDP-34913DD2-54E9-42A1-8FDE-8EA3E2D5BC06		RKI	ncov	Human	B.1.1.7	20I (Alpha, V1)	2021-03-11	Europe	Germany	Bayern	Landkreis München	Planegg	82152	48.1067	11.4248		20I (Alpha, V1)	B.1.1.7	false	false	false	false	false	false	false	false	false
IMS-10097-CVDP-CBE5E6A7-50D2-48B6-92B4-3FF9A261BC4F		RKI	ncov	Human	B.1.1.7	20I (Alpha, V1)	2021-04-06	Europe	Germany	Rheinland-Pfalz	Landkreis Mainz; kreisfreie Stadt	Mainz	55128	49.9808	8.2422		20I (Alpha, V1)	B.1.1.7	false	false	false	false	false	false	false	false	false
IMS-10587-CVDP-555C17BF-4E88-40E2-ABBC-609B74205F62		RKI	ncov	Human	B.1.1.7	20I (Alpha, V1)	2021-03-15	Europe	Germany	Hamburg	Landkreis Hamburg; Freie und Hansestadt	Hamburg	20095	53.5722	10.0031		20I (Alpha, V1)	B.1.1.7	false	false	false	false	false	false	false	false	false
IMS-10218-CVDP-EA654D91-799C-4DBF-817F-14FBF35BDFFC		RKI	ncov	Human	B.1.1.7	20I (Alpha, V1)	2021-03-18	Europe	Germany	Sachsen-Anhalt	Landkreis Landeshauptstadt Magdeburg	Magdeburg	39104	52.1243	11.6322		20I (Alpha, V1)	B.1.1.7	false	false	false	false	false	false	false	false	false
IMS-10013-CVDP-78492E79-2DBF-446A-BC09-4E5D6CAFC39D		RKI	ncov	Human	B.1.1.7	20I (Alpha, V1)	2021-04-13	Europe	Germany	Bremen	Kreisfreie Stadt Bremen	Bremen	28357	53.1178	8.8947		20I (Alpha, V1)	B.1.1.7	false	false	false	false	false	false	false	false	false
IMS-10294-CVDP-FCBF6934-ABE3-4E02-B146-0F8583457438		RKI	ncov	Human	B.1.1.7	20I (Alpha, V1)	2021-04-14	Europe	Germany	Nordrhein-Westfalen	Landkreis Düsseldorf; Stadt	Düsseldorf	40477	51.2371	6.7795		20I (Alpha, V1)	B.1.1.7	false	false	false	false	false	false	false	false	false
IMS-10013-CVDP-E1CAF1AC-1ACD-41DF-80F7-280AB427E9A1		RKI	ncov	Human	B.1.1.7	20I (Alpha, V1)	2021-03-17	Europe	Germany	Bayern	Landkreis Augsburg; Stadt	Augsburg	86154	48.3932	10.8814		20I (Alpha, V1)	B.1.1.7	false	false	false	false	false	false	false	false	false
IMS-10117-CVDP-6387A525-B3D6-460D-B29D-0393AA32E355		RKI	ncov	Human	B.1.1.7	20I (Alpha, V1)	2021-03-18	Europe	Germany	Nordrhein-Westfalen	Landkreis Leverkusen; Stadt	Leverkusen	51375	51.0331	7.052		20I (Alpha, V1)	B.1.1.7	false	false	false	false	false	false	false	false	false
IMS-10432-CVDP-1505D1D4-079A-4B73-85DB-745581254C10		RKI	ncov	Human	B.1.1.7	20I (Alpha, V1)	2021-04-01	Europe	Germany	Niedersachsen	Landkreis Region Hannover	Hannover	30167	52.3914	9.7083		20I (Alpha, V1)	B.1.1.7	false	false	false	false	false	false	false	false	false
IMS-10116-CVDP-FB198ADC-E8A3-45BA-B21C-C43FF0D4AB55		RKI	ncov	Human	B.1.1.7	20I (Alpha, V1)	2021-03-18	Europe	Germany	Sachsen	Kreisfreie Stadt Dresden	Dresden	1067	51.0628	13.7297		20I (Alpha, V1)	B.1.1.7	false	false	false	false	false	false	false	false	false
IMS-10020-CVDP-87524963-3B2F-4957-B2DC-59A8F3E434F3		RKI	ncov	Human	B.1.1.7	20I (Alpha, V1)	2021-03-05	Europe	Germany	Rheinland-Pfalz	Landkreis Trier; kreisfreie Stadt	Trier	54290	49.7537	6.6393		20I (Alpha, V1)	B.1.1.7	false	false	false	false	false	false	false	false	false
IMS-10375-CVDP-B2935BE6-18D7-4667-9F84-101799D95708		RKI	ncov	Human	B.1.1.7	20I (Alpha, V1)	2021-04-19	Europe	Germany	Baden-Württemberg	Landkreis Heidelberg	Heidelberg	69120	49.4169	8.6764		20I (Alpha, V1)	B.1.1.7	false	false	false	false	false	false	false	false	false
6166ba5c81e18c1c41cedc91	1091302389	IIMK	ncov	Human	B.1.1.7	20I (Alpha, V1)	2021-03-19	Europe	Germany	Thuringia	Landkreis Ilm-Kreis	Arnstadt	99310	50.8343	10.9456	37	20I (Alpha, V1)	B.1.1.7	false	false	false	false	false	false	false	false	false
IMS-10122-CVDP-781F5938-DDD8-4B15-807D-BE597899C0ED		RKI	ncov	Human	B.1.1.7	20I (Alpha, V1)	2021-03-25	Europe	Germany	Sachsen	Kreisfreie Stadt Leipzig	Leipzig	4289	51.3667	12.3833		20I (Alpha, V1)	B.1.1.7	false	false	false	false	false	false	false	false	false
IMS-10117-CVDP-BE23C445-3D2D-4746-91E0-C5901372C4B5		RKI	ncov	Human	B.1.1.7	20I (Alpha, V1)	2021-03-24	Europe	Germany	Baden-Württemberg	Landkreis Rhein-Neckar-Kreis	Eppelheim	69214	49.4019	8.6364		20I (Alpha, V1)	B.1.1.7	false	false	false	false	false	false	false	false	false
IMS-10122-CVDP-1013		RKI	ncov	Human	B.1.1.7	20I (Alpha, V1)	2021-02-05	Europe	Germany	Baden-Württemberg	Landkreis Karlsruhe	Karlsruhe	76131	49.0078	8.4199		20I (Alpha, V1)	B.1.1.7	false	false	false	false	false	false	false	false	false
IMS-10122-CVDP-1B3DA461-569E-453A-9EF0-184CF7D69192		RKI	ncov	Human	B.1.1.7	20I (Alpha, V1)	2021-03-01	Europe	Germany	Baden-Württemberg	Landkreis Karlsruhe	Karlsruhe	76131	49.0078	8.4199		20I (Alpha, V1)	B.1.1.7	false	false	false	false	false	false	false	false	false
IMS-10013-CVDP-6A51B65F-8995-4653-9803-33CE5DC3A340		RKI	ncov	Human	B.1.1.7	20I (Alpha, V1)	2021-04-21	Europe	Germany	Bayern	Landkreis Augsburg; Stadt	Augsburg	86154	48.3932	10.8814		20I (Alpha, V1)	B.1.1.7	false	false	false	false	false	false	false	false	false
IMS-10117-CVDP-ACA6C391-9EB3-4F78-87E5-17E0581DEA83		RKI	ncov	Human	B.1.1.7	20I (Alpha, V1)	2021-03-25	Europe	Germany	Baden-Württemberg	Landkreis Karlsruhe	Ettlingen	76275	48.9409	8.4076		20I (Alpha, V1)	B.1.1.7	false	false	false	false	false	false	false	false	false
IMS-10004-CVDP-5A4FD9B8-70E8-4992-8F97-9E796297C1BA		RKI	ncov	Human	B.1.1.7	20I (Alpha, V1)	2021-03-10	Europe	Germany	Schleswig-Holstein	Kreis Herzogtum Lauenburg	Kreis Herzogtum Lauenburg	21502	53.5966	10.5762		20I (Alpha, V1)	B.1.1.7	false	false	false	false	false	false	false	false	false
IMS-10186-CVDP-7C1EC4E0-1DD6-422C-9254-CCD1C564E2DC		RKI	ncov	Human	B.1.1.7	20I (Alpha, V1)	2021-02-15	Europe	Germany	Nordrhein-Westfalen	Landkreis Düsseldorf; Stadt	Düsseldorf	40210	51.2216	6.7897		20I (Alpha, V1)	B.1.1.7	false	false	false	false	false	false	false	false	false
IMS-10209-CVDP-6E0460C9-FABF-429F-B63D-F3DDA650B7BC		RKI	ncov	Human	B.1.1.7	20I (Alpha, V1)	2021-04-12	Europe	Germany	Baden-Württemberg	Landkreis Konstanz	Konstanz	78467	47.6744	9.1649		20I (Alpha, V1)	B.1.1.7	false	false	false	false	false	false	false	false	false
IMS-10117-CVDP-D8789D7A-007F-4AE3-9FBB-7BB9BE64B8C0		RKI	ncov	Human	B.1.1.7	20I (Alpha, V1)	2021-03-31	Europe	Germany	Baden-Württemberg	Landkreis Karlsruhe	Ettlingen	76275	48.9409	8.4076		20I (Alpha, V1)	B.1.1.7	false	false	false	false	false	false	false	false	false
6166ba5c81e18c1c41cedde2	1024550640	IIMK	ncov	Human	B.1.1.7	20I (Alpha, V1)	2021-03-25	Europe	Germany	Thuringia	Landkreis Sömmerda	Großrudestedt	99195	51.092	11.1	50	20I (Alpha, V1)	B.1.1.7	false	false	false	false	false	false	false	false	true
IMS-10116-CVDP-8186EA27-ABA0-4F58-A97D-3C72258C4F82		RKI	ncov	Human	B.1.1.7	20I (Alpha, V1)	2021-04-09	Europe	Germany	Baden-Württemberg	Landkreis Heidelberg	Heidelberg	69126	49.3757	8.6911		20I (Alpha, V1)	B.1.1.7	true	false	false	false	false	false	false	false	false
IMS-10122-CVDP-30B8CD3D-DEAA-40CE-AA8A-A3D739F6EA72		RKI	ncov	Human	B.1.1.7	20I (Alpha, V1)	2021-02-25	Europe	Germany	Baden-Württemberg	Landkreis Karlsruhe	Karlsruhe	76131	49.0078	8.4199		20I (Alpha, V1)	B.1.1.7	false	false	false	false	false	false	false	false	false
IMS-10150-CVDP-010157BA-3CFD-4E71-9DC6-2A2DEB715FA2		RKI	ncov	Human	B.1.1.7	20I (Alpha, V1)	2021-05-04	Europe	Germany	Nordrhein-Westfalen	Landkreis Leverkusen; Stadt	Leverkusen	51375	51.0331	7.052		20I (Alpha, V1)	B.1.1.7	false	false	false	false	false	false	false	false	false
IMS-10020-CVDP-0F76C667-03C9-487A-A8D1-52BCCF54CA15		RKI	ncov	Human	B.1.1.7	20I (Alpha, V1)	2021-03-17	Europe	Germany	Rheinland-Pfalz	Landkreis Trier; kreisfreie Stadt	Trier	54290	49.7537	6.6393		20I (Alpha, V1)	B.1.1.7	false	false	false	false	false	false	false	false	false
IMS-10150-CVDP-9C6C4884-DCF7-4C86-9850-675D2C1892D0		RKI	ncov	Human	B.1.1.7	20I (Alpha, V1)	2021-05-04	Europe	Germany	Rheinland-Pfalz	Landkreis Trier; kreisfreie Stadt	Trier	54290	49.7537	6.6393		20I (Alpha, V1)	B.1.1.7	false	false	false	false	false	false	false	false	false
IMS-10020-CVDP-40F06B90-F1BC-4FA4-AAC2-4299CAA9BE07		RKI	ncov	Human	B.1.1.7	20I (Alpha, V1)	2021-03-17	Europe	Germany	Baden-Württemberg	Landkreis Esslingen	Leinfelden-Echterdingen	70771	48.6941	9.1681		20I (Alpha, V1)	B.1.1.7	false	false	false	false	false	false	false	false	false
IMS-10370-CVDP-2750FA86-19C6-4884-865D-963DDD654329		RKI	ncov	Human	B.1.1.7	20I (Alpha, V1)	2021-04-01	Europe	Germany	Brandenburg	Kreisfreie Stadt Potsdam	Potsdam	14467	52.403	13.0626		20I (Alpha, V1)	B.1.1.7	false	false	false	false	false	false	false	false	false
6166ba5b81e18c1c41ced0d8	1091328027	IIMK	ncov	Human	B.1.1.7	20I (Alpha, V1)	2021-04-15	Europe	Germany	Thuringia	Landkreis Nordhausen	Nordhausen	99734	51.4946	10.7878	72	20I (Alpha, V1)	B.1.1.7	false	false	false	false	false	false	false	false	false
IMS-10023-CVDP-A9241D7C-4FC7-48FD-AC84-127315CEF51F		RKI	ncov	Human	B.1.1.7	20I (Alpha, V1)	2021-03-08	Europe	Germany	Sachsen	Landkreis Erzgebirgskreis	Neukirchen/Erzgebirge	9221	50.7835	12.87		20I (Alpha, V1)	B.1.1.7	false	false	false	false	false	false	false	false	false
IMS-10122-CVDP-EDAC5BD1-DBAA-4219-9A68-2A18F294BB57		RKI	ncov	Human	B.1.1.7	20I (Alpha, V1)	2021-03-24	Europe	Germany	Baden-Württemberg	Landkreis Karlsruhe	Karlsruhe	76131	49.0078	8.4199		20I (Alpha, V1)	B.1.1.7	false	false	false	false	false	false	false	false	false
IMS-10116-CVDP-4BC762E7-C9F5-4B3D-AE56-0BA6B647D19C		RKI	ncov	Human	B.1.1.7	20I (Alpha, V1)	2021-03-08	Europe	Germany	Berlin	Landkreis Berlin; Stadt	Berlin	13407	52.5727	13.3512		20I (Alpha, V1)	B.1.1.7	false	false	false	false	false	false	false	false	false
IMS-10122-CVDP-2A37BAA4-3F01-4E3A-8076-09725D8002AA		RKI	ncov	Human	B.1.1.7	20I (Alpha, V1)	2021-04-27	Europe	Germany	Baden-Württemberg	Landkreis Karlsruhe	Karlsruhe	76131	49.0078	8.4199		20I (Alpha, V1)	B.1.1.7	false	false	false	false	false	false	false	false	false
IMS-10116-CVDP-08F76BF1-C6BC-4B2E-89AC-32B516F101CE		RKI	ncov	Human	B.1.1.7	20I (Alpha, V1)	2021-04-22	Europe	Germany	Sachsen	Kreisfreie Stadt Dresden	Dresden	1067	51.0628	13.7297		20I (Alpha, V1)	B.1.1.7	false	false	false	false	false	false	false	false	false
IMS-10122-CVDP-A6FD64BB-A4C0-40A9-A19A-A6CD7D134FAC		RKI	ncov	Human	B.1.1.7	20I (Alpha, V1)	2021-04-23	Europe	Germany	Baden-Württemberg	Landkreis Karlsruhe	Karlsruhe	76131	49.0078	8.4199		20I (Alpha, V1)	B.1.1.7	false	false	false	false	false	false	false	false	false
IMS-10004-CVDP-B076B35E-B468-44E6-8A81-44A079BD8864		RKI	ncov	Human	B.1.1.7	20I (Alpha, V1)	2021-04-05	Europe	Germany	Schleswig-Holstein	Kreis Herzogtum Lauenburg	Kreis Herzogtum Lauenburg	21502	53.5966	10.5762		20I (Alpha, V1)	B.1.1.7	false	false	false	false	false	false	false	false	false
IMS-10294-CVDP-1DD487A4-F1A9-4528-834D-DA5D4AD23938		RKI	ncov	Human	B.1.1.7	20I (Alpha, V1)	2021-03-07	Europe	Germany	Nordrhein-Westfalen	Landkreis Düsseldorf; Stadt	Düsseldorf	40477	51.2371	6.7795		20I (Alpha, V1)	B.1.1.7	false	false	false	false	false	false	false	false	false
IMS-10020-CVDP-B32C59F6-7D85-444E-91A2-EC483108AB57		RKI	ncov	Human	B.1.1.7	20I (Alpha, V1)	2021-04-11	Europe	Germany	Baden-Württemberg	Landkreis Esslingen	Leinfelden-Echterdingen	70771	48.6941	9.1681		20I (Alpha, V1)	B.1.1.7	false	false	false	false	false	false	false	false	false
IMS-10020-CVDP-A6F90543-1265-4DE5-B791-886BDB7ABEFE		RKI	ncov	Human	B.1.1.7	20I (Alpha, V1)	2021-04-27	Europe	Germany	Berlin	Landkreis Berlin; Stadt	Berlin	10829	52.4761	13.3607		20I (Alpha, V1)	B.1.1.7	false	false	false	false	false	false	false	false	false
IMS-10061-CVDP-5A9DA568-75D5-4FCA-B313-B3C6D17CB6FD		RKI	ncov	Human	B.1.1.7	20I (Alpha, V1)	2021-04-26	Europe	Germany	Niedersachsen	Landkreis Göttingen	Göttingen	37077	51.5604	9.9319		20I (Alpha, V1)	B.1.1.7	false	false	false	false	false	false	false	false	false
IMS-10296-CVDP-00016		RKI	ncov	Human	B.1.1.7	20I (Alpha, V1)	2021-01-28	Europe	Germany	Hessen	Landkreis Marburg-Biedenkopf	Marburg	35043	50.7765	8.7645		20I (Alpha, V1)	B.1.1.7	false	false	false	false	false	false	false	false	false
6166ba5b81e18c1c41ced029	1091323254	IIMK	ncov	Human	B.1.1.7	20I (Alpha, V1)	2021-04-11	Europe	Germany	Thuringia	Landkreis Weimar; Stadt	Weimar	99423	50.9803	11.3272	83	20I (Alpha, V1)	B.1.1.7	false	false	false	false	false	false	false	false	false
IMS-10020-CVDP-86A62C34-78F9-4EBD-A5ED-02F9475EE9E1		RKI	ncov	Human	B.1.1.7	20I (Alpha, V1)	2021-04-14	Europe	Germany	Rheinland-Pfalz	Landkreis Trier; kreisfreie Stadt	Trier	54290	49.7537	6.6393		20I (Alpha, V1)	B.1.1.7	false	false	false	false	false	false	false	false	false
6166ba5c81e18c1c41cede09	1024626902	IIMK	ncov	Human	B.1.1.7	20I (Alpha, V1)	2021-03-26	Europe	Germany	Thuringia	Landkreis Gotha	Waltershausen	99880	50.8998	10.5563	80	20I (Alpha, V1)	B.1.1.7	false	false	false	false	false	false	false	false	false
IMS-10087-CVDP-13984230-0FD6-4FAD-A5D0-26C74D66D11B		RKI	ncov	Human	B.1.1.7	20I (Alpha, V1)	2021-02-28	Europe	Germany	Nordrhein-Westfalen	Landkreis Köln; Stadt	Köln	50858	50.9243	6.8565		20I (Alpha, V1)	B.1.1.7	false	false	false	false	false	false	false	false	false
IMS-10020-CVDP-5A326ABD-7E4D-4C72-847B-194D2B225BA8		RKI	ncov	Human	B.1.1.7	20I (Alpha, V1)	2021-04-10	Europe	Germany	Nordrhein-Westfalen	Landkreis Leverkusen; Stadt	Leverkusen	51375	51.0331	7.052		20I (Alpha, V1)	B.1.1.7	false	false	false	false	false	false	false	true	false
IMS-10117-CVDP-3A45130A-CD8F-4BB4-9BF1-EC41164736F4		RKI	ncov	Human	B.1.1.7	20I (Alpha, V1)	2021-04-15	Europe	Germany	Baden-Württemberg	Landkreis Rhein-Neckar-Kreis	Eppelheim	69214	49.4019	8.6364		20I (Alpha, V1)	B.1.1.7	false	false	false	false	false	false	false	false	false
IMS-10004-CVDP-DEC0CBD1-E158-4B52-87B5-D47715A12D49		RKI	ncov	Human	B.1.1.7	20I (Alpha, V1)	2021-03-01	Europe	Germany	Schleswig-Holstein	Kreis Herzogtum Lauenburg	Kreis Herzogtum Lauenburg	21502	53.5966	10.5762		20I (Alpha, V1)	B.1.1.7	false	false	false	false	false	false	false	false	false
IMS-10183-CVDP-80B0D752-8505-40AC-AFCE-FB463B811B7F		RKI	ncov	Human	B.1.1.7	20I (Alpha, V1)	2021-02-17	Europe	Germany	Bayern	Landkreis Kempten (Allgäu)	Kempten	87435	47.7184	10.3132		20I (Alpha, V1)	B.1.1.7	false	false	false	false	false	false	false	false	false
IMS-10261-CVDP-025DD4CC-B71A-43DC-8E64-DECFE6A59723		RKI	ncov	Human	B.1.1.7	20I (Alpha, V1)	2021-03-08	Europe	Germany	Nordrhein-Westfalen	Landkreis Lippe	Bad Salzuflen	32105	52.0808	8.7505		20I (Alpha, V1)	B.1.1.7	false	false	false	false	false	false	false	false	false
6166ba5b81e18c1c41cecea9	1024625458	IIMK	ncov	Human	B.1.1.7	20I (Alpha, V1)	2021-04-07	Europe	Germany	Thuringia	Landkreis Gotha	Friedrichroda	99894	50.8575	10.5651	809	20I (Alpha, V1)	B.1.1.7	false	false	false	false	false	false	false	false	false
IMS-10004-CVDP-155F21A6-9406-46EA-A320-14703C62370C		RKI	ncov	Human	B.1.1.7	20I (Alpha, V1)	2021-04-12	Europe	Germany	Schleswig-Holstein	Kreis Herzogtum Lauenburg	Kreis Herzogtum Lauenburg	21502	53.5966	10.5762		20I (Alpha, V1)	B.1.1.7	false	false	false	false	false	false	false	false	false
IMS-10020-CVDP-F8ABD4F9-A09B-4ADD-9C2C-CF6A306C0AC9		RKI	ncov	Human	B.1.1.7	20I (Alpha, V1)	2021-04-13	Europe	Germany	Nordrhein-Westfalen	Landkreis Leverkusen; Stadt	Leverkusen	51375	51.0331	7.052		20I (Alpha, V1)	B.1.1.7	false	false	false	false	false	false	false	false	false
6166ba5b81e18c1c41cecb9f	1050231978	IIMK	ncov	Human	B.1.1.7	20I (Alpha, V1)	2021-05-09	Europe	Germany	Thuringia	Landkreis Gera	Gera	7549	50.8753	12.0788	35	20I (Alpha, V1)	B.1.1.7	false	false	false	false	false	false	false	false	false
IMS-10020-CVDP-04C483B0-9A52-4200-9005-D5BD370502CD		RKI	ncov	Human	B.1.1.7	20I (Alpha, V1)	2021-02-10	Europe	Germany	Rheinland-Pfalz	Landkreis Trier; kreisfreie Stadt	Trier	54290	49.7537	6.6393		20I (Alpha, V1)	B.1.1.7	false	false	false	false	false	false	false	false	false
IMS-10183-CVDP-2046F0E2-4D42-4B6B-86FE-883CF8D85C3F		RKI	ncov	Human	B.1.1.7	20I (Alpha, V1)	2021-02-23	Europe	Germany	Bayern	Landkreis Kempten (Allgäu)	Kempten	87435	47.7184	10.3132		20I (Alpha, V1)	B.1.1.7	false	false	false	false	false	false	false	false	false
IMS-10020-CVDP-775920D0-2388-4B78-A5F6-C403A41ADC1B		RKI	ncov	Human	B.1.1.7	20I (Alpha, V1)	2021-03-29	Europe	Germany	Baden-Württemberg	Landkreis Esslingen	Leinfelden-Echterdingen	70771	48.6941	9.1681		20I (Alpha, V1)	B.1.1.7	false	false	false	false	false	false	false	false	false
IMS-10020-CVDP-FFC72837-C81A-49F5-8030-C382402C2992		RKI	ncov	Human	B.1.1.7	20I (Alpha, V1)	2021-02-17	Europe	Germany	Bayern	Landkreis Weiden i.d.OPf.	Weiden	92637	49.6768	12.1561		20I (Alpha, V1)	B.1.1.7	false	false	false	false	false	false	false	false	false
IMS-10594-CVDP-B5C552AF-7329-40D9-8EE1-E248EF1AE0E2		RKI	ncov	Human	B.1.1.7	20I (Alpha, V1)	2021-03-28	Europe	Germany	Nordrhein-Westfalen	Landkreis Münster; Stadt	Münster	48153	51.9268	7.6313		20I (Alpha, V1)	B.1.1.7	false	false	false	false	false	false	false	false	false
IMS-10150-CVDP-D17E8504-880F-4658-94A2-6C323131DF19		RKI	ncov	Human	B.1.1.7	20I (Alpha, V1)	2021-05-04	Europe	Germany	Rheinland-Pfalz	Landkreis Trier; kreisfreie Stadt	Trier	54290	49.7537	6.6393		20I (Alpha, V1)	B.1.1.7	false	false	false	false	false	false	false	false	false
IMS-10294-CVDP-3AAED75B-7E9A-4954-AF5F-2BF1E993AC7F		RKI	ncov	Human	B.1.1.7	20I (Alpha, V1)	2021-02-25	Europe	Germany	Nordrhein-Westfalen	Landkreis Düsseldorf; Stadt	Düsseldorf	40210	51.2216	6.7897		20I (Alpha, V1)	B.1.1.7	false	false	false	false	false	false	false	false	false
IMS-10013-CVDP-DCB5D731-2F1B-4A2F-8F7A-75A8CCB42BF0		RKI	ncov	Human	B.1.1.7	20I (Alpha, V1)	2021-02-19	Europe	Germany	Sachsen	Landkreis Nordsachsen	Wermsdorf	4779	51.2833	12.95		20I (Alpha, V1)	B.1.1.7	false	false	false	false	false	false	false	false	false
IMS-10432-CVDP-CE89B1DC-9959-4468-A277-BC0CB115FF1B		RKI	ncov	Human	B.1.1.7	20I (Alpha, V1)	2021-03-27	Europe	Germany	Niedersachsen	Landkreis Region Hannover	Hannover	30167	52.3914	9.7083		20I (Alpha, V1)	B.1.1.7	false	false	false	false	false	false	false	false	false
IMS-10087-CVDP-5898BF35-95DB-4E44-8165-7898755214B2		RKI	ncov	Human	B.1.1.7	20I (Alpha, V1)	2021-03-25	Europe	Germany	Nordrhein-Westfalen	Landkreis Köln; Stadt	Köln	50858	50.9243	6.8565		20I (Alpha, V1)	B.1.1.7	false	false	false	false	false	false	false	false	false
IMS-10267-CVDP-9F502873-ACE6-456D-B668-2B8BA558CDA2		RKI	ncov	Human	B.1.1.7	20I (Alpha, V1)	2021-03-15	Europe	Germany	Nordrhein-Westfalen	Landkreis Dortmund; Stadt	Dortmund	44137	51.5097	7.4601		20I (Alpha, V1)	B.1.1.7	false	false	false	false	false	false	false	false	false
IMS-10004-CVDP-8A8A8870-B7C6-496E-9EE8-708B5E009A15		RKI	ncov	Human	B.1.1.7	20I (Alpha, V1)	2021-02-15	Europe	Germany	Schleswig-Holstein	Kreis Herzogtum Lauenburg	Kreis Herzogtum Lauenburg	21502	53.5966	10.5762		20I (Alpha, V1)	B.1.1.7	false	false	false	false	false	false	false	false	false
IMS-10020-CVDP-EB5F97ED-86FC-4E04-A0C7-D86DAE66B5F9		RKI	ncov	Human	B.1.1.7	20I (Alpha, V1)	2021-03-01	Europe	Germany	Baden-Württemberg	Landkreis Esslingen	Leinfelden-Echterdingen	70771	48.6941	9.1681		20I (Alpha, V1)	B.1.1.7	false	false	false	false	false	false	false	false	false
IMS-10150-CVDP-EE40C6A9-49A6-47A0-B307-86D4826EECF9		RKI	ncov	Human	B.1.1.7	20I (Alpha, V1)	2021-04-29	Europe	Germany	Rheinland-Pfalz	Landkreis Trier; kreisfreie Stadt	Trier	54290	49.7537	6.6393		20I (Alpha, V1)	B.1.1.7	false	false	false	false	false	false	false	false	false
IMS-10375-CVDP-DACB6A67-D75D-4771-A491-D21A7CABF68D		RKI	ncov	Human	B.1.1.7	20I (Alpha, V1)	2021-03-08	Europe	Germany	Baden-Württemberg	Landkreis Heidelberg	Heidelberg	69120	49.4169	8.6764		20I (Alpha, V1)	Q.7	false	false	false	false	false	false	false	false	false
IMS-10020-CVDP-A6263C8E-C91F-43AA-8765-F82D18CA41B7		RKI	ncov	Human	B.1.1.7	20I (Alpha, V1)	2021-03-16	Europe	Germany	Rheinland-Pfalz	Landkreis Trier; kreisfreie Stadt	Trier	54290	49.7537	6.6393		20I (Alpha, V1)	B.1.1.7	false	false	false	false	false	false	false	false	false
IMS-10116-CVDP-5F2393CB-0188-43C4-8D1B-E45B07492850		RKI	ncov	Human	B.1.1.7	20I (Alpha, V1)	2021-05-03	Europe	Germany	Baden-Württemberg	Landkreis Ravensburg	Ravensburg	88212	47.7815	9.6183		20I (Alpha, V1)	B.1.1.7	false	false	false	false	false	false	false	false	false
IMS-10261-CVDP-E314A0E2-09EA-4FAD-A4F4-5B1783810829		RKI	ncov	Human	B.1.1.7	20I (Alpha, V1)	2021-04-27	Europe	Germany	Nordrhein-Westfalen	Landkreis Lippe	Bad Salzuflen	32105	52.0808	8.7505		20I (Alpha, V1)	B.1.1.7	false	false	false	false	false	false	false	false	false
IMS-10004-CVDP-9C32BD4B-1F99-46BA-AA44-A669892040E7		RKI	ncov	Human	B.1.1.7	20I (Alpha, V1)	2021-03-25	Europe	Germany	Schleswig-Holstein	Kreis Herzogtum Lauenburg	Kreis Herzogtum Lauenburg	21502	53.5966	10.5762		20I (Alpha, V1)	B.1.1.7	false	false	false	false	false	false	false	false	false
IMS-10013-CVDP-FC369F0A-0DA8-4E91-88BA-7C75F436C08C		RKI	ncov	Human	B.1.1.7	20I (Alpha, V1)	2021-04-07	Europe	Germany	Hessen	Landkreis Frankfurt am Main; Stadt	Frankfurt am Main	60590	50.0837	8.644		20I (Alpha, V1)	B.1.1.7	false	false	false	false	false	false	false	false	false
IMS-10383-CVDP-C017F7F7-B48A-4792-9F8A-C000F046CBCA		RKI	ncov	Human	B.1.1.7	20I (Alpha, V1)	2021-03-25	Europe	Germany	Bayern	Regensburg; Stadt	Regensburg	93053	48.9965	12.1202		20I (Alpha, V1)	B.1.1.7	false	false	false	false	false	false	false	false	false
IMS-10294-CVDP-CE4B4AB3-A0E8-487A-81F7-099FDFBE163F		RKI	ncov	Human	B.1.1.7	20I (Alpha, V1)	2021-02-16	Europe	Germany	Nordrhein-Westfalen	Landkreis Düsseldorf; Stadt	Düsseldorf	40477	51.2371	6.7795		20I (Alpha, V1)	B.1.1.7	false	false	false	false	false	false	false	false	false
IMS-10122-CVDP-83D46AA6-4221-4261-A9A2-E0DED2EBF3E3		RKI	ncov	Human	B.1.1.7	20I (Alpha, V1)	2021-04-27	Europe	Germany	Baden-Württemberg	Landkreis Karlsruhe	Karlsruhe	76131	49.0078	8.4199		20I (Alpha, V1)	B.1.1.7	false	false	false	false	false	false	false	false	false
IMS-10117-CVDP-8B776D8A-0658-4667-A00D-246CD3237E66		RKI	ncov	Human	B.1.1.7	20I (Alpha, V1)	2021-03-30	Europe	Germany	Nordrhein-Westfalen	Landkreis Leverkusen; Stadt	Leverkusen	51375	51.0331	7.052		20I (Alpha, V1)	B.1.1.7	false	false	false	false	false	false	false	false	false
IMS-10036-CVDP-AE2867AE-45BA-4CE0-8BE2-B7C903EA6F6B		RKI	ncov	Human	B.1.1.7	20I (Alpha, V1)	2021-03-01	Europe	Germany	Berlin	Landkreis Berlin; Stadt	Berlin	12247	52.4395	13.3462		20I (Alpha, V1)	B.1.1.7	false	false	false	false	false	false	false	false	false
IMS-10174-CVDP-69B2CF9B-57C8-4227-90BD-282552B916A3		RKI	ncov	Human	B.1.1.7	20I (Alpha, V1)	2021-03-30	Europe	Germany	Bayern	Kreisfreie Stadt München	München	80937	48.1974	11.5721		20I (Alpha, V1)	B.1.1.7	false	false	false	false	false	false	false	false	false
IMS-10020-CVDP-4B755E40-D15F-4146-AC29-2D476822F6B1		RKI	ncov	Human	B.1.1.7	20I (Alpha, V1)	2021-04-11	Europe	Germany	Baden-Württemberg	Landkreis Esslingen	Leinfelden-Echterdingen	70771	48.6941	9.1681		20I (Alpha, V1)	B.1.1.7	false	false	false	false	false	false	false	false	false
IMS-10227-CVDP-285A1E91-9C4A-4CAC-BE0E-521AB5DA54EF		RKI	ncov	Human	B.1.1.7	20I (Alpha, V1)	2021-04-21	Europe	Germany	Nordrhein-Westfalen	Landkreis Düsseldorf; Stadt	Düsseldorf	40477	51.2371	6.7795		20I (Alpha, V1)	B.1.1.7	false	false	false	false	false	false	false	false	false
IMS-10215-CVDP-5942D407-9670-4A45-8B18-AD6AF45782A5		RKI	ncov	Human	B.1.1.7	20I (Alpha, V1)	2021-03-04	Europe	Germany	Sachsen	Kreisfreie Stadt Leipzig	Leipzig	4103	51.3405	12.3827		20I (Alpha, V1)	B.1.1.7	false	false	false	false	false	false	false	false	false
IMS-10594-CVDP-71E7B3CD-388A-4C4F-AB78-C024463F937F		RKI	ncov	Human	B.1.1.7	20I (Alpha, V1)	2021-04-19	Europe	Germany	Nordrhein-Westfalen	Landkreis Münster; Stadt	Münster	48153	51.9268	7.6313		20I (Alpha, V1)	B.1.1.7	false	false	false	false	false	false	false	false	false
IMS-10020-CVDP-21B71410-A3B9-405A-AD69-67B9EAC3723F		RKI	ncov	Human	B.1.1.7	20I (Alpha, V1)	2021-02-11	Europe	Germany	Bayern	Landkreis Weiden i.d.OPf.	Weiden	92637	49.6768	12.1561		20I (Alpha, V1)	B.1.1.7	false	false	false	false	false	false	false	false	false
IMS-10587-CVDP-67D9371E-D3CB-4906-807F-DB5EF537D12B		RKI	ncov	Human	B.1.1.7	20I (Alpha, V1)	2021-02-23	Europe	Germany	Hamburg	Landkreis Hamburg; Freie und Hansestadt	Hamburg	20095	53.5722	10.0031		20I (Alpha, V1)	B.1.1.7	false	false	false	false	false	false	false	false	false
IMS-10061-CVDP-D9E404A8-6293-4FD1-8C42-33C388D592B6		RKI	ncov	Human	B.1.1.7	20I (Alpha, V1)	2021-04-19	Europe	Germany	Niedersachsen	Landkreis Göttingen	Göttingen	37077	51.5604	9.9319		20I (Alpha, V1)	B.1.1.7	false	false	false	false	false	false	false	false	false
IMS-10087-CVDP-9E9F7A7B-6A7B-4ABF-8465-C563668A0483		RKI	ncov	Human	B.1.1.7	20I (Alpha, V1)	2021-04-14	Europe	Germany	Nordrhein-Westfalen	Landkreis Köln; Stadt	Köln	50858	50.9243	6.8565		20I (Alpha, V1)	B.1.1.7	false	false	false	false	false	false	false	false	false
IMS-10013-CVDP-CED97655-4B79-4D7E-AEC5-6AF10ACE6FA3		RKI	ncov	Human	B.1.1.7	20I (Alpha, V1)	2021-03-05	Europe	Germany	Bremen	Kreisfreie Stadt Bremen	Bremen	28357	53.1178	8.8947		20I (Alpha, V1)	B.1.1.7	false	false	false	false	false	false	false	false	false
6166ba5b81e18c1c41cecfae	1009018486	IIMK	ncov	Human	B.1.1.7	20I (Alpha, V1)	2021-04-09	Europe	Germany	Thuringia	Landkreis Saale-Holzland-Kreis	Stadtroda	7646	50.86	11.7281	256	20I (Alpha, V1)	B.1.1.7	false	false	false	false	false	false	false	false	false
IMS-10020-CVDP-983424D4-AD70-43AE-BF13-92B62F1A7A79		RKI	ncov	Human	B.1.1.7	20I (Alpha, V1)	2021-04-05	Europe	Germany	Rheinland-Pfalz	Landkreis Trier; kreisfreie Stadt	Trier	54290	49.7537	6.6393		20I (Alpha, V1)	B.1.1.7	false	false	false	false	false	false	false	false	false
IMS-10020-CVDP-E8741636-B6A4-4CC3-8486-81C4AD5AA526		RKI	ncov	Human	B.1.1.7	20I (Alpha, V1)	2021-02-12	Europe	Germany	Bayern	Landkreis Weiden i.d.OPf.	Weiden	92637	49.6768	12.1561		20I (Alpha, V1)	B.1.1.7	false	false	false	false	false	false	false	false	false
IMS-10116-CVDP-17EAB0F7-86DB-44FF-BE93-8CA8F62B876D		RKI	ncov	Human	B.1.1.7	20I (Alpha, V1)	2021-04-17	Europe	Germany	Berlin	Landkreis Berlin; Stadt	Berlin	13407	52.5727	13.3512		20I (Alpha, V1)	B.1.1.7	false	false	false	false	false	false	false	false	false
6166b85c81e18c1c41cec7aa	IMS-10013-CVDP-518ec295-b64e-43bf-9dfd-1ec5f45ba6a0	IIMK	ncov	Human	B.1.1.7	20I (Alpha, V1)	2021-04-15	Europe	Germany	Thuringia	Landkreis Jena; Stadt	Jena	7751	50.9283	11.5853	32	20I (Alpha, V1)	B.1.1.7	false	true	false	false	false	false	false	true	false
IMS-10173-CVDP-F2D069A5-DFF5-45B6-B92F-8FC32DFF6BC4		RKI	ncov	Human	B.1.1.7	20I (Alpha, V1)	2021-04-12	Europe	Germany	Nordrhein-Westfalen	Landkreis Minden-Lübbecke	Bad Oeynhausen	32545	52.1917	8.8093		20I (Alpha, V1)	B.1.1.7	false	false	false	false	false	false	false	false	false
6166ba5b81e18c1c41ced000	1091320992	IIMK	ncov	Human	B.1.1.7	20I (Alpha, V1)	2021-04-08	Europe	Germany	Thuringia	Landkreis Weimar; Stadt	Weimar	99423	50.9803	11.3272	177	20I (Alpha, V1)	B.1.1.7	false	false	false	false	false	false	false	false	false
IMS-10013-CVDP-0A25864E-DA3A-4337-897A-58D876543F40		RKI	ncov	Human	B.1.1.7	20I (Alpha, V1)	2021-02-14	Europe	Germany	Sachsen	Landkreis Nordsachsen	Wermsdorf	4779	51.2833	12.95		20I (Alpha, V1)	B.1.1.7	false	false	false	false	false	false	false	false	false
IMS-10013-CVDP-96BA75CB-EF35-4440-A1BD-DF349E99BE25		RKI	ncov	Human	B.1.1.7	20I (Alpha, V1)	2021-03-02	Europe	Germany	Baden-Württemberg	Landkreis Göppingen	Göppingen	73035	48.7	9.6667		20I (Alpha, V1)	B.1.1.7	false	false	false	false	false	false	false	false	false
IMS-10013-CVDP-EBEDCA18-9454-4FE7-B5B2-003E4EC13605		RKI	ncov	Human	B.1.1.7	20I (Alpha, V1)	2021-04-06	Europe	Germany	Sachsen	Landkreis Nordsachsen	Wermsdorf	4779	51.2833	12.95		20I (Alpha, V1)	B.1.1.7	false	false	false	false	false	false	false	false	false
IMS-10150-CVDP-E0027A94-E35B-4C76-89B3-26789158117F		RKI	ncov	Human	B.1.1.7	20I (Alpha, V1)	2021-05-04	Europe	Germany	Nordrhein-Westfalen	Landkreis Leverkusen; Stadt	Leverkusen	51375	51.0331	7.052		20I (Alpha, V1)	B.1.1.7	false	false	false	false	false	false	false	false	false
IMS-10020-CVDP-088CC898-0488-40DC-B095-C06C8108439D		RKI	ncov	Human	B.1.1.7	20I (Alpha, V1)	2021-04-08	Europe	Germany	Rheinland-Pfalz	Landkreis Trier; kreisfreie Stadt	Trier	54290	49.7537	6.6393		20I (Alpha, V1)	B.1.1.7	false	false	false	false	false	false	false	false	false
IMS-10020-CVDP-682AFFCB-E769-4FE5-83C6-8B30F756DB31		RKI	ncov	Human	B.1.1.7	20I (Alpha, V1)	2021-03-31	Europe	Germany	Baden-Württemberg	Landkreis Esslingen	Leinfelden-Echterdingen	70771	48.6941	9.1681		20I (Alpha, V1)	B.1.1.7	false	false	false	false	false	false	false	false	false
IMS-10587-CVDP-7062863F-6D50-4211-B190-ED272C77AAAA		RKI	ncov	Human	B.1.1.7	20I (Alpha, V1)	2021-03-31	Europe	Germany	Hamburg	Landkreis Hamburg; Freie und Hansestadt	Hamburg	20095	53.5722	10.0031		20I (Alpha, V1)	B.1.1.7	false	false	false	false	false	false	false	false	false
IMS-10209-CVDP-B791B9E8-7C39-4A50-87FA-8F5C73066E29		RKI	ncov	Human	B.1.1.7	20I (Alpha, V1)	2021-04-05	Europe	Germany	Baden-Württemberg	Landkreis Konstanz	Konstanz	78467	47.6744	9.1649		20I (Alpha, V1)	B.1.1.7	false	false	false	false	false	false	false	false	false
IMS-10013-CVDP-61B4D2F6-F137-4DFD-8D20-EBDAF3B23745		RKI	ncov	Human	B.1.1.7	20I (Alpha, V1)	2021-03-18	Europe	Germany	Bayern	Kreisfreie Stadt München	München	81737	48.1098	11.6183		20I (Alpha, V1)	B.1.1.7	false	false	false	false	false	false	false	false	false
IMS-10036-CVDP-383D7F0F-DAF5-48CF-B98A-D47F8475992F		RKI	ncov	Human	B.1.1.7	20I (Alpha, V1)	2021-04-14	Europe	Germany	Brandenburg	Landkreis Frankfurt (Oder)	Frankfurt (Oder)	15230	52.3475	14.5539		20I (Alpha, V1)	B.1.1.7	false	false	false	false	false	false	false	false	false
IMS-10117-CVDP-A4F5AFB1-E5FB-4389-B2F0-4A2EB344AF73		RKI	ncov	Human	B.1.1.7	20I (Alpha, V1)	2021-03-25	Europe	Germany	Nordrhein-Westfalen	Landkreis Leverkusen; Stadt	Leverkusen	51375	51.0331	7.052		20I (Alpha, V1)	B.1.1.7	false	false	false	false	false	false	false	false	false
IMS-10004-CVDP-CF4FA696-8B96-49D3-B122-53251A7D976F		RKI	ncov	Human	B.1.1.7	20I (Alpha, V1)	2021-04-20	Europe	Germany	Schleswig-Holstein	Kreis Herzogtum Lauenburg	Kreis Herzogtum Lauenburg	21502	53.5966	10.5762		20I (Alpha, V1)	B.1.1.7	false	false	false	false	false	false	false	false	true
IMS-10261-CVDP-F39EAA71-FCFF-49E4-8087-801F44B3AE82		RKI	ncov	Human	B.1.1.7	20I (Alpha, V1)	2021-05-02	Europe	Germany	Nordrhein-Westfalen	Landkreis Lippe	Bad Salzuflen	32105	52.0808	8.7505		20I (Alpha, V1)	B.1.1.7	false	false	false	false	false	false	false	false	false
IMS-10116-CVDP-335FFCBB-1111-410C-B085-5F60E418E00A		RKI	ncov	Human	B.1.1.7	20I (Alpha, V1)	2021-02-19	Europe	Germany	Nordrhein-Westfalen	Landkreis Essen; Stadt	Essen	45326	51.4844	7.005		20I (Alpha, V1)	B.1.1.7	false	false	false	false	false	false	false	false	false
IMS-10327-CVDP-395D4FA6-1913-48FD-B01A-B4353BBD3798		RKI	ncov	Human	B.1.1.7	20I (Alpha, V1)	2021-02-24	Europe	Germany	Bayern	Landkreis Ingolstadt	Ingolstadt	85051	48.7212	11.4096		20I (Alpha, V1)	B.1.1.7	false	false	false	false	false	false	false	false	false
IMS-10020-CVDP-65223A07-6E2C-4107-8C64-48990762D977		RKI	ncov	Human	B.1.1.7	20I (Alpha, V1)	2021-02-22	Europe	Germany	Bayern	Landkreis Weiden i.d.OPf.	Weiden	92637	49.6768	12.1561		20I (Alpha, V1)	B.1.1.7	false	false	false	false	false	false	false	false	false
IMS-10013-CVDP-7D761049-8AF3-4F7C-82A6-30891C9DDB54		RKI	ncov	Human	B.1.1.7	20I (Alpha, V1)	2021-04-24	Europe	Germany	Hessen	Landkreis Kassel; documenta-Stadt	Kassel	34119	51.3152	9.4647		20I (Alpha, V1)	B.1.1.7	false	false	false	false	false	false	false	false	false
6166ba5b81e18c1c41cecc42	1091313143	IIMK	ncov	Human	B.1.1.7	20I (Alpha, V1)	2021-03-31	Europe	Germany	Thuringia	Landkreis Ilm-Kreis	Arnstadt	99310	50.8343	10.9456	48	20I (Alpha, V1)	B.1.1.7	false	false	false	false	false	false	false	false	false
IMS-10150-CVDP-D4B0AA83-F07C-4A30-AFE7-CFAF700C71FD		RKI	ncov	Human	B.1.1.7	20I (Alpha, V1)	2021-04-30	Europe	Germany	Rheinland-Pfalz	Landkreis Trier; kreisfreie Stadt	Trier	54290	49.7537	6.6393		20I (Alpha, V1)	B.1.1.7	false	false	false	false	false	false	true	false	false
IMS-10020-CVDP-6B68864C-EB1D-4003-B347-829DC3B61DF5		RKI	ncov	Human	B.1.1.7	20I (Alpha, V1)	2021-02-26	Europe	Germany	Bayern	Landkreis Weiden i.d.OPf.	Weiden	92637	49.6768	12.1561		20I (Alpha, V1)	B.1.1.7	false	false	false	false	false	false	false	false	false
IMS-10150-CVDP-FFC4A4FC-22B6-4D1A-9471-3F4A4E1FAAAD		RKI	ncov	Human	B.1.1.7	20I (Alpha, V1)	2021-04-23	Europe	Germany	Nordrhein-Westfalen	Landkreis Leverkusen; Stadt	Leverkusen	51375	51.0331	7.052		20I (Alpha, V1)	B.1.1.7	false	false	false	false	false	false	false	false	false
IMS-10218-CVDP-1B013872-83F5-4DE3-84D2-3C7BE3832D3F		RKI	ncov	Human	B.1.1.7	20I (Alpha, V1)	2021-03-10	Europe	Germany	Sachsen-Anhalt	Landkreis Landeshauptstadt Magdeburg	Magdeburg	39104	52.1243	11.6322		20I (Alpha, V1)	B.1.1.7	false	false	false	false	false	false	false	false	false
IMS-10020-CVDP-B0A5934B-E9FF-4E31-8A19-CDCC82F69F20		RKI	ncov	Human	B.1.1.7	20I (Alpha, V1)	2021-04-14	Europe	Germany	Rheinland-Pfalz	Landkreis Trier; kreisfreie Stadt	Trier	54290	49.7537	6.6393		20I (Alpha, V1)	B.1.1.7	false	false	false	false	false	false	false	false	false
IMS-10294-CVDP-6E91EC0D-A912-46C6-B16C-8C9E2FA43A98		RKI	ncov	Human	B.1.1.7	20I (Alpha, V1)	2021-05-06	Europe	Germany	Nordrhein-Westfalen	Landkreis Düsseldorf; Stadt	Düsseldorf	40477	51.2371	6.7795		20I (Alpha, V1)	B.1.1.7	false	false	false	false	false	false	false	false	false
IMS-10117-CVDP-AC8B8CB7-2FD5-43E8-8D0B-C555AA8D921F		RKI	ncov	Human	B.1.1.7	20I (Alpha, V1)	2021-04-28	Europe	Germany	Baden-Württemberg	Landkreis Rhein-Neckar-Kreis	Eppelheim	69214	49.4019	8.6364		20I (Alpha, V1)	B.1.1.7	false	false	false	false	false	false	false	false	false
6166b85c81e18c1c41cec6d9	IMS-10013-CVDP-c2314960-b4f2-49ac-bd98-3f6a08539d81	IIMK	ncov	Human	B.1.1.7	20I (Alpha, V1)	2021-03-30	Europe	Germany	Thuringia	Landkreis Jena; Stadt	Jena	7751	50.9283	11.5853	30	20I (Alpha, V1)	B.1.1.7	false	false	false	false	false	false	false	false	false
IMS-10117-CVDP-6C22EE48-BD29-477E-8A9F-D4337446105A		RKI	ncov	Human	B.1.1.7	20I (Alpha, V1)	2021-03-29	Europe	Germany	Baden-Württemberg	Landkreis Karlsruhe	Ettlingen	76275	48.9409	8.4076		20I (Alpha, V1)	Q.7	false	false	false	false	false	false	false	false	false
IMS-10146-CVDP-40B8C9EC-3529-4F7C-9BB3-2922847F73B7		RKI	ncov	Human	B.1.1.7	20I (Alpha, V1)	2021-03-05	Europe	Germany	Baden-Württemberg	Landkreis Ulm; Stadt	Ulm	89073	48.4015	9.9927		20I (Alpha, V1)	B.1.1.7	false	false	false	false	false	false	false	false	false
IMS-10375-CVDP-F7870FE0-ADCD-4276-AB17-2F1A651F4ED8		RKI	ncov	Human	B.1.1.7	20I (Alpha, V1)	2021-02-05	Europe	Germany	Baden-Württemberg	Landkreis Mannheim	Mannheim	68167	49.4996	8.4939		20I (Alpha, V1)	B.1.1.7	false	false	false	false	false	false	false	false	false
IMS-10033-CVDP-BE286375-12C3-4DC4-AD63-724E10F6B0C0		RKI	ncov	Human	B.1.1.7	20I (Alpha, V1)	2021-03-19	Europe	Germany	Berlin	Landkreis Berlin; Stadt	Berlin	13353	52.5416	13.3495		20I (Alpha, V1)	B.1.1.7	false	false	false	false	false	false	false	false	false
IMS-10218-CVDP-38958474-29FB-4C21-B693-E845D20E91DE		RKI	ncov	Human	B.1.1.7	20I (Alpha, V1)	2021-03-01	Europe	Germany	Sachsen-Anhalt	Landkreis Landeshauptstadt Magdeburg	Magdeburg	39104	52.1243	11.6322		20I (Alpha, V1)	B.1.1.7	false	false	false	false	false	false	false	false	false
IMS-10013-CVDP-A9A6BF8E-D606-43BB-9F33-B851E6582F71		RKI	ncov	Human	B.1.1.7	20I (Alpha, V1)	2021-03-08	Europe	Germany	Saarland	Landkreis Saarpfalz-Kreis	Sankt Ingbert	66386	49.277	7.1167		20I (Alpha, V1)	B.1.1.7	false	false	false	false	false	false	false	false	false
IMS-10004-CVDP-EB461F3F-72D7-4A5D-A28D-D11DC23CA358		RKI	ncov	Human	B.1.1.7	20I (Alpha, V1)	2021-03-18	Europe	Germany	Schleswig-Holstein	Kreis Herzogtum Lauenburg	Kreis Herzogtum Lauenburg	21502	53.5966	10.5762		20I (Alpha, V1)	B.1.1.7	false	false	false	false	false	false	false	false	false
IMS-10334-CVDP-582ACEE2-31C3-46BF-8A03-05EFED233616		RKI	ncov	Human	B.1.1.7	20I (Alpha, V1)	2021-03-08	Europe	Germany	Brandenburg	Kreisfreie Stadt Cottbus	Cottbus	3048	51.7403	14.3198		20I (Alpha, V1)	B.1.1.7	false	false	false	false	false	false	false	false	false
IMS-10150-CVDP-FA4E404C-2916-47F8-B7BF-168487AAC05E		RKI	ncov	Human	B.1.1.7	20I (Alpha, V1)	2021-04-27	Europe	Germany	Rheinland-Pfalz	Landkreis Trier; kreisfreie Stadt	Trier	54290	49.7537	6.6393		20I (Alpha, V1)	B.1.1.7	false	false	false	false	false	false	false	false	false
IMS-10020-CVDP-188E03F6-4DAC-4BCC-8D59-783663A6F651		RKI	ncov	Human	B.1.1.7	20I (Alpha, V1)	2021-03-26	Europe	Germany	Bayern	Landkreis Weiden i.d.OPf.	Weiden	92637	49.6768	12.1561		20I (Alpha, V1)	B.1.1.7	false	false	false	false	false	false	false	false	false
IMS-10146-CVDP-A55A68F9-D4B8-4131-8754-E0815AF29E48		RKI	ncov	Human	B.1.1.7	20I (Alpha, V1)	2021-04-16	Europe	Germany	Baden-Württemberg	Landkreis Ulm; Stadt	Ulm	89073	48.4015	9.9927		20I (Alpha, V1)	Q.7	false	false	false	false	false	false	false	false	false
IMS-10375-CVDP-40969592-0AB8-460A-A787-A70BFE2A8540		RKI	ncov	Human	B.1.1.7	20I (Alpha, V1)	2021-03-09	Europe	Germany	Baden-Württemberg	Landkreis Heidelberg	Heidelberg	69120	49.4169	8.6764		20I (Alpha, V1)	B.1.1.7	false	false	false	false	false	false	false	false	false
IMS-10117-CVDP-D6275DAD-5463-464C-9D09-07048AFFD61A		RKI	ncov	Human	B.1.1.7	20I (Alpha, V1)	2021-03-05	Europe	Germany	Baden-Württemberg	Landkreis Karlsruhe	Ettlingen	76275	48.9409	8.4076		20I (Alpha, V1)	B.1.1.7	false	false	false	false	false	false	false	false	false
IMS-10116-CVDP-B2FABE67-2EA1-4286-8B67-562915A57780		RKI	ncov	Human	B.1.1.7	20I (Alpha, V1)	2021-04-01	Europe	Germany	Sachsen	Kreisfreie Stadt Dresden	Dresden	1067	51.0628	13.7297		20I (Alpha, V1)	B.1.1.7	false	false	false	false	false	false	false	false	false
IMS-10013-CVDP-7CB7B251-2B80-4F1F-B263-843EC25D9467		RKI	ncov	Human	B.1.1.7	20I (Alpha, V1)	2021-04-10	Europe	Germany	Sachsen	Landkreis Nordsachsen	Wermsdorf	4779	51.2833	12.95		20I (Alpha, V1)	B.1.1.7	false	false	false	false	false	false	false	false	false
IMS-10087-CVDP-5802D757-E0B4-45D8-AF80-3D6096281A18		RKI	ncov	Human	B.1.1.7	20I (Alpha, V1)	2021-03-27	Europe	Germany	Nordrhein-Westfalen	Landkreis Köln; Stadt	Köln	50858	50.9243	6.8565		20I (Alpha, V1)	B.1.1.7	false	false	false	false	false	false	false	false	false
IMS-10338-CVDP-9259E3AF-FE01-4BEC-B705-14A562808F71		RKI	ncov	Human	B.1.1.7	20I (Alpha, V1)	2021-04-08	Europe	Germany	Hessen	Landkreis Frankfurt am Main; Stadt	Frankfurt am Main	60327	50.1038	8.6522		20I (Alpha, V1)	B.1.1.7	false	false	false	false	false	false	false	false	false
IMS-10122-CVDP-246826AB-90DB-4CD9-9B99-664A3368C5E8		RKI	ncov	Human	B.1.1.7	20I (Alpha, V1)	2021-02-26	Europe	Germany	Baden-Württemberg	Landkreis Karlsruhe	Karlsruhe	76131	49.0078	8.4199		20I (Alpha, V1)	B.1.1.7	false	false	false	false	false	false	false	false	false
IMS-10020-CVDP-7804081A-99F3-49DB-8D5A-75E6D9E45BD1		RKI	ncov	Human	B.1.1.7	20I (Alpha, V1)	2021-04-02	Europe	Germany	Baden-Württemberg	Landkreis Esslingen	Leinfelden-Echterdingen	70771	48.6941	9.1681		20I (Alpha, V1)	Q.7	false	false	false	false	false	false	false	false	false
IMS-10370-CVDP-A866A183-A5CC-4818-BFEF-3DB76355386F		RKI	ncov	Human	B.1.1.7	20I (Alpha, V1)	2021-04-10	Europe	Germany	Brandenburg	Kreisfreie Stadt Potsdam	Potsdam	14467	52.403	13.0626		20I (Alpha, V1)	B.1.1.7	false	false	false	false	false	false	false	false	false
IMS-10116-CVDP-71963A54-BA44-4E40-85ED-9DE01FAF9186		RKI	ncov	Human	B.1.1.7	20I (Alpha, V1)	2021-05-03	Europe	Germany	Nordrhein-Westfalen	Landkreis Mönchengladbach; Stadt	Mönchengladbach	41169	51.2	6.4333		20I (Alpha, V1)	B.1.1.7	false	false	false	false	false	false	false	false	false
6166ba5c81e18c1c41cedf73	5002425855	IIMK	ncov	Human	B.1.1.7	20I (Alpha, V1)	2021-04-01	Europe	Germany	Thuringia	Landkreis Altenburger Land	Altenburg	4600	50.9851	12.4332	1439	20I (Alpha, V1)	B.1.1.7	true	false	false	false	false	false	false	false	false
IMS-10020-CVDP-D0463BDD-CE26-42CC-80F4-B929DD1311DB		RKI	ncov	Human	B.1.1.7	20I (Alpha, V1)	2021-04-15	Europe	Germany	Baden-Württemberg	Landkreis Esslingen	Leinfelden-Echterdingen	70771	48.6941	9.1681		20I (Alpha, V1)	B.1.1.7	false	false	false	false	false	false	false	false	false
IMS-10023-CVDP-DCDDAC52-C962-4717-9B08-0778868556EE		RKI	ncov	Human	B.1.1.7	20I (Alpha, V1)	2021-02-24	Europe	Germany	Sachsen	Landkreis Erzgebirgskreis	Neukirchen/Erzgebirge	9221	50.7835	12.87		20I (Alpha, V1)	B.1.1.7	false	false	false	false	false	false	false	false	false
IMS-10020-CVDP-7B46A7D0-D5EE-4D0E-B52A-307BC91D1CB0		RKI	ncov	Human	B.1.1.7	20I (Alpha, V1)	2021-03-05	Europe	Germany	Berlin	Landkreis Berlin; Stadt	Berlin	10829	52.4761	13.3607		20I (Alpha, V1)	B.1.1.7	false	false	false	false	false	false	false	false	false
IMS-10013-CVDP-F67914C3-B988-46D1-BA6D-B7314D3E6CD2		RKI	ncov	Human	B.1.1.7	20I (Alpha, V1)	2021-02-25	Europe	Germany	Sachsen	Landkreis Nordsachsen	Wermsdorf	4779	51.2833	12.95		20I (Alpha, V1)	B.1.1.7	false	false	false	false	false	false	false	false	false
IMS-10013-CVDP-B85BAB8D-88FB-4B01-B4A5-843526DE6FF3		RKI	ncov	Human	B.1.1.7	20I (Alpha, V1)	2021-02-12	Europe	Germany	Bayern	Kreisfreie Stadt München	München	81737	48.1098	11.6183		20I (Alpha, V1)	B.1.1.7	false	false	false	false	false	false	false	false	false
IMS-10013-CVDP-10FE6168-1EBA-4806-9D4C-E178EB12D274		RKI	ncov	Human	B.1.1.7	20I (Alpha, V1)	2021-03-19	Europe	Germany	Hamburg	Landkreis Hamburg; Freie und Hansestadt	Hamburg	21079	53.5722	10.0031		20I (Alpha, V1)	B.1.1.7	false	false	false	false	false	false	false	false	false
6166ba5b81e18c1c41cecbbd	1024083254	IIMK	ncov	Human	B.1.1.7	20I (Alpha, V1)	2021-03-30	Europe	Germany	Thuringia	Landkreis Kyffhäuserkreis	Greußen	99718	51.2286	10.9491	60	20I (Alpha, V1)	B.1.1.7	false	false	false	false	false	false	false	false	true
IMS-10020-CVDP-11ECFD49-C0E7-4057-B4DD-D2F52976D6D3		RKI	ncov	Human	B.1.1.7	20I (Alpha, V1)	2021-04-12	Europe	Germany	Baden-Württemberg	Landkreis Esslingen	Leinfelden-Echterdingen	70771	48.6941	9.1681		20I (Alpha, V1)	B.1.1.7	false	false	false	false	false	false	false	false	false
IMS-10209-CVDP-7F91A0C8-1C53-451D-9A66-41B5777B3191		RKI	ncov	Human	B.1.1.7	20I (Alpha, V1)	2021-02-25	Europe	Germany	Baden-Württemberg	Landkreis Konstanz	Konstanz	78467	47.6744	9.1649		20I (Alpha, V1)	B.1.1.7	false	false	false	false	false	false	false	false	false
IMS-10020-CVDP-A7A7E292-A2B5-4CCF-B5EE-4FB29E2CE796		RKI	ncov	Human	B.1.1.7	20I (Alpha, V1)	2021-02-22	Europe	Germany	Baden-Württemberg	Landkreis Karlsruhe	Ettlingen	76275	48.9409	8.4076		20I (Alpha, V1)	B.1.1.7	false	false	false	false	false	false	false	false	false
IMS-10296-CVDP-08B8AA55-5966-40B2-B435-D253838104D4		RKI	ncov	Human	B.1.1.7	20I (Alpha, V1)	2021-02-16	Europe	Germany	Hessen	Landkreis Gießen	Gießen	35392	50.5669	8.6538		20I (Alpha, V1)	B.1.1.7	false	false	false	false	false	false	false	false	false
IMS-10261-CVDP-C1E4AC44-5A50-4367-B780-A789E397AD48		RKI	ncov	Human	B.1.1.7	20I (Alpha, V1)	2021-02-18	Europe	Germany	Nordrhein-Westfalen	Landkreis Lippe	Bad Salzuflen	32105	52.0808	8.7505		20I (Alpha, V1)	B.1.1.7	false	false	false	false	false	false	false	false	false
6166b85c81e18c1c41cec603	IMS-10013-CVDP-38bf4aeb-af79-4318-8a34-fe279fa87c9e	IIMK	ncov	Human	B.1.1.7	20I (Alpha, V1)	2021-03-10	Europe	Germany	Thuringia	Landkreis Greiz	Bad Köstritz	7586	50.9301	12.0118	17	20I (Alpha, V1)	B.1.1.7	false	false	false	false	false	false	false	true	false
IMS-10338-CVDP-29FD4E4B-345A-4D92-8C46-80F154B53B28		RKI	ncov	Human	B.1.1.7	20I (Alpha, V1)	2021-03-23	Europe	Germany	Hessen	Landkreis Frankfurt am Main; Stadt	Frankfurt am Main	60327	50.1038	8.6522		20I (Alpha, V1)	B.1.1.7	false	false	false	false	false	false	false	false	false
6166ba5b81e18c1c41cecb34	1024587983	IIMK	ncov	Human	B.1.1.7	20I (Alpha, V1)	2021-05-07	Europe	Germany	Thuringia	Landkreis Eichsfeld	Leinefelde	37327	51.3887	10.3268	76	20I (Alpha, V1)	B.1.1.7	false	false	false	false	false	false	false	false	false
6166ba5b81e18c1c41ced020	1091322677	IIMK	ncov	Human	B.1.1.7	20I (Alpha, V1)	2021-04-09	Europe	Germany	Thuringia	Landkreis Unstrut-Hainich-Kreis	Bad Langensalza	99947	51.1089	10.6475	151	20I (Alpha, V1)	B.1.1.7	false	false	false	false	false	false	false	false	false
IMS-10122-CVDP-C0A7741B-852D-4B13-91E5-150DE1ABEC74		RKI	ncov	Human	B.1.1.7	20I (Alpha, V1)	2021-03-09	Europe	Germany	Baden-Württemberg	Landkreis Karlsruhe	Karlsruhe	76131	49.0078	8.4199		20I (Alpha, V1)	B.1.1.7	false	false	false	false	false	false	false	false	false
IMS-10087-CVDP-A447D1F5-1EDB-4D31-BC05-C53EFB63750B		RKI	ncov	Human	B.1.1.7	20I (Alpha, V1)	2021-03-05	Europe	Germany	Nordrhein-Westfalen	Landkreis Köln; Stadt	Köln	50858	50.9243	6.8565		20I (Alpha, V1)	B.1.1.7	false	false	false	false	false	false	false	false	false
IMS-10116-CVDP-00D00294-D423-4B9D-A57F-85FA7329106E		RKI	ncov	Human	B.1.1.7	20I (Alpha, V1)	2021-02-02	Europe	Germany	Berlin	Landkreis Berlin; Stadt	Berlin	13407	52.5727	13.3512		20I (Alpha, V1)	B.1.1.7	false	false	false	false	false	false	false	false	false
IMS-10215-CVDP-F85E263D-D136-4AEF-91D4-04C51EC23F3A		RKI	ncov	Human	B.1.1.7	20I (Alpha, V1)	2021-03-27	Europe	Germany	Sachsen	Kreisfreie Stadt Leipzig	Leipzig	4103	51.3405	12.3827		20I (Alpha, V1)	B.1.1.7	false	false	false	false	false	false	false	false	false
IMS-10020-CVDP-9412F27C-967C-407E-BD97-12DEBDA95668		RKI	ncov	Human	B.1.1.7	20I (Alpha, V1)	2021-04-08	Europe	Germany	Rheinland-Pfalz	Landkreis Trier; kreisfreie Stadt	Trier	54290	49.7537	6.6393		20I (Alpha, V1)	B.1.1.7	false	false	false	false	false	false	false	false	false
IMS-10020-CVDP-86435F6E-7121-4C7A-98B8-8AD5B96C287D		RKI	ncov	Human	B.1.1.7	20I (Alpha, V1)	2021-03-18	Europe	Germany	Rheinland-Pfalz	Landkreis Trier; kreisfreie Stadt	Trier	54290	49.7537	6.6393		20I (Alpha, V1)	B.1.1.7	false	false	false	false	false	false	false	false	false
IMS-10117-CVDP-3B059DAD-03BF-4DC2-BBA8-103F4E1B5FD7		RKI	ncov	Human	B.1.1.7	20I (Alpha, V1)	2021-03-17	Europe	Germany	Baden-Württemberg	Landkreis Rhein-Neckar-Kreis	Eppelheim	69214	49.4019	8.6364		20I (Alpha, V1)	B.1.1.7	false	false	false	false	false	false	false	false	false
IMS-10294-CVDP-53045885-002D-4126-805A-90D3C2B0E9A9		RKI	ncov	Human	B.1.1.7	20I (Alpha, V1)	2021-04-14	Europe	Germany	Nordrhein-Westfalen	Landkreis Düsseldorf; Stadt	Düsseldorf	40210	51.2216	6.7897		20I (Alpha, V1)	B.1.1.7	false	false	false	false	false	false	false	false	false
6166ba5b81e18c1c41cecef8	1091319930	IIMK	ncov	Human	B.1.1.7	20I (Alpha, V1)	2021-04-07	Europe	Germany	Thuringia	Landkreis Ilm-Kreis	Arnstadt	99310	50.8343	10.9456	1077	20I (Alpha, V1)	B.1.1.7	false	false	false	false	false	false	false	false	false
6166ba5b81e18c1c41ced505	1091336335	IIMK	ncov	Human	B.1.1.7	20I (Alpha, V1)	2021-04-23	Europe	Germany	Thuringia	Landkreis Weimar; Stadt	Weimar	99423	50.9803	11.3272	133	20I (Alpha, V1)	B.1.1.7	false	false	false	false	false	false	false	false	false
IMS-10020-CVDP-D06C8DFE-9070-4C23-9402-800DE7052F64		RKI	ncov	Human	B.1.1.7	20I (Alpha, V1)	2021-04-10	Europe	Germany	Berlin	Landkreis Berlin; Stadt	Berlin	10829	52.4761	13.3607		20I (Alpha, V1)	B.1.1.7	false	false	false	false	false	false	false	false	false
IMS-10013-CVDP-4B68A865-E3C2-4D85-99B1-9EEC12588A87		RKI	ncov	Human	B.1.1.7	20I (Alpha, V1)	2021-03-26	Europe	Germany	Sachsen	Landkreis Nordsachsen	Wermsdorf	4779	51.2833	12.95		20I (Alpha, V1)	B.1.1.7	false	false	false	false	false	false	false	false	false
IMS-10004-CVDP-00151		RKI	ncov	Human	B.1.1.7	20I (Alpha, V1)	2021-01-28	Europe	Germany	Schleswig-Holstein	Kreis Herzogtum Lauenburg	Kreis Herzogtum Lauenburg	21502	53.5966	10.5762		20I (Alpha, V1)	B.1.1.7	false	false	false	false	false	false	false	false	false
IMS-10122-CVDP-96234B47-F421-497C-AE7B-194C543DE63B		RKI	ncov	Human	B.1.1.7	20I (Alpha, V1)	2021-04-24	Europe	Germany	Brandenburg	Kreisfreie Stadt Cottbus	Cottbus	3050	51.7324	14.3347		20I (Alpha, V1)	B.1.1.7	false	false	false	false	false	false	false	false	false
IMS-10587-CVDP-CCF90F92-9B4C-4759-B724-DC329AE83483		RKI	ncov	Human	B.1.1.7	20I (Alpha, V1)	2021-03-19	Europe	Germany	Hamburg	Landkreis Hamburg; Freie und Hansestadt	Hamburg	20095	53.5722	10.0031		20I (Alpha, V1)	B.1.1.7	false	false	false	false	false	false	false	false	false
IMS-10186-CVDP-3C56BBB6-E238-439D-8935-341A52BEC3A7		RKI	ncov	Human	B.1.1.7	20I (Alpha, V1)	2021-03-25	Europe	Germany	Nordrhein-Westfalen	Landkreis Düsseldorf; Stadt	Düsseldorf	40210	51.2216	6.7897		20I (Alpha, V1)	B.1.1.7	false	false	false	false	false	false	false	false	false
IMS-10013-CVDP-5284B437-ECF6-43AB-913F-D94FBC28B217		RKI	ncov	Human	B.1.1.7	20I (Alpha, V1)	2021-04-07	Europe	Germany	Sachsen	Landkreis Meißen	Landkreis Meißen	1665	51.2393	13.4717		20I (Alpha, V1)	B.1.1.7	false	false	false	false	false	false	false	false	false
IMS-10150-CVDP-F68F43AC-6E7B-4183-9513-C3C30A0E74B7		RKI	ncov	Human	B.1.1.7	20I (Alpha, V1)	2021-04-22	Europe	Germany	Rheinland-Pfalz	Landkreis Trier; kreisfreie Stadt	Trier	54290	49.7537	6.6393		20I (Alpha, V1)	B.1.1.7	false	false	false	false	false	false	false	false	false
IMS-10122-CVDP-C3D5784E-70B3-4B53-9C2D-0803A7CEB086		RKI	ncov	Human	B.1.1.7	20I (Alpha, V1)	2021-04-21	Europe	Germany	Bayern	Schweinfurt; Stadt	Schweinfurt	97422	50.0545	10.2441		20I (Alpha, V1)	B.1.1.7	false	false	false	false	false	false	false	false	false
IMS-10186-CVDP-64E1EA2E-6F06-4E32-BD82-F9C3BE85937F		RKI	ncov	Human	B.1.1.7	20I (Alpha, V1)	2021-04-07	Europe	Germany	Nordrhein-Westfalen	Landkreis Düsseldorf; Stadt	Düsseldorf	40210	51.2216	6.7897		20I (Alpha, V1)	B.1.1.7	false	false	false	false	false	false	false	false	false
IMS-10122-CVDP-2923F47F-F284-42D8-AC18-4CC43D6941E3		RKI	ncov	Human	B.1.1.7	20I (Alpha, V1)	2021-03-31	Europe	Germany	Baden-Württemberg	Landkreis Karlsruhe	Karlsruhe	76131	49.0078	8.4199		20I (Alpha, V1)	B.1.1.7	false	false	false	false	false	false	false	false	false
IMS-10122-CVDP-57A55D7F-7F07-40DA-85F5-1694B9BFB1D9		RKI	ncov	Human	B.1.1.7	20I (Alpha, V1)	2021-03-29	Europe	Germany	Baden-Württemberg	Landkreis Karlsruhe	Karlsruhe	76131	49.0078	8.4199		20I (Alpha, V1)	B.1.1.7	false	false	false	false	false	false	false	false	false
IMS-10025-CVDP-01028		RKI	ncov	Human	B.1.1.7	20I (Alpha, V1)	2021-02-11	Europe	Germany	Berlin	Landkreis Berlin; Stadt	Berlin	10409	52.5443	13.4414		20I (Alpha, V1)	B.1.1.7	false	false	false	false	false	false	false	false	false
IMS-10087-CVDP-6EB6E9BF-A4C9-4E3E-BEEC-6843FA974A32		RKI	ncov	Human	B.1.1.7	20I (Alpha, V1)	2021-02-28	Europe	Germany	Nordrhein-Westfalen	Landkreis Köln; Stadt	Köln	50858	50.9243	6.8565		20I (Alpha, V1)	B.1.1.7	false	false	false	false	false	false	false	false	false
IMS-10020-CVDP-79CFA55B-0173-4EC6-9BB9-C90CCF59F750		RKI	ncov	Human	B.1.1.7	20I (Alpha, V1)	2021-02-15	Europe	Germany	Bayern	Landkreis Weiden i.d.OPf.	Weiden	92637	49.6768	12.1561		20I (Alpha, V1)	B.1.1.7	false	false	false	false	false	false	false	false	false
IMS-10013-CVDP-2F268AC6-A4B0-48ED-9282-F108A461DCA8		RKI	ncov	Human	B.1.1.7	20I (Alpha, V1)	2021-04-03	Europe	Germany	Sachsen	Landkreis Nordsachsen	Wermsdorf	4779	51.2833	12.95		20I (Alpha, V1)	B.1.1.7	false	false	false	false	false	false	false	false	false
IMS-10261-CVDP-1242FC32-8582-457D-9D4D-CB504B6D857E		RKI	ncov	Human	B.1.1.7	20I (Alpha, V1)	2021-02-22	Europe	Germany	Nordrhein-Westfalen	Landkreis Lippe	Bad Salzuflen	32105	52.0808	8.7505		20I (Alpha, V1)	B.1.1.7	false	false	false	false	false	false	false	false	false
IMS-10087-CVDP-6E3184F0-FD37-4EB5-9058-0E3E6D4573FB		RKI	ncov	Human	B.1.1.7	20I (Alpha, V1)	2021-04-23	Europe	Germany	Nordrhein-Westfalen	Landkreis Köln; Stadt	Köln	50858	50.9243	6.8565		20I (Alpha, V1)	B.1.1.7	false	false	false	false	false	false	false	false	false
IMS-10004-CVDP-E41B5A61-0A6D-4E03-BACC-B31043DDA0F4		RKI	ncov	Human	B.1.1.7	20I (Alpha, V1)	2021-04-20	Europe	Germany	Schleswig-Holstein	Kreis Herzogtum Lauenburg	Kreis Herzogtum Lauenburg	21502	53.5966	10.5762		20I (Alpha, V1)	B.1.1.7	false	false	false	false	false	false	false	false	false
IMS-10023-CVDP-ED6A579F-D301-4506-A7E3-E085838C1C80		RKI	ncov	Human	B.1.1.7	20I (Alpha, V1)	2021-02-11	Europe	Germany	Sachsen	Landkreis Erzgebirgskreis	Neukirchen/Erzgebirge	9221	50.7835	12.87		20I (Alpha, V1)	B.1.1.7	false	false	false	false	false	false	false	false	false
IMS-10013-CVDP-7D6E987F-CD32-49E5-9F56-AF36AD93C7E2		RKI	ncov	Human	B.1.1.7	20I (Alpha, V1)	2021-04-23	Europe	Germany	Sachsen	Landkreis Nordsachsen	Wermsdorf	4779	51.2833	12.95		20I (Alpha, V1)	B.1.1.7	false	false	false	false	false	false	false	false	false
IMS-10215-CVDP-4A97A9D4-876D-47B9-AC03-FDB5F9991617		RKI	ncov	Human	B.1.1.7	20I (Alpha, V1)	2021-04-18	Europe	Germany	Sachsen	Kreisfreie Stadt Leipzig	Leipzig	4103	51.3405	12.3827		20I (Alpha, V1)	B.1.1.7	false	false	false	false	false	false	false	false	false
IMS-10298-CVDP-3DB48D94-C7CE-40B0-B040-AF9EBE49D7EA		RKI	ncov	Human	B.1.1.7	20I (Alpha, V1)	2021-02-24	Europe	Germany	Hamburg	Landkreis Hamburg; Freie und Hansestadt	Hamburg	20359	53.5722	10.0031		20I (Alpha, V1)	B.1.1.7	false	false	false	false	false	false	false	false	false
IMS-10020-CVDP-A1A5427A-BD01-4684-B928-9BA2390B4CF5		RKI	ncov	Human	B.1.1.7	20I (Alpha, V1)	2021-03-03	Europe	Germany	Baden-Württemberg	Landkreis Esslingen	Leinfelden-Echterdingen	70771	48.6941	9.1681		20I (Alpha, V1)	B.1.1.7	false	false	false	false	false	false	false	false	false
6166ba5b81e18c1c41ced36f	1024628695	IIMK	ncov	Human	B.1.1.7	20I (Alpha, V1)	2021-04-20	Europe	Germany	Thuringia	Landkreis Gotha	Tambach-Dietharz	99897	50.7925	10.6157	1	20I (Alpha, V1)	B.1.1.7	false	false	false	false	false	false	false	false	false
IMS-10122-CVDP-BC7720C2-3DE0-4374-A42F-E30C1D2EEB06		RKI	ncov	Human	B.1.1.7	20I (Alpha, V1)	2021-04-20	Europe	Germany	Rheinland-Pfalz	Landkreis Germersheim	Kandel	76870	49.0828	8.1972		20I (Alpha, V1)	B.1.1.7	false	false	false	false	false	false	false	false	false
IMS-10150-CVDP-C387F9BB-FF60-4C39-AB42-D296E11C7F67		RKI	ncov	Human	B.1.1.7	20I (Alpha, V1)	2021-05-06	Europe	Germany	Nordrhein-Westfalen	Landkreis Leverkusen; Stadt	Leverkusen	51375	51.0331	7.052		20I (Alpha, V1)	B.1.1.7	false	false	false	false	false	false	false	false	false
607554cd2531781a6b942672	AN7544	IIMK	ncov	Human	B.1.1.7	20I (Alpha, V1)	2021-04-06	Europe	Germany	Thuringia	Landkreis Sonneberg	Sonneberg	96515	50.3555	11.169	191	20I (Alpha, V1)	B.1.1.7	false	false	false	false	false	false	false	false	false
6166ba5c81e18c1c41ced70a	1091276062	IIMK	ncov	Human	B.1.1.7	20I (Alpha, V1)	2021-02-25	Europe	Germany	Thuringia	Landkreis Erfurt; Stadt	Erfurt	99086	50.9775	11.0251	25	20I (Alpha, V1)	B.1.1.7	false	false	false	false	false	false	false	false	false
IMS-10122-CVDP-240E91B3-A7FE-4CA5-B1C4-D454893D059A		RKI	ncov	Human	B.1.1.7	20I (Alpha, V1)	2021-04-17	Europe	Germany	Baden-Württemberg	Landkreis Karlsruhe	Karlsruhe	76131	49.0078	8.4199		20I (Alpha, V1)	B.1.1.7	false	false	false	false	false	false	false	false	false
IMS-10023-CVDP-AF7D941A-C35E-4F1B-A5DE-9ABD768A2525		RKI	ncov	Human	B.1.1.7	20I (Alpha, V1)	2021-02-02	Europe	Germany	Sachsen	Landkreis Erzgebirgskreis	Neukirchen/Erzgebirge	9221	50.7835	12.87		20I (Alpha, V1)	B.1.1.7	false	false	false	false	false	false	false	false	false
IMS-10013-CVDP-9A58AF72-11A5-4819-B434-4BD9730BCD3B		RKI	ncov	Human	B.1.1.7	20I (Alpha, V1)	2021-01-13	Europe	Germany	Bayern	Bayreuth; Stadt	Bayreuth	95448	49.9474	11.5993		20I (Alpha, V1)	B.1.1.7	false	false	false	false	false	false	false	false	false
IMS-10020-CVDP-E5FEFAA8-4614-458C-9D38-FB0474DA94D9		RKI	ncov	Human	B.1.1.7	20I (Alpha, V1)	2021-04-15	Europe	Germany	Baden-Württemberg	Landkreis Esslingen	Leinfelden-Echterdingen	70771	48.6941	9.1681		20I (Alpha, V1)	B.1.1.7	false	false	false	false	false	false	false	false	false
IMS-10020-CVDP-22A145F1-72E5-4E65-ABCF-570CA1745370		RKI	ncov	Human	B.1.1.7	20I (Alpha, V1)	2021-02-20	Europe	Germany	Bayern	Landkreis Weiden i.d.OPf.	Weiden	92637	49.6768	12.1561		20I (Alpha, V1)	B.1.1.7	false	false	false	false	false	false	false	false	false
IMS-10013-CVDP-BF6D6452-57D9-4920-B8E8-025264C4974C		RKI	ncov	Human	B.1.1.7	20I (Alpha, V1)	2021-02-01	Europe	Germany	Niedersachsen	Landkreis Region Hannover	Hannover	30163	52.3943	9.7475		20I (Alpha, V1)	B.1.1.7	false	false	false	false	false	false	false	false	false
6166ba5b81e18c1c41ced39c	1029350581	IIMK	ncov	Human	B.1.1.7	20I (Alpha, V1)	2021-04-20	Europe	Germany	Thuringia	Landkreis Eichsfeld	Dingelstädt	37351	51.3156	10.3215	0	20I (Alpha, V1)	B.1.1.7	false	false	false	false	false	false	false	false	false
IMS-10150-CVDP-CDB1CBAE-E055-4055-BA76-DFCD9D56F151		RKI	ncov	Human	B.1.1.7	20I (Alpha, V1)	2021-05-04	Europe	Germany	Nordrhein-Westfalen	Landkreis Leverkusen; Stadt	Leverkusen	51375	51.0331	7.052		20I (Alpha, V1)	B.1.1.7	false	false	false	false	false	false	false	false	false
IMS-10013-CVDP-6ECB6746-AA4B-48FA-8320-FD2D7C39E5FD		RKI	ncov	Human	B.1.1.7	20I (Alpha, V1)	2021-03-31	Europe	Germany	Bremen	Kreisfreie Stadt Bremen	Bremen	28357	53.1178	8.8947		20I (Alpha, V1)	B.1.1.7	false	false	false	false	false	false	false	false	false
IMS-10087-CVDP-FF09579A-C2AE-4495-AAA5-44D476C2F461		RKI	ncov	Human	B.1.1.7	20I (Alpha, V1)	2021-03-10	Europe	Germany	Nordrhein-Westfalen	Landkreis Köln; Stadt	Köln	50858	50.9243	6.8565		20I (Alpha, V1)	B.1.1.7	false	false	false	false	false	false	false	false	false
IMS-10213-CVDP-00103		RKI	ncov	Human	B.1.1.7	20I (Alpha, V1)	2021-02-08	Europe	Germany	Sachsen	Kreisfreie Stadt Dresden	Dresden	1067	51.0628	13.7297		20I (Alpha, V1)	B.1.1.7	false	false	false	false	false	false	false	false	false
IMS-10213-CVDP-0AF90D37-2019-4A27-96AA-132143CEE148		RKI	ncov	Human	B.1.1.7	20I (Alpha, V1)	2021-04-12	Europe	Germany	Sachsen	Kreisfreie Stadt Dresden	Dresden	1067	51.0628	13.7297		20I (Alpha, V1)	B.1.1.7	false	false	false	false	false	false	false	false	false
IMS-10020-CVDP-B9FAA5C8-3267-4F6C-8C83-3491B0419BA3		RKI	ncov	Human	B.1.1.7	20I (Alpha, V1)	2021-04-14	Europe	Germany	Nordrhein-Westfalen	Landkreis Leverkusen; Stadt	Leverkusen	51375	51.0331	7.052		20I (Alpha, V1)	B.1.1.7	false	false	false	false	false	false	false	false	false
IMS-10020-CVDP-13AB5795-0C8E-4589-ACB2-3C1DFE69C59D		RKI	ncov	Human	B.1.1.7	20I (Alpha, V1)	2021-04-13	Europe	Germany	Nordrhein-Westfalen	Landkreis Leverkusen; Stadt	Leverkusen	51375	51.0331	7.052		20I (Alpha, V1)	B.1.1.7	false	false	false	false	false	false	false	false	false
IMS-10117-CVDP-5EB31DF2-4954-48A9-AA58-AD4F356D5389		RKI	ncov	Human	B.1.1.7	20I (Alpha, V1)	2021-03-22	Europe	Germany	Baden-Württemberg	Landkreis Karlsruhe	Ettlingen	76275	48.9409	8.4076		20I (Alpha, V1)	B.1.1.7	false	false	false	false	false	false	false	false	false
6166ba5b81e18c1c41cecc8a	1024550674	IIMK	ncov	Human	B.1.1.7	20I (Alpha, V1)	2021-03-30	Europe	Germany	Thuringia	Landkreis Sömmerda	Sömmerda	99610	51.1627	11.1157	188	20I (Alpha, V1)	B.1.1.7	false	false	false	false	false	false	false	false	false
IMS-10020-CVDP-1EFFD418-0220-48CE-8180-1E6676D4A08C		RKI	ncov	Human	B.1.1.7	20I (Alpha, V1)	2021-02-16	Europe	Germany	Baden-Württemberg	Landkreis Karlsruhe	Ettlingen	76275	48.9409	8.4076		20I (Alpha, V1)	Q.7	false	false	false	false	false	false	false	false	false
IMS-10020-CVDP-9B7E66AE-0AF3-4FFC-8258-6F76B7A85643		RKI	ncov	Human	B.1.1.7	20I (Alpha, V1)	2021-03-24	Europe	Germany	Rheinland-Pfalz	Landkreis Trier; kreisfreie Stadt	Trier	54290	49.7537	6.6393		20I (Alpha, V1)	B.1.1.7	false	false	false	false	false	false	false	false	false
IMS-10183-CVDP-1BDAEB0D-13C8-468D-9018-878BD1B39B48		RKI	ncov	Human	B.1.1.7	20I (Alpha, V1)	2021-04-15	Europe	Germany	Hamburg	Landkreis Hamburg; Freie und Hansestadt	Hamburg	22081	53.5722	10.0031		20I (Alpha, V1)	B.1.1.7	false	false	false	false	false	false	false	false	false
60ae17f956085d3a5ffe64b4	vi090322	IIMK	ncov	Human	B.1.1.7	20I (Alpha, V1)	2021-05-21	Europe	Germany	Thuringia	Landkreis Jena; Stadt	Jena	7747	50.9283	11.5853	189	20I (Alpha, V1)	B.1.1.7	false	false	false	false	false	false	false	false	false
IMS-10020-CVDP-F7DDE289-8B53-4A96-9763-6B7F5700EB3E		RKI	ncov	Human	B.1.1.7	20I (Alpha, V1)	2021-03-08	Europe	Germany	Bayern	Landkreis Weiden i.d.OPf.	Weiden	92637	49.6768	12.1561		20I (Alpha, V1)	B.1.1.7	false	false	false	false	false	false	false	false	false
IMS-10116-CVDP-05E47C6B-3831-4AA0-88BB-637D93792A4D		RKI	ncov	Human	B.1.1.7	20I (Alpha, V1)	2021-03-29	Europe	Germany	Baden-Württemberg	Landkreis Heidelberg	Heidelberg	69126	49.3757	8.6911		20I (Alpha, V1)	Q.7	false	false	false	false	false	false	false	false	false
IMS-10122-CVDP-C89F22C1-260C-4683-9AA9-B105AFAF4547		RKI	ncov	Human	B.1.1.7	20I (Alpha, V1)	2021-02-26	Europe	Germany	Baden-Württemberg	Landkreis Karlsruhe	Karlsruhe	76131	49.0078	8.4199		20I (Alpha, V1)	B.1.1.7	false	false	false	false	false	false	false	false	false
IMS-10020-CVDP-0DF98220-6307-40A9-86AF-D1DE04819AAD		RKI	ncov	Human	B.1.1.7	20I (Alpha, V1)	2021-02-17	Europe	Germany	Bayern	Landkreis Weiden i.d.OPf.	Weiden	92637	49.6768	12.1561		20I (Alpha, V1)	B.1.1.7	false	false	false	false	false	false	false	false	false
6166ba5c81e18c1c41cedf1e	1028301220	IIMK	ncov	Human	B.1.1.7	20I (Alpha, V1)	2021-03-30	Europe	Germany	Thuringia	Landkreis Kyffhäuserkreis	Greußen	99718	51.2286	10.9491	714	20I (Alpha, V1)	Q.7	false	false	false	false	false	false	false	false	false
IMS-10375-CVDP-1FC5868D-CE6A-4DC7-AAAD-9D3BA381C468		RKI	ncov	Human	B.1.1.7	20I (Alpha, V1)	2021-04-01	Europe	Germany	Baden-Württemberg	Landkreis Mannheim	Mannheim	68167	49.4996	8.4939		20I (Alpha, V1)	B.1.1.7	false	false	false	false	false	false	false	false	false
IMS-10013-CVDP-E818A7F9-E2D7-4BCE-989E-FD3ABA5A8349		RKI	ncov	Human	B.1.1.7	20I (Alpha, V1)	2021-03-26	Europe	Germany	Hamburg	Landkreis Hamburg; Freie und Hansestadt	Hamburg	21079	53.5722	10.0031		20I (Alpha, V1)	B.1.1.7	false	false	false	false	false	false	false	false	false
6166ba5c81e18c1c41cedda7	1091305477	IIMK	ncov	Human	B.1.1.7	20I (Alpha, V1)	2021-03-23	Europe	Germany	Thuringia	Landkreis Ilm-Kreis	Arnstadt	99310	50.8343	10.9456	16	20I (Alpha, V1)	B.1.1.7	false	false	false	false	false	false	false	false	false
IMS-10257-CVDP-1DE46DA9-A007-4C41-98F7-E40ABAD96330		RKI	ncov	Human	B.1.1.7	20I (Alpha, V1)	2021-04-16	Europe	Germany	Hessen	Landkreis Frankfurt am Main; Stadt	Frankfurt am Main	65926	50.096	8.7111		20I (Alpha, V1)	B.1.1.7	false	false	false	false	false	false	false	false	false
IMS-10209-CVDP-BB60F10D-3E5C-40FA-B2AA-F64F80F02A0C		RKI	ncov	Human	B.1.1.7	20I (Alpha, V1)	2021-03-29	Europe	Germany	Baden-Württemberg	Landkreis Konstanz	Konstanz	78467	47.6744	9.1649		20I (Alpha, V1)	B.1.1.7	false	false	false	false	false	false	false	false	false
IMS-10020-CVDP-23880416-7F06-4185-8582-930B66245C60		RKI	ncov	Human	B.1.1.7	20I (Alpha, V1)	2021-05-03	Europe	Germany	Baden-Württemberg	Landkreis Esslingen	Leinfelden-Echterdingen	70771	48.6941	9.1681		20I (Alpha, V1)	B.1.1.7	false	false	false	false	false	false	false	false	false
IMS-10150-CVDP-32E9B454-EFBA-4026-A2C8-7A4ED84A5886		RKI	ncov	Human	B.1.1.7	20I (Alpha, V1)	2021-05-06	Europe	Germany	Nordrhein-Westfalen	Landkreis Leverkusen; Stadt	Leverkusen	51375	51.0331	7.052		20I (Alpha, V1)	B.1.1.7	false	false	false	false	false	false	false	false	false
IMS-10020-CVDP-D6DDBA04-81A5-4342-92C9-95C9CC2BA40B		RKI	ncov	Human	B.1.1.7	20I (Alpha, V1)	2021-03-25	Europe	Germany	Baden-Württemberg	Landkreis Esslingen	Leinfelden-Echterdingen	70771	48.6941	9.1681		20I (Alpha, V1)	B.1.1.7	false	false	false	false	false	false	false	false	false
IMS-10150-CVDP-D4008014-23E5-4AB7-9A27-9C9ECDB2D183		RKI	ncov	Human	B.1.1.7	20I (Alpha, V1)	2021-04-29	Europe	Germany	Nordrhein-Westfalen	Landkreis Leverkusen; Stadt	Leverkusen	51375	51.0331	7.052		20I (Alpha, V1)	B.1.1.7	false	false	false	false	false	false	false	false	false
6166ba5b81e18c1c41ced621	1050218547	IIMK	ncov	Human	B.1.1.7	20I (Alpha, V1)	2021-04-26	Europe	Germany	Thuringia	Landkreis Gera	Gera	7545	50.8753	12.0788	420	20I (Alpha, V1)	B.1.1.7	false	false	false	false	false	false	false	false	false
IMS-10117-CVDP-CB84A4A6-FCDC-4013-8FFC-E241E302EE3F		RKI	ncov	Human	B.1.1.7	20I (Alpha, V1)	2021-03-10	Europe	Germany	Nordrhein-Westfalen	Landkreis Leverkusen; Stadt	Leverkusen	51375	51.0331	7.052		20I (Alpha, V1)	B.1.1.7	false	false	false	false	false	false	false	false	false
IMS-10020-CVDP-15F23C58-9D84-4061-90F4-82608659BFDF		RKI	ncov	Human	B.1.1.7	20I (Alpha, V1)	2021-02-12	Europe	Germany	Bayern	Landkreis Weiden i.d.OPf.	Weiden	92637	49.6768	12.1561		20I (Alpha, V1)	B.1.1.7	false	false	false	false	false	false	false	false	false
IMS-10013-CVDP-D6136EE5-1C5F-4C93-960E-4238557EC867		RKI	ncov	Human	B.1.1.7	20I (Alpha, V1)	2021-03-19	Europe	Germany	Sachsen	Landkreis Nordsachsen	Wermsdorf	4779	51.2833	12.95		20I (Alpha, V1)	B.1.1.7	false	false	false	false	false	false	false	false	false
IMS-10013-CVDP-23A39C99-EB45-452F-9820-E29BB7B65616		RKI	ncov	Human	B.1.1.7	20I (Alpha, V1)	2021-04-07	Europe	Germany	Rheinland-Pfalz	Landkreis Mainz; kreisfreie Stadt	Mainz	55129	49.9661	8.2663		20I (Alpha, V1)	B.1.1.7	false	false	false	false	false	false	false	false	false
IMS-10122-CVDP-C5E30692-EAA7-49B9-BB9F-7D4D78274074		RKI	ncov	Human	B.1.1.7	20I (Alpha, V1)	2021-03-06	Europe	Germany	Baden-Württemberg	Landkreis Karlsruhe	Karlsruhe	76131	49.0078	8.4199		20I (Alpha, V1)	B.1.1.7	false	false	false	false	false	false	false	false	false
6166ba5b81e18c1c41ced118	1024628525	IIMK	ncov	Human	B.1.1.7	20I (Alpha, V1)	2021-04-16	Europe	Germany	Thuringia	Landkreis Gotha	Gotha	99867	50.9461	10.6962	0	20I (Alpha, V1)	B.1.1.7	false	false	false	false	false	false	false	false	true
IMS-10020-CVDP-4C42D757-FA3B-49AD-9098-B6C989C79041		RKI	ncov	Human	B.1.1.7	20I (Alpha, V1)	2021-02-25	Europe	Germany	Berlin	Landkreis Berlin; Stadt	Berlin	10829	52.4761	13.3607		20I (Alpha, V1)	B.1.1.7	false	false	false	false	false	false	false	false	false
6166ba5c81e18c1c41cedbd9	1050175817	IIMK	ncov	Human	B.1.1.7	20I (Alpha, V1)	2021-03-17	Europe	Germany	Thuringia	Landkreis Gera	Gera	7551	50.8753	12.0788	200	20I (Alpha, V1)	B.1.1.7	false	false	false	false	false	false	false	false	false
IMS-10117-CVDP-DE2E8F48-6794-4B41-A881-E3D135055221		RKI	ncov	Human	B.1.1.7	20I (Alpha, V1)	2021-03-29	Europe	Germany	Hamburg	Landkreis Hamburg; Freie und Hansestadt	Hamburg	22083	53.5722	10.0031		20I (Alpha, V1)	B.1.1.7	false	false	false	false	false	false	false	false	false
IMS-10020-CVDP-533CDF2D-CFC8-46E4-B6B7-F63EA7995E66		RKI	ncov	Human	B.1.1.7	20I (Alpha, V1)	2021-04-20	Europe	Germany	Baden-Württemberg	Landkreis Esslingen	Leinfelden-Echterdingen	70771	48.6941	9.1681		20I (Alpha, V1)	B.1.1.7	false	false	false	false	false	false	false	false	false
IMS-10004-CVDP-F7D51A38-27CF-41B4-818D-D128A7BEB604		RKI	ncov	Human	B.1.1.7	20I (Alpha, V1)	2021-04-16	Europe	Germany	Schleswig-Holstein	Kreis Herzogtum Lauenburg	Kreis Herzogtum Lauenburg	21502	53.5966	10.5762		20I (Alpha, V1)	B.1.1.7	false	false	false	false	false	false	false	false	false
IMS-10150-CVDP-F73540D3-DF09-4D1E-B1F5-B0D6A1F593DE		RKI	ncov	Human	B.1.1.7	20I (Alpha, V1)	2021-04-23	Europe	Germany	Rheinland-Pfalz	Landkreis Trier; kreisfreie Stadt	Trier	54290	49.7537	6.6393		20I (Alpha, V1)	B.1.1.7	false	false	false	false	false	false	false	false	false
IMS-10013-CVDP-FE693497-ECD0-4BD2-A222-73499339FE1C		RKI	ncov	Human	B.1.1.7	20I (Alpha, V1)	2021-02-26	Europe	Germany	Hamburg	Landkreis Hamburg; Freie und Hansestadt	Hamburg	21079	53.5722	10.0031		20I (Alpha, V1)	B.1.1.7	false	false	false	false	false	false	false	false	false
IMS-10186-CVDP-2C5E277B-4459-4F8E-9E13-D2C1CDF7D3E3		RKI	ncov	Human	B.1.1.7	20I (Alpha, V1)	2021-03-29	Europe	Germany	Nordrhein-Westfalen	Landkreis Düsseldorf; Stadt	Düsseldorf	40210	51.2216	6.7897		20I (Alpha, V1)	B.1.1.7	false	false	false	false	false	false	false	false	false
IMS-10013-CVDP-2F79A683-A15C-49CF-B136-B37878181DCB		RKI	ncov	Human	B.1.1.7	20I (Alpha, V1)	2021-03-08	Europe	Germany	Sachsen	Landkreis Nordsachsen	Wermsdorf	4779	51.2833	12.95		20I (Alpha, V1)	B.1.1.7	false	false	false	false	true	false	false	false	false
IMS-10122-CVDP-0EBE9547-1389-410C-A10A-6C1F52C8AAB5		RKI	ncov	Human	B.1.1.7	20I (Alpha, V1)	2021-02-24	Europe	Germany	Sachsen	Kreisfreie Stadt Leipzig	Leipzig	4289	51.3667	12.3833		20I (Alpha, V1)	B.1.1.7	false	false	false	false	false	false	false	false	false
IMS-10122-CVDP-ABC8E3AE-8AD2-4F77-BDF4-C9A2F8088348		RKI	ncov	Human	B.1.1.7	20I (Alpha, V1)	2021-03-12	Europe	Germany	Baden-Württemberg	Landkreis Karlsruhe	Karlsruhe	76131	49.0078	8.4199		20I (Alpha, V1)	B.1.1.7	false	false	false	false	false	false	false	false	false
IMS-10218-CVDP-9696D151-2F90-4ECB-8F19-EDD31712B11C		RKI	ncov	Human	B.1.1.7	20I (Alpha, V1)	2021-03-10	Europe	Germany	Sachsen-Anhalt	Landkreis Landeshauptstadt Magdeburg	Magdeburg	39104	52.1243	11.6322		20I (Alpha, V1)	B.1.1.7	false	false	false	false	false	false	false	false	false
IMS-10020-CVDP-08131659-5EBA-4326-974D-CDA9627436AB		RKI	ncov	Human	B.1.1.7	20I (Alpha, V1)	2021-04-16	Europe	Germany	Rheinland-Pfalz	Landkreis Trier; kreisfreie Stadt	Trier	54290	49.7537	6.6393		20I (Alpha, V1)	B.1.1.7	false	false	false	false	false	false	false	false	false
IMS-10087-CVDP-0BB73D2D-345F-4B5A-B71A-F7C804A20FF2		RKI	ncov	Human	B.1.1.7	20I (Alpha, V1)	2021-02-26	Europe	Germany	Nordrhein-Westfalen	Landkreis Köln; Stadt	Köln	50858	50.9243	6.8565		20I (Alpha, V1)	B.1.1.7	false	false	false	false	false	false	false	false	false
IMS-10375-CVDP-5B8C01B5-5D50-471F-9A3C-56AF22AF2EC9		RKI	ncov	Human	B.1.1.7	20I (Alpha, V1)	2021-01-11	Europe	Germany	Baden-Württemberg	Landkreis Mannheim	Mannheim	68167	49.4996	8.4939		20I (Alpha, V1)	B.1.1.7	false	false	false	false	false	false	false	false	false
IMS-10197-CVDP-F0DF43C9-D5B5-4FCC-A046-E3FDC2A049BC		RKI	ncov	Human	B.1.1.7	20I (Alpha, V1)	2021-04-27	Europe	Germany	Sachsen-Anhalt	Landkreis Landeshauptstadt Magdeburg	Magdeburg	39124	52.1638	11.6333		20I (Alpha, V1)	B.1.1.7	false	false	false	false	false	false	false	false	false
IMS-10150-CVDP-C77023D1-5A11-4F62-ADB5-C191FF805A3A		RKI	ncov	Human	B.1.1.7	20I (Alpha, V1)	2021-05-01	Europe	Germany	Rheinland-Pfalz	Landkreis Trier; kreisfreie Stadt	Trier	54290	49.7537	6.6393		20I (Alpha, V1)	B.1.1.7	false	false	false	false	false	false	false	false	false
IMS-10004-CVDP-AEEEA848-A129-47E8-8923-5DE60CAE6097		RKI	ncov	Human	B.1.1.7	20I (Alpha, V1)	2021-04-06	Europe	Germany	Schleswig-Holstein	Kreis Herzogtum Lauenburg	Kreis Herzogtum Lauenburg	21502	53.5966	10.5762		20I (Alpha, V1)	B.1.1.7	false	false	false	false	false	false	false	false	false
IMS-10174-CVDP-1D5FB44A-F020-41A0-927D-29804B0B28BA		RKI	ncov	Human	B.1.1.7	20I (Alpha, V1)	2021-04-17	Europe	Germany	Bayern	Kreisfreie Stadt München	München	80937	48.1974	11.5721		20I (Alpha, V1)	B.1.1.7	false	false	false	false	false	false	false	false	false
IMS-10213-CVDP-4467E6A8-B926-4082-92E2-7BC19CE024F6		RKI	ncov	Human	B.1.1.7	20I (Alpha, V1)	2021-02-22	Europe	Germany	Sachsen	Kreisfreie Stadt Dresden	Dresden	1067	51.0628	13.7297		20I (Alpha, V1)	B.1.1.7	false	false	false	false	false	false	false	false	false
6166b85c81e18c1c41cec8e5	IMS-10013-CVDP-7420c407-b3a0-4e17-965d-2b49b647832b	IIMK	ncov	Human	B.1.1.7	20I (Alpha, V1)	2021-05-19	Europe	Germany	Thuringia	Landkreis Unstrut-Hainich-Kreis	Mühlhausen	99974	51.2088	10.459	25	20I (Alpha, V1)	B.1.1.7	false	false	false	false	false	false	false	false	false
IMS-10116-CVDP-547AB2D4-561B-42B4-B078-188452EBB813		RKI	ncov	Human	B.1.1.7	20I (Alpha, V1)	2021-05-06	Europe	Germany	Baden-Württemberg	Landkreis Ravensburg	Ravensburg	88212	47.7815	9.6183		20I (Alpha, V1)	B.1.1.7	false	false	false	false	false	false	false	false	false
IMS-10203-CVDP-C5D2BC3E-AE29-475D-BDC7-84948DB5A36D		RKI	ncov	Human	B.1.1.7	20I (Alpha, V1)	2021-03-06	Europe	Germany	Hamburg	Landkreis Hamburg; Freie und Hansestadt	Hamburg	20095	53.5722	10.0031		20I (Alpha, V1)	B.1.1.7	false	false	false	false	false	false	false	false	false
IMS-10213-CVDP-4B066D45-4DA5-481F-83FC-CFDA6D7EB155		RKI	ncov	Human	B.1.1.7	20I (Alpha, V1)	2021-04-19	Europe	Germany	Sachsen	Kreisfreie Stadt Dresden	Dresden	1067	51.0628	13.7297		20I (Alpha, V1)	B.1.1.7	false	false	false	false	false	false	false	false	false
IMS-10587-CVDP-61A44683-F1DD-4139-83D3-D4250241279C		RKI	ncov	Human	B.1.1.7	20I (Alpha, V1)	2021-03-29	Europe	Germany	Hamburg	Landkreis Hamburg; Freie und Hansestadt	Hamburg	20095	53.5722	10.0031		20I (Alpha, V1)	B.1.1.7	false	false	false	false	false	false	false	false	false
IMS-10186-CVDP-746E845F-D710-4A50-904B-E1DCE04D33D3		RKI	ncov	Human	B.1.1.7	20I (Alpha, V1)	2021-04-22	Europe	Germany	Nordrhein-Westfalen	Landkreis Düsseldorf; Stadt	Düsseldorf	40210	51.2216	6.7897		20I (Alpha, V1)	B.1.1.7	false	false	false	false	false	false	false	false	false
IMS-10020-CVDP-B6604D3F-2A3C-456C-87ED-A617064C9C48		RKI	ncov	Human	B.1.1.7	20I (Alpha, V1)	2021-02-16	Europe	Germany	Baden-Württemberg	Landkreis Karlsruhe	Ettlingen	76275	48.9409	8.4076		20I (Alpha, V1)	B.1.1.7	false	false	false	false	false	false	false	false	false
IMS-10020-CVDP-4B0C428C-D390-47F2-8F14-C683B11862F4		RKI	ncov	Human	B.1.1.7	20I (Alpha, V1)	2021-03-10	Europe	Germany	Baden-Württemberg	Landkreis Esslingen	Leinfelden-Echterdingen	70771	48.6941	9.1681		20I (Alpha, V1)	B.1.1.7	false	false	false	false	false	false	false	false	false
IMS-10020-CVDP-A828F0C9-87A6-43C8-8D60-CE662B3A2782		RKI	ncov	Human	B.1.1.7	20I (Alpha, V1)	2021-02-16	Europe	Germany	Bayern	Landkreis Weiden i.d.OPf.	Weiden	92637	49.6768	12.1561		20I (Alpha, V1)	B.1.1.7	false	false	false	false	false	false	false	false	false
IMS-10013-CVDP-9EFDFFC6-D7EC-4A16-8012-C56C7AE543A7		RKI	ncov	Human	B.1.1.7	20I (Alpha, V1)	2021-03-19	Europe	Germany	Niedersachsen	Landkreis Region Hannover	Hannover	30163	52.3943	9.7475		20I (Alpha, V1)	B.1.1.7	false	false	false	false	false	false	false	false	false
6166ba5c81e18c1c41cedc59	1024626104	IIMK	ncov	Human	B.1.1.7	20I (Alpha, V1)	2021-03-18	Europe	Germany	Thuringia	Landkreis Gotha	Dreigleichen	99869	50.8916	10.8103	49	20I (Alpha, V1)	B.1.1.7	false	false	false	false	false	false	false	false	false
IMS-10020-CVDP-95C31A32-47A8-4F33-96AB-E8E5AA711DDC		RKI	ncov	Human	B.1.1.7	20I (Alpha, V1)	2021-04-18	Europe	Germany	Baden-Württemberg	Landkreis Esslingen	Leinfelden-Echterdingen	70771	48.6941	9.1681		20I (Alpha, V1)	B.1.1.7	false	false	false	false	false	false	false	false	false
6166ba5c81e18c1c41ceda85	1091294380	IIMK	ncov	Human	B.1.1.7	20I (Alpha, V1)	2021-03-12	Europe	Germany	Thuringia	Landkreis Unstrut-Hainich-Kreis	Südeichsfeld	99988	51.1713	10.2762	181	20I (Alpha, V1)	B.1.1.7	false	false	false	false	false	false	false	false	false
IMS-10036-CVDP-719F2C81-96E7-44EC-959B-57482F0122E2		RKI	ncov	Human	B.1.1.7	20I (Alpha, V1)	2021-03-29	Europe	Germany	Berlin	Landkreis Berlin; Stadt	Berlin	12247	52.4395	13.3462		20I (Alpha, V1)	B.1.1.7	false	false	false	false	false	false	false	false	false
IMS-10117-CVDP-9ED831CD-967B-49A1-8804-6B7FF4ED8A86		RKI	ncov	Human	B.1.1.7	20I (Alpha, V1)	2021-03-29	Europe	Germany	Nordrhein-Westfalen	Landkreis Leverkusen; Stadt	Leverkusen	51375	51.0331	7.052		20I (Alpha, V1)	B.1.1.7	false	false	false	false	false	false	false	true	false
IMS-10013-CVDP-709C1CCA-1ED3-4EEE-8091-64CE804AA111		RKI	ncov	Human	B.1.1.7	20I (Alpha, V1)	2021-03-15	Europe	Germany	Hessen	Landkreis Kassel; documenta-Stadt	Kassel	34119	51.3152	9.4647		20I (Alpha, V1)	B.1.1.7	false	false	false	false	false	false	false	false	false
IMS-10338-CVDP-561D7467-7FEB-4FF4-8605-C67CE479A8FB		RKI	ncov	Human	B.1.1.7	20I (Alpha, V1)	2021-03-23	Europe	Germany	Hessen	Landkreis Frankfurt am Main; Stadt	Frankfurt am Main	60327	50.1038	8.6522		20I (Alpha, V1)	B.1.1.7	false	false	false	false	false	false	false	false	false
IMS-10020-CVDP-3A3C2005-ADB0-4114-9F5D-A2D77E616F48		RKI	ncov	Human	B.1.1.7	20I (Alpha, V1)	2021-04-14	Europe	Germany	Nordrhein-Westfalen	Landkreis Leverkusen; Stadt	Leverkusen	51375	51.0331	7.052		20I (Alpha, V1)	B.1.1.7	false	false	false	false	false	false	false	false	false
6166ba5b81e18c1c41ced399	1028313744	IIMK	ncov	Human	B.1.1.7	20I (Alpha, V1)	2021-04-21	Europe	Germany	Thuringia	Landkreis Ilm-Kreis	Arnstadt	99310	50.8343	10.9456	0	20I (Alpha, V1)	B.1.1.7	false	false	false	false	false	false	false	false	true
IMS-10020-CVDP-B484647A-B98A-4477-9C52-344613C69602		RKI	ncov	Human	B.1.1.7	20I (Alpha, V1)	2021-04-13	Europe	Germany	Nordrhein-Westfalen	Landkreis Leverkusen; Stadt	Leverkusen	51375	51.0331	7.052		20I (Alpha, V1)	B.1.1.7	false	false	false	false	false	false	false	false	false
IMS-10117-CVDP-E632D8E9-243B-4BD8-B2B2-63A948633549		RKI	ncov	Human	B.1.1.7	20I (Alpha, V1)	2021-03-09	Europe	Germany	Nordrhein-Westfalen	Landkreis Leverkusen; Stadt	Leverkusen	51375	51.0331	7.052		20I (Alpha, V1)	B.1.1.7	false	false	false	false	false	false	false	false	false
IMS-10020-CVDP-4EFC2FAD-8640-44D0-B2D0-3A676E164A8A		RKI	ncov	Human	B.1.1.7	20I (Alpha, V1)	2021-04-15	Europe	Germany	Baden-Württemberg	Landkreis Esslingen	Leinfelden-Echterdingen	70771	48.6941	9.1681		20I (Alpha, V1)	Q.7	false	false	false	false	false	false	false	false	false
IMS-10227-CVDP-4703E04E-A83D-483D-BD59-12A4E634CFED		RKI	ncov	Human	B.1.1.7	20I (Alpha, V1)	2021-03-16	Europe	Germany	Nordrhein-Westfalen	Landkreis Düsseldorf; Stadt	Düsseldorf	40477	51.2371	6.7795		20I (Alpha, V1)	B.1.1.7	false	false	false	false	false	false	false	false	false
IMS-10020-CVDP-74868989-8B65-4150-A070-16891B7365F4		RKI	ncov	Human	B.1.1.7	20I (Alpha, V1)	2021-03-16	Europe	Germany	Baden-Württemberg	Landkreis Esslingen	Leinfelden-Echterdingen	70771	48.6941	9.1681		20I (Alpha, V1)	Q.7	false	false	false	false	false	false	false	false	false
IMS-10020-CVDP-06947E4E-9A6B-49C2-976E-6E962BF922A8		RKI	ncov	Human	B.1.1.7	20I (Alpha, V1)	2021-03-31	Europe	Germany	Baden-Württemberg	Landkreis Esslingen	Leinfelden-Echterdingen	70771	48.6941	9.1681		20I (Alpha, V1)	B.1.1.7	false	false	false	false	false	false	false	false	false
IMS-10122-CVDP-0F967348-BA64-49C6-BF95-57EA2789C320		RKI	ncov	Human	B.1.1.7	20I (Alpha, V1)	2021-04-16	Europe	Germany	Baden-Württemberg	Landkreis Karlsruhe	Karlsruhe	76131	49.0078	8.4199		20I (Alpha, V1)	B.1.1.7	false	false	false	false	false	false	false	false	false
6166ba5b81e18c1c41cec9d2	1091345362	IIMK	ncov	Human	B.1.1.7	20I (Alpha, V1)	2021-05-04	Europe	Germany	Thuringia	Landkreis Unstrut-Hainich-Kreis	Mühlhausen	99974	51.2088	10.459	0	20I (Alpha, V1)	B.1.1.7	false	false	false	false	false	false	false	false	false
IMS-10013-CVDP-C4BED327-8BCF-467C-8D47-4BC9D026360A		RKI	ncov	Human	B.1.1.7	20I (Alpha, V1)	2021-04-16	Europe	Germany	Bayern	Landkreis Augsburg; Stadt	Augsburg	86154	48.3932	10.8814		20I (Alpha, V1)	B.1.1.7	false	false	false	false	false	false	false	false	false
IMS-10122-CVDP-00574		RKI	ncov	Human	B.1.1.7	20I (Alpha, V1)	2021-01-21	Europe	Germany	Baden-Württemberg	Landkreis Karlsruhe	Karlsruhe	76131	49.0078	8.4199		20I (Alpha, V1)	B.1.1.7	false	false	false	false	false	false	false	false	false
6166ba5b81e18c1c41cecd89	1091315815	IIMK	ncov	Human	B.1.1.7	20I (Alpha, V1)	2021-04-01	Europe	Germany	Thuringia	Landkreis Ilm-Kreis	Arnstadt	99310	50.8343	10.9456	750	20I (Alpha, V1)	B.1.1.7	false	false	false	false	false	false	false	false	false
IMS-10013-CVDP-F825FB46-C079-40CB-A182-52089AB0C54A		RKI	ncov	Human	B.1.1.7	20I (Alpha, V1)	2021-04-07	Europe	Germany	Hessen	Landkreis Frankfurt am Main; Stadt	Frankfurt am Main	60590	50.0837	8.644		20I (Alpha, V1)	B.1.1.7	false	false	false	false	false	false	false	false	false
IMS-10020-CVDP-5D25BAF9-0A6C-4E41-B6E4-CFDE3A75807F		RKI	ncov	Human	B.1.1.7	20I (Alpha, V1)	2021-02-10	Europe	Germany	Bayern	Kreisfreie Stadt München	München	80335	48.1427	11.5552		20I (Alpha, V1)	B.1.1.7	false	false	false	false	false	false	false	false	false
IMS-10117-CVDP-58092EB2-8075-4B1E-8589-3BF4908030BD		RKI	ncov	Human	B.1.1.7	20I (Alpha, V1)	2021-03-22	Europe	Germany	Baden-Württemberg	Landkreis Rhein-Neckar-Kreis	Eppelheim	69214	49.4019	8.6364		20I (Alpha, V1)	B.1.1.7	false	false	false	false	false	false	false	false	false
IMS-10150-CVDP-9CC0AB4B-3CF0-4D28-9475-5EE525B2D3C8		RKI	ncov	Human	B.1.1.7	20I (Alpha, V1)	2021-04-28	Europe	Germany	Nordrhein-Westfalen	Landkreis Leverkusen; Stadt	Leverkusen	51375	51.0331	7.052		20I (Alpha, V1)	B.1.1.7	false	false	false	false	false	false	false	false	false
IMS-10117-CVDP-57A316F4-8C51-4C4F-B127-885731FC5065		RKI	ncov	Human	B.1.1.7	20I (Alpha, V1)	2021-03-08	Europe	Germany	Baden-Württemberg	Landkreis Rhein-Neckar-Kreis	Eppelheim	69214	49.4019	8.6364		20I (Alpha, V1)	B.1.1.7	false	false	false	false	false	false	false	false	false
IMS-10061-CVDP-AAED05AC-0549-40AA-9293-4C385996F826		RKI	ncov	Human	B.1.1.7	20I (Alpha, V1)	2021-04-16	Europe	Germany	Sachsen-Anhalt	Kreisfreie Stadt Halle	Halle	6112	51.4753	11.9973		20I (Alpha, V1)	B.1.1.7	false	false	false	false	false	false	false	false	false
IMS-10294-CVDP-D38281A3-FBE3-4CFA-99B4-B54DFE1DBE57		RKI	ncov	Human	B.1.1.7	20I (Alpha, V1)	2021-02-25	Europe	Germany	Nordrhein-Westfalen	Landkreis Düsseldorf; Stadt	Düsseldorf	40477	51.2371	6.7795		20I (Alpha, V1)	B.1.1.7	false	false	false	false	false	false	false	false	false
IMS-10020-CVDP-636ECC80-5AD6-4B9E-AE91-0AB1687925E4		RKI	ncov	Human	B.1.1.7	20I (Alpha, V1)	2021-04-19	Europe	Germany	Baden-Württemberg	Landkreis Esslingen	Leinfelden-Echterdingen	70771	48.6941	9.1681		20I (Alpha, V1)	B.1.1.7	false	false	false	false	false	false	false	false	false
IMS-10020-CVDP-2A04BAD5-2ABF-4EF4-B8F9-C7DB50C442AA		RKI	ncov	Human	B.1.1.7	20I (Alpha, V1)	2021-03-26	Europe	Germany	Rheinland-Pfalz	Landkreis Trier; kreisfreie Stadt	Trier	54290	49.7537	6.6393		20I (Alpha, V1)	B.1.1.7	false	false	false	false	false	false	false	false	false
IMS-10146-CVDP-24AF15F1-E506-4DAA-923B-97155948DF55		RKI	ncov	Human	B.1.1.7	20I (Alpha, V1)	2021-03-22	Europe	Germany	Baden-Württemberg	Landkreis Ulm; Stadt	Ulm	89073	48.4015	9.9927		20I (Alpha, V1)	B.1.1.7	false	false	false	false	false	false	false	false	false
IMS-10004-CVDP-C2BA6ED6-5C95-4176-ADAD-BDEB2AC77BB3		RKI	ncov	Human	B.1.1.7	20I (Alpha, V1)	2021-02-18	Europe	Germany	Schleswig-Holstein	Kreis Herzogtum Lauenburg	Kreis Herzogtum Lauenburg	21502	53.5966	10.5762		20I (Alpha, V1)	B.1.1.7	false	false	false	false	false	false	false	false	false
IMS-10020-CVDP-2AB4E7AD-D43A-45CD-BDA8-D90E086A5CD3		RKI	ncov	Human	B.1.1.7	20I (Alpha, V1)	2021-04-08	Europe	Germany	Baden-Württemberg	Landkreis Esslingen	Leinfelden-Echterdingen	70771	48.6941	9.1681		20I (Alpha, V1)	B.1.1.7	false	false	false	false	false	false	false	false	false
IMS-10020-CVDP-99E520C6-4112-4D77-9141-48B9EF5587B3		RKI	ncov	Human	B.1.1.7	20I (Alpha, V1)	2021-02-16	Europe	Germany	Bayern	Landkreis Weiden i.d.OPf.	Weiden	92637	49.6768	12.1561		20I (Alpha, V1)	B.1.1.7	false	false	false	false	false	false	false	false	false
IMS-10004-CVDP-17E19F9D-D094-4FCA-8C80-0DB846B17A33		RKI	ncov	Human	B.1.1.7	20I (Alpha, V1)	2021-04-19	Europe	Germany	Schleswig-Holstein	Kreis Herzogtum Lauenburg	Kreis Herzogtum Lauenburg	21502	53.5966	10.5762		20I (Alpha, V1)	B.1.1.7	false	false	false	false	false	false	false	false	false
IMS-10257-CVDP-2286D900-B0B1-4D6B-957D-788B22AE12B0		RKI	ncov	Human	B.1.1.7	20I (Alpha, V1)	2021-04-13	Europe	Germany	Hessen	Landkreis Frankfurt am Main; Stadt	Frankfurt am Main	65926	50.096	8.7111		20I (Alpha, V1)	B.1.1.7	false	false	false	false	false	false	false	false	false
IMS-10013-CVDP-5A8D5CF5-1EF8-4322-A5B3-3AD01B683378		RKI	ncov	Human	B.1.1.7	20I (Alpha, V1)	2021-02-11	Europe	Germany	Sachsen	Landkreis Nordsachsen	Wermsdorf	4779	51.2833	12.95		20I (Alpha, V1)	B.1.1.7	false	false	false	false	false	false	false	false	false
IMS-10261-CVDP-94F2CAA9-51AF-46B2-A280-F4C6F5BCA3EA		RKI	ncov	Human	B.1.1.7	20I (Alpha, V1)	2021-04-09	Europe	Germany	Nordrhein-Westfalen	Landkreis Lippe	Bad Salzuflen	32105	52.0808	8.7505		20I (Alpha, V1)	B.1.1.7	false	false	false	false	false	false	false	false	false
IMS-10061-CVDP-D8B6F786-9D11-4444-9A8C-0FCDC5077FB4		RKI	ncov	Human	B.1.1.7	20I (Alpha, V1)	2021-03-30	Europe	Germany	Nordrhein-Westfalen	Landkreis Bielefeld; Stadt	Bielefeld	33602	52.0245	8.5326		20I (Alpha, V1)	B.1.1.7	false	false	false	false	false	false	false	false	false
6166ba5c81e18c1c41ced77b	1024585664	IIMK	ncov	Human	B.1.1.7	20I (Alpha, V1)	2021-02-25	Europe	Germany	Thuringia	Landkreis Eichsfeld	Heiligenstadt	37308	51.378	10.1376	57	20I (Alpha, V1)	B.1.1.7	false	false	false	false	false	false	false	false	false
IMS-10004-CVDP-F26D1E06-EFF7-4756-A7F9-9360C1AC98E9		RKI	ncov	Human	B.1.1.7	20I (Alpha, V1)	2021-04-14	Europe	Germany	Schleswig-Holstein	Kreis Herzogtum Lauenburg	Kreis Herzogtum Lauenburg	21502	53.5966	10.5762		20I (Alpha, V1)	B.1.1.7	false	false	false	false	false	false	false	false	false
IMS-10013-CVDP-7C0C043F-A75C-4366-8775-FD583415C418		RKI	ncov	Human	B.1.1.7	20I (Alpha, V1)	2021-04-30	Europe	Germany	Hamburg	Landkreis Hamburg; Freie und Hansestadt	Hamburg	22339	53.5722	10.0031		20I (Alpha, V1)	B.1.1.7	false	false	false	false	false	false	false	false	false
IMS-10122-CVDP-C84D77C2-D391-46CA-92DC-17DA5569BA3B		RKI	ncov	Human	B.1.1.7	20I (Alpha, V1)	2021-02-25	Europe	Germany	Sachsen	Kreisfreie Stadt Dresden	Dresden	1239	51.0066	13.8089		20I (Alpha, V1)	B.1.1.7	false	false	false	false	false	false	false	false	false
IMS-10020-CVDP-F2562493-FD5D-434E-A8BE-545624C8F458		RKI	ncov	Human	B.1.1.7	20I (Alpha, V1)	2021-02-10	Europe	Germany	Baden-Württemberg	Landkreis Esslingen	Leinfelden-Echterdingen	70771	48.6941	9.1681		20I (Alpha, V1)	B.1.1.7	false	false	false	false	false	false	false	false	false
IMS-10061-CVDP-01385		RKI	ncov	Human	B.1.1.7	20I (Alpha, V1)	2021-02-04	Europe	Germany	Niedersachsen	Landkreis Region Hannover	Hannover	30159	52.3736	9.7371		20I (Alpha, V1)	B.1.1.7	false	false	false	false	false	false	false	false	false
IMS-10097-CVDP-34B7FF1B-B5A7-428E-AF38-B9DF05F1C016		RKI	ncov	Human	B.1.1.7	20I (Alpha, V1)	2021-04-19	Europe	Germany	Rheinland-Pfalz	Landkreis Mainz; kreisfreie Stadt	Mainz	55128	49.9808	8.2422		20I (Alpha, V1)	B.1.1.7	false	false	false	false	false	false	false	false	false
IMS-10020-CVDP-EF8B94D6-AF1F-43F0-ACD0-CF146ADC9899		RKI	ncov	Human	B.1.1.7	20I (Alpha, V1)	2021-02-24	Europe	Germany	Bayern	Landkreis Weiden i.d.OPf.	Weiden	92637	49.6768	12.1561		20I (Alpha, V1)	B.1.1.7	false	false	false	false	false	false	false	false	false
IMS-10203-CVDP-23789624-CB24-475E-991D-76D7AB1524B7		RKI	ncov	Human	B.1.1.7	20I (Alpha, V1)	2021-02-20	Europe	Germany	Hamburg	Landkreis Hamburg; Freie und Hansestadt	Hamburg	20095	53.5722	10.0031		20I (Alpha, V1)	B.1.1.7	false	false	false	false	false	false	false	false	false
IMS-10603-CVDP-BDEBAA5D-7A7F-45F4-A5F2-50653279494D		RKI	ncov	Human	B.1.1.7	20I (Alpha, V1)	2021-02-08	Europe	Germany	Saarland	Landkreis Saarpfalz-Kreis	Homburg	66424	49.3264	7.3387		20I (Alpha, V1)	B.1.1.7	false	false	false	false	false	false	false	false	false
IMS-10020-CVDP-FC31B1C2-8F02-40C5-95A0-168C0FD064DE		RKI	ncov	Human	B.1.1.7	20I (Alpha, V1)	2021-03-25	Europe	Germany	Rheinland-Pfalz	Landkreis Trier; kreisfreie Stadt	Trier	54290	49.7537	6.6393		20I (Alpha, V1)	B.1.1.7	false	false	false	false	false	false	false	false	false
IMS-10020-CVDP-E7F50C66-F833-41D2-803C-D4D7A6A772D0		RKI	ncov	Human	B.1.1.7	20I (Alpha, V1)	2021-04-01	Europe	Germany	Baden-Württemberg	Landkreis Esslingen	Leinfelden-Echterdingen	70771	48.6941	9.1681		20I (Alpha, V1)	B.1.1.7	false	false	false	false	false	false	false	false	false
IMS-10272-CVDP-00234		RKI	ncov	Human	B.1.1.7	20I (Alpha, V1)	2021-01-20	Europe	Germany	Bayern	Landkreis München	Oberschleißheim	85764	48.25	11.5667		20I (Alpha, V1)	B.1.1.7	false	false	false	false	false	false	false	false	false
IMS-10259-CVDP-3FC0FC79-032F-4D18-B38C-98FFE00B8683		RKI	ncov	Human	B.1.1.7	20I (Alpha, V1)	2021-02-28	Europe	Germany	Nordrhein-Westfalen	Landkreis Essen; Stadt	Essen	45147	51.4408	6.9863		20I (Alpha, V1)	B.1.1.7	false	false	false	false	false	false	false	false	false
IMS-10294-CVDP-779		RKI	ncov	Human	B.1.1.7	20I (Alpha, V1)	2021-02-14	Europe	Germany	Nordrhein-Westfalen	Landkreis Düsseldorf; Stadt	Düsseldorf	40477	51.2371	6.7795		20I (Alpha, V1)	B.1.1.7	false	false	false	false	false	false	false	false	false
IMS-10020-CVDP-98D6F1CC-68DF-4619-8545-A779BBE8A9FB		RKI	ncov	Human	B.1.1.7	20I (Alpha, V1)	2021-03-26	Europe	Germany	Rheinland-Pfalz	Landkreis Trier; kreisfreie Stadt	Trier	54290	49.7537	6.6393		20I (Alpha, V1)	B.1.1.7	false	false	false	false	false	false	false	false	false
IMS-10117-CVDP-AEE104B5-9176-4A28-BD48-4314573F330D		RKI	ncov	Human	B.1.1.7	20I (Alpha, V1)	2021-03-16	Europe	Germany	Baden-Württemberg	Landkreis Rhein-Neckar-Kreis	Eppelheim	69214	49.4019	8.6364		20I (Alpha, V1)	B.1.1.7	false	false	false	false	false	false	false	false	false
IMS-10013-CVDP-F2870187-A8B6-47DE-A519-D9BFF0BB53B5		RKI	ncov	Human	B.1.1.7	20I (Alpha, V1)	2021-04-09	Europe	Germany	Bremen	Kreisfreie Stadt Bremen	Bremen	28357	53.1178	8.8947		20I (Alpha, V1)	B.1.1.7	false	false	false	false	false	false	false	false	false
IMS-10272-CVDP-C2BA4C7D-0342-41F6-B299-7B9F02A85590		RKI	ncov	Human	B.1.1.7	20I (Alpha, V1)	2021-01-27	Europe	Germany	Bayern	Landkreis München	Oberschleißheim	85764	48.25	11.5667		20I (Alpha, V1)	B.1.1.7	false	false	false	false	false	false	false	false	false
6166ba5b81e18c1c41cecf2e	1024625729	IIMK	ncov	Human	B.1.1.7	20I (Alpha, V1)	2021-04-08	Europe	Germany	Thuringia	Landkreis Gotha	Waltershausen	99880	50.8998	10.5563	66	20I (Alpha, V1)	B.1.1.7	false	false	false	false	false	false	false	false	false
IMS-10020-CVDP-B0FEA051-A5EA-4315-A9FE-FA47105FC23D		RKI	ncov	Human	B.1.1.7	20I (Alpha, V1)	2021-02-12	Europe	Germany	Bayern	Landkreis Weiden i.d.OPf.	Weiden	92637	49.6768	12.1561		20I (Alpha, V1)	B.1.1.7	false	false	false	false	false	false	false	false	false
IMS-10116-CVDP-00201		RKI	ncov	Human	B.1.1.7	20I (Alpha, V1)	2021-01-29	Europe	Germany	Baden-Württemberg	Landkreis Heidelberg	Heidelberg	69126	49.3757	8.6911		20I (Alpha, V1)	B.1.1.7	false	false	false	false	false	false	false	false	false
IMS-10020-CVDP-A6CD5C00-377E-4810-8AD0-6896CBE5DC47		RKI	ncov	Human	B.1.1.7	20I (Alpha, V1)	2021-02-28	Europe	Germany	Baden-Württemberg	Landkreis Esslingen	Leinfelden-Echterdingen	70771	48.6941	9.1681		20I (Alpha, V1)	B.1.1.7	false	false	false	false	false	false	false	false	false
60db04a96c55b949d1446792	AN12207	IIMK	ncov	Human	B.1.1.7	20I (Alpha, V1)	2021-06-23	Europe	Germany	Thuringia	Landkreis Wartburgkreis	Wutha-Farnroda	99848	50.955	10.3905	1181	20I (Alpha, V1)	B.1.1.7	false	false	false	false	false	false	false	false	false
IMS-10375-CVDP-C6E797FB-2076-47DB-BCA8-FAB9E014913D		RKI	ncov	Human	B.1.1.7	20I (Alpha, V1)	2021-04-16	Europe	Germany	Baden-Württemberg	Landkreis Heidelberg	Heidelberg	69120	49.4169	8.6764		20I (Alpha, V1)	B.1.1.7	false	false	false	false	false	false	false	false	false
IMS-10013-CVDP-E044D4D0-C42E-498E-81EC-11E6A4423DF6		RKI	ncov	Human	B.1.1.7	20I (Alpha, V1)	2021-04-20	Europe	Germany	Saarland	Landkreis Saarpfalz-Kreis	Sankt Ingbert	66386	49.277	7.1167		20I (Alpha, V1)	B.1.1.7	false	false	false	false	false	false	false	false	false
6166ba5b81e18c1c41cecabc	1091345961	IIMK	ncov	Human	B.1.1.7	20I (Alpha, V1)	2021-05-04	Europe	Germany	Thuringia	Landkreis Ilm-Kreis	Arnstadt	99310	50.8343	10.9456	34	20I (Alpha, V1)	B.1.1.7	false	false	false	false	false	false	false	false	false
IMS-10087-CVDP-7308A362-3320-449B-8164-106CC57151E6		RKI	ncov	Human	B.1.1.7	20I (Alpha, V1)	2021-03-12	Europe	Germany	Nordrhein-Westfalen	Landkreis Köln; Stadt	Köln	50858	50.9243	6.8565		20I (Alpha, V1)	B.1.1.7	false	false	false	false	false	false	false	false	false
IMS-10295-CVDP-A924081D-0BAB-473F-93C0-C6C34255F777		RKI	ncov	Human	B.1.1.7	20I (Alpha, V1)	2021-02-04	Europe	Germany	Niedersachsen	Landkreis Region Hannover	Hannover	30623	52.3795	9.8075		20I (Alpha, V1)	B.1.1.7	false	false	false	false	false	false	false	false	false
IMS-10338-CVDP-CF7E1AFA-047A-44A5-B80C-7E108A911DED		RKI	ncov	Human	B.1.1.7	20I (Alpha, V1)	2021-02-23	Europe	Germany	Rheinland-Pfalz	Landkreis Ludwigshafen am Rhein; kreisfreie Stadt	Ludwigshafen am Rhein	67063	49.499	8.4109		20I (Alpha, V1)	B.1.1.7	false	false	false	false	false	false	false	false	false
IMS-10116-CVDP-D587C7BE-74C5-4BEF-8406-F3ADE5FB6812		RKI	ncov	Human	B.1.1.7	20I (Alpha, V1)	2021-03-29	Europe	Germany	Baden-Württemberg	Landkreis Heidelberg	Heidelberg	69126	49.3757	8.6911		20I (Alpha, V1)	B.1.1.7	false	false	false	false	false	false	false	false	false
IMS-10122-CVDP-A89CED0D-6F40-4A06-91EA-4FC749A4A53C		RKI	ncov	Human	B.1.1.7	20I (Alpha, V1)	2021-02-26	Europe	Germany	Sachsen	Kreisfreie Stadt Leipzig	Leipzig	4289	51.3667	12.3833		20I (Alpha, V1)	B.1.1.7	false	false	false	true	false	false	false	false	false
IMS-10122-CVDP-3D257AF6-9934-43F4-A227-C845BEA2191A		RKI	ncov	Human	B.1.1.7	20I (Alpha, V1)	2021-04-16	Europe	Germany	Baden-Württemberg	Landkreis Karlsruhe	Karlsruhe	76131	49.0078	8.4199		20I (Alpha, V1)	B.1.1.7	true	false	false	false	false	false	false	false	false
IMS-10013-CVDP-642D41D5-C90A-47A8-9D98-B6630B6DA476		RKI	ncov	Human	B.1.1.7	20I (Alpha, V1)	2021-04-30	Europe	Germany	Hamburg	Landkreis Hamburg; Freie und Hansestadt	Hamburg	21079	53.5722	10.0031		20I (Alpha, V1)	B.1.1.7	false	false	false	false	false	false	false	false	false
IMS-10020-CVDP-4D12DCC2-6229-41E6-9B79-A81524963CC3		RKI	ncov	Human	B.1.1.7	20I (Alpha, V1)	2021-04-01	Europe	Germany	Baden-Württemberg	Landkreis Esslingen	Leinfelden-Echterdingen	70771	48.6941	9.1681		20I (Alpha, V1)	B.1.1.7	false	false	false	false	false	false	false	false	false
IMS-10594-CVDP-387E28A1-794A-4730-966E-E4932350CB7F		RKI	ncov	Human	B.1.1.7	20I (Alpha, V1)	2021-04-27	Europe	Germany	Nordrhein-Westfalen	Landkreis Münster; Stadt	Münster	48153	51.9268	7.6313		20I (Alpha, V1)	B.1.1.7	false	false	false	false	false	false	false	false	false
IMS-10334-CVDP-61E4E7CD-A4D7-4886-B5B2-93ED0E4877CA		RKI	ncov	Human	B.1.1.7	20I (Alpha, V1)	2021-04-10	Europe	Germany	Brandenburg	Kreisfreie Stadt Cottbus	Cottbus	3048	51.7403	14.3198		20I (Alpha, V1)	B.1.1.7	false	false	false	false	false	false	false	false	false
IMS-10338-CVDP-645FD1D7-F15A-4FDE-AC96-FDFD2A268277		RKI	ncov	Human	B.1.1.7	20I (Alpha, V1)	2021-03-18	Europe	Germany	Hessen	Landkreis Frankfurt am Main; Stadt	Frankfurt am Main	60327	50.1038	8.6522		20I (Alpha, V1)	B.1.1.7	false	false	false	false	false	false	false	false	false
IMS-10020-CVDP-9A24DC4E-8BE1-4A97-96CA-01B1F57C8007		RKI	ncov	Human	B.1.1.7	20I (Alpha, V1)	2021-05-03	Europe	Germany	Baden-Württemberg	Landkreis Esslingen	Leinfelden-Echterdingen	70771	48.6941	9.1681		20I (Alpha, V1)	B.1.1.7	false	false	false	false	false	false	false	false	false
IMS-10582-CVDP-A7DDCFB8-9A08-4832-B3AD-C80CDFB00CCA		RKI	ncov	Human	B.1.1.7	20I (Alpha, V1)	2021-05-05	Europe	Germany	Mecklenburg-Vorpommern	Landkreis Vorpommern-Greifswald	Greifswald	17475	54.0881	13.3876		20I (Alpha, V1)	B.1.1.7	false	false	false	false	false	false	false	false	false
IMS-10087-CVDP-47E812EF-481B-4094-AA7C-733AC381AC70		RKI	ncov	Human	B.1.1.7	20I (Alpha, V1)	2021-04-23	Europe	Germany	Nordrhein-Westfalen	Landkreis Köln; Stadt	Köln	50858	50.9243	6.8565		20I (Alpha, V1)	B.1.1.7	false	false	false	false	false	false	false	false	false
IMS-10087-CVDP-8154C002-7AA9-4CF9-8C62-939B51482ED4		RKI	ncov	Human	B.1.1.7	20I (Alpha, V1)	2021-03-20	Europe	Germany	Nordrhein-Westfalen	Landkreis Köln; Stadt	Köln	50858	50.9243	6.8565		20I (Alpha, V1)	B.1.1.7	false	false	false	false	false	false	false	false	false
IMS-10013-CVDP-3D4D34A0-8E47-4BD2-805C-3FE297349E91		RKI	ncov	Human	B.1.1.7	20I (Alpha, V1)	2021-04-15	Europe	Germany	Saarland	Landkreis Saarpfalz-Kreis	Sankt Ingbert	66386	49.277	7.1167		20I (Alpha, V1)	B.1.1.7	false	false	false	false	false	false	false	false	false
IMS-10020-CVDP-0404F08D-A396-4E5F-9475-36641285530B		RKI	ncov	Human	B.1.1.7	20I (Alpha, V1)	2021-04-03	Europe	Germany	Berlin	Landkreis Berlin; Stadt	Berlin	10829	52.4761	13.3607		20I (Alpha, V1)	B.1.1.7	false	false	false	false	false	false	false	false	false
6166ba5c81e18c1c41cedacc	1025082223	IIMK	ncov	Human	B.1.1.7	20I (Alpha, V1)	2021-03-15	Europe	Germany	Thuringia	Landkreis Saale-Holzland-Kreis	Stadtroda	7646	50.86	11.7281	83	20I (Alpha, V1)	B.1.1.7	false	false	false	false	false	false	false	false	false
IMS-10013-CVDP-003ED5F3-E2ED-4A4D-A277-1B27415A451B		RKI	ncov	Human	B.1.1.7	20I (Alpha, V1)	2021-03-29	Europe	Germany	Sachsen	Landkreis Nordsachsen	Wermsdorf	4779	51.2833	12.95		20I (Alpha, V1)	B.1.1.7	false	false	false	false	false	false	false	false	false
IMS-10150-CVDP-B36C3D4E-1AFC-4289-91E2-79F9AC7EB29A		RKI	ncov	Human	B.1.1.7	20I (Alpha, V1)	2021-04-28	Europe	Germany	Nordrhein-Westfalen	Landkreis Leverkusen; Stadt	Leverkusen	51375	51.0331	7.052		20I (Alpha, V1)	B.1.1.7	false	false	false	false	false	false	false	false	false
IMS-10375-CVDP-76ECDA8B-02BD-4B13-8138-5B1AB4A093F2		RKI	ncov	Human	B.1.1.7	20I (Alpha, V1)	2021-03-15	Europe	Germany	Baden-Württemberg	Landkreis Mannheim	Mannheim	68167	49.4996	8.4939		20I (Alpha, V1)	B.1.1.7	false	false	false	false	false	false	false	false	false
IMS-10565-CVDP-50761B02-9887-4CEB-83C8-C66FBFBA7A41		RKI	ncov	Human	B.1.1.7	20I (Alpha, V1)	2021-03-13	Europe	Germany	Hamburg	Landkreis Hamburg; Freie und Hansestadt	Hamburg	20095	53.5722	10.0031		20I (Alpha, V1)	B.1.1.7	false	false	false	false	false	false	false	false	false
IMS-10334-CVDP-12739A56-78CD-45AE-9C6F-D70EB40AD402		RKI	ncov	Human	B.1.1.7	20I (Alpha, V1)	2021-02-21	Europe	Germany	Brandenburg	Kreisfreie Stadt Cottbus	Cottbus	3048	51.7403	14.3198		20I (Alpha, V1)	B.1.1.7	false	false	false	false	false	false	false	false	false
IMS-10013-CVDP-59537B50-1200-491D-9ECC-8B0A8F9B8400		RKI	ncov	Human	B.1.1.7	20I (Alpha, V1)	2021-03-10	Europe	Germany	Berlin	Landkreis Berlin; Stadt	Berlin	14197	52.4734	13.3118		20I (Alpha, V1)	B.1.1.7	false	false	false	false	false	false	false	false	false
IMS-10165-CVDP-A0F223AD-90CE-4D21-A74C-DDD8E6908A95		RKI	ncov	Human	B.1.1.7	20I (Alpha, V1)	2021-04-06	Europe	Germany	Sachsen	Landkreis Bautzen	Ottendorf-Okrilla	1458	51.1833	13.8333		20I (Alpha, V1)	B.1.1.7	false	false	false	false	false	false	false	false	false
IMS-10013-CVDP-6B7C8836-69B7-4E83-A95F-2D0CFE1794F6		RKI	ncov	Human	B.1.1.7	20I (Alpha, V1)	2021-03-09	Europe	Germany	Rheinland-Pfalz	Landkreis Mainz; kreisfreie Stadt	Mainz	55129	49.9661	8.2663		20I (Alpha, V1)	B.1.1.7	false	false	false	false	false	false	false	false	false
6166ba5b81e18c1c41ced677	1025083376	IIMK	ncov	Human	B.1.1.7	20I (Alpha, V1)	2021-04-28	Europe	Germany	Thuringia	Landkreis Saale-Holzland-Kreis	Kahla	7768	50.802	11.5882	161	20I (Alpha, V1)	B.1.1.7	false	false	false	false	false	false	false	false	false
IMS-10004-CVDP-00126		RKI	ncov	Human	B.1.1.7	20I (Alpha, V1)	2021-01-21	Europe	Germany	Schleswig-Holstein	Kreis Herzogtum Lauenburg	Kreis Herzogtum Lauenburg	21502	53.5966	10.5762		20I (Alpha, V1)	B.1.1.7	false	false	false	false	false	false	false	false	false
IMS-10294-CVDP-19349C18-BAB1-4216-8E6C-4960646908AD		RKI	ncov	Human	B.1.1.7	20I (Alpha, V1)	2021-03-14	Europe	Germany	Nordrhein-Westfalen	Landkreis Düsseldorf; Stadt	Düsseldorf	40477	51.2371	6.7795		20I (Alpha, V1)	B.1.1.7	false	false	false	false	false	false	false	false	false
IMS-10565-CVDP-513F497E-E716-4440-B203-956CAABD1419		RKI	ncov	Human	B.1.1.7	20I (Alpha, V1)	2021-04-03	Europe	Germany	Hamburg	Landkreis Hamburg; Freie und Hansestadt	Hamburg	20095	53.5722	10.0031		20I (Alpha, V1)	B.1.1.7	false	false	false	false	false	false	false	false	false
IMS-10013-CVDP-43DF3CB9-307E-4FBC-B325-F28DFB182DC1		RKI	ncov	Human	B.1.1.7	20I (Alpha, V1)	2021-04-20	Europe	Germany	Saarland	Landkreis Saarpfalz-Kreis	Sankt Ingbert	66386	49.277	7.1167		20I (Alpha, V1)	B.1.1.7	false	false	false	false	false	false	false	false	false
IMS-10294-CVDP-CDE53D4B-E194-408A-8E54-FB5993D7F101		RKI	ncov	Human	B.1.1.7	20I (Alpha, V1)	2021-05-04	Europe	Germany	Nordrhein-Westfalen	Landkreis Düsseldorf; Stadt	Düsseldorf	40477	51.2371	6.7795		20I (Alpha, V1)	B.1.1.7	false	false	false	false	false	false	false	false	false
IMS-10117-CVDP-D4AB4F31-C019-4372-9CDB-EF2BC812B35E		RKI	ncov	Human	B.1.1.7	20I (Alpha, V1)	2021-04-12	Europe	Germany	Rheinland-Pfalz	Landkreis Neustadt an der Weinstraße; kreisfreie Stadt	Neustadt an der Weinstraße	67433	49.3465	8.1491		20I (Alpha, V1)	B.1.1.7	false	false	false	false	false	false	false	false	false
IMS-10020-CVDP-98430ECA-9AF0-4261-BB7E-6FF3B7754C83		RKI	ncov	Human	B.1.1.7	20I (Alpha, V1)	2021-03-06	Europe	Germany	Bayern	Landkreis Weiden i.d.OPf.	Weiden	92637	49.6768	12.1561		20I (Alpha, V1)	B.1.1.7	false	false	false	false	false	false	false	false	false
6166ba5b81e18c1c41cecba8	1091354792	IIMK	ncov	Human	B.1.1.7	20I (Alpha, V1)	2021-05-14	Europe	Germany	Thuringia	Landkreis Eisenach	Eisenach	99817	50.9757	10.3201	0	20I (Alpha, V1)	B.1.1.7	false	false	false	false	false	false	false	false	false
6166ba5b81e18c1c41ced3a3	1050211655	IIMK	ncov	Human	B.1.1.7	20I (Alpha, V1)	2021-04-20	Europe	Germany	Thuringia	Landkreis Altenburger Land	Schmölln	4626	50.8953	12.3497	0	20I (Alpha, V1)	B.1.1.7	false	false	false	false	false	false	false	false	false
IMS-10261-CVDP-F7E90E8C-468D-48BB-B5D9-33C0B7954888		RKI	ncov	Human	B.1.1.7	20I (Alpha, V1)	2021-03-09	Europe	Germany	Nordrhein-Westfalen	Landkreis Lippe	Bad Salzuflen	32105	52.0808	8.7505		20I (Alpha, V1)	B.1.1.7	false	false	false	false	false	false	false	false	false
IMS-10082-CVDP-67430C82-9A71-4ACA-B037-6AFBC29BBD9F		RKI	ncov	Human	B.1.1.7	20I (Alpha, V1)	2021-05-04	Europe	Germany	Nordrhein-Westfalen	Landkreis Bochum; Stadt	Bochum	44879	51.4271	7.1543		20I (Alpha, V1)	B.1.1.7	false	false	false	false	false	false	false	false	false
IMS-10294-CVDP-538		RKI	ncov	Human	B.1.1.7	20I (Alpha, V1)	2021-02-02	Europe	Germany	Nordrhein-Westfalen	Landkreis Düsseldorf; Stadt	Düsseldorf	40477	51.2371	6.7795		20I (Alpha, V1)	B.1.1.7	false	false	false	false	false	false	false	false	false
IMS-10186-CVDP-7B66556C-2CD8-43B7-87E9-9CCC883FF897		RKI	ncov	Human	B.1.1.7	20I (Alpha, V1)	2021-02-09	Europe	Germany	Nordrhein-Westfalen	Landkreis Düsseldorf; Stadt	Düsseldorf	40210	51.2216	6.7897		20I (Alpha, V1)	B.1.1.7	false	false	false	false	false	false	false	false	false
IMS-10013-CVDP-B42B1CF0-F16D-4BB7-9A26-3C5444E207E6		RKI	ncov	Human	B.1.1.7	20I (Alpha, V1)	2021-03-19	Europe	Germany	Hamburg	Landkreis Hamburg; Freie und Hansestadt	Hamburg	21079	53.5722	10.0031		20I (Alpha, V1)	B.1.1.7	false	false	false	false	false	false	false	false	false
IMS-10122-CVDP-6B561A0E-372B-4B89-9AE7-BD42B49101C7		RKI	ncov	Human	B.1.1.7	20I (Alpha, V1)	2021-04-16	Europe	Germany	Baden-Württemberg	Landkreis Karlsruhe	Karlsruhe	76131	49.0078	8.4199		20I (Alpha, V1)	B.1.1.7	false	false	false	false	false	false	false	false	false
IMS-10023-CVDP-1A85D968-D172-418F-B396-7BE3FB1ABD72		RKI	ncov	Human	B.1.1.7	20I (Alpha, V1)	2021-02-09	Europe	Germany	Sachsen	Landkreis Erzgebirgskreis	Neukirchen/Erzgebirge	9221	50.7835	12.87		20I (Alpha, V1)	B.1.1.7	false	false	false	false	false	false	false	false	false
IMS-10116-CVDP-D5D35C73-80C7-4448-9A67-5D95A37F206F		RKI	ncov	Human	B.1.1.7	20I (Alpha, V1)	2021-03-09	Europe	Germany	Berlin	Landkreis Berlin; Stadt	Berlin	13407	52.5727	13.3512		20I (Alpha, V1)	B.1.1.7	false	false	false	false	false	false	false	false	false
IMS-10338-CVDP-0430E85A-900F-4652-9DF9-623A2F130FA6		RKI	ncov	Human	B.1.1.7	20I (Alpha, V1)	2021-02-25	Europe	Germany	Hessen	Landkreis Darmstadt; Wissenschaftsstadt	Darmstadt	64283	49.8719	8.6484		20I (Alpha, V1)	B.1.1.7	false	false	false	false	false	false	false	false	false
IMS-10218-CVDP-422E7ED3-01EA-4921-B9F8-B0C037D30555		RKI	ncov	Human	B.1.1.7	20I (Alpha, V1)	2021-03-30	Europe	Germany	Sachsen-Anhalt	Landkreis Landeshauptstadt Magdeburg	Magdeburg	39104	52.1243	11.6322		20I (Alpha, V1)	B.1.1.7	false	false	false	false	false	false	false	false	false
IMS-10013-CVDP-94C7CF2F-BAB1-471F-AE90-30CE880A22F3		RKI	ncov	Human	B.1.1.7	20I (Alpha, V1)	2021-04-09	Europe	Germany	Sachsen	Landkreis Meißen	Landkreis Meißen	1665	51.2393	13.4717		20I (Alpha, V1)	B.1.1.7	false	false	false	false	false	false	false	false	false
IMS-10020-CVDP-4D0AADC3-D374-4A28-A443-DFCFD27F0102		RKI	ncov	Human	B.1.1.7	20I (Alpha, V1)	2021-04-14	Europe	Germany	Baden-Württemberg	Landkreis Esslingen	Leinfelden-Echterdingen	70771	48.6941	9.1681		20I (Alpha, V1)	B.1.1.7	false	false	false	false	false	false	false	false	false
IMS-10036-CVDP-3D6ED76B-4CB0-4B0C-910C-D8695C80C34A		RKI	ncov	Human	B.1.1.7	20I (Alpha, V1)	2021-03-12	Europe	Germany	Berlin	Landkreis Berlin; Stadt	Berlin	12247	52.4395	13.3462		20I (Alpha, V1)	B.1.1.7	false	false	false	false	false	false	false	false	false
IMS-10013-CVDP-C2F4D246-8E00-4914-A7E2-226487C72824		RKI	ncov	Human	B.1.1.7	20I (Alpha, V1)	2021-02-20	Europe	Germany	Nordrhein-Westfalen	Landkreis Bochum; Stadt	Bochum	44799	51.4509	7.2388		20I (Alpha, V1)	B.1.1.7	false	false	false	false	false	false	false	false	false
IMS-10267-CVDP-5670ABDA-E585-4030-AD66-BF8CF2DC3A0A		RKI	ncov	Human	B.1.1.7	20I (Alpha, V1)	2021-03-11	Europe	Germany	Nordrhein-Westfalen	Landkreis Dortmund; Stadt	Dortmund	44137	51.5097	7.4601		20I (Alpha, V1)	B.1.1.7	false	false	false	false	false	false	false	false	false
IMS-10116-CVDP-B1EEBA89-1E20-4EF1-90E9-D39E15C8B280		RKI	ncov	Human	B.1.1.7	20I (Alpha, V1)	2021-03-04	Europe	Germany	Sachsen	Kreisfreie Stadt Dresden	Dresden	1067	51.0628	13.7297		20I (Alpha, V1)	B.1.1.7	false	false	false	false	false	false	false	false	false
6166b85c81e18c1c41cec828	IMS-10013-CVDP-84e53946-aebb-4c96-bb83-5c1f252150c8	IIMK	ncov	Human	B.1.1.7	20I (Alpha, V1)	2021-04-26	Europe	Germany	Thuringia	Landkreis Greiz	Berga/Elster	7980	50.7503	12.1607	30	20I (Alpha, V1)	B.1.1.7	false	false	false	false	false	false	false	false	false
IMS-10150-CVDP-7BC18149-186F-4EAD-A3C5-224C3D263C94		RKI	ncov	Human	B.1.1.7	20I (Alpha, V1)	2021-05-04	Europe	Germany	Nordrhein-Westfalen	Landkreis Leverkusen; Stadt	Leverkusen	51375	51.0331	7.052		20I (Alpha, V1)	B.1.1.7	false	false	false	false	false	false	false	false	false
6166ba5b81e18c1c41ced41f	1028313905	IIMK	ncov	Human	B.1.1.7	20I (Alpha, V1)	2021-04-21	Europe	Germany	Thuringia	Landkreis Ilm-Kreis	Arnstadt	99310	50.8343	10.9456	0	20I (Alpha, V1)	B.1.1.7	false	false	false	false	false	false	false	false	false
IMS-10020-CVDP-64419B24-E4DC-4807-98E4-5A7A80E772C2		RKI	ncov	Human	B.1.1.7	20I (Alpha, V1)	2021-02-12	Europe	Germany	Bayern	Landkreis Weiden i.d.OPf.	Weiden	92637	49.6768	12.1561		20I (Alpha, V1)	B.1.1.7	false	false	false	false	false	false	false	false	false
IMS-10122-CVDP-82675017-B96B-4832-9261-37C489F81667		RKI	ncov	Human	B.1.1.7	20I (Alpha, V1)	2021-03-20	Europe	Germany	Brandenburg	Kreisfreie Stadt Cottbus	Cottbus	3050	51.7324	14.3347		20I (Alpha, V1)	B.1.1.7	false	false	false	false	false	false	false	false	false
IMS-10587-CVDP-24443BBD-CFA3-4A51-ACDF-3C01BB550702		RKI	ncov	Human	B.1.1.7	20I (Alpha, V1)	2021-03-21	Europe	Germany	Hamburg	Landkreis Hamburg; Freie und Hansestadt	Hamburg	20095	53.5722	10.0031		20I (Alpha, V1)	B.1.1.7	false	false	false	false	false	false	false	false	false
6166ba5c81e18c1c41ced8b4	1000420865	IIMK	ncov	Human	B.1.1.7	20I (Alpha, V1)	2021-03-05	Europe	Germany	Thuringia	Landkreis Erfurt; Stadt	Erfurt	99084	50.9775	11.0251	56	20I (Alpha, V1)	B.1.1.7	false	false	false	false	false	false	false	false	false
IMS-10150-CVDP-7078BBD6-9745-478D-AA1A-B01EB6D090F5		RKI	ncov	Human	B.1.1.7	20I (Alpha, V1)	2021-04-22	Europe	Germany	Nordrhein-Westfalen	Landkreis Leverkusen; Stadt	Leverkusen	51375	51.0331	7.052		20I (Alpha, V1)	B.1.1.7	false	false	false	false	false	false	false	true	false
IMS-10020-CVDP-345D3A6C-5837-4CE3-A0DD-995C964B79C7		RKI	ncov	Human	B.1.1.7	20I (Alpha, V1)	2021-04-20	Europe	Germany	Baden-Württemberg	Landkreis Esslingen	Leinfelden-Echterdingen	70771	48.6941	9.1681		20I (Alpha, V1)	B.1.1.7	false	false	false	false	false	false	false	false	false
IMS-10203-CVDP-C5358837-F9E1-40BD-9F00-C5166FE4F1F0		RKI	ncov	Human	B.1.1.7	20I (Alpha, V1)	2021-02-19	Europe	Germany	Hamburg	Landkreis Hamburg; Freie und Hansestadt	Hamburg	20095	53.5722	10.0031		20I (Alpha, V1)	B.1.1.7	false	false	false	false	false	false	false	false	false
IMS-10020-CVDP-EFF2594D-7860-4E94-94EA-14C5782BA7C8		RKI	ncov	Human	B.1.1.7	20I (Alpha, V1)	2021-04-14	Europe	Germany	Rheinland-Pfalz	Landkreis Trier; kreisfreie Stadt	Trier	54290	49.7537	6.6393		20I (Alpha, V1)	B.1.1.7	false	false	false	false	false	false	false	false	false
6166ba5c81e18c1c41ced8b5	1000420872	IIMK	ncov	Human	B.1.1.7	20I (Alpha, V1)	2021-03-05	Europe	Germany	Thuringia	Landkreis Erfurt; Stadt	Erfurt	99084	50.9775	11.0251	56	20I (Alpha, V1)	B.1.1.7	false	false	false	false	false	false	false	false	true
IMS-10013-CVDP-2139BA4A-AD53-48B0-B533-FEC5556F5BBA		RKI	ncov	Human	B.1.1.7	20I (Alpha, V1)	2021-03-16	Europe	Germany	Sachsen	Landkreis Nordsachsen	Wermsdorf	4779	51.2833	12.95		20I (Alpha, V1)	B.1.1.7	false	false	false	false	false	false	false	false	false
IMS-10267-CVDP-749807BD-9769-444A-822E-1FACAB87B837		RKI	ncov	Human	B.1.1.7	20I (Alpha, V1)	2021-03-08	Europe	Germany	Schleswig-Holstein	Landkreis Lübeck; Hansestadt	Lübeck	23564	53.8705	10.6986		20I (Alpha, V1)	B.1.1.7	false	false	false	false	false	false	false	false	false
IMS-10020-CVDP-9978C9DB-1C4F-4DC2-91DC-AD83B8A200C0		RKI	ncov	Human	B.1.1.7	20I (Alpha, V1)	2021-04-10	Europe	Germany	Nordrhein-Westfalen	Landkreis Leverkusen; Stadt	Leverkusen	51375	51.0331	7.052		20I (Alpha, V1)	B.1.1.7	false	false	false	false	false	false	false	false	false
IMS-10013-CVDP-40496250-EB3A-4FDC-9BC6-CA6E03A458D3		RKI	ncov	Human	B.1.1.7	20I (Alpha, V1)	2021-02-26	Europe	Germany	Hamburg	Landkreis Hamburg; Freie und Hansestadt	Hamburg	21079	53.5722	10.0031		20I (Alpha, V1)	B.1.1.7	false	false	false	false	false	false	false	false	false
IMS-10122-CVDP-A7F8C9EB-F98C-4BA9-BEDA-01F60A9CFC94		RKI	ncov	Human	B.1.1.7	20I (Alpha, V1)	2021-03-08	Europe	Germany	Baden-Württemberg	Landkreis Karlsruhe	Karlsruhe	76131	49.0078	8.4199		20I (Alpha, V1)	B.1.1.7	false	false	false	false	false	false	false	false	false
IMS-10117-CVDP-071AECCD-4B98-4002-91FE-4FA817A86136		RKI	ncov	Human	B.1.1.7	20I (Alpha, V1)	2021-03-29	Europe	Germany	Baden-Württemberg	Landkreis Rhein-Neckar-Kreis	Eppelheim	69214	49.4019	8.6364		20I (Alpha, V1)	B.1.1.7	false	false	false	false	false	false	false	false	false
IMS-10020-CVDP-69D515C0-599D-45B3-933D-947C9749A9CE		RKI	ncov	Human	B.1.1.7	20I (Alpha, V1)	2021-02-19	Europe	Germany	Bayern	Landkreis Weiden i.d.OPf.	Weiden	92637	49.6768	12.1561		20I (Alpha, V1)	B.1.1.7	false	false	false	false	false	false	false	false	false
IMS-10117-CVDP-7BFF54E5-DE90-4579-9EAD-FA569A46959A		RKI	ncov	Human	B.1.1.7	20I (Alpha, V1)	2021-03-12	Europe	Germany	Baden-Württemberg	Landkreis Karlsruhe	Ettlingen	76275	48.9409	8.4076		20I (Alpha, V1)	B.1.1.7	false	false	false	false	false	false	false	false	false
IMS-10122-CVDP-35B82914-B9F4-48EC-AE04-9C6F998B7896		RKI	ncov	Human	B.1.1.7	20I (Alpha, V1)	2021-04-24	Europe	Germany	Brandenburg	Kreisfreie Stadt Cottbus	Cottbus	3050	51.7324	14.3347		20I (Alpha, V1)	B.1.1.7	false	false	false	false	false	false	false	false	false
6166ba5c81e18c1c41cede3c	1050180465	IIMK	ncov	Human	B.1.1.7	20I (Alpha, V1)	2021-03-22	Europe	Germany	Thuringia	Landkreis Greiz	Ronneburg	7580	50.8628	12.1813	123	20I (Alpha, V1)	B.1.1.7	false	false	false	false	false	false	false	false	false
IMS-10122-CVDP-4238859F-785B-4C4F-A8EE-F413FD6722EF		RKI	ncov	Human	B.1.1.7	20I (Alpha, V1)	2021-04-01	Europe	Germany	Baden-Württemberg	Landkreis Karlsruhe	Karlsruhe	76131	49.0078	8.4199		20I (Alpha, V1)	B.1.1.7	false	false	false	false	false	false	false	false	false
IMS-10013-CVDP-53D75422-CF49-4041-A401-E156FAC55F79		RKI	ncov	Human	B.1.1.7	20I (Alpha, V1)	2021-03-11	Europe	Germany	Berlin	Landkreis Berlin; Stadt	Berlin	14197	52.4734	13.3118		20I (Alpha, V1)	B.1.1.7	false	false	false	false	false	false	false	false	false
IMS-10013-CVDP-C25CFFE2-DB7D-4919-A719-618FA9AE70C9		RKI	ncov	Human	B.1.1.7	20I (Alpha, V1)	2021-03-19	Europe	Germany	Niedersachsen	Landkreis Region Hannover	Hannover	30163	52.3943	9.7475		20I (Alpha, V1)	B.1.1.7	false	false	false	false	false	false	false	false	false
IMS-10203-CVDP-DB48814E-A607-4C99-A381-C4C700E28269		RKI	ncov	Human	B.1.1.7	20I (Alpha, V1)	2021-04-27	Europe	Germany	Hamburg	Landkreis Hamburg; Freie und Hansestadt	Hamburg	20095	53.5722	10.0031		20I (Alpha, V1)	B.1.1.7	false	false	false	false	false	false	false	false	false
IMS-10146-CVDP-A61406DB-766A-4EA3-AC61-B7AAD43CAF6D		RKI	ncov	Human	B.1.1.7	20I (Alpha, V1)	2021-04-30	Europe	Germany	Baden-Württemberg	Landkreis Ulm; Stadt	Ulm	89073	48.4015	9.9927		20I (Alpha, V1)	B.1.1.7	false	false	false	false	false	false	false	false	false
IMS-10013-CVDP-5A069349-A4D2-4E3A-BCA6-10DC6A7598FA		RKI	ncov	Human	B.1.1.7	20I (Alpha, V1)	2021-04-07	Europe	Germany	Sachsen	Landkreis Nordsachsen	Wermsdorf	4779	51.2833	12.95		20I (Alpha, V1)	B.1.1.7	false	false	false	false	false	false	false	false	false
IMS-10150-CVDP-D49EBF00-678E-4B9F-B972-06CAD69D7254		RKI	ncov	Human	B.1.1.7	20I (Alpha, V1)	2021-05-02	Europe	Germany	Bayern	Landkreis Augsburg; Stadt	Augsburg	86156	48.3815	10.8548		20I (Alpha, V1)	B.1.1.7	false	false	false	false	false	false	false	false	false
IMS-10150-CVDP-9CF46600-CFE0-40EE-A273-561A468C7454		RKI	ncov	Human	B.1.1.7	20I (Alpha, V1)	2021-04-27	Europe	Germany	Rheinland-Pfalz	Landkreis Trier; kreisfreie Stadt	Trier	54290	49.7537	6.6393		20I (Alpha, V1)	B.1.1.7	false	false	false	false	false	false	false	false	false
IMS-10020-CVDP-28110B0C-A5C3-4B33-B79A-33F32E2B6728		RKI	ncov	Human	B.1.1.7	20I (Alpha, V1)	2021-04-01	Europe	Germany	Rheinland-Pfalz	Landkreis Trier; kreisfreie Stadt	Trier	54290	49.7537	6.6393		20I (Alpha, V1)	B.1.1.7	false	false	false	false	false	false	false	false	false
IMS-10261-CVDP-39C51CE1-C5EE-4D4C-B140-BAF165A80B78		RKI	ncov	Human	B.1.1.7	20I (Alpha, V1)	2021-04-27	Europe	Germany	Nordrhein-Westfalen	Landkreis Lippe	Bad Salzuflen	32105	52.0808	8.7505		20I (Alpha, V1)	B.1.1.7	false	false	false	false	false	false	false	false	false
6166ba5c81e18c1c41ced9f6	1091291754	IIMK	ncov	Human	B.1.1.7	20I (Alpha, V1)	2021-03-11	Europe	Germany	Thuringia	Landkreis Ilm-Kreis	Arnstadt	99310	50.8343	10.9456	104	20I (Alpha, V1)	B.1.1.7	false	false	false	false	false	false	false	false	false
IMS-10020-CVDP-24E6879A-2E35-493C-8FD0-F597EC853D7C		RKI	ncov	Human	B.1.1.7	20I (Alpha, V1)	2021-04-13	Europe	Germany	Rheinland-Pfalz	Landkreis Trier; kreisfreie Stadt	Trier	54290	49.7537	6.6393		20I (Alpha, V1)	B.1.1.7	false	false	false	false	false	false	false	false	false
IMS-10116-CVDP-AE61D6A9-B1B3-49DA-92B9-82EB5ED2557B		RKI	ncov	Human	B.1.1.7	20I (Alpha, V1)	2021-03-31	Europe	Germany	Baden-Württemberg	Landkreis Heidelberg	Heidelberg	69126	49.3757	8.6911		20I (Alpha, V1)	B.1.1.7	false	false	false	false	false	false	false	false	false
IMS-10013-CVDP-81B83FEB-D4BD-442A-A3ED-E72DBCD84EE3		RKI	ncov	Human	B.1.1.7	20I (Alpha, V1)	2021-04-01	Europe	Germany	Sachsen	Landkreis Nordsachsen	Wermsdorf	4779	51.2833	12.95		20I (Alpha, V1)	B.1.1.7	false	false	false	false	false	false	false	false	false
IMS-10117-CVDP-E2A97D8A-46F9-4BA3-8DCD-2CDCE77666B6		RKI	ncov	Human	B.1.1.7	20I (Alpha, V1)	2021-03-09	Europe	Germany	Baden-Württemberg	Landkreis Rhein-Neckar-Kreis	Eppelheim	69214	49.4019	8.6364		20I (Alpha, V1)	B.1.1.7	false	false	false	false	false	false	false	false	false
IMS-10116-CVDP-39713963-1C26-4D77-9862-1E84948C180D		RKI	ncov	Human	B.1.1.7	20I (Alpha, V1)	2021-02-03	Europe	Germany	Niedersachsen	Landkreis Region Hannover	Hannover	30519	52.3398	9.7743		20I (Alpha, V1)	B.1.1.7	false	false	false	false	false	false	false	false	false
IMS-10004-CVDP-242A31C1-72E6-4D4B-9524-60C351A0D52B		RKI	ncov	Human	B.1.1.7	20I (Alpha, V1)	2021-04-01	Europe	Germany	Schleswig-Holstein	Kreis Herzogtum Lauenburg	Kreis Herzogtum Lauenburg	21502	53.5966	10.5762		20I (Alpha, V1)	B.1.1.7	false	false	false	false	false	false	false	false	false
6166ba5b81e18c1c41cece47	1091318062	IIMK	ncov	Human	B.1.1.7	20I (Alpha, V1)	2021-04-06	Europe	Germany	Thuringia	Landkreis Jena; Stadt	Jena	7743	50.9283	11.5853	196	20I (Alpha, V1)	B.1.1.7	false	false	false	false	false	false	false	false	false
IMS-10036-CVDP-CA1A3950-88AC-47D1-ADCC-660C64F678AD		RKI	ncov	Human	B.1.1.7	20I (Alpha, V1)	2021-03-09	Europe	Germany	Berlin	Landkreis Berlin; Stadt	Berlin	12247	52.4395	13.3462		20I (Alpha, V1)	B.1.1.7	false	false	false	false	false	false	false	false	false
IMS-10013-CVDP-2BBA5013-DEF9-4B1E-8A22-8E61DF6805AD		RKI	ncov	Human	B.1.1.7	20I (Alpha, V1)	2021-03-11	Europe	Germany	Hessen	Landkreis Kassel; documenta-Stadt	Kassel	34119	51.3152	9.4647		20I (Alpha, V1)	B.1.1.7	false	false	false	false	false	false	false	false	true
6166ba5c81e18c1c41cedbfc	1091299532	IIMK	ncov	Human	B.1.1.7	20I (Alpha, V1)	2021-03-17	Europe	Germany	Thuringia	Landkreis Ilm-Kreis	Arnstadt	99310	50.8343	10.9456	501	20I (Alpha, V1)	B.1.1.7	false	false	false	false	false	false	false	false	false
IMS-10013-CVDP-E5324B40-20E2-4A17-9365-1F50E5899345		RKI	ncov	Human	B.1.1.7	20I (Alpha, V1)	2021-04-08	Europe	Germany	Saarland	Landkreis Saarpfalz-Kreis	Sankt Ingbert	66386	49.277	7.1167		20I (Alpha, V1)	B.1.1.7	false	false	false	false	false	false	false	false	false
IMS-10295-CVDP-E0D9EC44-3634-4680-AE84-F4904096D782		RKI	ncov	Human	B.1.1.7	20I (Alpha, V1)	2021-02-04	Europe	Germany	Niedersachsen	Landkreis Region Hannover	Hannover	30623	52.3795	9.8075		20I (Alpha, V1)	B.1.1.7	false	false	false	false	false	false	false	false	false
IMS-10013-CVDP-D39E91E2-14B7-44B4-A841-A1197027AB04		RKI	ncov	Human	B.1.1.7	20I (Alpha, V1)	2021-03-26	Europe	Germany	Baden-Württemberg	Landkreis Stuttgart	Stuttgart	70376	48.7728	9.18184		20I (Alpha, V1)	B.1.1.7	false	false	false	false	false	false	false	false	false
6166ba5b81e18c1c41cecf9c	1091320986	IIMK	ncov	Human	B.1.1.7	20I (Alpha, V1)	2021-04-08	Europe	Germany	Thuringia	Landkreis Jena; Stadt	Jena	7751	50.9283	11.5853	201	20I (Alpha, V1)	B.1.1.7	false	true	false	false	false	false	false	true	false
IMS-10004-CVDP-08F43526-814B-48F9-A8A2-B4BF077144AF		RKI	ncov	Human	B.1.1.7	20I (Alpha, V1)	2021-03-31	Europe	Germany	Schleswig-Holstein	Kreis Herzogtum Lauenburg	Kreis Herzogtum Lauenburg	21502	53.5966	10.5762		20I (Alpha, V1)	B.1.1.7	false	false	false	false	false	false	false	false	false
IMS-10215-CVDP-9FB5AE14-C6DB-4AE2-878A-9703528E3242		RKI	ncov	Human	B.1.1.7	20I (Alpha, V1)	2021-04-18	Europe	Germany	Sachsen	Kreisfreie Stadt Leipzig	Leipzig	4103	51.3405	12.3827		20I (Alpha, V1)	B.1.1.7	false	false	false	false	true	false	false	false	false
605b4607d5323d75966f97a5	vi045434	IIMK	ncov	Human	B.1.1.7	20I (Alpha, V1)	2021-03-16	Europe	Germany	Thuringia	Landkreis Saale-Holzland-Kreis	Camburg	7774	51.0514	11.7055	189	20I (Alpha, V1)	B.1.1.7	false	false	false	false	false	false	false	false	false
IMS-10116-CVDP-F6984CC0-5D63-4622-BE90-71A05D27989A		RKI	ncov	Human	B.1.1.7	20I (Alpha, V1)	2021-03-25	Europe	Germany	Sachsen	Kreisfreie Stadt Dresden	Dresden	1067	51.0628	13.7297		20I (Alpha, V1)	B.1.1.7	false	true	false	false	false	false	false	true	false
IMS-10213-CVDP-892E8D49-4806-49BA-A872-FF3380ECD73D		RKI	ncov	Human	B.1.1.7	20I (Alpha, V1)	2021-03-29	Europe	Germany	Sachsen	Kreisfreie Stadt Dresden	Dresden	1067	51.0628	13.7297		20I (Alpha, V1)	B.1.1.7	false	false	false	false	false	false	false	false	false
IMS-10375-CVDP-FCE9F634-5AF7-494C-9E3C-143BD7282789		RKI	ncov	Human	B.1.1.7	20I (Alpha, V1)	2021-03-01	Europe	Germany	Baden-Württemberg	Landkreis Mannheim	Mannheim	68167	49.4996	8.4939		20I (Alpha, V1)	B.1.1.7	false	false	false	false	false	false	false	false	false
IMS-10116-CVDP-0B5DCBA3-E522-454C-93E2-84A903ED7F93		RKI	ncov	Human	B.1.1.7	20I (Alpha, V1)	2021-02-26	Europe	Germany	Berlin	Landkreis Berlin; Stadt	Berlin	13407	52.5727	13.3512		20I (Alpha, V1)	B.1.1.7	false	false	false	false	false	false	false	false	false
IMS-10117-CVDP-F43DAA3C-E7E5-4BE9-BAB5-63FA966EF23D		RKI	ncov	Human	B.1.1.7	20I (Alpha, V1)	2021-03-20	Europe	Germany	Baden-Württemberg	Landkreis Rhein-Neckar-Kreis	Eppelheim	69214	49.4019	8.6364		20I (Alpha, V1)	B.1.1.7	false	false	false	false	false	false	false	true	false
IMS-10117-CVDP-D91B9E0C-782C-42DC-B9AE-BF91472065C6		RKI	ncov	Human	B.1.1.7	20I (Alpha, V1)	2021-03-12	Europe	Germany	Baden-Württemberg	Landkreis Karlsruhe	Ettlingen	76275	48.9409	8.4076		20I (Alpha, V1)	B.1.1.7	false	false	false	false	false	false	false	false	false
IMS-10020-CVDP-CC8E383F-40E7-4C84-9E44-6F0928F25100		RKI	ncov	Human	B.1.1.7	20I (Alpha, V1)	2021-03-29	Europe	Germany	Baden-Württemberg	Landkreis Esslingen	Leinfelden-Echterdingen	70771	48.6941	9.1681		20I (Alpha, V1)	B.1.1.7	false	false	false	false	false	false	false	false	false
IMS-10020-CVDP-BA4BEEC0-0C80-4B20-B430-BAA35D7298DF		RKI	ncov	Human	B.1.1.7	20I (Alpha, V1)	2021-03-31	Europe	Germany	Rheinland-Pfalz	Landkreis Trier; kreisfreie Stadt	Trier	54290	49.7537	6.6393		20I (Alpha, V1)	B.1.1.7	false	false	false	false	false	false	false	false	false
IMS-10082-CVDP-E152474A-6846-4958-A027-DC4F10FA1A67		RKI	ncov	Human	B.1.1.7	20I (Alpha, V1)	2021-04-07	Europe	Germany	Nordrhein-Westfalen	Landkreis Bochum; Stadt	Bochum	44879	51.4271	7.1543		20I (Alpha, V1)	B.1.1.7	false	false	false	false	false	false	false	false	false
IMS-10020-CVDP-22801A2F-7613-4651-9FFB-BD40DC2A794B		RKI	ncov	Human	B.1.1.7	20I (Alpha, V1)	2021-03-23	Europe	Germany	Rheinland-Pfalz	Landkreis Trier; kreisfreie Stadt	Trier	54290	49.7537	6.6393		20I (Alpha, V1)	B.1.1.7	false	false	false	false	false	false	false	false	false
IMS-10117-CVDP-C63AB61C-3DF7-47FA-911D-A410C9D0206B		RKI	ncov	Human	B.1.1.7	20I (Alpha, V1)	2021-03-22	Europe	Germany	Baden-Württemberg	Landkreis Rhein-Neckar-Kreis	Eppelheim	69214	49.4019	8.6364		20I (Alpha, V1)	B.1.1.7	false	false	false	false	false	false	false	false	false
IMS-10117-CVDP-A826D0EB-EB57-47F2-B60E-7FAF68B1485B		RKI	ncov	Human	Q.1	20I (Alpha, V1)	2021-03-05	Europe	Germany	Nordrhein-Westfalen	Landkreis Leverkusen; Stadt	Leverkusen	51375	51.0331	7.052		20I (Alpha, V1)	Q.1	false	false	false	false	false	false	false	false	false
IMS-10013-CVDP-3D3567C5-3E51-44AF-B1B3-516333281412		RKI	ncov	Human	B.1.1.7	20I (Alpha, V1)	2021-03-30	Europe	Germany	Saarland	Landkreis Saarpfalz-Kreis	Sankt Ingbert	66386	49.277	7.1167		20I (Alpha, V1)	B.1.1.7	false	false	false	false	false	false	false	false	false
IMS-10117-CVDP-EB68D896-BCCE-41B2-9219-DC43E5F81998		RKI	ncov	Human	B.1.1.7	20I (Alpha, V1)	2021-04-17	Europe	Germany	Baden-Württemberg	Landkreis Rhein-Neckar-Kreis	Eppelheim	69214	49.4019	8.6364		20I (Alpha, V1)	B.1.1.7	false	false	false	false	false	false	false	false	false
6166ba5b81e18c1c41cec95f	1024465024	IIMK	ncov	Human	B.1.1.7	20I (Alpha, V1)	2021-05-03	Europe	Germany	Thuringia	Landkreis Weimarer Land	Grammetal	99428	50.9576	11.2199	0	20I (Alpha, V1)	B.1.1.7	false	false	false	false	false	false	false	false	false
IMS-10023-CVDP-7D3D271C-6088-4219-87A7-DDC128991EDE		RKI	ncov	Human	B.1.1.7	20I (Alpha, V1)	2021-02-22	Europe	Germany	Sachsen	Landkreis Erzgebirgskreis	Neukirchen/Erzgebirge	9221	50.7835	12.87		20I (Alpha, V1)	B.1.1.7	false	false	false	false	false	false	false	false	false
IMS-10370-CVDP-0C9A442C-F455-4335-8791-C1DE21A28A9D		RKI	ncov	Human	B.1.1.7	20I (Alpha, V1)	2021-04-16	Europe	Germany	Brandenburg	Kreisfreie Stadt Potsdam	Potsdam	14467	52.403	13.0626		20I (Alpha, V1)	B.1.1.7	false	false	false	false	false	false	false	false	false
IMS-10020-CVDP-883C5CE8-50AB-4B84-A024-7C676210DC65		RKI	ncov	Human	B.1.1.7	20I (Alpha, V1)	2021-03-26	Europe	Germany	Bayern	Landkreis Weiden i.d.OPf.	Weiden	92637	49.6768	12.1561		20I (Alpha, V1)	B.1.1.7	false	false	false	false	false	false	false	false	false
IMS-10327-CVDP-46365775-BC11-4D22-BA2B-046852DCB1E9		RKI	ncov	Human	B.1.1.7	20I (Alpha, V1)	2021-02-24	Europe	Germany	Bayern	Landkreis Ingolstadt	Ingolstadt	85051	48.7212	11.4096		20I (Alpha, V1)	B.1.1.7	false	false	false	false	false	false	false	false	false
IMS-10013-CVDP-01457		RKI	ncov	Human	B.1.1.7	20I (Alpha, V1)	2021-01-28	Europe	Germany	Bayern	Bayreuth; Stadt	Bayreuth	95448	49.9474	11.5993		20I (Alpha, V1)	B.1.1.7	false	false	false	false	false	false	false	false	false
IMS-10020-CVDP-FA270491-1352-4038-9DD2-E1FC28B956F7		RKI	ncov	Human	B.1.1.7	20I (Alpha, V1)	2021-04-13	Europe	Germany	Nordrhein-Westfalen	Landkreis Leverkusen; Stadt	Leverkusen	51375	51.0331	7.052		20I (Alpha, V1)	B.1.1.7	false	false	false	false	false	false	false	false	false
IMS-10020-CVDP-B3E601F1-FB27-4999-9322-8734C32F6B74		RKI	ncov	Human	B.1.1.7	20I (Alpha, V1)	2021-03-19	Europe	Germany	Rheinland-Pfalz	Landkreis Trier; kreisfreie Stadt	Trier	54290	49.7537	6.6393		20I (Alpha, V1)	B.1.1.7	false	false	false	false	false	false	false	false	false
6166ba5b81e18c1c41cecc2d	1091313017	IIMK	ncov	Human	B.1.1.7	20I (Alpha, V1)	2021-03-30	Europe	Germany	Thuringia	Landkreis Unstrut-Hainich-Kreis	Mühlhausen	99974	51.2088	10.459	69	20I (Alpha, V1)	B.1.1.7	false	false	false	false	false	false	false	false	false
IMS-10013-CVDP-3DA57F15-2825-4955-8749-28BDA0B8CB89		RKI	ncov	Human	B.1.1.7	20I (Alpha, V1)	2021-02-23	Europe	Germany	Baden-Württemberg	Landkreis Stuttgart	Stuttgart	70376	48.7728	9.18184		20I (Alpha, V1)	B.1.1.7	false	false	false	false	false	false	false	false	false
IMS-10122-CVDP-67DFAC87-81AD-49A6-ADD5-2069C2E57B16		RKI	ncov	Human	B.1.1.7	20I (Alpha, V1)	2021-02-15	Europe	Germany	Baden-Württemberg	Landkreis Karlsruhe	Karlsruhe	76131	49.0078	8.4199		20I (Alpha, V1)	B.1.1.7	false	false	false	false	false	false	false	false	false
IMS-10603-CVDP-97C15784-27DE-49E5-BBE3-157B3188E7E4		RKI	ncov	Human	B.1.1.7	20I (Alpha, V1)	2021-04-16	Europe	Germany	Saarland	Landkreis Saarpfalz-Kreis	Homburg	66424	49.3264	7.3387		20I (Alpha, V1)	B.1.1.7	false	false	false	false	false	false	false	false	false
IMS-10004-CVDP-EFBEC110-0751-4738-9600-C55A8EE63363		RKI	ncov	Human	B.1.1.7	20I (Alpha, V1)	2021-04-27	Europe	Germany	Schleswig-Holstein	Kreis Herzogtum Lauenburg	Kreis Herzogtum Lauenburg	21502	53.5966	10.5762		20I (Alpha, V1)	B.1.1.7	false	false	false	false	false	false	false	false	false
IMS-10117-CVDP-B309CE72-A7FC-4AF3-AB99-BA4F4DAC6902		RKI	ncov	Human	B.1.1.7	20I (Alpha, V1)	2021-03-22	Europe	Germany	Baden-Württemberg	Landkreis Karlsruhe	Ettlingen	76275	48.9409	8.4076		20I (Alpha, V1)	Q.7	false	false	false	false	false	false	false	false	false
IMS-10013-CVDP-7DADC041-AEDF-4531-A8D4-97DFD452162A		RKI	ncov	Human	B.1.1.7	20I (Alpha, V1)	2021-04-15	Europe	Germany	Sachsen	Landkreis Nordsachsen	Wermsdorf	4779	51.2833	12.95		20I (Alpha, V1)	B.1.1.7	false	false	false	false	false	false	false	false	false
IMS-10188-CVDP-B510DCA9-27D9-4213-B926-23282903E528		RKI	ncov	Human	B.1.1.7	20I (Alpha, V1)	2021-02-09	Europe	Germany	Baden-Württemberg	Landkreis Konstanz	Singen	78224	47.7593	8.8403		20I (Alpha, V1)	B.1.1.7	false	false	false	false	false	false	false	false	false
IMS-10186-CVDP-0EEA1A80-4400-4964-A764-56301FB8D4C5		RKI	ncov	Human	B.1.1.7	20I (Alpha, V1)	2021-03-13	Europe	Germany	Nordrhein-Westfalen	Landkreis Düsseldorf; Stadt	Düsseldorf	40210	51.2216	6.7897		20I (Alpha, V1)	B.1.1.7	false	false	false	false	false	false	false	false	false
IMS-10218-CVDP-05BD74C7-6C2B-4E9D-A296-D300ED41D678		RKI	ncov	Human	B.1.1.7	20I (Alpha, V1)	2021-03-22	Europe	Germany	Sachsen-Anhalt	Landkreis Landeshauptstadt Magdeburg	Magdeburg	39104	52.1243	11.6322		20I (Alpha, V1)	B.1.1.7	false	false	false	false	false	false	false	false	false
IMS-10186-CVDP-9D799850-9094-43F9-9BD8-607839D67D19		RKI	ncov	Human	B.1.1.7	20I (Alpha, V1)	2021-03-16	Europe	Germany	Nordrhein-Westfalen	Landkreis Düsseldorf; Stadt	Düsseldorf	40210	51.2216	6.7897		20I (Alpha, V1)	B.1.1.7	false	false	false	false	false	false	false	false	false
IMS-10013-CVDP-17B30989-C80F-4FCC-8012-CBAAE178BAD7		RKI	ncov	Human	B.1.1.7	20I (Alpha, V1)	2021-04-13	Europe	Germany	Sachsen	Landkreis Nordsachsen	Wermsdorf	4779	51.2833	12.95		20I (Alpha, V1)	B.1.1.7	false	false	false	false	false	false	false	false	false
IMS-10013-CVDP-658F4FE3-83A5-42B8-A7E8-8FC02DCCE1DA		RKI	ncov	Human	B.1.1.7	20I (Alpha, V1)	2021-02-23	Europe	Germany	Sachsen	Landkreis Nordsachsen	Wermsdorf	4779	51.2833	12.95		20I (Alpha, V1)	B.1.1.7	false	false	false	false	false	false	false	false	false
IMS-10116-CVDP-B310AC26-935F-431E-9EFD-A8F92CBB8C33		RKI	ncov	Human	B.1.1.7	20I (Alpha, V1)	2021-03-15	Europe	Germany	Baden-Württemberg	Landkreis Heidelberg	Heidelberg	69126	49.3757	8.6911		20I (Alpha, V1)	Q.7	false	false	false	false	false	false	false	false	false
IMS-10013-CVDP-D1EF928B-C050-4368-AD49-0E097A2BD473		RKI	ncov	Human	B.1.1.7	20I (Alpha, V1)	2021-03-04	Europe	Germany	Sachsen	Landkreis Meißen	Landkreis Meißen	1665	51.2393	13.4717		20I (Alpha, V1)	B.1.1.7	false	false	false	false	false	false	false	false	false
IMS-10061-CVDP-DFAACE62-D45D-478C-AB79-3A52E789D646		RKI	ncov	Human	B.1.1.7	20I (Alpha, V1)	2021-04-30	Europe	Germany	Nordrhein-Westfalen	Landkreis Bielefeld; Stadt	Bielefeld	33602	52.0245	8.5326		20I (Alpha, V1)	B.1.1.7	false	false	false	false	false	false	false	false	false
6166ba5b81e18c1c41cecd49	1024586550	IIMK	ncov	Human	B.1.1.7	20I (Alpha, V1)	2021-03-31	Europe	Germany	Thuringia	Landkreis Eichsfeld	Heiligenstadt	37308	51.378	10.1376	68	20I (Alpha, V1)	B.1.1.7	false	false	false	false	false	false	false	false	false
6166ba5b81e18c1c41cecd70	1027540698	IIMK	ncov	Human	B.1.1.7	20I (Alpha, V1)	2021-04-01	Europe	Germany	Thuringia	Landkreis Saale-Holzland-Kreis	Crossen	7613	50.9646	11.984	797	20I (Alpha, V1)	B.1.1.7	false	false	false	false	false	false	false	false	false
IMS-10061-CVDP-C3E19274-B9A9-46A5-8EDD-CD11D7867011		RKI	ncov	Human	B.1.1.7	20I (Alpha, V1)	2021-03-26	Europe	Germany	Sachsen-Anhalt	Kreisfreie Stadt Halle	Halle	6112	51.4753	11.9973		20I (Alpha, V1)	B.1.1.7	false	false	false	false	false	false	false	false	false
6166ba5b81e18c1c41ced39e	1029350604	IIMK	ncov	Human	B.1.1.7	20I (Alpha, V1)	2021-04-20	Europe	Germany	Thuringia	Landkreis Eichsfeld	Heiligenstadt	37308	51.378	10.1376	0	20I (Alpha, V1)	B.1.1.7	false	false	false	false	false	false	false	false	false
IMS-10020-CVDP-F87F4E26-1BC3-4BE7-A50F-61D71367DF30		RKI	ncov	Human	B.1.1.7	20I (Alpha, V1)	2021-03-31	Europe	Germany	Baden-Württemberg	Landkreis Esslingen	Leinfelden-Echterdingen	70771	48.6941	9.1681		20I (Alpha, V1)	B.1.1.7	false	false	false	false	false	false	false	false	false
IMS-10375-CVDP-039986B6-B536-4BDF-A8A3-31332DFE7EF7		RKI	ncov	Human	B.1.1.7	20I (Alpha, V1)	2021-04-30	Europe	Germany	Baden-Württemberg	Landkreis Heidelberg	Heidelberg	69120	49.4169	8.6764		20I (Alpha, V1)	B.1.1.7	false	false	false	false	false	false	false	false	false
IMS-10087-CVDP-3C904B83-A7AC-40D0-A640-2849129190AA		RKI	ncov	Human	B.1.1.7	20I (Alpha, V1)	2021-05-01	Europe	Germany	Nordrhein-Westfalen	Landkreis Köln; Stadt	Köln	50858	50.9243	6.8565		20I (Alpha, V1)	B.1.1.7	false	false	false	false	false	false	false	false	false
6166ba5b81e18c1c41cec9cc	1091343735	IIMK	ncov	Human	B.1.1.7	20I (Alpha, V1)	2021-05-02	Europe	Germany	Thuringia	Landkreis Ilm-Kreis	Arnstadt	99310	50.8343	10.9456	61	20I (Alpha, V1)	B.1.1.7	false	false	false	false	false	false	false	false	false
6040b371f7fbde3ec28b5bac	DN0175_19020851	IIMK	ncov	Human	B.1.1.7	20I (Alpha, V1)	2021-02-18	Europe	Germany	Thuringia	Landkreis Wartburgkreis	Dermbach	36466	50.7158	10.1198	189	20I (Alpha, V1)	B.1.1.7	false	false	false	false	false	false	false	false	false
6166ba5b81e18c1c41cecbab	1029410515	IIMK	ncov	Human	B.1.1.7	20I (Alpha, V1)	2021-05-12	Europe	Germany	Thuringia	Landkreis Kyffhäuserkreis	Sondershausen	99706	51.3677	10.8675	0	20I (Alpha, V1)	B.1.1.7	false	false	false	false	false	false	false	false	false
6166ba5b81e18c1c41ced5f2	1024550942	IIMK	ncov	Human	B.1.1.7	20I (Alpha, V1)	2021-04-27	Europe	Germany	Thuringia	Landkreis Sömmerda	Sömmerda	99610	51.1627	11.1157	0	20I (Alpha, V1)	B.1.1.7	false	false	false	false	false	false	false	false	true
IMS-10261-CVDP-8B44E237-D015-47C1-9D2A-2808FE72CB94		RKI	ncov	Human	B.1.1.7	20I (Alpha, V1)	2021-03-10	Europe	Germany	Nordrhein-Westfalen	Landkreis Lippe	Bad Salzuflen	32105	52.0808	8.7505		20I (Alpha, V1)	B.1.1.7	false	false	false	false	false	false	false	false	false
IMS-10197-CVDP-065F8113-E5C0-4497-B16B-C7F1EAE1CD8F		RKI	ncov	Human	B.1.1.7	20I (Alpha, V1)	2021-02-16	Europe	Germany	Sachsen-Anhalt	Landkreis Landeshauptstadt Magdeburg	Magdeburg	39124	52.1638	11.6333		20I (Alpha, V1)	B.1.1.7	false	false	false	false	false	false	false	false	false
IMS-10087-CVDP-9C532625-B800-4C0A-BF77-05E998253042		RKI	ncov	Human	B.1.1.7	20I (Alpha, V1)	2021-05-04	Europe	Germany	Nordrhein-Westfalen	Landkreis Köln; Stadt	Köln	50858	50.9243	6.8565		20I (Alpha, V1)	B.1.1.7	false	false	false	false	false	false	false	false	false
IMS-10150-CVDP-27175BB3-D153-4F23-A23E-01E80D7032EE		RKI	ncov	Human	B.1.1.7	20I (Alpha, V1)	2021-05-04	Europe	Germany	Nordrhein-Westfalen	Landkreis Leverkusen; Stadt	Leverkusen	51375	51.0331	7.052		20I (Alpha, V1)	B.1.1.7	false	false	false	false	false	false	false	false	false
6166ba5b81e18c1c41ced313	1027800006	IIMK	ncov	Human	B.1.1.7	20I (Alpha, V1)	2021-04-19	Europe	Germany	Thuringia	Landkreis Saale-Holzland-Kreis	Eisenberg	7607	50.9689	11.8964	75	20I (Alpha, V1)	B.1.1.7	false	false	false	false	false	false	false	false	false
IMS-10146-CVDP-E0D8D747-87F2-45BB-8DFB-484552230DE3		RKI	ncov	Human	B.1.1.7	20I (Alpha, V1)	2021-03-16	Europe	Germany	Baden-Württemberg	Landkreis Ulm; Stadt	Ulm	89073	48.4015	9.9927		20I (Alpha, V1)	B.1.1.7	false	false	false	false	false	false	false	false	false
IMS-10020-CVDP-41EFC370-305C-41C1-9DAF-5C613180756C		RKI	ncov	Human	B.1.1.7	20I (Alpha, V1)	2021-04-14	Europe	Germany	Nordrhein-Westfalen	Landkreis Leverkusen; Stadt	Leverkusen	51375	51.0331	7.052		20I (Alpha, V1)	B.1.1.7	false	false	false	false	false	false	false	false	false
IMS-10383-CVDP-3C6DA6AB-AFBF-4D3E-812F-91BAD5B46859		RKI	ncov	Human	B.1.1.7	20I (Alpha, V1)	2021-04-30	Europe	Germany	Bayern	Regensburg; Stadt	Regensburg	93053	48.9965	12.1202		20I (Alpha, V1)	B.1.1.7	false	false	false	false	false	false	false	false	false
IMS-10020-CVDP-F58CE497-FBC4-4AF1-A68A-2DB76A20D9B4		RKI	ncov	Human	B.1.1.7	20I (Alpha, V1)	2021-02-24	Europe	Germany	Rheinland-Pfalz	Landkreis Trier; kreisfreie Stadt	Trier	54290	49.7537	6.6393		20I (Alpha, V1)	B.1.1.7	false	false	false	false	false	false	false	false	false
IMS-10370-CVDP-42C95AD9-B099-42DD-B334-2248A54533B6		RKI	ncov	Human	B.1.1.7	20I (Alpha, V1)	2021-02-20	Europe	Germany	Brandenburg	Kreisfreie Stadt Potsdam	Potsdam	14467	52.403	13.0626		20I (Alpha, V1)	B.1.1.7	false	false	false	false	false	false	false	false	false
IMS-10186-CVDP-5D6E9D60-9026-4A9B-BA2C-1F47DC7F0103		RKI	ncov	Human	B.1.1.7	20I (Alpha, V1)	2021-04-05	Europe	Germany	Nordrhein-Westfalen	Landkreis Düsseldorf; Stadt	Düsseldorf	40210	51.2216	6.7897		20I (Alpha, V1)	B.1.1.7	false	false	false	false	false	false	false	false	false
IMS-10013-CVDP-9CF77C0B-0BEA-458F-B3E1-74C2CEEF988D		RKI	ncov	Human	B.1.1.7	20I (Alpha, V1)	2021-02-25	Europe	Germany	Bayern	Landkreis Augsburg; Stadt	Augsburg	86154	48.3932	10.8814		20I (Alpha, V1)	B.1.1.7	false	false	false	false	false	false	false	false	false
IMS-10013-CVDP-0AA87BC2-70B9-4292-ADA5-C0941F3C2C6F		RKI	ncov	Human	B.1.1.7	20I (Alpha, V1)	2021-04-28	Europe	Germany	Bayern	Landkreis Augsburg; Stadt	Augsburg	86154	48.3932	10.8814		20I (Alpha, V1)	Q.7	false	false	false	false	false	false	false	false	false
IMS-10020-CVDP-2DB45223-5FEE-4D92-BF66-45266F0DB5D5		RKI	ncov	Human	B.1.1.7	20I (Alpha, V1)	2021-03-27	Europe	Germany	Rheinland-Pfalz	Landkreis Trier; kreisfreie Stadt	Trier	54290	49.7537	6.6393		20I (Alpha, V1)	B.1.1.7	false	false	false	false	false	false	false	false	false
IMS-10116-CVDP-55977E86-0540-4BF0-A156-E5EB9C299BD1		RKI	ncov	Human	B.1.1.7	20I (Alpha, V1)	2021-02-22	Europe	Germany	Nordrhein-Westfalen	Landkreis Essen; Stadt	Essen	45326	51.4844	7.005		20I (Alpha, V1)	B.1.1.7	false	false	false	false	false	false	false	false	false
IMS-10116-CVDP-5D15DDA4-AE6A-4877-9294-277ADA64C5E3		RKI	ncov	Human	B.1.1.7	20I (Alpha, V1)	2021-02-23	Europe	Germany	Baden-Württemberg	Landkreis Ludwigsburg	Ludwigsburg	71636	48.8901	9.1746		20I (Alpha, V1)	B.1.1.7	false	false	false	false	false	false	false	false	false
IMS-10218-CVDP-83F1D6DD-D464-48AB-A022-C69AAA176E04		RKI	ncov	Human	B.1.1.7	20I (Alpha, V1)	2021-03-12	Europe	Germany	Sachsen-Anhalt	Landkreis Landeshauptstadt Magdeburg	Magdeburg	39104	52.1243	11.6322		20I (Alpha, V1)	B.1.1.7	false	false	false	false	false	false	false	false	false
6166ba5b81e18c1c41ced34f	1000425567	IIMK	ncov	Human	B.1.1.7	20I (Alpha, V1)	2021-04-20	Europe	Germany	Thuringia	Landkreis Erfurt; Stadt	Erfurt	99084	50.9775	11.0251	0	20I (Alpha, V1)	B.1.1.7	false	false	false	false	false	false	false	false	false
IMS-10209-CVDP-001FB450-BC05-4065-8004-04BDF04831C6		RKI	ncov	Human	B.1.1.7	20I (Alpha, V1)	2021-04-05	Europe	Germany	Baden-Württemberg	Landkreis Konstanz	Konstanz	78467	47.6744	9.1649		20I (Alpha, V1)	B.1.1.7	false	false	false	false	false	false	false	false	false
IMS-10116-CVDP-23237676-53BF-4F42-B134-B30CA70BF49E		RKI	ncov	Human	B.1.1.7	20I (Alpha, V1)	2021-04-22	Europe	Germany	Nordrhein-Westfalen	Landkreis Essen; Stadt	Essen	45326	51.4844	7.005		20I (Alpha, V1)	B.1.1.7	false	false	false	false	false	false	false	false	false
IMS-10117-CVDP-62B6AFCE-4600-403B-9FC2-26A6558E438F		RKI	ncov	Human	B.1.1.7	20I (Alpha, V1)	2021-03-30	Europe	Germany	Baden-Württemberg	Landkreis Rhein-Neckar-Kreis	Eppelheim	69214	49.4019	8.6364		20I (Alpha, V1)	B.1.1.7	false	false	false	false	false	false	false	false	false
IMS-10117-CVDP-6BFF40DD-86AA-4A17-997F-941B19F0A90D		RKI	ncov	Human	B.1.1.7	20I (Alpha, V1)	2021-03-30	Europe	Germany	Baden-Württemberg	Landkreis Karlsruhe	Ettlingen	76275	48.9409	8.4076		20I (Alpha, V1)	B.1.1.7	false	false	false	false	false	false	false	false	false
IMS-10087-CVDP-070F3A05-E14C-4B24-89A5-BB3ECD85F9A6		RKI	ncov	Human	B.1.1.7	20I (Alpha, V1)	2021-03-29	Europe	Germany	Nordrhein-Westfalen	Landkreis Köln; Stadt	Köln	50858	50.9243	6.8565		20I (Alpha, V1)	B.1.1.7	false	false	false	false	false	false	false	false	false
IMS-10150-CVDP-0493AB7B-2D79-45BC-BB55-E7FDFC8563ED		RKI	ncov	Human	B.1.1.7	20I (Alpha, V1)	2021-04-30	Europe	Germany	Nordrhein-Westfalen	Landkreis Leverkusen; Stadt	Leverkusen	51375	51.0331	7.052		20I (Alpha, V1)	B.1.1.7	false	false	false	false	false	false	false	false	false
IMS-10272-CVDP-16B14DE1-DD8D-4C8C-87FA-54DCEBE88929		RKI	ncov	Human	B.1.1.7	20I (Alpha, V1)	2021-03-31	Europe	Germany	Bayern	Landkreis München	Oberschleißheim	85764	48.25	11.5667		20I (Alpha, V1)	B.1.1.7	false	false	false	false	false	false	false	false	false
IMS-10122-CVDP-6BF6A6EE-D588-4F85-94EA-1B21E0919891		RKI	ncov	Human	B.1.1.7	20I (Alpha, V1)	2021-02-10	Europe	Germany	Baden-Württemberg	Landkreis Karlsruhe	Karlsruhe	76131	49.0078	8.4199		20I (Alpha, V1)	B.1.1.7	false	false	false	false	false	false	false	false	false
6166ba5c81e18c1c41cede5d	1091307273	IIMK	ncov	Human	B.1.1.7	20I (Alpha, V1)	2021-03-25	Europe	Germany	Thuringia	Landkreis Unstrut-Hainich-Kreis	Mühlhausen	99974	51.2088	10.459	260	20I (Alpha, V1)	B.1.1.7	false	false	false	false	false	false	false	false	false
IMS-10013-CVDP-1ACB4326-9DB9-4E40-8CE5-7ACE2925DC0C		RKI	ncov	Human	B.1.1.7	20I (Alpha, V1)	2021-03-19	Europe	Germany	Bremen	Kreisfreie Stadt Bremen	Bremen	28357	53.1178	8.8947		20I (Alpha, V1)	B.1.1.7	false	false	false	false	false	false	false	false	false
IMS-10087-CVDP-CFD71F62-B679-4364-97AB-3A625B242EAF		RKI	ncov	Human	B.1.1.7	20I (Alpha, V1)	2021-03-09	Europe	Germany	Nordrhein-Westfalen	Landkreis Köln; Stadt	Köln	50858	50.9243	6.8565		20I (Alpha, V1)	B.1.1.7	false	false	false	false	false	false	false	false	false
IMS-10020-CVDP-8665D2EE-A6AF-44B4-AFA6-9FDE390BA82A		RKI	ncov	Human	B.1.1.7	20I (Alpha, V1)	2021-03-11	Europe	Germany	Rheinland-Pfalz	Landkreis Trier; kreisfreie Stadt	Trier	54290	49.7537	6.6393		20I (Alpha, V1)	B.1.1.7	false	false	false	false	false	false	false	false	false
IMS-10115-CVDP-F945FCBB-FC18-4B48-AFE3-AFE7DB6071E5		RKI	ncov	Human	B.1.1.7	20I (Alpha, V1)	2021-02-26	Europe	Germany	Baden-Württemberg	Landkreis Rhein-Neckar-Kreis	Eppelheim	69214	49.4019	8.6364		20I (Alpha, V1)	B.1.1.7	false	false	false	false	false	false	false	false	false
IMS-10215-CVDP-E63813F6-FCC6-4101-9AD2-A90F41CF8E8F		RKI	ncov	Human	B.1.1.7	20I (Alpha, V1)	2021-04-06	Europe	Germany	Sachsen	Kreisfreie Stadt Leipzig	Leipzig	4103	51.3405	12.3827		20I (Alpha, V1)	B.1.1.7	false	false	false	false	true	false	false	false	false
IMS-10061-CVDP-5AD24BFE-477A-4BCC-86FA-B2370B22D512		RKI	ncov	Human	B.1.1.7	20I (Alpha, V1)	2021-04-02	Europe	Germany	Sachsen-Anhalt	Kreisfreie Stadt Halle	Halle	6112	51.4753	11.9973		20I (Alpha, V1)	B.1.1.7	false	false	false	false	false	false	false	false	false
IMS-10013-CVDP-6B09DDEF-C656-4A40-ADF1-E3997D946D3A		RKI	ncov	Human	B.1.1.7	20I (Alpha, V1)	2021-03-18	Europe	Germany	Sachsen	Landkreis Nordsachsen	Wermsdorf	4779	51.2833	12.95		20I (Alpha, V1)	B.1.1.7	false	false	false	false	false	false	false	false	false
IMS-10013-CVDP-C0C3E463-1871-4F44-8A3D-F25E3667B160		RKI	ncov	Human	B.1.1.7	20I (Alpha, V1)	2021-04-17	Europe	Germany	Bayern	Landkreis Augsburg; Stadt	Augsburg	86154	48.3932	10.8814		20I (Alpha, V1)	B.1.1.7	false	false	false	false	false	false	false	false	false
IMS-10020-CVDP-28528D22-E18E-4626-A661-628673FBF898		RKI	ncov	Human	B.1.1.7	20I (Alpha, V1)	2021-04-15	Europe	Germany	Rheinland-Pfalz	Landkreis Trier; kreisfreie Stadt	Trier	54290	49.7537	6.6393		20I (Alpha, V1)	B.1.1.7	false	false	false	false	false	false	false	false	false
IMS-10020-CVDP-1A9C68BF-5662-4CF3-B802-55AE391BA9D7		RKI	ncov	Human	B.1.1.7	20I (Alpha, V1)	2021-03-14	Europe	Germany	Baden-Württemberg	Landkreis Esslingen	Leinfelden-Echterdingen	70771	48.6941	9.1681		20I (Alpha, V1)	B.1.1.7	false	false	false	false	false	false	false	false	false
IMS-10013-CVDP-FBB42BFF-9510-4896-B4D7-F302EF3BC8EB		RKI	ncov	Human	B.1.1.7	20I (Alpha, V1)	2021-02-01	Europe	Germany	Niedersachsen	Landkreis Region Hannover	Hannover	30163	52.3943	9.7475		20I (Alpha, V1)	B.1.1.7	false	false	false	false	false	false	false	false	false
IMS-10186-CVDP-50DE8EBD-5A9B-49FC-AC3F-4019BD5BE1BF		RKI	ncov	Human	B.1.1.7	20I (Alpha, V1)	2021-04-02	Europe	Germany	Nordrhein-Westfalen	Landkreis Düsseldorf; Stadt	Düsseldorf	40210	51.2216	6.7897		20I (Alpha, V1)	B.1.1.7	false	false	false	false	false	false	false	false	false
IMS-10020-CVDP-C161B226-4F2E-40FC-AE52-C8D5C8A2D0A9		RKI	ncov	Human	B.1.1.7	20I (Alpha, V1)	2021-03-25	Europe	Germany	Baden-Württemberg	Landkreis Esslingen	Leinfelden-Echterdingen	70771	48.6941	9.1681		20I (Alpha, V1)	B.1.1.7	false	false	false	false	false	false	false	false	false
IMS-10013-CVDP-BB515C17-ACC9-41AD-9D21-241C7FB14545		RKI	ncov	Human	B.1.1.7	20I (Alpha, V1)	2021-03-31	Europe	Germany	Sachsen	Landkreis Nordsachsen	Wermsdorf	4779	51.2833	12.95		20I (Alpha, V1)	B.1.1.7	false	false	false	false	false	false	false	false	false
IMS-10061-CVDP-5F5EA71A-C74F-49BD-ADA4-5038A6AA8B19		RKI	ncov	Human	B.1.1.7	20I (Alpha, V1)	2021-03-28	Europe	Germany	Niedersachsen	Landkreis Göttingen	Göttingen	37077	51.5604	9.9319		20I (Alpha, V1)	B.1.1.7	false	false	false	false	false	false	false	false	false
6166ba5c81e18c1c41cedf50	1091310757	IIMK	ncov	Human	B.1.1.7	20I (Alpha, V1)	2021-03-28	Europe	Germany	Thuringia	Landkreis Ilm-Kreis	Arnstadt	99310	50.8343	10.9456	66	20I (Alpha, V1)	B.1.1.7	false	false	false	false	false	false	false	false	false
6166ba5c81e18c1c41cedf24	1050187490	IIMK	ncov	Human	B.1.1.7	20I (Alpha, V1)	2021-03-28	Europe	Germany	Thuringia	Landkreis Greiz	Zeulenroda-Triebes	7937	50.6489	11.9803	85	20I (Alpha, V1)	B.1.1.7	false	true	false	false	false	false	false	true	false
IMS-10013-CVDP-DD180CEA-A755-4F1D-8170-31CC2513A7A3		RKI	ncov	Human	B.1.1.7	20I (Alpha, V1)	2021-03-24	Europe	Germany	Berlin	Landkreis Berlin; Stadt	Berlin	14197	52.4734	13.3118		20I (Alpha, V1)	B.1.1.7	false	false	false	false	false	false	false	false	false
6166ba5b81e18c1c41cecec9	1028300953	IIMK	ncov	Human	B.1.1.7	20I (Alpha, V1)	2021-04-07	Europe	Germany	Thuringia	Landkreis Kyffhäuserkreis	Sondershausen	99706	51.3677	10.8675	1178	20I (Alpha, V1)	B.1.1.7	false	false	false	false	false	false	false	false	false
IMS-10117-CVDP-DD4718C9-2BDB-4DC1-B9B6-35300DA45632		RKI	ncov	Human	B.1.1.7	20I (Alpha, V1)	2021-03-22	Europe	Germany	Baden-Württemberg	Landkreis Karlsruhe	Ettlingen	76275	48.9409	8.4076		20I (Alpha, V1)	B.1.1.7	false	false	false	false	false	false	false	false	false
IMS-10020-CVDP-8AEA3DA3-4FF1-426F-AB8F-4EB10A9D5D55		RKI	ncov	Human	B.1.1.7	20I (Alpha, V1)	2021-02-16	Europe	Germany	Bayern	Landkreis Weiden i.d.OPf.	Weiden	92637	49.6768	12.1561		20I (Alpha, V1)	B.1.1.7	false	false	false	false	false	false	false	false	false
IMS-10116-CVDP-E1A06CDE-0819-4256-BCFD-9F5FD8D21892		RKI	ncov	Human	B.1.1.7	20I (Alpha, V1)	2021-04-15	Europe	Germany	Berlin	Landkreis Berlin; Stadt	Berlin	13407	52.5727	13.3512		20I (Alpha, V1)	B.1.1.7	false	false	false	false	false	false	false	false	false
IMS-10013-CVDP-2EC74DFD-9361-456C-8FA8-DBB90BF19E74		RKI	ncov	Human	B.1.1.7	20I (Alpha, V1)	2021-03-01	Europe	Germany	Sachsen	Landkreis Nordsachsen	Wermsdorf	4779	51.2833	12.95		20I (Alpha, V1)	B.1.1.7	false	false	false	false	false	false	false	false	false
IMS-10294-CVDP-7FC4E4FC-1FFF-4F6F-8D95-94EBEEA71582		RKI	ncov	Human	B.1.1.7	20I (Alpha, V1)	2021-02-18	Europe	Germany	Nordrhein-Westfalen	Landkreis Düsseldorf; Stadt	Düsseldorf	40477	51.2371	6.7795		20I (Alpha, V1)	B.1.1.7	false	false	false	false	false	false	false	false	false
IMS-10261-CVDP-20F545D7-DE68-48F5-96B8-9A95AE1EBC16		RKI	ncov	Human	B.1.1.7	20I (Alpha, V1)	2021-04-13	Europe	Germany	Nordrhein-Westfalen	Landkreis Lippe	Bad Salzuflen	32105	52.0808	8.7505		20I (Alpha, V1)	B.1.1.7	false	false	false	false	false	false	false	false	false
IMS-10338-CVDP-00159		RKI	ncov	Human	B.1.1.7	20I (Alpha, V1)	2021-02-05	Europe	Germany	Hessen	Landkreis Frankfurt am Main; Stadt	Frankfurt am Main	60327	50.1038	8.6522		20I (Alpha, V1)	B.1.1.7	false	false	false	false	false	false	false	false	false
IMS-10116-CVDP-BE84B6A5-0435-456D-AAF5-EB84045ECECB		RKI	ncov	Human	B.1.1.7	20I (Alpha, V1)	2021-02-24	Europe	Germany	Baden-Württemberg	Landkreis Heidelberg	Heidelberg	69126	49.3757	8.6911		20I (Alpha, V1)	B.1.1.7	false	false	false	false	false	false	false	false	false
IMS-10013-CVDP-A96D31AA-15A6-4634-A9B6-6B27C4F9BD59		RKI	ncov	Human	B.1.1.7	20I (Alpha, V1)	2021-03-07	Europe	Germany	Sachsen	Landkreis Nordsachsen	Wermsdorf	4779	51.2833	12.95		20I (Alpha, V1)	B.1.1.7	false	false	false	false	false	false	false	false	false
IMS-10013-CVDP-38AFB91B-EB96-4E6A-AAE6-37FFC950E53C		RKI	ncov	Human	B.1.1.7	20I (Alpha, V1)	2021-04-23	Europe	Germany	Sachsen	Landkreis Nordsachsen	Wermsdorf	4779	51.2833	12.95		20I (Alpha, V1)	B.1.1.7	false	false	false	false	false	false	false	false	false
IMS-10188-CVDP-97FAF8EA-EFB9-4D81-B7FB-DD1A85B64922		RKI	ncov	Human	B.1.1.7	20I (Alpha, V1)	2021-02-22	Europe	Germany	Baden-Württemberg	Landkreis Konstanz	Singen	78224	47.7593	8.8403		20I (Alpha, V1)	B.1.1.7	false	false	false	false	false	false	false	false	false
IMS-10116-CVDP-88839CF7-AF33-47E5-A0CA-567FB9C19C21		RKI	ncov	Human	B.1.1.7	20I (Alpha, V1)	2021-02-15	Europe	Germany	Berlin	Landkreis Berlin; Stadt	Berlin	13407	52.5727	13.3512		20I (Alpha, V1)	B.1.1.7	false	false	false	false	false	false	false	false	false
6166b85c81e18c1c41cec89e	IMS-10013-CVDP-fff24b4e-bb49-4398-9e18-31041555b8bc	IIMK	ncov	Human	B.1.1.7	20I (Alpha, V1)	2021-05-07	Europe	Germany	Thuringia	Landkreis Jena; Stadt	Jena	7743	50.9283	11.5853	286	20I (Alpha, V1)	B.1.1.7	false	false	false	false	false	false	false	false	false
6166ba5b81e18c1c41ced08e	1024625849	IIMK	ncov	Human	B.1.1.7	20I (Alpha, V1)	2021-04-12	Europe	Germany	Thuringia	Landkreis Gotha	Gotha	99867	50.9461	10.6962	788	20I (Alpha, V1)	B.1.1.7	false	false	false	false	false	false	false	false	false
IMS-10197-CVDP-00052		RKI	ncov	Human	B.1.1.7	20I (Alpha, V1)	2021-02-08	Europe	Germany	Sachsen-Anhalt	Landkreis Landeshauptstadt Magdeburg	Magdeburg	39124	52.1638	11.6333		20I (Alpha, V1)	B.1.1.7	false	false	false	false	false	false	false	false	false
IMS-10122-CVDP-55831F31-98CE-4CFF-B1FF-8C060C2BB153		RKI	ncov	Human	B.1.1.7	20I (Alpha, V1)	2021-03-30	Europe	Germany	Sachsen	Kreisfreie Stadt Dresden	Dresden	1239	51.0066	13.8089		20I (Alpha, V1)	B.1.1.7	false	false	false	false	false	false	false	false	false
IMS-10117-CVDP-C4286510-01F0-42C0-8152-8903643ACDC7		RKI	ncov	Human	B.1.1.7	20I (Alpha, V1)	2021-04-12	Europe	Germany	Baden-Württemberg	Landkreis Rhein-Neckar-Kreis	Eppelheim	69214	49.4019	8.6364		20I (Alpha, V1)	B.1.1.7	false	false	false	false	false	false	false	false	false
IMS-10116-CVDP-33AE5379-BEE0-4D80-9337-6453DE2523A3		RKI	ncov	Human	B.1.1.7	20I (Alpha, V1)	2021-02-23	Europe	Germany	Nordrhein-Westfalen	Landkreis Essen; Stadt	Essen	45326	51.4844	7.005		20I (Alpha, V1)	B.1.1.7	false	false	false	false	false	false	false	false	false
IMS-10375-CVDP-1233741E-C0A6-46CC-85C8-0A3431A83172		RKI	ncov	Human	B.1.1.7	20I (Alpha, V1)	2021-04-26	Europe	Germany	Baden-Württemberg	Landkreis Heidelberg	Heidelberg	69120	49.4169	8.6764		20I (Alpha, V1)	B.1.1.7	false	false	false	false	false	false	false	false	false
IMS-10294-CVDP-02062F6F-EDFB-4831-AA43-9B71AE9E9A49		RKI	ncov	Human	B.1.1.7	20I (Alpha, V1)	2021-04-28	Europe	Germany	Nordrhein-Westfalen	Landkreis Düsseldorf; Stadt	Düsseldorf	40210	51.2216	6.7897		20I (Alpha, V1)	B.1.1.7	false	false	false	false	false	false	false	false	false
IMS-10036-CVDP-260911E5-E854-4A0E-9D95-F0BDB963CD58		RKI	ncov	Human	B.1.1.7	20I (Alpha, V1)	2021-02-24	Europe	Germany	Mecklenburg-Vorpommern	Landkreis Vorpommern-Greifswald	Greifswald	17493	54.0902	13.4464		20I (Alpha, V1)	B.1.1.7	false	false	false	false	false	false	false	false	false
IMS-10117-CVDP-95A7340F-EF2B-49F8-BE52-F42C2702950D		RKI	ncov	Human	B.1.1.7	20I (Alpha, V1)	2021-03-20	Europe	Germany	Baden-Württemberg	Landkreis Rhein-Neckar-Kreis	Eppelheim	69214	49.4019	8.6364		20I (Alpha, V1)	B.1.1.7	false	false	false	false	false	false	false	true	false
IMS-10020-CVDP-8DFDFDC0-C0B3-46FD-8244-3A89252EFE08		RKI	ncov	Human	B.1.1.7	20I (Alpha, V1)	2021-04-26	Europe	Germany	Bayern	Kreisfreie Stadt München	München	80335	48.1427	11.5552		20I (Alpha, V1)	B.1.1.7	false	false	false	false	false	false	false	false	false
IMS-10020-CVDP-160133DB-171D-491A-8F23-9DBE35034389		RKI	ncov	Human	B.1.1.7	20I (Alpha, V1)	2021-02-19	Europe	Germany	Bayern	Landkreis Weiden i.d.OPf.	Weiden	92637	49.6768	12.1561		20I (Alpha, V1)	B.1.1.7	false	false	false	false	false	false	false	false	false
IMS-10215-CVDP-EA6296BC-DEE9-4AA2-889D-1FF7F84A7736		RKI	ncov	Human	B.1.1.7	20I (Alpha, V1)	2021-03-28	Europe	Germany	Sachsen	Kreisfreie Stadt Leipzig	Leipzig	4103	51.3405	12.3827		20I (Alpha, V1)	B.1.1.7	false	false	false	false	false	false	false	false	false
IMS-10116-CVDP-34EC016D-2211-4B52-B0FF-6DC74ECA0788		RKI	ncov	Human	B.1.1.7	20I (Alpha, V1)	2021-04-04	Europe	Germany	Berlin	Landkreis Berlin; Stadt	Berlin	13407	52.5727	13.3512		20I (Alpha, V1)	B.1.1.7	false	false	false	false	false	false	false	false	false
IMS-10150-CVDP-D4345FFD-7D64-466C-B982-E3467C30A102		RKI	ncov	Human	B.1.1.7	20I (Alpha, V1)	2021-04-21	Europe	Germany	Rheinland-Pfalz	Landkreis Trier; kreisfreie Stadt	Trier	54290	49.7537	6.6393		20I (Alpha, V1)	B.1.1.7	false	false	false	false	false	false	false	false	false
IMS-10020-CVDP-6288AE3F-2E93-4221-BA0F-DE54D889D180		RKI	ncov	Human	B.1.1.7	20I (Alpha, V1)	2021-04-11	Europe	Germany	Baden-Württemberg	Landkreis Esslingen	Leinfelden-Echterdingen	70771	48.6941	9.1681		20I (Alpha, V1)	B.1.1.7	false	false	false	false	false	false	false	false	false
6166ba5b81e18c1c41ceca24	1024587704	IIMK	ncov	Human	B.1.1.7	20I (Alpha, V1)	2021-05-04	Europe	Germany	Thuringia	Landkreis Eichsfeld	Arenshausen	37318	51.3624	10.0721	0	20I (Alpha, V1)	B.1.1.7	false	false	false	false	false	false	false	false	false
IMS-10004-CVDP-751050BD-9026-44DD-A3FC-573441A391D6		RKI	ncov	Human	B.1.1.7	20I (Alpha, V1)	2021-04-12	Europe	Germany	Schleswig-Holstein	Kreis Herzogtum Lauenburg	Kreis Herzogtum Lauenburg	21502	53.5966	10.5762		20I (Alpha, V1)	B.1.1.7	false	false	false	false	false	false	false	false	false
IMS-10165-CVDP-663C9956-42B5-42D5-A740-D0D1CB6ACEAB		RKI	ncov	Human	B.1.1.7	20I (Alpha, V1)	2021-03-29	Europe	Germany	Sachsen	Landkreis Bautzen	Ottendorf-Okrilla	1458	51.1833	13.8333		20I (Alpha, V1)	B.1.1.7	false	false	false	false	false	false	false	false	false
IMS-10122-CVDP-6B1B67F3-8106-457B-BC7D-45C2B7C4428A		RKI	ncov	Human	B.1.1.7	20I (Alpha, V1)	2021-02-27	Europe	Germany	Baden-Württemberg	Landkreis Karlsruhe	Karlsruhe	76131	49.0078	8.4199		20I (Alpha, V1)	B.1.1.7	false	false	false	false	false	false	false	false	false
IMS-10061-CVDP-BC390E15-359A-4754-A25C-371EB768DE13		RKI	ncov	Human	B.1.1.7	20I (Alpha, V1)	2021-04-07	Europe	Germany	Nordrhein-Westfalen	Landkreis Essen; Stadt	Essen	45127	51.4535	7.0102		20I (Alpha, V1)	B.1.1.7	false	false	false	false	false	false	false	false	false
IMS-10020-CVDP-29A1148C-3DE4-495E-9B57-593BE225B8EF		RKI	ncov	Human	B.1.1.7	20I (Alpha, V1)	2021-03-02	Europe	Germany	Berlin	Landkreis Berlin; Stadt	Berlin	10829	52.4761	13.3607		20I (Alpha, V1)	B.1.1.7	false	false	false	false	false	false	false	false	false
IMS-10020-CVDP-EB3B6BB6-DAC5-48BD-A6F1-771092320A96		RKI	ncov	Human	B.1.1.7	20I (Alpha, V1)	2021-04-16	Europe	Germany	Nordrhein-Westfalen	Landkreis Leverkusen; Stadt	Leverkusen	51375	51.0331	7.052		20I (Alpha, V1)	Q.7	false	false	false	false	false	false	false	false	false
6166ba5b81e18c1c41cecd8c	1091315893	IIMK	ncov	Human	B.1.1.7	20I (Alpha, V1)	2021-04-01	Europe	Germany	Thuringia	Landkreis Unstrut-Hainich-Kreis	Körner	99998	51.1917	10.525	466	20I (Alpha, V1)	B.1.1.7	false	false	false	false	false	false	false	false	false
IMS-10257-CVDP-55E76378-0002-4749-9336-36E92F8B5DCE		RKI	ncov	Human	B.1.1.7	20I (Alpha, V1)	2021-04-14	Europe	Germany	Hessen	Landkreis Frankfurt am Main; Stadt	Frankfurt am Main	65926	50.096	8.7111		20I (Alpha, V1)	B.1.1.7	false	false	false	false	false	false	false	false	false
IMS-10013-CVDP-F6F0DCE3-15A9-4C54-8BF3-411BCA0C56D5		RKI	ncov	Human	B.1.1.7	20I (Alpha, V1)	2021-03-01	Europe	Germany	Sachsen	Landkreis Nordsachsen	Wermsdorf	4779	51.2833	12.95		20I (Alpha, V1)	B.1.1.7	false	false	false	false	false	false	false	false	false
6166ba5c81e18c1c41cede27	1025082451	IIMK	ncov	Human	B.1.1.7	20I (Alpha, V1)	2021-03-25	Europe	Germany	Thuringia	Landkreis Saale-Holzland-Kreis	Crossen	7613	50.9646	11.984	121	20I (Alpha, V1)	B.1.1.7	false	false	false	false	false	false	false	false	false
IMS-10020-CVDP-9FA0FCFB-FE63-4ACE-B2BB-DBDC3DBFAD57		RKI	ncov	Human	B.1.1.7	20I (Alpha, V1)	2021-03-23	Europe	Germany	Rheinland-Pfalz	Landkreis Trier; kreisfreie Stadt	Trier	54290	49.7537	6.6393		20I (Alpha, V1)	B.1.1.7	false	false	false	false	false	false	false	false	false
IMS-10020-CVDP-DB5EBF89-0E56-4953-9266-F7E04E0CE142		RKI	ncov	Human	B.1.1.7	20I (Alpha, V1)	2021-03-18	Europe	Germany	Baden-Württemberg	Landkreis Esslingen	Leinfelden-Echterdingen	70771	48.6941	9.1681		20I (Alpha, V1)	B.1.1.7	false	false	false	false	false	false	false	false	false
IMS-10020-CVDP-57F9B578-08B8-4723-80B2-18FBADC49790		RKI	ncov	Human	B.1.1.7	20I (Alpha, V1)	2021-03-17	Europe	Germany	Rheinland-Pfalz	Landkreis Trier; kreisfreie Stadt	Trier	54290	49.7537	6.6393		20I (Alpha, V1)	B.1.1.7	false	false	false	false	false	false	false	false	false
IMS-10218-CVDP-BC3FA228-CE14-4D50-BAB8-D2B0F9E54DF0		RKI	ncov	Human	B.1.1.7	20I (Alpha, V1)	2021-03-05	Europe	Germany	Sachsen-Anhalt	Landkreis Landeshauptstadt Magdeburg	Magdeburg	39104	52.1243	11.6322		20I (Alpha, V1)	B.1.1.7	false	false	false	false	false	false	false	false	false
IMS-10150-CVDP-CF010A43-DCDF-4634-BEFD-70457FEED0C2		RKI	ncov	Human	B.1.1.7	20I (Alpha, V1)	2021-05-04	Europe	Germany	Nordrhein-Westfalen	Landkreis Leverkusen; Stadt	Leverkusen	51375	51.0331	7.052		20I (Alpha, V1)	B.1.1.7	false	false	false	false	false	false	false	false	false
6166ba5c81e18c1c41ced78f	5002417150	IIMK	ncov	Human	B.1.1.7	20I (Alpha, V1)	2021-03-01	Europe	Germany	Thuringia	Landkreis Gotha	Waltershausen	99880	50.8998	10.5563	62	20I (Alpha, V1)	B.1.1.7	false	false	false	false	false	false	false	false	false
IMS-10117-CVDP-36375677-CA50-47D5-B1BE-3E285EC52E17		RKI	ncov	Human	B.1.1.7	20I (Alpha, V1)	2021-03-08	Europe	Germany	Baden-Württemberg	Landkreis Karlsruhe	Ettlingen	76275	48.9409	8.4076		20I (Alpha, V1)	B.1.1.7	false	false	false	false	false	false	false	false	false
IMS-10219-CVDP-14337D71-5EEB-42C5-BC04-BB3A122E203D		RKI	ncov	Human	B.1.1.7	20I (Alpha, V1)	2021-04-01	Europe	Germany	Nordrhein-Westfalen	Landkreis Münster; Stadt	Münster	48143	51.9597	7.6314		20I (Alpha, V1)	B.1.1.7	false	false	false	false	false	false	false	true	false
IMS-10087-CVDP-1A8567A0-E88B-4B97-B0E5-19A767D14071		RKI	ncov	Human	B.1.1.7	20I (Alpha, V1)	2021-04-01	Europe	Germany	Nordrhein-Westfalen	Landkreis Köln; Stadt	Köln	50858	50.9243	6.8565		20I (Alpha, V1)	B.1.1.7	false	false	false	false	false	false	false	false	false
6166ba5b81e18c1c41cecb76	1091349981	IIMK	ncov	Human	B.1.1.7	20I (Alpha, V1)	2021-05-08	Europe	Germany	Thuringia	Landkreis Unstrut-Hainich-Kreis	Körner	99998	51.1917	10.525	277	20I (Alpha, V1)	B.1.1.7	false	false	false	false	false	false	false	false	false
IMS-10020-CVDP-3BC81217-FDBD-49E5-9A2E-735B63CE2A1E		RKI	ncov	Human	B.1.1.7	20I (Alpha, V1)	2021-02-16	Europe	Germany	Bayern	Landkreis Weiden i.d.OPf.	Weiden	92637	49.6768	12.1561		20I (Alpha, V1)	B.1.1.7	false	false	false	false	false	false	false	false	false
IMS-10117-CVDP-DD664495-E28C-497C-B554-8BDC9A85A929		RKI	ncov	Human	B.1.1.7	20I (Alpha, V1)	2021-03-17	Europe	Germany	Nordrhein-Westfalen	Landkreis Leverkusen; Stadt	Leverkusen	51375	51.0331	7.052		20I (Alpha, V1)	B.1.1.7	false	false	false	false	false	false	false	false	false
IMS-10013-CVDP-F472E53F-94EF-440E-B07E-05816A5E7AA5		RKI	ncov	Human	B.1.1.7	20I (Alpha, V1)	2021-02-18	Europe	Germany	Sachsen	Landkreis Nordsachsen	Wermsdorf	4779	51.2833	12.95		20I (Alpha, V1)	B.1.1.7	false	false	false	false	false	false	false	false	false
IMS-10375-CVDP-63C202C0-1734-4CDD-9F61-97F0C68D2721		RKI	ncov	Human	B.1.1.7	20I (Alpha, V1)	2021-03-14	Europe	Germany	Baden-Württemberg	Landkreis Heidelberg	Heidelberg	69120	49.4169	8.6764		20I (Alpha, V1)	Q.7	false	false	false	false	false	false	false	false	false
IMS-10594-CVDP-4639E57D-C498-42D0-9E71-7F90F50F5E9A		RKI	ncov	Human	B.1.1.7	20I (Alpha, V1)	2021-04-15	Europe	Germany	Nordrhein-Westfalen	Landkreis Münster; Stadt	Münster	48153	51.9268	7.6313		20I (Alpha, V1)	B.1.1.7	false	false	false	false	false	false	false	false	false
IMS-10013-CVDP-34A2B7EE-8782-4A69-A867-FC4A1958E307		RKI	ncov	Human	B.1.1.7	20I (Alpha, V1)	2021-04-01	Europe	Germany	Hamburg	Landkreis Hamburg; Freie und Hansestadt	Hamburg	22453	53.5722	10.0031		20I (Alpha, V1)	B.1.1.7	false	false	false	false	false	false	false	false	false
IMS-10004-CVDP-672FBC31-CBC8-4DCA-B29C-1BC9E4254876		RKI	ncov	Human	B.1.1.7	20I (Alpha, V1)	2021-04-19	Europe	Germany	Schleswig-Holstein	Kreis Herzogtum Lauenburg	Kreis Herzogtum Lauenburg	21502	53.5966	10.5762		20I (Alpha, V1)	B.1.1.7	false	false	false	false	false	false	false	false	false
IMS-10061-CVDP-C42F9923-AEA8-48D9-9092-F49E025B6DBF		RKI	ncov	Human	B.1.1.7	20I (Alpha, V1)	2021-04-04	Europe	Germany	Sachsen-Anhalt	Kreisfreie Stadt Halle	Halle	6112	51.4753	11.9973		20I (Alpha, V1)	B.1.1.7	false	false	false	false	false	false	false	false	false
IMS-10020-CVDP-1D9F3856-E26C-494C-9029-D06A43D4E893		RKI	ncov	Human	B.1.1.7	20I (Alpha, V1)	2021-03-12	Europe	Germany	Baden-Württemberg	Landkreis Esslingen	Leinfelden-Echterdingen	70771	48.6941	9.1681		20I (Alpha, V1)	B.1.1.7	false	false	false	false	false	false	false	false	false
IMS-10020-CVDP-5EE82F2A-A500-43C7-A9EA-B85FFA664BB2		RKI	ncov	Human	B.1.1.7	20I (Alpha, V1)	2021-02-09	Europe	Germany	Bayern	Landkreis Weiden i.d.OPf.	Weiden	92637	49.6768	12.1561		20I (Alpha, V1)	B.1.1.7	false	false	false	false	false	false	false	false	false
IMS-10209-CVDP-DB04E932-53D4-4CBC-BB8E-FB52A7F834D0		RKI	ncov	Human	B.1.1.7	20I (Alpha, V1)	2021-04-12	Europe	Germany	Baden-Württemberg	Landkreis Konstanz	Konstanz	78467	47.6744	9.1649		20I (Alpha, V1)	B.1.1.7	false	false	false	false	false	false	false	false	false
IMS-10061-CVDP-7F45859F-FFA4-4EA2-B155-5A74223F0E13		RKI	ncov	Human	B.1.1.7	20I (Alpha, V1)	2021-02-17	Europe	Germany	Niedersachsen	Landkreis Region Hannover	Hannover	30159	52.3736	9.7371		20I (Alpha, V1)	B.1.1.7	false	false	false	false	false	false	false	false	false
IMS-10020-CVDP-95FE37ED-B6C3-49BA-B4CE-50064E2A9F8E		RKI	ncov	Human	B.1.1.7	20I (Alpha, V1)	2021-03-21	Europe	Germany	Baden-Württemberg	Landkreis Esslingen	Leinfelden-Echterdingen	70771	48.6941	9.1681		20I (Alpha, V1)	B.1.1.7	false	false	false	false	false	false	false	false	false
IMS-10020-CVDP-71E48ECC-0602-4835-BA73-793F652CC5AD		RKI	ncov	Human	B.1.1.7	20I (Alpha, V1)	2021-03-29	Europe	Germany	Baden-Württemberg	Landkreis Esslingen	Leinfelden-Echterdingen	70771	48.6941	9.1681		20I (Alpha, V1)	B.1.1.7	false	false	false	false	false	false	false	false	false
IMS-10117-CVDP-8BAF6FA2-6B8D-4DDC-88E9-72B56E07F071		RKI	ncov	Human	B.1.1.7	20I (Alpha, V1)	2021-03-12	Europe	Germany	Rheinland-Pfalz	Landkreis Neustadt an der Weinstraße; kreisfreie Stadt	Neustadt an der Weinstraße	67433	49.3465	8.1491		20I (Alpha, V1)	B.1.1.7	false	false	false	false	false	false	false	false	false
IMS-10013-CVDP-2515C453-DEAE-4381-A1DF-3D91519A3840		RKI	ncov	Human	B.1.1.7	20I (Alpha, V1)	2021-05-03	Europe	Germany	Nordrhein-Westfalen	Landkreis Bochum; Stadt	Bochum	44799	51.4509	7.2388		20I (Alpha, V1)	B.1.1.7	false	false	false	false	false	false	false	false	false
IMS-10206-CVDP-2712A553-7B44-4039-B9E8-7613C8D2A45E		RKI	ncov	Human	B.1.1.7	20I (Alpha, V1)	2021-02-24	Europe	Germany	Niedersachsen	Landkreis Region Hannover	Hannover	30449	52.3685	9.7082		20I (Alpha, V1)	B.1.1.7	false	false	false	false	false	false	false	false	false
IMS-10004-CVDP-75027894-4548-415A-BE0C-88DF6BD0C980		RKI	ncov	Human	B.1.1.7	20I (Alpha, V1)	2021-02-10	Europe	Germany	Schleswig-Holstein	Kreis Herzogtum Lauenburg	Kreis Herzogtum Lauenburg	21502	53.5966	10.5762		20I (Alpha, V1)	B.1.1.7	false	false	false	false	false	false	false	false	false
6166ba5c81e18c1c41cedb71	1091299842	IIMK	ncov	Human	B.1.1.7	20I (Alpha, V1)	2021-03-18	Europe	Germany	Thuringia	Landkreis Nordhausen	Ellrich	99755	51.5872	10.6655	83	20I (Alpha, V1)	B.1.1.7	false	false	false	false	false	false	false	false	false
IMS-10013-CVDP-00622		RKI	ncov	Human	B.1.1.7	20I (Alpha, V1)	2021-01-19	Europe	Germany	Sachsen	Landkreis Nordsachsen	Wermsdorf	4779	51.2833	12.95		20I (Alpha, V1)	B.1.1.7	false	false	false	false	false	false	false	false	false
IMS-10020-CVDP-E8441E89-DBD0-4786-93F5-0AEAA393D2FD		RKI	ncov	Human	B.1.1.7	20I (Alpha, V1)	2021-03-29	Europe	Germany	Baden-Württemberg	Landkreis Esslingen	Leinfelden-Echterdingen	70771	48.6941	9.1681		20I (Alpha, V1)	B.1.1.7	false	false	false	false	false	false	false	false	false
IMS-10020-CVDP-78B7980F-8A10-4D44-8BA1-3D35F8C3684A		RKI	ncov	Human	B.1.1.7	20I (Alpha, V1)	2021-02-22	Europe	Germany	Baden-Württemberg	Landkreis Karlsruhe	Ettlingen	76275	48.9409	8.4076		20I (Alpha, V1)	Q.7	false	false	false	false	false	false	false	false	false
IMS-10338-CVDP-9F16AC00-E3E5-4E90-8848-8B10C1D307AC		RKI	ncov	Human	B.1.1.7	20I (Alpha, V1)	2021-03-24	Europe	Germany	Hessen	Landkreis Darmstadt; Wissenschaftsstadt	Darmstadt	64283	49.8719	8.6484		20I (Alpha, V1)	B.1.1.7	false	false	false	false	false	false	false	true	false
IMS-10013-CVDP-39D9A822-042A-4030-A081-E725BE294691		RKI	ncov	Human	B.1.1.7	20I (Alpha, V1)	2021-03-26	Europe	Germany	Hamburg	Landkreis Hamburg; Freie und Hansestadt	Hamburg	21079	53.5722	10.0031		20I (Alpha, V1)	B.1.1.7	false	false	false	false	false	false	false	false	false
IMS-10116-CVDP-64D4E3CA-F361-4541-9991-E0EF3CAC573D		RKI	ncov	Human	B.1.1.7	20I (Alpha, V1)	2021-05-06	Europe	Germany	Sachsen	Kreisfreie Stadt Dresden	Dresden	1067	51.0628	13.7297		20I (Alpha, V1)	B.1.1.7	false	false	false	false	false	false	false	false	false
6166ba5b81e18c1c41ced245	1028313054	IIMK	ncov	Human	B.1.1.7	20I (Alpha, V1)	2021-04-17	Europe	Germany	Thuringia	Landkreis Ilm-Kreis	Arnstadt	99310	50.8343	10.9456	1	20I (Alpha, V1)	B.1.1.7	false	false	false	false	false	false	false	false	false
IMS-10020-CVDP-099EBFFC-6F8C-4515-9871-66177EE496E8		RKI	ncov	Human	B.1.1.7	20I (Alpha, V1)	2021-04-20	Europe	Germany	Nordrhein-Westfalen	Landkreis Leverkusen; Stadt	Leverkusen	51375	51.0331	7.052		20I (Alpha, V1)	B.1.1.7	false	false	false	false	false	false	false	false	false
IMS-10020-CVDP-4AFAC9E4-CAA4-4D54-9629-AE72B652A5F0		RKI	ncov	Human	B.1.1.7	20I (Alpha, V1)	2021-03-26	Europe	Germany	Bayern	Landkreis Weiden i.d.OPf.	Weiden	92637	49.6768	12.1561		20I (Alpha, V1)	B.1.1.7	false	false	false	false	false	false	false	false	false
IMS-10338-CVDP-0C86992A-0437-40EF-91FC-AC88EA45FFF3		RKI	ncov	Human	B.1.1.7	20I (Alpha, V1)	2021-04-02	Europe	Germany	Nordrhein-Westfalen	Landkreis Bonn; Stadt	Bonn	53127	50.7112	7.0668		20I (Alpha, V1)	B.1.1.7	false	false	false	false	false	false	false	false	false
IMS-10116-CVDP-6947E5EE-9B7F-48CD-83F5-560F3B13CFA0		RKI	ncov	Human	B.1.1.7	20I (Alpha, V1)	2021-05-07	Europe	Germany	Nordrhein-Westfalen	Landkreis Mönchengladbach; Stadt	Mönchengladbach	41169	51.2	6.4333		20I (Alpha, V1)	B.1.1.7	false	false	false	false	false	false	false	false	false
IMS-10020-CVDP-6C0CE49C-4EC5-4AAE-8E3C-C2B8D8AE8FE6		RKI	ncov	Human	B.1.1.7	20I (Alpha, V1)	2021-04-02	Europe	Germany	Rheinland-Pfalz	Landkreis Trier; kreisfreie Stadt	Trier	54290	49.7537	6.6393		20I (Alpha, V1)	B.1.1.7	false	false	false	false	false	false	false	false	false
IMS-10020-CVDP-B7C3E0C1-496D-4A79-8080-E3FC55E11A74		RKI	ncov	Human	B.1.1.7	20I (Alpha, V1)	2021-02-23	Europe	Germany	Sachsen	Landkreis Leipzig	Rötha	4571	51.1978	12.4145		20I (Alpha, V1)	B.1.1.7	false	false	false	false	false	false	false	false	false
6166ba5b81e18c1c41ced076	1091324832	IIMK	ncov	Human	B.1.1.7	20I (Alpha, V1)	2021-04-12	Europe	Germany	Thuringia	Landkreis Jena; Stadt	Jena	7743	50.9283	11.5853	0	20I (Alpha, V1)	B.1.1.7	false	false	false	false	false	false	false	false	true
IMS-10036-CVDP-189333A0-EC60-42EC-BE6A-152247290CE1		RKI	ncov	Human	B.1.1.7	20I (Alpha, V1)	2021-02-11	Europe	Germany	Berlin	Landkreis Berlin; Stadt	Berlin	12247	52.4395	13.3462		20I (Alpha, V1)	B.1.1.7	false	false	false	false	false	false	false	false	false
IMS-10215-CVDP-B5BB1B9E-D82A-4D95-935D-B2023C3FEAFB		RKI	ncov	Human	B.1.1.7	20I (Alpha, V1)	2021-01-28	Europe	Germany	Sachsen	Kreisfreie Stadt Leipzig	Leipzig	4103	51.3405	12.3827		20I (Alpha, V1)	B.1.1.7	false	false	false	false	false	false	false	false	false
IMS-10203-CVDP-25308803-6D77-4B7E-8667-1453154B2EA8		RKI	ncov	Human	B.1.1.7	20I (Alpha, V1)	2021-03-29	Europe	Germany	Hamburg	Landkreis Hamburg; Freie und Hansestadt	Hamburg	20095	53.5722	10.0031		20I (Alpha, V1)	Q.7	false	false	false	false	false	false	false	false	false
IMS-10375-CVDP-8A31D914-659F-4FEC-9014-69255E1C1100		RKI	ncov	Human	B.1.1.7	20I (Alpha, V1)	2021-03-29	Europe	Germany	Baden-Württemberg	Landkreis Mannheim	Mannheim	68167	49.4996	8.4939		20I (Alpha, V1)	B.1.1.7	false	false	false	false	false	false	false	false	false
IMS-10023-CVDP-3E5BDC99-2C26-4090-9804-C04F75ADCB8B		RKI	ncov	Human	B.1.1.7	20I (Alpha, V1)	2021-02-23	Europe	Germany	Sachsen	Landkreis Erzgebirgskreis	Neukirchen/Erzgebirge	9221	50.7835	12.87		20I (Alpha, V1)	B.1.1.7	false	false	false	false	false	false	false	false	false
IMS-10116-CVDP-0B8F88C9-7A25-4B28-BE2E-3ADB7AEA824D		RKI	ncov	Human	B.1.1.7	20I (Alpha, V1)	2021-03-31	Europe	Germany	Baden-Württemberg	Landkreis Heidelberg	Heidelberg	69126	49.3757	8.6911		20I (Alpha, V1)	B.1.1.7	false	false	false	false	false	false	false	false	false
IMS-10272-CVDP-91586050-CD2B-4AE2-862B-167E45496A7B		RKI	ncov	Human	B.1.1.7	20I (Alpha, V1)	2021-01-27	Europe	Germany	Bayern	Landkreis München	Oberschleißheim	85764	48.25	11.5667		20I (Alpha, V1)	B.1.1.7	false	false	false	false	false	false	false	false	false
IMS-10272-CVDP-2CC28DF2-72A4-4F6D-AF6B-0561A00F2053		RKI	ncov	Human	B.1.1.7	20I (Alpha, V1)	2021-01-29	Europe	Germany	Bayern	Landkreis München	Oberschleißheim	85764	48.25	11.5667		20I (Alpha, V1)	B.1.1.7	false	false	false	false	false	false	false	false	false
6166ba5c81e18c1c41cedc3b	5002194444	IIMK	ncov	Human	B.1.1.7	20I (Alpha, V1)	2021-03-19	Europe	Germany	Thuringia	Landkreis Gera	Gera	7545	50.8753	12.0788	65	20I (Alpha, V1)	B.1.1.7	false	false	false	false	false	false	false	false	false
IMS-10020-CVDP-92049AE2-09F7-4740-98E5-F6E95823A514		RKI	ncov	Human	B.1.1.7	20I (Alpha, V1)	2021-04-12	Europe	Germany	Baden-Württemberg	Landkreis Esslingen	Leinfelden-Echterdingen	70771	48.6941	9.1681		20I (Alpha, V1)	B.1.1.7	false	false	false	false	false	false	false	false	false
IMS-10020-CVDP-475DC10E-A287-4779-8291-89DA2FCCDB6D		RKI	ncov	Human	B.1.1.7	20I (Alpha, V1)	2021-02-08	Europe	Germany	Bayern	Landkreis Weiden i.d.OPf.	Weiden	92637	49.6768	12.1561		20I (Alpha, V1)	B.1.1.7	false	false	false	false	false	false	false	false	false
6166ba5b81e18c1c41ced115	1024625999	IIMK	ncov	Human	B.1.1.7	20I (Alpha, V1)	2021-04-16	Europe	Germany	Thuringia	Landkreis Gotha	Ohrdruf	99885	50.8288	10.7341	0	20I (Alpha, V1)	B.1.1.7	false	false	false	false	false	false	false	false	false
IMS-10036-CVDP-A930676D-D7DE-46D0-A579-7E2E0F101603		RKI	ncov	Human	B.1.1.7	20I (Alpha, V1)	2021-03-31	Europe	Germany	Bayern	Landkreis München	Planegg	82152	48.1067	11.4248		20I (Alpha, V1)	B.1.1.7	false	false	false	false	false	false	false	false	false
IMS-10020-CVDP-971F6D4F-7814-4E70-9A38-4FE1CA3562CA		RKI	ncov	Human	B.1.1.7	20I (Alpha, V1)	2021-03-29	Europe	Germany	Berlin	Landkreis Berlin; Stadt	Berlin	10829	52.4761	13.3607		20I (Alpha, V1)	B.1.1.7	false	false	false	false	false	false	false	false	false
IMS-10173-CVDP-5E6C56E9-8175-49D0-B0AB-7AE06F1FE612		RKI	ncov	Human	B.1.1.7	20I (Alpha, V1)	2021-03-06	Europe	Germany	Nordrhein-Westfalen	Landkreis Minden-Lübbecke	Bad Oeynhausen	32545	52.1917	8.8093		20I (Alpha, V1)	B.1.1.7	false	false	false	false	false	false	false	false	false
IMS-10013-CVDP-E33BA67C-A8EE-4750-AA58-C218445F3782		RKI	ncov	Human	B.1.1.7	20I (Alpha, V1)	2021-02-18	Europe	Germany	Bremen	Kreisfreie Stadt Bremen	Bremen	28357	53.1178	8.8947		20I (Alpha, V1)	B.1.1.7	false	false	false	false	false	false	false	false	false
IMS-10150-CVDP-39FA123D-D8AD-493F-840B-FC931DDEBDAF		RKI	ncov	Human	B.1.1.7	20I (Alpha, V1)	2021-05-07	Europe	Germany	Nordrhein-Westfalen	Landkreis Leverkusen; Stadt	Leverkusen	51375	51.0331	7.052		20I (Alpha, V1)	B.1.1.7	false	false	false	false	false	false	false	false	false
IMS-10225-CVDP-2D27153B-2E31-4999-B29B-F6E43CD9CBEC		RKI	ncov	Human	B.1.1.7	20I (Alpha, V1)	2021-03-25	Europe	Germany	Baden-Württemberg	Heilbronn; Stadt	Heilbronn	74072	49.1423	9.2234		20I (Alpha, V1)	B.1.1.7	false	false	false	false	false	false	false	false	false
IMS-10116-CVDP-C42F22E6-7F8B-4F31-B6E2-D296F61311B1		RKI	ncov	Human	B.1.1.7	20I (Alpha, V1)	2021-03-08	Europe	Germany	Baden-Württemberg	Landkreis Heidelberg	Heidelberg	69126	49.3757	8.6911		20I (Alpha, V1)	B.1.1.7	false	false	false	false	false	false	false	false	false
60c8895b7685f53cf4e3a932	AN11564	IIMK	ncov	Human	B.1.1.7	20I (Alpha, V1)	2021-06-05	Europe	Germany	Thuringia	Landkreis Unstrut-Hainich-Kreis	Mühlhausen	99974	51.2088	10.459	189	20I (Alpha, V1)	B.1.1.7	false	false	false	false	false	false	false	false	false
6166ba5b81e18c1c41cecb30	1024580086	IIMK	ncov	Human	B.1.1.7	20I (Alpha, V1)	2021-05-07	Europe	Germany	Thuringia	Landkreis Eichsfeld	Küllstedt	37359	51.2758	10.2804	0	20I (Alpha, V1)	B.1.1.7	false	false	false	false	false	false	false	false	false
IMS-10150-CVDP-8B13225E-2654-43C9-BBF8-CA884C374890		RKI	ncov	Human	B.1.1.7	20I (Alpha, V1)	2021-04-30	Europe	Germany	Nordrhein-Westfalen	Landkreis Leverkusen; Stadt	Leverkusen	51375	51.0331	7.052		20I (Alpha, V1)	B.1.1.7	false	false	false	false	false	false	false	false	false
IMS-10087-CVDP-7BAC250C-E483-4282-8179-74EED9B8B94D		RKI	ncov	Human	B.1.1.7	20I (Alpha, V1)	2021-03-21	Europe	Germany	Nordrhein-Westfalen	Landkreis Köln; Stadt	Köln	50858	50.9243	6.8565		20I (Alpha, V1)	B.1.1.7	false	false	false	false	false	false	false	false	false
IMS-10150-CVDP-5852CAE7-38DA-4FA9-8533-A89B7B99932C		RKI	ncov	Human	B.1.1.7	20I (Alpha, V1)	2021-04-23	Europe	Germany	Rheinland-Pfalz	Landkreis Trier; kreisfreie Stadt	Trier	54290	49.7537	6.6393		20I (Alpha, V1)	B.1.1.7	false	false	false	false	false	false	false	false	false
6166ba5b81e18c1c41cecf0b	1091320322	IIMK	ncov	Human	B.1.1.7	20I (Alpha, V1)	2021-04-08	Europe	Germany	Thuringia	Landkreis Erfurt; Stadt	Erfurt	99096	50.9775	11.0251	1043	20I (Alpha, V1)	B.1.1.7	false	false	false	false	false	false	false	false	false
IMS-10267-CVDP-32B812D0-0540-457E-B58C-04F4F9102A83		RKI	ncov	Human	B.1.1.7	20I (Alpha, V1)	2021-03-12	Europe	Germany	Nordrhein-Westfalen	Landkreis Dortmund; Stadt	Dortmund	44137	51.5097	7.4601		20I (Alpha, V1)	B.1.1.7	false	false	false	false	false	false	false	false	false
IMS-10013-CVDP-AA9ECFB6-2DE7-414F-95DE-C2C94235989C		RKI	ncov	Human	B.1.1.7	20I (Alpha, V1)	2021-04-28	Europe	Germany	Hamburg	Landkreis Hamburg; Freie und Hansestadt	Hamburg	22339	53.5722	10.0031		20I (Alpha, V1)	B.1.1.7	false	false	false	false	false	false	false	false	false
IMS-10338-CVDP-36EDEEBA-2EC3-4D68-95EE-E5DC1123A1CE		RKI	ncov	Human	B.1.1.7	20I (Alpha, V1)	2021-02-05	Europe	Germany	Rheinland-Pfalz	Landkreis Ludwigshafen am Rhein; kreisfreie Stadt	Ludwigshafen am Rhein	67063	49.499	8.4109		20I (Alpha, V1)	B.1.1.7	false	false	false	false	false	false	false	false	false
IMS-10061-CVDP-D16C41C1-B391-4537-9320-7DD736FA7F64		RKI	ncov	Human	B.1.1.7	20I (Alpha, V1)	2021-04-06	Europe	Germany	Niedersachsen	Landkreis Region Hannover	Hannover	30159	52.3736	9.7371		20I (Alpha, V1)	B.1.1.7	false	false	false	false	false	false	false	false	false
IMS-10375-CVDP-03BF1028-095B-4FD2-A171-5FD0A0F50544		RKI	ncov	Human	B.1.1.7	20I (Alpha, V1)	2021-03-16	Europe	Germany	Baden-Württemberg	Landkreis Mannheim	Mannheim	68167	49.4996	8.4939		20I (Alpha, V1)	B.1.1.7	false	false	false	false	false	false	false	false	false
IMS-10116-CVDP-759A3F53-4904-493F-923C-E6B2934D4264		RKI	ncov	Human	B.1.1.7	20I (Alpha, V1)	2021-03-31	Europe	Germany	Baden-Württemberg	Landkreis Heidelberg	Heidelberg	69126	49.3757	8.6911		20I (Alpha, V1)	B.1.1.7	false	false	false	false	false	false	false	false	false
IMS-10375-CVDP-F8FC7D15-4FC9-4D4B-A7B8-E33738ADDFF8		RKI	ncov	Human	B.1.1.7	20I (Alpha, V1)	2021-02-24	Europe	Germany	Baden-Württemberg	Landkreis Mannheim	Mannheim	68167	49.4996	8.4939		20I (Alpha, V1)	B.1.1.7	false	false	false	false	false	false	false	false	false
IMS-10020-CVDP-FAACB47A-0F1B-4591-89E5-D604462C0CFF		RKI	ncov	Human	B.1.1.7	20I (Alpha, V1)	2021-03-10	Europe	Germany	Baden-Württemberg	Landkreis Esslingen	Leinfelden-Echterdingen	70771	48.6941	9.1681		20I (Alpha, V1)	B.1.1.7	false	false	false	false	false	false	false	false	false
IMS-10117-CVDP-2DB8F757-46F3-43C6-AE0E-BCE15542826F		RKI	ncov	Human	B.1.1.7	20I (Alpha, V1)	2021-04-19	Europe	Germany	Baden-Württemberg	Landkreis Rhein-Neckar-Kreis	Eppelheim	69214	49.4019	8.6364		20I (Alpha, V1)	B.1.1.7	false	false	false	false	false	false	false	false	false
IMS-10183-CVDP-3D3FCEE6-F2AC-4D1B-A76F-2BCAF5AB04B2		RKI	ncov	Human	B.1.1.7	20I (Alpha, V1)	2021-03-07	Europe	Germany	Hamburg	Landkreis Hamburg; Freie und Hansestadt	Hamburg	22081	53.5722	10.0031		20I (Alpha, V1)	B.1.1.7	false	false	false	false	false	false	false	false	false
IMS-10020-CVDP-70A8222E-575F-4DAF-AC31-4904695117BB		RKI	ncov	Human	B.1.1.7	20I (Alpha, V1)	2021-03-25	Europe	Germany	Baden-Württemberg	Landkreis Esslingen	Leinfelden-Echterdingen	70771	48.6941	9.1681		20I (Alpha, V1)	B.1.1.7	false	false	false	false	false	false	false	false	false
IMS-10020-CVDP-DA7C1476-9206-463C-8E55-796CAF3AF25B		RKI	ncov	Human	B.1.1.7	20I (Alpha, V1)	2021-03-18	Europe	Germany	Baden-Württemberg	Landkreis Esslingen	Leinfelden-Echterdingen	70771	48.6941	9.1681		20I (Alpha, V1)	B.1.1.7	false	false	false	false	false	false	false	false	false
IMS-10150-CVDP-9C62AF26-70E7-4589-8C38-3C687BD58734		RKI	ncov	Human	B.1.1.7	20I (Alpha, V1)	2021-04-21	Europe	Germany	Rheinland-Pfalz	Landkreis Trier; kreisfreie Stadt	Trier	54290	49.7537	6.6393		20I (Alpha, V1)	B.1.1.7	false	false	false	false	false	false	false	true	false
IMS-10013-CVDP-C9CBC82D-CA6D-4409-A704-3F48640C8624		RKI	ncov	Human	B.1.1.7	20I (Alpha, V1)	2021-03-16	Europe	Germany	Sachsen	Landkreis Nordsachsen	Wermsdorf	4779	51.2833	12.95		20I (Alpha, V1)	B.1.1.7	false	false	false	false	false	false	false	false	false
IMS-10117-CVDP-4DCA831B-8E1A-4B8F-B05E-44436D13322B		RKI	ncov	Human	B.1.1.7	20I (Alpha, V1)	2021-03-29	Europe	Germany	Baden-Württemberg	Landkreis Rhein-Neckar-Kreis	Eppelheim	69214	49.4019	8.6364		20I (Alpha, V1)	B.1.1.7	false	false	false	false	false	false	false	false	false
IMS-10036-CVDP-CD69C26C-AA63-443D-A92C-90482270D127		RKI	ncov	Human	B.1.1.7	20I (Alpha, V1)	2021-04-13	Europe	Germany	Bayern	Landkreis München	Planegg	82152	48.1067	11.4248		20I (Alpha, V1)	B.1.1.7	false	false	false	false	false	false	false	false	false
IMS-10020-CVDP-10109002-73CD-4A5B-B24A-1C1B4FB08198		RKI	ncov	Human	B.1.1.7	20I (Alpha, V1)	2021-04-13	Europe	Germany	Nordrhein-Westfalen	Landkreis Leverkusen; Stadt	Leverkusen	51375	51.0331	7.052		20I (Alpha, V1)	B.1.1.7	false	false	false	false	false	false	false	false	false
6166ba5b81e18c1c41cecc17	1050188875	IIMK	ncov	Human	B.1.1.7	20I (Alpha, V1)	2021-03-29	Europe	Germany	Thuringia	Landkreis Gera	Gera	7546	50.8753	12.0788	152	20I (Alpha, V1)	B.1.1.7	false	false	false	false	false	false	false	false	false
61792019ba758861d782eed2	DN00654_21050417	IIMK	ncov	Human	B.1.1.7	20I (Alpha, V1)	2021-05-20	Europe	Germany	Thuringia	Landkreis Sonneberg	Sonneberg	96515	50.3555	11.169	1184	20I (Alpha, V1)	B.1.1.7	false	false	false	false	false	false	false	false	false
IMS-10117-CVDP-7BD8FA2F-7F03-47F8-8913-403D200F86F3		RKI	ncov	Human	B.1.1.7	20I (Alpha, V1)	2021-03-30	Europe	Germany	Nordrhein-Westfalen	Landkreis Leverkusen; Stadt	Leverkusen	51375	51.0331	7.052		20I (Alpha, V1)	B.1.1.7	false	false	false	false	false	false	false	false	false
IMS-10218-CVDP-FA95E26C-18DA-486A-A83E-AC96F9803631		RKI	ncov	Human	B.1.1.7	20I (Alpha, V1)	2021-03-26	Europe	Germany	Sachsen-Anhalt	Landkreis Landeshauptstadt Magdeburg	Magdeburg	39104	52.1243	11.6322		20I (Alpha, V1)	B.1.1.7	false	false	false	false	false	false	false	false	false
6166ba5b81e18c1c41cecec0	1027790004	IIMK	ncov	Human	B.1.1.7	20I (Alpha, V1)	2021-04-07	Europe	Germany	Thuringia	Landkreis Saale-Holzland-Kreis	Stadtroda	7646	50.86	11.7281	867	20I (Alpha, V1)	B.1.1.7	false	false	false	false	false	false	false	false	false
IMS-10375-CVDP-B84C149F-CF35-4858-A6B9-A0243CC7B778		RKI	ncov	Human	B.1.1.7	20I (Alpha, V1)	2021-03-17	Europe	Germany	Baden-Württemberg	Landkreis Heidelberg	Heidelberg	69120	49.4169	8.6764		20I (Alpha, V1)	B.1.1.7	false	false	false	false	false	false	false	false	false
IMS-10004-CVDP-69B87BD8-950F-4380-80A5-2443EEACF548		RKI	ncov	Human	B.1.1.7	20I (Alpha, V1)	2021-03-22	Europe	Germany	Schleswig-Holstein	Kreis Herzogtum Lauenburg	Kreis Herzogtum Lauenburg	21502	53.5966	10.5762		20I (Alpha, V1)	B.1.1.7	false	false	false	false	false	false	false	false	false
6166ba5b81e18c1c41ced65f	1091340241	IIMK	ncov	Human	B.1.1.7	20I (Alpha, V1)	2021-04-28	Europe	Germany	Thuringia	Landkreis Unstrut-Hainich-Kreis	Bad Langensalza	99947	51.1089	10.6475	0	20I (Alpha, V1)	B.1.1.7	false	false	false	false	false	false	false	false	false
IMS-10122-CVDP-B9A72535-F841-4DC8-8174-126DF18830E2		RKI	ncov	Human	B.1.1.7	20I (Alpha, V1)	2021-03-01	Europe	Germany	Baden-Württemberg	Landkreis Karlsruhe	Karlsruhe	76131	49.0078	8.4199		20I (Alpha, V1)	B.1.1.7	false	false	false	false	false	false	false	false	false
IMS-10036-CVDP-2E4CA4A2-4886-4B55-9B6E-D52AF6205E89		RKI	ncov	Human	B.1.1.7	20I (Alpha, V1)	2021-04-07	Europe	Germany	Berlin	Landkreis Berlin; Stadt	Berlin	12247	52.4395	13.3462		20I (Alpha, V1)	B.1.1.7	false	false	false	false	false	false	false	false	false
IMS-10261-CVDP-BA2F8ABF-E205-4D2B-A5CB-3649408603DB		RKI	ncov	Human	B.1.1.7	20I (Alpha, V1)	2021-03-01	Europe	Germany	Nordrhein-Westfalen	Landkreis Lippe	Bad Salzuflen	32105	52.0808	8.7505		20I (Alpha, V1)	B.1.1.7	false	false	false	false	false	false	false	false	false
IMS-10013-CVDP-F50E1AF5-3699-4224-9E60-23C60C4C1CB0		RKI	ncov	Human	B.1.1.7	20I (Alpha, V1)	2021-03-31	Europe	Germany	Sachsen	Landkreis Nordsachsen	Wermsdorf	4779	51.2833	12.95		20I (Alpha, V1)	B.1.1.7	false	false	false	false	false	false	false	false	false
IMS-10020-CVDP-FF2C42D5-6D1B-4249-B4F1-D5E89D6C1123		RKI	ncov	Human	B.1.1.7	20I (Alpha, V1)	2021-03-16	Europe	Germany	Baden-Württemberg	Landkreis Esslingen	Leinfelden-Echterdingen	70771	48.6941	9.1681		20I (Alpha, V1)	B.1.1.7	false	false	false	false	false	false	false	false	false
IMS-10116-CVDP-A3551B05-FAC9-4BB2-A802-0E6EFED9F8C4		RKI	ncov	Human	B.1.1.7	20I (Alpha, V1)	2021-04-15	Europe	Germany	Sachsen	Kreisfreie Stadt Dresden	Dresden	1067	51.0628	13.7297		20I (Alpha, V1)	B.1.1.7	false	false	false	false	false	false	false	false	false
6166ba5c81e18c1c41cedba4	1024623480	IIMK	ncov	Human	B.1.1.7	20I (Alpha, V1)	2021-03-17	Europe	Germany	Thuringia	Landkreis Gotha	Gotha	99867	50.9461	10.6962	632	20I (Alpha, V1)	B.1.1.7	false	false	false	false	false	false	false	false	true
IMS-10117-CVDP-80C21781-C66E-4334-A036-37BF63DFE63D		RKI	ncov	Human	B.1.1.7	20I (Alpha, V1)	2021-05-02	Europe	Germany	Baden-Württemberg	Landkreis Rhein-Neckar-Kreis	Eppelheim	69214	49.4019	8.6364		20I (Alpha, V1)	B.1.1.7	false	false	false	false	false	false	false	false	false
IMS-10020-CVDP-B42D8BF2-9C9A-4B54-962B-8604020E0B85		RKI	ncov	Human	B.1.1.7	20I (Alpha, V1)	2021-04-15	Europe	Germany	Baden-Württemberg	Landkreis Esslingen	Leinfelden-Echterdingen	70771	48.6941	9.1681		20I (Alpha, V1)	Q.7	false	false	false	false	false	false	false	false	false
6166b85c81e18c1c41cec5fe	IMS-10013-CVDP-40e1df11-0c22-4b2e-9aa6-76fd40acac7b	IIMK	ncov	Human	B.1.1.7	20I (Alpha, V1)	2021-03-09	Europe	Germany	Thuringia	Landkreis Saale-Orla-Kreis	Triptis	7819	50.7355	11.8639	47	20I (Alpha, V1)	B.1.1.7	false	false	false	false	false	false	false	false	false
IMS-10087-CVDP-79BE0051-77A5-4C45-B241-F0631346D9AA		RKI	ncov	Human	B.1.1.7	20I (Alpha, V1)	2021-03-12	Europe	Germany	Nordrhein-Westfalen	Landkreis Köln; Stadt	Köln	50858	50.9243	6.8565		20I (Alpha, V1)	B.1.1.7	false	false	false	false	false	false	false	false	false
IMS-10116-CVDP-9E15D56D-218E-4F0A-AB79-233C8605483E		RKI	ncov	Human	B.1.1.7	20I (Alpha, V1)	2021-03-08	Europe	Germany	Nordrhein-Westfalen	Landkreis Essen; Stadt	Essen	45326	51.4844	7.005		20I (Alpha, V1)	B.1.1.7	false	false	false	false	false	false	false	false	false
IMS-10013-CVDP-FBECF9C6-779E-44EC-A8E4-05C3137BF711		RKI	ncov	Human	B.1.1.7	20I (Alpha, V1)	2021-04-01	Europe	Germany	Baden-Württemberg	Landkreis Karlsruhe	Karlsruhe	76199	48.9661	8.4043		20I (Alpha, V1)	B.1.1.7	false	false	false	false	false	false	false	false	false
IMS-10215-CVDP-6FB63BAA-F6C8-4D2A-81F3-1BB0BF5BC424		RKI	ncov	Human	B.1.1.7	20I (Alpha, V1)	2021-04-14	Europe	Germany	Sachsen	Kreisfreie Stadt Leipzig	Leipzig	4103	51.3405	12.3827		20I (Alpha, V1)	B.1.1.7	false	false	false	false	false	false	false	false	false
IMS-10004-CVDP-6A1AA137-AFAE-4809-919F-F029FE321482		RKI	ncov	Human	B.1.1.7	20I (Alpha, V1)	2021-04-06	Europe	Germany	Schleswig-Holstein	Kreis Herzogtum Lauenburg	Kreis Herzogtum Lauenburg	21502	53.5966	10.5762		20I (Alpha, V1)	B.1.1.7	false	false	false	false	false	false	false	false	false
IMS-10225-CVDP-44FC8B08-7176-4105-A603-D6202BA3342F		RKI	ncov	Human	B.1.1.7	20I (Alpha, V1)	2021-03-15	Europe	Germany	Nordrhein-Westfalen	Landkreis Köln; Stadt	Köln	50933	50.9427	6.8763		20I (Alpha, V1)	B.1.1.7	false	false	false	false	false	false	false	false	false
IMS-10020-CVDP-9374FB1E-3841-432A-B367-E0362509D378		RKI	ncov	Human	B.1.1.7	20I (Alpha, V1)	2021-02-16	Europe	Germany	Berlin	Landkreis Berlin; Stadt	Berlin	10829	52.4761	13.3607		20I (Alpha, V1)	B.1.1.7	false	false	false	false	false	false	false	false	false
IMS-10004-CVDP-F1826AB4-6FFA-4707-87AC-06F287834E21		RKI	ncov	Human	B.1.1.7	20I (Alpha, V1)	2021-04-16	Europe	Germany	Schleswig-Holstein	Kreis Herzogtum Lauenburg	Kreis Herzogtum Lauenburg	21502	53.5966	10.5762		20I (Alpha, V1)	B.1.1.7	false	false	false	false	false	false	false	false	false
IMS-10173-CVDP-13607B41-57A1-44FC-AEC8-EEAE07D1EB5C		RKI	ncov	Human	B.1.1.7	20I (Alpha, V1)	2021-04-19	Europe	Germany	Nordrhein-Westfalen	Landkreis Minden-Lübbecke	Bad Oeynhausen	32545	52.1917	8.8093		20I (Alpha, V1)	B.1.1.7	false	false	false	false	false	false	false	false	false
Wuhan/Hu-1/2019		National Institute for Communicable Disease Control and Prevention (ICDC) Chinese Center for Disease Control and Prevention (China CDC)	ncov	Human	B	19A	2019-12-26	Asia	China	Hubei		Wuhan					19A	B	false	false	false	false	false	false	false	false	false
IMS-10122-CVDP-30552C7D-DF6F-46E2-BFBC-98B180340284		RKI	ncov	Human	B.1.1.7	20I (Alpha, V1)	2021-03-22	Europe	Germany	Sachsen	Kreisfreie Stadt Dresden	Dresden	1239	51.0066	13.8089		20I (Alpha, V1)	B.1.1.7	false	false	false	false	false	false	false	false	false
IMS-10375-CVDP-78C9CD83-B3A3-4255-854B-8EF67B03AF75		RKI	ncov	Human	B.1.1.7	20I (Alpha, V1)	2021-03-09	Europe	Germany	Baden-Württemberg	Landkreis Heidelberg	Heidelberg	69120	49.4169	8.6764		20I (Alpha, V1)	B.1.1.7	false	false	false	false	false	false	false	false	false
IMS-10087-CVDP-892B8B8E-0187-420D-A883-0EBBE7C4CC0C		RKI	ncov	Human	B.1.1.7	20I (Alpha, V1)	2021-03-30	Europe	Germany	Nordrhein-Westfalen	Landkreis Köln; Stadt	Köln	50858	50.9243	6.8565		20I (Alpha, V1)	B.1.1.7	false	false	false	false	false	false	false	false	false
IMS-10150-CVDP-BBC6F637-A472-4FDC-A671-1FE58E21E1AF		RKI	ncov	Human	B.1.1.7	20I (Alpha, V1)	2021-05-04	Europe	Germany	Nordrhein-Westfalen	Landkreis Leverkusen; Stadt	Leverkusen	51375	51.0331	7.052		20I (Alpha, V1)	B.1.1.7	false	false	false	false	false	false	false	false	false
6166ba5c81e18c1c41cedf80	5002427620	IIMK	ncov	Human	B.1.1.7	20I (Alpha, V1)	2021-04-01	Europe	Germany	Thuringia	Landkreis Altenburger Land	Meuselwitz	4610	51.047	12.2976	651	20I (Alpha, V1)	B.1.1.7	false	false	false	false	false	false	false	false	false
IMS-10117-CVDP-79026B53-A012-4C5D-91A8-75BF40EF1E93		RKI	ncov	Human	B.1.1.7	20I (Alpha, V1)	2021-03-18	Europe	Germany	Baden-Württemberg	Landkreis Karlsruhe	Ettlingen	76275	48.9409	8.4076		20I (Alpha, V1)	Q.7	false	false	false	false	false	false	false	false	false
IMS-10013-CVDP-01439		RKI	ncov	Human	B.1.1.7	20I (Alpha, V1)	2021-02-02	Europe	Germany	Sachsen	Landkreis Nordsachsen	Wermsdorf	4779	51.2833	12.95		20I (Alpha, V1)	B.1.1.7	false	false	false	false	false	false	false	false	false
IMS-10020-CVDP-0C3F756B-711D-4F4A-A8D9-944E6B4B0FFF		RKI	ncov	Human	B.1.1.7	20I (Alpha, V1)	2021-04-13	Europe	Germany	Rheinland-Pfalz	Landkreis Trier; kreisfreie Stadt	Trier	54290	49.7537	6.6393		20I (Alpha, V1)	B.1.1.7	false	false	false	false	false	false	false	false	false
IMS-10117-CVDP-DFAB10DB-3B60-4DD9-A603-4D3FF7FA9049		RKI	ncov	Human	B.1.1.7	20I (Alpha, V1)	2021-03-16	Europe	Germany	Baden-Württemberg	Landkreis Rhein-Neckar-Kreis	Eppelheim	69214	49.4019	8.6364		20I (Alpha, V1)	B.1.1.7	false	false	false	false	false	false	false	false	false
IMS-10020-CVDP-F463C7AB-FC6A-4C26-91AF-01236A4D9DC0		RKI	ncov	Human	Q.1	20I (Alpha, V1)	2021-02-24	Europe	Germany	Berlin	Landkreis Berlin; Stadt	Berlin	10829	52.4761	13.3607		20I (Alpha, V1)	Q.1	false	false	false	false	false	false	false	false	false
IMS-10183-CVDP-742FA7D2-9415-4160-8DEC-AD5FF2810193		RKI	ncov	Human	B.1.1.7	20I (Alpha, V1)	2021-02-12	Europe	Germany	Bayern	Landkreis Kempten (Allgäu)	Kempten	87435	47.7184	10.3132		20I (Alpha, V1)	B.1.1.7	false	false	false	false	false	false	false	false	false
6166ba5b81e18c1c41ced166	1091327682	IIMK	ncov	Human	B.1.1.7	20I (Alpha, V1)	2021-04-14	Europe	Germany	Thuringia	Landkreis Saale-Orla-Kreis	Neustadt an der Orla	7806	50.7367	11.7444	0	20I (Alpha, V1)	B.1.1.7	false	false	false	false	false	false	false	false	false
IMS-10218-CVDP-A223D05E-8C87-47D8-997A-DE1327FA92FA		RKI	ncov	Human	B.1.1.7	20I (Alpha, V1)	2021-03-31	Europe	Germany	Sachsen-Anhalt	Landkreis Landeshauptstadt Magdeburg	Magdeburg	39104	52.1243	11.6322		20I (Alpha, V1)	B.1.1.7	false	false	false	false	false	false	false	false	false
IMS-10117-CVDP-2C898177-46B1-40E8-AB0B-52AC00B83EB8		RKI	ncov	Human	B.1.1.7	20I (Alpha, V1)	2021-03-10	Europe	Germany	Baden-Württemberg	Landkreis Karlsruhe	Ettlingen	76275	48.9409	8.4076		20I (Alpha, V1)	B.1.1.7	false	false	false	false	false	false	false	false	false
IMS-10082-CVDP-571E4141-8ABD-4DEE-997A-3CCD64967C5B		RKI	ncov	Human	B.1.1.7	20I (Alpha, V1)	2021-03-29	Europe	Germany	Nordrhein-Westfalen	Landkreis Bochum; Stadt	Bochum	44879	51.4271	7.1543		20I (Alpha, V1)	B.1.1.7	false	false	false	false	false	false	false	false	false
IMS-10020-CVDP-3305FFE7-CE34-4104-AE10-9DCFB9E15534		RKI	ncov	Human	B.1.1.7	20I (Alpha, V1)	2021-02-24	Europe	Germany	Bayern	Landkreis Weiden i.d.OPf.	Weiden	92637	49.6768	12.1561		20I (Alpha, V1)	B.1.1.7	false	false	false	false	false	false	false	false	false
IMS-10122-CVDP-31CD7501-3426-44C4-AA3E-E504CA8525DE		RKI	ncov	Human	B.1.1.7	20I (Alpha, V1)	2021-03-31	Europe	Germany	Bayern	Schweinfurt; Stadt	Schweinfurt	97422	50.0545	10.2441		20I (Alpha, V1)	B.1.1.7	false	false	false	false	false	false	false	false	true
IMS-10020-CVDP-6728A415-7944-47E1-8A1D-F951E32E5BE2		RKI	ncov	Human	B.1.1.7	20I (Alpha, V1)	2021-04-20	Europe	Germany	Nordrhein-Westfalen	Landkreis Leverkusen; Stadt	Leverkusen	51375	51.0331	7.052		20I (Alpha, V1)	B.1.1.7	false	false	false	false	false	false	false	false	false
6166ba5c81e18c1c41ced7b0	1000420571	IIMK	ncov	Human	B.1.1.7	20I (Alpha, V1)	2021-02-17	Europe	Germany	Thuringia	Landkreis Erfurt; Stadt	Erfurt	99084	50.9775	11.0251	66	20I (Alpha, V1)	B.1.1.7	false	false	false	false	false	false	false	false	true
6166ba5b81e18c1c41cece22	1024550703	IIMK	ncov	Human	B.1.1.7	20I (Alpha, V1)	2021-04-06	Europe	Germany	Thuringia	Landkreis Sömmerda	Rastenberg	99636	51.1757	11.4201	46	20I (Alpha, V1)	B.1.1.7	false	false	false	false	false	false	false	false	true
IMS-10173-CVDP-2DD2604D-1534-4F53-8CB5-F436CD8779DB		RKI	ncov	Human	B.1.1.7	20I (Alpha, V1)	2021-03-15	Europe	Germany	Nordrhein-Westfalen	Landkreis Minden-Lübbecke	Bad Oeynhausen	32545	52.1917	8.8093		20I (Alpha, V1)	B.1.1.7	false	false	false	false	false	false	false	false	false
IMS-10020-CVDP-E82F6C3F-F82E-4C57-BF1E-E0845AF2D525		RKI	ncov	Human	B.1.1.7	20I (Alpha, V1)	2021-04-08	Europe	Germany	Baden-Württemberg	Landkreis Esslingen	Leinfelden-Echterdingen	70771	48.6941	9.1681		20I (Alpha, V1)	B.1.1.7	false	false	false	false	false	false	false	false	false
IMS-10117-CVDP-48726710-C03A-411B-9A6C-409DAB5F83E7		RKI	ncov	Human	B.1.1.7	20I (Alpha, V1)	2021-04-01	Europe	Germany	Nordrhein-Westfalen	Landkreis Leverkusen; Stadt	Leverkusen	51375	51.0331	7.052		20I (Alpha, V1)	B.1.1.7	false	false	false	false	false	false	false	false	false
IMS-10587-CVDP-D3CE57A2-A633-4303-BD1D-187B152EF8B2		RKI	ncov	Human	B.1.1.7	20I (Alpha, V1)	2021-02-05	Europe	Germany	Hamburg	Landkreis Hamburg; Freie und Hansestadt	Hamburg	20095	53.5722	10.0031		20I (Alpha, V1)	B.1.1.7	false	false	false	false	false	false	false	false	false
IMS-10004-CVDP-5E4E74F6-41A2-4944-B28D-C86A073C8DBE		RKI	ncov	Human	B.1.1.7	20I (Alpha, V1)	2021-02-23	Europe	Germany	Schleswig-Holstein	Kreis Herzogtum Lauenburg	Kreis Herzogtum Lauenburg	21502	53.5966	10.5762		20I (Alpha, V1)	B.1.1.7	false	false	false	false	false	false	false	false	false
6166ba5b81e18c1c41ced453	1091333308	IIMK	ncov	Human	B.1.1.7	20I (Alpha, V1)	2021-04-20	Europe	Germany	Thuringia	Landkreis Unstrut-Hainich-Kreis	Mühlhausen	99974	51.2088	10.459	358	20I (Alpha, V1)	B.1.1.7	false	false	false	false	false	false	false	false	false
IMS-10087-CVDP-F1360636-F262-48BA-8938-1FF120FA9E53		RKI	ncov	Human	B.1.1.7	20I (Alpha, V1)	2021-03-12	Europe	Germany	Nordrhein-Westfalen	Landkreis Köln; Stadt	Köln	50858	50.9243	6.8565		20I (Alpha, V1)	B.1.1.7	false	false	false	false	false	false	false	false	false
6166b85c81e18c1c41cec874	IMS-10013-CVDP-3f1f3457-d9e5-4f5f-a80f-aa8ab5d4b409	IIMK	ncov	Human	B.1.1.7	20I (Alpha, V1)	2021-05-03	Europe	Germany	Thuringia	Landkreis Weimarer Land	Apolda	99510	51.0237	11.5128	14	20I (Alpha, V1)	B.1.1.7	false	false	false	false	false	false	false	false	true
IMS-10375-CVDP-C4D8F798-B79D-4ADE-9583-A849250E9868		RKI	ncov	Human	B.1.1.7	20I (Alpha, V1)	2021-03-22	Europe	Germany	Baden-Württemberg	Landkreis Heidelberg	Heidelberg	69120	49.4169	8.6764		20I (Alpha, V1)	B.1.1.7	false	false	false	false	false	false	false	false	false
IMS-10020-CVDP-87E99896-CC25-4D54-9AE3-5DB35271345C		RKI	ncov	Human	B.1.1.7	20I (Alpha, V1)	2021-03-29	Europe	Germany	Baden-Württemberg	Landkreis Esslingen	Leinfelden-Echterdingen	70771	48.6941	9.1681		20I (Alpha, V1)	B.1.1.7	false	false	false	false	false	false	false	false	false
IMS-10020-CVDP-2DA24F1E-EFD2-4125-BBDD-D1456899A094		RKI	ncov	Human	B.1.1.7	20I (Alpha, V1)	2021-03-22	Europe	Germany	Baden-Württemberg	Landkreis Esslingen	Leinfelden-Echterdingen	70771	48.6941	9.1681		20I (Alpha, V1)	B.1.1.7	false	false	false	false	false	false	false	false	false
IMS-10116-CVDP-309254F0-73CD-4AF9-82BA-0DEFB2864F30		RKI	ncov	Human	B.1.1.7	20I (Alpha, V1)	2021-03-31	Europe	Germany	Berlin	Landkreis Berlin; Stadt	Berlin	13407	52.5727	13.3512		20I (Alpha, V1)	B.1.1.7	false	false	false	false	false	false	false	false	false
IMS-10150-CVDP-050B5BA5-D337-419D-B440-2D17C68370C7		RKI	ncov	Human	B.1.1.7	20I (Alpha, V1)	2021-04-24	Europe	Germany	Rheinland-Pfalz	Landkreis Trier; kreisfreie Stadt	Trier	54290	49.7537	6.6393		20I (Alpha, V1)	B.1.1.7	false	false	false	false	false	false	false	false	true
IMS-10116-CVDP-71A25389-45A6-4232-9D93-8BD34EB6821E		RKI	ncov	Human	B.1.1.7	20I (Alpha, V1)	2021-05-07	Europe	Germany	Berlin	Landkreis Berlin; Stadt	Berlin	13407	52.5727	13.3512		20I (Alpha, V1)	B.1.1.7	false	false	false	false	false	false	false	false	false
IMS-10013-CVDP-407211C9-200E-499B-AB8F-30D00AE50989		RKI	ncov	Human	B.1.1.7	20I (Alpha, V1)	2021-03-17	Europe	Germany	Sachsen	Landkreis Nordsachsen	Wermsdorf	4779	51.2833	12.95		20I (Alpha, V1)	B.1.1.7	false	false	false	false	false	false	false	false	false
IMS-10061-CVDP-BA950597-0F30-4B98-B04C-87692CAB86F1		RKI	ncov	Human	B.1.1.7	20I (Alpha, V1)	2021-04-06	Europe	Germany	Nordrhein-Westfalen	Landkreis Essen; Stadt	Essen	45127	51.4535	7.0102		20I (Alpha, V1)	B.1.1.7	false	false	false	false	false	false	false	false	false
IMS-10013-CVDP-2087678F-2FFA-49C8-A711-8BE4744AF84B		RKI	ncov	Human	B.1.1.7	20I (Alpha, V1)	2021-02-19	Europe	Germany	Sachsen	Landkreis Nordsachsen	Wermsdorf	4779	51.2833	12.95		20I (Alpha, V1)	B.1.1.7	false	false	false	false	false	false	false	false	false
6166ba5c81e18c1c41ceda5d	1024628409	IIMK	ncov	Human	B.1.1.7	20I (Alpha, V1)	2021-03-11	Europe	Germany	Thuringia	Landkreis Gotha	Tambach-Dietharz	99897	50.7925	10.6157	254	20I (Alpha, V1)	B.1.1.7	false	false	false	false	false	false	false	false	true
IMS-10122-CVDP-D58C43BD-A56A-458D-8213-462DE8DE257C		RKI	ncov	Human	B.1.1.7	20I (Alpha, V1)	2021-03-29	Europe	Germany	Sachsen	Kreisfreie Stadt Leipzig	Leipzig	4289	51.3667	12.3833		20I (Alpha, V1)	B.1.1.7	false	false	false	false	false	false	false	false	false
IMS-10116-CVDP-3D6BD849-1CB4-4FD2-80BF-128B9CA7DF39		RKI	ncov	Human	B.1.1.7	20I (Alpha, V1)	2021-02-25	Europe	Germany	Nordrhein-Westfalen	Landkreis Essen; Stadt	Essen	45326	51.4844	7.005		20I (Alpha, V1)	B.1.1.7	false	false	false	false	false	false	false	false	false
IMS-10294-CVDP-EAA3C151-2FBB-47A6-A73C-4EE498B41413		RKI	ncov	Human	B.1.1.7	20I (Alpha, V1)	2021-04-27	Europe	Germany	Nordrhein-Westfalen	Landkreis Düsseldorf; Stadt	Düsseldorf	40210	51.2216	6.7897		20I (Alpha, V1)	B.1.1.7	false	false	false	false	false	false	false	false	false
IMS-10013-CVDP-F7C341BC-8489-410C-98EC-12D603164316		RKI	ncov	Human	B.1.1.7	20I (Alpha, V1)	2021-04-26	Europe	Germany	Sachsen	Landkreis Nordsachsen	Wermsdorf	4779	51.2833	12.95		20I (Alpha, V1)	B.1.1.7	false	false	false	false	false	false	false	false	false
IMS-10013-CVDP-5BDE568F-E481-4C68-81F8-9A48ACE7F195		RKI	ncov	Human	B.1.1.7	20I (Alpha, V1)	2021-02-09	Europe	Germany	Bremen	Kreisfreie Stadt Bremen	Bremen	28357	53.1178	8.8947		20I (Alpha, V1)	B.1.1.7	false	false	false	false	false	false	false	false	false
IMS-10146-CVDP-BB502F45-0D4B-4059-BB92-9817B65E938B		RKI	ncov	Human	B.1.1.7	20I (Alpha, V1)	2021-03-05	Europe	Germany	Baden-Württemberg	Landkreis Ulm; Stadt	Ulm	89073	48.4015	9.9927		20I (Alpha, V1)	B.1.1.7	false	false	false	false	false	false	false	false	false
IMS-10020-CVDP-61AA859C-9757-4F1D-ADC2-714FC0B7507A		RKI	ncov	Human	B.1.1.7	20I (Alpha, V1)	2021-02-12	Europe	Germany	Bayern	Landkreis Weiden i.d.OPf.	Weiden	92637	49.6768	12.1561		20I (Alpha, V1)	B.1.1.7	false	false	false	false	false	false	false	false	false
IMS-10061-CVDP-2D4EAFA5-7D08-44E5-ABA6-E3295A892CA5		RKI	ncov	Human	B.1.1.7	20I (Alpha, V1)	2021-04-08	Europe	Germany	Bayern	Landkreis Fürstenfeldbruck	Fürstenfeldbruck	82256	48.179	11.2547		20I (Alpha, V1)	B.1.1.7	false	false	false	false	false	false	false	false	false
IMS-10218-CVDP-170A85D2-F848-4A65-A1D3-E92DDFA7E892		RKI	ncov	Human	B.1.1.7	20I (Alpha, V1)	2021-04-08	Europe	Germany	Sachsen-Anhalt	Landkreis Landeshauptstadt Magdeburg	Magdeburg	39104	52.1243	11.6322		20I (Alpha, V1)	B.1.1.7	false	false	false	false	false	false	false	false	false
6166ba5b81e18c1c41ced1cc	1091328680	IIMK	ncov	Human	B.1.1.7	20I (Alpha, V1)	2021-04-16	Europe	Germany	Thuringia	Landkreis Ilm-Kreis	Arnstadt	99310	50.8343	10.9456	17	20I (Alpha, V1)	B.1.1.7	false	false	false	false	false	false	false	false	false
IMS-10150-CVDP-58A1122D-F399-402F-A5FD-9B144F6AAC6C		RKI	ncov	Human	B.1.1.7	20I (Alpha, V1)	2021-04-27	Europe	Germany	Nordrhein-Westfalen	Landkreis Leverkusen; Stadt	Leverkusen	51375	51.0331	7.052		20I (Alpha, V1)	B.1.1.7	false	false	false	false	false	false	false	false	false
IMS-10209-CVDP-1C4A0A47-419C-422C-A28B-369EA003C703		RKI	ncov	Human	B.1.1.7	20I (Alpha, V1)	2021-04-12	Europe	Germany	Baden-Württemberg	Landkreis Konstanz	Konstanz	78467	47.6744	9.1649		20I (Alpha, V1)	B.1.1.7	false	false	false	false	false	false	false	false	false
IMS-10020-CVDP-DED64B83-EF88-453B-9CC6-65C6A962E48A		RKI	ncov	Human	B.1.1.7	20I (Alpha, V1)	2021-04-08	Europe	Germany	Rheinland-Pfalz	Landkreis Trier; kreisfreie Stadt	Trier	54290	49.7537	6.6393		20I (Alpha, V1)	B.1.1.7	false	false	false	false	false	false	false	false	false
IMS-10013-CVDP-6A8BCB93-B673-4A74-BC74-770B82A17057		RKI	ncov	Human	B.1.1.7	20I (Alpha, V1)	2021-03-15	Europe	Germany	Sachsen	Landkreis Nordsachsen	Wermsdorf	4779	51.2833	12.95		20I (Alpha, V1)	B.1.1.7	false	false	false	false	false	false	false	false	false
IMS-10116-CVDP-C0DEE105-5F20-4383-865A-61C44B1AD0AE		RKI	ncov	Human	B.1.1.7	20I (Alpha, V1)	2021-05-06	Europe	Germany	Sachsen	Kreisfreie Stadt Dresden	Dresden	1067	51.0628	13.7297		20I (Alpha, V1)	B.1.1.7	false	false	false	false	false	false	false	false	false
IMS-10383-CVDP-B9F29CB6-DBA0-4541-B71F-C755D5002F07		RKI	ncov	Human	B.1.1.7	20I (Alpha, V1)	2021-03-09	Europe	Germany	Bayern	Passau; Stadt	Passau	94034	48.589	13.3971		20I (Alpha, V1)	B.1.1.7	false	false	false	false	false	false	false	false	false
IMS-10004-CVDP-3DE5E241-B517-4A81-9F04-3E828C48A90B		RKI	ncov	Human	B.1.1.7	20I (Alpha, V1)	2021-02-25	Europe	Germany	Schleswig-Holstein	Kreis Herzogtum Lauenburg	Kreis Herzogtum Lauenburg	21502	53.5966	10.5762		20I (Alpha, V1)	Q.7	false	false	false	false	false	false	false	false	false
IMS-10122-CVDP-DCF2B345-FF8C-429B-BD80-6DB27616CE37		RKI	ncov	Human	B.1.1.7	20I (Alpha, V1)	2021-04-23	Europe	Germany	Mecklenburg-Vorpommern	Landkreis Schwerin	Schwerin	19061	53.5992	11.404		20I (Alpha, V1)	B.1.1.7	false	false	false	false	false	false	false	false	false
IMS-10186-CVDP-8FBEBE1E-0D63-4B16-B4FD-651D70D06F7E		RKI	ncov	Human	B.1.1.7	20I (Alpha, V1)	2021-02-25	Europe	Germany	Nordrhein-Westfalen	Landkreis Düsseldorf; Stadt	Düsseldorf	40210	51.2216	6.7897		20I (Alpha, V1)	B.1.1.7	false	false	false	false	false	false	false	false	false
IMS-10186-CVDP-FD86CB4C-1FFC-4570-BBCB-D66F7E529B01		RKI	ncov	Human	B.1.1.7	20I (Alpha, V1)	2021-03-11	Europe	Germany	Nordrhein-Westfalen	Landkreis Düsseldorf; Stadt	Düsseldorf	40210	51.2216	6.7897		20I (Alpha, V1)	B.1.1.7	false	false	false	false	false	false	false	false	false
IMS-10020-CVDP-D7264031-95C3-4E82-9AB8-38B9678CFA97		RKI	ncov	Human	B.1.1.7	20I (Alpha, V1)	2021-03-23	Europe	Germany	Baden-Württemberg	Landkreis Esslingen	Leinfelden-Echterdingen	70771	48.6941	9.1681		20I (Alpha, V1)	B.1.1.7	false	false	false	false	false	false	false	false	false
IMS-10150-CVDP-E41F9440-2A38-48BE-9620-1F85E4E68F20		RKI	ncov	Human	B.1.1.7	20I (Alpha, V1)	2021-04-23	Europe	Germany	Nordrhein-Westfalen	Landkreis Leverkusen; Stadt	Leverkusen	51375	51.0331	7.052		20I (Alpha, V1)	B.1.1.7	false	false	false	false	false	false	false	false	false
IMS-10186-CVDP-004A38E6-3DCE-4182-A0F0-220E38C8F1B5		RKI	ncov	Human	B.1.1.7	20I (Alpha, V1)	2021-04-14	Europe	Germany	Nordrhein-Westfalen	Landkreis Düsseldorf; Stadt	Düsseldorf	40210	51.2216	6.7897		20I (Alpha, V1)	B.1.1.7	false	false	false	false	false	false	false	false	false
IMS-10020-CVDP-9E869B56-C394-4304-B77F-5179FC9E0F6A		RKI	ncov	Human	B.1.1.7	20I (Alpha, V1)	2021-03-12	Europe	Germany	Baden-Württemberg	Landkreis Esslingen	Leinfelden-Echterdingen	70771	48.6941	9.1681		20I (Alpha, V1)	B.1.1.7	false	false	false	false	false	false	false	false	false
IMS-10116-CVDP-CD6BA589-A009-4AD1-9C69-4FB8A9C04948		RKI	ncov	Human	B.1.1.7	20I (Alpha, V1)	2021-02-22	Europe	Germany	Sachsen	Kreisfreie Stadt Leipzig	Leipzig	4289	51.3667	12.3833		20I (Alpha, V1)	B.1.1.7	false	false	false	false	false	false	false	false	false
IMS-10293-CVDP-FC37B832-1B76-4B6E-846C-044D88295F56		RKI	ncov	Human	B.1.1.7	20I (Alpha, V1)	2021-04-14	Europe	Germany	Baden-Württemberg	Landkreis Stuttgart	Stuttgart	70191	48.7728	9.18184		20I (Alpha, V1)	B.1.1.7	false	false	false	false	false	false	false	false	false
IMS-10122-CVDP-79AC9DEE-02ED-49E6-A490-1348398B7F26		RKI	ncov	Human	B.1.1.7	20I (Alpha, V1)	2021-02-27	Europe	Germany	Baden-Württemberg	Landkreis Karlsruhe	Karlsruhe	76131	49.0078	8.4199		20I (Alpha, V1)	B.1.1.7	false	false	false	false	false	false	false	false	false
IMS-10218-CVDP-08415DA4-0C2D-4066-8C8F-B0608F9A544B		RKI	ncov	Human	B.1.1.7	20I (Alpha, V1)	2021-03-11	Europe	Germany	Sachsen-Anhalt	Landkreis Landeshauptstadt Magdeburg	Magdeburg	39104	52.1243	11.6322		20I (Alpha, V1)	B.1.1.7	false	false	false	false	false	false	false	false	false
IMS-10117-CVDP-7EA7716D-C6D3-4DAC-B4C6-CA4E52A3FF8A		RKI	ncov	Human	B.1.1.7	20I (Alpha, V1)	2021-03-29	Europe	Germany	Nordrhein-Westfalen	Landkreis Leverkusen; Stadt	Leverkusen	51375	51.0331	7.052		20I (Alpha, V1)	B.1.1.7	false	false	false	false	false	false	false	false	false
IMS-10213-CVDP-4653288A-B86B-4346-8125-2D8B32AAAA5B		RKI	ncov	Human	B.1.1.7	20I (Alpha, V1)	2021-04-19	Europe	Germany	Sachsen	Kreisfreie Stadt Dresden	Dresden	1067	51.0628	13.7297		20I (Alpha, V1)	B.1.1.7	false	false	false	false	true	false	false	false	false
IMS-10203-CVDP-93413911-FC4F-4D22-9BA4-D75288BEAA16		RKI	ncov	Human	B.1.1.7	20I (Alpha, V1)	2021-02-19	Europe	Germany	Hamburg	Landkreis Hamburg; Freie und Hansestadt	Hamburg	20095	53.5722	10.0031		20I (Alpha, V1)	B.1.1.7	false	false	false	false	false	false	false	false	false
IMS-10318-CVDP-40B26EE3-0660-44CD-AF3C-8A16267CFF73		RKI	ncov	Human	B.1.1.7	20I (Alpha, V1)	2021-04-16	Europe	Germany	Berlin	Landkreis Berlin; Stadt	Berlin	10627	52.508	13.303		20I (Alpha, V1)	B.1.1.7	false	false	false	false	false	false	false	false	false
6166b85c81e18c1c41cec5f7	IMS-10013-CVDP-a08e048d-65a9-4ebb-8725-31524a6b25be	IIMK	ncov	Human	B.1.1.7	20I (Alpha, V1)	2021-03-09	Europe	Germany	Thuringia	Landkreis Saale-Orla-Kreis	Ranis	7389	50.6613	11.5691	32	20I (Alpha, V1)	B.1.1.7	false	false	false	false	false	false	false	true	false
IMS-10146-CVDP-C42E8B7D-6995-492C-A1B4-48CE28EBAB6B		RKI	ncov	Human	B.1.1.7	20I (Alpha, V1)	2021-04-09	Europe	Germany	Baden-Württemberg	Landkreis Ulm; Stadt	Ulm	89073	48.4015	9.9927		20I (Alpha, V1)	B.1.1.7	false	false	false	false	false	false	false	false	false
6166ba5b81e18c1c41cece0d	1091317260	IIMK	ncov	Human	B.1.1.7	20I (Alpha, V1)	2021-04-04	Europe	Germany	Thuringia	Landkreis Ilm-Kreis	Arnstadt	99310	50.8343	10.9456	112	20I (Alpha, V1)	B.1.1.7	false	false	false	false	false	false	false	false	false
6166b85c81e18c1c41cec7c3	IMS-10013-CVDP-569966b0-8c22-49e6-a794-84f1cc69942e	IIMK	ncov	Human	B.1.1.7	20I (Alpha, V1)	2021-04-18	Europe	Germany	Thuringia	Landkreis Jena; Stadt	Jena	7743	50.9283	11.5853	267	20I (Alpha, V1)	B.1.1.7	false	false	false	false	false	false	false	false	false
IMS-10257-CVDP-022C2C7B-7D82-4F4A-A989-47CBD2EE93BF		RKI	ncov	Human	B.1.1.7	20I (Alpha, V1)	2021-04-15	Europe	Germany	Hessen	Landkreis Frankfurt am Main; Stadt	Frankfurt am Main	65926	50.096	8.7111		20I (Alpha, V1)	B.1.1.7	false	false	false	false	false	false	false	false	false
IMS-10020-CVDP-8F234C46-7F6C-4813-B6D4-5A0CF376E743		RKI	ncov	Human	B.1.1.7	20I (Alpha, V1)	2021-03-17	Europe	Germany	Baden-Württemberg	Landkreis Esslingen	Leinfelden-Echterdingen	70771	48.6941	9.1681		20I (Alpha, V1)	B.1.1.7	false	false	false	false	false	false	false	false	false
IMS-10013-CVDP-052DFBDB-45D9-4D01-A5DC-1F9B89AEFF9E		RKI	ncov	Human	B.1.1.7	20I (Alpha, V1)	2021-04-30	Europe	Germany	Hamburg	Landkreis Hamburg; Freie und Hansestadt	Hamburg	21079	53.5722	10.0031		20I (Alpha, V1)	B.1.1.7	false	false	false	false	false	false	false	false	false
IMS-10294-CVDP-3327291E-622D-432C-9DA5-2E8FA9C02D9C		RKI	ncov	Human	B.1.1.7	20I (Alpha, V1)	2021-04-15	Europe	Germany	Nordrhein-Westfalen	Landkreis Düsseldorf; Stadt	Düsseldorf	40210	51.2216	6.7897		20I (Alpha, V1)	Q.7	false	false	false	false	false	false	false	false	false
IMS-10087-CVDP-F69D98E2-2A25-4B48-9787-765A0E5D09DE		RKI	ncov	Human	B.1.1.7	20I (Alpha, V1)	2021-04-22	Europe	Germany	Nordrhein-Westfalen	Landkreis Köln; Stadt	Köln	50858	50.9243	6.8565		20I (Alpha, V1)	B.1.1.7	false	false	false	false	false	false	false	false	true
IMS-10117-CVDP-39C0FC47-BF00-4970-8A9A-31E43B3B4F27		RKI	ncov	Human	B.1.1.7	20I (Alpha, V1)	2021-03-25	Europe	Germany	Baden-Württemberg	Landkreis Rhein-Neckar-Kreis	Eppelheim	69214	49.4019	8.6364		20I (Alpha, V1)	B.1.1.7	false	false	false	false	false	false	false	false	false
IMS-10117-CVDP-F369B06A-295F-4AE3-8F7C-2D45471F2305		RKI	ncov	Human	B.1.1.7	20I (Alpha, V1)	2021-03-22	Europe	Germany	Baden-Württemberg	Landkreis Karlsruhe	Ettlingen	76275	48.9409	8.4076		20I (Alpha, V1)	B.1.1.7	false	false	false	false	false	false	false	false	false
IMS-10020-CVDP-6D723D67-B7CF-491D-A8CA-6E0F158D6B6D		RKI	ncov	Human	B.1.1.7	20I (Alpha, V1)	2021-03-30	Europe	Germany	Rheinland-Pfalz	Landkreis Trier; kreisfreie Stadt	Trier	54290	49.7537	6.6393		20I (Alpha, V1)	B.1.1.7	false	false	false	false	false	false	false	false	false
IMS-10013-CVDP-1B012968-094F-4FA3-8CBD-C041CFB9C639		RKI	ncov	Human	B.1.1.7	20I (Alpha, V1)	2021-03-03	Europe	Germany	Bayern	Landkreis Augsburg; Stadt	Augsburg	86154	48.3932	10.8814		20I (Alpha, V1)	B.1.1.7	false	false	false	false	false	false	false	false	false
IMS-10082-CVDP-948C5387-9A61-4854-99C7-907794A96521		RKI	ncov	Human	B.1.1.7	20I (Alpha, V1)	2021-03-29	Europe	Germany	Nordrhein-Westfalen	Landkreis Bochum; Stadt	Bochum	44879	51.4271	7.1543		20I (Alpha, V1)	B.1.1.7	false	false	false	false	false	false	false	false	false
607e97e8df98373a001384bd	AN8284	IIMK	ncov	Human	B.1.1.7	20I (Alpha, V1)	2021-04-01	Europe	Germany	Thuringia	Landkreis Unstrut-Hainich-Kreis	Mühlhausen	99974	51.2088	10.459	189	20I (Alpha, V1)	B.1.1.7	false	false	false	false	false	false	false	false	false
IMS-10587-CVDP-C2B3FC05-D2BA-4603-BAB6-D6AC07F5B25C		RKI	ncov	Human	B.1.1.7	20I (Alpha, V1)	2021-02-09	Europe	Germany	Hessen	Landkreis Gießen	Gießen	35392	50.5669	8.6538		20I (Alpha, V1)	B.1.1.7	false	false	false	false	false	false	false	false	false
IMS-10122-CVDP-7572890B-6980-4A34-973F-A56FECF3EDB5		RKI	ncov	Human	B.1.1.7	20I (Alpha, V1)	2021-04-27	Europe	Germany	Baden-Württemberg	Landkreis Karlsruhe	Karlsruhe	76131	49.0078	8.4199		20I (Alpha, V1)	B.1.1.7	false	false	false	false	false	false	false	false	false
IMS-10013-CVDP-912DDD95-4DCD-4224-85A7-D29FF4D030C8		RKI	ncov	Human	B.1.1.7	20I (Alpha, V1)	2021-04-16	Europe	Germany	Bayern	Landkreis Augsburg; Stadt	Augsburg	86154	48.3932	10.8814		20I (Alpha, V1)	B.1.1.7	false	false	false	false	false	false	false	false	false
IMS-10061-CVDP-508DFE8A-53F7-4F01-83CA-6B8AA3C5100E		RKI	ncov	Human	B.1.1.7	20I (Alpha, V1)	2021-03-12	Europe	Germany	Sachsen-Anhalt	Kreisfreie Stadt Halle	Halle	6112	51.4753	11.9973		20I (Alpha, V1)	B.1.1.7	false	false	false	false	false	false	false	false	false
IMS-10020-CVDP-56638C28-6C27-47FE-A582-C34801A43CAC		RKI	ncov	Human	B.1.1.7	20I (Alpha, V1)	2021-02-17	Europe	Germany	Baden-Württemberg	Landkreis Rhein-Neckar-Kreis	Eppelheim	69214	49.4019	8.6364		20I (Alpha, V1)	B.1.1.7	false	false	false	false	false	false	false	false	false
IMS-10061-CVDP-AF917088-B943-4371-9DE7-CB51DC70EE03		RKI	ncov	Human	B.1.1.7	20I (Alpha, V1)	2021-03-17	Europe	Germany	Nordrhein-Westfalen	Landkreis Essen; Stadt	Essen	45127	51.4535	7.0102		20I (Alpha, V1)	B.1.1.7	false	false	false	false	false	false	false	false	false
IMS-10146-CVDP-2B0DF60F-98B5-48D8-99B3-1444149090CC		RKI	ncov	Human	B.1.1.7	20I (Alpha, V1)	2021-04-01	Europe	Germany	Baden-Württemberg	Landkreis Ulm; Stadt	Ulm	89073	48.4015	9.9927		20I (Alpha, V1)	B.1.1.7	false	false	false	false	false	false	false	false	false
IMS-10006-CVDP-FA9BF547-F362-4DE5-B536-3B42B5AAC8E4		RKI	ncov	Human	B.1.1.7	20I (Alpha, V1)	2021-04-15	Europe	Germany	Sachsen	Kreisfreie Stadt Dresden	Dresden	1127	51.079	13.7208		20I (Alpha, V1)	B.1.1.7	false	false	false	false	false	false	false	false	false
IMS-10302-CVDP-FCB629DE-1E46-43C2-9BBF-B5A9D9A7E127		RKI	ncov	Human	B.1.1.7	20I (Alpha, V1)	2021-04-09	Europe	Germany	Bayern	Kreisfreie Stadt München	München	80336	48.1345	11.559		20I (Alpha, V1)	B.1.1.7	false	false	false	false	false	false	false	false	false
IMS-10004-CVDP-90C5F004-ED30-4F82-A4B6-1AF46D46395B		RKI	ncov	Human	B.1.1.7	20I (Alpha, V1)	2021-03-12	Europe	Germany	Schleswig-Holstein	Kreis Herzogtum Lauenburg	Kreis Herzogtum Lauenburg	21502	53.5966	10.5762		20I (Alpha, V1)	B.1.1.7	false	false	false	false	false	false	false	false	false
IMS-10020-CVDP-281B549A-39CD-4E0D-B974-5356BC961381		RKI	ncov	Human	B.1.1.7	20I (Alpha, V1)	2021-04-03	Europe	Germany	Berlin	Landkreis Berlin; Stadt	Berlin	10829	52.4761	13.3607		20I (Alpha, V1)	B.1.1.7	false	false	false	false	false	false	false	false	false
IMS-10261-CVDP-B298FF62-AB36-46C0-AC7D-6BE75BC1F23B		RKI	ncov	Human	B.1.1.7	20I (Alpha, V1)	2021-03-05	Europe	Germany	Nordrhein-Westfalen	Landkreis Lippe	Bad Salzuflen	32105	52.0808	8.7505		20I (Alpha, V1)	B.1.1.7	false	false	false	false	false	false	false	false	false
IMS-10020-CVDP-842A882C-DF25-430A-A170-38779C0D9A70		RKI	ncov	Human	B.1.1.7	20I (Alpha, V1)	2021-02-02	Europe	Germany	Bayern	Landkreis Weiden i.d.OPf.	Weiden	92637	49.6768	12.1561		20I (Alpha, V1)	B.1.1.7	false	false	false	false	false	false	false	false	false
IMS-10082-CVDP-D62AC184-D8FA-4DCB-95DB-F4A5C8BB3686		RKI	ncov	Human	B.1.1.7	20I (Alpha, V1)	2021-03-29	Europe	Germany	Nordrhein-Westfalen	Landkreis Bochum; Stadt	Bochum	44879	51.4271	7.1543		20I (Alpha, V1)	B.1.1.7	false	false	false	false	false	false	false	false	false
IMS-10116-CVDP-61C54D48-A442-486D-98C6-790D21587D04		RKI	ncov	Human	B.1.1.7	20I (Alpha, V1)	2021-03-08	Europe	Germany	Nordrhein-Westfalen	Landkreis Essen; Stadt	Essen	45326	51.4844	7.005		20I (Alpha, V1)	B.1.1.7	false	false	false	false	false	false	false	false	false
IMS-10020-CVDP-1CE1B874-AFE6-4A4A-A434-93E16E2BA03B		RKI	ncov	Human	B.1.1.7	20I (Alpha, V1)	2021-03-20	Europe	Germany	Baden-Württemberg	Landkreis Esslingen	Leinfelden-Echterdingen	70771	48.6941	9.1681		20I (Alpha, V1)	B.1.1.7	false	false	false	false	false	false	false	false	false
6166ba5b81e18c1c41ced396	1028313709	IIMK	ncov	Human	B.1.1.7	20I (Alpha, V1)	2021-04-21	Europe	Germany	Thuringia	Landkreis Ilm-Kreis	Arnstadt	99310	50.8343	10.9456	0	20I (Alpha, V1)	B.1.1.7	false	false	false	false	false	false	false	false	false
6166ba5b81e18c1c41ced193	1000421785	IIMK	ncov	Human	B.1.1.7	20I (Alpha, V1)	2021-04-15	Europe	Germany	Thuringia	Landkreis Erfurt; Stadt	Erfurt	99084	50.9775	11.0251	562	20I (Alpha, V1)	B.1.1.7	false	false	false	false	false	false	false	false	false
IMS-10218-CVDP-6A3E8248-608A-415B-92A8-ADFBE8724050		RKI	ncov	Human	B.1.1.7	20I (Alpha, V1)	2021-03-31	Europe	Germany	Sachsen-Anhalt	Landkreis Landeshauptstadt Magdeburg	Magdeburg	39104	52.1243	11.6322		20I (Alpha, V1)	B.1.1.7	false	false	false	false	false	false	false	false	false
IMS-10587-CVDP-A5B278B2-EA7D-455F-A757-3857D6A74A2B		RKI	ncov	Human	B.1.1.7	20I (Alpha, V1)	2021-02-22	Europe	Germany	Hamburg	Landkreis Hamburg; Freie und Hansestadt	Hamburg	20095	53.5722	10.0031		20I (Alpha, V1)	B.1.1.7	false	false	false	false	false	false	false	false	false
6166ba5c81e18c1c41ced907	1028312295	IIMK	ncov	Human	B.1.1.7	20I (Alpha, V1)	2021-03-05	Europe	Germany	Thuringia	Landkreis Ilm-Kreis	Arnstadt	99310	50.8343	10.9456	146	20I (Alpha, V1)	B.1.1.7	false	false	false	false	false	false	false	false	false
IMS-10261-CVDP-ADB98DFB-AFE7-4B3A-9C27-B0C323CC4C04		RKI	ncov	Human	B.1.1.7	20I (Alpha, V1)	2021-03-01	Europe	Germany	Nordrhein-Westfalen	Landkreis Lippe	Bad Salzuflen	32105	52.0808	8.7505		20I (Alpha, V1)	B.1.1.7	false	false	false	false	false	false	false	false	false
IMS-10183-CVDP-9A77E87E-6CCA-4DCA-A97E-B96F4CCC5EBB		RKI	ncov	Human	B.1.1.7	20I (Alpha, V1)	2021-04-06	Europe	Germany	Hamburg	Landkreis Hamburg; Freie und Hansestadt	Hamburg	22081	53.5722	10.0031		20I (Alpha, V1)	B.1.1.7	false	false	false	false	false	false	false	false	false
IMS-10582-CVDP-9675332D-1A8E-46DA-8BD9-AFE4C0F35271		RKI	ncov	Human	B.1.1.7	20I (Alpha, V1)	2021-04-28	Europe	Germany	Mecklenburg-Vorpommern	Kreisfreie Stadt Rostock	Rostock	18057	54.0872	12.1062		20I (Alpha, V1)	B.1.1.7	false	false	false	false	false	false	false	false	false
6166ba5b81e18c1c41cecd84	1091314693	IIMK	ncov	Human	B.1.1.7	20I (Alpha, V1)	2021-04-01	Europe	Germany	Thuringia	Landkreis Unstrut-Hainich-Kreis	Mühlhausen	99974	51.2088	10.459	109	20I (Alpha, V1)	B.1.1.7	false	false	false	false	false	true	false	false	false
IMS-10117-CVDP-98DE197D-1AE8-44F7-9D82-2307BE5D1BE0		RKI	ncov	Human	B.1.1.7	20I (Alpha, V1)	2021-04-27	Europe	Germany	Baden-Württemberg	Landkreis Rhein-Neckar-Kreis	Eppelheim	69214	49.4019	8.6364		20I (Alpha, V1)	B.1.1.7	false	false	false	false	false	false	false	false	false
IMS-10117-CVDP-E715EA16-27AC-4BA5-9E39-9717FAA5B8DB		RKI	ncov	Human	B.1.1.7	20I (Alpha, V1)	2021-03-18	Europe	Germany	Nordrhein-Westfalen	Landkreis Leverkusen; Stadt	Leverkusen	51375	51.0331	7.052		20I (Alpha, V1)	B.1.1.7	false	false	false	false	false	false	false	false	false
IMS-10030-CVDP-25A4AC3A-CDB0-4B0B-BD08-A3B82CC5A03A		RKI	ncov	Human	B.1.1.7	20I (Alpha, V1)	2021-02-22	Europe	Germany	Berlin	Landkreis Berlin; Stadt	Berlin	13347	52.5491	13.3655		20I (Alpha, V1)	B.1.1.7	false	false	false	false	false	false	false	false	false
IMS-10006-CVDP-8F865508-6FD1-46CA-8A59-09088A115C8B		RKI	ncov	Human	B.1.1.7	20I (Alpha, V1)	2021-04-03	Europe	Germany	Sachsen	Kreisfreie Stadt Dresden	Dresden	1127	51.079	13.7208		20I (Alpha, V1)	B.1.1.7	false	false	false	false	false	false	false	false	false
IMS-10087-CVDP-CAA073AB-27AE-4790-8135-5844A507EBAF		RKI	ncov	Human	B.1.1.7	20I (Alpha, V1)	2021-03-18	Europe	Germany	Nordrhein-Westfalen	Landkreis Köln; Stadt	Köln	50858	50.9243	6.8565		20I (Alpha, V1)	B.1.1.7	false	false	false	false	false	false	false	false	false
IMS-10116-CVDP-219DB047-1274-4459-90A8-E1F9C180E692		RKI	ncov	Human	B.1.1.7	20I (Alpha, V1)	2021-03-20	Europe	Germany	Berlin	Landkreis Berlin; Stadt	Berlin	13407	52.5727	13.3512		20I (Alpha, V1)	B.1.1.7	false	false	false	false	false	false	false	false	false
IMS-10020-CVDP-537B907E-BD3E-4414-882B-40F2B437E52A		RKI	ncov	Human	B.1.1.7	20I (Alpha, V1)	2021-03-31	Europe	Germany	Rheinland-Pfalz	Landkreis Trier; kreisfreie Stadt	Trier	54290	49.7537	6.6393		20I (Alpha, V1)	B.1.1.7	false	false	false	false	false	false	false	false	false
IMS-10594-CVDP-71EA4289-AC58-411A-B46D-666B633E82BF		RKI	ncov	Human	B.1.1.7	20I (Alpha, V1)	2021-04-06	Europe	Germany	Nordrhein-Westfalen	Landkreis Münster; Stadt	Münster	48153	51.9268	7.6313		20I (Alpha, V1)	B.1.1.7	false	false	false	false	false	false	false	false	false
IMS-10587-CVDP-A6ED8BBB-4602-4435-8F32-CB4B929B3113		RKI	ncov	Human	B.1.1.7	20I (Alpha, V1)	2021-03-29	Europe	Germany	Hamburg	Landkreis Hamburg; Freie und Hansestadt	Hamburg	20095	53.5722	10.0031		20I (Alpha, V1)	B.1.1.7	false	false	false	false	false	false	false	false	false
IMS-10087-CVDP-00F44063-6724-47B7-A701-8CD4AB95255C		RKI	ncov	Human	B.1.1.7	20I (Alpha, V1)	2021-03-18	Europe	Germany	Nordrhein-Westfalen	Landkreis Köln; Stadt	Köln	50858	50.9243	6.8565		20I (Alpha, V1)	B.1.1.7	false	false	false	false	false	false	false	false	false
IMS-10023-CVDP-D4FAD1D5-9205-4AF9-9347-DB372C27FDFC		RKI	ncov	Human	B.1.1.7	20I (Alpha, V1)	2021-03-03	Europe	Germany	Sachsen	Landkreis Erzgebirgskreis	Neukirchen/Erzgebirge	9221	50.7835	12.87		20I (Alpha, V1)	B.1.1.7	false	false	false	false	false	false	false	false	false
IMS-10013-CVDP-A61FF6F1-6BCA-467D-BE3E-C54335C19641		RKI	ncov	Human	B.1.1.7	20I (Alpha, V1)	2021-04-27	Europe	Germany	Sachsen	Landkreis Nordsachsen	Wermsdorf	4779	51.2833	12.95		20I (Alpha, V1)	B.1.1.7	false	false	false	false	false	false	false	false	false
IMS-10587-CVDP-A4B73574-D44C-4602-8AB2-26DD3A8D2EDE		RKI	ncov	Human	B.1.1.7	20I (Alpha, V1)	2021-02-18	Europe	Germany	Hamburg	Landkreis Hamburg; Freie und Hansestadt	Hamburg	20095	53.5722	10.0031		20I (Alpha, V1)	B.1.1.7	false	false	false	false	false	false	false	false	false
IMS-10215-CVDP-913B21DB-A426-4877-8BBF-D6310B09516E		RKI	ncov	Human	B.1.1.7	20I (Alpha, V1)	2021-04-24	Europe	Germany	Sachsen	Kreisfreie Stadt Leipzig	Leipzig	4103	51.3405	12.3827		20I (Alpha, V1)	B.1.1.7	false	false	false	false	false	false	false	false	false
IMS-10117-CVDP-6123BE2B-D001-4544-A2DB-1AF1B3EF6C1D		RKI	ncov	Human	B.1.1.7	20I (Alpha, V1)	2021-03-12	Europe	Germany	Nordrhein-Westfalen	Landkreis Leverkusen; Stadt	Leverkusen	51375	51.0331	7.052		20I (Alpha, V1)	B.1.1.7	false	false	false	false	false	false	false	false	false
IMS-10122-CVDP-ADEF9374-06E7-4487-BD00-3DBB9C15CC5A		RKI	ncov	Human	B.1.1.7	20I (Alpha, V1)	2021-02-23	Europe	Germany	Sachsen	Kreisfreie Stadt Dresden	Dresden	1239	51.0066	13.8089		20I (Alpha, V1)	B.1.1.7	false	false	false	false	false	false	false	false	false
IMS-10587-CVDP-B0938820-3EF3-4820-9DB2-73F3B4EFB579		RKI	ncov	Human	B.1.1.7	20I (Alpha, V1)	2021-03-05	Europe	Germany	Hamburg	Landkreis Hamburg; Freie und Hansestadt	Hamburg	20095	53.5722	10.0031		20I (Alpha, V1)	B.1.1.7	false	false	false	false	false	false	false	false	false
IMS-10302-CVDP-12850F34-BE60-4DF7-93C3-532E69E5888F		RKI	ncov	Human	B.1.1.7	20I (Alpha, V1)	2021-02-03	Europe	Germany	Bayern	Landkreis Augsburg; Stadt	Augsburg	86156	48.3815	10.8548		20I (Alpha, V1)	B.1.1.7	false	false	false	false	false	false	false	false	false
IMS-10020-CVDP-C3A8B2A1-35A1-4CD4-A824-8E3ABD0A78FD		RKI	ncov	Human	B.1.1.7	20I (Alpha, V1)	2021-05-02	Europe	Germany	Baden-Württemberg	Landkreis Esslingen	Leinfelden-Echterdingen	70771	48.6941	9.1681		20I (Alpha, V1)	Q.7	false	false	false	false	false	false	false	false	false
IMS-10150-CVDP-3233BB0B-A175-45B7-AA90-D5FA04C042C9		RKI	ncov	Human	B.1.1.7	20I (Alpha, V1)	2021-04-28	Europe	Germany	Rheinland-Pfalz	Landkreis Trier; kreisfreie Stadt	Trier	54290	49.7537	6.6393		20I (Alpha, V1)	B.1.1.7	false	false	false	false	false	false	false	false	false
6166ba5b81e18c1c41cecf5f	1091320981	IIMK	ncov	Human	B.1.1.7	20I (Alpha, V1)	2021-04-08	Europe	Germany	Thuringia	Landkreis Jena; Stadt	Jena	7745	50.9283	11.5853	52	20I (Alpha, V1)	B.1.1.7	false	false	false	false	false	false	false	false	false
6166ba5c81e18c1c41ced782	1024624724	IIMK	ncov	Human	B.1.1.7	20I (Alpha, V1)	2021-02-27	Europe	Germany	Thuringia	Landkreis Gotha	Gotha	99867	50.9461	10.6962	48	20I (Alpha, V1)	B.1.1.7	false	false	false	false	false	false	false	false	false
IMS-10013-CVDP-396FAA48-D774-488A-A0AB-33095ED501F2		RKI	ncov	Human	B.1.1.7	20I (Alpha, V1)	2021-02-17	Europe	Germany	Rheinland-Pfalz	Landkreis Mainz; kreisfreie Stadt	Mainz	55129	49.9661	8.2663		20I (Alpha, V1)	B.1.1.7	false	false	false	false	false	false	false	false	false
6050d93024f3782c72e1efcb	AN5617	IIMK	ncov	Human	B.1.1.7	20I (Alpha, V1)	2021-03-04	Europe	Germany	Thuringia	Landkreis Schmalkalden-Meiningen	Meiningen	98617	50.5678	10.4164	189	20I (Alpha, V1)	B.1.1.7	false	false	false	false	false	false	false	false	false
60a37c9d292136361c620527	DN00398_26030168	IIMK	ncov	Human	B.1.1.7	20I (Alpha, V1)	2021-03-26	Europe	Germany	Thuringia	Landkreis Greiz	Berga/Elster	7980	50.7503	12.1607	189	20I (Alpha, V1)	B.1.1.7	false	false	false	false	false	false	false	true	false
6166ba5c81e18c1c41ced9b9	1091290334	IIMK	ncov	Human	B.1.1.7	20I (Alpha, V1)	2021-03-09	Europe	Germany	Thuringia	Landkreis Unstrut-Hainich-Kreis	Rodeberg	99976	51.2479	10.3519	180	20I (Alpha, V1)	B.1.1.7	false	false	false	false	false	false	false	false	false
IMS-10030-CVDP-00039		RKI	ncov	Human	B.1.1.7	20I (Alpha, V1)	2021-02-05	Europe	Germany	Berlin	Landkreis Berlin; Stadt	Berlin	13347	52.5491	13.3655		20I (Alpha, V1)	B.1.1.7	false	false	false	false	false	false	false	false	false
IMS-10004-CVDP-64ABD238-B4B8-4CB1-BB3B-E2989AA5B604		RKI	ncov	Human	B.1.1.7	20I (Alpha, V1)	2021-03-02	Europe	Germany	Schleswig-Holstein	Kreis Herzogtum Lauenburg	Kreis Herzogtum Lauenburg	21502	53.5966	10.5762		20I (Alpha, V1)	B.1.1.7	false	false	false	false	false	false	false	false	false
IMS-10020-CVDP-A1B0ABA0-695C-4B64-91C5-254C54D59E08		RKI	ncov	Human	B.1.1.7	20I (Alpha, V1)	2021-02-18	Europe	Germany	Bayern	Landkreis Weiden i.d.OPf.	Weiden	92637	49.6768	12.1561		20I (Alpha, V1)	B.1.1.7	false	false	false	false	false	false	false	false	false
IMS-10122-CVDP-9B2F0237-24BC-4C9D-AE62-A949AC4B97C9		RKI	ncov	Human	B.1.1.7	20I (Alpha, V1)	2021-03-04	Europe	Germany	Baden-Württemberg	Landkreis Karlsruhe	Karlsruhe	76131	49.0078	8.4199		20I (Alpha, V1)	B.1.1.7	false	false	false	false	false	false	false	false	false
IMS-10116-CVDP-A48BA546-8D72-42A7-847D-8443FF679073		RKI	ncov	Human	B.1.1.7	20I (Alpha, V1)	2021-04-19	Europe	Germany	Nordrhein-Westfalen	Landkreis Essen; Stadt	Essen	45326	51.4844	7.005		20I (Alpha, V1)	B.1.1.7	false	false	false	false	false	false	false	true	false
6166ba5b81e18c1c41cecb6b	1091349890	IIMK	ncov	Human	B.1.1.7	20I (Alpha, V1)	2021-05-08	Europe	Germany	Thuringia	Landkreis Ilm-Kreis	Arnstadt	99310	50.8343	10.9456	200	20I (Alpha, V1)	B.1.1.7	false	false	false	false	false	false	false	false	false
6166ba5b81e18c1c41ced1a8	1024550813	IIMK	ncov	Human	B.1.1.7	20I (Alpha, V1)	2021-04-15	Europe	Germany	Thuringia	Landkreis Erfurt; Stadt	Erfurt	99084	50.9775	11.0251	30	20I (Alpha, V1)	B.1.1.7	false	false	false	false	false	false	false	false	false
IMS-10116-CVDP-1D60C295-2EE9-4524-B645-DB2705E9F677		RKI	ncov	Human	B.1.1.7	20I (Alpha, V1)	2021-04-09	Europe	Germany	Baden-Württemberg	Landkreis Heidelberg	Heidelberg	69126	49.3757	8.6911		20I (Alpha, V1)	B.1.1.7	false	false	false	false	false	false	false	false	false
6166ba5b81e18c1c41ced2aa	1050209837	IIMK	ncov	Human	B.1.1.7	20I (Alpha, V1)	2021-04-18	Europe	Germany	Thuringia	Landkreis Gera	Gera	7549	50.8753	12.0788	276	20I (Alpha, V1)	B.1.1.7	false	false	false	false	false	false	false	false	false
IMS-10337-CVDP-E591E999-02DD-438B-A597-6B0A73847DAC		RKI	ncov	Human	B.1.1.7	20I (Alpha, V1)	2021-03-08	Europe	Germany	Schleswig-Holstein	Landkreis Lübeck; Hansestadt	Lübeck	23538	53.8696	10.6871		20I (Alpha, V1)	B.1.1.7	false	false	false	false	false	false	false	false	false
IMS-10020-CVDP-B2EA4313-FAE4-4E4F-8857-A42204FAC97C		RKI	ncov	Human	B.1.1.7	20I (Alpha, V1)	2021-03-11	Europe	Germany	Baden-Württemberg	Landkreis Esslingen	Leinfelden-Echterdingen	70771	48.6941	9.1681		20I (Alpha, V1)	B.1.1.7	false	false	false	false	false	false	false	false	false
6166ba5b81e18c1c41ced3ee	1024628854	IIMK	ncov	Human	B.1.1.7	20I (Alpha, V1)	2021-04-23	Europe	Germany	Thuringia	Landkreis Gotha	Gotha	99867	50.9461	10.6962	0	20I (Alpha, V1)	B.1.1.7	false	false	false	false	false	false	false	false	false
IMS-10020-CVDP-9BAA1774-D063-4734-B191-81B592E5974C		RKI	ncov	Human	B.1.1.7	20I (Alpha, V1)	2021-03-18	Europe	Germany	Baden-Württemberg	Landkreis Esslingen	Leinfelden-Echterdingen	70771	48.6941	9.1681		20I (Alpha, V1)	B.1.1.7	false	false	false	false	false	false	false	false	false
IMS-10020-CVDP-930924D2-1A09-405D-A84B-6DBB812F34D6		RKI	ncov	Human	B.1.1.7	20I (Alpha, V1)	2021-04-17	Europe	Germany	Rheinland-Pfalz	Landkreis Trier; kreisfreie Stadt	Trier	54290	49.7537	6.6393		20I (Alpha, V1)	B.1.1.7	false	false	false	false	false	false	false	false	false
6166ba5c81e18c1c41cedf02	1024586396	IIMK	ncov	Human	B.1.1.7	20I (Alpha, V1)	2021-03-29	Europe	Germany	Thuringia	Landkreis Eichsfeld	Heiligenstadt	37308	51.378	10.1376	58	20I (Alpha, V1)	B.1.1.7	false	false	false	false	false	false	false	false	false
IMS-10013-CVDP-DC657652-4096-4E5F-8652-5617C9BF2D05		RKI	ncov	Human	B.1.1.7	20I (Alpha, V1)	2021-03-05	Europe	Germany	Hamburg	Landkreis Hamburg; Freie und Hansestadt	Hamburg	21079	53.5722	10.0031		20I (Alpha, V1)	B.1.1.7	false	false	false	false	false	false	false	false	false
IMS-10061-CVDP-29233FF6-BF86-4CAF-AC4B-9484D80B3406		RKI	ncov	Human	B.1.1.7	20I (Alpha, V1)	2021-03-22	Europe	Germany	Nordrhein-Westfalen	Landkreis Köln; Stadt	Köln	50996	50.8834	6.9902		20I (Alpha, V1)	B.1.1.7	false	false	false	false	false	false	false	false	false
IMS-10020-CVDP-A70CFE0B-42EE-4A71-803D-27B76490EFDF		RKI	ncov	Human	B.1.1.7	20I (Alpha, V1)	2021-02-24	Europe	Germany	Rheinland-Pfalz	Landkreis Trier; kreisfreie Stadt	Trier	54290	49.7537	6.6393		20I (Alpha, V1)	B.1.1.7	false	false	false	false	false	false	false	false	false
IMS-10020-CVDP-FAF2E7BE-E7E2-4823-A8F0-4B34DBAB83D6		RKI	ncov	Human	B.1.1.7	20I (Alpha, V1)	2021-04-12	Europe	Germany	Baden-Württemberg	Landkreis Esslingen	Leinfelden-Echterdingen	70771	48.6941	9.1681		20I (Alpha, V1)	B.1.1.7	false	false	false	false	false	false	false	false	false
IMS-10020-CVDP-E861924E-CE97-4A3B-89FC-0A80E8D4FD07		RKI	ncov	Human	B.1.1.7	20I (Alpha, V1)	2021-03-26	Europe	Germany	Bayern	Landkreis Weiden i.d.OPf.	Weiden	92637	49.6768	12.1561		20I (Alpha, V1)	B.1.1.7	false	false	false	false	false	false	false	false	false
IMS-10013-CVDP-1B0EF66E-C1AD-4F0F-8199-73A36E275F9B		RKI	ncov	Human	B.1.1.7	20I (Alpha, V1)	2021-03-22	Europe	Germany	Sachsen	Landkreis Nordsachsen	Wermsdorf	4779	51.2833	12.95		20I (Alpha, V1)	B.1.1.7	false	false	false	false	false	false	false	false	false
IMS-10004-CVDP-3EB6B5CA-4C6E-44C2-8BE0-3D7485F1DF64		RKI	ncov	Human	B.1.1.7	20I (Alpha, V1)	2021-04-19	Europe	Germany	Schleswig-Holstein	Kreis Herzogtum Lauenburg	Kreis Herzogtum Lauenburg	21502	53.5966	10.5762		20I (Alpha, V1)	B.1.1.7	false	false	false	false	false	false	false	false	false
IMS-10013-CVDP-AE0E5169-BAB7-4B2D-AD43-27B0B481C961		RKI	ncov	Human	B.1.1.7	20I (Alpha, V1)	2021-02-18	Europe	Germany	Sachsen	Landkreis Nordsachsen	Wermsdorf	4779	51.2833	12.95		20I (Alpha, V1)	B.1.1.7	false	false	false	false	false	false	false	false	false
6166ba5b81e18c1c41cecd46	1024586436	IIMK	ncov	Human	B.1.1.7	20I (Alpha, V1)	2021-03-30	Europe	Germany	Thuringia	Landkreis Eichsfeld	Worbis	37339	51.4188	10.3625	875	20I (Alpha, V1)	B.1.1.7	false	false	false	false	false	false	false	false	false
IMS-10150-CVDP-28A4C2FB-7BDE-4985-BD09-5B634725CB97		RKI	ncov	Human	B.1.1.7	20I (Alpha, V1)	2021-04-30	Europe	Germany	Nordrhein-Westfalen	Landkreis Leverkusen; Stadt	Leverkusen	51375	51.0331	7.052		20I (Alpha, V1)	B.1.1.7	false	false	false	false	false	false	false	false	false
60a37c9d292136361c6204cb	DN00306_10032275	IIMK	ncov	Human	B.1.1.7	20I (Alpha, V1)	2021-03-10	Europe	Germany	Thuringia	Landkreis Saale-Orla-Kreis	Saalburg-Ebersdorf	7929	50.5022	11.7325	1470	20I (Alpha, V1)	B.1.1.7	false	false	false	false	false	false	false	false	false
IMS-10375-CVDP-4F183CA5-2692-46F3-95D8-DFA937C3D710		RKI	ncov	Human	B.1.1.7	20I (Alpha, V1)	2021-04-29	Europe	Germany	Baden-Württemberg	Landkreis Heidelberg	Heidelberg	69120	49.4169	8.6764		20I (Alpha, V1)	B.1.1.7	false	false	false	false	false	false	false	false	false
IMS-10267-CVDP-00052		RKI	ncov	Human	B.1.1.7	20I (Alpha, V1)	2021-02-01	Europe	Germany	Nordrhein-Westfalen	Landkreis Dortmund; Stadt	Dortmund	44137	51.5097	7.4601		20I (Alpha, V1)	B.1.1.7	false	false	false	false	false	false	false	false	false
IMS-10013-CVDP-B6B73E02-6969-4E7D-BA2B-D5D475E5D31A		RKI	ncov	Human	B.1.1.7	20I (Alpha, V1)	2021-03-31	Europe	Germany	Sachsen	Landkreis Nordsachsen	Wermsdorf	4779	51.2833	12.95		20I (Alpha, V1)	B.1.1.7	false	false	false	false	false	false	false	false	false
IMS-10218-CVDP-AC2BD397-3BFA-4AFE-94C6-3A9BE389A2FA		RKI	ncov	Human	B.1.1.7	20I (Alpha, V1)	2021-03-05	Europe	Germany	Sachsen-Anhalt	Landkreis Landeshauptstadt Magdeburg	Magdeburg	39104	52.1243	11.6322		20I (Alpha, V1)	B.1.1.7	false	false	false	false	false	false	false	false	false
IMS-10150-CVDP-B50AF062-2BB0-4325-9198-FD11252618D4		RKI	ncov	Human	B.1.1.7	20I (Alpha, V1)	2021-04-27	Europe	Germany	Rheinland-Pfalz	Landkreis Trier; kreisfreie Stadt	Trier	54290	49.7537	6.6393		20I (Alpha, V1)	B.1.1.7	false	false	false	false	false	false	false	false	false
IMS-10375-CVDP-734378AE-676C-498D-A9BB-5070D196E12C		RKI	ncov	Human	B.1.1.7	20I (Alpha, V1)	2021-03-19	Europe	Germany	Baden-Württemberg	Landkreis Heidelberg	Heidelberg	69120	49.4169	8.6764		20I (Alpha, V1)	B.1.1.7	false	false	false	false	false	false	false	false	false
IMS-10227-CVDP-F6E5B954-10BF-4E0E-983B-D0E4C90FB407		RKI	ncov	Human	B.1.1.7	20I (Alpha, V1)	2021-04-09	Europe	Germany	Nordrhein-Westfalen	Landkreis Düsseldorf; Stadt	Düsseldorf	40477	51.2371	6.7795		20I (Alpha, V1)	B.1.1.7	false	false	false	false	false	false	false	false	false
6040b371f7fbde3ec28b5b7f	DN0125_15020322	IIMK	ncov	Human	B.1.1.7	20I (Alpha, V1)	2021-02-15	Europe	Germany	Thuringia	Landkreis Saale-Orla-Kreis	Remptendorf	7368	50.5284	11.6598	189	20I (Alpha, V1)	B.1.1.7	false	false	false	false	false	false	false	false	false
IMS-10116-CVDP-24F5A4DF-3186-4463-A091-1872BB309A0B		RKI	ncov	Human	B.1.1.7	20I (Alpha, V1)	2021-05-04	Europe	Germany	Berlin	Landkreis Berlin; Stadt	Berlin	13407	52.5727	13.3512		20I (Alpha, V1)	B.1.1.7	false	false	false	false	false	false	false	false	false
IMS-10213-CVDP-83FCE7D2-4247-49C3-97BF-64E22D7C6961		RKI	ncov	Human	B.1.1.7	20I (Alpha, V1)	2021-03-22	Europe	Germany	Sachsen	Landkreis Chemnitz; Stadt	Chemnitz	9116	50.8213	12.884		20I (Alpha, V1)	B.1.1.7	true	false	false	false	false	false	false	false	false
IMS-10338-CVDP-9705A5F3-4FEE-4258-BD4B-65619CC0C68F		RKI	ncov	Human	B.1.1.7	20I (Alpha, V1)	2021-03-26	Europe	Germany	Rheinland-Pfalz	Landkreis Ludwigshafen am Rhein; kreisfreie Stadt	Ludwigshafen am Rhein	67063	49.499	8.4109		20I (Alpha, V1)	B.1.1.7	false	false	false	false	false	false	false	false	false
IMS-10150-CVDP-3FD106B6-D9EC-4AA2-BA35-639A5C462B5C		RKI	ncov	Human	B.1.1.7	20I (Alpha, V1)	2021-04-20	Europe	Germany	Nordrhein-Westfalen	Landkreis Leverkusen; Stadt	Leverkusen	51375	51.0331	7.052		20I (Alpha, V1)	B.1.1.7	false	false	false	false	false	false	false	false	false
IMS-10013-CVDP-ADC76B46-A666-4767-801A-B5CE7189F5DE		RKI	ncov	Human	B.1.1.7	20I (Alpha, V1)	2021-03-02	Europe	Germany	Saarland	Landkreis Saarpfalz-Kreis	Sankt Ingbert	66386	49.277	7.1167		20I (Alpha, V1)	B.1.1.7	false	false	false	false	false	false	false	false	false
IMS-10587-CVDP-6F589B4D-25D6-4179-A7F2-A884F76A591E		RKI	ncov	Human	B.1.1.7	20I (Alpha, V1)	2021-03-29	Europe	Germany	Hamburg	Landkreis Hamburg; Freie und Hansestadt	Hamburg	20095	53.5722	10.0031		20I (Alpha, V1)	B.1.1.7	false	false	false	false	false	false	false	false	false
IMS-10087-CVDP-053B5962-F014-4785-B111-8DA4BC577CDF		RKI	ncov	Human	B.1.1.7	20I (Alpha, V1)	2021-04-28	Europe	Germany	Nordrhein-Westfalen	Landkreis Köln; Stadt	Köln	50858	50.9243	6.8565		20I (Alpha, V1)	B.1.1.7	false	false	false	false	false	false	false	false	false
IMS-10020-CVDP-18150779-108A-47E4-9010-2E3C44976316		RKI	ncov	Human	B.1.1.7	20I (Alpha, V1)	2021-04-09	Europe	Germany	Bayern	Landkreis Weiden i.d.OPf.	Weiden	92637	49.6768	12.1561		20I (Alpha, V1)	B.1.1.7	false	false	false	false	false	false	false	false	false
IMS-10020-CVDP-82FB026E-1DAA-43D1-99E8-C604DF013153		RKI	ncov	Human	B.1.1.7	20I (Alpha, V1)	2021-04-18	Europe	Germany	Baden-Württemberg	Landkreis Esslingen	Leinfelden-Echterdingen	70771	48.6941	9.1681		20I (Alpha, V1)	B.1.1.7	false	false	false	false	false	false	false	false	false
IMS-10013-CVDP-354B1AF4-7255-4F49-88E1-7F2A6D98CF9D		RKI	ncov	Human	B.1.1.7	20I (Alpha, V1)	2021-03-04	Europe	Germany	Berlin	Landkreis Berlin; Stadt	Berlin	14197	52.4734	13.3118		20I (Alpha, V1)	B.1.1.7	false	false	false	false	false	false	false	false	false
6166ba5c81e18c1c41cedc05	1091299662	IIMK	ncov	Human	B.1.1.7	20I (Alpha, V1)	2021-03-17	Europe	Germany	Thuringia	Landkreis Ilm-Kreis	Arnstadt	99310	50.8343	10.9456	795	20I (Alpha, V1)	B.1.1.7	false	false	false	false	false	false	false	false	false
IMS-10020-CVDP-CFDB4D7D-40DD-4B92-A640-ADC3E15B1ED4		RKI	ncov	Human	B.1.1.7	20I (Alpha, V1)	2021-02-18	Europe	Germany	Baden-Württemberg	Landkreis Rhein-Neckar-Kreis	Eppelheim	69214	49.4019	8.6364		20I (Alpha, V1)	B.1.1.7	false	false	false	false	false	false	false	false	false
IMS-10261-CVDP-2B51A21F-0937-417C-8D5D-2798CA2F7B89		RKI	ncov	Human	B.1.1.7	20I (Alpha, V1)	2021-03-08	Europe	Germany	Nordrhein-Westfalen	Landkreis Lippe	Bad Salzuflen	32105	52.0808	8.7505		20I (Alpha, V1)	B.1.1.7	false	false	false	false	false	false	false	false	false
IMS-10116-CVDP-DE08D22E-11D8-491A-BFE1-57B4E8F76912		RKI	ncov	Human	B.1.1.7	20I (Alpha, V1)	2021-02-19	Europe	Germany	Baden-Württemberg	Landkreis Ludwigsburg	Ludwigsburg	71636	48.8901	9.1746		20I (Alpha, V1)	B.1.1.7	false	false	false	false	false	false	false	false	false
6166ba5c81e18c1c41cedf60	1091311071	IIMK	ncov	Human	B.1.1.7	20I (Alpha, V1)	2021-03-29	Europe	Germany	Thuringia	Landkreis Saalfeld-Rudolstadt	Rudolstadt	7407	50.7193	11.34	30	20I (Alpha, V1)	B.1.1.7	false	false	false	false	false	false	false	false	false
IMS-10267-CVDP-E39C4CBF-9F75-41DE-B0AA-BC804F53ABA9		RKI	ncov	Human	B.1.1.7	20I (Alpha, V1)	2021-04-14	Europe	Germany	Nordrhein-Westfalen	Landkreis Dortmund; Stadt	Dortmund	44137	51.5097	7.4601		20I (Alpha, V1)	B.1.1.7	false	false	false	false	false	false	false	false	false
IMS-10150-CVDP-8937161E-EFF7-439B-8C43-2B2856FAFF0D		RKI	ncov	Human	B.1.1.7	20I (Alpha, V1)	2021-05-06	Europe	Germany	Nordrhein-Westfalen	Landkreis Leverkusen; Stadt	Leverkusen	51375	51.0331	7.052		20I (Alpha, V1)	B.1.1.7	false	false	false	false	false	false	false	false	false
IMS-10013-CVDP-EF5632C2-E56B-411C-B329-73299BBF1130		RKI	ncov	Human	B.1.1.7	20I (Alpha, V1)	2021-03-26	Europe	Germany	Hamburg	Landkreis Hamburg; Freie und Hansestadt	Hamburg	21079	53.5722	10.0031		20I (Alpha, V1)	B.1.1.7	false	false	false	false	false	false	false	false	false
IMS-10150-CVDP-3C402985-D127-4078-A223-30D8D5C985FB		RKI	ncov	Human	B.1.1.7	20I (Alpha, V1)	2021-05-05	Europe	Germany	Rheinland-Pfalz	Landkreis Trier; kreisfreie Stadt	Trier	54290	49.7537	6.6393		20I (Alpha, V1)	B.1.1.7	false	false	false	false	false	false	false	false	false
IMS-10087-CVDP-E862C0CE-61E8-4855-BDB9-03EDA0D60540		RKI	ncov	Human	B.1.1.7	20I (Alpha, V1)	2021-03-25	Europe	Germany	Nordrhein-Westfalen	Landkreis Köln; Stadt	Köln	50858	50.9243	6.8565		20I (Alpha, V1)	B.1.1.7	false	false	false	false	false	false	false	false	false
IMS-10036-CVDP-896D052A-3B0E-41DB-A244-DBAB33998C48		RKI	ncov	Human	B.1.1.7	20I (Alpha, V1)	2021-02-24	Europe	Germany	Mecklenburg-Vorpommern	Kreisfreie Stadt Rostock	Rostock	18059	54.0679	12.1186		20I (Alpha, V1)	B.1.1.7	false	false	false	false	false	false	false	false	false
IMS-10013-CVDP-01274		RKI	ncov	Human	B.1.1.7	20I (Alpha, V1)	2021-01-28	Europe	Germany	Bayern	Bayreuth; Stadt	Bayreuth	95448	49.9474	11.5993		20I (Alpha, V1)	B.1.1.7	false	false	false	false	false	false	false	false	false
6166ba5c81e18c1c41cedc0f	1091300561	IIMK	ncov	Human	B.1.1.7	20I (Alpha, V1)	2021-03-18	Europe	Germany	Thuringia	Landkreis Eichsfeld	Worbis	37339	51.4188	10.3625	245	20I (Alpha, V1)	B.1.1.7	false	false	false	false	false	false	false	false	false
IMS-10020-CVDP-A2E78D4B-CA91-4D19-85D6-BE42E332F7AF		RKI	ncov	Human	B.1.1.7	20I (Alpha, V1)	2021-02-06	Europe	Germany	Bayern	Landkreis Weiden i.d.OPf.	Weiden	92637	49.6768	12.1561		20I (Alpha, V1)	B.1.1.7	false	false	false	false	false	false	false	false	false
IMS-10261-CVDP-C083C9CF-7B4F-467D-A43B-DE520866806B		RKI	ncov	Human	B.1.1.7	20I (Alpha, V1)	2021-04-14	Europe	Germany	Nordrhein-Westfalen	Landkreis Lippe	Bad Salzuflen	32105	52.0808	8.7505		20I (Alpha, V1)	B.1.1.7	false	false	false	false	false	false	false	false	false
IMS-10013-CVDP-51148DE5-9AA0-45D7-8BAD-32E1786E5D09		RKI	ncov	Human	B.1.1.7	20I (Alpha, V1)	2021-04-15	Europe	Germany	Sachsen	Landkreis Nordsachsen	Wermsdorf	4779	51.2833	12.95		20I (Alpha, V1)	B.1.1.7	false	false	false	false	false	false	false	false	false
IMS-10272-CVDP-47D4F44C-A14B-483C-8876-9B3462001FF6		RKI	ncov	Human	B.1.1.7	20I (Alpha, V1)	2021-02-10	Europe	Germany	Bayern	Landkreis München	Oberschleißheim	85764	48.25	11.5667		20I (Alpha, V1)	B.1.1.7	false	false	false	false	false	false	false	false	false
IMS-10375-CVDP-B0564126-19B4-4FEF-BB76-5BA5B89A1F3A		RKI	ncov	Human	B.1.1.7	20I (Alpha, V1)	2021-03-20	Europe	Germany	Baden-Württemberg	Landkreis Heidelberg	Heidelberg	69120	49.4169	8.6764		20I (Alpha, V1)	B.1.1.7	false	false	false	false	false	false	false	false	false
IMS-10186-CVDP-2DF6F7ED-6D33-42A3-9F95-FCE318247C16		RKI	ncov	Human	B.1.1.7	20I (Alpha, V1)	2021-04-09	Europe	Germany	Nordrhein-Westfalen	Landkreis Düsseldorf; Stadt	Düsseldorf	40210	51.2216	6.7897		20I (Alpha, V1)	B.1.1.7	false	false	false	false	false	false	false	false	false
IMS-10267-CVDP-F019A4F9-1210-4C41-B1B5-65F282A1975D		RKI	ncov	Human	B.1.1.7	20I (Alpha, V1)	2021-02-22	Europe	Germany	Nordrhein-Westfalen	Landkreis Dortmund; Stadt	Dortmund	44137	51.5097	7.4601		20I (Alpha, V1)	B.1.1.7	false	false	false	false	false	false	false	false	false
IMS-10087-CVDP-90515300-AFAC-4FE8-A0E5-F2C99EDA9636		RKI	ncov	Human	B.1.1.7	20I (Alpha, V1)	2021-05-03	Europe	Germany	Nordrhein-Westfalen	Landkreis Köln; Stadt	Köln	50858	50.9243	6.8565		20I (Alpha, V1)	B.1.1.7	false	false	false	false	false	false	false	false	false
IMS-10117-CVDP-EADBB425-B824-412C-B5D8-D90DA6F28538		RKI	ncov	Human	B.1.1.7	20I (Alpha, V1)	2021-03-25	Europe	Germany	Baden-Württemberg	Landkreis Rhein-Neckar-Kreis	Eppelheim	69214	49.4019	8.6364		20I (Alpha, V1)	B.1.1.7	false	false	false	false	false	false	false	false	false
IMS-10117-CVDP-BEC74444-8D39-4556-A7AE-4D5C854EEC15		RKI	ncov	Human	B.1.1.7	20I (Alpha, V1)	2021-04-06	Europe	Germany	Baden-Württemberg	Landkreis Rhein-Neckar-Kreis	Eppelheim	69214	49.4019	8.6364		20I (Alpha, V1)	B.1.1.7	false	false	false	false	false	false	false	false	false
IMS-10587-CVDP-6ED98874-84AD-45C8-A6A8-1C8420162035		RKI	ncov	Human	B.1.1.7	20I (Alpha, V1)	2021-02-12	Europe	Germany	Hamburg	Landkreis Hamburg; Freie und Hansestadt	Hamburg	20095	53.5722	10.0031		20I (Alpha, V1)	B.1.1.7	false	false	false	false	false	false	false	false	false
IMS-10013-CVDP-6833E619-8E17-43D9-ADE1-B921F349F5F0		RKI	ncov	Human	B.1.1.7	20I (Alpha, V1)	2021-03-04	Europe	Germany	Sachsen	Landkreis Nordsachsen	Wermsdorf	4779	51.2833	12.95		20I (Alpha, V1)	B.1.1.7	false	false	false	false	false	false	false	false	false
IMS-10218-CVDP-377F5474-7E5F-4E2D-B3F6-0B94770F06C8		RKI	ncov	Human	B.1.1.7	20I (Alpha, V1)	2021-03-19	Europe	Germany	Sachsen-Anhalt	Landkreis Landeshauptstadt Magdeburg	Magdeburg	39104	52.1243	11.6322		20I (Alpha, V1)	B.1.1.7	false	false	false	false	false	false	false	false	false
IMS-10117-CVDP-758C8BC5-CE58-41D0-B1D7-026FBE78032F		RKI	ncov	Human	B.1.1.7	20I (Alpha, V1)	2021-03-17	Europe	Germany	Nordrhein-Westfalen	Landkreis Leverkusen; Stadt	Leverkusen	51375	51.0331	7.052		20I (Alpha, V1)	B.1.1.7	false	false	false	false	false	false	false	false	false
IMS-10013-CVDP-6C01EE19-D91D-43CA-BFA4-B783DB99BD19		RKI	ncov	Human	B.1.1.7	20I (Alpha, V1)	2021-02-12	Europe	Germany	Sachsen	Landkreis Nordsachsen	Wermsdorf	4779	51.2833	12.95		20I (Alpha, V1)	B.1.1.7	false	false	false	false	false	false	false	false	false
IMS-10294-CVDP-E00C133A-68C2-494A-9FDA-900C1037869E		RKI	ncov	Human	B.1.1.7	20I (Alpha, V1)	2021-05-06	Europe	Germany	Nordrhein-Westfalen	Landkreis Düsseldorf; Stadt	Düsseldorf	40477	51.2371	6.7795		20I (Alpha, V1)	B.1.1.7	false	false	false	false	false	false	false	false	false
IMS-10117-CVDP-E272054F-864B-46AF-BB7A-F89F5ACFDE0A		RKI	ncov	Human	B.1.1.7	20I (Alpha, V1)	2021-03-23	Europe	Germany	Nordrhein-Westfalen	Landkreis Leverkusen; Stadt	Leverkusen	51375	51.0331	7.052		20I (Alpha, V1)	B.1.1.7	false	false	false	false	false	false	false	false	false
IMS-10150-CVDP-2DB28515-CCBB-494D-85F6-9C72B5C84A09		RKI	ncov	Human	B.1.1.7	20I (Alpha, V1)	2021-04-30	Europe	Germany	Rheinland-Pfalz	Landkreis Trier; kreisfreie Stadt	Trier	54290	49.7537	6.6393		20I (Alpha, V1)	B.1.1.7	false	false	false	false	false	false	false	false	false
IMS-10020-CVDP-E743674C-E675-4F8E-AFD8-A61E2F38703F		RKI	ncov	Human	B.1.1.7	20I (Alpha, V1)	2021-02-10	Europe	Germany	Bayern	Landkreis Weiden i.d.OPf.	Weiden	92637	49.6768	12.1561		20I (Alpha, V1)	B.1.1.7	false	false	false	false	false	false	false	false	false
IMS-10122-CVDP-65CB35CF-42D0-4DC6-B087-535D5D744EF1		RKI	ncov	Human	B.1.1.7	20I (Alpha, V1)	2021-04-20	Europe	Germany	Baden-Württemberg	Landkreis Karlsruhe	Karlsruhe	76131	49.0078	8.4199		20I (Alpha, V1)	B.1.1.7	false	false	false	false	false	false	false	false	false
IMS-10197-CVDP-91092FE1-B09A-42D6-9473-2FDD9A90E18C		RKI	ncov	Human	B.1.1.7	20I (Alpha, V1)	2021-04-20	Europe	Germany	Sachsen-Anhalt	Landkreis Landeshauptstadt Magdeburg	Magdeburg	39124	52.1638	11.6333		20I (Alpha, V1)	B.1.1.7	false	false	false	false	false	false	false	false	false
6166ba5b81e18c1c41ced05a	1027790038	IIMK	ncov	Human	B.1.1.7	20I (Alpha, V1)	2021-04-12	Europe	Germany	Thuringia	Landkreis Jena; Stadt	Jena	7743	50.9283	11.5853	0	20I (Alpha, V1)	B.1.1.7	false	false	false	false	false	false	false	false	false
IMS-10267-CVDP-C9EEDE7E-ECD9-495F-8C96-14745E80E385		RKI	ncov	Human	B.1.1.7	20I (Alpha, V1)	2021-02-22	Europe	Germany	Nordrhein-Westfalen	Landkreis Dortmund; Stadt	Dortmund	44137	51.5097	7.4601		20I (Alpha, V1)	B.1.1.7	false	false	false	false	false	false	false	false	false
6166b85c81e18c1c41cec61c	IMS-10013-CVDP-9d899aad-a699-4325-b4b0-d660d1a996a7	IIMK	ncov	Human	B.1.1.7	20I (Alpha, V1)	2021-03-15	Europe	Germany	Thuringia	Landkreis Jena; Stadt	Jena	7751	50.9283	11.5853	32	20I (Alpha, V1)	B.1.1.7	false	false	false	false	false	false	false	false	false
IMS-10375-CVDP-F8959F9F-3EE5-4340-8338-4E1F7893812E		RKI	ncov	Human	B.1.1.7	20I (Alpha, V1)	2021-04-21	Europe	Germany	Baden-Württemberg	Landkreis Heidelberg	Heidelberg	69120	49.4169	8.6764		20I (Alpha, V1)	B.1.1.7	false	false	false	false	false	false	false	false	false
IMS-10013-CVDP-DEA8B87F-8638-450C-B528-F49B64BD35AD		RKI	ncov	Human	B.1.1.7	20I (Alpha, V1)	2021-02-18	Europe	Germany	Berlin	Landkreis Berlin; Stadt	Berlin	14197	52.4734	13.3118		20I (Alpha, V1)	B.1.1.7	false	false	false	false	false	false	false	false	false
IMS-10013-CVDP-76C2A840-F817-4209-9F9D-BAC8CD6D3969		RKI	ncov	Human	B.1.1.7	20I (Alpha, V1)	2021-02-26	Europe	Germany	Sachsen	Landkreis Nordsachsen	Wermsdorf	4779	51.2833	12.95		20I (Alpha, V1)	B.1.1.7	false	false	false	false	false	false	false	false	false
IMS-10318-CVDP-C531DCA2-3821-4B17-9570-6CF84AE084DD		RKI	ncov	Human	B.1.1.7	20I (Alpha, V1)	2021-03-10	Europe	Germany	Berlin	Landkreis Berlin; Stadt	Berlin	10627	52.508	13.303		20I (Alpha, V1)	B.1.1.7	false	false	false	false	false	false	false	false	false
IMS-10004-CVDP-818CA407-6D25-4619-B0A9-C3EBB6B97B50		RKI	ncov	Human	B.1.1.7	20I (Alpha, V1)	2021-03-02	Europe	Germany	Schleswig-Holstein	Kreis Herzogtum Lauenburg	Kreis Herzogtum Lauenburg	21502	53.5966	10.5762		20I (Alpha, V1)	B.1.1.7	false	false	false	false	false	false	false	false	false
IMS-10150-CVDP-5D518F09-D286-4BA6-9247-0B4766FF9044		RKI	ncov	Human	B.1.1.7	20I (Alpha, V1)	2021-04-20	Europe	Germany	Rheinland-Pfalz	Landkreis Trier; kreisfreie Stadt	Trier	54290	49.7537	6.6393		20I (Alpha, V1)	B.1.1.7	false	false	false	false	false	false	false	false	false
IMS-10013-CVDP-272FDDB4-25BB-4B9A-919A-2D07013C1946		RKI	ncov	Human	B.1.1.7	20I (Alpha, V1)	2021-03-09	Europe	Germany	Niedersachsen	Landkreis Region Hannover	Hannover	30163	52.3943	9.7475		20I (Alpha, V1)	B.1.1.7	false	false	false	false	false	false	false	false	false
IMS-10122-CVDP-4829CA38-6A17-4AA5-BFCF-D0165A95A120		RKI	ncov	Human	B.1.1.7	20I (Alpha, V1)	2021-02-11	Europe	Germany	Sachsen	Kreisfreie Stadt Leipzig	Leipzig	4289	51.3667	12.3833		20I (Alpha, V1)	B.1.1.7	false	false	false	false	false	false	false	false	false
6166ba5c81e18c1c41ced7bd	1028310779	IIMK	ncov	Human	B.1.1.7	20I (Alpha, V1)	2021-02-17	Europe	Germany	Thuringia	Landkreis Ilm-Kreis	Arnstadt	99310	50.8343	10.9456	79	20I (Alpha, V1)	B.1.1.7	false	false	false	false	false	false	false	false	true
IMS-10020-CVDP-4368CF88-68DC-4501-BF88-BC7D991F92D5		RKI	ncov	Human	B.1.1.7	20I (Alpha, V1)	2021-04-03	Europe	Germany	Baden-Württemberg	Landkreis Esslingen	Leinfelden-Echterdingen	70771	48.6941	9.1681		20I (Alpha, V1)	B.1.1.7	false	false	false	false	false	false	false	false	false
IMS-10383-CVDP-00008		RKI	ncov	Human	B.1.1.7	20I (Alpha, V1)	2021-01-29	Europe	Germany	Bayern	Regensburg; Stadt	Regensburg	93053	48.9965	12.1202		20I (Alpha, V1)	B.1.1.7	false	false	false	false	false	false	false	false	false
IMS-10030-CVDP-B72EAB99-9AC4-4DD7-B16F-2693DFB38D01		RKI	ncov	Human	B.1.1.7	20I (Alpha, V1)	2021-02-22	Europe	Germany	Berlin	Landkreis Berlin; Stadt	Berlin	13347	52.5491	13.3655		20I (Alpha, V1)	B.1.1.7	false	false	false	false	false	false	false	false	false
IMS-10020-CVDP-5CC215A9-5B08-4228-8CFC-82F1947536E6		RKI	ncov	Human	B.1.1.7	20I (Alpha, V1)	2021-03-11	Europe	Germany	Baden-Württemberg	Landkreis Esslingen	Leinfelden-Echterdingen	70771	48.6941	9.1681		20I (Alpha, V1)	B.1.1.7	false	false	false	false	false	false	false	false	false
IMS-10150-CVDP-9249EE0F-6819-433B-9859-265756A1F857		RKI	ncov	Human	B.1.1.7	20I (Alpha, V1)	2021-04-30	Europe	Germany	Nordrhein-Westfalen	Landkreis Leverkusen; Stadt	Leverkusen	51375	51.0331	7.052		20I (Alpha, V1)	B.1.1.7	false	false	false	false	false	false	false	false	false
IMS-10020-CVDP-21484C52-5E41-4513-B966-69CED5E1248A		RKI	ncov	Human	B.1.1.7	20I (Alpha, V1)	2021-03-07	Europe	Germany	Baden-Württemberg	Landkreis Esslingen	Leinfelden-Echterdingen	70771	48.6941	9.1681		20I (Alpha, V1)	B.1.1.7	false	false	false	false	false	false	false	false	false
IMS-10020-CVDP-32E82E34-C2EF-419B-8AE9-A6224591B654		RKI	ncov	Human	B.1.1.7	20I (Alpha, V1)	2021-03-23	Europe	Germany	Rheinland-Pfalz	Landkreis Trier; kreisfreie Stadt	Trier	54290	49.7537	6.6393		20I (Alpha, V1)	B.1.1.7	false	false	false	false	false	false	false	false	false
IMS-10218-CVDP-00235		RKI	ncov	Human	B.1.1.7	20I (Alpha, V1)	2021-01-28	Europe	Germany	Sachsen-Anhalt	Landkreis Landeshauptstadt Magdeburg	Magdeburg	39120	52.0816	11.6212		20I (Alpha, V1)	B.1.1.7	false	false	false	false	false	false	false	false	false
IMS-10338-CVDP-4A86314B-AD54-463C-85C4-76AB137D5828		RKI	ncov	Human	B.1.1.7	20I (Alpha, V1)	2021-03-27	Europe	Germany	Hessen	Landkreis Frankfurt am Main; Stadt	Frankfurt am Main	60327	50.1038	8.6522		20I (Alpha, V1)	B.1.1.7	false	false	false	false	false	false	false	false	false
IMS-10587-CVDP-E2C7A7B1-9468-43C7-8F82-EF725F3F1FEE		RKI	ncov	Human	B.1.1.7	20I (Alpha, V1)	2021-02-15	Europe	Germany	Hamburg	Landkreis Hamburg; Freie und Hansestadt	Hamburg	20095	53.5722	10.0031		20I (Alpha, V1)	B.1.1.7	false	false	false	false	false	false	false	false	false
IMS-10020-CVDP-BF138C00-AF22-41DD-84A0-89E87451DD11		RKI	ncov	Human	B.1.1.7	20I (Alpha, V1)	2021-02-12	Europe	Germany	Bayern	Landkreis Weiden i.d.OPf.	Weiden	92637	49.6768	12.1561		20I (Alpha, V1)	B.1.1.7	false	false	false	false	false	false	false	false	false
IMS-10261-CVDP-4B3AE81B-0310-4090-8F12-E00A0A960362		RKI	ncov	Human	B.1.1.7	20I (Alpha, V1)	2021-03-15	Europe	Germany	Nordrhein-Westfalen	Landkreis Lippe	Bad Salzuflen	32105	52.0808	8.7505		20I (Alpha, V1)	B.1.1.7	false	false	false	false	false	false	false	false	false
IMS-10020-CVDP-A25A6FCF-EBEB-4F91-99A1-92BE5A514000		RKI	ncov	Human	B.1.1.7	20I (Alpha, V1)	2021-02-11	Europe	Germany	Bayern	Landkreis Weiden i.d.OPf.	Weiden	92637	49.6768	12.1561		20I (Alpha, V1)	B.1.1.7	false	false	false	false	false	false	false	false	false
IMS-10116-CVDP-C4C7393C-F7EF-4339-B40C-9E70CABEE76D		RKI	ncov	Human	B.1.1.7	20I (Alpha, V1)	2021-02-10	Europe	Germany	Berlin	Landkreis Berlin; Stadt	Berlin	13407	52.5727	13.3512		20I (Alpha, V1)	B.1.1.7	false	false	false	false	false	false	false	false	false
IMS-10061-CVDP-B5A5A042-2CF1-471E-8CDA-8F67F84B2A25		RKI	ncov	Human	B.1.1.7	20I (Alpha, V1)	2021-04-19	Europe	Germany	Niedersachsen	Landkreis Göttingen	Göttingen	37077	51.5604	9.9319		20I (Alpha, V1)	B.1.1.7	false	false	false	false	false	false	false	false	false
IMS-10020-CVDP-98269492-8629-4DB4-B68A-DB4B00A25D4E		RKI	ncov	Human	B.1.1.7	20I (Alpha, V1)	2021-03-25	Europe	Germany	Baden-Württemberg	Landkreis Esslingen	Leinfelden-Echterdingen	70771	48.6941	9.1681		20I (Alpha, V1)	B.1.1.7	false	false	false	false	false	false	false	false	false
IMS-10150-CVDP-564E03D4-A1B6-4352-938C-FF5EC00ACD7D		RKI	ncov	Human	B.1.1.7	20I (Alpha, V1)	2021-05-06	Europe	Germany	Nordrhein-Westfalen	Landkreis Leverkusen; Stadt	Leverkusen	51375	51.0331	7.052		20I (Alpha, V1)	B.1.1.7	false	false	false	false	false	false	false	false	false
IMS-10020-CVDP-121B10DB-8904-4FEC-A067-F841AA93CD11		RKI	ncov	Human	B.1.1.7	20I (Alpha, V1)	2021-04-12	Europe	Germany	Baden-Württemberg	Landkreis Esslingen	Leinfelden-Echterdingen	70771	48.6941	9.1681		20I (Alpha, V1)	B.1.1.7	false	false	false	false	false	false	false	false	false
IMS-10116-CVDP-CEA5D67A-AD39-4871-A246-C9022816C725		RKI	ncov	Human	B.1.1.7	20I (Alpha, V1)	2021-03-28	Europe	Germany	Berlin	Landkreis Berlin; Stadt	Berlin	13407	52.5727	13.3512		20I (Alpha, V1)	B.1.1.7	false	false	false	false	false	false	false	false	false
IMS-10036-CVDP-D87B9AF6-6E23-4363-952F-800E9F8F482D		RKI	ncov	Human	B.1.1.7	20I (Alpha, V1)	2021-04-03	Europe	Germany	Mecklenburg-Vorpommern	Landkreis Vorpommern-Greifswald	Greifswald	17493	54.0902	13.4464		20I (Alpha, V1)	B.1.1.7	false	false	false	false	false	false	false	false	false
IMS-10117-CVDP-55555530-F6FC-48B9-8A0F-40CD2A516B24		RKI	ncov	Human	B.1.1.7	20I (Alpha, V1)	2021-03-25	Europe	Germany	Nordrhein-Westfalen	Landkreis Bonn; Stadt	Bonn	53115	50.7272	7.0851		20I (Alpha, V1)	B.1.1.7	false	false	false	false	false	false	false	false	false
IMS-10209-CVDP-8B8B4606-84A7-48D5-AE90-DDCA3EDE8E97		RKI	ncov	Human	B.1.1.7	20I (Alpha, V1)	2021-04-12	Europe	Germany	Baden-Württemberg	Landkreis Konstanz	Konstanz	78467	47.6744	9.1649		20I (Alpha, V1)	B.1.1.7	false	false	false	false	false	false	false	false	false
IMS-10122-CVDP-F90788C7-9A99-46AA-9B74-02CE1C6441F9		RKI	ncov	Human	B.1.1.7	20I (Alpha, V1)	2021-04-03	Europe	Germany	Baden-Württemberg	Landkreis Ravensburg	Ravensburg	88212	47.7815	9.6183		20I (Alpha, V1)	B.1.1.7	false	false	false	false	false	false	false	false	false
IMS-10013-CVDP-78845895-62F5-423F-AA53-BDC5E4800730		RKI	ncov	Human	B.1.1.7	20I (Alpha, V1)	2021-04-21	Europe	Germany	Sachsen	Landkreis Nordsachsen	Wermsdorf	4779	51.2833	12.95		20I (Alpha, V1)	B.1.1.7	false	false	false	false	false	false	false	false	false
6166ba5b81e18c1c41cecbb5	1091357190	IIMK	ncov	Human	B.1.1.7	20I (Alpha, V1)	2021-05-17	Europe	Germany	Thuringia	Landkreis Unstrut-Hainich-Kreis	Mühlhausen	99961	51.2088	10.459	465	20I (Alpha, V1)	B.1.1.7	false	false	false	false	false	false	false	false	false
IMS-10020-CVDP-9CFC9A8D-900A-4631-9E37-BD423C38B700		RKI	ncov	Human	B.1.1.7	20I (Alpha, V1)	2021-03-30	Europe	Germany	Baden-Württemberg	Landkreis Esslingen	Leinfelden-Echterdingen	70771	48.6941	9.1681		20I (Alpha, V1)	B.1.1.7	false	false	false	false	false	false	false	false	false
IMS-10020-CVDP-12FF758C-2E7D-4CBC-8DEC-2EC2B1BF93D8		RKI	ncov	Human	B.1.1.7	20I (Alpha, V1)	2021-02-18	Europe	Germany	Bayern	Landkreis Weiden i.d.OPf.	Weiden	92637	49.6768	12.1561		20I (Alpha, V1)	B.1.1.7	false	false	false	false	false	false	false	false	false
IMS-10117-CVDP-39AC085B-7AEE-406E-8CE2-B82414C6D7A3		RKI	ncov	Human	B.1.1.7	20I (Alpha, V1)	2021-03-25	Europe	Germany	Nordrhein-Westfalen	Landkreis Leverkusen; Stadt	Leverkusen	51375	51.0331	7.052		20I (Alpha, V1)	B.1.1.7	false	false	false	false	false	false	false	false	false
IMS-10272-CVDP-00015		RKI	ncov	Human	B.1.1.7	20I (Alpha, V1)	2021-01-18	Europe	Germany	Bayern	Landkreis München	Oberschleißheim	85764	48.25	11.5667		20I (Alpha, V1)	B.1.1.7	false	false	false	false	false	false	false	false	false
IMS-10020-CVDP-DEC21E28-F23F-49B0-BABE-F20972345BF1		RKI	ncov	Human	B.1.1.7	20I (Alpha, V1)	2021-03-09	Europe	Germany	Baden-Württemberg	Landkreis Esslingen	Leinfelden-Echterdingen	70771	48.6941	9.1681		20I (Alpha, V1)	B.1.1.7	false	false	false	false	false	false	false	false	false
6166ba5b81e18c1c41ced230	1025082886	IIMK	ncov	Human	B.1.1.7	20I (Alpha, V1)	2021-04-16	Europe	Germany	Thuringia	Landkreis Jena; Stadt	Jena	7751	50.9283	11.5853	221	20I (Alpha, V1)	B.1.1.7	false	false	false	false	false	false	false	false	false
IMS-10004-CVDP-73FBE714-0CE4-41AB-A2E8-9C838B2AC11F		RKI	ncov	Human	B.1.1.7	20I (Alpha, V1)	2021-03-26	Europe	Germany	Schleswig-Holstein	Kreis Herzogtum Lauenburg	Kreis Herzogtum Lauenburg	21502	53.5966	10.5762		20I (Alpha, V1)	B.1.1.7	false	false	false	false	false	false	false	false	false
IMS-10020-CVDP-15433FAA-28BD-455B-823B-4E2227B0C82A		RKI	ncov	Human	B.1.1.7	20I (Alpha, V1)	2021-03-27	Europe	Germany	Rheinland-Pfalz	Landkreis Trier; kreisfreie Stadt	Trier	54290	49.7537	6.6393		20I (Alpha, V1)	B.1.1.7	false	false	false	false	false	false	false	false	false
IMS-10087-CVDP-5434916F-7F09-4189-8225-7D670772718C		RKI	ncov	Human	B.1.1.7	20I (Alpha, V1)	2021-03-08	Europe	Germany	Nordrhein-Westfalen	Landkreis Köln; Stadt	Köln	50858	50.9243	6.8565		20I (Alpha, V1)	B.1.1.7	false	false	false	false	false	false	false	false	false
IMS-10013-CVDP-0EAEB14C-B190-41D5-B32D-0AE95D25C1B9		RKI	ncov	Human	B.1.1.7	20I (Alpha, V1)	2021-02-26	Europe	Germany	Hamburg	Landkreis Hamburg; Freie und Hansestadt	Hamburg	21079	53.5722	10.0031		20I (Alpha, V1)	B.1.1.7	false	false	false	false	false	false	false	false	false
IMS-10375-CVDP-2ED31C83-9662-4588-A2E6-60388573B7F9		RKI	ncov	Human	B.1.1.7	20I (Alpha, V1)	2021-03-12	Europe	Germany	Baden-Württemberg	Landkreis Mannheim	Mannheim	68167	49.4996	8.4939		20I (Alpha, V1)	B.1.1.7	false	false	false	false	false	false	false	false	false
IMS-10294-CVDP-BBB74B39-7C13-4F62-AAC8-EE35FD966B0B		RKI	ncov	Human	B.1.1.7	20I (Alpha, V1)	2021-03-04	Europe	Germany	Nordrhein-Westfalen	Landkreis Düsseldorf; Stadt	Düsseldorf	40477	51.2371	6.7795		20I (Alpha, V1)	B.1.1.7	false	false	false	false	false	false	false	false	false
IMS-10020-CVDP-5EB1CA0E-EBCA-4CEF-AFD7-38E0D1AA8D35		RKI	ncov	Human	B.1.1.7	20I (Alpha, V1)	2021-02-11	Europe	Germany	Bayern	Landkreis Weiden i.d.OPf.	Weiden	92637	49.6768	12.1561		20I (Alpha, V1)	B.1.1.7	false	false	false	false	false	false	false	false	false
IMS-10004-CVDP-B6DCF191-6B6A-4C3B-B0E3-E932D4298A93		RKI	ncov	Human	B.1.1.7	20I (Alpha, V1)	2021-03-17	Europe	Germany	Schleswig-Holstein	Kreis Herzogtum Lauenburg	Kreis Herzogtum Lauenburg	21502	53.5966	10.5762		20I (Alpha, V1)	B.1.1.7	false	false	false	false	false	false	false	false	false
IMS-10020-CVDP-FDC9DE95-46A0-4303-AA0D-AB1C9208C0F5		RKI	ncov	Human	B.1.1.7	20I (Alpha, V1)	2021-02-11	Europe	Germany	Baden-Württemberg	Landkreis Esslingen	Leinfelden-Echterdingen	70771	48.6941	9.1681		20I (Alpha, V1)	B.1.1.7	false	false	false	false	false	false	false	false	false
IMS-10004-CVDP-A52ADE7B-3B6A-4271-9344-3DA0F4506CBB		RKI	ncov	Human	B.1.1.7	20I (Alpha, V1)	2021-03-17	Europe	Germany	Schleswig-Holstein	Kreis Herzogtum Lauenburg	Kreis Herzogtum Lauenburg	21502	53.5966	10.5762		20I (Alpha, V1)	B.1.1.7	false	false	false	false	false	false	false	false	false
61792019ba758861d782eedd	DN00665_28050829	IIMK	ncov	Human	B.1.1.7	20I (Alpha, V1)	2021-05-27	Europe	Germany	Thuringia	Landkreis Sonneberg	Sonneberg	96515	50.3555	11.169	189	20I (Alpha, V1)	Q.7	false	false	false	false	false	false	false	false	false
6166ba5c81e18c1c41cedce3	1002047260	IIMK	ncov	Human	B.1.1.7	20I (Alpha, V1)	2021-03-22	Europe	Germany	Thuringia	Landkreis Greiz	Zeulenroda-Triebes	7937	50.6489	11.9803	28	20I (Alpha, V1)	B.1.1.7	false	false	false	false	false	false	false	false	false
IMS-10117-CVDP-1D0EB466-9B9F-4B8B-B5BE-DFAEEE40B5E3		RKI	ncov	Human	B.1.1.7	20I (Alpha, V1)	2021-03-03	Europe	Germany	Baden-Württemberg	Landkreis Karlsruhe	Ettlingen	76275	48.9409	8.4076		20I (Alpha, V1)	B.1.1.7	false	false	false	false	false	false	false	false	false
6166ba5b81e18c1c41cecdd2	1050192427	IIMK	ncov	Human	B.1.1.7	20I (Alpha, V1)	2021-04-01	Europe	Germany	Thuringia	Landkreis Gera	Gera	7548	50.8753	12.0788	243	20I (Alpha, V1)	B.1.1.7	false	false	false	false	false	false	false	true	false
IMS-10013-CVDP-1314D93B-D300-4C96-B372-9261C5734448		RKI	ncov	Human	B.1.1.7	20I (Alpha, V1)	2021-03-23	Europe	Germany	Bremen	Kreisfreie Stadt Bremen	Bremen	28357	53.1178	8.8947		20I (Alpha, V1)	B.1.1.7	false	false	false	false	false	false	false	false	false
IMS-10261-CVDP-B23F4E70-D83C-481C-B7AB-2FE82537AD8C		RKI	ncov	Human	B.1.1.7	20I (Alpha, V1)	2021-03-27	Europe	Germany	Nordrhein-Westfalen	Landkreis Lippe	Bad Salzuflen	32105	52.0808	8.7505		20I (Alpha, V1)	B.1.1.7	false	false	false	false	false	false	false	false	false
IMS-10004-CVDP-A814D83C-8A2C-4B81-AB8C-949096A0506D		RKI	ncov	Human	B.1.1.7	20I (Alpha, V1)	2021-04-27	Europe	Germany	Schleswig-Holstein	Kreis Herzogtum Lauenburg	Kreis Herzogtum Lauenburg	21502	53.5966	10.5762		20I (Alpha, V1)	B.1.1.7	false	false	false	false	false	false	false	false	false
IMS-10117-CVDP-38B80B68-FF9E-4EB2-843C-F9C9D771FC03		RKI	ncov	Human	B.1.1.7	20I (Alpha, V1)	2021-04-06	Europe	Germany	Baden-Württemberg	Landkreis Rhein-Neckar-Kreis	Eppelheim	69214	49.4019	8.6364		20I (Alpha, V1)	Q.7	false	false	false	false	false	false	false	false	false
IMS-10023-CVDP-51CBCD21-66A3-4264-A9F4-B3ECD8BC14DB		RKI	ncov	Human	B.1.1.7	20I (Alpha, V1)	2021-03-02	Europe	Germany	Sachsen	Landkreis Erzgebirgskreis	Neukirchen/Erzgebirge	9221	50.7835	12.87		20I (Alpha, V1)	B.1.1.7	false	false	false	false	false	false	false	false	false
IMS-10013-CVDP-B38339EC-5DBB-4075-BE1D-F9ED51297252		RKI	ncov	Human	B.1.1.7	20I (Alpha, V1)	2021-03-02	Europe	Germany	Sachsen	Landkreis Nordsachsen	Wermsdorf	4779	51.2833	12.95		20I (Alpha, V1)	B.1.1.7	false	false	false	false	false	false	false	false	false
IMS-10116-CVDP-05674452-09CB-4006-B26C-4676B68B04C1		RKI	ncov	Human	B.1.1.7	20I (Alpha, V1)	2021-03-26	Europe	Germany	Berlin	Landkreis Berlin; Stadt	Berlin	13407	52.5727	13.3512		20I (Alpha, V1)	B.1.1.7	false	false	false	false	false	false	false	false	false
IMS-10013-CVDP-70B0994C-D399-41C6-B378-9EE75DA45CCE		RKI	ncov	Human	B.1.1.7	20I (Alpha, V1)	2021-02-19	Europe	Germany	Bayern	Bayreuth; Stadt	Bayreuth	95448	49.9474	11.5993		20I (Alpha, V1)	B.1.1.7	false	false	false	false	false	false	false	false	false
IMS-10020-CVDP-BFEB1468-9000-4702-A423-8AC8C0D3B8F9		RKI	ncov	Human	B.1.1.7	20I (Alpha, V1)	2021-04-02	Europe	Germany	Baden-Württemberg	Landkreis Esslingen	Leinfelden-Echterdingen	70771	48.6941	9.1681		20I (Alpha, V1)	B.1.1.7	false	false	false	false	false	false	false	false	false
IMS-10186-CVDP-2DBD24D5-B043-4A45-B54A-784F3EFE9A2B		RKI	ncov	Human	B.1.1.7	20I (Alpha, V1)	2021-03-10	Europe	Germany	Nordrhein-Westfalen	Landkreis Düsseldorf; Stadt	Düsseldorf	40210	51.2216	6.7897		20I (Alpha, V1)	B.1.1.7	false	false	false	false	false	false	false	false	false
IMS-10020-CVDP-90C37B95-6648-4135-A127-53192ED0D2CF		RKI	ncov	Human	B.1.1.7	20I (Alpha, V1)	2021-02-19	Europe	Germany	Bayern	Landkreis Weiden i.d.OPf.	Weiden	92637	49.6768	12.1561		20I (Alpha, V1)	B.1.1.7	false	false	false	false	false	false	false	false	false
IMS-10004-CVDP-89C5524D-4393-4C8E-96AE-05F629ADDFF7		RKI	ncov	Human	B.1.1.7	20I (Alpha, V1)	2021-04-06	Europe	Germany	Schleswig-Holstein	Kreis Herzogtum Lauenburg	Kreis Herzogtum Lauenburg	21502	53.5966	10.5762		20I (Alpha, V1)	B.1.1.7	false	false	false	false	false	false	false	false	false
IMS-10122-CVDP-55918C3D-12EC-48BE-8E11-D082C5F6C50A		RKI	ncov	Human	B.1.1.7	20I (Alpha, V1)	2021-03-08	Europe	Germany	Baden-Württemberg	Landkreis Karlsruhe	Karlsruhe	76131	49.0078	8.4199		20I (Alpha, V1)	B.1.1.7	false	false	false	false	false	false	false	false	false
IMS-10116-CVDP-BC67AAAF-2DBB-4002-8F5A-9AE8F16A5E1B		RKI	ncov	Human	B.1.1.7	20I (Alpha, V1)	2021-02-13	Europe	Germany	Sachsen	Kreisfreie Stadt Leipzig	Leipzig	4289	51.3667	12.3833		20I (Alpha, V1)	B.1.1.7	false	false	false	false	false	false	false	false	false
IMS-10013-CVDP-A1063AF1-888E-4F4E-AD4B-333F62543766		RKI	ncov	Human	B.1.1.7	20I (Alpha, V1)	2021-03-24	Europe	Germany	Bremen	Kreisfreie Stadt Bremen	Bremen	28357	53.1178	8.8947		20I (Alpha, V1)	B.1.1.7	false	false	false	false	false	false	false	false	false
IMS-10117-CVDP-43F450E5-7B43-4B96-9742-305E48805D1C		RKI	ncov	Human	B.1.1.7	20I (Alpha, V1)	2021-03-22	Europe	Germany	Baden-Württemberg	Landkreis Karlsruhe	Ettlingen	76275	48.9409	8.4076		20I (Alpha, V1)	B.1.1.7	false	false	false	false	false	false	false	false	false
6166ba5b81e18c1c41cecd77	1050192354	IIMK	ncov	Human	B.1.1.7	20I (Alpha, V1)	2021-04-01	Europe	Germany	Thuringia	Landkreis Greiz	Zeulenroda-Triebes	7937	50.6489	11.9803	341	20I (Alpha, V1)	B.1.1.7	false	false	false	false	false	false	false	false	false
IMS-10294-CVDP-17EC7B4D-CA9D-4FD1-82BC-7B61DB2AB413		RKI	ncov	Human	B.1.1.7	20I (Alpha, V1)	2021-02-19	Europe	Germany	Nordrhein-Westfalen	Landkreis Düsseldorf; Stadt	Düsseldorf	40210	51.2216	6.7897		20I (Alpha, V1)	B.1.1.7	false	false	false	false	false	false	false	false	false
IMS-10150-CVDP-7FC921DE-0DF8-4291-A3EC-834EE5A1CB18		RKI	ncov	Human	B.1.1.7	20I (Alpha, V1)	2021-04-23	Europe	Germany	Nordrhein-Westfalen	Landkreis Leverkusen; Stadt	Leverkusen	51375	51.0331	7.052		20I (Alpha, V1)	B.1.1.7	false	false	false	false	false	false	false	false	false
6166ba5b81e18c1c41cecb08	1091348928	IIMK	ncov	Human	B.1.1.7	20I (Alpha, V1)	2021-05-07	Europe	Germany	Thuringia	Landkreis Weimarer Land	Bad Berka	99438	50.8998	11.2825	0	20I (Alpha, V1)	B.1.1.7	false	false	false	false	false	false	false	false	false
IMS-10565-CVDP-62F44B5F-613F-448C-9217-F8FB42A5095F		RKI	ncov	Human	B.1.1.7	20I (Alpha, V1)	2021-03-28	Europe	Germany	Hamburg	Landkreis Hamburg; Freie und Hansestadt	Hamburg	20095	53.5722	10.0031		20I (Alpha, V1)	B.1.1.7	false	false	false	false	false	false	false	false	false
6166ba5b81e18c1c41ced23e	1028313013	IIMK	ncov	Human	B.1.1.7	20I (Alpha, V1)	2021-04-17	Europe	Germany	Thuringia	Landkreis Ilm-Kreis	Arnstadt	99310	50.8343	10.9456	7	20I (Alpha, V1)	B.1.1.7	false	false	false	false	false	false	false	false	false
IMS-10087-CVDP-6E29F750-2ACB-4386-AD46-6EAA3F752782		RKI	ncov	Human	B.1.1.7	20I (Alpha, V1)	2021-03-30	Europe	Germany	Nordrhein-Westfalen	Landkreis Köln; Stadt	Köln	50858	50.9243	6.8565		20I (Alpha, V1)	B.1.1.7	false	false	false	false	false	false	false	false	false
IMS-10020-CVDP-97B6E818-B5B3-4CA8-A6C0-28A9D5DA4466		RKI	ncov	Human	B.1.1.7	20I (Alpha, V1)	2021-04-12	Europe	Germany	Berlin	Landkreis Berlin; Stadt	Berlin	10829	52.4761	13.3607		20I (Alpha, V1)	B.1.1.7	false	false	false	false	false	false	false	false	false
IMS-10150-CVDP-0F41DEC9-29E2-4455-B499-CC16E7D4D4D7		RKI	ncov	Human	B.1.1.7	20I (Alpha, V1)	2021-04-27	Europe	Germany	Nordrhein-Westfalen	Landkreis Leverkusen; Stadt	Leverkusen	51375	51.0331	7.052		20I (Alpha, V1)	B.1.1.7	false	false	false	false	false	false	false	false	false
6166ba5b81e18c1c41cecd95	1091316155	IIMK	ncov	Human	B.1.1.7	20I (Alpha, V1)	2021-04-03	Europe	Germany	Thuringia	Landkreis Ilm-Kreis	Arnstadt	99310	50.8343	10.9456	20	20I (Alpha, V1)	B.1.1.7	false	false	false	false	false	false	false	false	false
IMS-10150-CVDP-F002916B-54E9-4187-92C1-B577C7806305		RKI	ncov	Human	B.1.1.7	20I (Alpha, V1)	2021-04-29	Europe	Germany	Rheinland-Pfalz	Landkreis Trier; kreisfreie Stadt	Trier	54290	49.7537	6.6393		20I (Alpha, V1)	B.1.1.7	false	false	false	false	false	false	false	false	false
6166ba5c81e18c1c41ced74e	1024624693	IIMK	ncov	Human	B.1.1.7	20I (Alpha, V1)	2021-02-25	Europe	Germany	Thuringia	Landkreis Gotha	Georgenthal/Thür.Wald	99887	50.8321	10.6627	47	20I (Alpha, V1)	B.1.1.7	false	false	false	false	false	false	false	false	true
IMS-10122-CVDP-DC4D3B72-0C7A-429C-8E76-F5D6D091B7D7		RKI	ncov	Human	B.1.1.7	20I (Alpha, V1)	2021-02-09	Europe	Germany	Baden-Württemberg	Landkreis Karlsruhe	Karlsruhe	76131	49.0078	8.4199		20I (Alpha, V1)	B.1.1.7	false	false	false	false	false	false	false	false	false
IMS-10061-CVDP-D1971B80-FE69-4E32-B9FF-B493E39E1C80		RKI	ncov	Human	B.1.1.7	20I (Alpha, V1)	2021-05-03	Europe	Germany	Niedersachsen	Landkreis Hameln-Pyrmont	Hameln	31785	52.1037	9.3676		20I (Alpha, V1)	B.1.1.7	false	false	false	false	false	false	false	false	false
IMS-10375-CVDP-DA93499B-A139-4959-AC9E-39D2E7D5FA70		RKI	ncov	Human	B.1.1.7	20I (Alpha, V1)	2021-03-22	Europe	Germany	Baden-Württemberg	Landkreis Mannheim	Mannheim	68167	49.4996	8.4939		20I (Alpha, V1)	B.1.1.7	false	false	false	false	false	false	false	false	false
IMS-10122-CVDP-A347AEFD-6385-4C83-8A70-EAA0C3902AB8		RKI	ncov	Human	B.1.1.7	20I (Alpha, V1)	2021-02-24	Europe	Germany	Baden-Württemberg	Landkreis Karlsruhe	Karlsruhe	76131	49.0078	8.4199		20I (Alpha, V1)	B.1.1.7	false	false	false	false	false	false	false	false	false
IMS-10186-CVDP-772071A6-EEFF-474C-95CE-72970E7880F1		RKI	ncov	Human	B.1.1.7	20I (Alpha, V1)	2021-03-26	Europe	Germany	Nordrhein-Westfalen	Landkreis Düsseldorf; Stadt	Düsseldorf	40210	51.2216	6.7897		20I (Alpha, V1)	B.1.1.7	false	false	false	false	false	false	false	false	false
IMS-10218-CVDP-7D1EE737-012D-4667-BEE5-49F78FBECEE2		RKI	ncov	Human	B.1.1.7	20I (Alpha, V1)	2021-03-01	Europe	Germany	Sachsen-Anhalt	Landkreis Landeshauptstadt Magdeburg	Magdeburg	39104	52.1243	11.6322		20I (Alpha, V1)	B.1.1.7	false	false	false	false	false	false	false	false	false
IMS-10020-CVDP-29774DCC-1BDB-4E0D-813F-56B2A806BA11		RKI	ncov	Human	B.1.1.7	20I (Alpha, V1)	2021-02-25	Europe	Germany	Sachsen	Landkreis Leipzig	Rötha	4571	51.1978	12.4145		20I (Alpha, V1)	B.1.1.7	false	false	false	false	false	false	false	false	false
IMS-10004-CVDP-228E45DB-E9E7-467A-8331-0042D7FE0FA7		RKI	ncov	Human	B.1.1.7	20I (Alpha, V1)	2021-03-07	Europe	Germany	Schleswig-Holstein	Kreis Herzogtum Lauenburg	Kreis Herzogtum Lauenburg	21502	53.5966	10.5762		20I (Alpha, V1)	B.1.1.7	false	false	false	false	false	false	false	false	false
IMS-10020-CVDP-D55CBD8E-0EB0-469F-92DE-4ACBE4B9D163		RKI	ncov	Human	B.1.1.7	20I (Alpha, V1)	2021-04-03	Europe	Germany	Baden-Württemberg	Landkreis Esslingen	Leinfelden-Echterdingen	70771	48.6941	9.1681		20I (Alpha, V1)	B.1.1.7	false	false	false	false	false	false	false	false	false
IMS-10116-CVDP-59119FAE-78F8-46CD-A69A-EC0B8B32FC1A		RKI	ncov	Human	B.1.1.7	20I (Alpha, V1)	2021-05-03	Europe	Germany	Baden-Württemberg	Landkreis Ravensburg	Ravensburg	88212	47.7815	9.6183		20I (Alpha, V1)	Q.7	false	false	false	false	false	false	false	false	false
IMS-10122-CVDP-AAE4E555-68AB-4BDD-A772-121A28EA4828		RKI	ncov	Human	B.1.1.7	20I (Alpha, V1)	2021-03-17	Europe	Germany	Baden-Württemberg	Landkreis Karlsruhe	Karlsruhe	76131	49.0078	8.4199		20I (Alpha, V1)	B.1.1.7	false	false	false	false	false	false	false	false	false
6166ba5c81e18c1c41cedb93	1007021156	IIMK	ncov	Human	B.1.1.7	20I (Alpha, V1)	2021-03-16	Europe	Germany	Thuringia	Landkreis Gera	Gera	7549	50.8753	12.0788	215	20I (Alpha, V1)	B.1.1.7	false	false	false	false	false	false	false	false	false
IMS-10296-CVDP-C391C155-6BB2-4463-9F22-7F82FBE77C95		RKI	ncov	Human	B.1.1.7	20I (Alpha, V1)	2021-02-19	Europe	Germany	Hessen	Landkreis Gießen	Gießen	35392	50.5669	8.6538		20I (Alpha, V1)	B.1.1.7	false	false	false	false	false	false	false	false	false
IMS-10197-CVDP-8F2A271D-802E-4902-ADB1-679FD9C4B6AD		RKI	ncov	Human	B.1.1.7	20I (Alpha, V1)	2021-04-27	Europe	Germany	Sachsen-Anhalt	Landkreis Landeshauptstadt Magdeburg	Magdeburg	39124	52.1638	11.6333		20I (Alpha, V1)	B.1.1.7	false	false	false	false	false	false	false	false	false
IMS-10122-CVDP-ADD04D18-A95C-4237-AA06-45906CBFDC53		RKI	ncov	Human	B.1.1.7	20I (Alpha, V1)	2021-04-21	Europe	Germany	Bayern	Schweinfurt; Stadt	Schweinfurt	97422	50.0545	10.2441		20I (Alpha, V1)	B.1.1.7	false	false	false	false	false	false	false	false	false
IMS-10004-CVDP-7EF20698-7604-46FC-BA70-07CB13AAD995		RKI	ncov	Human	B.1.1.7	20I (Alpha, V1)	2021-04-02	Europe	Germany	Schleswig-Holstein	Kreis Herzogtum Lauenburg	Kreis Herzogtum Lauenburg	21502	53.5966	10.5762		20I (Alpha, V1)	B.1.1.7	false	false	false	false	false	false	false	false	false
IMS-10267-CVDP-9831279F-AB90-4F4B-9612-775661B9F406		RKI	ncov	Human	B.1.1.7	20I (Alpha, V1)	2021-02-22	Europe	Germany	Nordrhein-Westfalen	Landkreis Dortmund; Stadt	Dortmund	44137	51.5097	7.4601		20I (Alpha, V1)	B.1.1.7	false	false	false	false	false	false	false	false	false
IMS-10215-CVDP-4E783857-6707-4FEC-8E1B-84C4A6A97FE2		RKI	ncov	Human	B.1.1.7	20I (Alpha, V1)	2021-03-26	Europe	Germany	Sachsen	Kreisfreie Stadt Leipzig	Leipzig	4103	51.3405	12.3827		20I (Alpha, V1)	B.1.1.7	false	false	false	false	false	false	false	false	false
IMS-10020-CVDP-FE36A16B-3D47-4AF9-89C4-2176A5BA85F2		RKI	ncov	Human	B.1.1.7	20I (Alpha, V1)	2021-04-08	Europe	Germany	Rheinland-Pfalz	Landkreis Trier; kreisfreie Stadt	Trier	54290	49.7537	6.6393		20I (Alpha, V1)	B.1.1.7	false	false	false	false	false	false	false	false	false
IMS-10004-CVDP-F464A111-10A9-49F6-BC97-87766710FE6F		RKI	ncov	Human	B.1.1.7	20I (Alpha, V1)	2021-03-01	Europe	Germany	Schleswig-Holstein	Kreis Herzogtum Lauenburg	Kreis Herzogtum Lauenburg	21502	53.5966	10.5762		20I (Alpha, V1)	B.1.1.7	false	false	false	false	false	false	false	false	false
IMS-10117-CVDP-9470FFD3-257C-47AA-8B2D-91FE9CBFD1F9		RKI	ncov	Human	B.1.1.7	20I (Alpha, V1)	2021-03-30	Europe	Germany	Baden-Württemberg	Landkreis Rhein-Neckar-Kreis	Eppelheim	69214	49.4019	8.6364		20I (Alpha, V1)	B.1.1.7	false	false	false	false	false	false	false	false	false
IMS-10004-CVDP-BD620920-02A7-474F-A497-4BE9F79C888D		RKI	ncov	Human	B.1.1.7	20I (Alpha, V1)	2021-03-30	Europe	Germany	Schleswig-Holstein	Kreis Herzogtum Lauenburg	Kreis Herzogtum Lauenburg	21502	53.5966	10.5762		20I (Alpha, V1)	B.1.1.7	false	false	false	false	false	false	false	false	false
IMS-10013-CVDP-A97228BD-12F7-4219-B537-76B3D3B114BE		RKI	ncov	Human	B.1.1.7	20I (Alpha, V1)	2021-03-13	Europe	Germany	Sachsen	Landkreis Meißen	Landkreis Meißen	1665	51.2393	13.4717		20I (Alpha, V1)	B.1.1.7	false	false	false	false	false	false	false	false	false
IMS-10020-CVDP-A7E2BBC9-9006-4B2D-B850-C66CCA6906CB		RKI	ncov	Human	B.1.1.7	20I (Alpha, V1)	2021-05-03	Europe	Germany	Baden-Württemberg	Landkreis Esslingen	Leinfelden-Echterdingen	70771	48.6941	9.1681		20I (Alpha, V1)	B.1.1.7	false	false	false	false	false	false	false	false	false
IMS-10122-CVDP-5BA1A790-DB10-4A51-A30F-1EF0EAA3FF99		RKI	ncov	Human	B.1.1.7	20I (Alpha, V1)	2021-02-08	Europe	Germany	Baden-Württemberg	Landkreis Karlsruhe	Karlsruhe	76131	49.0078	8.4199		20I (Alpha, V1)	B.1.1.7	false	false	false	false	false	false	false	false	false
IMS-10020-CVDP-F49C998A-EF38-4006-9CB6-5D2FCDD17D8B		RKI	ncov	Human	B.1.1.7	20I (Alpha, V1)	2021-04-13	Europe	Germany	Baden-Württemberg	Landkreis Esslingen	Leinfelden-Echterdingen	70771	48.6941	9.1681		20I (Alpha, V1)	B.1.1.7	false	false	false	false	false	false	false	false	false
IMS-10004-CVDP-CC4B4D86-C0F8-4869-BE85-7619ECBB9F40		RKI	ncov	Human	B.1.1.7	20I (Alpha, V1)	2021-02-26	Europe	Germany	Schleswig-Holstein	Kreis Herzogtum Lauenburg	Kreis Herzogtum Lauenburg	21502	53.5966	10.5762		20I (Alpha, V1)	B.1.1.7	false	false	false	false	false	false	false	false	false
IMS-10013-CVDP-4C659C7C-C65A-4147-95F4-CBA24F1F68E5		RKI	ncov	Human	B.1.1.7	20I (Alpha, V1)	2021-04-10	Europe	Germany	Bremen	Landkreis Bremerhaven; Stadt	Bremerhaven	27580	53.5685	8.5968		20I (Alpha, V1)	B.1.1.7	false	false	false	false	false	false	false	false	false
IMS-10150-CVDP-B819C4BD-E26C-4F93-8C61-F6828A9A4F86		RKI	ncov	Human	B.1.1.7	20I (Alpha, V1)	2021-04-29	Europe	Germany	Rheinland-Pfalz	Landkreis Trier; kreisfreie Stadt	Trier	54290	49.7537	6.6393		20I (Alpha, V1)	B.1.1.7	false	false	false	false	false	false	false	false	false
IMS-10087-CVDP-7BDAE42A-6231-4A54-ABD1-B35D37CB2C1D		RKI	ncov	Human	B.1.1.7	20I (Alpha, V1)	2021-05-03	Europe	Germany	Nordrhein-Westfalen	Landkreis Köln; Stadt	Köln	50858	50.9243	6.8565		20I (Alpha, V1)	B.1.1.7	false	false	false	false	false	false	false	false	false
6166ba5b81e18c1c41ced0d5	1091328024	IIMK	ncov	Human	B.1.1.7	20I (Alpha, V1)	2021-04-15	Europe	Germany	Thuringia	Landkreis Nordhausen	Bleicherode	99752	51.4677	10.5922	0	20I (Alpha, V1)	B.1.1.7	false	false	false	false	false	false	false	false	false
IMS-10087-CVDP-2D1AA56B-5C5E-4318-BDC2-0E6977438EF4		RKI	ncov	Human	B.1.1.7	20I (Alpha, V1)	2021-05-06	Europe	Germany	Nordrhein-Westfalen	Landkreis Köln; Stadt	Köln	50858	50.9243	6.8565		20I (Alpha, V1)	B.1.1.7	false	false	false	false	false	false	false	false	false
IMS-10013-CVDP-16A55BE1-A6AE-48F6-8521-9DD9DAD1DF0A		RKI	ncov	Human	B.1.1.7	20I (Alpha, V1)	2021-03-24	Europe	Germany	Bayern	Landkreis Augsburg; Stadt	Augsburg	86154	48.3932	10.8814		20I (Alpha, V1)	B.1.1.7	false	false	false	false	false	false	false	false	false
IMS-10656-CVDP-4CD39496-6321-4B40-968B-9BD0CA86EE2C		RKI	ncov	Human	B.1.1.7	20I (Alpha, V1)	2021-03-05	Europe	Germany	Sachsen	Kreisfreie Stadt Leipzig	Leipzig	4103	51.3405	12.3827		20I (Alpha, V1)	B.1.1.7	false	false	false	false	false	false	false	false	false
IMS-10013-CVDP-84B841BC-9E69-4075-A0B9-F8C7D94E65DC		RKI	ncov	Human	B.1.1.7	20I (Alpha, V1)	2021-02-18	Europe	Germany	Sachsen	Landkreis Nordsachsen	Wermsdorf	4779	51.2833	12.95		20I (Alpha, V1)	B.1.1.7	false	false	false	false	false	false	false	false	false
IMS-10122-CVDP-EDC430DA-99F8-4A59-826E-7D28346334A1		RKI	ncov	Human	B.1.1.7	20I (Alpha, V1)	2021-03-22	Europe	Germany	Baden-Württemberg	Landkreis Ravensburg	Ravensburg	88212	47.7815	9.6183		20I (Alpha, V1)	B.1.1.7	false	false	false	false	false	false	false	false	false
IMS-10087-CVDP-FE350AF7-E7C1-43D9-A8D6-09EEF51A1030		RKI	ncov	Human	B.1.1.7	20I (Alpha, V1)	2021-03-01	Europe	Germany	Nordrhein-Westfalen	Landkreis Köln; Stadt	Köln	50858	50.9243	6.8565		20I (Alpha, V1)	B.1.1.7	false	false	false	false	false	false	false	false	false
IMS-10267-CVDP-B11DCD68-6803-4100-AAA1-6AA5BB858659		RKI	ncov	Human	B.1.1.7	20I (Alpha, V1)	2021-02-12	Europe	Germany	Nordrhein-Westfalen	Landkreis Dortmund; Stadt	Dortmund	44137	51.5097	7.4601		20I (Alpha, V1)	B.1.1.7	false	false	false	false	false	false	false	false	false
IMS-10020-CVDP-90725D7B-D47C-4CE6-A093-8C7B66C4641A		RKI	ncov	Human	B.1.1.7	20I (Alpha, V1)	2021-05-03	Europe	Germany	Baden-Württemberg	Landkreis Esslingen	Leinfelden-Echterdingen	70771	48.6941	9.1681		20I (Alpha, V1)	B.1.1.7	false	false	false	false	false	false	false	false	false
IMS-10122-CVDP-4F82AADB-7953-496F-90E6-E3C09DB98832		RKI	ncov	Human	B.1.1.7	20I (Alpha, V1)	2021-02-16	Europe	Germany	Baden-Württemberg	Landkreis Ravensburg	Ravensburg	88212	47.7815	9.6183		20I (Alpha, V1)	B.1.1.7	false	false	false	false	false	false	false	false	false
IMS-10020-CVDP-0D2ED75B-3557-4512-BFB1-9D684D865096		RKI	ncov	Human	B.1.1.7	20I (Alpha, V1)	2021-03-30	Europe	Germany	Rheinland-Pfalz	Landkreis Trier; kreisfreie Stadt	Trier	54290	49.7537	6.6393		20I (Alpha, V1)	B.1.1.7	false	false	false	false	false	false	false	false	false
IMS-10013-CVDP-17207BDA-57B4-4649-9A2B-886705F3B9F9		RKI	ncov	Human	B.1.1.7	20I (Alpha, V1)	2021-04-07	Europe	Germany	Bayern	Landkreis Augsburg; Stadt	Augsburg	86154	48.3932	10.8814		20I (Alpha, V1)	B.1.1.7	false	false	false	false	false	false	false	false	false
IMS-10197-CVDP-3DE2B631-F040-438A-A9F1-ABE0D87E1730		RKI	ncov	Human	B.1.1.7	20I (Alpha, V1)	2021-05-03	Europe	Germany	Sachsen-Anhalt	Landkreis Landeshauptstadt Magdeburg	Magdeburg	39124	52.1638	11.6333		20I (Alpha, V1)	B.1.1.7	false	false	false	false	false	false	false	false	false
6166ba5c81e18c1c41ced9d7	1028090046	IIMK	ncov	Human	B.1.1.7	20I (Alpha, V1)	2021-03-09	Europe	Germany	Thuringia	Landkreis Jena; Stadt	Jena	7703	50.9283	11.5853	260	20I (Alpha, V1)	B.1.1.7	false	false	false	false	false	false	false	false	false
6166ba5b81e18c1c41ced323	1028313475	IIMK	ncov	Human	B.1.1.7	20I (Alpha, V1)	2021-04-19	Europe	Germany	Thuringia	Landkreis Ilm-Kreis	Arnstadt	99310	50.8343	10.9456	192	20I (Alpha, V1)	B.1.1.7	false	false	false	false	false	false	false	false	true
IMS-10272-CVDP-DE92FABB-DB81-4795-A349-70A02DC7E4C1		RKI	ncov	Human	B.1.1.7	20I (Alpha, V1)	2021-04-13	Europe	Germany	Bayern	Landkreis München	Oberschleißheim	85764	48.25	11.5667		20I (Alpha, V1)	B.1.1.7	false	false	false	false	false	false	false	false	false
61792019ba758861d782ee96	DN00591_6050638	IIMK	ncov	Human	B.1.1.7	20I (Alpha, V1)	2021-05-06	Europe	Germany	Thuringia	landkreis Saalfeld-Rudolstadt	Saalfeld/Saale	7318	50.6516	11.3764	189	20I (Alpha, V1)	B.1.1.7	false	false	false	true	false	false	false	false	false
IMS-10020-CVDP-7B4C2397-1FF3-48B5-8A96-937921011FBE		RKI	ncov	Human	B.1.1.7	20I (Alpha, V1)	2021-03-25	Europe	Germany	Rheinland-Pfalz	Landkreis Trier; kreisfreie Stadt	Trier	54290	49.7537	6.6393		20I (Alpha, V1)	B.1.1.7	false	false	false	false	false	false	false	false	false
IMS-10013-CVDP-71A84AF9-30B7-4085-8350-B7BCE12AEB95		RKI	ncov	Human	B.1.1.7	20I (Alpha, V1)	2021-03-03	Europe	Germany	Sachsen	Landkreis Nordsachsen	Wermsdorf	4779	51.2833	12.95		20I (Alpha, V1)	B.1.1.7	false	false	false	false	false	false	false	false	false
6166b85c81e18c1c41cec70e	IMS-10013-CVDP-eaeffa8a-8f88-411b-8e68-9bd0f4439154	IIMK	ncov	Human	B.1.1.7	20I (Alpha, V1)	2021-04-06	Europe	Germany	Thuringia	Landkreis Gotha	Dreigleichen	99869	50.8916	10.8103	32	20I (Alpha, V1)	B.1.1.7	false	false	false	false	false	false	false	false	false
IMS-10174-CVDP-A70CB698-E87F-4E40-835C-0C8772B86DA5		RKI	ncov	Human	B.1.1.7	20I (Alpha, V1)	2021-03-22	Europe	Germany	Bayern	Kreisfreie Stadt München	München	80937	48.1974	11.5721		20I (Alpha, V1)	B.1.1.7	false	false	false	false	false	false	false	false	false
IMS-10122-CVDP-AFF18BCD-A375-4973-A613-F455FA79DB44		RKI	ncov	Human	B.1.1.7	20I (Alpha, V1)	2021-02-11	Europe	Germany	Baden-Württemberg	Landkreis Karlsruhe	Karlsruhe	76131	49.0078	8.4199		20I (Alpha, V1)	B.1.1.7	false	false	false	false	false	false	false	false	false
IMS-10338-CVDP-767A09B6-3625-4B12-ACFC-90D3999E324F		RKI	ncov	Human	B.1.1.7	20I (Alpha, V1)	2021-02-22	Europe	Germany	Hessen	Landkreis Frankfurt am Main; Stadt	Frankfurt am Main	60327	50.1038	8.6522		20I (Alpha, V1)	B.1.1.7	false	false	false	false	false	false	false	false	false
IMS-10020-CVDP-318DBB18-2A79-4C9D-AABA-170C11B4ABE9		RKI	ncov	Human	B.1.1.7	20I (Alpha, V1)	2021-02-24	Europe	Germany	Bayern	Landkreis Weiden i.d.OPf.	Weiden	92637	49.6768	12.1561		20I (Alpha, V1)	B.1.1.7	false	false	false	false	false	false	false	false	false
6166ba5b81e18c1c41ced652	1091339031	IIMK	ncov	Human	B.1.1.7	20I (Alpha, V1)	2021-04-27	Europe	Germany	Thuringia	Landkreis Unstrut-Hainich-Kreis	Bad Langensalza	99947	51.1089	10.6475	1299	20I (Alpha, V1)	B.1.1.7	false	false	false	false	false	false	false	false	false
IMS-10020-CVDP-572AAD75-DA12-461B-BA42-8496BA0C3849		RKI	ncov	Human	B.1.1.7	20I (Alpha, V1)	2021-02-17	Europe	Germany	Bayern	Landkreis Weiden i.d.OPf.	Weiden	92637	49.6768	12.1561		20I (Alpha, V1)	B.1.1.7	false	false	false	false	false	false	false	false	false
IMS-10020-CVDP-3AE77669-6526-4AFA-AD67-1B51E6C0B57E		RKI	ncov	Human	B.1.1.7	20I (Alpha, V1)	2021-05-05	Europe	Germany	Baden-Württemberg	Landkreis Esslingen	Leinfelden-Echterdingen	70771	48.6941	9.1681		20I (Alpha, V1)	B.1.1.7	false	false	false	false	false	false	false	false	false
IMS-10020-CVDP-D87ED041-FDDB-4D9A-BBF8-EBF5F7FED87A		RKI	ncov	Human	B.1.1.7	20I (Alpha, V1)	2021-04-20	Europe	Germany	Nordrhein-Westfalen	Landkreis Leverkusen; Stadt	Leverkusen	51375	51.0331	7.052		20I (Alpha, V1)	Q.7	false	false	false	false	false	false	false	false	false
IMS-10150-CVDP-2530EEBD-E1BA-43BC-B898-561D93CE4C31		RKI	ncov	Human	B.1.1.7	20I (Alpha, V1)	2021-04-22	Europe	Germany	Bayern	Landkreis Augsburg; Stadt	Augsburg	86156	48.3815	10.8548		20I (Alpha, V1)	B.1.1.7	false	false	false	false	false	false	false	false	false
IMS-10025-CVDP-00871		RKI	ncov	Human	B.1.1.7	20I (Alpha, V1)	2021-02-05	Europe	Germany	Berlin	Landkreis Berlin; Stadt	Berlin	10409	52.5443	13.4414		20I (Alpha, V1)	B.1.1.7	false	false	false	false	false	false	false	false	false
6166ba5b81e18c1c41ced325	1028313608	IIMK	ncov	Human	B.1.1.7	20I (Alpha, V1)	2021-04-21	Europe	Germany	Thuringia	Landkreis Ilm-Kreis	Arnstadt	99310	50.8343	10.9456	0	20I (Alpha, V1)	B.1.1.7	false	false	false	false	false	false	false	false	false
IMS-10020-CVDP-6D62AD13-8323-4B67-BC8D-D67D6E4949EF		RKI	ncov	Human	B.1.1.7	20I (Alpha, V1)	2021-04-25	Europe	Germany	Sachsen	Landkreis Leipzig	Rötha	4571	51.1978	12.4145		20I (Alpha, V1)	B.1.1.7	false	false	false	false	false	false	false	false	false
IMS-10122-CVDP-13158B5A-639B-4B6F-8ADC-D622564214FE		RKI	ncov	Human	B.1.1.7	20I (Alpha, V1)	2021-02-19	Europe	Germany	Baden-Württemberg	Landkreis Karlsruhe	Karlsruhe	76131	49.0078	8.4199		20I (Alpha, V1)	B.1.1.7	false	false	false	false	false	false	false	false	false
IMS-10013-CVDP-152690F9-F8E0-45F5-832A-9508E07A30F7		RKI	ncov	Human	B.1.1.7	20I (Alpha, V1)	2021-03-24	Europe	Germany	Bayern	Landkreis Augsburg; Stadt	Augsburg	86154	48.3932	10.8814		20I (Alpha, V1)	B.1.1.7	false	false	false	false	false	false	false	false	false
IMS-10122-CVDP-8313E99D-E895-471B-9829-C662F92ED7DF		RKI	ncov	Human	B.1.1.7	20I (Alpha, V1)	2021-04-24	Europe	Germany	Baden-Württemberg	Landkreis Karlsruhe	Karlsruhe	76131	49.0078	8.4199		20I (Alpha, V1)	B.1.1.7	false	false	false	false	false	false	false	false	false
IMS-10295-CVDP-5EEEF378-A621-4797-8318-715D45B0798E		RKI	ncov	Human	B.1.1.7	20I (Alpha, V1)	2021-02-19	Europe	Germany	Niedersachsen	Landkreis Region Hannover	Hannover	30623	52.3795	9.8075		20I (Alpha, V1)	B.1.1.7	false	false	false	false	false	false	false	false	false
IMS-10020-CVDP-A1810C57-0999-4767-972B-6131C696F451		RKI	ncov	Human	B.1.1.7	20I (Alpha, V1)	2021-04-14	Europe	Germany	Baden-Württemberg	Landkreis Esslingen	Leinfelden-Echterdingen	70771	48.6941	9.1681		20I (Alpha, V1)	B.1.1.7	false	false	false	false	false	false	false	false	false
IMS-10213-CVDP-3B4EBE27-0973-4C41-B547-8CC3ED0D64B1		RKI	ncov	Human	B.1.1.7	20I (Alpha, V1)	2021-04-12	Europe	Germany	Sachsen	Kreisfreie Stadt Dresden	Dresden	1067	51.0628	13.7297		20I (Alpha, V1)	B.1.1.7	false	false	false	false	false	false	false	false	false
IMS-10261-CVDP-966F5872-DFD7-49F7-9600-EC9A631559C3		RKI	ncov	Human	B.1.1.7	20I (Alpha, V1)	2021-02-09	Europe	Germany	Nordrhein-Westfalen	Landkreis Lippe	Bad Salzuflen	32105	52.0808	8.7505		20I (Alpha, V1)	B.1.1.7	false	false	false	false	false	false	false	false	false
IMS-10375-CVDP-B15AE731-8D35-4767-B611-E3F610113DAE		RKI	ncov	Human	B.1.1.7	20I (Alpha, V1)	2021-04-10	Europe	Germany	Baden-Württemberg	Landkreis Mannheim	Mannheim	68167	49.4996	8.4939		20I (Alpha, V1)	B.1.1.7	false	false	false	false	false	false	false	false	false
IMS-10117-CVDP-6D3E6BFA-773A-4D7B-B579-63F1208C26A9		RKI	ncov	Human	B.1.1.7	20I (Alpha, V1)	2021-03-31	Europe	Germany	Nordrhein-Westfalen	Landkreis Leverkusen; Stadt	Leverkusen	51375	51.0331	7.052		20I (Alpha, V1)	B.1.1.7	false	false	false	false	false	false	false	false	false
IMS-10116-CVDP-177CF551-9EAC-4961-AF25-3645097773C8		RKI	ncov	Human	B.1.1.7	20I (Alpha, V1)	2021-03-22	Europe	Germany	Berlin	Landkreis Berlin; Stadt	Berlin	13407	52.5727	13.3512		20I (Alpha, V1)	B.1.1.7	false	false	false	false	false	false	false	false	false
IMS-10020-CVDP-1100E9FD-FA2D-48BA-A356-C10809F67F97		RKI	ncov	Human	B.1.1.7	20I (Alpha, V1)	2021-04-17	Europe	Germany	Nordrhein-Westfalen	Landkreis Leverkusen; Stadt	Leverkusen	51375	51.0331	7.052		20I (Alpha, V1)	B.1.1.7	false	false	false	false	false	false	false	false	false
IMS-10370-CVDP-53515521-16C0-45CC-B929-467600818A5C		RKI	ncov	Human	B.1.1.7	20I (Alpha, V1)	2021-03-19	Europe	Germany	Brandenburg	Kreisfreie Stadt Potsdam	Potsdam	14467	52.403	13.0626		20I (Alpha, V1)	B.1.1.7	false	false	false	false	false	false	false	false	false
IMS-10020-CVDP-127662B5-4257-4655-B5C2-EE5F8DF82B23		RKI	ncov	Human	B.1.1.7	20I (Alpha, V1)	2021-04-10	Europe	Germany	Rheinland-Pfalz	Landkreis Trier; kreisfreie Stadt	Trier	54290	49.7537	6.6393		20I (Alpha, V1)	B.1.1.7	false	false	false	false	false	false	false	false	false
IMS-10023-CVDP-2271DD9F-FD70-491E-AA0A-C1DBA24D9894		RKI	ncov	Human	B.1.1.7	20I (Alpha, V1)	2021-04-14	Europe	Germany	Sachsen	Landkreis Erzgebirgskreis	Neukirchen/Erzgebirge	9221	50.7835	12.87		20I (Alpha, V1)	B.1.1.7	false	false	false	false	false	false	false	false	false
IMS-10293-CVDP-3F036003-9D5A-4724-8306-4399209D68EF		RKI	ncov	Human	B.1.1.7	20I (Alpha, V1)	2021-01-11	Europe	Germany	Baden-Württemberg	Landkreis Stuttgart	Stuttgart	70191	48.7728	9.18184		20I (Alpha, V1)	B.1.1.7	false	false	false	false	false	false	false	false	false
IMS-10020-CVDP-CFF483E8-23A3-4615-96B2-B6D4881BF928		RKI	ncov	Human	B.1.1.7	20I (Alpha, V1)	2021-02-27	Europe	Germany	Baden-Württemberg	Landkreis Esslingen	Leinfelden-Echterdingen	70771	48.6941	9.1681		20I (Alpha, V1)	B.1.1.7	false	false	false	false	false	false	false	false	false
IMS-10020-CVDP-BD71DBD1-12DD-4AD0-A5A2-C68491DA5DAC		RKI	ncov	Human	B.1.1.7	20I (Alpha, V1)	2021-04-13	Europe	Germany	Baden-Württemberg	Landkreis Esslingen	Leinfelden-Echterdingen	70771	48.6941	9.1681		20I (Alpha, V1)	B.1.1.7	false	false	false	false	false	false	false	false	false
IMS-10020-CVDP-A44498B9-FAC9-4D84-A520-7A44AA896DAB		RKI	ncov	Human	B.1.1.7	20I (Alpha, V1)	2021-04-17	Europe	Germany	Rheinland-Pfalz	Landkreis Trier; kreisfreie Stadt	Trier	54290	49.7537	6.6393		20I (Alpha, V1)	B.1.1.7	false	false	false	false	false	false	false	false	false
IMS-10116-CVDP-093DAFF6-BA81-4C8A-BE8B-5E200E6FBF5F		RKI	ncov	Human	B.1.1.7	20I (Alpha, V1)	2021-02-03	Europe	Germany	Sachsen	Kreisfreie Stadt Leipzig	Leipzig	4289	51.3667	12.3833		20I (Alpha, V1)	B.1.1.7	false	false	false	false	false	false	false	false	false
IMS-10218-CVDP-8C2C11D8-62C5-42E8-999F-91F9DD39560F		RKI	ncov	Human	B.1.1.7	20I (Alpha, V1)	2021-03-15	Europe	Germany	Sachsen-Anhalt	Landkreis Landeshauptstadt Magdeburg	Magdeburg	39104	52.1243	11.6322		20I (Alpha, V1)	B.1.1.7	false	false	false	false	false	false	false	false	false
IMS-10116-CVDP-AF3100CA-0143-4818-B41A-82E9D24A75B1		RKI	ncov	Human	B.1.1.7	20I (Alpha, V1)	2021-05-03	Europe	Germany	Baden-Württemberg	Landkreis Ravensburg	Ravensburg	88212	47.7815	9.6183		20I (Alpha, V1)	B.1.1.7	false	false	false	false	false	false	false	false	false
IMS-10020-CVDP-538BE39B-D1DF-4355-8904-B1D740987A55		RKI	ncov	Human	B.1.1.7	20I (Alpha, V1)	2021-03-22	Europe	Germany	Baden-Württemberg	Landkreis Esslingen	Leinfelden-Echterdingen	70771	48.6941	9.1681		20I (Alpha, V1)	B.1.1.7	false	false	false	false	false	false	false	false	false
IMS-10117-CVDP-BC311B9C-7D57-45A1-8003-B047A6595FA5		RKI	ncov	Human	B.1.1.7	20I (Alpha, V1)	2021-03-30	Europe	Germany	Baden-Württemberg	Landkreis Karlsruhe	Ettlingen	76275	48.9409	8.4076		20I (Alpha, V1)	Q.7	false	false	false	false	false	false	false	false	false
IMS-10150-CVDP-A06D529F-7F3D-413A-8AB3-D3ED524C94AC		RKI	ncov	Human	B.1.1.7	20I (Alpha, V1)	2021-05-04	Europe	Germany	Rheinland-Pfalz	Landkreis Trier; kreisfreie Stadt	Trier	54290	49.7537	6.6393		20I (Alpha, V1)	B.1.1.7	false	false	false	false	false	false	false	false	false
6166ba5b81e18c1c41cecf25	1024586979	IIMK	ncov	Human	B.1.1.7	20I (Alpha, V1)	2021-04-08	Europe	Germany	Thuringia	Landkreis Eichsfeld	Heiligenstadt	37308	51.378	10.1376	28	20I (Alpha, V1)	B.1.1.7	false	false	false	false	false	false	false	false	false
IMS-10150-CVDP-5D23C29E-6D5E-41AA-82BC-6F30AAE262E1		RKI	ncov	Human	B.1.1.7	20I (Alpha, V1)	2021-05-01	Europe	Germany	Rheinland-Pfalz	Landkreis Trier; kreisfreie Stadt	Trier	54290	49.7537	6.6393		20I (Alpha, V1)	B.1.1.7	false	false	false	false	false	false	false	false	false
6166ba5c81e18c1c41ced8e7	1028311939	IIMK	ncov	Human	B.1.1.7	20I (Alpha, V1)	2021-03-03	Europe	Germany	Thuringia	Landkreis Ilm-Kreis	Arnstadt	99310	50.8343	10.9456	72	20I (Alpha, V1)	B.1.1.7	false	false	false	false	false	false	false	false	false
6166ba5b81e18c1c41cecd5e	1024625336	IIMK	ncov	Human	B.1.1.7	20I (Alpha, V1)	2021-04-02	Europe	Germany	Thuringia	Landkreis Gotha	Nesse-Apfelstädt	99192	50.921	10.9039	312	20I (Alpha, V1)	B.1.1.7	false	false	false	false	false	false	false	false	false
IMS-10013-CVDP-F0762552-02A5-4404-962A-1C8C83EC8DAE		RKI	ncov	Human	B.1.1.7	20I (Alpha, V1)	2021-03-18	Europe	Germany	Baden-Württemberg	Landkreis Karlsruhe	Karlsruhe	76199	48.9661	8.4043		20I (Alpha, V1)	B.1.1.7	false	false	false	false	false	false	false	false	false
IMS-10013-CVDP-D69BA918-648E-4B0E-8B84-4DB4FE8609E3		RKI	ncov	Human	B.1.1.7	20I (Alpha, V1)	2021-03-27	Europe	Germany	Sachsen	Landkreis Nordsachsen	Wermsdorf	4779	51.2833	12.95		20I (Alpha, V1)	B.1.1.7	false	false	false	false	false	false	false	false	false
IMS-10013-CVDP-9D3B98CA-8668-4999-A226-C51A802376E2		RKI	ncov	Human	B.1.1.7	20I (Alpha, V1)	2021-03-02	Europe	Germany	Niedersachsen	Landkreis Oldenburg (Oldenburg); Stadt	Oldenburg	26135	53.1267	8.2384		20I (Alpha, V1)	B.1.1.7	false	false	false	false	false	false	false	false	false
IMS-10033-CVDP-6129F09F-05CF-4F2D-9C7B-AA1B44C87102		RKI	ncov	Human	B.1.1.7	20I (Alpha, V1)	2021-03-26	Europe	Germany	Berlin	Landkreis Berlin; Stadt	Berlin	13353	52.5416	13.3495		20I (Alpha, V1)	B.1.1.7	false	false	false	false	false	false	false	false	false
IMS-10020-CVDP-73CA2F57-2CC8-4144-B799-BF76D6890A35		RKI	ncov	Human	B.1.1.7	20I (Alpha, V1)	2021-03-16	Europe	Germany	Rheinland-Pfalz	Landkreis Trier; kreisfreie Stadt	Trier	54290	49.7537	6.6393		20I (Alpha, V1)	B.1.1.7	false	false	false	false	false	false	false	false	false
IMS-10013-CVDP-05348879-A3B4-49EF-A3A7-4EDD33F25CA3		RKI	ncov	Human	B.1.1.7	20I (Alpha, V1)	2021-04-12	Europe	Germany	Sachsen	Landkreis Nordsachsen	Wermsdorf	4779	51.2833	12.95		20I (Alpha, V1)	B.1.1.7	false	false	false	false	false	false	false	false	false
IMS-10218-CVDP-F32F185A-C548-4B3E-905E-02A36583BD9A		RKI	ncov	Human	B.1.1.7	20I (Alpha, V1)	2021-03-23	Europe	Germany	Sachsen-Anhalt	Landkreis Landeshauptstadt Magdeburg	Magdeburg	39104	52.1243	11.6322		20I (Alpha, V1)	B.1.1.7	false	false	false	false	false	false	false	false	false
IMS-10146-CVDP-CC589F6B-6EF3-4477-91EB-288E63CEDC65		RKI	ncov	Human	B.1.1.7	20I (Alpha, V1)	2021-02-11	Europe	Germany	Baden-Württemberg	Landkreis Ulm; Stadt	Ulm	89073	48.4015	9.9927		20I (Alpha, V1)	B.1.1.7	false	false	false	false	false	false	false	false	false
IMS-10603-CVDP-B03E6DBE-0912-4D26-A074-930A3C4FEDF4		RKI	ncov	Human	B.1.1.7	20I (Alpha, V1)	2021-02-18	Europe	Germany	Saarland	Landkreis Saarpfalz-Kreis	Homburg	66424	49.3264	7.3387		20I (Alpha, V1)	B.1.1.7	false	false	false	false	false	false	false	false	false
61792019ba758861d782eeda	DN00662_28050817	IIMK	ncov	Human	B.1.1.7	20I (Alpha, V1)	2021-05-27	Europe	Germany	Thuringia	Landkreis Sonneberg	Lauscha	98724	50.4753	11.1597	189	20I (Alpha, V1)	B.1.1.7	false	false	false	false	false	false	false	false	false
IMS-10004-CVDP-B009B5A5-DEA7-4DF6-99DD-329A50CED813		RKI	ncov	Human	B.1.1.7	20I (Alpha, V1)	2021-03-29	Europe	Germany	Schleswig-Holstein	Kreis Herzogtum Lauenburg	Kreis Herzogtum Lauenburg	21502	53.5966	10.5762		20I (Alpha, V1)	B.1.1.7	false	false	false	false	false	false	false	false	false
IMS-10122-CVDP-D795ABFF-D1DA-4DB6-8E36-3C7225FAD6C3		RKI	ncov	Human	B.1.1.7	20I (Alpha, V1)	2021-02-23	Europe	Germany	Baden-Württemberg	Landkreis Karlsruhe	Karlsruhe	76131	49.0078	8.4199		20I (Alpha, V1)	B.1.1.7	false	false	false	false	false	false	false	false	false
IMS-10013-CVDP-6B75D448-0531-4966-AB21-D6DED130F14C		RKI	ncov	Human	B.1.1.7	20I (Alpha, V1)	2021-03-09	Europe	Germany	Sachsen	Landkreis Nordsachsen	Wermsdorf	4779	51.2833	12.95		20I (Alpha, V1)	B.1.1.7	false	false	false	false	false	false	false	false	false
IMS-10186-CVDP-B46D4DA7-F19F-4625-B1A0-C1D82AD1C409		RKI	ncov	Human	B.1.1.7	20I (Alpha, V1)	2021-04-15	Europe	Germany	Nordrhein-Westfalen	Landkreis Düsseldorf; Stadt	Düsseldorf	40210	51.2216	6.7897		20I (Alpha, V1)	B.1.1.7	false	false	false	false	false	false	false	false	false
IMS-10150-CVDP-1EDCE75F-8AAA-4D40-A30A-AAF2BC665536		RKI	ncov	Human	B.1.1.7	20I (Alpha, V1)	2021-05-04	Europe	Germany	Rheinland-Pfalz	Landkreis Trier; kreisfreie Stadt	Trier	54290	49.7537	6.6393		20I (Alpha, V1)	B.1.1.7	false	false	false	false	false	false	false	false	false
IMS-10020-CVDP-78B71CD5-BD75-40EC-83DA-E3BC27FC30C0		RKI	ncov	Human	B.1.1.7	20I (Alpha, V1)	2021-02-10	Europe	Germany	Bayern	Landkreis Weiden i.d.OPf.	Weiden	92637	49.6768	12.1561		20I (Alpha, V1)	B.1.1.7	false	false	false	false	false	false	false	false	false
IMS-10341-CVDP-35FFAAA0-25AF-42E5-ADD6-5DA8377F95BE		RKI	ncov	Human	B.1.1.7	20I (Alpha, V1)	2021-02-26	Europe	Germany	Nordrhein-Westfalen	Landkreis Münster; Stadt	Münster	48147	51.9858	7.648		20I (Alpha, V1)	B.1.1.7	false	false	false	false	false	false	false	false	false
IMS-10020-CVDP-E99F425B-ADE5-48B0-9AD6-852C376BDD5D		RKI	ncov	Human	B.1.1.7	20I (Alpha, V1)	2021-02-10	Europe	Germany	Baden-Württemberg	Landkreis Esslingen	Leinfelden-Echterdingen	70771	48.6941	9.1681		20I (Alpha, V1)	B.1.1.7	false	false	false	false	false	false	false	false	false
IMS-10013-CVDP-9238832F-04A3-4900-8192-037F14346CE6		RKI	ncov	Human	B.1.1.7	20I (Alpha, V1)	2021-03-18	Europe	Germany	Sachsen	Landkreis Nordsachsen	Wermsdorf	4779	51.2833	12.95		20I (Alpha, V1)	B.1.1.7	false	false	false	false	false	false	false	false	false
IMS-10020-CVDP-C579A60C-6AAB-46A6-A61C-21A12622FDD1		RKI	ncov	Human	B.1.1.7	20I (Alpha, V1)	2021-04-16	Europe	Germany	Nordrhein-Westfalen	Landkreis Leverkusen; Stadt	Leverkusen	51375	51.0331	7.052		20I (Alpha, V1)	B.1.1.7	false	false	false	false	false	false	false	false	false
IMS-10020-CVDP-ECB5534D-F82F-4430-A5F8-A01568FA7B6C		RKI	ncov	Human	B.1.1.7	20I (Alpha, V1)	2021-03-19	Europe	Germany	Berlin	Landkreis Berlin; Stadt	Berlin	10829	52.4761	13.3607		20I (Alpha, V1)	B.1.1.7	false	false	false	false	false	false	false	false	false
IMS-10020-CVDP-9C3E028F-863F-41B1-8214-7E6837AB1887		RKI	ncov	Human	B.1.1.7	20I (Alpha, V1)	2021-03-24	Europe	Germany	Rheinland-Pfalz	Landkreis Trier; kreisfreie Stadt	Trier	54290	49.7537	6.6393		20I (Alpha, V1)	B.1.1.7	false	false	false	true	false	false	false	false	false
IMS-10375-CVDP-875A0D90-F591-45BA-A662-EAE50ED976B6		RKI	ncov	Human	B.1.1.7	20I (Alpha, V1)	2021-03-28	Europe	Germany	Baden-Württemberg	Landkreis Mannheim	Mannheim	68167	49.4996	8.4939		20I (Alpha, V1)	B.1.1.7	false	false	false	false	false	false	false	false	false
IMS-10013-CVDP-FB7321D2-7C5D-4DDE-95C6-11C09A548EC6		RKI	ncov	Human	B.1.1.7	20I (Alpha, V1)	2021-04-02	Europe	Germany	Niedersachsen	Landkreis Region Hannover	Hannover	30163	52.3943	9.7475		20I (Alpha, V1)	B.1.1.7	false	false	false	false	false	false	false	false	false
IMS-10013-CVDP-0337CD42-08D3-46BC-9B71-C8527A925E48		RKI	ncov	Human	B.1.1.7	20I (Alpha, V1)	2021-03-31	Europe	Germany	Bayern	Landkreis Augsburg; Stadt	Augsburg	86154	48.3932	10.8814		20I (Alpha, V1)	B.1.1.7	false	false	false	false	false	false	false	false	false
IMS-10117-CVDP-FBA74529-595F-4A9A-9986-B31855C1571C		RKI	ncov	Human	B.1.1.7	20I (Alpha, V1)	2021-03-19	Europe	Germany	Nordrhein-Westfalen	Landkreis Bonn; Stadt	Bonn	53115	50.7272	7.0851		20I (Alpha, V1)	B.1.1.7	false	false	false	false	false	false	false	false	false
IMS-10087-CVDP-77FC2478-C76F-4501-94CE-10BBCB0DAA63		RKI	ncov	Human	B.1.1.7	20I (Alpha, V1)	2021-04-22	Europe	Germany	Nordrhein-Westfalen	Landkreis Köln; Stadt	Köln	50858	50.9243	6.8565		20I (Alpha, V1)	B.1.1.7	false	false	false	false	false	false	false	false	false
IMS-10013-CVDP-83CA5881-2D13-48F2-A33A-45DB903DDFDF		RKI	ncov	Human	B.1.1.7	20I (Alpha, V1)	2021-03-31	Europe	Germany	Sachsen	Landkreis Nordsachsen	Wermsdorf	4779	51.2833	12.95		20I (Alpha, V1)	B.1.1.7	false	false	false	false	false	false	false	false	false
IMS-10020-CVDP-5F0C597C-588E-4200-8745-7435A1245068		RKI	ncov	Human	B.1.1.7	20I (Alpha, V1)	2021-03-10	Europe	Germany	Baden-Württemberg	Landkreis Esslingen	Leinfelden-Echterdingen	70771	48.6941	9.1681		20I (Alpha, V1)	B.1.1.7	false	false	false	false	false	false	false	false	false
IMS-10150-CVDP-C646E2B1-8B6A-415C-80A2-AC1D00C84C91		RKI	ncov	Human	B.1.1.7	20I (Alpha, V1)	2021-04-22	Europe	Germany	Nordrhein-Westfalen	Landkreis Leverkusen; Stadt	Leverkusen	51375	51.0331	7.052		20I (Alpha, V1)	B.1.1.7	false	false	false	false	false	false	false	false	false
IMS-10116-CVDP-F46BA792-258C-4A39-8BB2-008F6C2D5411		RKI	ncov	Human	B.1.1.7	20I (Alpha, V1)	2021-03-27	Europe	Germany	Berlin	Landkreis Berlin; Stadt	Berlin	13407	52.5727	13.3512		20I (Alpha, V1)	B.1.1.7	false	false	false	false	false	false	false	false	false
IMS-10020-CVDP-9FAF425A-A58B-4E48-A24A-50E8D4C40AFD		RKI	ncov	Human	B.1.1.7	20I (Alpha, V1)	2021-03-24	Europe	Germany	Baden-Württemberg	Landkreis Esslingen	Leinfelden-Echterdingen	70771	48.6941	9.1681		20I (Alpha, V1)	Q.7	false	false	false	false	false	false	false	false	false
IMS-10183-CVDP-45F66F96-12BB-4A75-BA12-AEDA60899524		RKI	ncov	Human	B.1.1.7	20I (Alpha, V1)	2021-02-23	Europe	Germany	Bayern	Landkreis Kempten (Allgäu)	Kempten	87435	47.7184	10.3132		20I (Alpha, V1)	B.1.1.7	false	false	false	false	false	false	false	false	false
IMS-10173-CVDP-1EFA777C-4187-42E8-ABC1-ACB28B6775C6		RKI	ncov	Human	B.1.1.7	20I (Alpha, V1)	2021-04-29	Europe	Germany	Nordrhein-Westfalen	Landkreis Minden-Lübbecke	Bad Oeynhausen	32545	52.1917	8.8093		20I (Alpha, V1)	B.1.1.7	false	false	false	false	false	false	false	false	false
IMS-10013-CVDP-4BDB2B6C-90EC-4950-B7FB-5D10BFAAD500		RKI	ncov	Human	B.1.1.7	20I (Alpha, V1)	2021-03-09	Europe	Germany	Bayern	Landkreis Augsburg; Stadt	Augsburg	86154	48.3932	10.8814		20I (Alpha, V1)	B.1.1.7	false	false	false	false	false	false	false	false	false
IMS-10020-CVDP-3BC33554-38F4-44A5-9A9B-0FAE3D3DCA7E		RKI	ncov	Human	B.1.1.7	20I (Alpha, V1)	2021-02-15	Europe	Germany	Baden-Württemberg	Landkreis Karlsruhe	Ettlingen	76275	48.9409	8.4076		20I (Alpha, V1)	B.1.1.7	false	false	false	false	false	false	false	false	false
IMS-10033-CVDP-C838BDD0-1356-42D5-9D27-8EC61173C95A		RKI	ncov	Human	B.1.1.7	20I (Alpha, V1)	2021-01-15	Europe	Germany	Schleswig-Holstein	Kreisfreie Stadt Kiel	Kiel	24106	54.3506	10.1205		20I (Alpha, V1)	B.1.1.7	false	false	false	false	false	false	false	false	false
IMS-10020-CVDP-8CEAB519-B483-4AF4-8C25-EB4A9D19AB91		RKI	ncov	Human	B.1.1.7	20I (Alpha, V1)	2021-03-23	Europe	Germany	Baden-Württemberg	Landkreis Esslingen	Leinfelden-Echterdingen	70771	48.6941	9.1681		20I (Alpha, V1)	B.1.1.7	false	false	false	false	false	false	false	false	true
IMS-10257-CVDP-74EE9C6C-D69B-4323-BE5C-5CA5140802C1		RKI	ncov	Human	B.1.1.7	20I (Alpha, V1)	2021-04-12	Europe	Germany	Hessen	Landkreis Frankfurt am Main; Stadt	Frankfurt am Main	65926	50.096	8.7111		20I (Alpha, V1)	B.1.1.7	false	false	false	false	false	false	false	false	false
IMS-10218-CVDP-7A8199D5-E130-4851-8151-61BB0424C2E6		RKI	ncov	Human	B.1.1.7	20I (Alpha, V1)	2021-03-17	Europe	Germany	Sachsen-Anhalt	Landkreis Landeshauptstadt Magdeburg	Magdeburg	39104	52.1243	11.6322		20I (Alpha, V1)	B.1.1.7	false	false	false	false	false	false	false	false	false
IMS-10150-CVDP-33F1E60A-ED40-4D4C-A48D-BB11D2E9A76E		RKI	ncov	Human	B.1.1.7	20I (Alpha, V1)	2021-04-24	Europe	Germany	Rheinland-Pfalz	Landkreis Trier; kreisfreie Stadt	Trier	54290	49.7537	6.6393		20I (Alpha, V1)	B.1.1.7	false	false	false	false	false	false	false	false	false
IMS-10338-CVDP-D5EBF1E8-99DD-4D36-847E-225352E555A4		RKI	ncov	Human	B.1.1.7	20I (Alpha, V1)	2021-02-24	Europe	Germany	Hessen	Landkreis Darmstadt; Wissenschaftsstadt	Darmstadt	64283	49.8719	8.6484		20I (Alpha, V1)	B.1.1.7	false	false	false	false	false	false	false	false	false
IMS-10020-CVDP-6561DBC8-B6DA-4F8E-AD1B-2CA6D5B2839E		RKI	ncov	Human	B.1.1.7	20I (Alpha, V1)	2021-02-11	Europe	Germany	Bayern	Landkreis Weiden i.d.OPf.	Weiden	92637	49.6768	12.1561		20I (Alpha, V1)	B.1.1.7	false	false	false	false	false	false	false	false	false
IMS-10183-CVDP-AE90F769-6167-4118-A70B-F617965CBFE7		RKI	ncov	Human	B.1.1.7	20I (Alpha, V1)	2021-02-20	Europe	Germany	Hamburg	Landkreis Hamburg; Freie und Hansestadt	Hamburg	22081	53.5722	10.0031		20I (Alpha, V1)	B.1.1.7	false	false	false	false	false	false	false	false	false
IMS-10375-CVDP-970D96B4-76C7-48CE-B799-F890E1F9D563		RKI	ncov	Human	B.1.1.7	20I (Alpha, V1)	2021-03-26	Europe	Germany	Baden-Württemberg	Landkreis Heidelberg	Heidelberg	69120	49.4169	8.6764		20I (Alpha, V1)	B.1.1.7	false	false	false	false	false	false	false	false	false
IMS-10036-CVDP-5B355DEA-54F6-4239-AA67-2DECD2B925E5		RKI	ncov	Human	B.1.1.7	20I (Alpha, V1)	2021-03-04	Europe	Germany	Mecklenburg-Vorpommern	Kreisfreie Stadt Rostock	Rostock	18059	54.0679	12.1186		20I (Alpha, V1)	B.1.1.7	false	false	false	false	false	false	false	false	false
IMS-10061-CVDP-3A7D1166-58CE-4250-B4FC-4381430F9467		RKI	ncov	Human	B.1.1.7	20I (Alpha, V1)	2021-03-30	Europe	Germany	Bayern	Würzburg; Stadt	Würzburg	97072	49.7829	9.9366		20I (Alpha, V1)	Q.7	false	false	false	false	false	false	false	false	false
IMS-10294-CVDP-DDA43E35-DCE1-4CBF-8442-80C7A11D2626		RKI	ncov	Human	B.1.1.7	20I (Alpha, V1)	2021-03-14	Europe	Germany	Nordrhein-Westfalen	Landkreis Düsseldorf; Stadt	Düsseldorf	40477	51.2371	6.7795		20I (Alpha, V1)	B.1.1.7	false	false	false	false	false	false	false	false	false
IMS-10594-CVDP-D545318A-247E-4839-B99A-35B8F096884D		RKI	ncov	Human	B.1.1.7	20I (Alpha, V1)	2021-05-03	Europe	Germany	Nordrhein-Westfalen	Landkreis Münster; Stadt	Münster	48153	51.9268	7.6313		20I (Alpha, V1)	B.1.1.7	false	false	false	false	false	false	false	false	false
IMS-10117-CVDP-964A2276-FBFE-46BA-B4E2-71D13578D485		RKI	ncov	Human	B.1.1.7	20I (Alpha, V1)	2021-04-20	Europe	Germany	Baden-Württemberg	Landkreis Rhein-Neckar-Kreis	Eppelheim	69214	49.4019	8.6364		20I (Alpha, V1)	B.1.1.7	false	false	false	false	false	false	false	false	false
IMS-10117-CVDP-6EF37DD9-4DBF-4652-BCBF-A9C178D37B69		RKI	ncov	Human	B.1.1.7	20I (Alpha, V1)	2021-03-24	Europe	Germany	Nordrhein-Westfalen	Landkreis Leverkusen; Stadt	Leverkusen	51375	51.0331	7.052		20I (Alpha, V1)	B.1.1.7	false	false	false	false	false	false	false	false	false
IMS-10117-CVDP-8340CE83-797F-44B3-AC02-11C28A587A93		RKI	ncov	Human	B.1.1.7	20I (Alpha, V1)	2021-05-03	Europe	Germany	Baden-Württemberg	Landkreis Rhein-Neckar-Kreis	Eppelheim	69214	49.4019	8.6364		20I (Alpha, V1)	B.1.1.7	false	false	false	false	false	false	false	false	false
IMS-10020-CVDP-115006D2-66F3-4894-9E41-F8B56372232A		RKI	ncov	Human	B.1.1.7	20I (Alpha, V1)	2021-04-07	Europe	Germany	Baden-Württemberg	Landkreis Esslingen	Leinfelden-Echterdingen	70771	48.6941	9.1681		20I (Alpha, V1)	B.1.1.7	false	false	false	false	false	false	false	false	false
IMS-10061-CVDP-2C25B879-F2B1-4CEB-8A09-A2FA693BF9BE		RKI	ncov	Human	B.1.1.7	20I (Alpha, V1)	2021-03-15	Europe	Germany	Niedersachsen	Landkreis Hameln-Pyrmont	Hameln	31785	52.1037	9.3676		20I (Alpha, V1)	B.1.1.7	false	false	false	false	false	false	false	false	false
IMS-10375-CVDP-226473E7-236B-4503-9D59-4DE9797B311B		RKI	ncov	Human	B.1.1.7	20I (Alpha, V1)	2021-03-26	Europe	Germany	Baden-Württemberg	Landkreis Mannheim	Mannheim	68167	49.4996	8.4939		20I (Alpha, V1)	B.1.1.7	false	false	false	false	false	false	false	false	false
IMS-10582-CVDP-89A4BD8A-D224-4FD5-9117-7E25BD09BD85		RKI	ncov	Human	B.1.1.7	20I (Alpha, V1)	2021-05-06	Europe	Germany	Mecklenburg-Vorpommern	Landkreis Vorpommern-Greifswald	Greifswald	17493	54.0902	13.4464		20I (Alpha, V1)	B.1.1.7	false	false	false	false	false	false	false	false	false
IMS-10218-CVDP-53AE8522-2C21-4CCC-AFD0-D3A2A427830C		RKI	ncov	Human	B.1.1.7	20I (Alpha, V1)	2021-03-30	Europe	Germany	Sachsen-Anhalt	Landkreis Landeshauptstadt Magdeburg	Magdeburg	39104	52.1243	11.6322		20I (Alpha, V1)	B.1.1.7	false	false	false	false	false	false	false	false	false
IMS-10020-CVDP-4ED2F883-F8BD-47E6-AD31-59F1765FE361		RKI	ncov	Human	B.1.1.7	20I (Alpha, V1)	2021-02-10	Europe	Germany	Rheinland-Pfalz	Landkreis Trier; kreisfreie Stadt	Trier	54290	49.7537	6.6393		20I (Alpha, V1)	B.1.1.7	false	false	false	false	false	false	false	false	false
IMS-10061-CVDP-C2A2D0D1-3D45-45BC-B8EA-8A2B58BCE96D		RKI	ncov	Human	B.1.1.7	20I (Alpha, V1)	2021-03-15	Europe	Germany	Niedersachsen	Landkreis Göttingen	Göttingen	37077	51.5604	9.9319		20I (Alpha, V1)	B.1.1.7	false	false	false	false	false	false	false	false	false
IMS-10150-CVDP-1A4FF5D6-1097-42BD-9622-041F1B646785		RKI	ncov	Human	B.1.1.7	20I (Alpha, V1)	2021-04-20	Europe	Germany	Nordrhein-Westfalen	Landkreis Leverkusen; Stadt	Leverkusen	51375	51.0331	7.052		20I (Alpha, V1)	B.1.1.7	false	false	false	false	false	false	false	false	false
IMS-10267-CVDP-A59D308A-3BCD-4485-8B7C-5D61B00B2990		RKI	ncov	Human	B.1.1.7	20I (Alpha, V1)	2021-04-19	Europe	Germany	Nordrhein-Westfalen	Landkreis Dortmund; Stadt	Dortmund	44137	51.5097	7.4601		20I (Alpha, V1)	B.1.1.7	false	false	false	false	false	false	false	false	false
IMS-10307-CVDP-43CBFE80-4CBC-40AD-858F-0E4E258F82E9		RKI	ncov	Human	B.1.1.7	20I (Alpha, V1)	2021-03-12	Europe	Germany	Bayern	Landkreis Schwandorf	Burglengenfeld	93133	49.2038	12.0445		20I (Alpha, V1)	B.1.1.7	false	false	false	false	false	false	false	false	false
IMS-10033-CVDP-4542B84A-EE10-47D9-9FF0-29F65938102C		RKI	ncov	Human	B.1.1.7	20I (Alpha, V1)	2021-03-05	Europe	Germany	Berlin	Landkreis Berlin; Stadt	Berlin	13353	52.5416	13.3495		20I (Alpha, V1)	B.1.1.7	false	false	false	false	false	false	false	false	false
IMS-10267-CVDP-A62EBB7A-CD6D-45CF-A684-6A9E84A16757		RKI	ncov	Human	B.1.1.7	20I (Alpha, V1)	2021-02-23	Europe	Germany	Nordrhein-Westfalen	Landkreis Märkischer Kreis	Lüdenscheid	58515	51.2012	7.6258		20I (Alpha, V1)	B.1.1.7	false	false	false	false	false	false	false	false	false
IMS-10004-CVDP-E3F5FE7B-E9CB-4E17-B39A-C3B2AECF3AFA		RKI	ncov	Human	B.1.1.7	20I (Alpha, V1)	2021-04-13	Europe	Germany	Schleswig-Holstein	Kreis Herzogtum Lauenburg	Kreis Herzogtum Lauenburg	21502	53.5966	10.5762		20I (Alpha, V1)	B.1.1.7	false	false	false	false	false	false	false	false	false
IMS-10020-CVDP-D6A736FA-AA5E-495C-BA3F-C3B64DB02473		RKI	ncov	Human	B.1.1.7	20I (Alpha, V1)	2021-03-13	Europe	Germany	Rheinland-Pfalz	Landkreis Trier; kreisfreie Stadt	Trier	54290	49.7537	6.6393		20I (Alpha, V1)	B.1.1.7	false	false	false	false	false	false	false	false	false
IMS-10338-CVDP-2F596A51-A52F-4C47-9158-0B3F9F5E3038		RKI	ncov	Human	B.1.1.7	20I (Alpha, V1)	2021-03-22	Europe	Germany	Hessen	Landkreis Frankfurt am Main; Stadt	Frankfurt am Main	60327	50.1038	8.6522		20I (Alpha, V1)	B.1.1.7	false	false	false	false	false	false	false	false	false
IMS-10020-CVDP-212B48D9-2C09-4E13-A3FA-C6B2B504AB02		RKI	ncov	Human	B.1.1.7	20I (Alpha, V1)	2021-04-02	Europe	Germany	Baden-Württemberg	Landkreis Esslingen	Leinfelden-Echterdingen	70771	48.6941	9.1681		20I (Alpha, V1)	Q.7	false	false	false	false	false	false	false	false	false
IMS-10020-CVDP-0D180011-A61B-4AE1-8C9C-DB8F67B786EC		RKI	ncov	Human	B.1.1.7	20I (Alpha, V1)	2021-04-11	Europe	Germany	Berlin	Landkreis Berlin; Stadt	Berlin	10829	52.4761	13.3607		20I (Alpha, V1)	B.1.1.7	false	false	false	false	false	false	false	false	false
IMS-10150-CVDP-2549A147-A26B-40B3-99D7-E89164C9B865		RKI	ncov	Human	B.1.1.7	20I (Alpha, V1)	2021-05-05	Europe	Germany	Rheinland-Pfalz	Landkreis Trier; kreisfreie Stadt	Trier	54290	49.7537	6.6393		20I (Alpha, V1)	B.1.1.7	false	false	false	false	false	false	false	false	false
IMS-10203-CVDP-6E1EFF5D-782E-4564-9A76-C7178B6F910C		RKI	ncov	Human	B.1.1.7	20I (Alpha, V1)	2021-03-15	Europe	Germany	Hamburg	Landkreis Hamburg; Freie und Hansestadt	Hamburg	20095	53.5722	10.0031		20I (Alpha, V1)	B.1.1.7	false	false	false	false	false	false	false	false	false
IMS-10013-CVDP-25EEEA59-AA77-474F-B0E0-E60C88D5D20E		RKI	ncov	Human	B.1.1.7	20I (Alpha, V1)	2021-02-24	Europe	Germany	Sachsen	Landkreis Nordsachsen	Wermsdorf	4779	51.2833	12.95		20I (Alpha, V1)	B.1.1.7	false	false	false	false	false	false	false	false	false
6166ba5c81e18c1c41ced6e4	1091274330	IIMK	ncov	Human	B.1.1.7	20I (Alpha, V1)	2021-02-24	Europe	Germany	Thuringia	Landkreis Gotha	Nesse-Apfelstädt	99192	50.921	10.9039	49	20I (Alpha, V1)	B.1.1.7	false	false	false	false	false	false	false	false	true
IMS-10117-CVDP-000D79B3-3C53-4497-A304-EA916EF53F26		RKI	ncov	Human	B.1.1.7	20I (Alpha, V1)	2021-03-19	Europe	Germany	Baden-Württemberg	Landkreis Rhein-Neckar-Kreis	Eppelheim	69214	49.4019	8.6364		20I (Alpha, V1)	B.1.1.7	false	false	false	false	false	false	false	false	false
6166ba5c81e18c1c41cedad1	1050170931	IIMK	ncov	Human	B.1.1.7	20I (Alpha, V1)	2021-03-13	Europe	Germany	Thuringia	Landkreis Gera	Gera	7546	50.8753	12.0788	540	20I (Alpha, V1)	B.1.1.7	false	false	false	false	false	false	false	false	false
IMS-10020-CVDP-DB9F29AA-4C88-4A0B-8EBC-EA7028E6AE99		RKI	ncov	Human	B.1.1.7	20I (Alpha, V1)	2021-02-19	Europe	Germany	Bayern	Landkreis Weiden i.d.OPf.	Weiden	92637	49.6768	12.1561		20I (Alpha, V1)	B.1.1.7	false	false	false	false	false	false	false	false	false
IMS-10020-CVDP-5F22A063-B592-4205-B379-5226FF30018B		RKI	ncov	Human	B.1.1.7	20I (Alpha, V1)	2021-02-22	Europe	Germany	Baden-Württemberg	Landkreis Karlsruhe	Ettlingen	76275	48.9409	8.4076		20I (Alpha, V1)	Q.7	false	false	false	false	false	false	false	false	false
IMS-10122-CVDP-900F10A3-41AD-4761-98D0-6E1BADA452E8		RKI	ncov	Human	B.1.1.7	20I (Alpha, V1)	2021-03-19	Europe	Germany	Baden-Württemberg	Landkreis Ravensburg	Ravensburg	88212	47.7815	9.6183		20I (Alpha, V1)	B.1.1.7	false	false	false	false	false	false	false	false	false
[truncated: 71,327 more rows]
